# Supplementary material
Source: PubMed Central journal article supplement (PMC4350037)
Supplement: supp_M114.044321_mcp.M114.044321-2.pdf [file supp_M114.044321_mcp.M114.044321-2.pdf]

Supplementary Table 1. Overview of peptide identification and quantification result for the singly analyzed samples (120 proteins)

| N | Sequence coverage |        |                    |                                | Conf | Sequence | Modifications                                                                                         | Cleavages                    | dMass       | Prec.MW    | Prec.m.z | Theor.MW   | Theor.m.z  | Theor.z | Sc | Time    | Protein Concentration [fmol/μl] |
|---|-------------------|--------|--------------------|--------------------------------|------|----------|-------------------------------------------------------------------------------------------------------|------------------------------|-------------|------------|----------|------------|------------|---------|----|---------|---------------------------------|
|   | Unused            | Total  | Accessions         |                                |      |          |                                                                                                       |                              |             |            |          |            |            |         |    |         |                                 |
| 1 | 103.53            | 103.53 | 78.6 DNM1L_FlexIII | 99.0 AEELLAEEK                 |      |          | Label:13C(6)15N(2)(K)@9                                                                               |                              | 0.00038478  | 1038.53284 | 520.2737 | 1038.53247 | 520.273499 | 2       | 12 | 15.9005 | 38.55                           |
| 1 | 103.53            | 103.53 | 78.6 DNM1L_FlexIII | 99.0 ALQGASQIAEIR              |      |          |                                                                                                       |                              | 0.00184088  | 1368.77441 | 685.3945 | 1368.77246 | 685.393555 | 2       | 18 | 18.5792 | 38.55                           |
| 1 | 103.53            | 103.53 | 78.6 DNM1L_FlexIII | 99.0 AVMHFLVNHVK               |      |          | Label:13C(6)15N(2)(K)@11                                                                              |                              | 0.00065626  | 1301.71643 | 651.8655 | 1301.71582 | 651.865173 | 2       | 18 | 16.2872 | 38.55                           |
| 1 | 103.53            | 103.53 | 78.6 DNM1L_FlexIII | 99.0 AVMHFLVNHVKDTLQSELVGQLYK  |      |          | Label:13C(6)15N(2)(K)@11; Label:13C(6)15N(2)(K)@24                                                    | missed K-D@11                | -0.00375459 | 2784.49341 | 697.1306 | 2784.49683 | 697.13147  | 4       | 21 | 18.9102 | 38.55                           |
| 1 | 103.53            | 103.53 | 78.6 DNM1L_FlexIII | 99.0 CVELVHEEMQR               |      |          | Propionamide(C)@1; Label:13C(6)15N(4)(R)@11                                                           |                              | 0.00282346  | 1452.6759  | 727.3452 | 1452.67285 | 727.34375  | 2       | 18 | 15.6987 | 38.55                           |
| 1 | 103.53            | 103.53 | 78.6 DNM1L_FlexIII | 99.0 DKLQDSR                   |      |          | Label:13C(6)15N(2)(K)@2; Label:13C(6)15N(4)(R)@8                                                      | missed K-L@2                 | 0.00305927  | 991.544861 | 496.7797 | 991.541748 | 496.778137 | 2       | 11 | 13.6855 | 38.55                           |
| 1 | 103.53            | 103.53 | 78.6 DNM1L_FlexIII | 99.0 DTLOSELVGQLYK             |      |          | Label:13C(6)15N(2)(K)@13                                                                              |                              | 0.00304532  | 1500.79443 | 751.4045 | 1500.7915  | 751.403015 | 2       | 18 | 18.7939 | 38.55                           |
| 1 | 103.53            | 103.53 | 78.6 DNM1L_FlexIII | 99.0 FATEYCNITGTAKE            |      |          | Propionamide(C)@6; Label:13C(6)15N(2)(K)@14                                                           |                              | 0.0035804   | 1625.75232 | 813.8834 | 1625.74866 | 813.881592 | 2       | 17 | 16.455  | 38.55                           |
| 1 | 103.53            | 103.53 | 78.6 DNM1L_FlexIII | 99.0 FISNPNSILAVTAANTDMATSEALK |      |          | Label:13C(6)15N(2)(K)@26                                                                              |                              | -0.00809114 | 2699.38501 | 900.8023 | 2699.39307 | 900.804993 | 3       | 19 | 20.3448 | 38.55                           |
| 1 | 103.53            | 103.53 | 78.6 DNM1L_FlexIII | 99.0 GHAVNLLDVPVPVAPR          |      |          | Label:13C(6)15N(4)(R)@15                                                                              |                              | 0.00174782  | 1565.89343 | 783.954  | 1565.89172 | 783.953125 | 2       | 21 | 18.2268 | 38.55                           |
| 1 | 103.53            | 103.53 | 78.6 DNM1L_FlexIII | 99.0 HPDFADACGLMNNNIEEQR       |      |          | Propionamide(C)@8; Label:13C(6)15N(4)(R)@19                                                           |                              | 0.00056212  | 2253.97754 | 752.3331 | 2253.97705 | 752.332947 | 3       | 22 | 17.2336 | 38.55                           |
| 1 | 103.53            | 103.53 | 78.6 DNM1L_FlexIII | 99.0 HPDFADACGLMNNNIEEQRR      |      |          | Propionamide(C)@8; Label:13C(6)15N(4)(R)@19; Label:13C(6)15N(4)(R)@20                                 | missed R-R@19                | -0.00526814 | 2420.08106 | 807.701  | 2420.08643 | 807.702759 | 3       | 14 | 16.8045 | 38.55                           |
| 1 | 103.53            | 103.53 | 78.6 DNM1L_FlexIII | 99.0 ICYIFHETFFGR              |      |          | Propionamide(C)@2; Label:13C(6)15N(4)(R)@11                                                           |                              | 0.00220862  | 1465.70752 | 733.861  | 1465.7052  | 733.859863 | 2       | 19 | 17.6981 | 38.55                           |
| 1 | 103.53            | 103.53 | 78.6 DNM1L_FlexIII | 99.0 IFSPNVNLTLDVLPGMTK        |      |          |                                                                                                       |                              | -0.00683194 | 2057.11523 | 1029.565 | 2057.12305 | 1029.56885 | 2       | 20 | 20.3601 | 38.55                           |
| 1 | 103.53            | 103.53 | 78.6 DNM1L_FlexIII | 99.0 IIQHCSNYSYTOELLR          |      |          | Propionamide(C)@5; Label:13C(6)15N(4)(R)@15                                                           |                              | -0.0002571  | 1884.93909 | 629.3203 | 1884.93921 | 629.320313 | 3       | 21 | 16.3288 | 38.55                           |
| 1 | 103.53            | 103.53 | 78.6 DNM1L_FlexIII | 99.0 INVLAAQYQSLNLSYGEPPVDDK   |      |          | Deamidated(Q)@9; Label:13C(6)15N(2)(K)@22                                                             |                              | 0.0354876   | 2445.25147 | 1223.633 | 2445.21558 | 1223.61499 | 2       | 22 | 19.4268 | 38.55                           |
| 1 | 103.53            | 103.53 | 78.6 DNM1L_FlexIII | 99.0 KNIQDSVPK                 |      |          | Label:13C(6)15N(2)(K)@1; Label:13C(6)15N(2)(K)@9                                                      | missed K-N@1                 | 0.00075406  | 1043.59522 | 522.8049 | 1043.5946  | 522.804565 | 2       | 14 | 14.2045 | 38.55                           |
| 1 | 103.53            | 103.53 | 78.6 DNM1L_FlexIII | 99.0 KTTGEENGVEAEIEWGK         |      |          | Label:13C(6)15N(2)(K)@1; Label:13C(6)15N(2)(K)@16                                                     | missed K-T@1                 | 0.00146703  | 1778.83093 | 593.9509 | 1778.82935 | 593.950378 | 3       | 20 | 15.4553 | 38.55                           |
| 1 | 103.53            | 103.53 | 78.6 DNM1L_FlexIII | 99.0 LDLMDAGTDAMDVLVLMGR       |      |          |                                                                                                       |                              | -0.00757818 | 1822.81885 | 912.4167 | 1822.82629 | 912.420471 | 2       | 19 | 20.6342 | 38.55                           |
| 1 | 103.53            | 103.53 | 78.6 DNM1L_FlexIII | 99.0 LHDAIVEVTCCLRK            |      |          | Propionamide(C)@11; Label:13C(6)15N(4)(R)@14                                                          |                              | -0.00836883 | 1660.91248 | 554.6448 | 1660.92102 | 554.647583 | 3       | 18 | 20.3931 | 38.55                           |
| 1 | 103.53            | 103.53 | 78.6 DNM1L_FlexIII | 99.0 LHDAIVEVTCCLRK            |      |          | Propionamide(C)@11; Label:13C(6)15N(4)(R)@14; Label:13C(6)15N(2)(K)@15                                | missed R-K@14                | 0.00841351  | 1797.03845 | 600.0201 | 1797.03015 | 600.017334 | 3       | 18 | 19.8954 | 38.55                           |
| 1 | 103.53            | 103.53 | 78.6 DNM1L_FlexIII | 99.0 LPVTNEMVHNLVIAELAYINTK    |      |          | Label:13C(6)15N(2)(K)@22                                                                              |                              | -0.00669129 | 2489.33765 | 830.7865 | 2489.34424 | 830.788696 | 3       | 21 | 20.4159 | 38.55                           |
| 1 | 103.53            | 103.53 | 78.6 DNM1L_FlexIII | 99.0 LYTFDEIRQEIENETER         |      |          | Label:13C(6)15N(4)(R)@9; Label:13C(6)15N(4)(R)@18                                                     | missed R-Q@9                 | 0.0135514   | 2319.08936 | 1160.552 | 2319.0769  | 1160.54578 | 2       | 20 | 19.0142 | 38.55                           |
| 1 | 103.53            | 103.53 | 78.6 DNM1L_FlexIII | 99.0 MEALPIVINK                |      |          | Label:13C(6)15N(2)(K)@10                                                                              |                              | 0.00923444  | 1134.66553 | 568.34   | 1134.65625 | 568.335388 | 2       | 12 | 18.3305 | 38.55                           |
| 1 | 103.53            | 103.53 | 78.6 DNM1L_FlexIII | 99.0 NATGPRPALFVPEVSFELLVK     |      |          | Label:13C(6)15N(4)(R)@6; Label:13C(6)15N(2)(K)@21                                                     |                              | -0.00460559 | 2301.28076 | 768.1008 | 2301.28516 | 768.102356 | 3       | 16 | 20.1667 | 38.55                           |
| 1 | 103.53            | 103.53 | 78.6 DNM1L_FlexIII | 99.0 NVASGGGGVGSDGVOEPTGNWNR   |      |          | Label:13C(6)15N(4)(R)@22                                                                              |                              | -0.00609075 | 2123.97974 | 709.0005 | 2123.98608 | 709.002625 | 3       | 24 | 16.4378 | 38.55                           |
| 1 | 103.53            | 103.53 | 78.6 DNM1L_FlexIII | 99.0 RLEEPSLR                  |      |          | Label:13C(6)15N(4)(R)@1; Label:13C(6)15N(4)(R)@8                                                      | missed R-L@1                 | -0.00251085 | 1018.56488 | 510.2897 | 1018.56744 | 510.290985 | 2       | 12 | 15.2147 | 38.55                           |
| 1 | 103.53            | 103.53 | 78.6 DNM1L_FlexIII | 99.0 RLPVTNEMVHNLVIAELAYINTK   |      |          | Label:13C(6)15N(4)(R)@1; Label:13C(6)15N(2)(K)@23                                                     | missed R-L@1                 | 0.00835255  | 2655.46216 | 886.1613 | 2655.45361 | 886.158508 | 3       | 20 | 20.1311 | 38.55                           |
| 1 | 103.53            | 103.53 | 78.6 DNM1L_FlexIII | 99.0 RPLILQLVHVSQEDK           |      |          | Label:13C(6)15N(4)(R)@1; Label:13C(6)15N(2)(K)@15                                                     |                              | -0.00435879 | 1792.02832 | 897.0214 | 1792.03259 | 897.02356  | 2       | 23 | 17.8247 | 38.55                           |
| 1 | 103.53            | 103.53 | 78.6 DNM1L_FlexIII | 99.0 RPLILQLVHVSQEDKRK         |      |          | Label:13C(6)15N(4)(R)@1; Label:13C(6)15N(2)(K)@15; Label:13C(6)15N(4)(R)@16                           | missed K-R@15                | -0.0124609  | 1958.1294  | 490.5396 | 1958.14197 | 490.542755 | 4       | 19 | 17.2813 | 38.55                           |
| 1 | 103.53            | 103.53 | 78.6 DNM1L_FlexIII | 99.0 RPLILQLVHVSQEDKRK         |      |          | Label:13C(6)15N(4)(R)@1; Label:13C(6)15N(2)(K)@15; Label:13C(6)15N(4)(R)@16; Label:13C(6)15N(2)(K)@17 | missed K-R@15; missed R-K@16 | -0.0104966  | 2094.25024 | 524.5698 | 2094.25122 | 524.570068 | 4       | 17 | 16.8677 | 38.55                           |
| 1 | 103.53            | 103.53 | 78.6 DNM1L_FlexIII | 99.0 SATLLQLITK                |      |          | Label:13C(6)15N(2)(K)@10                                                                              |                              | -0.00389162 | 1094.67505 | 548.3448 | 1094.67908 | 548.346802 | 2       | 12 | 19.4648 | 38.55                           |
| 1 | 103.53            | 103.53 | 78.6 DNM1L_FlexIII | 99.0 SKPIIMPASPQK              |      |          | Label:13C(6)15N(2)(K)@2; Label:13C(6)15N(2)(K)@13                                                     |                              | 0.00186395  | 1408.8103  | 705.4124 | 1408.80835 | 705.411438 | 2       | 17 | 15.9873 | 38.55                           |
| 1 | 103.53            | 103.53 | 78.6 DNM1L_FlexIII | 99.0 SSLDDLLTSEEDMAQR          |      |          | Label:13C(6)15N(4)(R)@17                                                                              |                              | -0.0133493  | 1931.88892 | 966.9517 | 1931.9021  | 966.958374 | 2       | 18 | 21.0306 | 38.55                           |
| 1 | 103.53            | 103.53 | 78.6 DNM1L_FlexIII | 99.0 SSVLESVLGR                |      |          | Label:13C(6)15N(4)(R)@10                                                                              |                              | -0.0169287  | 1055.5835  | 528.799  | 1055.58508 | 528.799805 | 2       | 6  | 0.2868  | 38.55                           |
| 1 | 103.53            | 103.53 | 78.6 DNM1L_FlexIII | 99.0 SVTDSIRDEYAFLOK           |      |          | Label:13C(6)15N(4)(R)@7; Label:13C(6)15N(2)(K)@15                                                     | missed R-D@7                 | 0.00692181  | 1788.90833 | 895.4614 | 1788.90125 | 895.457947 | 2       | 20 | 17.8822 | 38.55                           |
| 1 | 103.53            | 103.53 | 78.6 DNM1L_FlexIII | 99.0 TLESVDPLGGTLTIDILTAIR     |      |          | Deamidated(N)@12                                                                                      |                              | 0.0101101   | 2211.20947 | 1106.612 | 2211.19971 | 1106.60718 | 2       | 19 | 20.6291 | 38.55                           |
| 1 | 103.53            | 103.53 | 78.6 DNM1L_FlexIII | 99.0 TSKAEELLAEEK              |      |          | Label:13C(6)15N(2)(K)@3; Label:13C(6)15N(2)(K)@12                                                     | missed K-A@3                 | 0.00149134  | 1362.7229  | 682.3687 | 1362.72131 | 682.36792  | 2       | 20 | 15.7774 | 38.55                           |
| 1 | 103.53            | 103.53 | 78.6 DNM1L_FlexIII | 99.0 TTGEENGVEAEIEWGK          |      |          | Label:13C(6)15N(2)(K)@15                                                                              |                              | 0.00330725  | 1642.72351 | 822.369  | 1642.72022 | 822.367371 | 2       | 20 | 16.1105 | 38.55                           |
| 1 | 103.53            | 103.53 | 78.6 DNM1L_FlexIII | 99.0 VPPVGDDPKDIELQIR          |      |          | Label:13C(6)15N(2)(K)@8; Label:13C(6)15N(4)(R)@15                                                     | missed K-D@8                 | -0.0006452  | 1723.95813 | 575.66   | 1723.95874 | 575.660217 | 3       | 14 | 16.8575 | 38.55                           |
| 1 | 103.53            | 103.53 | 78.6 DNM1L_FlexIII | 99.0 YIETSELGGGAR              |      |          | Propionamide(C)@8; Label:13C(6)15N(4)(R)@12                                                           |                              | 0.00175749  | 1378.64453 | 690.3295 | 1378.64258 | 690.328613 | 2       | 16 | 16.0499 | 38.55                           |
| 1 | 103.53            | 103.53 | 78.6 DNM1L_FlexIII | 99.0 YPTFLYK                   |      |          | Label:13C(6)15N(2)(K)@7                                                                               | cleaved W-Y@N-term           | -0.00061447 | 938.498657 | 470.2566 | 938.499329 | 470.256928 | 2       | 9  | 17.7815 | 38.55                           |
| 1 | 103.53            | 103.53 | 78.6 DNM1L_FlexIII | 99.0 AEELLAEEK                 |      |          | Label:13C(6)15N(2)(K)@9                                                                               |                              | -0.00742775 | 1038.52502 | 520.2698 | 1038.53247 | 520.273499 | 2       | 12 | 15.8403 | 38.55                           |
| 1 | 103.53            | 103.53 | 78.6 DNM1L_FlexIII | 99.0 ALQGASQIAEIR              |      |          | Label:13C(6)15N(4)(R)@13                                                                              |                              | 0.00045043  | 1378.78125 | 690.3979 | 1378.78076 | 690.39764  |         |    |         |                                 |

|   |        |        |      |              |      |                           |                                                                                             |                |             |            |          |            |            |   |    |         |       |
|---|--------|--------|------|--------------|------|---------------------------|---------------------------------------------------------------------------------------------|----------------|-------------|------------|----------|------------|------------|---|----|---------|-------|
| 1 | 103.53 | 103.53 | 78.6 | DNM1L_FlexII | 99.0 | AVMHFLVNHVKDTLOSELVGQLYK  | Deamidated(N) @8; Label:13C(6)15N(2)(K) @11; Label:13C(6)15N(2)(K) @24                      | missed K-D @11 | 0.0319553   | 2785.5127  | 929.5115 | 2785.48071 | 929.500855 | 3 | 17 | 18.8874 | 38.55 |
| 1 | 103.53 | 103.53 | 78.6 | DNM1L_FlexII | 99.0 | AVMHFLVNHVKDTLOSELVGQLYK  | Label:13C(6)15N(2)(K) @11; Deamidated(Q) @15; Label:13C(6)15N(2)(K) @24                     | missed K-D @11 | 0.0122341   | 2785.49341 | 697.3806 | 2785.48071 | 697.377441 | 4 | 16 | 18.8672 | 38.55 |
| 1 | 103.53 | 103.53 | 78.6 | DNM1L_FlexII | 99.0 | CVELVHEEMQR               | Propionamide(C) @1; Label:13C(6)15N(4)(R) @11                                               |                | 0.00282346  | 1452.6759  | 727.3452 | 1452.67285 | 727.34375  | 2 | 18 | 15.6964 | 38.55 |
| 1 | 103.53 | 103.53 | 78.6 | DNM1L_FlexII | 99.0 | CVELVHEEMQR               | Propionamide(C) @1; Label:13C(6)15N(4)(R) @11                                               |                | 0.00282346  | 1452.6759  | 727.3452 | 1452.67285 | 727.34375  | 2 | 17 | 15.7036 | 38.55 |
| 1 | 103.53 | 103.53 | 78.6 | DNM1L_FlexII | 99.0 | CVELVHEEMQR               | Propionamide(C) @1; Label:13C(6)15N(4)(R) @11                                               |                | 0.00245725  | 1452.67542 | 727.345  | 1452.67285 | 727.34375  | 2 | 16 | 15.7285 | 38.55 |
| 1 | 103.53 | 103.53 | 78.6 | DNM1L_FlexII | 99.0 | CVELVHEEMQR               | Propionamide(C) @1; Label:13C(6)15N(4)(R) @11                                               |                | -0.00014351 | 1452.67273 | 485.2315 | 1452.67285 | 485.231567 | 3 | 13 | 15.664  | 38.55 |
| 1 | 103.53 | 103.53 | 78.6 | DNM1L_FlexII | 99.0 | CVELVHEEMQR               | Propionamide(C) @1; Label:13C(6)15N(4)(R) @11                                               |                | -0.00014351 | 1452.67273 | 485.2315 | 1452.67285 | 485.231567 | 3 | 12 | 15.6817 | 38.55 |
| 1 | 103.53 | 103.53 | 78.6 | DNM1L_FlexII | 99.0 | DTLOSELVGQLYK             | Label:13C(6)15N(2)(K) @13                                                                   |                | 0.00304532  | 1500.79443 | 751.4045 | 1500.7915  | 751.403015 | 2 | 18 | 18.7964 | 38.55 |
| 1 | 103.53 | 103.53 | 78.6 | DNM1L_FlexII | 99.0 | DTLOSELVGQLYK             | Label:13C(6)15N(2)(K) @13                                                                   |                | 0.00304532  | 1500.79443 | 751.4045 | 1500.7915  | 751.403015 | 2 | 16 | 18.804  | 38.55 |
| 1 | 103.53 | 103.53 | 78.6 | DNM1L_FlexII | 99.0 | FATEYCNTIEGTAK            | Propionamide(C) @6; Label:13C(6)15N(2)(K) @14                                               |                | 0.00321419  | 1625.75183 | 813.8832 | 1625.74866 | 813.881592 | 2 | 16 | 16.4153 | 38.55 |
| 1 | 103.53 | 103.53 | 78.6 | DNM1L_FlexII | 99.0 | FATEYCNTIEGTAK            | Propionamide(C) @6; Label:13C(6)15N(2)(K) @14                                               |                | 0.00321419  | 1625.75183 | 813.8832 | 1625.74866 | 813.881592 | 2 | 15 | 16.4353 | 38.55 |
| 1 | 103.53 | 103.53 | 78.6 | DNM1L_FlexII | 99.0 | FISNPNSILAFTAANTDMATSEALK | Deamidated(N) @6; Label:13C(6)15N(2)(K) @26                                                 |                | -0.00479784 | 2700.37231 | 901.1314 | 2700.3772  | 901.132996 | 3 | 19 | 20.0981 | 38.55 |
| 1 | 103.53 | 103.53 | 78.6 | DNM1L_FlexII | 99.0 | FISNPNSILAFTAANTDMATSEALK | Deamidated(N) @6; Label:13C(6)15N(2)(K) @26                                                 |                | 0.0148013   | 2700.39136 | 1351.203 | 2700.3772  | 1351.1958  | 2 | 23 | 20.2685 | 38.55 |
| 1 | 103.53 | 103.53 | 78.6 | DNM1L_FlexII | 99.0 | FISNPNSILAFTAANTDMATSEALK | Label:13C(6)15N(2)(K) @26                                                                   |                | -0.00626008 | 2699.38696 | 900.8029 | 2699.39307 | 900.804993 | 3 | 25 | 20.2811 | 38.55 |
| 1 | 103.53 | 103.53 | 78.6 | DNM1L_FlexII | 99.0 | FISNPNSILAFTAANTDMATSEALK | Label:13C(6)15N(2)(K) @26                                                                   |                | -0.00118738 | 2699.39136 | 1350.703 | 2699.39307 | 1350.70386 | 2 | 30 | 20.2887 | 38.55 |
| 1 | 103.53 | 103.53 | 78.6 | DNM1L_FlexII | 99.0 | FISNPNSILAFTAANTDMATSEALK | Label:13C(6)15N(2)(K) @26                                                                   |                | -0.0069925  | 2699.38623 | 900.8027 | 2699.39307 | 900.804993 | 3 | 22 | 20.3193 | 38.55 |
| 1 | 103.53 | 103.53 | 78.6 | DNM1L_FlexII | 99.0 | FISNPNSILAFTAANTDMATSEALK | Label:13C(6)15N(2)(K) @26                                                                   |                | -0.00240809 | 2699.39136 | 1350.703 | 2699.39307 | 1350.70386 | 2 | 22 | 20.3296 | 38.55 |
| 1 | 103.53 | 103.53 | 78.6 | DNM1L_FlexII | 99.0 | FISNPNSILAFTAANTDMATSEALK | Label:13C(6)15N(2)(K) @26                                                                   |                | -0.00411708 | 2699.3894  | 1350.702 | 2699.39307 | 1350.70386 | 2 | 20 | 20.3701 | 38.55 |
| 1 | 103.53 | 103.53 | 78.6 | DNM1L_FlexII | 99.0 | FISNPNSILAFTAANTDMATSEALK | Label:13C(6)15N(2)(K) @26                                                                   |                | -0.00094324 | 2699.39136 | 1350.703 | 2699.39307 | 1350.70386 | 2 | 23 | 20.5832 | 38.55 |
| 1 | 103.53 | 103.53 | 78.6 | DNM1L_FlexII | 99.0 | FISNPNSILAFTAANTDMATSEALK | Label:13C(6)15N(2)(K) @26                                                                   |                | -0.00021757 | 2699.39282 | 900.8049 | 2699.39307 | 900.804993 | 3 | 25 | 20.6137 | 38.55 |
| 1 | 103.53 | 103.53 | 78.6 | DNM1L_FlexII | 99.0 | FISNPNSILAFTAANTDMATSEALK | Label:13C(6)15N(2)(K) @26                                                                   |                | -0.00021757 | 2699.39282 | 900.8049 | 2699.39307 | 900.804993 | 3 | 25 | 20.6163 | 38.55 |
| 1 | 103.53 | 103.53 | 78.6 | DNM1L_FlexII | 99.0 | FISNPNSILAFTAANTDMATSEALK | Label:13C(6)15N(2)(K) @26                                                                   |                | -0.00296417 | 2699.39014 | 900.804  | 2699.39307 | 900.804993 | 3 | 22 | 20.6494 | 38.55 |
| 1 | 103.53 | 103.53 | 78.6 | DNM1L_FlexII | 99.0 | FISNPNSILAFTAANTDMATSEALK | Deamidated(N) @6; Label:13C(6)15N(2)(K) @26                                                 |                | 0.0234176   | 2700.40137 | 1351.208 | 2700.3772  | 1351.1958  | 2 | 20 | 20.2987 | 38.55 |
| 1 | 103.53 | 103.53 | 78.6 | DNM1L_FlexII | 99.0 | FISNPNSILAFTAANTDMATSEALK | Label:13C(6)15N(2)(K) @26                                                                   |                | -0.00667761 | 2699.38623 | 900.8027 | 2699.39307 | 900.804993 | 3 | 23 | 20.3215 | 38.55 |
| 1 | 103.53 | 103.53 | 78.6 | DNM1L_FlexII | 99.0 | FISNPNSILAFTAANTDMATSEALK | Deamidated(N) @6; Label:13C(6)15N(2)(K) @26                                                 |                | -0.0006313  | 2700.37671 | 901.1328 | 2700.3772  | 901.132996 | 3 | 19 | 20.324  | 38.55 |
| 1 | 103.53 | 103.53 | 78.6 | DNM1L_FlexII | 99.0 | FISNPNSILAFTAANTDMATSEALK | Label:13C(6)15N(2)(K) @26                                                                   |                | 0.00742246  | 2699.40137 | 1350.708 | 2699.39307 | 1350.70386 | 2 | 27 | 20.3266 | 38.55 |
| 1 | 103.53 | 103.53 | 78.6 | DNM1L_FlexII | 99.0 | FISNPNSILAFTAANTDMATSEALK | Label:13C(6)15N(2)(K) @26                                                                   |                | 0.00742246  | 2699.40137 | 1350.708 | 2699.39307 | 1350.70386 | 2 | 25 | 20.3318 | 38.55 |
| 1 | 103.53 | 103.53 | 78.6 | DNM1L_FlexII | 99.0 | FISNPNSILAFTAANTDMATSEALK | Label:13C(6)15N(2)(K) @26                                                                   |                | 0.00742246  | 2699.40137 | 1350.708 | 2699.39307 | 1350.70386 | 2 | 26 | 20.3395 | 38.55 |
| 1 | 103.53 | 103.53 | 78.6 | DNM1L_FlexII | 99.0 | FISNPNSILAFTAANTDMATSEALK | Deamidated(N) @1; Label:13C(6)15N(2)(K) @26                                                 |                | 0.0545531   | 2716.42651 | 906.4828 | 2716.37207 | 906.464661 | 3 | 13 | 20.4384 | 38.55 |
| 1 | 103.53 | 103.53 | 78.6 | DNM1L_FlexII | 99.0 | FISNPNSILAFTAANTDMATSEALK | Label:13C(6)15N(2)(K) @26                                                                   |                | 0.00728978  | 2699.40039 | 900.8074 | 2699.39307 | 900.804993 | 3 | 17 | 26.4382 | 38.55 |
| 1 | 103.53 | 103.53 | 78.6 | DNM1L_FlexII | 99.0 | FISNPNSILAFTAANTDMATSEALK | Deamidated(N) @16; Oxidation(M) @19; Label:13C(6)15N(2)(K) @26                              |                | 0.020253    | 2716.39233 | 906.4714 | 2716.37207 | 906.464661 | 3 | 18 | 19.8345 | 38.55 |
| 1 | 103.53 | 103.53 | 78.6 | DNM1L_FlexII | 99.0 | FISNPNSILAFTAANTDMATSEALK | Deamidated(N) @6; Label:13C(6)15N(2)(K) @26                                                 |                | 0.0348209   | 2700.41138 | 1351.213 | 2700.3772  | 1351.1958  | 2 | 13 | 26.4786 | 38.55 |
| 1 | 103.53 | 103.53 | 78.6 | DNM1L_FlexII | 99.0 | FISNPNSILAFTAANTDMATSEALK | Deamidated(N) @6; Label:13C(6)15N(2)(K) @26                                                 |                | 0.0252316   | 2700.40234 | 901.1414 | 2700.3772  | 901.132996 | 3 | 13 | 26.4222 | 38.55 |
| 1 | 103.53 | 103.53 | 78.6 | DNM1L_FlexII | 99.0 | FISNPNSILAFTAANTDMATSEALK | Deamidated(N) @1; Label:13C(6)15N(2)(K) @26                                                 |                | 0.0380143   | 2716.41016 | 906.4773 | 2716.37207 | 906.464661 | 3 | 15 | 20.388  | 38.55 |
| 1 | 103.53 | 103.53 | 78.6 | DNM1L_FlexII | 99.0 | FISNPNSILAFTAANTDMATSEALK | Deamidated(N) @1; Label:13C(6)15N(2)(K) @26                                                 |                | 0.0380143   | 2716.41016 | 906.4773 | 2716.37207 | 906.464661 | 3 | 15 | 20.4006 | 38.55 |
| 1 | 103.53 | 103.53 | 78.6 | DNM1L_FlexII | 99.0 | FISNPNSILAFTAANTDMATSEALK | Label:13C(6)15N(2)(K) @26                                                                   |                | -0.0108377  | 2699.38232 | 900.8014 | 2699.39307 | 900.804993 | 3 | 12 | 21.0611 | 38.55 |
| 1 | 103.53 | 103.53 | 78.6 | DNM1L_FlexII | 99.0 | FISNPNSILAFTAANTDMATSEALK | Deamidated(N) @1; Label:13C(6)15N(2)(K) @26                                                 |                | 0.0380143   | 2716.41016 | 906.4773 | 2716.37207 | 906.464661 | 3 | 14 | 20.4031 | 38.55 |
| 1 | 103.53 | 103.53 | 78.6 | DNM1L_FlexII | 99.0 | GHAVNLLDVPVPVVAR          | Label:13C(6)15N(4)(R) @15                                                                   |                | 0.00211403  | 1565.89392 | 783.9542 | 1565.89172 | 783.953125 | 2 | 21 | 18.1285 | 38.55 |
| 1 | 103.53 | 103.53 | 78.6 | DNM1L_FlexII | 99.0 | GHAVNLLDVPVPVVAR          | Label:13C(6)15N(4)(R) @15                                                                   |                | 0.00211403  | 1565.89392 | 783.9542 | 1565.89172 | 783.953125 | 2 | 22 | 18.1311 | 38.55 |
| 1 | 103.53 | 103.53 | 78.6 | DNM1L_FlexII | 99.0 | GHAVNLLDVPVPVVAR          | Label:13C(6)15N(4)(R) @15                                                                   |                | 0.00370095  | 1565.89551 | 783.955  | 1565.89172 | 783.953125 | 2 | 21 | 18.1612 | 38.55 |
| 1 | 103.53 | 103.53 | 78.6 | DNM1L_FlexII | 99.0 | GHAVNLLDVPVPVVAR          | Label:13C(6)15N(4)(R) @15                                                                   |                | -0.00430144 | 1565.88733 | 522.9697 | 1565.89172 | 522.971191 | 3 | 16 | 18.0935 | 38.55 |
| 1 | 103.53 | 103.53 | 78.6 | DNM1L_FlexII | 99.0 | GHAVNLLDVPVPVVAR          | Label:13C(6)15N(4)(R) @15                                                                   |                | 0.00082553  | 1565.89233 | 522.9714 | 1565.89172 | 522.971191 | 3 | 16 | 18.1336 | 38.55 |
| 1 | 103.53 | 103.53 | 78.6 | DNM1L_FlexII | 99.0 | GHAVNLLDVPVPVVAR          | Label:13C(6)15N(4)(R) @15                                                                   |                | 0.00119174  | 1565.89307 | 522.9716 | 1565.89172 | 522.971191 | 3 | 16 | 18.1711 | 38.55 |
| 1 | 103.53 | 103.53 | 78.6 | DNM1L_FlexII | 99.0 | GHAVNLLDVPVPVVAR          | Label:13C(6)15N(4)(R) @15                                                                   |                | -0.00118864 | 1565.89063 | 522.9708 | 1565.89172 | 522.971191 | 3 | 13 | 26.6236 | 38.55 |
| 1 | 103.53 | 103.53 | 78.6 | DNM1L_FlexII | 99.0 | GHAVNLLDVPVPVVAR          | Label:13C(6)15N(4)(R) @15                                                                   |                | -0.00430144 | 1565.88733 | 522.9697 | 1565.89172 | 522.971191 | 3 | 11 | 26.6847 | 38.55 |
| 1 | 103.53 | 103.53 | 78.6 | DNM1L_FlexII | 99.0 | HPDFADACGLMNNNIEEQR       | Propionamide(C) @8; Deamidated(N) @14; Label:13C(6)15N(4)(R) @19                            |                | 0.0293072   | 2254.99023 | 752.6707 | 2254.96118 | 752.66095  | 3 | 21 | 17.2011 | 38.55 |
| 1 | 103.53 | 103.53 | 78.6 | DNM1L_FlexII | 99.0 | HPDFADACGLMNNNIEEQR       | Propionamide(C) @8; Label:13C(6)15N(4)(R) @19                                               |                | 0.00056212  | 2253.97754 | 752.3331 | 2253.97705 | 752.332947 | 3 | 24 | 17.2259 | 38.55 |
| 1 | 103.53 | 103.53 | 78.6 | DNM1L_FlexII | 99.0 | HPDFADACGLMNNNIEEQR       | Propionamide(C) @8; Label:13C(6)15N(4)(R) @19                                               |                | 0.0130811   | 2253.98926 | 1128.002 | 2253.97705 | 1127.99585 | 2 | 27 | 17.2588 | 38.55 |
| 1 | 103.53 | 103.53 | 78.6 | DNM1L_FlexII | 99.0 | HPDFADACGLMNNNIEEQR       | Propionamide(C) @8; Label:13C(6)15N(4)(R) @19                                               |                | 0.00184387  | 2253.979   | 752.3336 | 2253.97705 | 752.332947 | 3 | 20 | 17.2639 | 38.55 |
| 1 | 103.53 | 103.53 | 78.6 | DNM1L_FlexII | 99.0 | HPDFADACGLMNNNIEEQR       | Propionamide(C) @8; Deamidated(N) @13; Label:13C(6)15N(4)(R) @19                            |                | 0.0290698   | 2254.98926 | 1128.502 | 2254.96118 | 1128.48779 | 2 | 17 | 17.2537 | 38.55 |
| 1 | 103.53 | 103.53 | 78.6 | DNM1L_FlexII | 99.0 | HPDFADACGLMNNNIEEQR       | Propionamide(C) @8; Deamidated(N) @12; Label:13C(6)15N(4)(R) @19; Label:13C(6)15N(4)(R) @20 | missed R-R @19 | 0.00077175  | 2421.07129 | 808.031  | 2421.07056 | 808.030762 | 3 | 14 | 16.7741 | 38.55 |
| 1 | 103.53 | 103.53 | 78.6 | DNM1L_FlexII | 99.0 | HPDFADACGLMNNNIEEQR       | Propionamide(C) @8; Label:13C(6)15N(4)(R) @19; Label:13C(6)15N(4)(R) @20                    | missed R-R @19 | 0.00510112  | 2420.0918  | 606.0302 | 2420.08643 | 606.02887  | 4 | 12 | 16.8121 | 38.55 |
| 1 | 103.53 | 103.53 | 78.6 | DNM1L_FlexII | 99.0 | ICIFYHETFGGR              | Propionamide(C) @2; Label:13C(6)15N(4)(R) @11                                               |                | 0.00220862  | 1465.70752 | 733.861  | 1465.7052  | 733.859663 | 2 | 18 | 17.6804 | 38.55 |
| 1 | 103.53 | 103.53 | 78.6 | DNM1L_FlexII | 99.0 | ICIFYHETFGGR              | Propionamide(C) @2; Label:13C(6)15N(4)(R) @11                                               |                | 0.0006217   | 1465.70593 | 733.8602 | 1465.7052  | 733.859863 | 2 | 15 | 17.7457 | 38.55 |
| 1 | 103.53 | 103.53 | 78.6 | DNM1L_FlexII | 99.0 | IFSPNVNLLTVDLPGMTK        | Oxidation(M) @17; Label:13C(6)15N(2)(K) @19                                                 |                | -0.00192752 | 2081.1294  | 1041.572 | 2081.13232 | 1041.57336 | 2 | 22 | 19.7458 | 38.55 |
| 1 | 103.53 | 103.53 | 78.6 | DNM1L_FlexII | 99.0 | IFSPNVNLLTVDLPGMTK        | Oxidation(M) @17; Label:13C(6)15N(2)(K) @19                                                 |                | -0.0024158  | 2081.1294  | 1041.572 | 2081.13232 | 1041.57336 | 2 | 21 | 19.7685 | 38.55 |
| 1 | 103.53 | 10     |      |              |      |                           |                                                                                             |                |             |            |          |            |            |   |    |         |       |

|   |        |        |      |              |      |                         |                                                                                                                   |                                  |             |            |            |            |            |    |         |         |       |
|---|--------|--------|------|--------------|------|-------------------------|-------------------------------------------------------------------------------------------------------------------|----------------------------------|-------------|------------|------------|------------|------------|----|---------|---------|-------|
| 1 | 103.53 | 103.53 | 78.6 | DNM1L_FlexII | 99.0 | IFSPNV/VNLT/LVDPGMTK    | Label: 13C(6)15N(2)(K) @ 19                                                                                       | -0.00586014                      | 2065.13135  | 1033.573   | 2065.13721 | 1033.57593 | 2          | 16 | 20.3627 | 38.55   |       |
| 1 | 103.53 | 103.53 | 78.6 | DNM1L_FlexII | 99.0 | IFSPNV/VNLT/LVDPGMTK    | Deamidated(N) @ 5; Label: 13C(6)15N(2)(K) @ 19                                                                    | 0.00793125                       | 2066.1294   | 1034.072   | 2066.12134 | 1034.06799 | 2          | 14 | 20.7379 | 38.55   |       |
| 1 | 103.53 | 103.53 | 78.6 | DNM1L_FlexII | 99.0 | IIQHCSNSTQELLR          | Propionamide(C) @ 5; Label: 13C(6)15N(4)(R) @ 15                                                                  | 0.00157396                       | 1884.94092  | 629.3209   | 1884.93921 | 629.320313 | 3          | 20 | 16.3514 | 38.55   |       |
| 1 | 103.53 | 103.53 | 78.6 | DNM1L_FlexII | 99.0 | IIQHCSNSTQELLR          | Propionamide(C) @ 5; Label: 13C(6)15N(4)(R) @ 15                                                                  | 0.00939325                       | 1884.94873  | 943.4816   | 1884.93921 | 943.476868 | 2          | 23 | 16.4055 | 38.55   |       |
| 1 | 103.53 | 103.53 | 78.6 | DNM1L_FlexII | 99.0 | IIQHCSNSTQELLR          | Propionamide(C) @ 5; Deamidated(N) @ 7; Label: 13C(6)15N(4)(R) @ 15                                               | 0.0356291                        | 1885.95886  | 629.6602   | 1885.92322 | 629.648315 | 3          | 13 | 16.3439 | 38.55   |       |
| 1 | 103.53 | 103.53 | 78.6 | DNM1L_FlexII | 99.0 | KNIQDSVPK               | Label: 13C(6)15N(2)(K) @ 1; Label: 13C(6)15N(2)(K) @ 9                                                            | -0.00962196                      | 1043.58484  | 522.7997   | 1043.5946  | 522.804565 | 2          | 14 | 14.1513 | 38.55   |       |
| 1 | 103.53 | 103.53 | 78.6 | DNM1L_FlexII | 99.0 | KTTGEENGVEAEWGK         | Label: 13C(6)15N(2)(K) @ 1; Label: 13C(6)15N(2)(K) @ 16                                                           | misses K-N @ 1                   | 0.00146703  | 1778.83093 | 593.9509   | 1778.82935 | 593.950378 | 3  | 20      | 15.4527 | 38.55 |
| 1 | 103.53 | 103.53 | 78.6 | DNM1L_FlexII | 99.0 | KTTGEENGVEAEWGK         | Label: 13C(6)15N(2)(K) @ 1; Deamidated(N) @ 7; Label: 13C(6)15N(2)(K) @ 16                                        | misses K-T @ 1                   | 0.0147159   | 1779.82813 | 890.9213   | 1779.81335 | 890.91394  | 2  | 26      | 15.5456 | 38.55 |
| 1 | 103.53 | 103.53 | 78.6 | DNM1L_FlexII | 99.0 | LDLMDAGTDAMDVLGR        | Oxidation(M) @ 11; Label: 13C(6)15N(4)(R) @ 17                                                                    | -0.00405943                      | 1848.82544  | 925.42     | 1848.82947 | 925.422058 | 2          | 22 | 20.1972 | 38.55   |       |
| 1 | 103.53 | 103.53 | 78.6 | DNM1L_FlexII | 99.0 | LDLMDAGTDAMDVLGR        | Oxidation(M) @ 15; Label: 13C(6)15N(4)(R) @ 17                                                                    | -0.00405943                      | 1848.82544  | 925.42     | 1848.82947 | 925.422058 | 2          | 21 | 20.2049 | 38.55   |       |
| 1 | 103.53 | 103.53 | 78.6 | DNM1L_FlexII | 99.0 | LDLMDAGTDAMDVLGR        | Label: 13C(6)15N(4)(R) @ 17                                                                                       | -0.00506236                      | 1832.82971  | 917.4221   | 1832.8346  | 917.424561 | 2          | 22 | 20.4692 | 38.55   |       |
| 1 | 103.53 | 103.53 | 78.6 | DNM1L_FlexII | 99.0 | LDLMDAGTDAMDVLGR        | Label: 13C(6)15N(4)(R) @ 17                                                                                       | -0.00506236                      | 1832.82971  | 917.4221   | 1832.8346  | 917.424561 | 2          | 21 | 20.4743 | 38.55   |       |
| 1 | 103.53 | 103.53 | 78.6 | DNM1L_FlexII | 99.0 | LDLMDAGTDAMDVLGR        | Label: 13C(6)15N(4)(R) @ 17                                                                                       | -0.00506236                      | 1832.82971  | 917.4221   | 1832.8346  | 917.424561 | 2          | 20 | 20.4995 | 38.55   |       |
| 1 | 103.53 | 103.53 | 78.6 | DNM1L_FlexII | 99.0 | LDLMDAGTDAMDVLGR        | Label: 13C(6)15N(4)(R) @ 17                                                                                       | -0.00592361                      | 1832.82874  | 611.9502   | 1832.8346  | 611.952148 | 3          | 24 | 20.5579 | 38.55   |       |
| 1 | 103.53 | 103.53 | 78.6 | DNM1L_FlexII | 99.0 | LDLMDAGTDAMDVLGR        | Label: 13C(6)15N(4)(R) @ 17                                                                                       | -0.00501469                      | 1822.82153  | 912.418    | 1822.82629 | 912.420471 | 2          | 20 | 20.5858 | 38.55   |       |
| 1 | 103.53 | 103.53 | 78.6 | DNM1L_FlexII | 99.0 | LDLMDAGTDAMDVLGR        | Label: 13C(6)15N(4)(R) @ 17                                                                                       | -0.00683914                      | 1832.82788  | 611.9499   | 1832.8346  | 611.952148 | 3          | 19 | 20.6519 | 38.55   |       |
| 1 | 103.53 | 103.53 | 78.6 | DNM1L_FlexII | 99.0 | LDLMDAGTDAMDVLGR        | Label: 13C(6)15N(4)(R) @ 17                                                                                       | -0.00628306                      | 1832.82825  | 917.4214   | 1832.8346  | 917.424561 | 2          | 19 | 20.985  | 38.55   |       |
| 1 | 103.53 | 103.53 | 78.6 | DNM1L_FlexII | 99.0 | LDLMDAGTDAMDVLGR        | Label: 13C(6)15N(4)(R) @ 17                                                                                       | -0.00329404                      | 1832.8313   | 917.4229   | 1832.8346  | 917.424561 | 2          | 19 | 20.5348 | 38.55   |       |
| 1 | 103.53 | 103.53 | 78.6 | DNM1L_FlexII | 99.0 | LDLMDAGTDAMDVLGR        | Label: 13C(6)15N(4)(R) @ 17                                                                                       | -0.00109675                      | 1832.8335   | 917.424    | 1832.8346  | 917.424561 | 2          | 17 | 20.6061 | 38.55   |       |
| 1 | 103.53 | 103.53 | 78.6 | DNM1L_FlexII | 99.0 | LDLMDAGTDAMDVLGR        | Oxidation(M) @ 11; Label: 13C(6)15N(4)(R) @ 17                                                                    | -0.00112973                      | 1848.82825  | 925.4214   | 1848.82947 | 925.422058 | 2          | 18 | 19.5836 | 38.55   |       |
| 1 | 103.53 | 103.53 | 78.6 | DNM1L_FlexII | 99.0 | LDLMDAGTDAMDVLGR        | Label: 13C(6)15N(4)(R) @ 17                                                                                       | -0.00506236                      | 1832.82971  | 917.4221   | 1832.8346  | 917.424561 | 2          | 18 | 20.5072 | 38.55   |       |
| 1 | 103.53 | 103.53 | 78.6 | DNM1L_FlexII | 99.0 | LDLMDAGTDAMDVLGR        | Label: 13C(6)15N(4)(R) @ 17                                                                                       | -0.00469614                      | 1832.82983  | 917.4222   | 1832.8346  | 917.424561 | 2          | 17 | 20.5351 | 38.55   |       |
| 1 | 103.53 | 103.53 | 78.6 | DNM1L_FlexII | 99.0 | LDLMDAGTDAMDVLGR        | Label: 13C(6)15N(4)(R) @ 17                                                                                       | -0.00628306                      | 1832.82825  | 917.4214   | 1832.8346  | 917.424561 | 2          | 14 | 21.5541 | 38.55   |       |
| 1 | 103.53 | 103.53 | 78.6 | DNM1L_FlexII | 99.0 | LDLMDAGTDAMDVLGR        | Label: 13C(6)15N(4)(R) @ 17                                                                                       | -0.00469614                      | 1832.82983  | 917.4222   | 1832.8346  | 917.424561 | 2          | 16 | 20.5706 | 38.55   |       |
| 1 | 103.53 | 103.53 | 78.6 | DNM1L_FlexII | 99.0 | LDLMDAGTDAMDVLGR        | Label: 13C(6)15N(4)(R) @ 17                                                                                       | -0.00628306                      | 1832.82825  | 917.4214   | 1832.8346  | 917.424561 | 2          | 10 | 26.4708 | 38.55   |       |
| 1 | 103.53 | 103.53 | 78.6 | DNM1L_FlexII | 99.0 | LHDAIVEVTCLLR           | Propionamide(C) @ 11; Label: 13C(6)15N(4)(R) @ 14                                                                 | -0.0074533                       | 1660.91345  | 554.6451   | 1660.92102 | 554.647583 | 3          | 17 | 20.4133 | 38.55   |       |
| 1 | 103.53 | 103.53 | 78.6 | DNM1L_FlexII | 99.0 | LPVTNEMVHNLVAIELAYINTK  | Label: 13C(6)15N(2)(K) @ 22                                                                                       | -0.00699129                      | 2489.33765  | 830.7865   | 2489.34424 | 830.788696 | 3          | 27 | 20.4057 | 38.55   |       |
| 1 | 103.53 | 103.53 | 78.6 | DNM1L_FlexII | 99.0 | LPVTNEMVHNLVAIELAYINTK  | Label: 13C(6)15N(2)(K) @ 22                                                                                       | -0.00480913                      | 2489.3396   | 830.7871   | 2489.34424 | 830.788696 | 3          | 21 | 20.4486 | 38.55   |       |
| 1 | 103.53 | 103.53 | 78.6 | DNM1L_FlexII | 99.0 | LPVTNEMVHNLVAIELAYINTK  | Label: 13C(6)15N(2)(K) @ 22                                                                                       | -0.00480913                      | 2489.3396   | 830.7871   | 2489.34424 | 830.788696 | 3          | 21 | 20.4713 | 38.55   |       |
| 1 | 103.53 | 103.53 | 78.6 | DNM1L_FlexII | 99.0 | LPVTNEMVHNLVAIELAYINTK  | Label: 13C(6)15N(2)(K) @ 22                                                                                       | -0.0068402                       | 2489.33765  | 830.7865   | 2489.34424 | 830.788696 | 3          | 21 | 20.4815 | 38.55   |       |
| 1 | 103.53 | 103.53 | 78.6 | DNM1L_FlexII | 99.0 | LPVTNEMVHNLVAIELAYINTK  | Deamidated(N) @ 10; Label: 13C(6)15N(2)(K) @ 22                                                                   | 0.0130816                        | 2490.34155  | 831.1211   | 2490.32837 | 831.116699 | 3          | 17 | 20.3829 | 38.55   |       |
| 1 | 103.53 | 103.53 | 78.6 | DNM1L_FlexII | 99.0 | LPVTNEMVHNLVAIELAYINTK  | Label: 13C(6)15N(2)(K) @ 22                                                                                       | -0.00614197                      | 2489.33814  | 830.7867   | 2489.34424 | 830.788696 | 3          | 16 | 20.4489 | 38.55   |       |
| 1 | 103.53 | 103.53 | 78.6 | DNM1L_FlexII | 99.0 | LPVTNEMVHNLVAIELAYINTK  | Deamidated(N) @ 10; Label: 13C(6)15N(2)(K) @ 22                                                                   | 0.043111                         | 2490.37158  | 831.1311   | 2490.32837 | 831.116699 | 3          | 13 | 26.6363 | 38.55   |       |
| 1 | 103.53 | 103.53 | 78.6 | DNM1L_FlexII | 99.0 | LPVTNEMVHNLVAIELAYINTK  | Deamidated(N) @ 10; Label: 13C(6)15N(2)(K) @ 22                                                                   | 0.00349226                       | 2490.33179  | 623.5902   | 2490.32837 | 623.589356 | 4          | 14 | 20.4615 | 38.55   |       |
| 1 | 103.53 | 103.53 | 78.6 | DNM1L_FlexII | 99.0 | LYTDFDEIRQEIENETER      | Label: 13C(6)15N(4)(R) @ 9; Label: 13C(6)15N(4)(R) @ 18                                                           | misses R-Q @ 9                   | -0.00616976 | 2319.0708  | 774.0309   | 2319.0769  | 774.032959 | 3  | 12      | 18.9786 | 38.55 |
| 1 | 103.53 | 103.53 | 78.6 | DNM1L_FlexII | 99.0 | NVASGGGGVGDGVQEPPTGNWR  | Label: 13C(6)15N(4)(R) @ 22                                                                                       | 0.00362064                       | 2123.98926  | 1063.002   | 2123.98608 | 1063.00024 | 2          | 34 | 16.359  | 38.55   |       |
| 1 | 103.53 | 103.53 | 78.6 | DNM1L_FlexII | 99.0 | NVASGGGGVGDGVQEPPTGNWR  | Label: 13C(6)15N(4)(R) @ 22                                                                                       | 0.00508549                       | 2123.99146  | 1063.003   | 2123.98608 | 1063.00024 | 2          | 35 | 16.3807 | 38.55   |       |
| 1 | 103.53 | 103.53 | 78.6 | DNM1L_FlexII | 99.0 | NVASGGGGVGDGVQEPPTGNWR  | Label: 13C(6)15N(4)(R) @ 22                                                                                       | 0.00508549                       | 2123.99146  | 1063.003   | 2123.98608 | 1063.00024 | 2          | 33 | 16.3856 | 38.55   |       |
| 1 | 103.53 | 103.53 | 78.6 | DNM1L_FlexII | 99.0 | NVASGGGGVGDGVQEPPTGNWR  | Label: 13C(6)15N(4)(R) @ 22                                                                                       | 0.0063062                        | 2123.99146  | 1063.003   | 2123.98608 | 1063.00024 | 2          | 32 | 16.4127 | 38.55   |       |
| 1 | 103.53 | 103.53 | 78.6 | DNM1L_FlexII | 99.0 | NVASGGGGVGDGVQEPPTGNWR  | Deamidated(Q) @ 14; Label: 13C(6)15N(4)(R) @ 22                                                                   | 0.0299786                        | 2125        | 709.3406   | 2124.96997 | 709.330627 | 3          | 16 | 16.4403 | 38.55   |       |
| 1 | 103.53 | 103.53 | 78.6 | DNM1L_FlexII | 99.0 | RLPVTNEMVHNLVAIELAYINTK | Label: 13C(6)15N(4)(R) @ 1; Deamidated(N) @ 11; Label: 13C(6)15N(2)(K) @ 23                                       | misses R-L @ 1                   | 0.0143924   | 2656.4519  | 886.4913   | 2656.43774 | 886.486511 | 3  | 18      | 20.1007 | 38.55 |
| 1 | 103.53 | 103.53 | 78.6 | DNM1L_FlexII | 99.0 | RLPVTNEMVHNLVAIELAYINTK | Label: 13C(6)15N(4)(R) @ 1; Label: 13C(6)15N(2)(K) @ 23                                                           | -0.0012978                       | 2655.45264  | 664.8704   | 2655.45264 | 664.870728 | 4          | 17 | 20.1032 | 38.55   |       |
| 1 | 103.53 | 103.53 | 78.6 | DNM1L_FlexII | 99.0 | RLPVTNEMVHNLVAIELAYINTK | Label: 13C(6)15N(4)(R) @ 1; Deamidated(N) @ 11; Label: 13C(6)15N(2)(K) @ 23                                       | misses R-L @ 1                   | 0.0146909   | 2656.45264 | 665.1204   | 2656.43774 | 665.116699 | 4  | 16      | 20.0855 | 38.55 |
| 1 | 103.53 | 103.53 | 78.6 | DNM1L_FlexII | 99.0 | RPLILQLVHSVQEDK         | Label: 13C(6)15N(4)(R) @ 1; Label: 13C(6)15N(2)(K) @ 15                                                           | -0.00418244                      | 1792.02844  | 598.3501   | 1792.03259 | 598.351502 | 3          | 21 | 17.7657 | 38.55   |       |
| 1 | 103.53 | 103.53 | 78.6 | DNM1L_FlexII | 99.0 | RPLILQLVHSVQEDK         | Label: 13C(6)15N(4)(R) @ 1; Label: 13C(6)15N(2)(K) @ 15                                                           | 2.90E-05                         | 1792.03272  | 598.3515   | 1792.03259 | 598.351502 | 3          | 19 | 17.7951 | 38.55   |       |
| 1 | 103.53 | 103.53 | 78.6 | DNM1L_FlexII | 99.0 | RPLILQLVHSVQEDK         | Label: 13C(6)15N(4)(R) @ 1; Label: 13C(6)15N(2)(K) @ 15                                                           | 0.0032096                        | 1792.03565  | 897.0251   | 1792.03259 | 897.02356  | 2          | 19 | 17.8924 | 38.55   |       |
| 1 | 103.53 | 103.53 | 78.6 | DNM1L_FlexII | 99.0 | RPLILQLVHSVQEDK         | Label: 13C(6)15N(4)(R) @ 1; Label: 13C(6)15N(2)(K) @ 15                                                           | -0.0002219                       | 1792.03259  | 449.0154   | 1792.03259 | 449.015411 | 4          | 14 | 17.8221 | 38.55   |       |
| 1 | 103.53 | 103.53 | 78.6 | DNM1L_FlexII | 99.0 | RPLILQLVHSVQEDK         | Label: 13C(6)15N(4)(R) @ 1; Label: 13C(6)15N(2)(K) @ 15                                                           | -0.00058811                      | 1792.0321   | 449.0153   | 1792.03259 | 449.015411 | 4          | 14 | 17.8544 | 38.55   |       |
| 1 | 103.53 | 103.53 | 78.6 | DNM1L_FlexII | 99.0 | RPLILQLVHSVQEDK         | Label: 13C(6)15N(4)(R) @ 1; Label: 13C(6)15N(2)(K) @ 15                                                           | -0.00058811                      | 1792.0321   | 449.0153   | 1792.03259 | 449.015411 | 4          | 14 | 17.8771 | 38.55   |       |
| 1 | 103.53 | 103.53 | 78.6 | DNM1L_FlexII | 99.0 | RPLILQLVHSVQEDK         | Label: 13C(6)15N(4)(R) @ 1; Label: 13C(6)15N(2)(K) @ 15                                                           | -0.00418244                      | 1792.02844  | 598.3501   | 1792.03259 | 598.351502 | 3          | 13 | 26.6872 | 38.55   |       |
| 1 | 103.53 | 103.53 | 78.6 | DNM1L_FlexII | 99.0 | RPLILQLVHSVQEDKR        | Label: 13C(6)15N(4)(R) @ 1; Label: 13C(6)15N(2)(K) @ 15; Label: 13C(6)15N(4)(R) @ 16                              | -0.00287157                      | 1958.13904  | 653.7203   | 1958.14197 | 653.721252 | 3          | 21 | 17.3205 | 38.55   |       |
| 1 | 103.53 | 103.53 | 78.6 | DNM1L_FlexII | 99.0 | RPLILQLVHSVQEDKR        | Label: 13C(6)15N(4)(R) @ 1; Label: 13C(6)15N(2)(K) @ 15; Label: 13C(6)15N(4)(R) @ 16                              | 0.017867                         | 1958.16016  | 392.6393   | 1958.14197 | 392.635681 | 5          | 13 | 17.3724 | 38.55   |       |
| 1 | 103.53 | 103.53 | 78.6 | DNM1L_FlexII | 99.0 | RPLILQLVHSVQEDKR        | Label: 13C(6)15N(4)(R) @ 1; Deamidated(Q) @ 6; Label: 13C(6)15N(2)(K) @ 15; Label: 13C(6)15N(4)(R) @ 16           | misses K-R @ 15                  | 0.00352779  | 1959.1294  | 490.7896   | 1959.12598 | 490.788757 | 4  | 14      | 17.2836 | 38.55 |
| 1 | 103.53 | 103.53 | 78.6 | DNM1L_FlexII | 99.0 | RPLILQLVHSVQEDKR        | Label: 13C(6)15N(4)(R) @ 1; Label: 13C(6)15N(2)(K) @ 15; Label: 13C(6)15N(4)(R) @ 16                              | -0.00364802                      | 1958.13806  | 392.6349   | 1958.14197 | 392.635681 | 5          | 10 | 17.4707 | 38.55   |       |
| 1 | 103.53 | 103.53 | 78.6 | DNM1L_FlexII | 99.0 | RPLILQLVHSVQEDKRK       | Label: 13C(6)15N(4)(R) @ 1; Label: 13C(6)15N(2)(K) @ 15; Label: 13C(6)15N(4)(R) @ 16; Label: 13C(6)15N(2)(K) @ 17 | misses K-R @ 15; misses R-K @ 16 | 0.00913649  | 2094.26025 | 419.8593   | 2094.25122 | 419.857513 | 5  | 12      | 16.9282 | 38.55 |
| 1 | 103.53 | 103.53 | 78.6 | DNM1L_FlexII | 99.0 | SATLLQLITK              | Label:                                                                                                            |                                  |             |            |            |            |            |    |         |         |       |

|   |        |        |      |                 |      |                                   |                                                                                                     |               |            |            |            |            |            |    |         |         |       |
|---|--------|--------|------|-----------------|------|-----------------------------------|-----------------------------------------------------------------------------------------------------|---------------|------------|------------|------------|------------|------------|----|---------|---------|-------|
| 1 | 103.53 | 103.53 | 78.6 | DNM1L_FlexIII   | 99.0 | SSLLDDLLTESEDMAQR                 | Label: 13C(6)15N(4)(R)@ 17                                                                          | -0.00584866   | 1931.89636 | 644.9727   | 1931.9021  | 644.97467  | 3          | 21 | 20.4361 | 38.55   |       |
| 1 | 103.53 | 103.53 | 78.6 | DNM1L_FlexIII   | 99.0 | SSLLDDLLTESEDMAQR                 | Label: 13C(6)15N(4)(R)@ 17                                                                          | -0.00431602   | 1931.89783 | 966.9562   | 1931.9021  | 966.958374 | 2          | 22 | 20.4386 | 38.55   |       |
| 1 | 103.53 | 103.53 | 78.6 | DNM1L_FlexIII   | 99.0 | SSLLDDLLTESEDMAQR                 | Label: 13C(6)15N(4)(R)@ 17                                                                          | -0.00584866   | 1931.89636 | 644.9727   | 1931.9021  | 644.97467  | 3          | 22 | 20.4463 | 38.55   |       |
| 1 | 103.53 | 103.53 | 78.6 | DNM1L_FlexIII   | 99.0 | SSLLDDLLTESEDMAQR                 | Label: 13C(6)15N(4)(R)@ 17                                                                          | -0.00971777   | 1931.89246 | 966.9535   | 1931.9021  | 966.958374 | 2          | 20 | 20.5018 | 38.55   |       |
| 1 | 103.53 | 103.53 | 78.6 | DNM1L_FlexIII   | 99.0 | SSLLDDLLTESEDMAQR                 | Label: 13C(6)15N(4)(R)@ 17                                                                          | 0.00667035    | 1931.90881 | 966.9617   | 1931.9021  | 966.958374 | 2          | 11 | 26.5294 | 38.55   |       |
| 1 | 103.53 | 103.53 | 78.6 | DNM1L_FlexIII   | 99.0 | SSVLESIVGR                        | Label: 13C(6)15N(4)(R)@ 10                                                                          | -6.65E-06     | 1055.58508 | 528.7998   | 1055.58508 | 528.799805 | 2          | 13 | 18.3355 | 38.55   |       |
| 1 | 103.53 | 103.53 | 78.6 | DNM1L_FlexIII   | 99.0 | SSVLESIVGR                        | Label: 13C(6)15N(4)(R)@ 10                                                                          | 0.00060371    | 1055.58569 | 528.8001   | 1055.58508 | 528.799805 | 2          | 12 | 18.8192 | 38.55   |       |
| 1 | 103.53 | 103.53 | 78.6 | DNM1L_FlexIII   | 99.0 | SSVLESIVGR                        | Label: 13C(6)15N(4)(R)@ 10                                                                          | -6.65E-06     | 1055.58508 | 528.7998   | 1055.58508 | 528.799805 | 2          | 12 | 18.3052 | 38.55   |       |
| 1 | 103.53 | 103.53 | 78.6 | DNM1L_FlexIII   | 99.0 | SVTDSIRDEYAFLOK                   | Label: 13C(6)15N(4)(R)@ 7; Label: 13C(6)15N(2)(K)@ 15                                               | 0.00228312    | 1788.90344 | 895.459    | 1788.90125 | 895.457947 | 2          | 14 | 17.9701 | 38.55   |       |
| 1 | 103.53 | 103.53 | 78.6 | DNM1L_FlexIII   | 99.0 | TLESVDPLGGLNTIDILTAIR             | Label: 13C(6)15N(4)(R)@ 21                                                                          | -0.00336277   | 2220.22144 | 1111.118   | 2220.22412 | 1111.11926 | 2          | 29 | 20.4412 | 38.55   |       |
| 1 | 103.53 | 103.53 | 78.6 | DNM1L_FlexIII   | 99.0 | TLESVDPLGGLNTIDILTAIR             | Label: 13C(6)15N(4)(R)@ 21                                                                          | -0.00336277   | 2220.22144 | 1111.118   | 2220.22412 | 1111.11926 | 2          | 30 | 20.4438 | 38.55   |       |
| 1 | 103.53 | 103.53 | 78.6 | DNM1L_FlexIII   | 99.0 | TLESVDPLGGLNTIDILTAIR             | Label: 13C(6)15N(4)(R)@ 21                                                                          | -0.00336277   | 2220.22144 | 1111.118   | 2220.22412 | 1111.11926 | 2          | 31 | 20.4666 | 38.55   |       |
| 1 | 103.53 | 103.53 | 78.6 | DNM1L_FlexIII   | 99.0 | TLESVDPLGGLNTIDILTAIR             | Label: 13C(6)15N(4)(R)@ 21                                                                          | -0.00611612   | 2220.21826 | 741.08     | 2220.22412 | 741.08197  | 3          | 30 | 20.4921 | 38.55   |       |
| 1 | 103.53 | 103.53 | 78.6 | DNM1L_FlexIII   | 99.0 | TLESVDPLGGLNTIDILTAIR             | Label: 13C(6)15N(4)(R)@ 21                                                                          | -0.00336277   | 2220.22144 | 1111.118   | 2220.22412 | 1111.11926 | 2          | 29 | 20.4946 | 38.55   |       |
| 1 | 103.53 | 103.53 | 78.6 | DNM1L_FlexIII   | 99.0 | TLESVDPLGGLNTIDILTAIR             | Label: 13C(6)15N(4)(R)@ 21                                                                          | -0.00648234   | 2220.21753 | 741.0798   | 2220.22412 | 741.08197  | 3          | 30 | 20.5046 | 38.55   |       |
| 1 | 103.53 | 103.53 | 78.6 | DNM1L_FlexIII   | 99.0 | TLESVDPLGGLNTIDILTAIR             | Label: 13C(6)15N(4)(R)@ 21                                                                          | -0.00648234   | 2220.21753 | 741.0798   | 2220.22412 | 741.08197  | 3          | 29 | 20.5149 | 38.55   |       |
| 1 | 103.53 | 103.53 | 78.6 | DNM1L_FlexIII   | 99.0 | TLESVDPLGGLNTIDILTAIR             | Label: 13C(6)15N(4)(R)@ 21                                                                          | -0.00336277   | 2220.22144 | 1111.118   | 2220.22412 | 1111.11926 | 2          | 26 | 20.5428 | 38.55   |       |
| 1 | 103.53 | 103.53 | 78.6 | DNM1L_FlexIII   | 99.0 | TLESVDPLGGLNTIDILTAIR             | Label: 13C(6)15N(4)(R)@ 21                                                                          | -0.00703166   | 2220.21729 | 741.0797   | 2220.22412 | 741.08197  | 3          | 29 | 20.5454 | 38.55   |       |
| 1 | 103.53 | 103.53 | 78.6 | DNM1L_FlexIII   | 99.0 | TLESVDPLGGLNTIDILTAIR             | Label: 13C(6)15N(4)(R)@ 21                                                                          | -0.014105     | 2220.20947 | 1111.112   | 2220.22412 | 1111.11926 | 2          | 20 | 21.0002 | 38.55   |       |
| 1 | 103.53 | 103.53 | 78.6 | DNM1L_FlexIII   | 99.0 | TLESVDPLGGLNTIDILTAIR             | Deamidated(N)@ 12; Label: 13C(6)15N(4)(R)@ 21                                                       | 0.0274116     | 2221.23535 | 1111.625   | 2221.20801 | 1111.61133 | 2          | 20 | 20.5323 | 38.55   |       |
| 1 | 103.53 | 103.53 | 78.6 | DNM1L_FlexIII   | 99.0 | TLESVDPLGGLNTIDILTAIR             | Label: 13C(6)15N(4)(R)@ 21                                                                          | 0.0114164     | 2220.23535 | 1111.125   | 2220.22412 | 1111.11926 | 2          | 20 | 20.5628 | 38.55   |       |
| 1 | 103.53 | 103.53 | 78.6 | DNM1L_FlexIII   | 99.0 | TLESVDPLGGLNTIDILTAIR             | Label: 13C(6)15N(4)(R)@ 21                                                                          | -0.00446817   | 2220.21973 | 741.0805   | 2220.22412 | 741.08197  | 3          | 17 | 20.6925 | 38.55   |       |
| 1 | 103.53 | 103.53 | 78.6 | DNM1L_FlexIII   | 99.0 | TLESVDPLGGLNTIDILTAIR             | Deamidated(N)@ 12; Label: 13C(6)15N(4)(R)@ 21                                                       | 0.0219033     | 2221.22925 | 1111.622   | 2221.20801 | 1111.61133 | 2          | 16 | 20.9901 | 38.55   |       |
| 1 | 103.53 | 103.53 | 78.6 | DNM1L_FlexIII   | 99.0 | TLESVDPLGGLNTIDILTAIR             | Label: 13C(6)15N(4)(R)@ 21                                                                          | 0.00591461    | 2220.22925 | 1111.122   | 2220.22412 | 1111.11926 | 2          | 11 | 21.5432 | 38.55   |       |
| 1 | 103.53 | 103.53 | 78.6 | DNM1L_FlexIII   | 99.0 | TSKAELLAEEK                       | Label: 13C(6)15N(2)(K)@ 3; Label: 13C(6)15N(2)(K)@ 12                                               | 0.00149134    | 1362.7229  | 682.3687   | 1362.72131 | 682.36792  | 2          | 21 | 15.7653 | 38.55   |       |
| 1 | 103.53 | 103.53 | 78.6 | DNM1L_FlexIII   | 99.0 | TSKAELLAEEK                       | Label: 13C(6)15N(2)(K)@ 3; Label: 13C(6)15N(2)(K)@ 12                                               | misses K-A@ 3 | 0.00532981 | 1362.72669 | 455.2495   | 1362.72131 | 455.247711 | 3  | 15      | 15.7627 | 38.55 |
| 1 | 103.53 | 103.53 | 78.6 | DNM1L_FlexIII   | 99.0 | TTGEENGVEAEEWGK                   | Label: 13C(6)15N(2)(K)@ 15                                                                          | misses K-A@ 3 | 0.00330725 | 1642.72351 | 822.369    | 1642.72022 | 822.367371 | 2  | 21      | 16.108  | 38.55 |
| 1 | 103.53 | 103.53 | 78.6 | DNM1L_FlexIII   | 99.0 | TTGEENGVEAEEWGK                   | Label: 13C(6)15N(2)(K)@ 15                                                                          | 0.00330725    | 1642.72351 | 822.369    | 1642.72022 | 822.367371 | 2          | 18 | 16.1257 | 38.55   |       |
| 1 | 103.53 | 103.53 | 78.6 | DNM1L_FlexIII   | 99.0 | TTGEENGVEAEEWGK                   | Deamidated(N)@ 6; Label: 13C(6)15N(2)(K)@ 15                                                        | 0.0103847     | 1643.71472 | 822.8646   | 1643.70422 | 822.859375 | 2          | 18 | 16.1806 | 38.55   |       |
| 1 | 103.53 | 103.53 | 78.6 | DNM1L_FlexIII   | 99.0 | YIETSELGGGAR                      | Propionamide(C)@ 8; Label: 13C(6)15N(4)(R)@ 12                                                      | 0.00175749    | 1378.64453 | 690.3295   | 1378.64258 | 690.328613 | 2          | 16 | 16.0474 | 38.55   |       |
| 1 | 103.53 | 103.53 | 78.6 | DNM1L_FlexIII   | 99.0 | YIETSELGGGAR                      | Propionamide(C)@ 8; Label: 13C(6)15N(4)(R)@ 12                                                      | 0.00175749    | 1378.64453 | 690.3295   | 1378.64258 | 690.328613 | 2          | 14 | 16.0752 | 38.55   |       |
| 1 | 103.53 | 103.53 | 78.6 | DNM1L_FlexIII   | 99.0 | YIETSELGGGAR                      | Propionamide(C)@ 8; Label: 13C(6)15N(4)(R)@ 12                                                      | 0.00224578    | 1378.6449  | 690.3297   | 1378.64258 | 690.328613 | 2          | 12 | 16.1156 | 38.55   |       |
| 2 | 66.08  | 66.08  | 40.2 | RPS6KA1_FlexIII | 99.0 | ADPSHFELK                         | Label: 13C(6)15N(2)(K)@ 10                                                                          | 0.0007224     | 1163.60742 | 582.811    | 1163.60657 | 582.810608 | 2          | 13 | 19.6169 | 114.74  |       |
| 2 | 66.08  | 66.08  | 40.2 | RPS6KA1_FlexIII | 99.0 | AENGLLMTPCYTANFVAPEVLK            | Deamidated(N)@ 3; Propionamide(C)@ 10; Label: 13C(6)15N(2)(K)@ 22                                   | 0.00806235    | 2460.22339 | 1231.119   | 2460.21606 | 1231.11523 | 2          | 21 | 19.5993 | 114.74  |       |
| 2 | 66.08  | 66.08  | 40.2 | RPS6KA1_FlexIII | 99.0 | APQAPHSHVVOQLHGK                  | Label: 13C(6)15N(2)(K)@ 16                                                                          | 0.00197172    | 1716.95337 | 573.3251   | 1716.95154 | 573.324463 | 3          | 16 | 16.2317 | 114.74  |       |
| 2 | 66.08  | 66.08  | 40.2 | RPS6KA1_FlexIII | 99.0 | ATNMEYAVK                         | Label: 13C(6)15N(2)(K)@ 9                                                                           | -0.0010879    | 1033.49829 | 517.7564   | 1033.49939 | 517.756958 | 2          | 10 | 15.2674 | 114.74  |       |
| 2 | 66.08  | 66.08  | 40.2 | RPS6KA1_FlexIII | 99.0 | DILADVNHFPVVK                     | Label: 13C(6)15N(2)(K)@ 13                                                                          | 0.0024934     | 1473.80969 | 737.9121   | 1473.80713 | 737.910828 | 2          | 19 | 18.0761 | 114.74  |       |
| 2 | 66.08  | 66.08  | 40.2 | RPS6KA1_FlexIII | 99.0 | DKLPQSQLSHQDLQLVK                 | Label: 13C(6)15N(2)(K)@ 2; Label: 13C(6)15N(2)(K)@ 17                                               | 0.00211039    | 1992.09973 | 665.0405   | 1992.09753 | 665.039795 | 3          | 15 | 16.3235 | 114.74  |       |
| 2 | 66.08  | 66.08  | 40.2 | RPS6KA1_FlexIII | 99.0 | DKLPENILLDEEGHK                   | Label: 13C(6)15N(2)(K)@ 3; Label: 13C(6)15N(2)(K)@ 16                                               | 0.00185725    | 1878.00879 | 627.0102   | 1878.00896 | 627.009583 | 3          | 19 | 17.6683 | 114.74  |       |
| 2 | 66.08  | 66.08  | 40.2 | RPS6KA1_FlexIII | 99.0 | DKPSNMLYVDESNGPECLR               | Label: 13C(6)15N(2)(K)@ 3; Deamidated(N)@ 15; Propionamide(C)@ 18; Label: 13C(6)15N(4)(R)@ 20       | 0.0290265     | 2351.17236 | 784.7314   | 2351.14331 | 784.721741 | 3          | 14 | 17.8278 | 114.74  |       |
| 2 | 66.08  | 66.08  | 40.2 | RPS6KA1_FlexIII | 99.0 | DPSEEIEILLR                       | Label: 13C(6)15N(4)(R)@ 11                                                                          | -0.00765481   | 1322.68811 | 662.3513   | 1322.69568 | 662.355164 | 2          | 15 | 19.8349 | 114.74  |       |
| 2 | 66.08  | 66.08  | 40.2 | RPS6KA1_FlexIII | 99.0 | DSGPGPSAGAHQLFR                   | Label: 13C(6)15N(4)(R)@ 16                                                                          | -0.0133358    | 1658.8269  | 553.9496   | 1658.84045 | 553.954102 | 3          | 12 | 17.3203 | 114.74  |       |
| 2 | 66.08  | 66.08  | 40.2 | RPS6KA1_FlexIII | 99.0 | EIKPPFKPAVAQPDFTFYDTEFTSR         | Label: 13C(6)15N(2)(K)@ 3; Label: 13C(6)15N(2)(K)@ 7; Deamidated(Q)@ 12; Label: 13C(6)15N(4)(R)@ 26 | 0.0395228     | 3072.53662 | 769.1414   | 3072.49658 | 769.13147  | 4          | 12 | 18.3625 | 114.74  |       |
| 2 | 66.08  | 66.08  | 40.2 | RPS6KA1_FlexIII | 99.0 | EPWPLMLVPLDPENGQTSGEAGLOPSKDEGVLK | Deamidated(N)@ 15; Label: 13C(6)15N(2)(K)@ 29; Label: 13C(6)15N(2)(K)@ 35                           | -0.00402746   | 3805.85327 | 1269.625   | 3805.85791 | 1269.62659 | 3          | 21 | 20.1453 | 114.74  |       |
| 2 | 66.08  | 66.08  | 40.2 | RPS6KA1_FlexIII | 99.0 | ETIGVGSYSECKR                     | Propionamide(C)@ 11; Label: 13C(6)15N(2)(K)@ 12; Label: 13C(6)15N(4)(R)@ 13                         | -0.00314819   | 1516.72791 | 759.3712   | 1516.73108 | 759.372803 | 2          | 17 | 15.2196 | 114.74  |       |
| 2 | 66.08  | 66.08  | 40.2 | RPS6KA1_FlexIII | 99.0 | ETMTLLIK                          | Label: 13C(6)15N(2)(K)@ 8                                                                           | -0.00683476   | 955.543457 | 478.779    | 955.550354 | 478.78244  | 2          | 8  | 17.7619 | 114.74  |       |
| 2 | 66.08  | 66.08  | 40.2 | RPS6KA1_FlexIII | 99.0 | FTLSSGNWNTVSETAK                  | Label: 13C(6)15N(2)(K)@ 16                                                                          | 0.00519017    | 1718.8407  | 860.4276   | 1718.83557 | 860.425049 | 2          | 18 | 17.7543 | 114.74  |       |
| 2 | 66.08  | 66.08  | 40.2 | RPS6KA1_FlexIII | 99.0 | GFSFVATGLMEDDGKPR                 | Label: 13C(6)15N(2)(K)@ 15; Label: 13C(6)15N(4)(R)@ 17                                              | 0.00919341    | 1843.89844 | 615.6401   | 1843.8894  | 615.637085 | 3          | 15 | 18.3549 | 114.74  |       |
| 2 | 66.08  | 66.08  | 40.2 | RPS6KA1_FlexIII | 99.0 | HVVFYSTIDWNK                      | Label: 13C(6)15N(2)(K)@ 11                                                                          | -0.00083888   | 1416.69104 | 473.2376   | 1416.69177 | 473.237854 | 3          | 11 | 17.2316 | 114.74  |       |
| 2 | 66.08  | 66.08  | 40.2 | RPS6KA1_FlexIII | 99.0 | HVYLVTLMR                         | Label: 13C(6)15N(4)(R)@ 10                                                                          | 0.00169095    | 1269.67944 | 635.847    | 1269.67786 | 635.846252 | 2          | 15 | 18.0154 | 114.74  |       |
| 2 | 66.08  | 66.08  | 40.2 | RPS6KA1_FlexIII | 99.0 | ICDFGFAK                          | Propionamide(C)@ 2; Label: 13C(6)15N(2)(K)@ 8                                                       | 0.00046024    | 978.4729   | 490.2437   | 978.472412 | 490.24325  | 2          | 9  | 17.4111 | 114.74  |       |
| 2 | 66.08  | 66.08  | 40.2 | RPS6KA1_FlexIII | 99.0 | KETMTLLIK                         | Label: 13C(6)15N(2)(K)@ 1; Label: 13C(6)15N(2)(K)@ 9                                                | 0.00512689    | 1091.66467 | 546.8396   | 1091.65955 | 546.837036 | 2          | 13 | 16.8464 | 114.74  |       |
| 2 | 66.08  | 66.08  | 40.2 | RPS6KA1_FlexIII | 99.0 | KYTRPDSGHLAYAMK                   | Label: 13C(6)15N(2)(K)@ 1; Label: 13C(6)15N(4)(R)@ 4; Label: 13C(6)15N(2)(K)@ 14                    | 0.0134022     | 1627.88489 | 407.9785   | 1627.87146 | 407.975128 | 4          | 11 | 14.3753 | 114.74  |       |
| 2 | 66.08  | 66.08  | 40.2 | RPS6KA1_FlexIII | 99.0 | LGMFPQLSTEAQSLLR                  | Label: 13C(6)15N(4)(R)@ 16                                                                          | -0.00575468   | 1799.94202 | 900.9783   | 1799.94788 | 900.981262 | 2          | 17 | 20.3231 | 114.74  |       |
| 2 | 66.08  | 66.08  | 40.2 | RPS6KA1_FlexIII | 99.0 | LGSSPDGAEEIKR                     | Label: 13C(6)15N(2)(K)@ 12; Label: 13C(6)15N(4)(R)@ 13                                              | -0.0110448    | 1345.68457 | 449.5688   | 1345.69568 | 449.57251  | 3          | 12 | 14.3074 | 114.74  |       |
| 2 | 66.08  | 66.08  | 40.2 | RPS6KA1_FlexIII | 99.0 | LTFDGLSK                          | Label: 13C(6)15N(2)(K)@ 8                                                                           | -0.00139497   | 887.483093 | 444.7488   | 887.484375 | 444.749481 | 2          | 10 | 16.8564 | 114.74  |       |
| 2 | 66.08  | 66.08  | 40.2 | RPS6KA1_FlexIII | 99.0 | MLHVDPHQR                         | Label: 13C(6)15N(4)(R)@ 9                                                                           | -0.00483525   | 1141.56421 | 381.5287   | 1141.56897 | 381.530273 | 3          | 11 | 14.013  | 114.74  |       |
| 2 | 66.08  | 66.08  | 40.2 | RPS6KA1_FlexIII | 99.  |                                   |                                                                                                     |               |            |            |            |            |            |    |         |         |       |

|   |       |       |                      |                                    |                                                                                                                                                         |             |            |          |            |            |   |    |         |        |
|---|-------|-------|----------------------|------------------------------------|---------------------------------------------------------------------------------------------------------------------------------------------------------|-------------|------------|----------|------------|------------|---|----|---------|--------|
| 2 | 66.08 | 68.08 | 40.2 RPS6KA1_FlexIII | 99.0 AENGLMTPCYTANFVAPEVLK         | Deamidated(N) @3; Propionamide(C) @10; Label:13C(6)15N(2)(K) @22                                                                                        | 0.00806235  | 2460.22339 | 1231.119 | 2460.21606 | 1231.11523 | 2 | 19 | 19.6147 | 114.74 |
| 2 | 66.08 | 68.08 | 40.2 RPS6KA1_FlexIII | 99.0 APOAPLHSVVQQLHGK              | Label:13C(6)15N(2)(K) @16                                                                                                                               | 0.00197172  | 1716.95337 | 573.3251 | 1716.95154 | 573.324463 | 3 | 17 | 16.2291 | 114.74 |
| 2 | 66.08 | 68.08 | 40.2 RPS6KA1_FlexIII | 99.0 APQAPLHSVVQQLHGK              | Label:13C(6)15N(2)(K) @16                                                                                                                               | 0.00252104  | 1716.9541  | 573.3253 | 1716.95154 | 573.324463 | 3 | 18 | 16.2714 | 114.74 |
| 2 | 66.08 | 68.08 | 40.2 RPS6KA1_FlexIII | 99.0 ATNMEYAVK                     | Label:13C(6)15N(2)(K) @9                                                                                                                                | -0.0002334  | 1033.49902 | 517.7568 | 1033.49939 | 517.756958 | 2 | 10 | 15.3202 | 114.74 |
| 2 | 66.08 | 68.08 | 40.2 RPS6KA1_FlexIII | 99.0 DILADVNHFPVVK                 | Label:13C(6)15N(2)(K) @13                                                                                                                               | 0.00432447  | 1473.81152 | 737.913  | 1473.80713 | 737.910828 | 2 | 20 | 18.1038 | 114.74 |
| 2 | 66.08 | 68.08 | 40.2 RPS6KA1_FlexIII | 99.0 DILADVNHFPVVK                 | Label:13C(6)15N(2)(K) @13                                                                                                                               | 0.00848205  | 1473.81555 | 492.2791 | 1473.80713 | 492.276306 | 3 | 9  | 18.1114 | 114.74 |
| 2 | 66.08 | 68.08 | 40.2 RPS6KA1_FlexIII | 99.0 DKLPQSQLSHQDLQLVK             | Label:13C(6)15N(2)(K) @2; Deamidated(Q) @5; Label:13C(6)15N(2)(K) @17                                                                                   | 0.00815385  | 1993.0896  | 665.3705 | 1993.08154 | 665.367798 | 3 | 14 | 16.3459 | 114.74 |
| 2 | 66.08 | 68.08 | 40.2 RPS6KA1_FlexIII | 99.0 DKLPQSQLSHQDLQLVK             | Label:13C(6)15N(2)(K) @2; Label:13C(6)15N(2)(K) @17                                                                                                     | 0.0024766   | 1992.09998 | 665.0406 | 1992.09753 | 665.039795 | 3 | 14 | 16.3882 | 114.74 |
| 2 | 66.08 | 68.08 | 40.2 RPS6KA1_FlexIII | 99.0 DLKPENILLDEEGHIK              | Label:13C(6)15N(2)(K) @3; Deamidated(N) @6; Label:13C(6)15N(2)(K) @16                                                                                   | 0.0377471   | 1879.02881 | 627.3502 | 1878.99097 | 627.337585 | 3 | 10 | 17.6759 | 114.74 |
| 2 | 66.08 | 68.08 | 40.2 RPS6KA1_FlexIII | 99.0 DPSEIEILLR                    | Label:13C(6)15N(4)(R) @11                                                                                                                               | -0.00570167 | 1322.69006 | 662.3523 | 1322.69568 | 662.355164 | 2 | 15 | 19.5663 | 114.74 |
| 2 | 66.08 | 68.08 | 40.2 RPS6KA1_FlexIII | 99.0 DPSEIEILLR                    | Label:13C(6)15N(4)(R) @11                                                                                                                               | -0.00570167 | 1322.69006 | 662.3523 | 1322.69568 | 662.355164 | 2 | 16 | 19.5688 | 114.74 |
| 2 | 66.08 | 68.08 | 40.2 RPS6KA1_FlexIII | 99.0 DSPGIPPSAGAHQLFR              | Label:13C(6)15N(4)(R) @16                                                                                                                               | -0.0133358  | 1658.8269  | 553.9496 | 1658.84045 | 553.954102 | 3 | 15 | 16.7051 | 114.74 |
| 2 | 66.08 | 68.08 | 40.2 RPS6KA1_FlexIII | 99.0 DSPGIPPSAGAHQLFR              | Label:13C(6)15N(4)(R) @16                                                                                                                               | 0.00167899  | 1658.84229 | 553.9547 | 1658.84045 | 553.954102 | 3 | 15 | 17.2999 | 114.74 |
| 2 | 66.08 | 68.08 | 40.2 RPS6KA1_FlexIII | 99.0 ETIGVGSYSECKR                 | Propionamide(C) @11; Label:13C(6)15N(2)(K) @12; Label:13C(6)15N(4)(R) @13                                                                               | -0.00069961 | 1516.73047 | 506.5841 | 1516.73108 | 506.58429  | 3 | 12 | 15.2145 | 114.74 |
| 2 | 66.08 | 68.08 | 40.2 RPS6KA1_FlexIII | 99.0 ETIGVGSYSECKR                 | Propionamide(C) @11; Label:13C(6)15N(2)(K) @12; Label:13C(6)15N(4)(R) @13                                                                               | -0.00069961 | 1516.73047 | 506.5841 | 1516.73108 | 506.58429  | 3 | 12 | 15.217  | 114.74 |
| 2 | 66.08 | 68.08 | 40.2 RPS6KA1_FlexIII | 99.0 FTLSGGNWTNTVSETAK             | Label:13C(6)15N(2)(K) @16                                                                                                                               | 0.00519017  | 1718.8407  | 860.4276 | 1718.83557 | 860.425049 | 2 | 17 | 17.7442 | 114.74 |
| 2 | 66.08 | 68.08 | 40.2 RPS6KA1_FlexIII | 99.0 HVFYSTIDWNK                   | Label:13C(6)15N(2)(K) @11                                                                                                                               | 0.00339594  | 1416.69531 | 709.3549 | 1416.69177 | 709.353149 | 2 | 18 | 17.1836 | 114.74 |
| 2 | 66.08 | 68.08 | 40.2 RPS6KA1_FlexIII | 99.0 HVFYSTIDWNK                   | Label:13C(6)15N(2)(K) @11                                                                                                                               | 0.00339594  | 1416.69531 | 709.3549 | 1416.69177 | 709.353149 | 2 | 18 | 17.1938 | 114.74 |
| 2 | 66.08 | 68.08 | 40.2 RPS6KA1_FlexIII | 99.0 ICDFGFAK                      | Propionamide(C) @2; Label:13C(6)15N(2)(K) @8                                                                                                            | 0.00460224  | 978.4729   | 490.2437 | 978.472412 | 490.2435   | 2 | 9  | 17.3984 | 114.74 |
| 2 | 66.08 | 68.08 | 40.2 RPS6KA1_FlexIII | 99.0 LGMPQFLSTEAQSLLR              | Label:13C(6)15N(4)(R) @16                                                                                                                               | 0.00217995  | 1799.95007 | 900.9823 | 1799.94788 | 900.981262 | 2 | 17 | 20.219  | 114.74 |
| 2 | 66.08 | 68.08 | 40.2 RPS6KA1_FlexIII | 99.0 LGMPQFLSTEAQSLLR              | Label:13C(6)15N(4)(R) @16                                                                                                                               | -0.00514433 | 1799.94263 | 900.9786 | 1799.94788 | 900.981262 | 2 | 18 | 20.2392 | 114.74 |
| 2 | 66.08 | 68.08 | 40.2 RPS6KA1_FlexIII | 99.0 LGMPQFLSTEAQSLLR              | Label:13C(6)15N(4)(R) @16                                                                                                                               | -0.00514433 | 1799.94263 | 900.9786 | 1799.94788 | 900.981262 | 2 | 17 | 20.2418 | 114.74 |
| 2 | 66.08 | 68.08 | 40.2 RPS6KA1_FlexIII | 99.0 LGMPQFLSTEAQSLLR              | Label:13C(6)15N(4)(R) @16                                                                                                                               | 0.00020345  | 1799.94812 | 600.99   | 1799.94788 | 600.989929 | 3 | 18 | 20.3537 | 114.74 |
| 2 | 66.08 | 68.08 | 40.2 RPS6KA1_FlexIII | 99.0 LGSQPDGAEIKR                  | Label:13C(6)15N(2)(K) @12; Label:13C(6)15N(4)(R) @13                                                                                                    | -0.00262189 | 1345.69299 | 449.5716 | 1345.69566 | 449.57251  | 3 | 12 | 14.3402 | 114.74 |
| 2 | 66.08 | 68.08 | 40.2 RPS6KA1_FlexIII | 99.0 LGSQPDGAEIKR                  | Label:13C(6)15N(2)(K) @12; Label:13C(6)15N(4)(R) @13                                                                                                    | 0.0108904   | 1345.70642 | 673.8605 | 1345.69566 | 673.855103 | 2 | 15 | 14.3654 | 114.74 |
| 2 | 66.08 | 68.08 | 40.2 RPS6KA1_FlexIII | 99.0 LGSQPDGAEIKR                  | Label:13C(6)15N(2)(K) @12; Label:13C(6)15N(4)(R) @13                                                                                                    | 0.00246743  | 1345.69812 | 673.8563 | 1345.69566 | 673.855103 | 2 | 15 | 14.4131 | 114.74 |
| 2 | 66.08 | 68.08 | 40.2 RPS6KA1_FlexIII | 99.0 LDTDFGLSK                     | Label:13C(6)15N(2)(K) @8                                                                                                                                | -0.00121186 | 887.483276 | 444.7489 | 887.484375 | 444.749481 | 2 | 10 | 16.8841 | 114.74 |
| 2 | 66.08 | 68.08 | 40.2 RPS6KA1_FlexIII | 99.0 MLHVDPHQR                     | Label:13C(6)15N(4)(R) @9                                                                                                                                | -0.00456059 | 1141.56421 | 381.5287 | 1141.56897 | 381.530273 | 3 | 10 | 13.9878 | 114.74 |
| 2 | 66.08 | 68.08 | 40.2 RPS6KA1_FlexIII | 99.0 MLHVDPHQR                     | Label:13C(6)15N(4)(R) @9                                                                                                                                | -0.00456059 | 1141.56421 | 381.5287 | 1141.56897 | 381.530273 | 3 | 11 | 14.0004 | 114.74 |
| 2 | 66.08 | 68.08 | 40.2 RPS6KA1_FlexIII | 99.0 MLHVDPHQR                     | Label:13C(6)15N(4)(R) @9                                                                                                                                | 0.0003151   | 1141.56921 | 571.7919 | 1141.56897 | 571.791809 | 2 | 12 | 14.0231 | 114.74 |
| 2 | 66.08 | 68.08 | 40.2 RPS6KA1_FlexIII | 99.0 MLHVDPHQR                     | Label:13C(6)15N(4)(R) @9                                                                                                                                | 0.00141374  | 1141.57044 | 571.7925 | 1141.56897 | 571.791809 | 2 | 11 | 14.0706 | 114.74 |
| 2 | 66.08 | 68.08 | 40.2 RPS6KA1_FlexIII | 99.0 MLHVDPHQR                     | Label:13C(6)15N(4)(R) @9                                                                                                                                | -0.00391972 | 1141.56519 | 381.529  | 1141.56897 | 381.530273 | 3 | 9  | 14.0933 | 114.74 |
| 2 | 66.08 | 68.08 | 40.2 RPS6KA1_FlexIII | 99.0 MLHVDPHQR                     | Label:13C(6)15N(4)(R) @9                                                                                                                                | 0.0590691   | 1141.62817 | 381.55   | 1141.56897 | 381.530273 | 3 | 9  | 14.1865 | 114.74 |
| 2 | 66.08 | 68.08 | 40.2 RPS6KA1_FlexIII | 99.0 MLHVDPHQR                     | Label:13C(6)15N(4)(R) @9                                                                                                                                | 0.0590691   | 1141.62817 | 381.55   | 1141.56897 | 381.530273 | 3 | 9  | 14.1888 | 114.74 |
| 2 | 66.08 | 68.08 | 40.2 RPS6KA1_FlexIII | 99.0 MLHVDPHQR                     | Label:13C(6)15N(4)(R) @9                                                                                                                                | 0.0590691   | 1141.62817 | 381.55   | 1141.56897 | 381.530273 | 3 | 9  | 14.2114 | 114.74 |
| 2 | 66.08 | 68.08 | 40.2 RPS6KA1_FlexIII | 99.0 NLVFSQGVVVK                   | Label:13C(6)15N(2)(K) @11                                                                                                                               | 1.90E-05    | 1247.66431 | 624.8394 | 1247.66419 | 624.839356 | 2 | 11 | 17.8862 | 114.74 |
| 2 | 66.08 | 68.08 | 40.2 RPS6KA1_FlexIII | 99.0 NLVFSQGVVVK                   | Label:13C(6)15N(2)(K) @11                                                                                                                               | 0.00172804  | 1247.66589 | 624.8402 | 1247.66419 | 624.839356 | 2 | 10 | 17.9394 | 114.74 |
| 2 | 66.08 | 68.08 | 40.2 RPS6KA1_FlexIII | 99.0 TVEYLHSQGVVHR                 | Label:13C(6)15N(4)(R) @13                                                                                                                               | -0.00130582 | 1533.7915  | 512.2711 | 1533.79273 | 512.271545 | 3 | 13 | 14.8572 | 114.74 |
| 2 | 66.08 | 68.08 | 40.2 RPS6KA1_FlexIII | 99.0 TVEYLHSQGVVHR                 | Label:13C(6)15N(4)(R) @13                                                                                                                               | 0.0113052   | 1533.8042  | 384.4583 | 1533.79273 | 384.455475 | 4 | 11 | 14.8788 | 114.74 |
| 2 | 66.08 | 68.08 | 40.2 RPS6KA1_FlexIII | 99.0 TVEYLHSQGVVHR                 | Label:13C(6)15N(4)(R) @13                                                                                                                               | -0.0009396  | 1533.79175 | 512.2712 | 1533.79273 | 512.271545 | 3 | 13 | 14.8858 | 114.74 |
| 2 | 66.08 | 68.08 | 40.2 RPS6KA1_FlexIII | 99.0 TVEYLHSQGVVHR                 | Label:13C(6)15N(4)(R) @13                                                                                                                               | -0.00148892 | 1533.7915  | 512.2711 | 1533.79273 | 512.271545 | 3 | 12 | 14.9463 | 114.74 |
| 2 | 66.08 | 68.08 | 40.2 RPS6KA1_FlexIII | 99.0 VFLVR                         | Label:13C(6)15N(4)(R) @5                                                                                                                                | -0.0038076  | 642.405457 | 322.21   | 642.409241 | 322.211914 | 2 | 6  | 16.7732 | 114.74 |
| 2 | 66.08 | 68.08 | 40.2 RPS6KA1_FlexIII | 99.0 VLQGSFGFK                     | Label:13C(6)15N(2)(K) @9                                                                                                                                | -0.00130371 | 899.494263 | 450.7544 | 899.495066 | 450.755096 | 2 | 11 | 15.685  | 114.74 |
| 2 | 66.08 | 68.08 | 40.2 RPS6KA1_FlexIII | 99.0 VTRPDSGHLVAMK                 | Label:13C(6)15N(4)(R) @3; Label:13C(6)15N(2)(K) @13                                                                                                     | 0.00150157  | 1491.76379 | 373.9482 | 1491.76233 | 373.947846 | 4 | 11 | 14.9319 | 114.74 |
| 2 | 66.08 | 68.08 | 40.2 RPS6KA1_FlexIII | 99.0 YQGPHNIITLK                   | Label:13C(6)15N(2)(K) @11                                                                                                                               | -0.00356926 | 1290.71411 | 431.2453 | 1290.71753 | 431.24646  | 3 | 15 | 16.3285 | 114.74 |
| 2 | 66.08 | 68.08 | 40.2 RPS6KA1_FlexIII | 99.0 YPTFLYK                       | Label:13C(6)15N(2)(K) @7                                                                                                                                | -0.00061447 | 938.498657 | 470.2566 | 938.499329 | 470.256928 | 2 | 9  | 17.7815 | 114.74 |
| 3 | 60.89 | 62.89 | 59.3 BTRC_FlexIII    | 99.0 AAVNVVDFDDK                   | Label:13C(6)15N(2)(K) @11                                                                                                                               | -0.0047445  | 1199.58667 | 600.8006 | 1199.59131 | 600.802979 | 2 | 14 | 17.1448 | 41.90  |
| 3 | 60.89 | 62.89 | 59.3 BTRC_FlexIII    | 99.0 AAVNVVDFDDKYIVSASGDR          | Label:13C(6)15N(2)(K) @11; Label:13C(6)15N(4)(R) @20                                                                                                    | -0.00488934 | 2158.06128 | 720.361  | 2158.06616 | 720.362671 | 3 | 19 | 26.6389 | 41.90  |
| 3 | 60.89 | 62.89 | 59.3 BTRC_FlexIII    | 99.0 APAGTLCCLR                    | Propionamide(C) @7; Label:13C(6)15N(4)(R) @9                                                                                                            | -0.00107859 | 981.52948  | 491.772  | 981.530518 | 491.772522 | 2 | 11 | 16.2803 | 41.90  |
| 3 | 60.89 | 62.89 | 59.3 BTRC_FlexIII    | 99.0 CLYNPGTGALTAQNSSER            | Propionamide(C) @1; Label:13C(6)15N(4)(R) @19                                                                                                           | 0.00457984  | 2108.98731 | 1055.501 | 2108.98242 | 1055.49854 | 2 | 21 | 18.1565 | 41.90  |
| 3 | 60.89 | 62.89 | 59.3 BTRC_FlexIII    | 99.0 CLYNPGTGALTAQNSSEREDCNNGEPPRK | Propionamide(C) @1; Label:13C(6)15N(4)(R) @19; Propionamide(C) @22; Label:13C(6)15N(4)(R) @29; Label:13C(6)15N(2)(K) @3c missed R-E @19; missed R-K @29 | 0.00491085  | 3437.57739 | 860.4016 | 3437.57227 | 860.40033  | 4 | 10 | 17.2535 | 41.90  |
| 3 | 60.89 | 62.89 | 59.3 BTRC_FlexIII    | 99.0 DFITALPAR                     | Label:13C(6)15N(2)(K) @9                                                                                                                                | 0.00043195  | 1012.55847 | 507.2865 | 1012.55811 | 507.286316 | 2 | 9  | 17.9107 | 41.90  |
| 3 | 60.89 | 62.89 | 59.3 BTRC_FlexIII    | 99.0 FMCSMPR                       | Propionamide(C) @3; Label:13C(6)15N(4)(R) @7                                                                                                            | -0.00068053 | 951.399902 | 476.7072 | 951.400391 | 476.707489 | 2 | 8  | 16.2753 | 41.90  |
| 3 | 60.89 | 62.89 | 59.3 BTRC_FlexIII    | 99.0 FNNGMMVTCSK                   | Propionamide(C) @9; Label:13C(6)15N(2)(K) @11                                                                                                           | 0.00140722  | 1309.57227 | 655.7934 | 1309.5708  | 655.792725 | 2 | 14 | 16.0977 | 41.90  |
| 3 | 60.89 | 62.89 | 59.3 BTRC_FlexIII    | 99.0 GLDHIAENILSYLDAK              | Label:13C(6)15N(2)(K) @16                                                                                                                               | -0.00957736 | 1778.9198  | 593.9805 | 1778.92944 | 593.983765 | 3 | 17 | 20.2437 | 41.90  |
| 3 | 60.89 | 62.89 | 59.3 BTRC_FlexIII    | 99.0 GYVCLOYDDOK                   | Propionamide(C) @4; Label:13C(6)15N(2)(K) @11                                                                                                           | 0.00014248  | 1409.63782 | 705.8262 | 1409.6377  | 705.826111 | 2 | 10 | 16.4775 | 41.90  |
| 3 | 60.89 | 62.89 | 59.3 BTRC_FlexIII    | 99.0 IIQDIETIESNWR                 | Label:13C(6)15N(4)(R) @13                                                                                                                               | 0.00051524  | 1625.82935 | 542.9504 | 1625.82886 | 542.950256 | 3 | 16 | 18.6635 | 41.90  |
| 3 | 60.89 | 62.89 | 59.3 BTRC_FlexIII    | 99.0 IKWVDLVAALDPR                 | Label:13C(6)15N(2)(K) @2; Label:13C(6)15N(4)(R) @13                                                                                                     | -0.00209394 | 1512.87622 | 757.4454 | 1512.8783  | 757.446411 | 2 | 19 | 20.0076 | 41.90  |
| 3 | 60.89 | 62.89 | 59.3 BTRC_FlexIII    | 99.0 ILTGHGTGSVLCLOYDER            | Propionamide(C) @11; Label:13C(6)15N(4)(R) @17                                                                                                          | -0.00205328 | 1984.9895  | 993.502  | 1984.99158 | 993.503052 | 2 | 16 | 17.42   | 41.90  |
| 3 | 60.89 | 62.89 | 59.3 BTRC_FlexIII    | 99.0 IWDKNTLECK                    | Label:13C(6)15N(2)(K) @4; Label:13C(6)15N(2)(K) @9; Label:13C(6)15N(2)(K) @10                                                                           | 0.00256113  | 1335.68518 | 446.2357 | 1335.68274 | 446.234863 | 3 | 10 | 15.7035 | 41.90  |
| 3 | 60.89 | 62.89 | 59.3 BTRC_FlexIII    | 99.0 LANGTSSMIVPK                  | Label:13C(6)15N(2)(K) @12                                                                                                                               | -0.00035978 | 1224.66248 | 613.3385 | 1224.66272 | 613.338684 | 2 | 16 | 16.352  | 41.90  |
| 3 | 60.89 | 62.89 | 59.3 BTRC_FlexIII    | 99.0 LCLNQETVCLASTAMK              | Propionamide(C) @2; Propionamide(C) @9; Label:13C(6)15N(                                                                                                |             |            |          |            |            |   |    |         |        |

|   |       |       |                   |                                   |                                                                                                                                                         |                |            |            |            |            |            |    |         |         |       |
|---|-------|-------|-------------------|-----------------------------------|---------------------------------------------------------------------------------------------------------------------------------------------------------|----------------|------------|------------|------------|------------|------------|----|---------|---------|-------|
| 3 | 60.89 | 62.89 | 59.3 BTRC_FlexIII | 99.0 SLCAEALVCK                   | Propionamide(C) @3; Propionamide(C) @9; Label:13C(6)15N(2)(K) @10                                                                                       | 0.0006973      | 1185.59851 | 593.8065   | 1185.59766 | 593.806152 | 2          | 10 | 16.9277 | 41.90   |       |
| 3 | 60.89 | 62.89 | 59.3 BTRC_FlexIII | 99.0 SLWLGCSSLADSMPSLR            | Propionamide(C) @6                                                                                                                                      | -0.00944695    | 1892.90308 | 947.4588   | 1892.91248 | 947.463501 | 2          | 18 | 19.5055 | 41.90   |       |
| 3 | 60.89 | 62.89 | 59.3 BTRC_FlexIII | 99.0 TDSLWR                       | Label:13C(6)15N(4)(R) @6                                                                                                                                | -0.00121473    | 786.388855 | 394.2017   | 786.389954 | 394.202271 | 2          | 7  | 16.7436 | 41.90   |       |
| 3 | 60.89 | 62.89 | 59.3 BTRC_FlexIII | 99.0 TTYVISR                      | Label:13C(6)15N(4)(R) @7                                                                                                                                | -0.00083885    | 912.457275 | 457.2359   | 912.458069 | 457.236298 | 2          | 8  | 15.478  | 41.90   |       |
| 3 | 60.89 | 62.89 | 59.3 BTRC_FlexIII | 99.0 VIETSSSDSTVR                 | Label:13C(6)15N(4)(R) @12                                                                                                                               | -8.49E-05      | 1243.66467 | 622.8396   | 1243.6648  | 622.839661 | 2          | 12 | 15.3879 | 41.90   |       |
| 3 | 60.89 | 62.89 | 59.3 BTRC_FlexIII | 99.0 VLEGHEELVR                   | Label:13C(6)15N(4)(R) @10                                                                                                                               | -0.0020623     | 1189.63086 | 397.5509   | 1189.63306 | 397.551636 | 3          | 9  | 15.2952 | 41.90   |       |
| 3 | 60.89 | 62.89 | 59.3 BTRC_FlexIII | 99.0 VVDLVAALDPR                  | Label:13C(6)15N(4)(R) @11                                                                                                                               | -0.00179832    | 1263.68323 | 632.8489   | 1263.68506 | 632.849793 | 2          | 12 | 20.0202 | 41.90   |       |
| 3 | 60.89 | 62.89 | 59.3 BTRC_FlexIII | 99.0 VVDVNTGEMNTLIHHCEAVLHLR      | Propionamide(C) @17; Label:13C(6)15N(4)(R) @24                                                                                                          | -0.00654574    | 2880.43359 | 577.094    | 2880.44019 | 577.095337 | 5          | 14 | 19.9191 | 41.90   |       |
| 3 | 60.89 | 62.89 | 59.3 BTRC_FlexIII | 99.0 VVWNTTCEFVR                  | Propionamide(C) @7; Label:13C(6)15N(4)(R) @11                                                                                                           | 0.00100329     | 1421.66467 | 711.8396   | 1421.6637  | 711.839111 | 2          | 12 | 17.3466 | 41.90   |       |
| 3 | 60.89 | 62.89 | 59.3 BTRC_FlexIII | 99.0 AAVNVVDFDDKYIVSASGDR         | Label:13C(6)15N(2)(K) @11; Label:13C(6)15N(4)(R) @20                                                                                                    | -0.00488934    | 2158.06128 | 720.361    | 2158.06616 | 720.362671 | 3          | 24 | 17.8221 | 41.90   |       |
| 3 | 60.89 | 62.89 | 59.3 BTRC_FlexIII | 99.0 AAVNVVDFDDKYIVSASGDR         | Deamidated(N) @4; Label:13C(6)15N(2)(K) @11; Label:13C(6)15N(4)(R) @20                                                                                  | 0.0311794      | 2159.08106 | 720.701    | 2159.05005 | 720.690674 | 3          | 15 | 17.8321 | 41.90   |       |
| 3 | 60.89 | 62.89 | 59.3 BTRC_FlexIII | 99.0 AAVNVVDFDDKYIVSASGDR         | Label:13C(6)15N(2)(K) @11; Label:13C(6)15N(4)(R) @20                                                                                                    | missed K-Y @11 | 0.00410891 | 2158.06934 | 1080.042   | 2158.06616 | 1080.04028 | 2  | 27      | 17.865  | 41.90 |
| 3 | 60.89 | 62.89 | 59.3 BTRC_FlexIII | 99.0 AAVNVVDFDDKYIVSASGDR         | Deamidated(N) @4; Label:13C(6)15N(2)(K) @11; Label:13C(6)15N(4)(R) @20                                                                                  | missed K-Y @11 | 0.020097   | 2159.06934 | 1080.542   | 2159.05005 | 1080.53235 | 2  | 16      | 17.9133 | 41.90 |
| 3 | 60.89 | 62.89 | 59.3 BTRC_FlexIII | 99.0 AAVNVVDFDDKYIVSASGDR         | Deamidated(N) @4; Label:13C(6)15N(2)(K) @11; Label:13C(6)15N(4)(R) @20                                                                                  | missed K-Y @11 | 0.0311794  | 2159.08106 | 720.701    | 2159.05005 | 720.690674 | 3  | 15      | 26.6516 | 41.90 |
| 3 | 60.89 | 62.89 | 59.3 BTRC_FlexIII | 99.0 APAGTLCLR                    | Propionamide(C) @7; Label:13C(6)15N(4)(R) @9                                                                                                            | -0.00046823    | 981.53009  | 491.7723   | 981.530518 | 491.772522 | 2          | 12 | 16.2454 | 41.90   |       |
| 3 | 60.89 | 62.89 | 59.3 BTRC_FlexIII | 99.0 CLYNPGTALTAFQNSSER           | Propionamide(C) @1; Deamidated(N) @4; Label:13C(6)15N(4)(R) @19                                                                                         | 0.0234976      | 2109.98926 | 1056.002   | 2109.96655 | 1055.99048 | 2          | 16 | 18.1261 | 41.90   |       |
| 3 | 60.89 | 62.89 | 59.3 BTRC_FlexIII | 99.0 CLYNPGTALTAFQNSSER           | Propionamide(C) @1; Label:13C(6)15N(4)(R) @19                                                                                                           | 0.00457984     | 2108.98731 | 1055.501   | 2108.98242 | 1055.49854 | 2          | 23 | 18.1489 | 41.90   |       |
| 3 | 60.89 | 62.89 | 59.3 BTRC_FlexIII | 99.0 CLYNPGTALTAFQNSSERDCNNGEPKRX | Propionamide(C) @1; Label:13C(6)15N(4)(R) @19; Propionamide(C) @22; Deamidated(N) @24; Label:13C(6)15N(4)(R) @29; Label: missed R-E @19; missed R-K @29 | 0.0208989      | 3438.57739 | 860.6516   | 3438.5564  | 860.646362 | 4          | 10 | 17.2231 | 41.90   |       |
| 3 | 60.89 | 62.89 | 59.3 BTRC_FlexIII | 99.0 DFITALPAR                    | Label:13C(6)15N(4)(R) @9                                                                                                                                | 0.00043195     | 1012.55847 | 507.2865   | 1012.55811 | 507.286316 | 2          | 10 | 17.898  | 41.90   |       |
| 3 | 60.89 | 62.89 | 59.3 BTRC_FlexIII | 99.0 FMCSMPR                      | Propionamide(C) @3; Label:13C(6)15N(4)(R) @7                                                                                                            | -0.00049742    | 951.399902 | 476.7072   | 951.400391 | 476.707489 | 2          | 8  | 16.2334 | 41.90   |       |
| 3 | 60.89 | 62.89 | 59.3 BTRC_FlexIII | 99.0 FMCSMPR                      | Propionamide(C) @3; Label:13C(6)15N(4)(R) @7                                                                                                            | -0.00049742    | 951.399902 | 476.7072   | 951.400391 | 476.707489 | 2          | 8  | 16.2357 | 41.90   |       |
| 3 | 60.89 | 62.89 | 59.3 BTRC_FlexIII | 99.0 FNNGMVMVTSCK                 | Propionamide(C) @9; Label:13C(6)15N(2)(K) @11                                                                                                           | 0.00140722     | 1309.57227 | 655.7934   | 1309.5708  | 655.792725 | 2          | 14 | 16.0851 | 41.90   |       |
| 3 | 60.89 | 62.89 | 59.3 BTRC_FlexIII | 99.0 FNNGMVMVTSCK                 | Deamidated(N) @3; Propionamide(C) @9; Label:13C(6)15N(2)(K) @11                                                                                         | 0.00042747     | 1310.5553  | 656.2849   | 1310.55481 | 656.284729 | 2          | 11 | 16.3671 | 41.90   |       |
| 3 | 60.89 | 62.89 | 59.3 BTRC_FlexIII | 99.0 GLDHAENILSLYDAK              | Deamidated(N) @8; Label:13C(6)15N(2)(K) @16                                                                                                             | 0.0264914      | 1779.94006 | 594.3206   | 1779.91345 | 594.311768 | 3          | 13 | 20.2488 | 41.90   |       |
| 3 | 60.89 | 62.89 | 59.3 BTRC_FlexIII | 99.0 GLDHAENILSLYDAK              | Label:13C(6)15N(2)(K) @16                                                                                                                               | 0.00015332     | 1778.92944 | 890.472    | 1778.92944 | 890.471985 | 2          | 24 | 20.2539 | 41.90   |       |
| 3 | 60.89 | 62.89 | 59.3 BTRC_FlexIII | 99.0 GLDHAENILSLYDAK              | Label:13C(6)15N(2)(K) @16                                                                                                                               | 0.00015332     | 1778.92944 | 890.472    | 1778.92944 | 890.471985 | 2          | 27 | 20.2665 | 41.90   |       |
| 3 | 60.89 | 62.89 | 59.3 BTRC_FlexIII | 99.0 GLDHAENILSLYDAK              | Label:13C(6)15N(2)(K) @16                                                                                                                               | -0.00316865    | 1778.92639 | 593.9827   | 1778.92944 | 593.983765 | 3          | 18 | 20.302  | 41.90   |       |
| 3 | 60.89 | 62.89 | 59.3 BTRC_FlexIII | 99.0 GYVCLOYDDOK                  | Propionamide(C) @4; Label:13C(6)15N(2)(K) @11                                                                                                           | 0.00014248     | 1409.63782 | 705.8262   | 1409.6377  | 705.826111 | 2          | 10 | 16.4749 | 41.90   |       |
| 3 | 60.89 | 62.89 | 59.3 BTRC_FlexIII | 99.0 IIQDIETIESNWR                | Label:13C(6)15N(4)(R) @13                                                                                                                               | 0.00237236     | 1625.8313  | 813.9229   | 1625.82886 | 813.921692 | 2          | 17 | 18.6001 | 41.90   |       |
| 3 | 60.89 | 62.89 | 59.3 BTRC_FlexIII | 99.0 IIQDIETIESNWR                | Label:13C(6)15N(4)(R) @13                                                                                                                               | 0.00237236     | 1625.8313  | 813.9229   | 1625.82886 | 813.921692 | 2          | 17 | 18.6027 | 41.90   |       |
| 3 | 60.89 | 62.89 | 59.3 BTRC_FlexIII | 99.0 IIQDIETIESNWR                | Label:13C(6)15N(4)(R) @13                                                                                                                               | 0.00151786     | 1625.83044 | 813.9225   | 1625.82886 | 813.921692 | 2          | 16 | 18.633  | 41.90   |       |
| 3 | 60.89 | 62.89 | 59.3 BTRC_FlexIII | 99.0 IIQDIETIESNWR                | Label:13C(6)15N(4)(R) @13                                                                                                                               | 0.00161388     | 1625.8302  | 542.9507   | 1625.82886 | 542.950256 | 3          | 15 | 18.6862 | 41.90   |       |
| 3 | 60.89 | 62.89 | 59.3 BTRC_FlexIII | 99.0 IIQDIETIESNWR                | Label:13C(6)15N(4)(R) @13                                                                                                                               | 0.00143077     | 1625.8302  | 542.9507   | 1625.82886 | 542.950256 | 3          | 15 | 18.7242 | 41.90   |       |
| 3 | 60.89 | 62.89 | 59.3 BTRC_FlexIII | 99.0 IKWVDLVAALDPR                | Label:13C(6)15N(2)(K) @2; Label:13C(6)15N(4)(R) @13                                                                                                     | -0.00087323    | 1512.87744 | 757.446    | 1512.8783  | 757.446411 | 2          | 20 | 19.9722 | 41.90   |       |
| 3 | 60.89 | 62.89 | 59.3 BTRC_FlexIII | 99.0 IKWVDLVAALDPR                | Label:13C(6)15N(2)(K) @2; Label:13C(6)15N(4)(R) @13                                                                                                     | missed K-V @2  | 0.00056556 | 1512.87878 | 505.3002   | 1512.8783  | 505.300049 | 3  | 15      | 19.9949 | 41.90 |
| 3 | 60.89 | 62.89 | 59.3 BTRC_FlexIII | 99.0 ILTGHTGSVLCLQYDER            | Label:13C(6)15N(2)(K) @2; Label:13C(6)15N(4)(R) @13                                                                                                     | missed K-V @2  | -0.0009807 | 1984.99048 | 662.6708   | 1984.99158 | 662.671143 | 3  | 22      | 17.3138 | 41.90 |
| 3 | 60.89 | 62.89 | 59.3 BTRC_FlexIII | 99.0 ILTGHTGSVLCLQYDER            | Propionamide(C) @11; Label:13C(6)15N(4)(R) @17                                                                                                          | -0.0009807     | 1984.99048 | 662.6708   | 1984.99158 | 662.671143 | 3          | 21 | 17.3163 | 41.90   |       |
| 3 | 60.89 | 62.89 | 59.3 BTRC_FlexIII | 99.0 ILTGHTGSVLCLQYDER            | Propionamide(C) @11; Label:13C(6)15N(4)(R) @17                                                                                                          | 0.0017659      | 1984.99365 | 662.6718   | 1984.99158 | 662.671143 | 3          | 22 | 17.3593 | 41.90   |       |
| 3 | 60.89 | 62.89 | 59.3 BTRC_FlexIII | 99.0 ILTGHTGSVLCLQYDER            | Propionamide(C) @11; Label:13C(6)15N(4)(R) @17                                                                                                          | 0.00085037     | 1984.99231 | 662.6714   | 1984.99158 | 662.671143 | 3          | 21 | 17.4098 | 41.90   |       |
| 3 | 60.89 | 62.89 | 59.3 BTRC_FlexIII | 99.0 ILTGHTGSVLCLQYDER            | Propionamide(C) @11; Label:13C(6)15N(4)(R) @17                                                                                                          | -0.0009807     | 1984.99048 | 662.6708   | 1984.99158 | 662.671143 | 3          | 15 | 26.6059 | 41.90   |       |
| 3 | 60.89 | 62.89 | 59.3 BTRC_FlexIII | 99.0 ILTGHTGSVLCLQYDER            | Propionamide(C) @11; Deamidated(Q) @13; Label:13C(6)15N(4)(R) @17                                                                                       | 0.00050583     | 1985.98096 | 663.0009   | 1985.97559 | 662.999146 | 3          | 13 | 26.6237 | 41.90   |       |
| 3 | 60.89 | 62.89 | 59.3 BTRC_FlexIII | 99.0 ILTGHTGSVLCLQYDER            | Propionamide(C) @11; Label:13C(6)15N(4)(R) @17                                                                                                          | -0.0009807     | 1984.99048 | 662.6708   | 1984.99158 | 662.671143 | 3          | 9  | 27.1198 | 41.90   |       |
| 3 | 60.89 | 62.89 | 59.3 BTRC_FlexIII | 99.0 LANGTSSMIVPK                 | Label:13C(6)15N(2)(K) @12                                                                                                                               | -0.00035978    | 1224.66248 | 613.3385   | 1224.66272 | 613.338684 | 2          | 15 | 16.357  | 41.90   |       |
| 3 | 60.89 | 62.89 | 59.3 BTRC_FlexIII | 99.0 LANGTSSMIVPK                 | Label:13C(6)15N(2)(K) @12                                                                                                                               | -0.00035978    | 1224.66248 | 613.3385   | 1224.66272 | 613.338684 | 2          | 14 | 16.3646 | 41.90   |       |
| 3 | 60.89 | 62.89 | 59.3 BTRC_FlexIII | 99.0 LANGTSSMIVPK                 | Deamidated(N) @3; Label:13C(6)15N(2)(K) @12                                                                                                             | -0.00048503    | 1225.64624 | 613.8304   | 1225.64673 | 613.830689 | 2          | 13 | 16.48   | 41.90   |       |
| 3 | 60.89 | 62.89 | 59.3 BTRC_FlexIII | 99.0 LCLNQETVCLASTAMK             | Propionamide(C) @2; Propionamide(C) @9; Label:13C(6)15N(2)(K) @16                                                                                       | 0.00017012     | 1873.91931 | 937.9669   | 1873.91907 | 937.966858 | 2          | 22 | 18.2906 | 41.90   |       |
| 3 | 60.89 | 62.89 | 59.3 BTRC_FlexIII | 99.0 LCLNQETVCLASTAMK             | Propionamide(C) @2; Propionamide(C) @9; Label:13C(6)15N(2)(K) @16                                                                                       | 0.00017012     | 1873.91931 | 937.9669   | 1873.91907 | 937.966858 | 2          | 22 | 18.2983 | 41.90   |       |
| 3 | 60.89 | 62.89 | 59.3 BTRC_FlexIII | 99.0 LCLNQETVCLASTAMK             | Propionamide(C) @2; Propionamide(C) @9; Label:13C(6)15N(2)(K) @16                                                                                       | 0.0027336      | 1873.92188 | 937.9682   | 1873.91907 | 937.966858 | 2          | 20 | 18.3263 | 41.90   |       |
| 3 | 60.89 | 62.89 | 59.3 BTRC_FlexIII | 99.0 LCLNQETVCLASTAMK             | Propionamide(C) @2; Propionamide(C) @9; Label:13C(6)15N(2)(K) @16                                                                                       | 0.00236739     | 1873.92151 | 937.968    | 1873.91907 | 937.966858 | 2          | 18 | 18.3671 | 41.90   |       |
| 3 | 60.89 | 62.89 | 59.3 BTRC_FlexIII | 99.0 LCLNQETVCLASTAMK             | Propionamide(C) @2; Deamidated(Q) @5; Propionamide(C) @9; Label:13C(6)15N(2)(K) @16                                                                     | 0.0170477      | 1874.92029 | 625.9807   | 1874.9032  | 625.974976 | 3          | 14 | 18.3821 | 41.90   |       |
| 3 | 60.89 | 62.89 | 59.3 BTRC_FlexIII | 99.0 LCLNQETVCLASTAMK             | Propionamide(C) @2; Propionamide(C) @9; Label:13C(6)15N(2)(K) @16                                                                                       | 0.0111915      | 1873.9303  | 625.6507   | 1873.91907 | 625.646973 | 3          | 18 | 18.3897 | 41.90   |       |
| 3 | 60.89 | 62.89 | 59.3 BTRC_FlexIII | 99.0 LCLNQETVCLASTAMK             | Propionamide(C) @2; Deamidated(N) @4; Propionamide(C) @9; Label:13C(6)15N(2)(K) @16                                                                     | 0.0259239      | 1874.92908 | 938.4718   | 1874.9032  | 938.458862 | 2          | 8  | 26.582  | 41.90   |       |
| 3 | 60.89 | 62.89 | 59.3 BTRC_FlexIII | 99.0 LVVSGSSDNTIR                 | Label:13C(6)15N(4)(R) @12                                                                                                                               | -0.00016903    | 1256.65991 | 629.3372   | 1256.66003 | 629.33728  | 2          | 13 | 15.453  | 41.90   |       |
| 3 | 60.89 | 62.89 | 59.3 BTRC_FlexIII | 99.0 LVVSGSSDNTIR                 | Label:13C(6)15N(4)(R) @12                                                                                                                               | -0.00016903    | 1256.65991 | 629.3372   | 1256.66003 | 629.33728  | 2          | 13 | 15.4931 | 41.90   |       |
| 3 | 60.89 | 62.89 | 59.3 BTRC_FlexIII | 99.0 LVVSGSSDNTIR                 | Label:13C(6)15N(4)(R) @12                                                                                                                               | 0.00019718     | 1256.66028 | 629.3374   | 1256.66003 | 629.33728  | 2          | 12 | 15.563  | 41.90   |       |
| 3 | 60.89 | 62.89 | 59.3 BTRC_FlexIII | 99.0 NKPPDGNAPPSFYR               | Label:13C(6)15N(2)(K) @2; Deamidated(N) @11; Label:13C(6)15N(4)(R) @15                                                                                  | -0.00266894    | 1691.79968 | 564.9405   | 1691.80225 | 564.941345 | 3          | 11 | 15.3125 | 41.90   |       |
| 3 | 60.89 | 62.89 | 59.3 BTRC_FlexIII | 99.0 NKPPDGNAPPSFYR               | Label:13C(6)15N(2)(K) @2; Label:13C(6)15N(4)(R) @15                                                                                                     | -0.0008347     | 1690.81751 | 564.6131   | 1690.81824 | 564.613342 | 3          | 13 | 15.3627 | 41.90   |       |
| 3 | 60.89 | 62.89 | 59.3 BTRC_FlexIII | 99.0 RGWGQYLFK                    | Label:13C(6)15N(4)(R) @1; Label:13C(6)15N(2)(K) @9                                                                                                      | -0.00039317    | 1171.62524 | 586.8199   | 1171.62573 | 586.820129 | 2          | 9  | 17.8093 | 41.90   |       |
| 3 | 60.89 | 62.89 | 59.3 BTRC_FlexIII | 99.0 RGWGQYLFK                    | Label:13C(6)15N(4)(R) @1; Label:13C(6)15N(2)(K) @9                                                                                                      | missed R-G @1  | 0.00190012 | 1171.62756 | 391.5498   | 1171.62573 | 391.549194 | 3  | 9       | 17.8372 | 41.90 |
| 3 | 60.89 | 62.89 | 59.3 BTRC_FlexIII | 99.0 SIAVWDMASPTDITLR             | Label:13C(6)15N(4)(R) @16                                                                                                                               | missed R-G @1  | 0.00380274 | 1784.90442 | 893.4595   | 1784.90064 | 893.457581 | 2  | 21      | 19.3557 | 41.90 |
| 3 | 60.89 |       |                   |                                   |                                                                                                                                                         |                |            |            |            |            |            |    |         |         |       |

|   |       |       |                  |                                        |                                                                                                       |             |            |          |            |            |   |    |         |       |
|---|-------|-------|------------------|----------------------------------------|-------------------------------------------------------------------------------------------------------|-------------|------------|----------|------------|------------|---|----|---------|-------|
| 3 | 60.89 | 62.89 | 59.3 BTRC_FlexII | 99.0 SLWLGCCSLADSMPSLR                 | Propionamide(C) @6; Label: 13C(6)15N(4)(R) @17                                                        | 0.00429358  | 1902.92505 | 952.4698 | 1902.92078 | 952.467651 | 2 | 21 | 19.399  | 41.90 |
| 3 | 60.89 | 62.89 | 59.3 BTRC_FlexII | 99.0 SLWLGCCSLADSMPSLR                 | Propionamide(C) @6; Label: 13C(6)15N(4)(R) @17                                                        | -0.00071133 | 1902.92004 | 952.4673 | 1902.92078 | 952.467651 | 2 | 19 | 19.4167 | 41.90 |
| 3 | 60.89 | 62.89 | 59.3 BTRC_FlexII | 99.0 SLWLGCCSLADSMPSLR                 | Propionamide(C) @6; Label: 13C(6)15N(4)(R) @17                                                        | -0.00351895 | 1902.91724 | 952.4659 | 1902.92078 | 952.467651 | 2 | 20 | 19.4498 | 41.90 |
| 3 | 60.89 | 62.89 | 59.3 BTRC_FlexII | 99.0 SLWLGCCSLADSMPSLR                 | Propionamide(C) @6; Label: 13C(6)15N(4)(R) @17                                                        | -0.00254239 | 1902.91821 | 952.4664 | 1902.92078 | 952.467651 | 2 | 18 | 19.5107 | 41.90 |
| 3 | 60.89 | 62.89 | 59.3 BTRC_FlexII | 99.0 SLWLGCCSLADSMPSLR                 | Propionamide(C) @6                                                                                    | -0.00370962 | 1892.90881 | 947.4617 | 1892.91248 | 947.463501 | 2 | 18 | 19.5132 | 41.90 |
| 3 | 60.89 | 62.89 | 59.3 BTRC_FlexII | 99.0 TTYVISR                           | Label: 13C(6)15N(4)(R) @7                                                                             | -0.00065575 | 912.457459 | 457.236  | 912.458069 | 457.236298 | 2 | 8  | 15.4232 | 41.90 |
| 3 | 60.89 | 62.89 | 59.3 BTRC_FlexII | 99.0 VIITGSSDSTVR                      | Label: 13C(6)15N(4)(R) @12                                                                            | -8.49E-05   | 1243.66467 | 622.8396 | 1243.6648  | 622.839661 | 2 | 14 | 15.398  | 41.90 |
| 3 | 60.89 | 62.89 | 59.3 BTRC_FlexII | 99.0 VIITGSSDSTVR                      | Label: 13C(6)15N(4)(R) @12                                                                            | 3.72E-05    | 1243.66492 | 622.8397 | 1243.6648  | 622.839661 | 2 | 13 | 15.4181 | 41.90 |
| 3 | 60.89 | 62.89 | 59.3 BTRC_FlexII | 99.0 VIITGSSDSTVR                      | Label: 13C(6)15N(4)(R) @12                                                                            | 0.00028132  | 1243.66504 | 622.8398 | 1243.6648  | 622.839661 | 2 | 12 | 15.5057 | 41.90 |
| 3 | 60.89 | 62.89 | 59.3 BTRC_FlexII | 99.0 VLEGHEELVR                        | Label: 13C(6)15N(4)(R) @10                                                                            | -0.0020623  | 1189.63086 | 397.5509 | 1189.63306 | 397.551636 | 3 | 12 | 15.1797 | 41.90 |
| 3 | 60.89 | 62.89 | 59.3 BTRC_FlexII | 99.0 VLEGHEELVR                        | Label: 13C(6)15N(4)(R) @10                                                                            | -0.0020623  | 1189.63086 | 397.5509 | 1189.63306 | 397.551636 | 3 | 12 | 15.2025 | 41.90 |
| 3 | 60.89 | 62.89 | 59.3 BTRC_FlexII | 99.0 VLEGHEELVR                        | Label: 13C(6)15N(4)(R) @10                                                                            | -0.00169609 | 1189.63147 | 397.5511 | 1189.63306 | 397.551636 | 3 | 12 | 15.2149 | 41.90 |
| 3 | 60.89 | 62.89 | 59.3 BTRC_FlexII | 99.0 VLEGHEELVR                        | Label: 13C(6)15N(4)(R) @10                                                                            | -0.00069346 | 1189.63245 | 595.8235 | 1189.63306 | 595.823792 | 2 | 14 | 15.2976 | 41.90 |
| 3 | 60.89 | 62.89 | 59.3 BTRC_FlexII | 99.0 VVDLVAALDPR                       | Label: 13C(6)15N(4)(R) @11                                                                            | -0.00155418 | 1263.68372 | 632.8491 | 1263.68506 | 632.849793 | 2 | 15 | 19.9039 | 41.90 |
| 3 | 60.89 | 62.89 | 59.3 BTRC_FlexII | 99.0 VVDLVAALDPR                       | Label: 13C(6)15N(4)(R) @11                                                                            | -0.00155418 | 1263.68372 | 632.8491 | 1263.68506 | 632.849793 | 2 | 15 | 19.9064 | 41.90 |
| 3 | 60.89 | 62.89 | 59.3 BTRC_FlexII | 99.0 VVDLVAALDPR                       | Label: 13C(6)15N(4)(R) @11                                                                            | -0.00143211 | 1263.68372 | 632.8491 | 1263.68506 | 632.849793 | 2 | 15 | 19.9342 | 41.90 |
| 3 | 60.89 | 62.89 | 59.3 BTRC_FlexII | 99.0 VVDVNTGEMNTLIHHCEAVLHLR           | Propionamide(C) @17; Label: 13C(6)15N(4)(R) @24                                                       | -0.00654574 | 2880.43359 | 577.094  | 2880.44019 | 577.095337 | 5 | 15 | 19.914  | 41.90 |
| 3 | 60.89 | 62.89 | 59.3 BTRC_FlexII | 99.0 VVDVNTGEMNTLIHHCEAVLHLR           | Propionamide(C) @17; Label: 13C(6)15N(4)(R) @24                                                       | -0.00196809 | 2880.43823 | 577.0949 | 2880.44019 | 577.095337 | 5 | 17 | 19.9367 | 41.90 |
| 3 | 60.89 | 62.89 | 59.3 BTRC_FlexII | 99.0 VVDVNTGEMNTLIHHCEAVLHLR           | Propionamide(C) @17; Label: 13C(6)15N(4)(R) @24                                                       | -0.00196809 | 2880.43823 | 577.0949 | 2880.44019 | 577.095337 | 5 | 17 | 19.9418 | 41.90 |
| 3 | 60.89 | 62.89 | 59.3 BTRC_FlexII | 99.0 VVDVNTGEMNTLIHHCEAVLHLR           | Deamidated(N) @11; Propionamide(C) @17; Label: 13C(6)15N(4)(R) @24                                    | 0.0307698   | 2881.45483 | 721.371  | 2881.42432 | 721.363342 | 4 | 15 | 19.9469 | 41.90 |
| 3 | 60.89 | 62.89 | 59.3 BTRC_FlexII | 99.0 VVDVNTGEMNTLIHHCEAVLHLR           | Propionamide(C) @17; Label: 13C(6)15N(4)(R) @24                                                       | 0.0147817   | 2880.45483 | 721.121  | 2880.44019 | 721.117371 | 4 | 16 | 19.9494 | 41.90 |
| 3 | 60.89 | 62.89 | 59.3 BTRC_FlexII | 99.0 VVNTSTCEFVR                       | Propionamide(C) @7; Label: 13C(6)15N(4)(R) @11                                                        | 0.00161364  | 1421.66528 | 711.8399 | 1421.6637  | 711.839111 | 2 | 13 | 17.2884 | 41.90 |
| 3 | 60.89 | 62.89 | 59.3 BTRC_FlexII | 99.0 VVNTSTCEFVR                       | Propionamide(C) @7; Label: 13C(6)15N(4)(R) @11                                                        | 0.00161364  | 1421.66528 | 711.8399 | 1421.6637  | 711.839111 | 2 | 13 | 17.291  | 41.90 |
| 3 | 60.89 | 62.89 | 59.3 BTRC_FlexII | 99.0 YPTFLYK                           | Label: 13C(6)15N(2)(K) @7                                                                             | -0.00061447 | 938.498657 | 470.2566 | 938.499329 | 470.25628  | 2 | 9  | 17.7815 | 41.90 |
| 4 | 58.58 | 60.58 | 70.0 NET1_FlexII | 99.0 AAIAPFQSAGSPPELQGLPELHEECEGNHPSAR | Propionamide(C) @25; Label: 13C(6)15N(4)(R) @33                                                       | -0.0144536  | 3519.65723 | 880.9216 | 3519.67163 | 880.925171 | 4 | 14 | 17.9807 | 4.38  |
| 4 | 58.58 | 60.58 | 70.0 NET1_FlexII | 99.0 ASTVSSVTQVEVDENAYR                | Label: 13C(6)15N(4)(R) @18                                                                            | -0.00573537 | 1963.93066 | 655.6508 | 1963.93628 | 655.65271  | 3 | 16 | 17.0219 | 4.38  |
| 4 | 58.58 | 60.58 | 70.0 NET1_FlexII | 99.0 AYHDPMLK                          | Label: 13C(6)15N(2)(K) @8                                                                             | -0.0016677  | 981.481506 | 328.1678 | 981.483337 | 328.168396 | 3 | 10 | 15.1737 | 4.38  |
| 4 | 58.58 | 60.58 | 70.0 NET1_FlexII | 99.0 CGSGMQMAEDSK                      | Propionamide(C) @1; Label: 13C(6)15N(2)(K) @12                                                        | 1.58E-05    | 1321.51929 | 661.7669 | 1321.51917 | 661.766907 | 2 | 18 | 14.6477 | 4.38  |
| 4 | 58.58 | 60.58 | 70.0 NET1_FlexII | 99.0 ETLVYPTFLYK                       | Label: 13C(6)15N(2)(K) @11                                                                            | -0.00703446 | 1380.73511 | 691.3748 | 1380.74207 | 691.378296 | 2 | 12 | 19.1047 | 4.38  |
| 4 | 58.58 | 60.58 | 70.0 NET1_FlexII | 99.0 FGQTQISFTLR                       | Label: 13C(6)15N(4)(R) @11                                                                            | 0.00147956  | 1306.69251 | 654.3535 | 1306.69092 | 654.352722 | 2 | 14 | 18.1329 | 4.38  |
| 4 | 58.58 | 60.58 | 70.0 NET1_FlexII | 99.0 FHDPSQAOSHLOANDVFKH               | Label: 13C(6)15N(2)(K) @20                                                                            | -0.00255107 | 2283.08862 | 457.625  | 2283.09131 | 457.625519 | 5 | 13 | 15.7804 | 4.38  |
| 4 | 58.58 | 60.58 | 70.0 NET1_FlexII | 99.0 GEQDLIEDLK                        | Label: 13C(6)15N(2)(K) @10                                                                            | 0.00121942  | 1166.59229 | 584.3034 | 1166.59106 | 584.302795 | 2 | 13 | 17.8014 | 4.38  |
| 4 | 58.58 | 60.58 | 70.0 NET1_FlexII | 99.0 GYCSNQLAAK                        | Propionamide(C) @3; Label: 13C(6)15N(2)(K) @10                                                        | 4.37E-05    | 1132.54273 | 567.2786 | 1132.5426  | 567.278626 | 2 | 10 | 14.6174 | 4.38  |
| 4 | 58.58 | 60.58 | 70.0 NET1_FlexII | 99.0 HSYQVYR                           | Label: 13C(6)15N(4)(R) @7                                                                             | 0.00048725  | 961.465088 | 481.7398 | 961.464539 | 481.739533 | 2 | 11 | 14.1336 | 4.38  |
| 4 | 58.58 | 60.58 | 70.0 NET1_FlexII | 99.0 IGEATKPDGTVEQIGHILVSWLPR          | Label: 13C(6)15N(2)(K) @6; Label: 13C(6)15N(4)(R) @24                                                 | -0.0157082  | 2633.41406 | 659.3608 | 2633.42969 | 659.364685 | 4 | 18 | 20.2772 | 4.38  |
| 4 | 58.58 | 60.58 | 70.0 NET1_FlexII | 99.0 KAYHDPMLK                         | Label: 13C(6)15N(2)(K) @1; Label: 13C(6)15N(2)(K) @9                                                  | -0.00033604 | 1117.59216 | 373.538  | 1117.59253 | 373.538117 | 3 | 10 | 14.247  | 4.38  |
| 4 | 58.58 | 60.58 | 70.0 NET1_FlexII | 99.0 KGESEQCQYIDKLEYLDEK               | Label: 13C(6)15N(2)(K) @1; Propionamide(C) @6; Label: 13C(6)15N(2)(K) @12; Label: 13C(6)15N(2)(K) @19 | 0.00931559  | 2447.17212 | 816.7313 | 2447.16284 | 816.72821  | 3 | 20 | 17.8744 | 4.38  |
| 4 | 58.58 | 60.58 | 70.0 NET1_FlexII | 99.0 KDLWSFLDIPR                       | Label: 13C(6)15N(2)(K) @1; Label: 13C(6)15N(4)(R) @12                                                 | -0.00697632 | 1519.84485 | 760.9297 | 1519.85181 | 760.933167 | 2 | 19 | 20.3708 | 4.38  |
| 4 | 58.58 | 60.58 | 70.0 NET1_FlexII | 99.0 LIMSSEELTHIFGDLDSYIPLHEDLLTR      | Label: 13C(6)15N(4)(R) @29                                                                            | -0.0267101  | 3395.65649 | 849.9214 | 3395.68335 | 849.928162 | 4 | 11 | 20.4822 | 4.38  |
| 4 | 58.58 | 60.58 | 70.0 NET1_FlexII | 99.0 QEAYEMSR                          | Label: 13C(6)15N(4)(R) @9                                                                             | 0.00072913  | 1135.52148 | 568.768  | 1135.52075 | 568.767639 | 2 | 11 | 16.3219 | 4.38  |
| 4 | 58.58 | 60.58 | 70.0 NET1_FlexII | 99.0 QPIPVQELVLEDLQGDVYR               | Gln->pyro-Glu @N-term; Label: 13C(6)15N(4)(R) @19                                                     | -0.0125091  | 2155.09106 | 719.371  | 2155.10352 | 719.375183 | 3 | 21 | 20.584  | 4.38  |
| 4 | 58.58 | 60.58 | 70.0 NET1_FlexII | 99.0 RASTVSSVTQVEVDENAYR               | Label: 13C(6)15N(4)(R) @1; Deamidated(Q) @10; Label: 13C(6)15N(4)(R) @19                              | 0.0379679   | 2131.06787 | 711.3632 | 2131.02954 | 711.350464 | 3 | 11 | 26.7087 | 4.38  |
| 4 | 58.58 | 60.58 | 70.0 NET1_FlexII | 99.0 RQEAYEMSR                         | Label: 13C(6)15N(4)(R) @1; Label: 13C(6)15N(4)(R) @10                                                 | -0.0121421  | 1301.61792 | 434.8799 | 1301.63013 | 434.883972 | 3 | 13 | 15.4847 | 4.38  |
| 4 | 58.58 | 60.58 | 70.0 NET1_FlexII | 99.0 RSSALWSEMLDITMK                   | Label: 13C(6)15N(4)(R) @1; Label: 13C(6)15N(2)(K) @15                                                 | -0.0023267  | 1784.88977 | 595.9705 | 1784.89197 | 595.971252 | 3 | 16 | 19.64   | 4.38  |
| 4 | 58.58 | 60.58 | 70.0 NET1_FlexII | 99.0 SGHKLYFLFQDILVLRPVTR              | Label: 13C(6)15N(2)(K) @4; Label: 13C(6)15N(4)(R) @18; Label: 13C(6)15N(4)(R) @22                     | 0.00815069  | 2643.53418 | 661.8908 | 2643.52588 | 661.888733 | 4 | 11 | 20.4645 | 4.38  |
| 4 | 58.58 | 60.58 | 70.0 NET1_FlexII | 99.0 SSALWSEMLDITMK                    | Label: 13C(6)15N(2)(K) @14                                                                            | -0.00593503 | 1618.77673 | 810.3956 | 1618.78259 | 810.39856  | 2 | 19 | 20.3632 | 4.38  |
| 4 | 58.58 | 60.58 | 70.0 NET1_FlexII | 99.0 STVPTPAK                          | Label: 13C(6)15N(2)(K) @8                                                                             | 0.00688847  | 807.465088 | 404.7398 | 807.458191 | 404.736359 | 2 | 8  | 13.9276 | 4.38  |
| 4 | 58.58 | 60.58 | 70.0 NET1_FlexII | 99.0 THQTQPGIR                         | Label: 13C(6)15N(4)(R) @9                                                                             | -0.00140317 | 1046.54822 | 349.8567 | 1046.54968 | 349.857178 | 3 | 7  | 9.6209  | 4.38  |
| 4 | 58.58 | 60.58 | 70.0 NET1_FlexII | 99.0 VLDVNNQSFYR                       | Label: 13C(6)15N(4)(R) @10                                                                            | 0.00072046  | 1200.61353 | 601.314  | 1200.61267 | 601.313599 | 2 | 12 | 16.4118 | 4.38  |
| 4 | 58.58 | 60.58 | 70.0 NET1_FlexII | 99.0 VLLGHGELR                         | Propionamide(C) @4; Label: 13C(6)15N(4)(R) @9                                                         | 0.00166781  | 1119.61145 | 560.813  | 1119.60986 | 560.812195 | 2 | 13 | 15.7555 | 4.38  |
| 4 | 58.58 | 60.58 | 70.0 NET1_FlexII | 99.0 VTSLANLISPVYR                     | Label: 13C(6)15N(4)(R) @12                                                                            | 0.00127497  | 1278.75464 | 640.3846 | 1278.75354 | 640.384033 | 2 | 12 | 18.7732 | 4.38  |
| 4 | 58.58 | 60.58 | 70.0 NET1_FlexII | 99.0 YPLLLK                            | Label: 13C(6)15N(2)(K) @6                                                                             | -0.00075676 | 753.487244 | 377.7509 | 753.488037 | 377.751282 | 2 | 8  | 17.8592 | 4.38  |
| 4 | 58.58 | 60.58 | 70.0 NET1_FlexII | 99.0 AAIAPFQSAGSPPELQGLPELHEECEGNHPSAR | Propionamide(C) @25; Label: 13C(6)15N(4)(R) @33                                                       | 0.00532188  | 3519.677   | 880.9265 | 3519.67163 | 880.925171 | 4 | 15 | 17.9503 | 4.38  |
| 4 | 58.58 | 60.58 | 70.0 NET1_FlexII | 99.0 AAIAPFQSAGSPPELQGLPELHEECEGNHPSAR | Propionamide(C) @25; Label: 13C(6)15N(4)(R) @33                                                       | 0.00532188  | 3519.677   | 880.9265 | 3519.67163 | 880.925171 | 4 | 15 | 17.9554 | 4.38  |
| 4 | 58.58 | 60.58 | 70.0 NET1_FlexII | 99.0 ASTVSSVTQVEVDENAYR                | Label: 13C(6)15N(4)(R) @18                                                                            | 0.00592018  | 1963.94202 | 982.9783 | 1963.93628 | 982.975403 | 2 | 21 | 16.9181 | 4.38  |
| 4 | 58.58 | 60.58 | 70.0 NET1_FlexII | 99.0 ASTVSSVTQVEVDENAYR                | Label: 13C(6)15N(4)(R) @18                                                                            | 0.00592018  | 1963.94202 | 982.9783 | 1963.93628 | 982.975403 | 2 | 25 | 16.9207 | 4.38  |
| 4 | 58.58 | 60.58 | 70.0 NET1_FlexII | 99.0 ASTVSSVTQVEVDENAYR                | Label: 13C(6)15N(4)(R) @18                                                                            | 0.0131224   | 1963.94922 | 982.9819 | 1963.93628 | 982.975403 | 2 | 12 | 26.576  | 4.38  |
| 4 | 58.58 | 60.58 | 70.0 NET1_FlexII | 99.0 ASTVSSVTQVEVDENAYR                | Deamidated(Q) @9; Label: 13C(6)15N(4)(R) @18                                                          | 0.0291105   | 1964.94922 | 983.4819 | 1964.92029 | 983.467407 | 2 | 11 | 26.5837 | 4.38  |
| 4 | 58.58 | 60.58 | 70.0 NET1_FlexII | 99.0 AYHDPMLK                          | Label: 13C(6)15N(2)(K) @8                                                                             | -0.00139304 | 981.481873 | 328.1679 | 981.483337 | 328.168396 | 3 | 10 | 15.0961 | 4.38  |
| 4 | 58.58 | 60.58 | 70.0 NET1_FlexII | 99.0 AYHDPMLK                          | Label: 13C(6)15N(2)(K) @8                                                                             | -0.00102903 | 981.4823   | 491.7484 | 981.483337 | 491.748932 | 2 | 11 | 15.2494 | 4.38  |
| 4 | 58.58 | 60.58 | 70.0 NET1_FlexII | 99.0 CGSGMQMAEDSK                      | Propionamide(C) @1; Label: 13C(6)15N(2)(K) @12                                                        | 0.00782832  | 1321.5271  | 661.7708 | 1321.51917 | 661.766907 | 2 | 18 | 14.62   | 4.38  |
| 4 | 58.58 | 60.58 | 70.0 NET1_FlexII | 99.0 CGSGMQMAEDSK                      | Propionamide(C) @1; Label: 13C(6)15N(2)(K) @12                                                        | 0.00074821  | 1321.52002 | 661.7673 | 1321.51917 | 661.766907 | 2 | 15 | 14.6828 | 4.    |

|   |       |       |                   |                               |                                                                                                                 |                             |             |            |          |            |            |   |    |         |       |
|---|-------|-------|-------------------|-------------------------------|-----------------------------------------------------------------------------------------------------------------|-----------------------------|-------------|------------|----------|------------|------------|---|----|---------|-------|
| 4 | 58.58 | 60.58 | 70.0 NET1_FlexIII | 99.0 FGQTQSFTRL               | Label:13C(6)15N(4)(R)@11                                                                                        |                             | 0.00160163  | 1306.69251 | 654.3535 | 1306.69092 | 654.352722 | 2 | 14 | 18.0999 | 4.38  |
| 4 | 58.58 | 60.58 | 70.0 NET1_FlexIII | 99.0 FGQTQSFTRL               | Label:13C(6)15N(4)(R)@11                                                                                        |                             | 0.00160163  | 1306.69251 | 654.3535 | 1306.69092 | 654.352722 | 2 | 14 | 18.1024 | 4.38  |
| 4 | 58.58 | 60.58 | 70.0 NET1_FlexIII | 99.0 FHDPSPAQSHLTQANDVFHK     | Deamidated(Q)@8; Label:13C(6)15N(2)(K)@20                                                                       |                             | 0.0175242   | 2284.09302 | 572.0305 | 2284.0752  | 572.026062 | 4 | 15 | 15.7229 | 4.38  |
| 4 | 58.58 | 60.58 | 70.0 NET1_FlexIII | 99.0 FHDPSPAQSHLTQANDVFHK     | Label:13C(6)15N(2)(K)@20                                                                                        |                             | 0.00153609  | 2283.09302 | 571.7805 | 2283.09131 | 571.78009  | 4 | 17 | 15.728  | 4.38  |
| 4 | 58.58 | 60.58 | 70.0 NET1_FlexIII | 99.0 FHDPSPAQSHLTQANDVFHK     | Label:13C(6)15N(2)(K)@20                                                                                        |                             | 0.00153609  | 2283.09302 | 571.7805 | 2283.09131 | 571.78009  | 4 | 14 | 15.7482 | 4.38  |
| 4 | 58.58 | 60.58 | 70.0 NET1_FlexIII | 99.0 FHDPSPAQSHLTQANDVFHK     | Label:13C(6)15N(2)(K)@20                                                                                        |                             | 0.00263252  | 2283.09399 | 762.0386 | 2283.09131 | 762.037659 | 3 | 17 | 15.7632 | 4.38  |
| 4 | 58.58 | 60.58 | 70.0 NET1_FlexIII | 99.0 FHDPSPAQSHLTQANDVFHK     | Label:13C(6)15N(2)(K)@20                                                                                        |                             | 0.00263252  | 2283.09399 | 762.0386 | 2283.09131 | 762.037659 | 3 | 18 | 15.7707 | 4.38  |
| 4 | 58.58 | 60.58 | 70.0 NET1_FlexIII | 99.0 FHDPSPAQSHLTQANDVFHK     | Label:13C(6)15N(2)(K)@20                                                                                        |                             | 0.00263252  | 2283.09399 | 762.0386 | 2283.09131 | 762.037659 | 3 | 15 | 15.7732 | 4.38  |
| 4 | 58.58 | 60.58 | 70.0 NET1_FlexIII | 99.0 FHDPSPAQSHLTQANDVFHK     | Label:13C(6)15N(2)(K)@20                                                                                        |                             | -0.00255107 | 2283.08862 | 457.625  | 2283.09131 | 457.625519 | 5 | 13 | 15.7829 | 4.38  |
| 4 | 58.58 | 60.58 | 70.0 NET1_FlexIII | 99.0 FHDPSPAQSHLTQANDVFHK     | Label:13C(6)15N(2)(K)@20                                                                                        |                             | 0.00055953  | 2283.0918  | 571.7802 | 2283.09131 | 571.78009  | 4 | 13 | 15.8029 | 4.38  |
| 4 | 58.58 | 60.58 | 70.0 NET1_FlexIII | 99.0 FHDPSPAQSHLTQANDVFHK     | Label:13C(6)15N(2)(K)@20                                                                                        |                             | -0.00010966 | 2283.09106 | 457.6255 | 2283.09131 | 457.625519 | 5 | 13 | 15.8227 | 4.38  |
| 4 | 58.58 | 60.58 | 70.0 NET1_FlexIII | 99.0 GEQDLIEDLK               | Label:13C(6)15N(2)(K)@10                                                                                        |                             | 0.00121942  | 1166.59229 | 584.3034 | 1166.59106 | 584.302795 | 2 | 13 | 17.809  | 4.38  |
| 4 | 58.58 | 60.58 | 70.0 NET1_FlexIII | 99.0 GYCNSQLAAK               | Propionamide(C)@3; Label:13C(6)15N(2)(K)@10                                                                     |                             | 0.00065409  | 1132.54321 | 567.2789 | 1132.5426  | 567.278626 | 2 | 11 | 14.6452 | 4.38  |
| 4 | 58.58 | 60.58 | 70.0 NET1_FlexIII | 99.0 HSYQVYR                  | Label:13C(6)15N(4)(R)@7                                                                                         |                             | 0.0007314   | 961.465271 | 481.7399 | 961.464539 | 481.739533 | 2 | 11 | 14.2167 | 4.38  |
| 4 | 58.58 | 60.58 | 70.0 NET1_FlexIII | 99.0 IGEATKPDGTVEQIGHILVSWLPR | Label:13C(6)15N(2)(K)@6; Deamidated(Q)@13; Label:13C(6)15N(4)(R)@24                                             |                             | 0.00027991  | 2634.41406 | 659.6108 | 2634.41357 | 659.610657 | 4 | 13 | 20.267  | 4.38  |
| 4 | 58.58 | 60.58 | 70.0 NET1_FlexIII | 99.0 IGEATKPDGTVEQIGHILVSWLPR | Label:13C(6)15N(2)(K)@6; Deamidated(Q)@13; Label:13C(6)15N(4)(R)@24                                             |                             | 0.0193818   | 2634.43311 | 879.1516 | 2634.43157 | 879.145142 | 3 | 20 | 20.2897 | 4.38  |
| 4 | 58.58 | 60.58 | 70.0 NET1_FlexIII | 99.0 IGEATKPDGTVEQIGHILVSWLPR | Label:13C(6)15N(2)(K)@6; Label:13C(6)15N(4)(R)@24                                                               |                             | -0.00887229 | 2633.4209  | 659.3625 | 2633.42969 | 659.364685 | 4 | 20 | 20.2948 | 4.38  |
| 4 | 58.58 | 60.58 | 70.0 NET1_FlexIII | 99.0 IGEATKPDGTVEQIGHILVSWLPR | Label:13C(6)15N(2)(K)@6; Label:13C(6)15N(4)(R)@24                                                               |                             | -0.0071655  | 2633.42261 | 878.8148 | 2633.42969 | 878.817139 | 3 | 24 | 20.2974 | 4.38  |
| 4 | 58.58 | 60.58 | 70.0 NET1_FlexIII | 99.0 IGEATKPDGTVEQIGHILVSWLPR | Label:13C(6)15N(2)(K)@6; Label:13C(6)15N(4)(R)@24                                                               |                             | -0.0071655  | 2633.42261 | 878.8148 | 2633.42969 | 878.817139 | 3 | 24 | 20.305  | 4.38  |
| 4 | 58.58 | 60.58 | 70.0 NET1_FlexIII | 99.0 IGEATKPDGTVEQIGHILVSWLPR | Label:13C(6)15N(2)(K)@6; Label:13C(6)15N(4)(R)@24                                                               |                             | -0.00887229 | 2633.4209  | 659.3625 | 2633.42969 | 659.364685 | 4 | 21 | 20.3227 | 4.38  |
| 4 | 58.58 | 60.58 | 70.0 NET1_FlexIII | 99.0 KGESEQCQYIDKLEYLDEK      | Label:13C(6)15N(2)(K)@1; Propionamide(C)@6; Deamidated(Q)@7; Label:13C(6)15N(2)(K)@12; Label:13C(6)15N(2)(K)@19 | missed K-G@1; missed K-L@12 | 0.015355    | 2448.16211 | 817.0613 | 2448.14697 | 817.056213 | 3 | 15 | 17.7917 | 4.38  |
| 4 | 58.58 | 60.58 | 70.0 NET1_FlexIII | 99.0 KGESEQCQYIDKLEYLDEK      | Label:13C(6)15N(2)(K)@1; Propionamide(C)@6; Deamidated(Q)@7; Label:13C(6)15N(2)(K)@12; Label:13C(6)15N(2)(K)@19 | missed K-G@1; missed K-L@12 | 0.0263436   | 2448.17334 | 813.0506 | 2448.14697 | 813.044006 | 4 | 14 | 17.8844 | 4.38  |
| 4 | 58.58 | 60.58 | 70.0 NET1_FlexIII | 99.0 KLDLWSFLDIPR             | Label:13C(6)15N(2)(K)@1; Label:13C(6)15N(4)(R)@12                                                               | missed K-L@1                | -0.00404663 | 1519.8479  | 760.9312 | 1519.85181 | 760.933167 | 2 | 19 | 20.3101 | 4.38  |
| 4 | 58.58 | 60.58 | 70.0 NET1_FlexIII | 99.0 KLDLWSFLDIPR             | Label:13C(6)15N(2)(K)@1; Label:13C(6)15N(4)(R)@12                                                               | missed K-L@1                | -0.00605859 | 1519.8457  | 507.6225 | 1519.85181 | 507.624542 | 3 | 13 | 20.3252 | 4.38  |
| 4 | 58.58 | 60.58 | 70.0 NET1_FlexIII | 99.0 KLDLWSFLDIPR             | Label:13C(6)15N(2)(K)@1; Label:13C(6)15N(4)(R)@12                                                               | missed K-L@1                | -0.00605859 | 1519.8457  | 507.6225 | 1519.85181 | 507.624542 | 3 | 12 | 20.3277 | 4.38  |
| 4 | 58.58 | 60.58 | 70.0 NET1_FlexIII | 99.0 KLDLWSFLDIPR             | Label:13C(6)15N(2)(K)@1; Label:13C(6)15N(4)(R)@12                                                               | missed K-L@1                | -0.00502319 | 1519.84692 | 760.9307 | 1519.85181 | 760.933167 | 2 | 19 | 20.3328 | 4.38  |
| 4 | 58.58 | 60.58 | 70.0 NET1_FlexIII | 99.0 KLDLWSFLDIPR             | Label:13C(6)15N(2)(K)@1; Label:13C(6)15N(4)(R)@12                                                               | missed K-L@1                | -0.00697412 | 1519.84473 | 507.6222 | 1519.85181 | 507.624542 | 3 | 13 | 20.3606 | 4.38  |
| 4 | 58.58 | 60.58 | 70.0 NET1_FlexIII | 99.0 QPVPQVELVLEDLQDGDVR      | Deamidated(Q)@1; Label:13C(6)15N(4)(R)@19                                                                       |                             | 0.0158708   | 2173.1294  | 1087.572 | 2173.11426 | 1087.56433 | 2 | 16 | 19.8532 | 4.38  |
| 4 | 58.58 | 60.58 | 70.0 NET1_FlexIII | 99.0 QPVPQVELVLEDLQDGDVR      | Label:13C(6)15N(4)(R)@19                                                                                        |                             | -0.00011737 | 2172.1294  | 1087.072 | 2172.13013 | 1087.07239 | 2 | 19 | 19.8683 | 4.38  |
| 4 | 58.58 | 60.58 | 70.0 NET1_FlexIII | 99.0 QPVPQVELVLEDLQDGDVR      | Deamidated(Q)@6; Label:13C(6)15N(4)(R)@19                                                                       |                             | 0.00702287  | 2173.12109 | 725.381  | 2173.11426 | 725.378662 | 3 | 15 | 19.8989 | 4.38  |
| 4 | 58.58 | 60.58 | 70.0 NET1_FlexIII | 99.0 QPVPQVELVLEDLQDGDVR      | Label:13C(6)15N(4)(R)@19                                                                                        |                             | -0.00798872 | 2172.12207 | 725.048  | 2172.13013 | 725.050659 | 3 | 21 | 19.9396 | 4.38  |
| 4 | 58.58 | 60.58 | 70.0 NET1_FlexIII | 99.0 QPVPQVELVLEDLQDGDVR      | Label:13C(6)15N(4)(R)@19                                                                                        |                             | 0.00098348  | 2172.13135 | 725.051  | 2172.13013 | 725.050659 | 3 | 20 | 20.1375 | 4.38  |
| 4 | 58.58 | 60.58 | 70.0 NET1_FlexIII | 99.0 QPVPQVELVLEDLQDGDVR      | Gln->pyro-Glu@N-term; Label:13C(6)15N(4)(R)@19                                                                  |                             | -0.00244045 | 2155.10132 | 1078.558 | 2155.10352 | 1078.55908 | 2 | 22 | 20.5076 | 4.38  |
| 4 | 58.58 | 60.58 | 70.0 NET1_FlexIII | 99.0 QPVPQVELVLEDLQDGDVR      | Gln->pyro-Glu@N-term; Label:13C(6)15N(4)(R)@19                                                                  |                             | -0.00244045 | 2155.10132 | 1078.558 | 2155.10352 | 1078.55908 | 2 | 23 | 20.5127 | 4.38  |
| 4 | 58.58 | 60.58 | 70.0 NET1_FlexIII | 99.0 QPVPQVELVLEDLQDGDVR      | Gln->pyro-Glu@N-term; Label:13C(6)15N(4)(R)@19                                                                  |                             | -0.00244045 | 2155.10132 | 1078.558 | 2155.10352 | 1078.55908 | 2 | 22 | 20.5382 | 4.38  |
| 4 | 58.58 | 60.58 | 70.0 NET1_FlexIII | 99.0 QPVPQVELVLEDLQDGDVR      | Gln->pyro-Glu@N-term; Label:13C(6)15N(4)(R)@19                                                                  |                             | -0.00390529 | 2155.09937 | 1078.557 | 2155.10352 | 1078.55908 | 2 | 18 | 20.5815 | 4.38  |
| 4 | 58.58 | 60.58 | 70.0 NET1_FlexIII | 99.0 QPVPQVELVLEDLQDGDVR      | Gln->pyro-Glu@N-term; Label:13C(6)15N(4)(R)@19                                                                  |                             | -0.00366115 | 2155.09937 | 1078.557 | 2155.10352 | 1078.55908 | 2 | 15 | 20.6246 | 4.38  |
| 4 | 58.58 | 60.58 | 70.0 NET1_FlexIII | 99.0 QPVPQVELVLEDLQDGDVR      | Deamidated(Q)@6; Label:13C(6)15N(4)(R)@19                                                                       |                             | 0.0158708   | 2173.1294  | 1087.572 | 2173.11426 | 1087.56433 | 2 | 16 | 20.6629 | 4.38  |
| 4 | 58.58 | 60.58 | 70.0 NET1_FlexIII | 99.0 QPVPQVELVLEDLQDGDVR      | Label:13C(6)15N(4)(R)@19                                                                                        |                             | -0.00011737 | 2172.1294  | 1087.072 | 2172.13013 | 1087.07239 | 2 | 15 | 20.668  | 4.38  |
| 4 | 58.58 | 60.58 | 70.0 NET1_FlexIII | 99.0 QPVPQVELVLEDLQDGDVR      | Gln->pyro-Glu@N-term; Label:13C(6)15N(4)(R)@19                                                                  |                             | -0.0021963  | 2155.10132 | 1078.558 | 2155.10352 | 1078.55908 | 2 | 21 | 20.7773 | 4.38  |
| 4 | 58.58 | 60.58 | 70.0 NET1_FlexIII | 99.0 RQEAIEMSR                | Label:13C(6)15N(4)(R)@1; Label:13C(6)15N(4)(R)@10                                                               | missed R-Q@1                | -0.0031721  | 1301.62683 | 651.8207 | 1301.63013 | 651.822327 | 2 | 17 | 15.4872 | 4.38  |
| 4 | 58.58 | 60.58 | 70.0 NET1_FlexIII | 99.0 RQEAIEMSR                | Label:13C(6)15N(4)(R)@1; Label:13C(6)15N(4)(R)@10                                                               | missed R-Q@1                | 0.00076689  | 1301.63074 | 434.8842 | 1301.63013 | 434.883972 | 3 | 13 | 15.5046 | 4.38  |
| 4 | 58.58 | 60.58 | 70.0 NET1_FlexIII | 99.0 RQEAIEMSR                | Label:13C(6)15N(4)(R)@1; Label:13C(6)15N(4)(R)@10                                                               | missed R-Q@1                | 0.00076689  | 1301.63074 | 434.8842 | 1301.63013 | 434.883972 | 3 | 13 | 15.5121 | 4.38  |
| 4 | 58.58 | 60.58 | 70.0 NET1_FlexIII | 99.0 RQEAIEMSR                | Label:13C(6)15N(4)(R)@1; Label:13C(6)15N(4)(R)@10                                                               | missed R-Q@1                | 0.0018328   | 1301.63184 | 651.8232 | 1301.63013 | 651.822327 | 2 | 17 | 15.5424 | 4.38  |
| 4 | 58.58 | 60.58 | 70.0 NET1_FlexIII | 99.0 SSALWSEMLDITMK           | Label:13C(6)15N(2)(K)@14                                                                                        |                             | -0.00593503 | 1618.77673 | 810.3956 | 1618.78259 | 810.39856  | 2 | 18 | 20.3581 | 4.38  |
| 4 | 58.58 | 60.58 | 70.0 NET1_FlexIII | 99.0 SSALWSEMLDITMK           | Label:13C(6)15N(2)(K)@14                                                                                        |                             | -0.00508053 | 1618.77771 | 810.3961 | 1618.78259 | 810.39856  | 2 | 18 | 20.3885 | 4.38  |
| 4 | 58.58 | 60.58 | 70.0 NET1_FlexIII | 99.0 SSALWSEMLDITMK           | Label:13C(6)15N(2)(K)@14                                                                                        |                             | -0.00532467 | 1618.77722 | 810.3959 | 1618.78259 | 810.39856  | 2 | 15 | 20.4239 | 4.38  |
| 4 | 58.58 | 60.58 | 70.0 NET1_FlexIII | 99.0 SSALWSEMLDITMK           | Label:13C(6)15N(2)(K)@14                                                                                        |                             | 0.00553962  | 1618.78833 | 810.4014 | 1618.78259 | 810.39856  | 2 | 12 | 26.5366 | 4.38  |
| 4 | 58.58 | 60.58 | 70.0 NET1_FlexIII | 99.0 VLDVNNQSFRR              | Label:13C(6)15N(4)(R)@10                                                                                        |                             | 0.0587041   | 1200.67151 | 601.343  | 1200.61267 | 601.313599 | 2 | 11 | 16.3972 | 4.38  |
| 4 | 58.58 | 60.58 | 70.0 NET1_FlexIII | 99.0 VLDVNNQSFRR              | Label:13C(6)15N(4)(R)@10                                                                                        |                             | 0.00072046  | 1200.61353 | 601.314  | 1200.61267 | 601.313599 | 2 | 11 | 16.4095 | 4.38  |
| 4 | 58.58 | 60.58 | 70.0 NET1_FlexIII | 99.0 VLDVNNQSFRR              | Label:13C(6)15N(4)(R)@10                                                                                        |                             | 0.00084253  | 1200.61353 | 601.314  | 1200.61267 | 601.313599 | 2 | 11 | 16.4471 | 4.38  |
| 4 | 58.58 | 60.58 | 70.0 NET1_FlexIII | 99.0 VLLCHGELR                | Propionamide(C)@4; Label:13C(6)15N(4)(R)@9                                                                      |                             | 0.00166781  | 1119.61145 | 560.813  | 1119.60986 | 560.812195 | 2 | 13 | 15.7457 | 4.38  |
| 4 | 58.58 | 60.58 | 70.0 NET1_FlexIII | 99.0 VTSLANLISPVRR            | Label:13C(6)15N(4)(R)@12                                                                                        |                             | 0.00127497  | 1278.75464 | 640.3846 | 1278.75354 | 640.384033 | 2 | 13 | 18.7808 | 4.38  |
| 4 | 58.58 | 60.58 | 70.0 NET1_FlexIII | 99.0 VTSLANLISPVRR            | Label:13C(6)15N(4)(R)@12                                                                                        |                             | 0.00188532  | 1278.75525 | 640.3849 | 1278.75354 | 640.384033 | 2 | 12 | 18.8061 | 4.38  |
| 4 | 58.58 | 60.58 | 70.0 NET1_FlexIII | 99.0 VTSLANLISPVRR            | Label:13C(6)15N(4)(R)@12                                                                                        |                             | 0.00188532  | 1278.75525 | 640.3849 | 1278.75354 | 640.384033 | 2 | 12 | 18.8339 | 4.38  |
| 4 | 58.58 | 60.58 | 70.0 NET1_FlexIII | 99.0 YPLLLK                   | Label:13C(6)15N(2)(K)@6                                                                                         |                             | -0.00075676 | 753.487244 | 377.7509 | 753.488037 | 377.751282 | 2 | 7  | 17.8568 | 4.38  |
| 4 | 58.58 | 60.58 | 70.0 NET1_FlexIII | 99.0 YPTFLYK                  | Label:13C(6)15N(2)(K)@7                                                                                         | cleaved V-Y@N-term          | -0.00061447 | 938.498657 | 470.2566 | 938.499329 | 470.256928 | 2 | 9  | 17.7815 | 4.38  |
| 5 | 56.01 | 58.01 | 69.8 PDK1_FlexIII | 99.0 AIYDFTDTVIR              | Label:13C(6)15N(4)(R)@11                                                                                        |                             | 0.00019009  | 1322.67493 | 662.3447 | 1322.67456 | 662.344544 | 2 | 11 | 18.4123 | 33.22 |
| 5 | 56.01 | 58.01 | 69.8 PDK1_FlexIII | 99.0 ALSTDIER                 | Label:13C(6)15N(4)(R)@9                                                                                         |                             | -0.00212902 | 1000.50427 | 501.2594 | 1000.50647 | 501.260498 | 2 | 9  | 15.2179 | 33.22 |
| 5 | 56.01 | 58.01 | 69.8 PDK1_FlexIII | 99.0 AVPLAGFYGYLPISR          | Label:13C(6)                                                                                                    |                             |             |            |          |            |            |   |    |         |       |

|   |       |       |                  |                              |                                                                                         |                    |             |            |          |            |            |   |    |         |       |
|---|-------|-------|------------------|------------------------------|-----------------------------------------------------------------------------------------|--------------------|-------------|------------|----------|------------|------------|---|----|---------|-------|
| 5 | 56.01 | 58.01 | 69.8_PDK1_FlexII | 99.0_HIGSINPNCNVLEVIKDGYENAR | Propionamide(C)@9; Deamidated(N)@10; Label:13C(6)15N(2)(K)@16; Label:13C(6)15N(4)(R)@23 | missed K-D@16      | 0.0310138   | 2644.33447 | 882.4521 | 2644.30347 | 882.441773 | 3 | 14 | 18.4476 | 33.22 |
| 5 | 56.01 | 58.01 | 69.8_PDK1_FlexII | 99.0_HNDVIPTMAQGVIEWK        | Label:13C(6)15N(2)(K)@16                                                                |                    | 0.00238472  | 1821.91992 | 608.3139 | 1821.91748 | 608.31311  | 3 | 22 | 17.7044 | 33.22 |
| 5 | 56.01 | 58.01 | 69.8_PDK1_FlexII | 99.0_HYNTNHEADDWCVPSR        | Propionamide(C)@12; Label:13C(6)15N(4)(R)@16                                            |                    | 0.00052039  | 2023.84778 | 506.9692 | 2023.84705 | 506.969025 | 4 | 13 | 15.5938 | 33.22 |
| 5 | 56.01 | 58.01 | 69.8_PDK1_FlexII | 99.0_HYNTNHEADDWCVPSREP      | Propionamide(C)@12; Label:13C(6)15N(4)(R)@16; Label:13C(6)15N(2)(K)@19                  | missed R-E@16      | -0.00019279 | 2386.05127 | 597.5201 | 2386.05151 | 597.520142 | 4 | 15 | 15.16   | 33.22 |
| 5 | 56.01 | 58.01 | 69.8_PDK1_FlexII | 99.0_KHIGSINPNCNVLEVIK       | Label:13C(6)15N(2)(K)@1; Propionamide(C)@10; Label:13C(6)15N(2)(K)@17                   | missed K-H@1       | 0.00057582  | 1964.08533 | 655.7024 | 1964.08484 | 655.70221  | 3 | 19 | 17.1919 | 33.22 |
| 5 | 56.01 | 58.01 | 69.8_PDK1_FlexII | 99.0_LCDLYINSPELELEELNAK     | Propionamide(C)@2; Label:13C(6)15N(2)(K)@20                                             |                    | -0.00784939 | 2447.19336 | 1224.604 | 2447.20215 | 1224.6084  | 2 | 20 | 19.4991 | 33.22 |
| 5 | 56.01 | 58.01 | 69.8_PDK1_FlexII | 99.0_LFNWYSTAPRPR            | Label:13C(6)15N(4)(R)@11; Label:13C(6)15N(4)(R)@13                                      |                    | -0.00556567 | 1634.80872 | 818.4116 | 1634.81421 | 818.414368 | 2 | 16 | 17.1692 | 33.22 |
| 5 | 56.01 | 58.01 | 69.8_PDK1_FlexII | 99.0_LYAQYFGQDLK             | Label:13C(6)15N(2)(K)@11                                                                |                    | 0.00195601  | 1352.68762 | 677.3511 | 1352.68555 | 677.350098 | 2 | 14 | 17.7598 | 33.22 |
| 5 | 56.01 | 58.01 | 69.8_PDK1_FlexII | 99.0_LYSLEGYGTDAVIYK         | Label:13C(6)15N(2)(K)@16                                                                |                    | 0.00623099  | 1811.94983 | 906.9822 | 1811.94373 | 906.979126 | 2 | 7  | 26.4639 | 33.22 |
| 5 | 56.01 | 58.01 | 69.8_PDK1_FlexII | 99.0_MLLNQHSLFGGK            | Label:13C(6)15N(2)(K)@13                                                                |                    | -0.00143803 | 1464.79895 | 489.2736 | 1464.80029 | 489.274017 | 3 | 13 | 18.0739 | 33.22 |
| 5 | 56.01 | 58.01 | 69.8_PDK1_FlexII | 99.0_NRHNDVIPTMAQGVIEYK      | Label:13C(6)15N(4)(R)@2; Label:13C(6)15N(2)(K)@18                                       | missed R-H@2       | 0.00037357  | 2102.07007 | 526.5248 | 2102.06982 | 526.524719 | 4 | 15 | 17.3505 | 33.22 |
| 5 | 56.01 | 58.01 | 69.8_PDK1_FlexII | 99.0_QFLDFGSVNACEK           | Gln->pyro-Glu@N-term; Propionamide(C)@11; Label:13C(6)15N(2)(K)@13                      |                    | -0.00318506 | 1518.68726 | 760.3509 | 1518.69043 | 760.352478 | 2 | 18 | 19.8391 | 33.22 |
| 5 | 56.01 | 58.01 | 69.8_PDK1_FlexII | 99.0_RLCDLYINSPELEELNAK      | Label:13C(6)15N(4)(R)@1; Propionamide(C)@3; Label:13C(6)15N(2)(K)@21                    | missed R-L@1       | -0.00397879 | 2613.30762 | 872.1098 | 2613.31152 | 872.111145 | 3 | 22 | 19.0224 | 33.22 |
| 5 | 56.01 | 58.01 | 69.8_PDK1_FlexII | 99.0_SAYPTFLYK               | Label:13C(6)15N(2)(K)@9                                                                 |                    | 0.00014741  | 1096.56873 | 549.2916 | 1096.56848 | 549.291504 | 2 | 9  | 17.8966 | 33.22 |
| 5 | 56.01 | 58.01 | 69.8_PDK1_FlexII | 99.0_SFSSDSGSSPASER          | Label:13C(6)15N(4)(R)@14                                                                |                    | 0.00247595  | 1409.59583 | 705.8052 | 1409.59338 | 705.804016 | 2 | 16 | 14.1086 | 33.22 |
| 5 | 56.01 | 58.01 | 69.8_PDK1_FlexII | 99.0_SPGQPIQVYVPSHLYHMFELFK  | Label:13C(6)15N(2)(K)@24                                                                |                    | -0.0166323  | 2822.4541  | 706.6208 | 2822.47095 | 706.625    | 4 | 18 | 20.5505 | 33.22 |
| 5 | 56.01 | 58.01 | 69.8_PDK1_FlexII | 99.0_TPSVQLQSVWYIQLSQELDFDK  | Label:13C(6)15N(2)(K)@22; Label:13C(6)15N(2)(K)@24                                      | missed K-D@22      | 0.00160169  | 2880.52612 | 961.1826 | 2880.52441 | 961.182068 | 3 | 25 | 20.553  | 33.22 |
| 5 | 56.01 | 58.01 | 69.8_PDK1_FlexII | 99.0_TSFMLR                  | Label:13C(6)15N(4)(R)@7                                                                 |                    | -0.0017572  | 910.45929  | 456.2369 | 910.460999 | 456.237793 | 2 | 8  | 18.7563 | 33.22 |
| 5 | 56.01 | 58.01 | 69.8_PDK1_FlexII | 99.0_AYDFTDTVIR              | Label:13C(6)15N(4)(R)@11                                                                |                    | 0.00019009  | 1322.67493 | 662.3447 | 1322.67456 | 662.344544 | 2 | 11 | 18.4072 | 33.22 |
| 5 | 56.01 | 58.01 | 69.8_PDK1_FlexII | 99.0_AYDFTDTVIR              | Label:13C(6)15N(4)(R)@11                                                                |                    | 0.00019009  | 1322.67493 | 662.3447 | 1322.67456 | 662.344544 | 2 | 11 | 18.4148 | 33.22 |
| 5 | 56.01 | 58.01 | 69.8_PDK1_FlexII | 99.0_AYDFTDTVIR              | Label:13C(6)15N(4)(R)@11                                                                |                    | 0.00153288  | 1322.67603 | 662.3453 | 1322.67456 | 662.344544 | 2 | 9  | 18.5693 | 33.22 |
| 5 | 56.01 | 58.01 | 69.8_PDK1_FlexII | 99.0_ALSTDIER                | Label:13C(6)15N(4)(R)@9                                                                 |                    | -0.00054209 | 1000.50586 | 501.2602 | 1000.50647 | 501.260498 | 2 | 10 | 15.2455 | 33.22 |
| 5 | 56.01 | 58.01 | 69.8_PDK1_FlexII | 99.0_ALSTDIER                | Label:13C(6)15N(4)(R)@9                                                                 |                    | -0.0007252  | 1000.50568 | 501.2601 | 1000.50647 | 501.260498 | 2 | 9  | 15.2802 | 33.22 |
| 5 | 56.01 | 58.01 | 69.8_PDK1_FlexII | 99.0_AVPLAGFGYGLPISR         | Label:13C(6)15N(4)(R)@15                                                                |                    | -0.00674877 | 1526.84192 | 764.4282 | 1526.84851 | 764.431519 | 2 | 20 | 19.2078 | 33.22 |
| 5 | 56.01 | 58.01 | 69.8_PDK1_FlexII | 99.0_AVPLAGFGYGLPISR         | Label:13C(6)15N(4)(R)@15                                                                |                    | -0.00674877 | 1526.84192 | 764.4282 | 1526.84851 | 764.431519 | 2 | 20 | 19.2256 | 33.22 |
| 5 | 56.01 | 58.01 | 69.8_PDK1_FlexII | 99.0_AVPLAGFGYGLPISR         | Label:13C(6)15N(4)(R)@15                                                                |                    | -0.00674877 | 1526.84192 | 764.4282 | 1526.84851 | 764.431519 | 2 | 19 | 19.2332 | 33.22 |
| 5 | 56.01 | 58.01 | 69.8_PDK1_FlexII | 99.0_AVPLAGFGYGLPISR         | Label:13C(6)15N(4)(R)@15                                                                |                    | -0.0074812  | 1526.84106 | 764.4278 | 1526.84851 | 764.431519 | 2 | 16 | 19.2585 | 33.22 |
| 5 | 56.01 | 58.01 | 69.8_PDK1_FlexII | 99.0_AVPLAGFGYGLPISR         | Label:13C(6)15N(4)(R)@15                                                                |                    | -0.0107086  | 1526.83777 | 509.9532 | 1526.84851 | 509.956757 | 3 | 13 | 19.294  | 33.22 |
| 5 | 56.01 | 58.01 | 69.8_PDK1_FlexII | 99.0_AVPLAGFGYGLPISR         | Label:13C(6)15N(4)(R)@15                                                                |                    | -0.00052314 | 1526.84802 | 764.4313 | 1526.84851 | 764.431519 | 2 | 15 | 19.7375 | 33.22 |
| 5 | 56.01 | 58.01 | 69.8_PDK1_FlexII | 99.0_AYPTFLYK                | Label:13C(6)15N(2)(K)@8                                                                 | cleaved S-A@N-term | 0.00103055  | 1009.53748 | 505.7776 | 1009.53644 | 505.775482 | 2 | 10 | 17.578  | 33.22 |
| 5 | 56.01 | 58.01 | 69.8_PDK1_FlexII | 99.0_AYPTFLYK                | Label:13C(6)15N(2)(K)@8                                                                 | cleaved S-A@N-term | 0.00078641  | 1009.53729 | 505.7759 | 1009.53644 | 505.775482 | 2 | 10 | 17.6741 | 33.22 |
| 5 | 56.01 | 58.01 | 69.8_PDK1_FlexII | 99.0_AYPTFLYK                | Label:13C(6)15N(2)(K)@8                                                                 | cleaved S-A@N-term | 0.00103055  | 1009.53748 | 505.7776 | 1009.53644 | 505.775482 | 2 | 10 | 17.7577 | 33.22 |
| 5 | 56.01 | 58.01 | 69.8_PDK1_FlexII | 99.0_EISLLPDNLLR             | Label:13C(6)15N(4)(R)@11                                                                |                    | -0.00314463 | 1291.7345  | 646.8745 | 1291.73755 | 646.876038 | 2 | 11 | 19.4257 | 33.22 |
| 5 | 56.01 | 58.01 | 69.8_PDK1_FlexII | 99.0_EISLLPDNLLR             | Label:13C(6)15N(4)(R)@11                                                                |                    | -0.00338877 | 1291.73413 | 646.8743 | 1291.73755 | 646.876038 | 2 | 11 | 19.4383 | 33.22 |
| 5 | 56.01 | 58.01 | 69.8_PDK1_FlexII | 99.0_ESFGVDPVTSQNVQYFLDR     | Label:13C(6)15N(4)(R)@19                                                                |                    | -0.00894114 | 2210.04346 | 1106.029 | 2210.052   | 1106.0332  | 2 | 24 | 19.1339 | 33.22 |
| 5 | 56.01 | 58.01 | 69.8_PDK1_FlexII | 99.0_ESFGVDPVTSQNVQYFLDR     | Label:13C(6)15N(4)(R)@19                                                                |                    | -0.00894114 | 2210.04346 | 1106.029 | 2210.052   | 1106.0332  | 2 | 22 | 19.1365 | 33.22 |
| 5 | 56.01 | 58.01 | 69.8_PDK1_FlexII | 99.0_ESFGVDPVTSQNVQYFLDR     | Label:13C(6)15N(4)(R)@19                                                                |                    | -0.00894114 | 2210.04346 | 1106.029 | 2210.052   | 1106.0332  | 2 | 22 | 19.1416 | 33.22 |
| 5 | 56.01 | 58.01 | 69.8_PDK1_FlexII | 99.0_ESFGVDPVTSQNVQYFLDR     | Label:13C(6)15N(4)(R)@19                                                                |                    | -0.00768241 | 2210.04443 | 737.6887 | 2210.052   | 737.691223 | 3 | 22 | 19.1748 | 33.22 |
| 5 | 56.01 | 58.01 | 69.8_PDK1_FlexII | 99.0_ESFGVDPVTSQNVQYFLDR     | Label:13C(6)15N(4)(R)@19                                                                |                    | -0.00054125 | 2210.05151 | 737.6911 | 2210.052   | 737.691223 | 3 | 24 | 19.1976 | 33.22 |
| 5 | 56.01 | 58.01 | 69.8_PDK1_FlexII | 99.0_ESFGVDPVTSQNVQYFLDR     | Label:13C(6)15N(4)(R)@19                                                                |                    | -0.00503486 | 2210.04736 | 1106.031 | 2210.052   | 1106.0332  | 2 | 18 | 19.2434 | 33.22 |
| 5 | 56.01 | 58.01 | 69.8_PDK1_FlexII | 99.0_FSPSPLSMK               | Label:13C(6)15N(2)(K)@9                                                                 |                    | -0.00039077 | 1000.51386 | 501.2642 | 1000.51428 | 501.264435 | 2 | 10 | 16.9392 | 33.22 |
| 5 | 56.01 | 58.01 | 69.8_PDK1_FlexII | 99.0_FSPSPLSMK               | Label:13C(6)15N(2)(K)@9                                                                 |                    | -0.00039077 | 1000.51386 | 501.2642 | 1000.51428 | 501.264435 | 2 | 10 | 16.9417 | 33.22 |
| 5 | 56.01 | 58.01 | 69.8_PDK1_FlexII | 99.0_GAALAGPGGLR             | Label:13C(6)15N(4)(R)@12                                                                |                    | 0.00185758  | 1045.59265 | 523.8036 | 1045.59082 | 523.802673 | 2 | 13 | 15.9805 | 33.22 |
| 5 | 56.01 | 58.01 | 69.8_PDK1_FlexII | 99.0_GAALAGPGGLR             | Label:13C(6)15N(4)(R)@12                                                                |                    | 0.00063687  | 1045.59143 | 523.803  | 1045.59082 | 523.802673 | 2 | 13 | 16.0031 | 33.22 |
| 5 | 56.01 | 58.01 | 69.8_PDK1_FlexII | 99.0_GAALAGPGGLR             | Label:13C(6)15N(4)(R)@12                                                                |                    | -0.00058384 | 1045.59033 | 523.8024 | 1045.59082 | 523.802673 | 2 | 13 | 16.0484 | 33.22 |
| 5 | 56.01 | 58.01 | 69.8_PDK1_FlexII | 99.0_GAALAGPGGLR             | Label:13C(6)15N(4)(R)@12                                                                |                    | -0.0362286  | 1045.55444 | 523.7945 | 1045.59082 | 523.802673 | 2 | 9  | 16.2437 | 33.22 |
| 5 | 56.01 | 58.01 | 69.8_PDK1_FlexII | 99.0_GVYPPIQVHVTLGNEDLTVK    | Deamidated(Q)@7; Label:13C(6)15N(2)(K)@20                                               |                    | 0.0245626   | 2187.19116 | 730.071  | 2187.16675 | 730.062866 | 3 | 13 | 18.251  | 33.22 |
| 5 | 56.01 | 58.01 | 69.8_PDK1_FlexII | 99.0_HIGSINPNCNVLEVIK        | Propionamide(C)@9; Label:13C(6)15N(2)(K)@16                                             |                    | 0.00302     | 1827.97864 | 610.3335 | 1827.97571 | 610.33252  | 3 | 19 | 17.8232 | 33.22 |
| 5 | 56.01 | 58.01 | 69.8_PDK1_FlexII | 99.0_HIGSINPNCNVLEVIK        | Propionamide(C)@9; Label:13C(6)15N(2)(K)@16                                             |                    | 0.00302     | 1827.97864 | 610.3335 | 1827.97571 | 610.33252  | 3 | 19 | 17.8258 | 33.22 |
| 5 | 56.01 | 58.01 | 69.8_PDK1_FlexII | 99.0_HIGSINPNCNVLEVIK        | Propionamide(C)@9; Label:13C(6)15N(2)(K)@16                                             |                    | 0.00878037  | 1827.9845  | 914.9995 | 1827.97571 | 914.995117 | 2 | 28 | 17.8334 | 33.22 |
| 5 | 56.01 | 58.01 | 69.8_PDK1_FlexII | 99.0_HIGSINPNCNVLEVIK        | Propionamide(C)@9; Label:13C(6)15N(2)(K)@16                                             |                    | 0.00878037  | 1827.9845  | 914.9995 | 1827.97571 | 914.995117 | 2 | 28 | 17.8434 | 33.22 |
| 5 | 56.01 | 58.01 | 69.8_PDK1_FlexII | 99.0_HNDVIPTMAQGVIEWK        | Label:13C(6)15N(2)(K)@16                                                                |                    | 0.00332328  | 1821.9209  | 911.9677 | 1821.91748 | 911.966003 | 2 | 27 | 17.7121 | 33.22 |
| 5 | 56.01 | 58.01 | 69.8_PDK1_FlexII | 99.0_HNDVIPTMAQGVIEWK        | Label:13C(6)15N(2)(K)@16                                                                |                    | 0.00332328  | 1821.9209  | 911.9677 | 1821.91748 | 911.966003 | 2 | 27 | 17.7221 | 33.22 |
| 5 | 56.01 | 58.01 | 69.8_PDK1_FlexII | 99.0_HNDVIPTMAQGVIEWK        | Label:13C(6)15N(2)(K)@16                                                                |                    | 0.00238472  | 1821.91992 | 608.3139 | 1821.91748 | 608.31311  | 3 | 22 | 17.7246 | 33.22 |
| 5 | 56.01 | 58.01 | 69.8_PDK1_FlexII | 99.0_HNDVIPTMAQGVIEWK        | Label:13C(6)15N(2)(K)@16                                                                |                    | 0.00256783  | 1821.92029 | 608.314  | 1821.91748 | 608.31311  | 3 | 22 | 17.7424 | 33.22 |
| 5 | 56.01 | 58.01 | 69.8_PDK1_FlexII | 99.0_HNDVIPTMAQGVIEWK        | Label:13C(6)15N(2)(K)@16                                                                |                    | 0.00674127  | 1821.92432 | 911.9694 | 1821.91748 | 911.966003 | 2 | 26 | 17.7726 | 33.22 |
| 5 | 56.01 | 58.01 | 69.8_PDK1_FlexII | 99.0_HYNTNHEADDWCVPSR        | Propionamide(C)@12; Label:13C(6)15N(4)(R)@16                                            |                    | 0.00512108  | 2023.85193 | 675.6246 | 2023.84705 | 675.622986 | 3 | 19 | 15.5258 | 33.22 |
| 5 | 56.01 | 58.01 | 69.8_PDK1_FlexII | 99.0_HYNTNHEADDWCVPSR        | Propionamide(C)@12; Label:13C(6)15N(4)(R)@16                                            |                    | 0.00512108  | 2023.85193 | 675.6246 | 2023.84705 | 675.622986 | 3 | 19 | 15.5309 | 33.22 |
| 5 | 56.01 | 58.01 | 69.8_PDK1_FlexII | 99.0_HYNTNHEADDWCVPSR        | Propionamide(C)@12; Label:13C(6)15N(4)(R)@16                                            |                    | 0.0008866   | 2023.84815 | 506.9693 | 2023.84705 | 506.969025 | 4 | 14 | 15.5459 | 33.22 |
| 5 | 56.01 | 58.01 | 69.8_PDK1_FlexII | 99.0_HYNTNHEADDWCVPSR        | Propionamide(C)@12; Label:13C(6)15N(4)(R)@16                                            |                    | 0.0008866   | 2023.84815 | 506.9693 | 2023.84705 | 506.969025 | 4 | 14 | 15.5484 | 33.22 |
| 5 | 56.01 | 58.01 | 69.8_PDK1_FlexII | 99.0_HYNTNHEADDWCVPSR        | Propionamide(C)@12; Label:13C(6)15N(4)(R)@16                                            |                    |             |            |          |            |            |   |    |         |       |

|   |       |       |      |              |      |                                      |                                                                                             |                               |             |             |          |            |            |   |    |         |       |
|---|-------|-------|------|--------------|------|--------------------------------------|---------------------------------------------------------------------------------------------|-------------------------------|-------------|-------------|----------|------------|------------|---|----|---------|-------|
| 5 | 56.01 | 58.01 | 69.8 | PDK1_FlexII  | 99.0 | LCDLYYINSPELEELNAK                   | Propionamide(C) @2; Label: 13C(6)15N(2)(K) @20                                              |                               | -0.00573617 | 2447.19629  | 816.7394 | 2447.20215 | 816.741333 | 3 | 20 | 19.573  | 33.22 |
| 5 | 56.01 | 58.01 | 69.8 | PDK1_FlexII  | 99.0 | LCDLYYINSPELEELNAK                   | Propionamide(C) @2; Label: 13C(6)15N(2)(K) @20                                              |                               | 0.00085568  | 2447.20288  | 816.7416 | 2447.20215 | 816.741333 | 3 | 20 | 19.608  | 33.22 |
| 5 | 56.01 | 58.01 | 69.8 | PDK1_FlexII  | 99.0 | LFNYMYSTAPRPR                        | Label: 13C(6)15N(4)(R) @11; Label: 13C(6)15N(4)(R) @13                                      |                               | 0.0132103   | 1634.82784  | 545.9498 | 1634.81421 | 545.945374 | 3 | 10 | 17.1211 | 33.22 |
| 5 | 56.01 | 58.01 | 69.8 | PDK1_FlexII  | 99.0 | LFNYMYSTAPRPR                        | Label: 13C(6)15N(4)(R) @11; Label: 13C(6)15N(4)(R) @13                                      |                               | 0.0005759   | 1634.81506  | 545.9456 | 1634.81421 | 545.945374 | 3 | 10 | 17.1565 | 33.22 |
| 5 | 56.01 | 58.01 | 69.8 | PDK1_FlexII  | 99.0 | LFNYMYSTAPRPR                        | Label: 13C(6)15N(4)(R) @11; Label: 13C(6)15N(4)(R) @13                                      |                               | 2.66E-05    | 1634.81433  | 545.9454 | 1634.81421 | 545.945374 | 3 | 9  | 17.1996 | 33.22 |
| 5 | 56.01 | 58.01 | 69.8 | PDK1_FlexII  | 99.0 | LYAQYFGQDLK                          | Label: 13C(6)15N(2)(K) @11                                                                  |                               | 0.00195601  | 1352.68762  | 677.3511 | 1352.68555 | 677.350098 | 2 | 14 | 17.7573 | 33.22 |
| 5 | 56.01 | 58.01 | 69.8 | PDK1_FlexII  | 99.0 | LYAQYFGQDLK                          | Label: 13C(6)15N(2)(K) @11                                                                  |                               | 0.00195601  | 1352.68762  | 677.3511 | 1352.68555 | 677.350098 | 2 | 14 | 17.7624 | 33.22 |
| 5 | 56.01 | 58.01 | 69.8 | PDK1_FlexII  | 99.0 | LYSLEGYGTDAVIYK                      | Label: 13C(6)15N(2)(K) @16                                                                  |                               | 0.00671928  | 1811.95044  | 906.9825 | 1811.94373 | 906.979126 | 2 | 22 | 18.9514 | 33.22 |
| 5 | 56.01 | 58.01 | 69.8 | PDK1_FlexII  | 99.0 | LYSLEGYGTDAVIYK                      | Label: 13C(6)15N(2)(K) @16                                                                  |                               | 0.00671928  | 1811.95044  | 906.9825 | 1811.94373 | 906.979126 | 2 | 22 | 18.954  | 33.22 |
| 5 | 56.01 | 58.01 | 69.8 | PDK1_FlexII  | 99.0 | LYSLEGYGTDAVIYK                      | Label: 13C(6)15N(2)(K) @16                                                                  |                               | 0.00671928  | 1811.95044  | 906.9825 | 1811.94373 | 906.979126 | 2 | 17 | 18.9566 | 33.22 |
| 5 | 56.01 | 58.01 | 69.8 | PDK1_FlexII  | 99.0 | MLLNQHSLLFGGK                        | Label: 13C(6)15N(2)(K) @13                                                                  |                               | -0.00116337 | 1464.79932  | 489.2737 | 1464.80029 | 489.274017 | 3 | 13 | 18.0309 | 33.22 |
| 5 | 56.01 | 58.01 | 69.8 | PDK1_FlexII  | 99.0 | MLLNQHSLLFGGK                        | Label: 13C(6)15N(2)(K) @13                                                                  |                               | -0.00116337 | 1464.79932  | 489.2737 | 1464.80029 | 489.274017 | 3 | 12 | 18.0334 | 33.22 |
| 5 | 56.01 | 58.01 | 69.8 | PDK1_FlexII  | 99.0 | MLLNQHSLLFGGK                        | Label: 13C(6)15N(2)(K) @13                                                                  |                               | -0.00116337 | 1464.79932  | 489.2737 | 1464.80029 | 489.274017 | 3 | 11 | 18.0384 | 33.22 |
| 5 | 56.01 | 58.01 | 69.8 | PDK1_FlexII  | 99.0 | MLLNQHSLLFGGK                        | Label: 13C(6)15N(2)(K) @13                                                                  |                               | 0.00087383  | 1464.80103  | 733.4078 | 1464.80029 | 733.40741  | 2 | 22 | 18.041  | 33.22 |
| 5 | 56.01 | 58.01 | 69.8 | PDK1_FlexII  | 99.0 | MLLNQHSLLFGGK                        | Label: 13C(6)15N(2)(K) @13                                                                  |                               | 0.00087383  | 1464.80103  | 733.4078 | 1464.80029 | 733.40741  | 2 | 21 | 18.0586 | 33.22 |
| 5 | 56.01 | 58.01 | 69.8 | PDK1_FlexII  | 99.0 | MLLNQHSLLFGGK                        | Label: 13C(6)15N(2)(K) @13                                                                  |                               | 0.0018504   | 1464.80212  | 733.4083 | 1464.80029 | 733.40741  | 2 | 17 | 18.0713 | 33.22 |
| 5 | 56.01 | 58.01 | 69.8 | PDK1_FlexII  | 99.0 | NRHNDVIPTMAQGVIEYK                   | Label: 13C(6)15N(4)(R) @2; Label: 13C(6)15N(2)(K) @18                                       | missed R-H @2                 | 0.0108947   | 2102.08057  | 701.7008 | 2102.06962 | 701.697205 | 3 | 20 | 17.2243 | 33.22 |
| 5 | 56.01 | 58.01 | 69.8 | PDK1_FlexII  | 99.0 | NRHNDVIPTMAQGVIEYK                   | Label: 13C(6)15N(4)(R) @2; Deamidated(N) @4; Label: 13C(6)15N(2)(K) @18                     | missed R-H @2                 | 0.0169373   | 2103.07056  | 702.0308 | 2103.05371 | 702.025208 | 3 | 13 | 17.2268 | 33.22 |
| 5 | 56.01 | 58.01 | 69.8 | PDK1_FlexII  | 99.0 | NRHNDVIPTMAQGVIEYK                   | Label: 13C(6)15N(4)(R) @2; Label: 13C(6)15N(2)(K) @18                                       | missed R-H @2                 | 0.00354742  | 2102.07324  | 526.5256 | 2102.06962 | 526.524719 | 4 | 16 | 17.2293 | 33.22 |
| 5 | 56.01 | 58.01 | 69.8 | PDK1_FlexII  | 99.0 | NRHNDVIPTMAQGVIEYK                   | Label: 13C(6)15N(4)(R) @2; Label: 13C(6)15N(2)(K) @18                                       | missed R-H @2                 | 0.00354742  | 2102.07324  | 526.5256 | 2102.06962 | 526.524719 | 4 | 16 | 17.2368 | 33.22 |
| 5 | 56.01 | 58.01 | 69.8 | PDK1_FlexII  | 99.0 | QFLDFGSVNACEK                        | Propionamide(C) @11; Label: 13C(6)15N(2)(K) @13                                             |                               | 0.0110334   | 1535.72803  | 768.8713 | 1535.71692 | 768.865794 | 2 | 15 | 18.2485 | 33.22 |
| 5 | 56.01 | 58.01 | 69.8 | PDK1_FlexII  | 99.0 | QFLDFGSVNACEK                        | Deamidated(Q) @1; Propionamide(C) @11; Label: 13C(6)15N(2)(K) @13                           |                               | 0.0270248   | 1536.72803  | 769.3713 | 1536.70105 | 769.357788 | 2 | 12 | 18.2687 | 33.22 |
| 5 | 56.01 | 58.01 | 69.8 | PDK1_FlexII  | 99.0 | QFLDFGSVNACEK                        | Propionamide(C) @11; Label: 13C(6)15N(2)(K) @13                                             |                               | 0.00505194  | 1535.72205  | 768.8683 | 1535.71692 | 768.865784 | 2 | 16 | 18.2788 | 33.22 |
| 5 | 56.01 | 58.01 | 69.8 | PDK1_FlexII  | 99.0 | QFLDFGSVNACEK                        | Gln->pyro-Glu @N-term; Propionamide(C) @11; Label: 13C(6)15N(2)(K) @13                      |                               | -0.0025747  | 1518.688787 | 760.3512 | 1518.69043 | 760.352478 | 2 | 18 | 19.8138 | 33.22 |
| 5 | 56.01 | 58.01 | 69.8 | PDK1_FlexII  | 99.0 | QFLDFGSVNACEK                        | Gln->pyro-Glu @N-term; Propionamide(C) @11; Label: 13C(6)15N(2)(K) @13                      |                               | -0.00318506 | 1518.68726  | 760.3509 | 1518.69043 | 760.352478 | 2 | 16 | 19.8594 | 33.22 |
| 5 | 56.01 | 58.01 | 69.8 | PDK1_FlexII  | 99.0 | RCLDLYYINSPELEELNAK                  | Label: 13C(6)15N(4)(R) @1; Propionamide(C) @3; Deamidated(N) @9; Label: 13C(6)15N(2)(K) @21 | missed R-L @1                 | 0.0386851   | 2614.33423  | 872.452  | 2614.29565 | 872.439148 | 3 | 16 | 18.9869 | 33.22 |
| 5 | 56.01 | 58.01 | 69.8 | PDK1_FlexII  | 99.0 | RCLDLYYINSPELEELNAK                  | Label: 13C(6)15N(4)(R) @1; Propionamide(C) @3; Label: 13C(6)15N(2)(K) @21                   | missed R-L @1                 | 0.00261305  | 2613.31421  | 872.112  | 2613.31152 | 872.111145 | 3 | 23 | 19.0071 | 33.22 |
| 5 | 56.01 | 58.01 | 69.8 | PDK1_FlexII  | 99.0 | SAYPTFLYK                            | Label: 13C(6)15N(2)(K) @9                                                                   |                               | 0.00051362  | 1096.56885  | 549.2917 | 1096.56848 | 549.291504 | 2 | 10 | 17.8485 | 33.22 |
| 5 | 56.01 | 58.01 | 69.8 | PDK1_FlexII  | 99.0 | SAYPTFLYK                            | Label: 13C(6)15N(2)(K) @9                                                                   |                               | 0.00051362  | 1096.56885  | 549.2917 | 1096.56848 | 549.291504 | 2 | 10 | 17.8611 | 33.22 |
| 5 | 56.01 | 58.01 | 69.8 | PDK1_FlexII  | 99.0 | SFSSDSGSSPASER                       | Label: 13C(6)15N(4)(R) @14                                                                  |                               | 0.00247595  | 1409.59583  | 705.8052 | 1409.59338 | 705.804016 | 2 | 16 | 14.0985 | 33.22 |
| 5 | 56.01 | 58.01 | 69.8 | PDK1_FlexII  | 99.0 | SFSSDSGSSPASER                       | Label: 13C(6)15N(4)(R) @14                                                                  |                               | 0.0027201   | 1409.59631  | 705.8054 | 1409.59338 | 705.804016 | 2 | 16 | 14.1364 | 33.22 |
| 5 | 56.01 | 58.01 | 69.8 | PDK1_FlexII  | 99.0 | SFSSDSGSSPASER                       | Label: 13C(6)15N(4)(R) @14                                                                  |                               | 0.0027201   | 1409.59631  | 705.8054 | 1409.59338 | 705.804016 | 2 | 15 | 14.2475 | 33.22 |
| 5 | 56.01 | 58.01 | 69.8 | PDK1_FlexII  | 99.0 | SPGQPIQVVVPSHLHYHMFELFK              | Deamidated(Q) @7; Label: 13C(6)15N(2)(K) @24                                                |                               | -0.00064096 | 2823.4541   | 706.8708 | 2823.45483 | 706.871033 | 4 | 13 | 20.5301 | 33.22 |
| 5 | 56.01 | 58.01 | 69.8 | PDK1_FlexII  | 99.0 | TPSVQLVQSWYIQLQELLDFKDK              | Deamidated(Q) @13; Label: 13C(6)15N(2)(K) @22; Label: 13C(6)15N(2)(K) @24                   | missed K-D @22                | 0.0376738   | 2881.5459   | 961.5226 | 2881.50855 | 961.510071 | 3 | 21 | 20.5175 | 33.22 |
| 5 | 56.01 | 58.01 | 69.8 | PDK1_FlexII  | 99.0 | TSFMFLR                              | Label: 13C(6)15N(4)(R) @7                                                                   |                               | -0.0017572  | 910.45929   | 456.2369 | 910.460999 | 456.237793 | 2 | 8  | 17.7386 | 33.22 |
| 5 | 56.01 | 58.01 | 69.8 | PDK1_FlexII  | 99.0 | TSFMFLR                              | Label: 13C(6)15N(4)(R) @7                                                                   |                               | -0.0017572  | 910.45929   | 456.2369 | 910.460999 | 456.237793 | 2 | 8  | 18.7411 | 33.22 |
| 5 | 56.01 | 58.01 | 69.8 | PDK1_FlexII  | 99.0 | YPTFLYK                              | Label: 13C(6)15N(2)(K) @7                                                                   | cleaved A-Y @N-term           | -0.00061447 | 938.498657  | 470.2566 | 938.499329 | 470.256928 | 2 | 9  | 17.7815 | 33.22 |
| 6 | 55.31 | 57.32 | 3.8  | CDC27_FlexII | 99.0 | AAAEGLMSLLR                          | Label: 13C(6)15N(4)(R) @11                                                                  |                               | -0.00531472 | 1140.61462  | 571.3146 | 1140.62    | 571.317322 | 2 | 14 | 19.3936 | 0.76  |
| 6 | 55.31 | 57.32 | 3.8  | CDC27_FlexII | 99.0 | AIQVDPNYYAYTLLGHEFVLTEELDK           | Label: 13C(6)15N(2)(K) @27                                                                  |                               | -0.0198503  | 3119.53735  | 1040.853 | 3119.55835 | 1040.85999 | 3 | 21 | 20.3282 | 0.76  |
| 6 | 55.31 | 57.32 | 3.8  | CDC27_FlexII | 99.0 | AVIDPK                               | Label: 13C(6)15N(2)(K) @7                                                                   |                               | -0.00310629 | 762.470093  | 382.2423 | 762.473084 | 382.243835 | 2 | 9  | 15.8001 | 0.76  |
| 6 | 55.31 | 57.32 | 3.8  | CDC27_FlexII | 99.0 | ALDINPOSSVLLCHIGVVQHALK              | Propionamide(C) @13; Label: 13C(6)15N(2)(K) @23                                             |                               | 0.0188518   | 2533.41187  | 634.3602 | 2533.39307 | 634.35553  | 4 | 16 | 18.621  | 0.76  |
| 6 | 55.31 | 57.32 | 3.8  | CDC27_FlexII | 99.0 | ASVLFANEK                            | Label: 13C(6)15N(2)(K) @9                                                                   |                               | -0.00121458 | 985.53125   | 493.7729 | 985.53241  | 493.773468 | 2 | 11 | 16.5812 | 0.76  |
| 6 | 55.31 | 57.32 | 3.8  | CDC27_FlexII | 99.0 | AYFELSEYMQAER                        | Label: 13C(6)15N(4)(R) @13                                                                  |                               | 0.00492548  | 1645.73731  | 823.8759 | 1645.73218 | 823.873552 | 2 | 17 | 18.6944 | 0.76  |
| 6 | 55.31 | 57.32 | 3.8  | CDC27_FlexII | 99.0 | CCVDLSK                              | Propionamide(C) @1; Propionamide(C) @2; Label: 13C(6)15N(2)(K) @7                           |                               | -0.0153252  | 916.422302  | 459.2184 | 916.423767 | 459.219177 | 2 | 10 | 14.7841 | 0.76  |
| 6 | 55.31 | 57.32 | 3.8  | CDC27_FlexII | 99.0 | DAVFLAER                             | Label: 13C(6)15N(4)(R) @8                                                                   |                               | -0.00128354 | 929.483276  | 465.7489 | 929.484619 | 465.749573 | 2 | 11 | 17.0325 | 0.76  |
| 6 | 55.31 | 57.32 | 3.8  | CDC27_FlexII | 99.0 | DVALSVLSK                            | Label: 13C(6)15N(2)(K) @9                                                                   |                               | -0.00062178 | 938.552246  | 470.2834 | 938.552795 | 470.283661 | 2 | 10 | 17.4312 | 0.76  |
| 6 | 55.31 | 57.32 | 3.8  | CDC27_FlexII | 99.0 | ESLVYFLIGK                           | Label: 13C(6)15N(2)(K) @10                                                                  |                               | -0.00285933 | 1175.66528  | 588.8399 | 1175.66821 | 588.84137  | 2 | 10 | 20.1428 | 0.76  |
| 6 | 55.31 | 57.32 | 3.8  | CDC27_FlexII | 99.0 | EVTPILAQTQSSGPOTSTTPQVLSPTTISPPNALPR | Label: 13C(6)15N(4)(R) @36                                                                  |                               | 0.0162742   | 3723.97144  | 1242.331 | 3723.95581 | 1242.32593 | 3 | 24 | 18.3879 | 0.76  |
| 6 | 55.31 | 57.32 | 3.8  | CDC27_FlexII | 99.0 | FSLAEHMFQK                           | Label: 13C(6)15N(2)(K) @10                                                                  |                               | -0.00454486 | 1244.60584  | 623.3102 | 1244.61035 | 623.312439 | 2 | 11 | 17.5524 | 0.76  |
| 6 | 55.31 | 57.32 | 3.8  | CDC27_FlexII | 99.0 | FTSLQNFNSCLPNSCTTQVPNHLSHR           | Propionamide(C) @10; Propionamide(C) @15; Label: 13C(6)15N(4)(R) @27                        |                               | 0.00800904  | 3183.49341  | 796.8806 | 3183.48535 | 796.878601 | 4 | 23 | 17.1488 | 0.76  |
| 6 | 55.31 | 57.32 | 3.8  | CDC27_FlexII | 99.0 | GGITQPINDSLEITK                      | Label: 13C(6)15N(2)(K) @16                                                                  |                               | 0.00544297  | 1706.89844  | 854.4565 | 1706.89307 | 854.453796 | 2 | 18 | 17.3506 | 0.76  |
| 6 | 55.31 | 57.32 | 3.8  | CDC27_FlexII | 99.0 | HYNAWYGLGMIYYK                       | Label: 13C(6)15N(2)(K) @14                                                                  |                               | -0.00247291 | 1785.84045  | 893.9275 | 1785.84249 | 893.928711 | 2 | 24 | 18.9628 | 0.76  |
| 6 | 55.31 | 57.32 | 3.8  | CDC27_FlexII | 99.0 | ISTITPOIAQFNLOK                      | Label: 13C(6)15N(2)(K) @15                                                                  |                               | 0.00295703  | 1708.9574   | 570.6597 | 1708.96033 | 570.660706 | 3 | 10 | 18.2901 | 0.76  |
| 6 | 55.31 | 57.32 | 3.8  | CDC27_FlexII | 99.0 | LAEGEOILSGGVFNK                      | Label: 13C(6)15N(2)(K) @15                                                                  |                               | 0.00420808  | 1568.83325  | 785.4239 | 1568.82898 | 785.421753 | 2 | 21 | 18.0432 | 0.76  |
| 6 | 55.31 | 57.32 | 3.8  | CDC27_FlexII | 99.0 | LDSSISEGK                            | Label: 13C(6)15N(2)(K) @10                                                                  |                               | 0.00025277  | 1055.55933  | 528.7869 | 1055.55986 | 528.786804 | 2 | 13 | 16.0479 | 0.76  |
| 6 | 55.31 | 57.32 | 3.8  | CDC27_FlexII | 99.0 | LFTSDSSTTK                           | Label: 13C(6)15N(2)(K) @10                                                                  |                               | 0.00639352  | 1093.54468  | 547.7796 | 1093.53821 | 547.776428 | 2 | 11 | 14.9731 | 0.76  |
| 6 | 55.31 | 57.32 | 3.8  | CDC27_FlexII | 99.0 | MKFPPEIPNRK                          | Label: 13C(6)15N(2)(K) @2; Label: 13C(6)15N(4)(R) @10; Label: 13C(6)15N(2)(K) @11           | missed K-F @2; missed R-K @10 | -0.00225337 | 1381.77283  | 641.5982 | 1381.77502 | 641.598969 | 3 | 11 | 16.7429 | 0.76  |
| 6 | 55.   |       |      |              |      |                                      |                                                                                             |                               |             |             |          |            |            |   |    |         |       |

|   |       |       |      |                |      |                                         |                                                                                                   |             |            |          |            |            |   |    |         |       |
|---|-------|-------|------|----------------|------|-----------------------------------------|---------------------------------------------------------------------------------------------------|-------------|------------|----------|------------|------------|---|----|---------|-------|
| 6 | 55.31 | 57.32 | 3.8  | CDC27_FlexIII  | 99.0 | AIQVDPNYAYAYTLGHEFVLTEELDK              | Label: 13C(6)15N(2)(K)@27                                                                         | -0.00666661 | 3119.55225 | 1040.858 | 3119.55835 | 1040.85999 | 3 | 19 | 20.3105 | 0.76  |
| 6 | 55.31 | 57.32 | 3.8  | CDC27_FlexIII  | 99.0 | AVIDPK                                  | Label: 13C(6)15N(2)(K)@7                                                                          | -0.00286215 | 762.470276 | 382.2424 | 762.473084 | 382.243835 | 2 | 9  | 15.8368 | 0.76  |
| 6 | 55.31 | 57.32 | 3.8  | CDC27_FlexIII  | 99.0 | ALDINPOSSVLLCHIGVVQHALK                 | Deamidated(Q)@7; Propionamide(C)@13; Label: 13C(6)15N(2)(K)@23                                    | 0.0348441   | 2534.41187 | 634.6102 | 2534.37695 | 634.601563 | 4 | 16 | 18.5071 | 0.76  |
| 6 | 55.31 | 57.32 | 3.8  | CDC27_FlexIII  | 99.0 | ALDINPOSSVLLCHIGVVQHALK                 | Deamidated(Q)@7; Propionamide(C)@13; Label: 13C(6)15N(2)(K)@23                                    | 0.0368816   | 2534.41182 | 845.8119 | 2534.37695 | 845.799622 | 3 | 12 | 18.5906 | 0.76  |
| 6 | 55.31 | 57.32 | 3.8  | CDC27_FlexIII  | 99.0 | ASVLFANEK                               | Label: 13C(6)15N(2)(K)@9                                                                          | -0.00084837 | 985.531494 | 493.773  | 985.53241  | 493.773468 | 2 | 11 | 16.6256 | 0.76  |
| 6 | 55.31 | 57.32 | 3.8  | CDC27_FlexIII  | 99.0 | AYFELSEYMQAER                           | Label: 13C(6)15N(4)(R)@13                                                                         | 0.00700069  | 1645.73926 | 823.8769 | 1645.73218 | 823.873352 | 2 | 16 | 18.7248 | 0.76  |
| 6 | 55.31 | 57.32 | 3.8  | CDC27_FlexIII  | 99.0 | AYFELSEYMQAER                           | Label: 13C(6)15N(4)(R)@13                                                                         | 0.0073669   | 1645.73962 | 823.8771 | 1645.73218 | 823.873352 | 2 | 14 | 18.7628 | 0.76  |
| 6 | 55.31 | 57.32 | 3.8  | CDC27_FlexIII  | 99.0 | DAVFLAER                                | Label: 13C(6)15N(4)(R)@8                                                                          | -0.00128354 | 929.483276 | 465.7489 | 929.484619 | 465.749573 | 2 | 10 | 17.035  | 0.76  |
| 6 | 55.31 | 57.32 | 3.8  | CDC27_FlexIII  | 99.0 | DVALSVLSK                               | Label: 13C(6)15N(2)(K)@9                                                                          | -0.00062178 | 938.552246 | 470.2834 | 938.552795 | 470.283661 | 2 | 10 | 17.4262 | 0.76  |
| 6 | 55.31 | 57.32 | 3.8  | CDC27_FlexIII  | 99.0 | DVALSVLSK                               | Label: 13C(6)15N(2)(K)@9                                                                          | -0.00062178 | 938.552246 | 470.2834 | 938.552795 | 470.283661 | 2 | 10 | 17.5119 | 0.76  |
| 6 | 55.31 | 57.32 | 3.8  | CDC27_FlexIII  | 99.0 | EVTPILAQTQSSGPQTSTTPQVLSPTTISPPNALPR    | Deamidated(Q)@15; Label: 13C(6)15N(4)(R)@36                                                       | 0.0334872   | 3724.97339 | 1242.665 | 3724.93994 | 1242.65393 | 3 | 22 | 18.3473 | 0.76  |
| 6 | 55.31 | 57.32 | 3.8  | CDC27_FlexIII  | 99.0 | EVTPILAQTQSSGPQTSTTPQVLSPTTISPPNALPR    | Deamidated(Q)@21; Label: 13C(6)15N(4)(R)@36                                                       | 0.0413985   | 3724.96145 | 932.2526 | 3724.93994 | 932.242249 | 4 | 21 | 18.3904 | 0.76  |
| 6 | 55.31 | 57.32 | 3.8  | CDC27_FlexIII  | 99.0 | EVTPILAQTQSSGPQTSTTPQVLSPTTISPPNALPR    | Label: 13C(6)15N(4)(R)@36                                                                         | 0.0272606   | 3723.98315 | 1242.335 | 3723.95581 | 1242.32593 | 3 | 24 | 18.4564 | 0.76  |
| 6 | 55.31 | 57.32 | 3.8  | CDC27_FlexIII  | 99.0 | FSLAEMHFQK                              | Label: 13C(6)15N(2)(K)@10                                                                         | 0.0323207   | 1244.6427  | 623.3286 | 1244.61035 | 623.312439 | 2 | 11 | 17.6131 | 0.76  |
| 6 | 55.31 | 57.32 | 3.8  | CDC27_FlexIII  | 99.0 | FSLAEMHFQK                              | Label: 13C(6)15N(2)(K)@10                                                                         | 0.0323207   | 1244.6427  | 623.3286 | 1244.61035 | 623.312439 | 2 | 11 | 17.6357 | 0.76  |
| 6 | 55.31 | 57.32 | 3.8  | CDC27_FlexIII  | 99.0 | FTSLQNFNSCNLPNSCTTQVPNHLSLHR            | Propionamide(C)@10; Propionamide(C)@15; Label: 13C(6)15N(4)(R)@27                                 | 0.00800904  | 3183.49341 | 796.8806 | 3183.48535 | 796.878601 | 4 | 22 | 17.1362 | 0.76  |
| 6 | 55.31 | 57.32 | 3.8  | CDC27_FlexIII  | 99.0 | FTSLQNFNSCNLPNSCTTQVPNHLSLHR            | Propionamide(C)@10; Propionamide(C)@15; Label: 13C(6)15N(4)(R)@27                                 | 0.00922975  | 3183.49463 | 796.8809 | 3183.48535 | 796.878601 | 4 | 20 | 17.1634 | 0.76  |
| 6 | 55.31 | 57.32 | 3.8  | CDC27_FlexIII  | 99.0 | FTSLQNFNSCNLPNSCTTQVPNHLSLHR            | Propionamide(C)@10; Propionamide(C)@15; Label: 13C(6)15N(4)(R)@27                                 | 0.00922975  | 3183.49463 | 796.8809 | 3183.48535 | 796.878601 | 4 | 21 | 17.1685 | 0.76  |
| 6 | 55.31 | 57.32 | 3.8  | CDC27_FlexIII  | 99.0 | FTSLQNFNSCNLPNSCTTQVPNHLSLHR            | Propionamide(C)@10; Propionamide(C)@15; Label: 13C(6)15N(4)(R)@27                                 | 0.0104505   | 3183.49585 | 796.8812 | 3183.48535 | 796.878601 | 4 | 22 | 17.1988 | 0.76  |
| 6 | 55.31 | 57.32 | 3.8  | CDC27_FlexIII  | 99.0 | FTSLQNFNSCNLPNSCTTQVPNHLSLHR            | Deamidated(N)@9; Propionamide(C)@10; Propionamide(C)@15; Label: 13C(6)15N(4)(R)@27                | 0.0496596   | 3184.52026 | 1062.514 | 3184.46948 | 1062.49707 | 3 | 13 | 17.3228 | 0.76  |
| 6 | 55.31 | 57.32 | 3.8  | CDC27_FlexIII  | 99.0 | GGITQPNINDSLEITK                        | Label: 13C(6)15N(2)(K)@16                                                                         | 0.00544297  | 1706.89844 | 854.4565 | 1706.89307 | 854.453796 | 2 | 16 | 17.3354 | 0.76  |
| 6 | 55.31 | 57.32 | 3.8  | CDC27_FlexIII  | 99.0 | GGITQPNINDSLEITK                        | Label: 13C(6)15N(2)(K)@16                                                                         | 0.00544297  | 1706.89844 | 854.4565 | 1706.89307 | 854.453796 | 2 | 18 | 17.3379 | 0.76  |
| 6 | 55.31 | 57.32 | 3.8  | CDC27_FlexIII  | 99.0 | HYNAWYGLGMIYYK                          | Label: 13C(6)15N(2)(K)@14                                                                         | 0.00424101  | 1785.84705 | 893.9308 | 1785.84429 | 893.928711 | 2 | 25 | 18.9425 | 0.76  |
| 6 | 55.31 | 57.32 | 3.8  | CDC27_FlexIII  | 99.0 | ISTITPQIQAFNLQK                         | Label: 13C(6)15N(2)(K)@15                                                                         | 0.00909035  | 1708.96948 | 855.492  | 1708.96033 | 855.487427 | 2 | 13 | 18.2001 | 0.76  |
| 6 | 55.31 | 57.32 | 3.8  | CDC27_FlexIII  | 99.0 | LAEGEOILSGGVFNK                         | Label: 13C(6)15N(2)(K)@15                                                                         | 0.00420808  | 1568.83325 | 785.4239 | 1568.82898 | 785.421753 | 2 | 22 | 18.0382 | 0.76  |
| 6 | 55.31 | 57.32 | 3.8  | CDC27_FlexIII  | 99.0 | LAEGEOILSGGVFNK                         | Label: 13C(6)15N(2)(K)@15                                                                         | 0.00481844  | 1568.83386 | 785.4242 | 1568.82898 | 785.421753 | 2 | 21 | 18.0886 | 0.76  |
| 6 | 55.31 | 57.32 | 3.8  | CDC27_FlexIII  | 99.0 | LDSSISSEK                               | Label: 13C(6)15N(2)(K)@10                                                                         | 0.00025277  | 1055.55933 | 528.7869 | 1055.55896 | 528.786804 | 2 | 13 | 16.0456 | 0.76  |
| 6 | 55.31 | 57.32 | 3.8  | CDC27_FlexIII  | 99.0 | MKFPPEIPNRK                             | Label: 13C(6)15N(2)(K)@2; Label: 13C(6)15N(4)(R)@10; Label: 13C(6)15N(2)(K)@11                    | -0.00014764 | 1381.7749  | 461.5989 | 1381.77502 | 461.598969 | 3 | 12 | 15.5674 | 0.76  |
| 6 | 55.31 | 57.32 | 3.8  | CDC27_FlexIII  | 99.0 | QPETVLTPQDQTIELNR                       | Deamidated(Q)@1; Label: 13C(6)15N(4)(R)@18                                                        | 0.0369151   | 2094.07324 | 1048.044 | 2094.07324 | 1048.02502 | 2 | 17 | 17.6508 | 0.76  |
| 6 | 55.31 | 57.32 | 3.8  | CDC27_FlexIII  | 99.0 | QPETVLTPQDQTIELNR                       | Label: 13C(6)15N(4)(R)@18                                                                         | 0.00903014  | 2093.05347 | 1047.534 | 2093.05151 | 1047.53308 | 2 | 22 | 17.6559 | 0.76  |
| 6 | 55.31 | 57.32 | 3.8  | CDC27_FlexIII  | 99.0 | QPETVLTPQDQTIELNR                       | Gln->pyro-Glu@N-term; Label: 13C(6)15N(4)(R)@18                                                   | 0.0109614   | 2076.0354  | 1039.025 | 2076.02515 | 1039.01978 | 2 | 20 | 18.6312 | 0.76  |
| 6 | 55.31 | 57.32 | 3.8  | CDC27_FlexIII  | 99.0 | QPETVLTPQDQTIELNR                       | Gln->pyro-Glu@N-term; Label: 13C(6)15N(4)(R)@18                                                   | 0.0109614   | 2076.0354  | 1039.025 | 2076.02515 | 1039.01978 | 2 | 20 | 18.6616 | 0.76  |
| 6 | 55.31 | 57.32 | 3.8  | CDC27_FlexIII  | 99.0 | SALQLEELK                               | Label: 13C(6)15N(2)(K)@10                                                                         | -0.00027354 | 1166.62732 | 584.3209 | 1166.62744 | 584.320984 | 2 | 11 | 18.436  | 0.76  |
| 6 | 55.31 | 57.32 | 3.8  | CDC27_FlexIII  | 99.0 | SHDDIVTEFGDSACFTLSLLGHVYCK              | Propionamide(C)@14; Propionamide(C)@25; Label: 13C(6)15N(2)(K)@26                                 | -0.00601197 | 3006.39209 | 1003.138 | 3006.39819 | 1003.14002 | 3 | 29 | 20.3841 | 0.76  |
| 6 | 55.31 | 57.32 | 3.8  | CDC27_FlexIII  | 99.0 | SHDDIVTEFGDSACFTLSLLGHVYCK              | Propionamide(C)@14; Propionamide(C)@25; Label: 13C(6)15N(2)(K)@26                                 | -0.0206605  | 3006.3772  | 1003.133 | 3006.39819 | 1003.14002 | 3 | 25 | 20.4274 | 0.76  |
| 6 | 55.31 | 57.32 | 3.8  | CDC27_FlexIII  | 99.0 | SLSLNPFLWSPFESCEIGKPDQPQTFK             | Deamidated(N)@5; Propionamide(C)@16; Label: 13C(6)15N(2)(K)@21; Label: 13C(6)15N(2)(K)@29         | 0.0251787   | 3411.68018 | 1138.234 | 3411.65552 | 1138.22583 | 3 | 17 | 20.4197 | 0.76  |
| 6 | 55.31 | 57.32 | 3.8  | CDC27_FlexIII  | 99.0 | VEGMEIYSTTLWLHLQK                       | Label: 13C(6)15N(2)(K)@16                                                                         | 0.00385987  | 1941.979   | 648.3336 | 1941.97498 | 648.332275 | 3 | 15 | 18.6666 | 0.76  |
| 6 | 55.31 | 57.32 | 3.8  | CDC27_FlexIII  | 99.0 | VEGMEIYSTTLWLHLQK                       | Label: 13C(6)15N(2)(K)@16                                                                         | 0.00440919  | 1941.97925 | 648.3337 | 1941.97498 | 648.332275 | 3 | 15 | 18.7121 | 0.76  |
| 6 | 55.31 | 57.32 | 3.8  | CDC27_FlexIII  | 99.0 | YPTFLYK                                 | Label: 13C(6)15N(2)(K)@7                                                                          | -0.00061447 | 938.498657 | 470.2566 | 938.499329 | 470.256928 | 2 | 9  | 17.7815 | 0.76  |
| 6 | 55.31 | 57.32 | 3.8  | CDC27_FlexIII  | 99.0 | YSLNTDSSVSVIDSAVISPDTPVLGTGTSILSK       | Label: 13C(6)15N(2)(K)@33                                                                         | 0.0036066   | 3394.71509 | 1132.579 | 3394.71216 | 1132.578   | 3 | 27 | 19.4266 | 0.76  |
| 6 | 55.31 | 57.32 | 3.8  | CDC27_FlexIII  | 99.0 | YSLNTDSSVSVIDSAVISPDTPVLGTGTSILSK       | Label: 13C(6)15N(2)(K)@33                                                                         | 0.0036066   | 3394.71509 | 1132.579 | 3394.71216 | 1132.578   | 3 | 26 | 19.4292 | 0.76  |
| 6 | 55.31 | 57.32 | 3.8  | CDC27_FlexIII  | 99.0 | YSLNTDSSVSVIDSAVISPDTPVLGTGTSILSK       | Label: 13C(6)15N(2)(K)@33                                                                         | 0.0036066   | 3394.71509 | 1132.579 | 3394.71216 | 1132.578   | 3 | 27 | 19.4392 | 0.76  |
| 6 | 55.31 | 57.32 | 3.8  | CDC27_FlexIII  | 99.0 | YSLNTDSSVSVIDSAVISPDTPVLGTGTSILSK       | Label: 13C(6)15N(2)(K)@33                                                                         | 0.0036066   | 3394.71509 | 1132.579 | 3394.71216 | 1132.578   | 3 | 25 | 19.4698 | 0.76  |
| 7 | 54.8  | 57    | 71.4 | POLR3D_FlexIII | 99.0 | DDFLDDPGLR                              | Label: 13C(6)15N(4)(R)@10                                                                         | 0.0071587   | 1171.54565 | 586.7801 | 1171.53845 | 586.776489 | 2 | 10 | 17.9149 | 77.94 |
| 7 | 54.8  | 57    | 71.4 | POLR3D_FlexIII | 99.0 | DLTLGGVKK                               | Label: 13C(6)15N(2)(K)@8; Label: 13C(6)15N(2)(K)@9                                                | 0.0026426   | 945.585693 | 473.8001 | 945.583008 | 473.798767 | 2 | 10 | 15.4395 | 77.94 |
| 7 | 54.8  | 57    | 71.4 | POLR3D_FlexIII | 99.0 | DYSVAELLR                               | Label: 13C(6)15N(4)(R)@9                                                                          | 0.00084685  | 1010.56445 | 506.2895 | 1010.5636  | 506.289063 | 2 | 9  | 18.5593 | 77.94 |
| 7 | 54.8  | 57    | 71.4 | POLR3D_FlexIII | 99.0 | EEDMEVDIPAVK                            | Label: 13C(6)15N(2)(K)@12                                                                         | -0.00708159 | 1381.64563 | 691.8301 | 1381.65259 | 691.833618 | 2 | 15 | 17.3765 | 77.94 |
| 7 | 54.8  | 57    | 71.4 | POLR3D_FlexIII | 99.0 | EEELLFLQLPDTLPGQPPTQDIKPIK              | Label: 13C(6)15N(2)(K)@23; Label: 13C(6)15N(2)(K)@26                                              | -0.0257991  | 2974.5979  | 992.5399 | 2974.62378 | 992.548523 | 3 | 19 | 19.6951 | 77.94 |
| 7 | 54.8  | 57    | 71.4 | POLR3D_FlexIII | 99.0 | EEELLFLQLPDTLPGQPPTQDIKPIKTEVOGEDQGVVLK | Deamidated(Q)@20; Label: 13C(6)15N(2)(K)@23; Label: 13C(6)15N(2)(K)@26; Label: 13C(6)15N(2)(K)@40 | 0.00031906  | 4479.41065 | 1120.86  | 4479.41016 | 1120.85986 | 4 | 12 | 19.5299 | 77.94 |
| 7 | 54.8  | 57    | 71.4 | POLR3D_FlexIII | 99.0 | EENDEPDVKPWLAGKKEEDMEVDIPAVK            | Label: 13C(6)15N(2)(K)@9; Label: 13C(6)15N(2)(K)@16; Label: 13C(6)15N(2)(K)@28                    | -0.0132206  | 3202.53101 | 801.64   | 3202.54419 | 801.643311 | 4 | 15 | 17.9301 | 77.94 |
| 7 | 54.8  | 57    | 71.4 | POLR3D_FlexIII | 99.0 | EEKPEEIVYK                              | Label: 13C(6)15N(2)(K)@4; Label: 13C(6)15N(2)(K)@10                                               | 0.01204     | 1202.64844 | 401.8901 | 1202.63648 | 401.886108 | 3 | 10 | 13.784  | 77.94 |
| 7 | 54.8  | 57    | 71.4 | POLR3D_FlexIII | 99.0 | ELSLTKEELLFLQLPDTLPGQPPTQDIKPIK         | Label: 13C(6)15N(2)(K)@6; Label: 13C(6)15N(2)(K)@29; Label: 13C(6)15N(2)(K)@32                    | -0.0125158  | 3654.01099 | 914.51   | 3654.02344 | 914.513123 | 4 | 18 | 19.6874 | 77.94 |
| 7 | 54.8  | 57    | 71.4 | POLR3D_FlexIII | 99.0 | ETDEETKQILR                             | Label: 13C(6)15N(2)(K)@7; Label: 13C(6)15N(4)(R)@11                                               | 0.0125487   | 1378.71851 | 460.5801 | 1378.70593 | 460.575897 | 3 | 10 | 14.881  | 77.94 |
| 7 | 54.8  | 57    | 71.4 | POLR3D_FlexIII | 99.0 | GRPEVIQSHSIFEQGAEMMK                    | Label: 13C(6)15N(4)(R)@2; Label: 13C(6)15N(2)(K)@21                                               | -0.0102995  | 2388.1582  | 797.06   | 2388.16846 | 797.063416 | 3 | 23 | 17.1998 | 77.94 |
| 7 | 54.8  | 57    | 71.4 | POLR3D_FlexIII | 99.0 | HRYPTFLYK                               | Label: 13C(6)15N(4)(R)@2; Label: 13C(6)15N(2)(K)@9                                                | 0.00046575  | 1241.66797 | 414.8966 | 1241.66776 | 414.896484 | 3 | 10 | 16.1236 | 77.94 |
| 7 | 54.8  | 57    | 71.4 | POLR3D_FlexIII | 99.0 | IKEPKEEVTYK                             | Label: 13C(6)15N(2)(K)@2; Label: 13C(6)15N(2)(K)@6; Label: 13C(6)15N(2)(K)@12                     | -0.00427972 | 1451.82544 | 726.92   | 1451.82971 | 726.92218  | 2 | 19 | 13.7764 | 77.94 |
| 7 | 54.8  | 57    | 71.4 | POLR3D_FlexIII | 99.0 | LAENACTLADLTGEOGVK                      | Propionamide(C)@6; Label: 13C(6)15N(2)(K)@18                                                      | 0.00095262  | 1910.95093 | 956.4827 | 1910.94995 | 956.48239  | 2 | 24 | 17.7755 | 77.94 |
| 7 | 54.8  | 57    | 71.4 | POLR3D_FlexIII | 99.0 | LVCSPDFESLLDHK                          | Propionamide(C)@3; Label: 13C(6)15N(2)(K)@14                                                      | -0.00730386 | 1680.81995 |          |            |            |   |    |         |       |

|   |      |    |      |               |      |                                  |                                                                                                           |                            |             |            |          |            |            |   |    |         |       |
|---|------|----|------|---------------|------|----------------------------------|-----------------------------------------------------------------------------------------------------------|----------------------------|-------------|------------|----------|------------|------------|---|----|---------|-------|
| 7 | 54.8 | 57 | 71.4 | POLR3D_FlexII | 99.0 | TVDVSDMGPSHIINIK                 | Label: 13C(6)15N(2)(K)@16                                                                                 |                            | 3.25E-06    | 1732.89087 | 578.6376 | 1732.89087 | 578.637573 | 3 | 13 | 26.5677 | 77.94 |
| 7 | 54.8 | 57 | 71.4 | POLR3D_FlexII | 99.0 | VOLLGK                           | Label: 13C(6)15N(2)(K)@7                                                                                  |                            | 0.00029066  | 777.520691 | 389.7676 | 777.520386 | 389.767456 | 2 | 9  | 17.1593 | 77.94 |
| 7 | 54.8 | 57 | 71.4 | POLR3D_FlexII | 99.0 | DLTGSGVK                         | Label: 13C(6)15N(2)(K)@8; Label: 13C(6)15N(2)(K)@9                                                        | missed K-K@8               | 0.00105569  | 945.584045 | 473.7993 | 945.583008 | 473.798767 | 2 | 10 | 15.5076 | 77.94 |
| 7 | 54.8 | 57 | 71.4 | POLR3D_FlexII | 99.0 | EELLFLQLPDTLPGQPPTQDIKPIK        | Deamidated(Q)@8; Label: 13C(6)15N(2)(K)@23; Label: 13C(6)15N(2)(K)@26                                     |                            | 0.0102656   | 2975.61792 | 992.8799 | 2975.60791 | 992.876526 | 3 | 18 | 19.69   | 77.94 |
| 7 | 54.8 | 57 | 71.4 | POLR3D_FlexII | 99.0 | EENDEPDVKPWLAGPKEEDMEVDIPAVK     | Deamidated(N)@3; Label: 13C(6)15N(2)(K)@9; Label: 13C(6)15N(2)(K)@16; Label: 13C(6)15N(2)(K)@28           | missed K-E@16              | 0.00276357  | 3203.53101 | 801.89   | 3203.52832 | 801.889343 | 4 | 11 | 17.9174 | 77.94 |
| 7 | 54.8 | 57 | 71.4 | POLR3D_FlexII | 99.0 | ELSLTKEEELLFLQPLDTLPGQPPTQDIKPIK | Label: 13C(6)15N(2)(K)@2; Label: 13C(6)15N(2)(K)@14; Label: 13C(6)15N(2)(K)@29; Label: 13C(6)15N(2)(K)@32 | missed K-E@6               | 0.00348633  | 3655.01099 | 914.76   | 3655.00732 | 914.759155 | 4 | 16 | 19.6544 | 77.94 |
| 7 | 54.8 | 57 | 71.4 | POLR3D_FlexII | 99.0 | GRPEVIQSHSIFEGGPAEMMK            | Label: 13C(6)15N(4)(R)@2; Deamidated(Q)@14; Label: 13C(6)15N(2)(K)@21                                     |                            | 0.0257652   | 2389.17822 | 797.4    | 2389.15259 | 797.39148  | 3 | 15 | 17.2149 | 77.94 |
| 7 | 54.8 | 57 | 71.4 | POLR3D_FlexII | 99.0 | GRPEVIQSHSIFEGGPAEMMK            | Label: 13C(6)15N(4)(R)@2; Label: 13C(6)15N(2)(K)@21                                                       |                            | -7.74E-05   | 2388.16846 | 598.0494 | 2388.16846 | 598.049377 | 4 | 20 | 17.2503 | 77.94 |
| 7 | 54.8 | 57 | 71.4 | POLR3D_FlexII | 99.0 | GRPEVIQSHSIFEGGPAEMMK            | Label: 13C(6)15N(4)(R)@2; Label: 13C(6)15N(2)(K)@21                                                       |                            | 0.00260818  | 2388.1709  | 598.05   | 2388.16846 | 598.049377 | 4 | 19 | 17.3084 | 77.94 |
| 7 | 54.8 | 57 | 71.4 | POLR3D_FlexII | 99.0 | GRPEVIQSHSIFEGGPAEMMK            | Label: 13C(6)15N(4)(R)@2; Deamidated(Q)@14; Label: 13C(6)15N(2)(K)@21                                     |                            | 0.0185923   | 2389.1709  | 598.3    | 2389.15259 | 598.29541  | 4 | 16 | 17.3109 | 77.94 |
| 7 | 54.8 | 57 | 71.4 | POLR3D_FlexII | 99.0 | HRYPFTLYK                        | Label: 13C(6)15N(4)(R)@2; Label: 13C(6)15N(2)(K)@9                                                        | missed R-Y@2               | 0.0109028   | 1241.67847 | 414.9001 | 1241.6676  | 414.896484 | 3 | 10 | 15.9933 | 77.94 |
| 7 | 54.8 | 57 | 71.4 | POLR3D_FlexII | 99.0 | HRYPFTLYK                        | Label: 13C(6)15N(4)(R)@2; Label: 13C(6)15N(2)(K)@9                                                        | missed R-Y@2               | 0.00046575  | 1241.66797 | 414.8966 | 1241.6676  | 414.896484 | 3 | 10 | 16.0534 | 77.94 |
| 7 | 54.8 | 57 | 71.4 | POLR3D_FlexII | 99.0 | IKEEPKEEVTVK                     | Label: 13C(6)15N(2)(K)@2; Label: 13C(6)15N(2)(K)@6; Label: 13C(6)15N(2)(K)@12                             | missed K-E@2; missed K-E@6 | -0.00125969 | 1451.82849 | 484.9501 | 1451.82971 | 484.950531 | 3 | 15 | 13.6781 | 77.94 |
| 7 | 54.8 | 57 | 71.4 | POLR3D_FlexII | 99.0 | IKEEPKEEVTVK                     | Label: 13C(6)15N(2)(K)@2; Label: 13C(6)15N(2)(K)@6; Label: 13C(6)15N(2)(K)@12                             | missed K-E@2; missed K-E@6 | -0.0183813  | 1451.8114  | 363.9601 | 1451.82971 | 363.964722 | 4 | 12 | 13.6906 | 77.94 |
| 7 | 54.8 | 57 | 71.4 | POLR3D_FlexII | 99.0 | LAENACTLADLTEGOVGK               | Propionamide(C)@6; Label: 13C(6)15N(2)(K)@18                                                              |                            | 0.00095262  | 1910.95093 | 956.4827 | 1910.94995 | 956.482239 | 2 | 23 | 17.7324 | 77.94 |
| 7 | 54.8 | 57 | 71.4 | POLR3D_FlexII | 99.0 | LAENACTLADLTEGOVGK               | Propionamide(C)@6; Label: 13C(6)15N(2)(K)@18                                                              |                            | 0.00095262  | 1910.95093 | 956.4827 | 1910.94995 | 956.482239 | 2 | 25 | 17.7335 | 77.94 |
| 7 | 54.8 | 57 | 71.4 | POLR3D_FlexII | 99.0 | LAENACTLADLTEGOVGK               | Propionamide(C)@6; Label: 13C(6)15N(2)(K)@18                                                              |                            | 0.00095262  | 1910.95093 | 956.4827 | 1910.94995 | 956.482239 | 2 | 25 | 17.7477 | 77.94 |
| 7 | 54.8 | 57 | 71.4 | POLR3D_FlexII | 99.0 | LVCSPDFESLDDHK                   | Propionamide(C)@3; Label: 13C(6)15N(2)(K)@14                                                              |                            | -0.00199381 | 1680.82507 | 561.2823 | 1680.82727 | 561.28302  | 3 | 17 | 18.2185 | 77.94 |
| 7 | 54.8 | 57 | 71.4 | POLR3D_FlexII | 99.0 | LVCSPDFESLDDHK                   | Propionamide(C)@3; Label: 13C(6)15N(2)(K)@14                                                              |                            | -0.00199381 | 1680.82507 | 561.2823 | 1680.82727 | 561.28302  | 3 | 17 | 18.221  | 77.94 |
| 7 | 54.8 | 57 | 71.4 | POLR3D_FlexII | 99.0 | LVCSPDFESLDDHK                   | Propionamide(C)@3; Label: 13C(6)15N(2)(K)@14                                                              |                            | -0.00199381 | 1680.82507 | 561.2823 | 1680.82727 | 561.28302  | 3 | 18 | 18.2261 | 77.94 |
| 7 | 54.8 | 57 | 71.4 | POLR3D_FlexII | 99.0 | LVCSPDFESLDDHK                   | Propionamide(C)@3; Label: 13C(6)15N(2)(K)@14                                                              |                            | 0.00121175  | 1680.82849 | 841.4215 | 1680.82727 | 841.420898 | 2 | 15 | 18.2488 | 77.94 |
| 7 | 54.8 | 57 | 71.4 | POLR3D_FlexII | 99.0 | LVCSPDFESLDDHK                   | Propionamide(C)@3; Label: 13C(6)15N(2)(K)@14                                                              |                            | 0.00121175  | 1680.82849 | 841.4215 | 1680.82727 | 841.420898 | 2 | 17 | 18.2514 | 77.94 |
| 7 | 54.8 | 57 | 71.4 | POLR3D_FlexII | 99.0 | LVCSPDFESLDDHK                   | Propionamide(C)@3; Label: 13C(6)15N(2)(K)@14                                                              |                            | 0.00121175  | 1680.82849 | 841.4215 | 1680.82727 | 841.420898 | 2 | 14 | 18.2539 | 77.94 |
| 7 | 54.8 | 57 | 71.4 | POLR3D_FlexII | 99.0 | LVCSPDFESLDDHK                   | Propionamide(C)@3; Label: 13C(6)15N(2)(K)@14                                                              |                            | -0.00220622 | 1680.82507 | 841.4198 | 1680.82727 | 841.420898 | 2 | 15 | 18.3189 | 77.94 |
| 7 | 54.8 | 57 | 71.4 | POLR3D_FlexII | 99.0 | LVCSPDFESLDDHK                   | Propionamide(C)@3; Label: 13C(6)15N(2)(K)@14                                                              |                            | 0.00038656  | 1680.82739 | 561.2831 | 1680.82727 | 561.28302  | 3 | 15 | 18.3239 | 77.94 |
| 7 | 54.8 | 57 | 71.4 | POLR3D_FlexII | 99.0 | LVCSPDFESLDDHK                   | Propionamide(C)@3; Label: 13C(6)15N(2)(K)@14                                                              |                            | -0.00730386 | 1680.81995 | 561.2806 | 1680.82727 | 561.28302  | 3 | 15 | 26.5499 | 77.94 |
| 7 | 54.8 | 57 | 71.4 | POLR3D_FlexII | 99.0 | LVCSPDFESLDDHK                   | Propionamide(C)@3; Label: 13C(6)15N(2)(K)@14                                                              |                            | -0.00730386 | 1680.81995 | 561.2806 | 1680.82727 | 561.28302  | 3 | 13 | 26.5626 | 77.94 |
| 7 | 54.8 | 57 | 71.4 | POLR3D_FlexII | 99.0 | MLEKDDFLDDPGLR                   | Label: 13C(6)15N(2)(K)@4; Label: 13C(6)15N(4)(R)@14                                                       | missed K-D@4               | 0.00113438  | 1680.81567 | 561.2792 | 1680.81482 | 561.27887  | 3 | 20 | 17.49   | 77.94 |
| 7 | 54.8 | 57 | 71.4 | POLR3D_FlexII | 99.0 | MLEKDDFLDDPGLR                   | Label: 13C(6)15N(2)(K)@4; Label: 13C(6)15N(4)(R)@14                                                       | missed K-D@4               | 0.00113438  | 1680.81567 | 561.2792 | 1680.81482 | 561.27887  | 3 | 18 | 17.4926 | 77.94 |
| 7 | 54.8 | 57 | 71.4 | POLR3D_FlexII | 99.0 | MLEKDDFLDDPGLR                   | Label: 13C(6)15N(2)(K)@4; Label: 13C(6)15N(4)(R)@14                                                       | missed K-D@4               | 0.00113438  | 1680.81567 | 561.2792 | 1680.81482 | 561.27887  | 3 | 20 | 17.5225 | 77.94 |
| 7 | 54.8 | 57 | 71.4 | POLR3D_FlexII | 99.0 | MLEKDDFLDDPGLR                   | Label: 13C(6)15N(2)(K)@4; Label: 13C(6)15N(4)(R)@14                                                       | missed K-D@4               | 0.0106266   | 1680.82544 | 841.42   | 1680.81482 | 841.414673 | 2 | 21 | 17.5251 | 77.94 |
| 7 | 54.8 | 57 | 71.4 | POLR3D_FlexII | 99.0 | MLEKDDFLDDPGLR                   | Label: 13C(6)15N(2)(K)@4; Label: 13C(6)15N(4)(R)@14                                                       | missed K-D@4               | 0.0018668   | 1680.81665 | 561.2795 | 1680.81482 | 561.27887  | 3 | 17 | 17.5603 | 77.94 |
| 7 | 54.8 | 57 | 71.4 | POLR3D_FlexII | 99.0 | NMPVQLPLAHSGWLFK                 | Label: 13C(6)15N(2)(K)@16                                                                                 |                            | -0.00399183 | 1844.98108 | 616.001  | 1844.98511 | 616.002319 | 3 | 14 | 19.226  | 77.94 |
| 7 | 54.8 | 57 | 71.4 | POLR3D_FlexII | 99.0 | NMPVQLPLAHSGWLFK                 | Label: 13C(6)15N(2)(K)@16                                                                                 |                            | -0.00399183 | 1844.98108 | 616.001  | 1844.98511 | 616.002319 | 3 | 14 | 19.231  | 77.94 |
| 7 | 54.8 | 57 | 71.4 | POLR3D_FlexII | 99.0 | NMPVQLPLAHSGWLFK                 | Label: 13C(6)15N(2)(K)@16                                                                                 |                            | -0.00527357 | 1844.97961 | 616.0005 | 1844.98511 | 616.002319 | 3 | 14 | 19.2538 | 77.94 |
| 7 | 54.8 | 57 | 71.4 | POLR3D_FlexII | 99.0 | NMPVQLPLAHSGWLFK                 | Label: 13C(6)15N(2)(K)@16                                                                                 |                            | -0.00527357 | 1844.97961 | 616.0005 | 1844.98511 | 616.002319 | 3 | 14 | 19.2817 | 77.94 |
| 7 | 54.8 | 57 | 71.4 | POLR3D_FlexII | 99.0 | NMPVQLPLAHSGWLFK                 | Label: 13C(6)15N(2)(K)@16                                                                                 |                            | -0.0084767  | 1844.97669 | 923.4956 | 1844.98511 | 923.499817 | 2 | 20 | 19.3449 | 77.94 |
| 7 | 54.8 | 57 | 71.4 | POLR3D_FlexII | 99.0 | NMPVQLPLAHSGWLFK                 | Label: 13C(6)15N(2)(K)@16                                                                                 |                            | -0.0084767  | 1844.97669 | 923.4956 | 1844.98511 | 923.499817 | 2 | 21 | 19.3475 | 77.94 |
| 7 | 54.8 | 57 | 71.4 | POLR3D_FlexII | 99.0 | NMPVQLPLAHSGWLFK                 | Label: 13C(6)15N(2)(K)@16                                                                                 |                            | -0.0084767  | 1844.97669 | 923.4956 | 1844.98511 | 923.499817 | 2 | 16 | 19.3526 | 77.94 |
| 7 | 54.8 | 57 | 71.4 | POLR3D_FlexII | 99.0 | NMPVQLPLAHSGWLFK                 | Label: 13C(6)15N(2)(K)@16                                                                                 |                            | -0.00856946 | 1844.97669 | 615.9995 | 1844.98511 | 616.002319 | 3 | 11 | 19.3602 | 77.94 |
| 7 | 54.8 | 57 | 71.4 | POLR3D_FlexII | 99.0 | NMPVQLPLAHSGWLFK                 | Label: 13C(6)15N(2)(K)@16                                                                                 |                            | -0.00820325 | 1844.97693 | 615.9996 | 1844.98511 | 616.002319 | 3 | 10 | 19.4158 | 77.94 |
| 7 | 54.8 | 57 | 71.4 | POLR3D_FlexII | 99.0 | NMPVQLPLAHSGWLFK                 | Label: 13C(6)15N(2)(K)@16                                                                                 |                            | -0.00820325 | 1844.97693 | 615.9996 | 1844.98511 | 616.002319 | 3 | 10 | 19.4107 | 77.94 |
| 7 | 54.8 | 57 | 71.4 | POLR3D_FlexII | 99.0 | RPAPPLTPGR                       | Label: 13C(6)15N(4)(R)@1; Label: 13C(6)15N(4)(R)@10                                                       |                            | 0.00029635  | 1080.6311  | 541.3228 | 1080.63074 | 541.322632 | 2 | 13 | 14.2348 | 77.94 |
| 7 | 54.8 | 57 | 71.4 | POLR3D_FlexII | 99.0 | RPAPPLTPGR                       | Label: 13C(6)15N(4)(R)@1; Label: 13C(6)15N(4)(R)@10                                                       |                            | 0.00029635  | 1080.6311  | 541.3228 | 1080.63074 | 541.322632 | 2 | 13 | 14.2373 | 77.94 |
| 7 | 54.8 | 57 | 71.4 | POLR3D_FlexII | 99.0 | RPAPPLTPGR                       | Label: 13C(6)15N(4)(R)@1; Label: 13C(6)15N(4)(R)@10                                                       |                            | 0.00029635  | 1080.6311  | 541.3228 | 1080.63074 | 541.322632 | 2 | 13 | 14.2524 | 77.94 |
| 7 | 54.8 | 57 | 71.4 | POLR3D_FlexII | 99.0 | RPAPPLTPGR                       | Label: 13C(6)15N(4)(R)@1; Label: 13C(6)15N(4)(R)@10                                                       |                            | -0.0002847  | 1080.63037 | 361.2174 | 1080.63074 | 361.217499 | 3 | 12 | 14.2423 | 77.94 |
| 7 | 54.8 | 57 | 71.4 | POLR3D_FlexII | 99.0 | RPAPPLTPGR                       | Label: 13C(6)15N(4)(R)@1; Label: 13C(6)15N(4)(R)@10                                                       |                            | 0.00786349  | 1080.63843 | 361.2201 | 1080.63074 | 361.217499 | 3 | 11 | 14.2072 | 77.94 |
| 7 | 54.8 | 57 | 71.4 | POLR3D_FlexII | 99.0 | SRDLTLGGVK                       | Label: 13C(6)15N(4)(R)@2; Label: 13C(6)15N(2)(K)@10                                                       | missed R-D@2               | -0.00036979 | 1062.61475 | 355.2122 | 1062.61523 | 355.212341 | 3 | 10 | 15.2945 | 77.94 |
| 7 | 54.8 | 57 | 71.4 | POLR3D_FlexII | 99.0 | TEVQGEDGQVLIJ                    | Label: 13C(6)15N(2)(K)@14                                                                                 |                            | 0.00087555  | 1521.81384 | 761.9142 | 1521.81299 | 761.913757 | 2 | 20 | 16.6722 | 77.94 |
| 7 | 54.8 | 57 | 71.4 | POLR3D_FlexII | 99.0 | TEVQGEDGQVLIJ                    | Label: 13C(6)15N(2)(K)@14                                                                                 |                            | 0.00087555  | 1521.81384 | 761.9142 | 1521.81299 | 761.913757 | 2 | 19 | 16.6849 | 77.94 |
| 7 | 54.8 | 57 | 71.4 | POLR3D_FlexII | 99.0 | TEVQGEDGQVLIJ                    | Label: 13C(6)15N(2)(K)@14                                                                                 |                            | -0.00034515 | 1521.81262 | 761.9136 | 1521.81299 | 761.913757 | 2 | 17 | 16.7026 | 77.94 |
| 7 | 54.8 | 57 | 71.4 | POLR3D_FlexII | 99.0 | TEVQGEDGQVLIJ                    | Label: 13C(6)15N(2)(K)@14                                                                                 |                            | 0.00050934  | 1521.81348 | 761.914  | 1521.81299 | 761.913757 | 2 | 16 | 16.7608 | 77.94 |
| 7 | 54.8 | 57 | 71.4 | POLR3D_FlexII | 99.0 | TEVQGEDGQVLIJ                    | Label: 13C(6)15N(2)(K)@14                                                                                 |                            | -0.00034515 | 1521.81262 | 761.9136 | 1521.81299 | 761.913757 | 2 | 13 | 26.5271 | 77.94 |
| 7 | 54.8 | 57 | 71.4 | POLR3D_FlexII | 99.0 | TEVQGEDGQVLIJ                    | Deamidated(O)@4; Label: 13C(6)15N(2)(K)@14                                                                |                            | 0.00843696  | 1522.80542 | 762.41   | 1522.797   | 762.405762 | 2 | 12 | 26.4856 | 77.94 |
| 7 | 54.8 | 57 | 71.4 | POLR3D_FlexII | 99.0 | TFTPNISR                         | Label: 13C(6)15N(4)(R)@9                                                                                  |                            | -0.00019649 | 1057.57922 | 529.7969 | 1057.57959 | 529.797058 | 2 | 10 | 16.9828 | 77.94 |
| 7 | 54.8 | 57 | 71.4 | POLR3D_FlexII | 99.0 | TFTPNISR                         | Label: 13C(6)15N(4)(R)@9                                                                                  |                            | 0.00029179  | 1057.57983 | 529.7972 | 1057.57959 | 529.797058 | 2 | 10 | 17.0106 | 77.94 |
| 7 | 54.8 | 57 | 71.4 |               |      |                                  |                                                                                                           |                            |             |            |          |            |            |   |    |         |       |

|   |       |       |      |               |      |                                       |                                                                                                                   |                    |             |            |            |            |            |    |         |         |      |
|---|-------|-------|------|---------------|------|---------------------------------------|-------------------------------------------------------------------------------------------------------------------|--------------------|-------------|------------|------------|------------|------------|----|---------|---------|------|
| 7 | 54.8  | 57    | 71.4 | POLR3D_FlexII | 99.0 | TVDVSDMGPSHIINIK                      | Label:13C(6)15N(2)(K)@16                                                                                          | 0.00183431         | 1732.8927   | 578.6382   | 1732.89087 | 578.637573 | 3          | 13 | 17.4117 | 77.94   |      |
| 7 | 54.8  | 57    | 71.4 | POLR3D_FlexII | 99.0 | TVDVSDMGPSHIINIK                      | Label:13C(6)15N(2)(K)@16                                                                                          | 0.00137776         | 1732.89233  | 867.4534   | 1732.89087 | 867.452759 | 2          | 19 | 17.4395 | 77.94   |      |
| 7 | 54.8  | 57    | 71.4 | POLR3D_FlexII | 99.0 | TVDVSDMGPSHIINIK                      | Label:13C(6)15N(2)(K)@16                                                                                          | 0.00110189         | 1732.89185  | 578.6379   | 1732.89087 | 578.637573 | 3          | 12 | 17.4471 | 77.94   |      |
| 7 | 54.8  | 57    | 71.4 | POLR3D_FlexII | 99.0 | TVDVSDMGPSHIINIK                      | Label:13C(6)15N(2)(K)@16                                                                                          | 3.25E-06           | 1732.89087  | 578.6376   | 1732.89087 | 578.637573 | 3          | 12 | 26.555  | 77.94   |      |
| 7 | 54.8  | 57    | 71.4 | POLR3D_FlexII | 99.0 | YPTFLYK                               | Label:13C(6)15N(2)(K)@7                                                                                           | -0.00061447        | 938.498657  | 470.2566   | 938.499329 | 470.256928 | 2          | 9  | 17.7815 | 77.94   |      |
| 8 | 43.77 | 47.77 | 39.1 | ODF2_FlexII   | 99.0 | AEVEAIMEQLK                           | Label:13C(6)15N(2)(K)@11                                                                                          | 0.00116424         | 1267.65845  | 634.8365   | 1267.65735 | 634.835938 | 2          | 14 | 18.3802 | 9.70    |      |
| 8 | 43.77 | 47.77 | 39.1 | ODF2_FlexII   | 99.0 | ASFAPMEDK                             | Label:13C(6)15N(2)(K)@9                                                                                           | -0.00117183        | 1002.45606  | 502.2353   | 1002.45715 | 502.23587  | 2          | 11 | 16.0837 | 9.70    |      |
| 8 | 43.77 | 47.77 | 39.1 | ODF2_FlexII   | 99.0 | DFTILQK                               | Label:13C(6)15N(2)(K)@7                                                                                           | -0.00306463        | 871.48645   | 436.7505   | 871.489441 | 436.752014 | 2          | 7  | 17.6072 | 9.70    |      |
| 8 | 43.77 | 47.77 | 39.1 | ODF2_FlexII   | 99.0 | IDSLMNAVGLCK                          | Propionamide(C)@10; Label:13C(6)15N(2)(K)@12                                                                      | -0.0015621         | 1341.68604  | 671.8503   | 1341.68762 | 671.851074 | 2          | 15 | 18.3986 | 9.70    |      |
| 8 | 43.77 | 47.77 | 39.1 | ODF2_FlexII   | 99.0 | IEHQGDKLEMAR                          | Label:13C(6)15N(2)(K)@7; Label:13C(6)15N(4)(R)@12                                                                 | -0.00290252        | 1443.72302  | 482.2483   | 1443.72595 | 482.249237 | 3          | 13 | 14.2724 | 9.70    |      |
| 8 | 43.77 | 47.77 | 39.1 | ODF2_FlexII   | 99.0 | KEELEEVAAHAEATEHENTVLR                | Label:13C(6)15N(2)(K)@1; Label:13C(6)15N(4)(R)@22                                                                 | 0.00236305         | 2622.29126  | 656.5801   | 2622.28931 | 656.57959  | 4          | 20 | 17.9163 | 9.70    |      |
| 8 | 43.77 | 47.77 | 39.1 | ODF2_FlexII   | 99.0 | LEADEVAAQLER                          | Label:13C(6)15N(4)(R)@12                                                                                          | 0.00502011         | 1352.68604  | 677.3503   | 1352.68115 | 677.347839 | 2          | 15 | 17.5087 | 9.70    |      |
| 8 | 43.77 | 47.77 | 39.1 | ODF2_FlexII   | 99.0 | LLLLLQDKDKEVEELLQEIQCEK               | Label:13C(6)15N(2)(K)@8; Label:13C(6)15N(2)(K)@10; Propionamide(C)@21; Label:13C(6)15N(2)(K)@23                   | 0.00633015         | 2863.57422  | 716.9008   | 2863.56787 | 716.899231 | 4          | 14 | 20.0166 | 9.70    |      |
| 8 | 43.77 | 47.77 | 39.1 | ODF2_FlexII   | 99.0 | LMEQQGALLK                            | Label:13C(6)15N(2)(K)@10                                                                                          | -0.00023402        | 1137.63049  | 569.8225   | 1137.63074 | 569.822632 | 2          | 12 | 16.6729 | 9.70    |      |
| 8 | 43.77 | 47.77 | 39.1 | ODF2_FlexII   | 99.0 | LMEQQGALLKR                           | Label:13C(6)15N(2)(K)@10; Label:13C(6)15N(4)(R)@11                                                                | -0.00492665        | 1303.73523  | 435.5857   | 1303.74011 | 435.587311 | 3          | 10 | 15.7401 | 9.70    |      |
| 8 | 43.77 | 47.77 | 39.1 | ODF2_FlexII   | 99.0 | LSDSLTEDDDSGHCK                       | Propionamide(C)@14; Label:13C(6)15N(2)(K)@15                                                                      | -0.00255047        | 1699.70618  | 567.576    | 1699.70862 | 567.576843 | 3          | 15 | 14.3305 | 9.70    |      |
| 8 | 43.77 | 47.77 | 39.1 | ODF2_FlexII   | 99.0 | LVEAEMDGAATAK                         | Label:13C(6)15N(2)(K)@13                                                                                          | 0.00056631         | 1282.63245  | 642.3235   | 1282.63184 | 642.323181 | 2          | 16 | 15.6166 | 9.70    |      |
| 8 | 43.77 | 47.77 | 39.1 | ODF2_FlexII   | 99.0 | NIDLTAISDLR                           | Label:13C(6)15N(4)(R)@12                                                                                          | -0.00769166        | 1352.74622  | 677.3804   | 1352.75391 | 677.384216 | 2          | 16 | 20.4511 | 9.70    |      |
| 8 | 43.77 | 47.77 | 39.1 | ODF2_FlexII   | 99.0 | NPPHCLFITPPSSEK                       | Propionamide(C)@5; Label:13C(6)15N(2)(K)@15                                                                       | 0.0023217          | 1726.84619  | 576.6227   | 1726.84399 | 576.621948 | 3          | 14 | 15.9728 | 9.70    |      |
| 8 | 43.77 | 47.77 | 39.1 | ODF2_FlexII   | 99.0 | QFQSQLADLQQLPDILK                     | Gln->pyro-Glu@N-term; Label:13C(6)15N(2)(K)@17                                                                    | -0.0176757         | 1975.03284  | 988.5237   | 1975.05054 | 988.532593 | 2          | 18 | 20.5933 | 9.70    |      |
| 8 | 43.77 | 47.77 | 39.1 | ODF2_FlexII   | 99.0 | QKELLQK                               | Gln->pyro-Glu@N-term; Label:13C(6)15N(2)(K)@2; Label:13C(6)15N(2)(K)@8                                            | -0.00188916        | 997.612488  | 499.8135   | 997.614258 | 499.814423 | 2          | 12 | 16.799  | 9.70    |      |
| 8 | 43.77 | 47.77 | 39.1 | ODF2_FlexII   | 99.0 | QMTCTDINTLTR                          | Gln->pyro-Glu@N-term; Propionamide(C)@4; Label:13C(6)15N(4)(R)@12                                                 | 0.00371455         | 1459.67127  | 730.8429   | 1459.66748 | 730.841003 | 2          | 13 | 17.8808 | 9.70    |      |
| 8 | 43.77 | 47.77 | 39.1 | ODF2_FlexII   | 99.0 | REEAIHQSQLR                           | Label:13C(6)15N(4)(R)@1; Label:13C(6)15N(4)(R)@11                                                                 | 0.00458285         | 1385.73242  | 462.9181   | 1385.72791 | 462.916565 | 3          | 12 | 13.3211 | 9.70    |      |
| 8 | 43.77 | 47.77 | 39.1 | ODF2_FlexII   | 99.0 | SSYANVFGDGYSTFLTSSPIR                 | Label:13C(6)15N(4)(R)@22                                                                                          | 0.00615347         | 2375.13745  | 1188.576   | 2375.13076 | 1188.57275 | 2          | 16 | 19.8364 | 9.70    |      |
| 8 | 43.77 | 47.77 | 39.1 | ODF2_FlexII   | 99.0 | TKNPPHCLFITPPSSEK                     | Label:13C(6)15N(2)(K)@2; Propionamide(C)@7; Label:13C(6)15N(2)(K)@17                                              | 0.00330012         | 1964.00403  | 655.6753   | 1964.00085 | 655.674194 | 3          | 19 | 15.4014 | 9.70    |      |
| 8 | 43.77 | 47.77 | 39.1 | ODF2_FlexII   | 99.0 | TRLADEVAAQLER                         | Label:13C(6)15N(4)(R)@2; Label:13C(6)15N(4)(R)@14                                                                 | misses R-L@2       | -0.0132466  | 1619.82495 | 540.9489   | 1619.83814 | 540.953308 | 3  | 15      | 16.9456 | 9.70 |
| 8 | 43.77 | 47.77 | 39.1 | ODF2_FlexII   | 99.0 | AEVEAIMEQLK                           | Label:13C(6)15N(2)(K)@11                                                                                          | 0.00800026         | 1267.66553  | 634.84     | 1267.65735 | 634.835938 | 2          | 13 | 18.3499 | 9.70    |      |
| 8 | 43.77 | 47.77 | 39.1 | ODF2_FlexII   | 99.0 | AYPTFLYK                              | Label:13C(6)15N(2)(K)@8                                                                                           | cleaved P-A@N-term | 0.00031298  | 1009.53668 | 505.7756   | 1009.53644 | 505.775482 | 2  | 10      | 17.8599 | 9.70 |
| 8 | 43.77 | 47.77 | 39.1 | ODF2_FlexII   | 99.0 | AYPTFLYK                              | Label:13C(6)15N(2)(K)@8                                                                                           | cleaved P-A@N-term | 0.00103055  | 1009.53748 | 505.776    | 1009.53644 | 505.775482 | 2  | 10      | 17.578  | 9.70 |
| 8 | 43.77 | 47.77 | 39.1 | ODF2_FlexII   | 99.0 | AYPTFLYK                              | Label:13C(6)15N(2)(K)@8                                                                                           | cleaved P-A@N-term | 0.00078641  | 1009.53729 | 505.7759   | 1009.53644 | 505.775482 | 2  | 10      | 17.6741 | 9.70 |
| 8 | 43.77 | 47.77 | 39.1 | ODF2_FlexII   | 99.0 | AYPTFLYK                              | Label:13C(6)15N(2)(K)@8                                                                                           | cleaved P-A@N-term | 0.00103055  | 1009.53748 | 505.776    | 1009.53644 | 505.775482 | 2  | 10      | 17.7577 | 9.70 |
| 8 | 43.77 | 47.77 | 39.1 | ODF2_FlexII   | 99.0 | IDSLMNAVGLCK                          | Deamidated(N)@6; Propionamide(C)@10; Label:13C(6)15N(2)(K)@12                                                     | 0.0144331          | 1342.68604  | 672.3503   | 1342.67163 | 672.343079 | 2          | 10 | 18.4088 | 9.70    |      |
| 8 | 43.77 | 47.77 | 39.1 | ODF2_FlexII   | 99.0 | KEELEEVAAHAEATEHENTVLR                | Label:13C(6)15N(2)(K)@1; Deamidated(N)@18; Label:13C(6)15N(4)(R)@22                                               | 0.0324583          | 2623.30566  | 875.4425   | 2623.27319 | 875.431702 | 3          | 12 | 18.0204 | 9.70    |      |
| 8 | 43.77 | 47.77 | 39.1 | ODF2_FlexII   | 99.0 | LLLLLQDKDKEVEELLQEIQCEK               | Label:13C(6)15N(2)(K)@8; Label:13C(6)15N(2)(K)@10; Propionamide(C)@21; Label:13C(6)15N(2)(K)@23                   | 0.0104814          | 2863.57837  | 955.5334   | 2863.56787 | 955.529077 | 3          | 20 | 19.9583 | 9.70    |      |
| 8 | 43.77 | 47.77 | 39.1 | ODF2_FlexII   | 99.0 | LLLLLQDKDKEVEELLQEIQCEK               | Deamidated(Q)@6; Label:13C(6)15N(2)(K)@8; Label:13C(6)15N(2)(K)@10; Propionamide(C)@21; Label:13C(6)15N(2)(K)@23  | 0.0163446          | 2864.56812  | 955.8633   | 2864.55176 | 955.85791  | 3          | 15 | 19.9609 | 9.70    |      |
| 8 | 43.77 | 47.77 | 39.1 | ODF2_FlexII   | 99.0 | LLLLLQDKDKEVEELLQEIQCEK               | Label:13C(6)15N(2)(K)@8; Label:13C(6)15N(2)(K)@10; Deamidated(Q)@17; Propionamide(C)@21; Label:13C(6)15N(2)(K)@23 | -0.0177142         | 2864.53418  | 717.1408   | 2864.55176 | 717.145264 | 4          | 12 | 19.9912 | 9.70    |      |
| 8 | 43.77 | 47.77 | 39.1 | ODF2_FlexII   | 99.0 | LSDSLTEDDDSGHCK                       | Propionamide(C)@14; Label:13C(6)15N(2)(K)@15                                                                      | 0.00715422         | 1699.71582  | 567.5792   | 1699.70862 | 567.576843 | 3          | 15 | 14.2371 | 9.70    |      |
| 8 | 43.77 | 47.77 | 39.1 | ODF2_FlexII   | 99.0 | LSDSLTEDDDSGHCK                       | Propionamide(C)@14; Label:13C(6)15N(2)(K)@15                                                                      | 0.00623949         | 1699.71484  | 850.8647   | 1699.70862 | 850.861633 | 2          | 19 | 14.2951 | 9.70    |      |
| 8 | 43.77 | 47.77 | 39.1 | ODF2_FlexII   | 99.0 | LSDSLTEDDDSGHCK                       | Propionamide(C)@14; Label:13C(6)15N(2)(K)@15                                                                      | 0.00623949         | 1699.71484  | 850.8647   | 1699.70862 | 850.861633 | 2          | 19 | 14.3002 | 9.70    |      |
| 8 | 43.77 | 47.77 | 39.1 | ODF2_FlexII   | 99.0 | LVEAEMDGAATAK                         | Label:13C(6)15N(2)(K)@13                                                                                          | 0.00215324         | 1282.63403  | 642.3243   | 1282.63184 | 642.323181 | 2          | 16 | 15.609  | 9.70    |      |
| 8 | 43.77 | 47.77 | 39.1 | ODF2_FlexII   | 99.0 | LVEAEMDGAATAK                         | Label:13C(6)15N(2)(K)@13                                                                                          | 0.00142081         | 1282.6333   | 642.3239   | 1282.63184 | 642.323181 | 2          | 16 | 15.6519 | 9.70    |      |
| 8 | 43.77 | 47.77 | 39.1 | ODF2_FlexII   | 99.0 | NPPHCLFITPPSSEK                       | Propionamide(C)@5; Label:13C(6)15N(2)(K)@15                                                                       | 0.0023217          | 1726.84619  | 576.6227   | 1726.84399 | 576.621948 | 3          | 15 | 15.9829 | 9.70    |      |
| 8 | 43.77 | 47.77 | 39.1 | ODF2_FlexII   | 99.0 | NPPHCLFITPPSSEK                       | Propionamide(C)@5; Label:13C(6)15N(2)(K)@15                                                                       | 0.0023217          | 1726.84619  | 576.6227   | 1726.84399 | 576.621948 | 3          | 16 | 16.0005 | 9.70    |      |
| 8 | 43.77 | 47.77 | 39.1 | ODF2_FlexII   | 99.0 | NPPHCLFITPPSSEK                       | Deamidated(N)@1; Propionamide(C)@5; Label:13C(6)15N(2)(K)@15                                                      | 0.0422437          | 1727.87024  | 864.9424   | 1727.828   | 864.921265 | 2          | 11 | 16.0509 | 9.70    |      |
| 8 | 43.77 | 47.77 | 39.1 | ODF2_FlexII   | 99.0 | QMTCTDINTLTR                          | Propionamide(C)@4; Label:13C(6)15N(4)(R)@12                                                                       | 0.0134811          | 1476.70752  | 739.361    | 1476.69397 | 739.354309 | 2          | 14 | 16.5696 | 9.70    |      |
| 8 | 43.77 | 47.77 | 39.1 | ODF2_FlexII   | 99.0 | SSYANVFGDGYSTFLTSSPIR                 | Deamidated(N)@5; Label:13C(6)15N(4)(R)@22                                                                         | 0.0221486          | 2376.13745  | 1189.076   | 2376.11499 | 1189.0647  | 2          | 18 | 19.7604 | 9.70    |      |
| 8 | 43.77 | 47.77 | 39.1 | ODF2_FlexII   | 99.0 | TKNPPHCLFITPPSSEK                     | Label:13C(6)15N(2)(K)@2; Propionamide(C)@7; Label:13C(6)15N(2)(K)@17                                              | 0.00641295         | 1964.00696  | 655.6763   | 1964.00085 | 655.674194 | 3          | 18 | 15.3838 | 9.70    |      |
| 8 | 43.77 | 47.77 | 39.1 | ODF2_FlexII   | 99.0 | TRLADEVAAQLER                         | Label:13C(6)15N(4)(R)@2; Label:13C(6)15N(4)(R)@14                                                                 | 0.0108634          | 1619.84912  | 810.9318   | 1619.83814 | 810.926392 | 2          | 21 | 16.9608 | 9.70    |      |
| 8 | 43.77 | 47.77 | 39.1 | ODF2_FlexII   | 99.0 | TRLADEVAAQLER                         | Label:13C(6)15N(4)(R)@2; Deamidated(Q)@11; Label:13C(6)15N(4)(R)@14                                               | 0.0226463          | 1620.84485  | 541.2889   | 1620.82214 | 541.281372 | 3          | 11 | 16.9759 | 9.70    |      |
| 8 | 43.77 | 47.77 | 39.1 | ODF2_FlexII   | 99.0 | YPTFLYK                               | Label:13C(6)15N(2)(K)@7                                                                                           | cleaved A-Y@N-term | -0.00061447 | 938.498657 | 470.2566   | 938.499329 | 470.256928 | 2  | 9       | 17.7815 | 9.70 |
| 9 | 43.4  | 45.4  | 53.4 | FBXW2_FlexII  | 99.0 | DGLLCTGSDDLKSAK                       | Propionamide(C)@5; Label:13C(6)15N(2)(K)@14                                                                       | -0.0018416         | 1472.68884  | 737.3517   | 1472.6908  | 737.352661 | 2          | 16 | 17.055  | 87.11   |      |
| 9 | 43.4  | 45.4  | 53.4 | FBXW2_FlexII  | 99.0 | GHTGAVFSVDVNDLILVSGADFTVK             | Label:13C(6)15N(2)(K)@28                                                                                          | -0.00125511        | 2963.4292   | 988.817    | 2963.42798 | 988.816589 | 3          | 23 | 26.6278 | 87.11   |      |
| 9 | 43.4  | 45.4  | 53.4 | FBXW2_FlexII  | 99.0 | HLSNNLETLK                            | Label:13C(6)15N(2)(K)@11                                                                                          | 0.00010744         | 1288.72302  | 645.3688   | 1288.72302 | 645.368774 | 2          | 19 | 17.5869 | 87.11   |      |
| 9 | 43.4  | 45.4  | 53.4 | FBXW2_FlexII  | 99.0 | KDFETWLDNISVFTLSLTDLQK                | Label:13C(6)15N(2)(K)@1; Label:13C(6)15N(2)(K)@22                                                                 | 0.00220415         | 2628.36792  | 877.1299   | 2628.36572 | 877.129211 | 3          | 20 | 20.6857 | 87.11   |      |
| 9 | 43.4  | 45.4  | 53.4 | FBXW2_FlexII  | 99.0 | KDFETWLDNISVFTLSLTDLQKNETLDHLISGAVQLR | Label:13C(6)15N(2)(K)@1; Label:13C(6)15N(2)(K)@22; Label:13C(6)15N(4)(R)@39                                       | -0.00071811        | 4485.36377  | 898.08     | 4485.36426 | 898.080139 | 5          | 18 | 20.6985 | 87.11   |      |
| 9 | 43.4  | 45.4  | 53.4 | FBXW2_FlexII  | 99.0 | LLLELSFYLLK                           | Label:13C(6)15N(2)(K)@12                                                                                          | 0.00189804         | 1455.88513  | 728.9498   | 1455.88318 | 728.948914 | 2          | 12 | 20.6194 | 87.11   |      |
| 9 | 43.4  | 45.4  | 53.4 | FBXW2_FlexII  | 99.0 | LVTGSFDTNVTACVWSSGAR                  | Propionamide(C)@12; Label:13C(6)15N(4)(R)@20                                                                      | -0.00758433        | 2266.02783  | 756.3499   | 2266.03516 | 756.352356 | 3          | 22 | 18.9858 | 87.11   |      |
| 9 | 43.4  | 45.4  | 53.4 | FBXW2_FlexII  |      |                                       |                                                                                                                   |                    |             |            |            |            |            |    |         |         |      |

|   |      |      |                    |                                               |                                                                                                      |                               |             |            |          |            |            |   |    |         |       |
|---|------|------|--------------------|-----------------------------------------------|------------------------------------------------------------------------------------------------------|-------------------------------|-------------|------------|----------|------------|------------|---|----|---------|-------|
| 9 | 43.4 | 45.4 | 53.4 FBXW2_FlexIII | 99.0 VWALSAGTCLNTLTGHTIEWVTK                  | Propionamide(C) @9; Label: 13C(6)15N(2)(K) @22                                                       |                               | 0.00013423  | 2466.24536 | 1234.13  | 2466.24561 | 1234.13013 | 2 | 24 | 18.8665 | 87.11 |
| 9 | 43.4 | 45.4 | 53.4 FBXW2_FlexIII | 99.0 VYALYYK                                  | Label: 13C(6)15N(2)(K) @7                                                                            |                               | 0.00021629  | 926.499451 | 464.257  | 926.499329 | 464.256928 | 2 | 9  | 16.9036 | 87.11 |
| 9 | 43.4 | 45.4 | 53.4 FBXW2_FlexIII | 99.0 WPLPEYR                                  | Label: 13C(6)15N(4)(R) @7                                                                            |                               | 1.81E-05    | 969.494873 | 485.7547 | 969.494751 | 485.754669 | 2 | 9  | 17.9051 | 87.11 |
| 9 | 43.4 | 45.4 | 53.4 FBXW2_FlexIII | 99.0 YLYIMDLR                                 | Label: 13C(6)15N(4)(R) @8                                                                            |                               | -0.00738123 | 1095.55884 | 548.7867 | 1095.56616 | 548.790405 | 2 | 9  | 19.1452 | 87.11 |
| 9 | 43.4 | 45.4 | 53.4 FBXW2_FlexIII | 99.0 DGLLCTGSSDDLAK                           | Propionamide(C) @5; Label: 13C(6)15N(2)(K) @14                                                       |                               | -0.0018416  | 1472.68884 | 737.3517 | 1472.6908  | 737.352661 | 2 | 16 | 17.0576 | 87.11 |
| 9 | 43.4 | 45.4 | 53.4 FBXW2_FlexIII | 99.0 DGLLCTGSSDDLAK                           | Propionamide(C) @5; Label: 13C(6)15N(2)(K) @14                                                       |                               | -0.00110918 | 1472.6897  | 737.3521 | 1472.6908  | 737.352661 | 2 | 15 | 17.0854 | 87.11 |
| 9 | 43.4 | 45.4 | 53.4 FBXW2_FlexIII | 99.0 DGLLCTGSSDDLAK                           | Propionamide(C) @5; Label: 13C(6)15N(2)(K) @14                                                       |                               | -0.00049883 | 1472.69031 | 737.3524 | 1472.6908  | 737.352661 | 2 | 14 | 17.1231 | 87.11 |
| 9 | 43.4 | 45.4 | 53.4 FBXW2_FlexIII | 99.0 DGLLCTGSSDDLAK                           | Propionamide(C) @5; Label: 13C(6)15N(2)(K) @14                                                       |                               | -0.00013262 | 1472.69067 | 737.3526 | 1472.6908  | 737.352661 | 2 | 13 | 26.5844 | 87.11 |
| 9 | 43.4 | 45.4 | 53.4 FBXW2_FlexIII | 99.0 GHTGAVFSVDYNDELDILVSGSADFTVK             | Deamidated(N) @12; Label: 13C(6)15N(2)(K) @28                                                        |                               | 0.0162637   | 2964.42822 | 989.15   | 2964.41211 | 989.144592 | 3 | 18 | 20.0534 | 87.11 |
| 9 | 43.4 | 45.4 | 53.4 FBXW2_FlexIII | 99.0 GHTGAVFSVDYNDELDILVSGSADFTVK             | Deamidated(N) @12; Label: 13C(6)15N(2)(K) @28                                                        |                               | 0.0162637   | 2964.42822 | 989.15   | 2964.41211 | 989.144592 | 3 | 20 | 26.6126 | 87.11 |
| 9 | 43.4 | 45.4 | 53.4 FBXW2_FlexIII | 99.0 GHTGAVFSVDYNDELDILVSGSADFTVK             | Label: 13C(6)15N(2)(K) @28                                                                           |                               | 0.00125511  | 2963.4292  | 988.817  | 2963.42798 | 988.816589 | 3 | 23 | 26.6457 | 87.11 |
| 9 | 43.4 | 45.4 | 53.4 FBXW2_FlexIII | 99.0 GHTGAVFSVDYNDELDILVSGSADFTVK             | Deamidated(N) @12; Label: 13C(6)15N(2)(K) @28                                                        |                               | 0.0241749   | 2964.43604 | 989.1526 | 2964.41211 | 989.144592 | 3 | 13 | 26.6281 | 87.11 |
| 9 | 43.4 | 45.4 | 53.4 FBXW2_FlexIII | 99.0 HLSNNLETLTK                              | Label: 13C(6)15N(2)(K) @11                                                                           |                               | 0.00096193  | 1288.72412 | 645.3693 | 1288.72302 | 645.368774 | 2 | 19 | 17.602  | 87.11 |
| 9 | 43.4 | 45.4 | 53.4 FBXW2_FlexIII | 99.0 KDFETWLDNISVTFLSLTDLQK                   | Label: 13C(6)15N(2)(K) @1; Deamidated(N) @9; Label: 13C(6)15N(2)(K) @22                              | missed K-D @1                 | 0.00824052  | 2629.35815 | 877.46   | 2629.34985 | 877.457214 | 3 | 17 | 20.6629 | 87.11 |
| 9 | 43.4 | 45.4 | 53.4 FBXW2_FlexIII | 99.0 KDFETWLDNISVTFLSLTDLQK                   | Label: 13C(6)15N(2)(K) @1; Label: 13C(6)15N(2)(K) @22                                                | missed K-D @1                 | 0.00822592  | 2628.37427 | 877.132  | 2628.36572 | 877.129211 | 3 | 20 | 20.7032 | 87.11 |
| 9 | 43.4 | 45.4 | 53.4 FBXW2_FlexIII | 99.0 KDFETWLDNISVTFLSLTDLQK                   | Label: 13C(6)15N(2)(K) @1; Deamidated(N) @9; Label: 13C(6)15N(2)(K) @22                              | missed K-D @1                 | 0.0142679   | 2629.36401 | 877.462  | 2629.34985 | 877.457214 | 3 | 16 | 20.7006 | 87.11 |
| 9 | 43.4 | 45.4 | 53.4 FBXW2_FlexIII | 99.0 KDFETWLDNISVTFLSLTDLQKNETLDHLISLGSAGVQLR | Label: 13C(6)15N(2)(K) @1; Label: 13C(6)15N(2)(K) @22; Deamidated(N) @23; Label: 13C(6)15N(4)(R) @39 | missed K-D @1; missed K-N @22 | 0.023026    | 4486.37061 | 1122.6   | 4486.34815 | 1122.59436 | 4 | 17 | 20.6501 | 87.11 |
| 9 | 43.4 | 45.4 | 53.4 FBXW2_FlexIII | 99.0 KDFETWLDNISVTFLSLTDLQKNETLDHLISLGSAGVQLR | Label: 13C(6)15N(2)(K) @1; Label: 13C(6)15N(2)(K) @22; Deamidated(N) @23; Label: 13C(6)15N(4)(R) @39 | missed K-D @1; missed K-N @22 | 0.015328    | 4486.36377 | 898.28   | 4486.34815 | 898.276917 | 5 | 19 | 20.668  | 87.11 |
| 9 | 43.4 | 45.4 | 53.4 FBXW2_FlexIII | 99.0 KDFETWLDNISVTFLSLTDLQKNETLDHLISLGSAGVQLR | Label: 13C(6)15N(2)(K) @1; Label: 13C(6)15N(2)(K) @22; Label: 13C(6)15N(4)(R) @39                    | missed K-D @1; missed K-N @22 | 0.00704089  | 4485.37061 | 1122.35  | 4485.36426 | 1122.34827 | 4 | 18 | 20.6755 | 87.11 |
| 9 | 43.4 | 45.4 | 53.4 FBXW2_FlexIII | 99.0 LVTGSPDNTVACWEWSSGAR                     | Propionamide(C) @12; Label: 13C(6)15N(4)(R) @20                                                      |                               | 0.00340954  | 2266.03931 | 1134.027 | 2266.03516 | 1134.0249  | 2 | 28 | 18.9451 | 87.11 |
| 9 | 43.4 | 45.4 | 53.4 FBXW2_FlexIII | 99.0 LVTGSPDNTVACWEWSSGAR                     | Propionamide(C) @12; Label: 13C(6)15N(4)(R) @20                                                      |                               | 0.00340954  | 2266.03931 | 1134.027 | 2266.03516 | 1134.0249  | 2 | 27 | 18.9476 | 87.11 |
| 9 | 43.4 | 45.4 | 53.4 FBXW2_FlexIII | 99.0 LVTGSPDNTVACWEWSSGAR                     | Propionamide(C) @12; Label: 13C(6)15N(4)(R) @20                                                      |                               | 0.00340954  | 2266.03931 | 1134.027 | 2266.03516 | 1134.0249  | 2 | 26 | 18.9704 | 87.11 |
| 9 | 43.4 | 45.4 | 53.4 FBXW2_FlexIII | 99.0 LVTGSPDNTVACWEWSSGAR                     | Propionamide(C) @12; Label: 13C(6)15N(4)(R) @20                                                      |                               | 0.00267712  | 2266.03735 | 1134.026 | 2266.03516 | 1134.0249  | 2 | 23 | 18.9781 | 87.11 |
| 9 | 43.4 | 45.4 | 53.4 FBXW2_FlexIII | 99.0 LVTGSPDNTVACWEWSSGAR                     | Deamidated(N) @8; Propionamide(C) @12; Label: 13C(6)15N(4)(R) @20                                    |                               | 0.0284814   | 2267.04785 | 756.6899 | 2267.01929 | 756.680359 | 3 | 15 | 19.0061 | 87.11 |
| 9 | 43.4 | 45.4 | 53.4 FBXW2_FlexIII | 99.0 LVTGSPDNTVACWEWSSGAR                     | Propionamide(C) @12; Label: 13C(6)15N(4)(R) @20                                                      |                               | 0.0104896   | 2266.04541 | 1134.03  | 2266.03516 | 1134.0249  | 2 | 13 | 26.5147 | 87.11 |
| 9 | 43.4 | 45.4 | 53.4 FBXW2_FlexIII | 99.0 LVTGSPDNTVACWEWSSGAR                     | Deamidated(N) @8; Propionamide(C) @12; Label: 13C(6)15N(4)(R) @20                                    |                               | 0.0264747   | 2267.04541 | 1134.53  | 2267.01929 | 1134.51685 | 2 | 12 | 26.5173 | 87.11 |
| 9 | 43.4 | 45.4 | 53.4 FBXW2_FlexIII | 99.0 MKQLEDHEAFETSSLIGHSAR                    | Label: 13C(6)15N(2)(K) @2; Deamidated(Q) @3; Label: 13C(6)15N(4)(R) @21                              | missed K-Q @2                 | 0.0250366   | 2404.16968 | 602.0497 | 2404.14478 | 602.043457 | 4 | 12 | 16.3582 | 87.11 |
| 9 | 43.4 | 45.4 | 53.4 FBXW2_FlexIII | 99.0 NETLDHLISLGSAGVQLR                       | Label: 13C(6)15N(4)(R) @17                                                                           |                               | 0.00128835  | 1875.01025 | 626.0107 | 1875.00891 | 626.010254 | 3 | 20 | 18.8892 | 87.11 |
| 9 | 43.4 | 45.4 | 53.4 FBXW2_FlexIII | 99.0 NETLDHLISLGSAGVQLR                       | Label: 13C(6)15N(4)(R) @17                                                                           |                               | 0.00128835  | 1875.01025 | 626.0107 | 1875.00891 | 626.010254 | 3 | 21 | 18.8994 | 87.11 |
| 9 | 43.4 | 45.4 | 53.4 FBXW2_FlexIII | 99.0 NETLDHLISLGSAGVQLR                       | Label: 13C(6)15N(4)(R) @17                                                                           |                               | 0.0006245   | 1875.00964 | 938.5121 | 1875.00891 | 938.511719 | 2 | 28 | 18.9145 | 87.11 |
| 9 | 43.4 | 45.4 | 53.4 FBXW2_FlexIII | 99.0 NETLDHLISLGSAGVQLR                       | Label: 13C(6)15N(4)(R) @17                                                                           |                               | 0.00147146  | 1875.01025 | 626.0107 | 1875.00891 | 626.010254 | 3 | 21 | 18.9222 | 87.11 |
| 9 | 43.4 | 45.4 | 53.4 FBXW2_FlexIII | 99.0 NETLDHLISLGSAGVQLR                       | Label: 13C(6)15N(4)(R) @17                                                                           |                               | 0.0006245   | 1875.00964 | 938.5121 | 1875.00891 | 938.511719 | 2 | 29 | 18.9247 | 87.11 |
| 9 | 43.4 | 45.4 | 53.4 FBXW2_FlexIII | 99.0 NETLDHLISLGSAGVQLR                       | Label: 13C(6)15N(4)(R) @17                                                                           |                               | 0.00269969  | 1875.01172 | 938.5131 | 1875.00891 | 938.511719 | 2 | 27 | 18.9502 | 87.11 |
| 9 | 43.4 | 45.4 | 53.4 FBXW2_FlexIII | 99.0 NETLDHLISLGSAGVQLR                       | Label: 13C(6)15N(4)(R) @17                                                                           |                               | 0.00092214  | 1875.01001 | 626.0106 | 1875.00891 | 626.010254 | 3 | 21 | 18.9604 | 87.11 |
| 9 | 43.4 | 45.4 | 53.4 FBXW2_FlexIII | 99.0 NETLDHLISLGSAGVQLR                       | Label: 13C(6)15N(4)(R) @17                                                                           |                               | 0.00160106  | 1875.01062 | 938.5126 | 1875.00891 | 938.511719 | 2 | 24 | 18.9909 | 87.11 |
| 9 | 43.4 | 45.4 | 53.4 FBXW2_FlexIII | 99.0 NETLDHLISLGSAGVQLR                       | Label: 13C(6)15N(4)(R) @17                                                                           |                               | 0.00092214  | 1875.01001 | 626.0106 | 1875.00891 | 626.010254 | 3 | 19 | 26.6227 | 87.11 |
| 9 | 43.4 | 45.4 | 53.4 FBXW2_FlexIII | 99.0 NETLDHLISLGSAGVQLR                       | Label: 13C(6)15N(4)(R) @17                                                                           |                               | 0.00092214  | 1875.01001 | 626.0106 | 1875.00891 | 626.010254 | 3 | 18 | 26.6253 | 87.11 |
| 9 | 43.4 | 45.4 | 53.4 FBXW2_FlexIII | 99.0 NLGWQIDDSVQDALHWK                        | Deamidated(Q) @5; Label: 13C(6)15N(2)(K) @17                                                         |                               | 0.0141101   | 2032.98755 | 678.6698 | 2032.97339 | 678.6651   | 3 | 16 | 19.3381 | 87.11 |
| 9 | 43.4 | 45.4 | 53.4 FBXW2_FlexIII | 99.0 NLGWQIDDSVQDALHWK                        | Label: 13C(6)15N(2)(K) @17                                                                           |                               | -0.0100537  | 2031.97925 | 678.3337 | 2031.98938 | 678.337097 | 3 | 18 | 19.3406 | 87.11 |
| 9 | 43.4 | 45.4 | 53.4 FBXW2_FlexIII | 99.0 NLGWQIDDSVQDALHWK                        | Label: 13C(6)15N(2)(K) @17                                                                           |                               | -0.00388163 | 2031.98547 | 1017     | 2031.98938 | 1017.00195 | 2 | 20 | 19.3482 | 87.11 |
| 9 | 43.4 | 45.4 | 53.4 FBXW2_FlexIII | 99.0 NLGWQIDDSVQDALHWK                        | Deamidated(Q) @5; Label: 13C(6)15N(2)(K) @17                                                         |                               | 0.0121035   | 2032.98547 | 1017.5   | 2032.97339 | 1017.49396 | 2 | 20 | 19.3508 | 87.11 |
| 9 | 43.4 | 45.4 | 53.4 FBXW2_FlexIII | 99.0 NLGWQIDDSVQDALHWK                        | Label: 13C(6)15N(2)(K) @17                                                                           |                               | -0.00675782 | 2031.98254 | 678.3348 | 2031.98938 | 678.337097 | 3 | 18 | 19.3735 | 87.11 |
| 9 | 43.4 | 45.4 | 53.4 FBXW2_FlexIII | 99.0 NLGWQIDDSVQDALHWK                        | Label: 13C(6)15N(2)(K) @17                                                                           |                               | -0.00644511 | 2031.98352 | 1016.999 | 2031.98938 | 1017.00195 | 2 | 21 | 19.3786 | 87.11 |
| 9 | 43.4 | 45.4 | 53.4 FBXW2_FlexIII | 99.0 NLGWQIDDSVQDALHWK                        | Label: 13C(6)15N(2)(K) @17                                                                           |                               | -0.00351542 | 2031.98547 | 1017     | 2031.98938 | 1017.00195 | 2 | 18 | 19.4293 | 87.11 |
| 9 | 43.4 | 45.4 | 53.4 FBXW2_FlexIII | 99.0 NLGWQIDDSVQDALHWK                        | Label: 13C(6)15N(2)(K) @17                                                                           |                               | -0.00749024 | 2031.98193 | 678.3346 | 2031.98938 | 678.337097 | 3 | 15 | 19.4369 | 87.11 |
| 9 | 43.4 | 45.4 | 53.4 FBXW2_FlexIII | 99.0 NLGWQIDDSVQDALHWK                        | Label: 13C(6)15N(2)(K) @17                                                                           |                               | -0.00053223 | 2031.98889 | 678.3369 | 2031.98938 | 678.337097 | 3 | 18 | 26.6177 | 87.11 |
| 9 | 43.4 | 45.4 | 53.4 FBXW2_FlexIII | 99.0 NLGWQIDDSVQDALHWK                        | Label: 13C(6)15N(2)(K) @17                                                                           |                               | -0.00053223 | 2031.98889 | 678.3369 | 2031.98938 | 678.337097 | 3 | 15 | 26.6202 | 87.11 |
| 9 | 43.4 | 45.4 | 53.4 FBXW2_FlexIII | 99.0 NLGWQIDDSVQDALHWK                        | Label: 13C(6)15N(2)(K) @17                                                                           |                               | -0.00053223 | 2031.98889 | 678.3369 | 2031.98938 | 678.337097 | 3 | 17 | 26.6304 | 87.11 |
| 9 | 43.4 | 45.4 | 53.4 FBXW2_FlexIII | 99.0 NLGWQIDDSVQDALHWK                        | Label: 13C(6)15N(2)(K) @17                                                                           |                               | -0.00683584 | 2031.98254 | 678.3348 | 2031.98938 | 678.337097 | 3 | 16 | 19.4102 | 87.11 |
| 9 | 43.4 | 45.4 | 53.4 FBXW2_FlexIII | 99.0 QLEDHEAFETSSLIGHSAR                      | Label: 13C(6)15N(4)(R) @19                                                                           |                               | -0.00346449 | 2136.00757 | 713.0098 | 2136.01123 | 713.010986 | 3 | 25 | 16.5179 | 87.11 |
| 9 | 43.4 | 45.4 | 53.4 FBXW2_FlexIII | 99.0 QLEDHEAFETSSLIGHSAR                      | Deamidated(Q) @1; Label: 13C(6)15N(4)(R) @19                                                         |                               | 0.0324181   | 2137.02759 | 713.3498 | 2136.99512 | 713.338989 | 3 | 13 | 16.5229 | 87.11 |
| 9 | 43.4 | 45.4 | 53.4 FBXW2_FlexIII | 99.0 QLEDHEAFETSSLIGHSAR                      | Label: 13C(6)15N(4)(R) @19                                                                           |                               | -0.00016859 | 2136.01099 | 713.0109 | 2136.01123 | 713.010986 | 3 | 21 | 16.6204 | 87.11 |
| 9 | 43.4 | 45.4 | 53.4 FBXW2_FlexIII | 99.0 QLEDHEAFETSSLIGHSAR                      | Gln->pyro-Glu @N-term; Label: 13C(6)15N(4)(R) @19                                                    |                               | 0.00250412  | 2118.98706 | 707.3363 | 2118.98462 | 707.335449 | 3 | 24 | 17.509  | 87.11 |
| 9 | 43.4 | 45.4 | 53.4 FBXW2_FlexIII | 99.0 QLEDHEAFETSSLIGHSAR                      | Gln->pyro-Glu @N-term; Label: 13C(6)15N(4)(R) @19                                                    |                               | 0.00250412  | 2118.98706 | 707.3363 | 2118.98462 | 707.335449 | 3 | 24 | 17.5113 | 87.11 |
| 9 | 43.4 | 45.4 | 53.4 FBXW2_FlexIII | 99.0 QLEDHEAFETSSLIGHSAR                      | Gln->pyro-Glu @N-term; Label: 13C(6)15N(4)(R) @19                                                    |                               | 0.00250412  | 2118.98706 | 707.3363 | 2118.98462 | 707.335449 | 3 | 24 | 17.5136 | 87.11 |
| 9 | 43.4 | 45.4 | 53.4 FBXW2_FlexIII | 99.0 QLEDHEAFETSSLIGHSAR                      | Gln->pyro-Glu @N-term; Label: 13C(6)15N(4)(R) @19                                                    |                               | 0.00250412  | 2118.98706 | 707.3363 | 2118.98462 | 707.335449 | 3 | 23 | 17.5212 | 87.11 |
| 9 | 43.4 | 45.4 | 53.4 FBXW2_FlexIII | 99.0 QLEDHEAFETSSLIGHSAR                      | Gln->pyro-Glu @N-term; Label: 13C(6)15N(4)(R) @19                                                    |                               | 0.00250412  | 2118.98706 | 707.3363 | 2118.98462 | 707.335449 | 3 | 19 | 17.5363 | 87.11 |
| 9 | 43.4 | 45.4 | 53.4 FBXW2_FlexIII | 99.0 QLEDHEAFETSSLIGHSAR                      | Gln->pyro-Glu @N-term; Label: 13C(6)15N(4)(R) @19                                                    |                               | 0.00098578  | 2118.98535 | 1060.5   | 2118.98462 | 1060.49951 | 2 | 26 | 17.5414 | 87.11 |
| 9 | 43.4 | 45.4 | 53.4 FBXW2_FlexIII | 99.0 QLEDHEAFETSSLIGHSAR                      | Gln->pyro-Glu @N-term; Label: 13C(6)15N(4)(R) @19                                                    |                               | 0.00250412  | 2118.98706 | 707.3363 | 2118.98462 | 7          |   |    |         |       |

|    |      |       |      |               |      |                                          |                                                                                            |                    |             |            |            |            |            |    |         |         |       |
|----|------|-------|------|---------------|------|------------------------------------------|--------------------------------------------------------------------------------------------|--------------------|-------------|------------|------------|------------|------------|----|---------|---------|-------|
| 9  | 43.4 | 45.4  | 53.4 | FBXW2_FlexIII | 99.0 | SLHSPGDIYLLSADKYEIK                      | Label: 13C(6)15N(2)(K)@16; Label: 13C(6)15N(2)(K)@20                                       | missed K-Y@16      | -0.00124847 | 2277.22144 | 570.3126   | 2277.22266 | 570.312988 | 4  | 18      | 18.517  | 87.11 |
| 9  | 43.4 | 45.4  | 53.4 | FBXW2_FlexIII | 99.0 | TESLSUR                                  | Label: 13C(6)15N(4)(R)@7                                                                   |                    | 0.0022941   | 814.444702 | 408.2296   | 814.44283  | 408.228485 | 2  | 9       | 15.3784 | 87.11 |
| 9  | 43.4 | 45.4  | 53.4 | FBXW2_FlexIII | 99.0 | TLSVSEDR                                 | Label: 13C(6)15N(4)(R)@8                                                                   |                    | -0.00093415 | 915.452698 | 458.7336   | 915.453674 | 458.734131 | 2  | 9       | 14.5615 | 87.11 |
| 9  | 43.4 | 45.4  | 53.4 | FBXW2_FlexIII | 99.0 | VISACTEVWQTACK                           | Propionamide(C)@5; Propionamide(C)@13; Label: 13C(6)15N(2)(K)@14                           |                    | 0.00150211  | 1687.8169  | 844.9157   | 1687.81531 | 844.914917 | 2  | 17      | 17.2667 | 87.11 |
| 9  | 43.4 | 45.4  | 53.4 | FBXW2_FlexIII | 99.0 | VISACTEVWQTACK                           | Propionamide(C)@5; Propionamide(C)@13; Label: 13C(6)15N(2)(K)@14                           |                    | 0.00150211  | 1687.8169  | 844.9157   | 1687.81531 | 844.914917 | 2  | 17      | 17.2743 | 87.11 |
| 9  | 43.4 | 45.4  | 53.4 | FBXW2_FlexIII | 99.0 | VISACTEVWQTACK                           | Propionamide(C)@5; Propionamide(C)@13; Label: 13C(6)15N(2)(K)@14                           |                    | 0.00101383  | 1687.81653 | 844.9155   | 1687.81531 | 844.914917 | 2  | 17      | 17.297  | 87.11 |
| 9  | 43.4 | 45.4  | 53.4 | FBXW2_FlexIII | 99.0 | VISACTEVWQTACK                           | Propionamide(C)@5; Propionamide(C)@13; Label: 13C(6)15N(2)(K)@14                           |                    | 0.0011359   | 1687.81653 | 844.9155   | 1687.81531 | 844.914917 | 2  | 15      | 17.3855 | 87.11 |
| 9  | 43.4 | 45.4  | 53.4 | FBXW2_FlexIII | 99.0 | VWALSAGTCLNTLTGHTIEWVTK                  | Propionamide(C)@9; Deamidated(N)@11; Label: 13C(6)15N(2)(K)@22                             |                    | 0.00811619  | 2467.23804 | 823.4199   | 2467.22974 | 823.417175 | 3  | 14      | 18.7929 | 87.11 |
| 9  | 43.4 | 45.4  | 53.4 | FBXW2_FlexIII | 99.0 | VWALSAGTCLNTLTGHTIEWVTK                  | Propionamide(C)@9; Label: 13C(6)15N(2)(K)@22                                               |                    | 0.00226293  | 2466.2478  | 823.0899   | 2466.24561 | 823.089172 | 3  | 23      | 18.8056 | 87.11 |
| 9  | 43.4 | 45.4  | 53.4 | FBXW2_FlexIII | 99.0 | VWALSAGTCLNTLTGHTIEWVTK                  | Propionamide(C)@9; Label: 13C(6)15N(2)(K)@22                                               |                    | 0.00244603  | 2466.24829 | 823.09     | 2466.24561 | 823.089172 | 3  | 19      | 18.8233 | 87.11 |
| 9  | 43.4 | 45.4  | 53.4 | FBXW2_FlexIII | 99.0 | VWALSAGTCLNTLTGHTIEWVTK                  | Propionamide(C)@9; Label: 13C(6)15N(2)(K)@22                                               |                    | 0.00226293  | 2466.2478  | 823.0899   | 2466.24561 | 823.089172 | 3  | 17      | 18.8562 | 87.11 |
| 9  | 43.4 | 45.4  | 53.4 | FBXW2_FlexIII | 99.0 | VWALSAGTCLNTLTGHTIEWVTK                  | Propionamide(C)@9; Deamidated(N)@11; Label: 13C(6)15N(2)(K)@22                             |                    | 0.0161193   | 2467.24536 | 1234.63    | 2467.22974 | 1234.62207 | 2  | 19      | 18.8639 | 87.11 |
| 9  | 43.4 | 45.4  | 53.4 | FBXW2_FlexIII | 99.0 | VWALSAGTCLNTLTGHTIEWVTK                  | Propionamide(C)@9; Label: 13C(6)15N(2)(K)@22                                               |                    | 0.00226293  | 2466.2478  | 823.0899   | 2466.24561 | 823.089172 | 3  | 14      | 18.8867 | 87.11 |
| 9  | 43.4 | 45.4  | 53.4 | FBXW2_FlexIII | 99.0 | VWALSAGTCLNTLTGHTIEWVTK                  | Propionamide(C)@9; Label: 13C(6)15N(2)(K)@22                                               |                    | 0.00226293  | 2466.2478  | 823.0899   | 2466.24561 | 823.089172 | 3  | 13      | 26.5869 | 87.11 |
| 9  | 43.4 | 45.4  | 53.4 | FBXW2_FlexIII | 99.0 | VWALSAGTCLNTLTGHTIEWVTK                  | Propionamide(C)@9; Deamidated(N)@11; Label: 13C(6)15N(2)(K)@22                             |                    | 0.0381455   | 2467.26782 | 823.4299   | 2467.22974 | 823.417175 | 3  | 15      | 26.5895 | 87.11 |
| 9  | 43.4 | 45.4  | 53.4 | FBXW2_FlexIII | 99.0 | YLYIMDLR                                 | Label: 13C(6)15N(4)(R)@8                                                                   |                    | -0.00701502 | 1095.55933 | 548.7869   | 1095.56616 | 548.790405 | 2  | 9       | 19.0665 | 87.11 |
| 9  | 43.4 | 45.4  | 53.4 | FBXW2_FlexIII | 99.0 | YLYIMDLR                                 | Label: 13C(6)15N(4)(R)@8                                                                   |                    | -0.00701502 | 1095.55933 | 548.7869   | 1095.56616 | 548.790405 | 2  | 9       | 19.0792 | 87.11 |
| 9  | 43.4 | 45.4  | 53.4 | FBXW2_FlexIII | 99.0 | YPTFLYK                                  | Label: 13C(6)15N(2)(K)@7                                                                   | cleaved G-Y@N-term | -0.00061447 | 938.498657 | 470.2566   | 938.499329 | 470.256928 | 2  | 9       | 17.7815 | 87.11 |
| 10 | 42.4 | 44.59 | 60.6 | GPC4_FlexIII  | 99.0 | FDEFFKELLENAEK                           | Label: 13C(6)15N(2)(K)@6; Label: 13C(6)15N(2)(K)@14                                        | missed K-E@6       | -0.012146   | 1773.86743 | 887.941    | 1773.87964 | 887.947083 | 2  | 19      | 19.7803 | 84.97 |
| 10 | 42.4 | 44.59 | 60.6 | GPC4_FlexIII  | 99.0 | FRPHHPEERPTTAAGTSLDR                     | Label: 13C(6)15N(4)(R)@2; Label: 13C(6)15N(4)(R)@9; Label: 13C(6)15N(4)(R)@20              |                    | -0.0193663  | 2304.13086 | 577.04     | 2304.15015 | 577.0448   | 4  | 13      | 13.8693 | 84.97 |
| 10 | 42.4 | 44.59 | 60.6 | GPC4_FlexIII  | 99.0 | GFNKNDAPLHEINGDHLK                       | Label: 13C(6)15N(2)(K)@4; Label: 13C(6)15N(2)(K)@18                                        | missed K-N@4       | -0.0153164  | 2034.01013 | 509.5098   | 2034.02539 | 509.513611 | 4  | 15      | 15.6428 | 84.97 |
| 10 | 42.4 | 44.59 | 60.6 | GPC4_FlexIII  | 99.0 | GLVTVPKPCNYCNSNIMR                       | Label: 13C(6)15N(2)(K)@6; Propionamide(C)@8; Propionamide(C)@12; Label: 13C(6)15N(4)(R)@17 |                    | 0.00231361  | 2120.03589 | 707.6859   | 2120.03369 | 707.68512  | 3  | 20      | 17.2226 | 84.97 |
| 10 | 42.4 | 44.59 | 60.6 | GPC4_FlexIII  | 99.0 | ICPOGSTCCSQEMEEK                         | Propionamide(C)@2; Propionamide(C)@8; Propionamide(C)@9; Label: 13C(6)15N(2)(K)@16         |                    | -7.20E-05   | 1992.81409 | 665.2786   | 1992.81409 | 665.278626 | 3  | 19      | 14.8928 | 84.97 |
| 10 | 42.4 | 44.59 | 60.6 | GPC4_FlexIII  | 99.0 | ISDAIMMQDINSVQSQK                        | Label: 13C(6)15N(2)(K)@18                                                                  |                    | -0.00097504 | 2014.95337 | 672.6584   | 2014.95435 | 672.658691 | 3  | 22      | 17.1217 | 84.97 |
| 10 | 42.4 | 44.59 | 60.6 | GPC4_FlexIII  | 99.0 | LEGFNFIESVMDPIDVK                        | Propionamide(C)@15; Label: 13C(6)15N(2)(K)@18                                              |                    | -0.00114265 | 1901.94324 | 951.9789   | 1901.94446 | 951.979492 | 2  | 15      | 20.1767 | 84.97 |
| 10 | 42.4 | 44.59 | 60.6 | GPC4_FlexIII  | 99.0 | LVNSQYHFTDEYLECVSK                       | Propionamide(C)@11; Label: 13C(6)15N(2)(K)@15                                              |                    | 0.00205325  | 2253.05225 | 752.0247   | 2253.05029 | 752.024048 | 3  | 17      | 17.6395 | 84.97 |
| 10 | 42.4 | 44.59 | 60.6 | GPC4_FlexIII  | 99.0 | MAAGNGNEDDCCVWNGK                        | Propionamide(C)@4; Propionamide(C)@7; Label: 13C(6)15N(4)(R)@8                             |                    | -0.00257416 | 1659.6471  | 830.8308   | 1659.64966 | 830.832153 | 2  | 21      | 15.2012 | 84.97 |
| 10 | 42.4 | 44.59 | 60.6 | GPC4_FlexIII  | 99.0 | MYCSHCR                                  | Deamidated(N)@6; Propionamide(C)@26; Propionamide(C)@31; Label: 13C(6)15N(2)(K)@45         |                    | -1.04E-05   | 1163.49133 | 582.7529   | 1163.49133 | 582.75293  | 2  | 11      | 14.0597 | 84.97 |
| 10 | 42.4 | 44.59 | 60.6 | GPC4_FlexIII  | 99.0 | NAYNGNDVFFDISDESSGEGSGGEYQOCPEFDYNATHAGK | Label: 13C(6)15N(2)(K)@14                                                                  |                    | 0.0229657   | 4976.77852 | 1245.252   | 4976.95654 | 1245.24646 | 4  | 22      | 18.4585 | 84.97 |
| 10 | 42.4 | 44.59 | 60.6 | GPC4_FlexIII  | 99.0 | NADAPLHEINGDHLK                          | Label: 13C(6)15N(4)(R)@10                                                                  |                    | 0.00163599  | 1579.78503 | 790.8998   | 1579.78345 | 790.898987 | 2  | 19      | 15.39   | 84.97 |
| 10 | 42.4 | 44.59 | 60.6 | GPC4_FlexIII  | 99.0 | SISESAFSAR                               | Label: 13C(6)15N(2)(K)@8                                                                   |                    | 0.00040119  | 1063.51782 | 532.7662   | 1063.51733 | 532.76593  | 2  | 11      | 16.0938 | 84.97 |
| 10 | 42.4 | 44.59 | 60.6 | GPC4_FlexIII  | 99.0 | SLNDMPVK                                 | Propionamide(C)@7; Label: 13C(6)15N(4)(R)@17                                               |                    | 0.0018298   | 960.484863 | 481.2497   | 960.483032 | 481.248779 | 2  | 10      | 17.5894 | 84.97 |
| 10 | 42.4 | 44.59 | 60.6 | GPC4_FlexIII  | 99.0 | SVVSEQCNNLQAVFASR                        |                                                                                            | 3.88E-05           | 1954.95569  | 652.6592   | 1954.95581 | 652.659241 | 3          | 14 | 26.7237 | 84.97   |       |
| 10 | 42.4 | 44.59 | 60.6 | GPC4_FlexIII  | 99.0 | TAQGLAVAGDVVSK                           |                                                                                            | 0.00095172         | 1461.78369  | 731.8991   | 1461.78272 | 731.898621 | 2          | 18 | 18.1078 | 84.97   |       |
| 10 | 42.4 | 44.59 | 60.6 | GPC4_FlexIII  | 99.0 | VFOGCGPPKPLPAGR                          | Propionamide(C)@5; Label: 13C(6)15N(2)(K)@9; Label: 13C(6)15N(4)(R)@15                     |                    | -0.00138842 | 1611.86621 | 538.296    | 1611.86743 | 538.296448 | 3  | 14      | 15.6178 | 84.97 |
| 10 | 42.4 | 44.59 | 60.6 | GPC4_FlexIII  | 99.0 | VSVVNPATQCTHALLK                         | Propionamide(C)@10; Label: 13C(6)15N(2)(K)@16                                              |                    | -0.0158888  | 1758.9386  | 587.3201   | 1758.95422 | 587.325317 | 3  | 15      | 26.6497 | 84.97 |
| 10 | 42.4 | 44.59 | 60.6 | GPC4_FlexIII  | 99.0 | YLFATVGNGLANGNNPEVQDTSKPDILILR           | Label: 13C(6)15N(2)(K)@25; Label: 13C(6)15N(4)(R)@32                                       |                    | -0.0236991  | 3473.8042  | 1158.942   | 3473.82739 | 1158.94971 | 3  | 23      | 19.1538 | 84.97 |
| 10 | 42.4 | 44.59 | 60.6 | GPC4_FlexIII  | 99.0 | YTEQLKPFGDVPR                            | Label: 13C(6)15N(2)(K)@6; Label: 13C(6)15N(4)(R)@13                                        |                    | 0.00149409  | 1566.81763 | 784.4161   | 1566.81616 | 784.415344 | 2  | 16      | 16.8824 | 84.97 |
| 10 | 42.4 | 44.59 | 60.6 | GPC4_FlexIII  | 99.0 | FDEFFKELLENAEK                           | Label: 13C(6)15N(2)(K)@6; Label: 13C(6)15N(2)(K)@14                                        | missed K-E@6       | -0.00132578 | 1773.87817 | 592.3      | 1773.87964 | 592.300476 | 3  | 15      | 18.9538 | 84.97 |
| 10 | 42.4 | 44.59 | 60.6 | GPC4_FlexIII  | 99.0 | FRPHHPEERPTTAAGTSLDR                     | Label: 13C(6)15N(4)(R)@2; Label: 13C(6)15N(4)(R)@9; Label: 13C(6)15N(4)(R)@20              |                    | 0.00985263  | 2304.15991 | 769.0606   | 2304.15015 | 769.057312 | 3  | 13      | 13.9475 | 84.97 |
| 10 | 42.4 | 44.59 | 60.6 | GPC4_FlexIII  | 99.0 | GFNKNDAPLHEINGDHLK                       | Label: 13C(6)15N(2)(K)@4; Deamidated(N)@13; Label: 13C(6)15N(2)(K)@18                      | missed K-N@4       | 0.00067128  | 2035.01013 | 509.7598   | 2035.0094  | 509.759613 | 4  | 15      | 15.7207 | 84.97 |
| 10 | 42.4 | 44.59 | 60.6 | GPC4_FlexIII  | 99.0 | GFNKNDAPLHEINGDHLK                       | Label: 13C(6)15N(2)(K)@4; Deamidated(N)@13; Label: 13C(6)15N(2)(K)@18                      | missed K-N@4       | -0.00054943 | 2035.00891 | 509.7595   | 2035.0094  | 509.759613 | 4  | 14      | 15.766  | 84.97 |
| 10 | 42.4 | 44.59 | 60.6 | GPC4_FlexIII  | 99.0 | GLVTVPKPCNYCNSNIMR                       | Label: 13C(6)15N(2)(K)@6; Propionamide(C)@8; Propionamide(C)@12; Label: 13C(6)15N(4)(R)@17 |                    | 0.00231361  | 2120.03589 | 707.6859   | 2120.03369 | 707.68512  | 3  | 21      | 17.2201 | 84.97 |
| 10 | 42.4 | 44.59 | 60.6 | GPC4_FlexIII  | 99.0 | ICPOGSTCCSQEMEEK                         | Propionamide(C)@2; Propionamide(C)@8; Propionamide(C)@9; Label: 13C(6)15N(2)(K)@16         |                    | 0.00332901  | 1992.81751 | 997.416    | 1992.81409 | 997.414307 | 2  | 19      | 14.7802 | 84.97 |
| 10 | 42.4 | 44.59 | 60.6 | GPC4_FlexIII  | 99.0 | ICPOGSTCCSQEMEEK                         | Propionamide(C)@2; Propionamide(C)@8; Propionamide(C)@9; Label: 13C(6)15N(2)(K)@16         |                    | 0.00332901  | 1992.81751 | 997.416    | 1992.81409 | 997.414307 | 2  | 17      | 14.7853 | 84.97 |
| 10 | 42.4 | 44.59 | 60.6 | GPC4_FlexIII  | 99.0 | ICPOGSTCCSQEMEEK                         | Propionamide(C)@2; Propionamide(C)@8; Propionamide(C)@9; Label: 13C(6)15N(2)(K)@16         |                    | 0.00332901  | 1992.81751 | 997.416    | 1992.81409 | 997.414307 | 2  | 17      | 14.8004 | 84.97 |
| 10 | 42.4 | 44.59 | 60.6 | GPC4_FlexIII  | 99.0 | ICPOGSTCCSQEMEEK                         | Propionamide(C)@2; Propionamide(C)@8; Propionamide(C)@9; Label: 13C(6)15N(2)(K)@16         |                    | 0.0029628   | 1992.81702 | 997.4158   | 1992.81409 | 997.414307 | 2  | 15      | 14.8106 | 84.97 |
| 10 | 42.4 | 44.59 | 60.6 | GPC4_FlexIII  | 99.0 | ICPOGSTCCSQEMEEK                         | Propionamide(C)@2; Propionamide(C)@8; Propionamide(C)@9; Label: 13C(6)15N(2)(K)@16         |                    | 0.00084356  | 1992.81482 | 665.2789   | 1992.81409 | 665.278626 | 3  | 21      | 14.8457 | 84.97 |
| 10 | 42.4 | 44.59 | 60.6 | GPC4_FlexIII  | 99.0 | ICPOGSTCCSQEMEEK                         | Propionamide(C)@2; Propionamide(C)@8; Propionamide(C)@9; Label: 13C(6)15N(2)(K)@16         |                    | 0.00084356  | 1992.81482 | 665.2789   | 1992.81409 | 665.278626 | 3  | 20      | 14.8508 | 84.97 |
| 10 | 42.4 | 44.59 | 60.6 | GPC4_FlexIII  | 99.0 | ICPOGSTCCSQEMEEK                         | Propionamide(C)@2; Propionamide(C)@8; Propionamide(C)@9; Label: 13C(6)15N(2)(K)@16         |                    | 0.0021083   | 1992.81604 | 997.4153   | 1992.81409 | 997.414307 | 2  | 17      | 14.9228 | 84.97 |
| 10 | 42.4 | 44.59 | 60.6 | GPC4_FlexIII  | 99.0 | ISDAIMMQDINSVQSQK                        | Deamidated(N)@7; Label: 13C(6)15N(2)(K)@18                                                 |                    | 0.0298882   | 2015.96753 | 1008.991   | 2015.93835 | 1008.97644 | 2  | 16      | 17.0687 | 84.97 |
| 10 | 42.4 | 44.59 | 60.6 | GPC4_FlexIII  | 99.0 | ISDAIMMQDINSVQSQK                        | Label: 13C(6)15N(2)(K)@18                                                                  |                    | 0.00254801  | 2014.95752 | 1008.486   | 2014.95435 | 1008.48444 | 2  | 26      | 17.0914 | 84.97 |
| 10 | 42.4 | 44.59 | 60.6 | GPC4_FlexIII  | 99.0 | ISDAIMMQDINSVQSQK                        | Label: 13C(6)15N(2)(K)@18                                                                  |                    | 0.00254801  | 2014.95752 | 1008.486   | 2014.95435 | 1008.48444 | 2  | 24      | 17.0939 | 84.97 |
| 10 | 42.4 | 44.59 | 60.6 | GPC4_FlexIII  | 99.0 | ISDAIMMQDINSVQSQK                        | Label: 13C(6)15N(2)(K)@18                                                                  |                    | 0.00653231  | 2014.96082 | 672.6609   | 2014.95435 | 672.658691 | 3  | 21      | 17.1016 | 84.97 |
| 10 | 42.4 | 44.59 | 60.6 | GPC4_FlexIII  | 99.0 | ISDAIMMQDINSVQSQK                        | Label: 13C(6)15N(2)(K)@18                                                                  |                    | 0.00254801  | 2014.95752 | 1008.486   | 2014.95435 | 1008.48444 | 2  | 21      | 17.1167 | 84.97 |
| 10 | 42.4 | 44.59 | 60.6 | GPC4_FlexIII  | 99.0 | ISDAIMMQDINSVQSQK                        | Label: 13C(6)15N(2)(K)@18                                                                  |                    | -0.00024262 | 2014.9541  | 672.6586   |            |            |    |         |         |       |

|    |      |       |      |             |      |                     |                                                                      |             |            |          |            |            |   |    |         |       |
|----|------|-------|------|-------------|------|---------------------|----------------------------------------------------------------------|-------------|------------|----------|------------|------------|---|----|---------|-------|
| 10 | 42.4 | 44.59 | 60.6 | GPC4_FlexII | 99.0 | LEGPFNIESVMDPIDVK   | Label: 13C(6)15N(2)(K) @ 17                                          | -0.0045735  | 1909.9541  | 955.9843 | 1909.95862 | 955.986633 | 2 | 21 | 19.9755 | 84.97 |
| 10 | 42.4 | 44.59 | 60.6 | GPC4_FlexII | 99.0 | LEGPFNIESVMDPIDVK   | Label: 13C(6)15N(2)(K) @ 17                                          | -0.0045735  | 1909.9541  | 955.9843 | 1909.95862 | 955.986633 | 2 | 21 | 19.9857 | 84.97 |
| 10 | 42.4 | 44.59 | 60.6 | GPC4_FlexII | 99.0 | LEGPFNIESVMDPIDVK   | Label: 13C(6)15N(2)(K) @ 17                                          | -0.0045735  | 1909.9541  | 955.9843 | 1909.95862 | 955.986633 | 2 | 17 | 20.0111 | 84.97 |
| 10 | 42.4 | 44.59 | 60.6 | GPC4_FlexII | 99.0 | LEGPFNIESVMDPIDVK   |                                                                      | 0.00337396  | 1901.94788 | 951.9812 | 1901.94446 | 951.979492 | 2 | 16 | 20.1053 | 84.97 |
| 10 | 42.4 | 44.59 | 60.6 | GPC4_FlexII | 99.0 | LEGPFNIESVMDPIDVK   | Label: 13C(6)15N(2)(K) @ 17                                          | -0.00359693 | 1909.95508 | 955.9848 | 1909.95862 | 955.986633 | 2 | 17 | 20.2755 | 84.97 |
| 10 | 42.4 | 44.59 | 60.6 | GPC4_FlexII | 99.0 | LEGPFNIESVMDPIDVK   | Label: 13C(6)15N(2)(K) @ 17                                          | -0.0107991  | 1909.94788 | 955.9812 | 1909.95862 | 955.986633 | 2 | 18 | 20.5064 | 84.97 |
| 10 | 42.4 | 44.59 | 60.6 | GPC4_FlexII | 99.0 | LEGPFNIESVMDPIDVK   | Deamidated(N) @ 6                                                    | 0.0193616   | 1902.94788 | 952.4812 | 1902.92847 | 952.471497 | 2 | 13 | 20.1078 | 84.97 |
| 10 | 42.4 | 44.59 | 60.6 | GPC4_FlexII | 99.0 | LEGPFNIESVMDPIDVK   | Label: 13C(6)15N(2)(K) @ 17                                          | -0.00420729 | 1909.95447 | 955.9845 | 1909.95862 | 955.986633 | 2 | 12 | 20.2147 | 84.97 |
| 10 | 42.4 | 44.59 | 60.6 | GPC4_FlexII | 99.0 | LEGPFNIESVMDPIDVK   | Deamidated(N) @ 6; Label: 13C(6)15N(2)(K) @ 17                       | 0.0252081   | 1910.9679  | 956.4912 | 1910.94263 | 956.478638 | 2 | 12 | 20.4885 | 84.97 |
| 10 | 42.4 | 44.59 | 60.6 | GPC4_FlexII | 99.0 | LVNSQYHFTDYLECYSK   | Propionamide(C) @ 15; Label: 13C(6)15N(2)(K) @ 18                    | 0.00205325  | 2253.05225 | 752.0247 | 2253.05029 | 752.024048 | 3 | 18 | 17.642  | 84.97 |
| 10 | 42.4 | 44.59 | 60.6 | GPC4_FlexII | 99.0 | LVNSQYHFTDYLECYSK   | Propionamide(C) @ 15; Label: 13C(6)15N(2)(K) @ 18                    | 0.00205325  | 2253.05225 | 752.0247 | 2253.05029 | 752.024048 | 3 | 17 | 17.6522 | 84.97 |
| 10 | 42.4 | 44.59 | 60.6 | GPC4_FlexII | 99.0 | MAAGNGNEDDCWNGK     | Propionamide(C) @ 11; Label: 13C(6)15N(2)(K) @ 15                    | 0.00023347  | 1659.6499  | 830.8322 | 1659.64966 | 830.832153 | 2 | 20 | 15.2315 | 84.97 |
| 10 | 42.4 | 44.59 | 60.6 | GPC4_FlexII | 99.0 | MAAGNGNEDDCWNGK     | Propionamide(C) @ 11; Label: 13C(6)15N(2)(K) @ 15                    | 0.00194246  | 1659.65173 | 830.8331 | 1659.64966 | 830.832153 | 2 | 18 | 15.2743 | 84.97 |
| 10 | 42.4 | 44.59 | 60.6 | GPC4_FlexII | 99.0 | MAAGNGNEDDCWNGK     | Deamidated(N) @ 5; Propionamide(C) @ 11; Label: 13C(6)15N(2)(K) @ 15 | 0.00303749  | 1660.63684 | 831.3257 | 1660.63367 | 831.324158 | 2 | 18 | 15.3748 | 84.97 |
| 10 | 42.4 | 44.59 | 60.6 | GPC4_FlexII | 99.0 | MAAGNGNEDDCWNGK     | Deamidated(N) @ 5; Propionamide(C) @ 11; Label: 13C(6)15N(2)(K) @ 15 | 0.00193885  | 1660.63562 | 831.3251 | 1660.63367 | 831.324158 | 2 | 16 | 15.4551 | 84.97 |
| 10 | 42.4 | 44.59 | 60.6 | GPC4_FlexII | 99.0 | MYCSHCR             | Propionamide(C) @ 4; Propionamide(C) @ 7; Label: 13C(6)15N(4)(R) @ 8 | -1.04E-05   | 1163.49133 | 582.7529 | 1163.49133 | 582.75293  | 2 | 10 | 14.0523 | 84.97 |
| 10 | 42.4 | 44.59 | 60.6 | GPC4_FlexII | 99.0 | NDAPLHEINGDHLK      | Label: 13C(6)15N(2)(K) @ 14                                          | 0.00542018  | 1579.78882 | 790.9017 | 1579.78345 | 790.898987 | 2 | 21 | 15.3648 | 84.97 |
| 10 | 42.4 | 44.59 | 60.6 | GPC4_FlexII | 99.0 | NDAPLHEINGDHLK      | Deamidated(N) @ 9; Label: 13C(6)15N(2)(K) @ 14                       | 0.00041167  | 1580.76782 | 791.3912 | 1580.76746 | 791.390991 | 2 | 21 | 15.5125 | 84.97 |
| 10 | 42.4 | 44.59 | 60.6 | GPC4_FlexII | 99.0 | NDAPLHEINGDHLK      | Label: 13C(6)15N(2)(K) @ 14                                          | -0.00066636 | 1579.78272 | 527.6015 | 1579.78345 | 527.601746 | 3 | 13 | 15.2591 | 84.97 |
| 10 | 42.4 | 44.59 | 60.6 | GPC4_FlexII | 99.0 | NDAPLHEINGDHLK      | Label: 13C(6)15N(2)(K) @ 14                                          | -0.00066636 | 1579.78272 | 527.6015 | 1579.78345 | 527.601746 | 3 | 13 | 15.2616 | 84.97 |
| 10 | 42.4 | 44.59 | 60.6 | GPC4_FlexII | 99.0 | NDAPLHEINGDHLK      | Label: 13C(6)15N(2)(K) @ 14                                          | -0.00066636 | 1579.78272 | 527.6015 | 1579.78345 | 527.601746 | 3 | 13 | 15.3219 | 84.97 |
| 10 | 42.4 | 44.59 | 60.6 | GPC4_FlexII | 99.0 | NDAPLHEINGDHLK      | Label: 13C(6)15N(2)(K) @ 14                                          | -0.00066636 | 1579.78272 | 527.6015 | 1579.78345 | 527.601746 | 3 | 12 | 15.2944 | 84.97 |
| 10 | 42.4 | 44.59 | 60.6 | GPC4_FlexII | 99.0 | NDAPLHEINGDHLK      | Deamidated(N) @ 9; Label: 13C(6)15N(2)(K) @ 14                       | 0.00152731  | 1580.78688 | 527.9302 | 1580.76746 | 527.929749 | 3 | 12 | 15.5075 | 84.97 |
| 10 | 42.4 | 44.59 | 60.6 | GPC4_FlexII | 99.0 | NDAPLHEINGDHLK      | Deamidated(N) @ 9; Label: 13C(6)15N(2)(K) @ 14                       | 0.00024556  | 1580.76758 | 527.9298 | 1580.76746 | 527.929749 | 3 | 11 | 16.0864 | 84.97 |
| 10 | 42.4 | 44.59 | 60.6 | GPC4_FlexII | 99.0 | SISESAFSAR          | Label: 13C(6)15N(4)(R) @ 10                                          | 0.00064533  | 1063.51807 | 532.7663 | 1063.51733 | 532.76593  | 2 | 11 | 16.0084 | 84.97 |
| 10 | 42.4 | 44.59 | 60.6 | GPC4_FlexII | 99.0 | SISESAFSAR          | Label: 13C(6)15N(4)(R) @ 10                                          | 0.00064533  | 1063.51807 | 532.7663 | 1063.51733 | 532.76593  | 2 | 11 | 16.0107 | 84.97 |
| 10 | 42.4 | 44.59 | 60.6 | GPC4_FlexII | 99.0 | SISESAFSAR          | Label: 13C(6)15N(4)(R) @ 10                                          | 0.00064533  | 1063.51807 | 532.7663 | 1063.51733 | 532.76593  | 2 | 10 | 16.0158 | 84.97 |
| 10 | 42.4 | 44.59 | 60.6 | GPC4_FlexII | 99.0 | SLNDFMVK            | Label: 13C(6)15N(2)(K) @ 8                                           | -0.0158818  | 960.481445 | 481.248  | 960.483032 | 481.248779 | 2 | 10 | 17.6244 | 84.97 |
| 10 | 42.4 | 44.59 | 60.6 | GPC4_FlexII | 99.0 | SVVSEQC�NHQLQAVFASR | Propionamide(C) @ 7; Deamidated(N) @ 8; Label: 13C(6)15N(4)(R) @ 17  | 0.0090074   | 1955.94873 | 652.9902 | 1955.93982 | 652.987244 | 3 | 15 | 16.9427 | 84.97 |
| 10 | 42.4 | 44.59 | 60.6 | GPC4_FlexII | 99.0 | SVVSEQC�NHQLQAVFASR | Propionamide(C) @ 7; Deamidated(N) @ 8; Label: 13C(6)15N(4)(R) @ 17  | 0.00422965  | 1955.94409 | 978.9793 | 1955.93982 | 978.977234 | 2 | 23 | 16.9956 | 84.97 |
| 10 | 42.4 | 44.59 | 60.6 | GPC4_FlexII | 99.0 | SVVSEQC�NHQLQAVFASR | Propionamide(C) @ 7; Label: 13C(6)15N(4)(R) @ 17                     | 0.00296851  | 1954.95886 | 652.6602 | 1954.95581 | 652.659241 | 3 | 16 | 17.3039 | 84.97 |
| 10 | 42.4 | 44.59 | 60.6 | GPC4_FlexII | 99.0 | SVVSEQC�NHQLQAVFASR | Propionamide(C) @ 7; Label: 13C(6)15N(4)(R) @ 17                     | 0.00081527  | 1954.95667 | 978.4856 | 1954.95581 | 978.48523  | 2 | 28 | 17.3217 | 84.97 |
| 10 | 42.4 | 44.59 | 60.6 | GPC4_FlexII | 99.0 | SVVSEQC�NHQLQAVFASR | Propionamide(C) @ 7; Label: 13C(6)15N(4)(R) @ 17                     | 0.00301254  | 1954.95886 | 978.4867 | 1954.95581 | 978.48523  | 2 | 28 | 17.3343 | 84.97 |
| 10 | 42.4 | 44.59 | 60.6 | GPC4_FlexII | 99.0 | SVVSEQC�NHQLQAVFASR | Propionamide(C) @ 7; Label: 13C(6)15N(4)(R) @ 17                     | 0.00215805  | 1954.95813 | 978.4863 | 1954.95581 | 978.48523  | 2 | 23 | 17.3646 | 84.97 |
| 10 | 42.4 | 44.59 | 60.6 | GPC4_FlexII | 99.0 | SVVSEQC�NHQLQAVFASR | Propionamide(C) @ 7; Label: 13C(6)15N(4)(R) @ 17                     | 0.00095434  | 1954.95667 | 652.6595 | 1954.95581 | 652.659241 | 3 | 14 | 17.3672 | 84.97 |
| 10 | 42.4 | 44.59 | 60.6 | GPC4_FlexII | 99.0 | SVVSEQC�NHQLQAVFASR | Propionamide(C) @ 7; Label: 13C(6)15N(4)(R) @ 17                     | 0.00264633  | 1954.9585  | 978.4865 | 1954.95581 | 978.48523  | 2 | 17 | 17.4228 | 84.97 |
| 10 | 42.4 | 44.59 | 60.6 | GPC4_FlexII | 99.0 | SVVSEQC�NHQLQAVFASR | Propionamide(C) @ 7; Label: 13C(6)15N(4)(R) @ 17                     | 0.00150366  | 1954.9574  | 652.6597 | 1954.95581 | 652.659241 | 3 | 17 | 17.4506 | 84.97 |
| 10 | 42.4 | 44.59 | 60.6 | GPC4_FlexII | 99.0 | SVVSEQC�NHQLQAVFASR | Propionamide(C) @ 7; Label: 13C(6)15N(4)(R) @ 17                     | 0.00095434  | 1954.95667 | 652.6595 | 1954.95581 | 652.659241 | 3 | 14 | 17.4708 | 84.97 |
| 10 | 42.4 | 44.59 | 60.6 | GPC4_FlexII | 99.0 | SVVSEQC�NHQLQAVFASR | Propionamide(C) @ 7; Label: 13C(6)15N(4)(R) @ 17                     | 0.00095434  | 1954.95667 | 652.6595 | 1954.95581 | 652.659241 | 3 | 18 | 17.4809 | 84.97 |
| 10 | 42.4 | 44.59 | 60.6 | GPC4_FlexII | 99.0 | SVVSEQC�NHQLQAVFASR | Propionamide(C) @ 7; Label: 13C(6)15N(4)(R) @ 17                     | 0.00095434  | 1954.95667 | 652.6595 | 1954.95581 | 652.659241 | 3 | 16 | 17.4832 | 84.97 |
| 10 | 42.4 | 44.59 | 60.6 | GPC4_FlexII | 99.0 | SVVSEQC�NHQLQAVFASR | Propionamide(C) @ 7; Label: 13C(6)15N(4)(R) @ 17                     | 0.00398911  | 1954.95984 | 978.4872 | 1954.95581 | 978.48523  | 2 | 26 | 17.5111 | 84.97 |
| 10 | 42.4 | 44.59 | 60.6 | GPC4_FlexII | 99.0 | SVVSEQC�NHQLQAVFASR | Propionamide(C) @ 7; Label: 13C(6)15N(4)(R) @ 17                     | 0.00223608  | 1954.95813 | 652.66   | 1954.95581 | 652.659241 | 3 | 14 | 26.6396 | 84.97 |
| 10 | 42.4 | 44.59 | 60.6 | GPC4_FlexII | 99.0 | SVVSEQC�NHQLQAVFASR | Propionamide(C) @ 7; Label: 13C(6)15N(4)(R) @ 17                     | 0.00223608  | 1954.95813 | 652.66   | 1954.95581 | 652.659241 | 3 | 15 | 26.6472 | 84.97 |
| 10 | 42.4 | 44.59 | 60.6 | GPC4_FlexII | 99.0 | SVVSEQC�NHQLQAVFASR | Deamidated(Q) @ 6; Propionamide(C) @ 7; Label: 13C(6)15N(4)(R) @ 17  | 0.0090074   | 1955.94873 | 652.9902 | 1955.93982 | 652.987244 | 3 | 12 | 27.1581 | 84.97 |
| 10 | 42.4 | 44.59 | 60.6 | GPC4_FlexII | 99.0 | SVVSEQC�NHQLQAVFASR | Propionamide(C) @ 7; Label: 13C(6)15N(4)(R) @ 17                     | 0.00058813  | 1954.95642 | 652.6594 | 1954.95581 | 652.659241 | 3 | 11 | 27.1683 | 84.97 |
| 10 | 42.4 | 44.59 | 60.6 | GPC4_FlexII | 99.0 | SVVSEQC�NHQLQAVFASR | Deamidated(Q) @ 6; Propionamide(C) @ 7; Label: 13C(6)15N(4)(R) @ 17  | 0.010636    | 1955.95056 | 652.9908 | 1955.93982 | 652.987244 | 3 | 13 | 17.4376 | 84.97 |
| 10 | 42.4 | 44.59 | 60.6 | GPC4_FlexII | 99.0 | SVVSEQC�NHQLQAVFASR | Propionamide(C) @ 7; Label: 13C(6)15N(4)(R) @ 17                     | 0.00223608  | 1954.95813 | 652.66   | 1954.95581 | 652.659241 | 3 | 13 | 26.6371 | 84.97 |
| 10 | 42.4 | 44.59 | 60.6 | GPC4_FlexII | 99.0 | SVVSEQC�NHQLQAVFASR | Propionamide(C) @ 7; Label: 13C(6)15N(4)(R) @ 17                     | 0.00296851  | 1954.95886 | 652.6602 | 1954.95581 | 652.659241 | 3 | 9  | 27.1556 | 84.97 |
| 10 | 42.4 | 44.59 | 60.6 | GPC4_FlexII | 99.0 | TFAQGLAVAGDVVSK     | Label: 13C(6)15N(2)(K) @ 15                                          | 8.44E-05    | 1469.79712 | 735.9058 | 1469.797   | 735.905762 | 2 | 19 | 18.0014 | 84.97 |
| 10 | 42.4 | 44.59 | 60.6 | GPC4_FlexII | 99.0 | TFAQGLAVAGDVVSK     | Label: 13C(6)15N(2)(K) @ 15                                          | 8.44E-05    | 1469.79712 | 735.9058 | 1469.797   | 735.905762 | 2 | 19 | 18.0039 | 84.97 |
| 10 | 42.4 | 44.59 | 60.6 | GPC4_FlexII | 99.0 | TFAQGLAVAGDVVSK     | Label: 13C(6)15N(2)(K) @ 15                                          | 8.44E-05    | 1469.79712 | 735.9058 | 1469.797   | 735.905762 | 2 | 17 | 18.0065 | 84.97 |
| 10 | 42.4 | 44.59 | 60.6 | GPC4_FlexII | 99.0 | TFAQGLAVAGDVVSK     | Label: 13C(6)15N(2)(K) @ 15                                          | -0.00078366 | 1469.79602 | 490.9393 | 1469.797   | 490.939606 | 3 | 17 | 18.0318 | 84.97 |
| 10 | 42.4 | 44.59 | 60.6 | GPC4_FlexII | 99.0 | TFAQGLAVAGDVVSK     | Label: 13C(6)15N(2)(K) @ 15                                          | -0.00078366 | 1469.79602 | 490.9393 | 1469.797   | 490.939606 | 3 | 17 | 18.0368 | 84.97 |
| 10 | 42.4 | 44.59 | 60.6 | GPC4_FlexII | 99.0 | TFAQGLAVAGDVVSK     | Label: 13C(6)15N(2)(K) @ 15                                          | 0.0003285   | 1469.79724 | 735.9059 | 1469.797   | 735.905762 | 2 | 16 | 18.0394 | 84.97 |
| 10 | 42.4 | 44.59 | 60.6 | GPC4_FlexII | 99.0 | TFAQGLAVAGDVVSK     | Label: 13C(6)15N(2)(K) @ 15                                          | -0.00078366 | 1469.79602 | 490.9393 | 1469.797   | 490.939606 | 3 | 16 | 18.0495 | 84.97 |
| 10 | 42.4 | 44.59 | 60.6 | GPC4_FlexII | 99.0 | TFAQGLAVAGDVVSK     | Label: 13C(6)15N(2)(K) @ 15                                          | 0.00069471  | 1469.79973 | 735.9061 | 1469.797   | 735.905762 | 2 | 14 | 18.09   | 84.97 |
| 10 | 42.4 | 44.59 | 60.6 | GPC4_FlexII | 99.0 | TFAQGLAVAGDVVSK     | Label: 13C(6)15N(2)(K) @ 15                                          | 0.0094838   | 1469.80652 | 735.9105 | 1469.797   | 735.905762 | 2 | 17 | 18.938  | 84.97 |
| 10 | 42.4 | 44.59 | 60.6 | GPC4_FlexII | 99.0 | TFAQGLAVAGDVVSK     | Label: 13C(6)15N(2)(K) @ 15                                          | -0.0104137  | 1469.7865  | 735.9005 | 1469.797   | 735.905762 | 2 | 16 | 19.6179 | 84.97 |
| 10 | 42.4 | 44.59 | 60.6 | GPC4_FlexII | 99.0 | TFAQGLAVAGDVVSK     | Label: 13C(6)15N(2)(K) @ 15                                          | -0.0104137  | 1469.7865  | 735.9005 | 1469.797   | 735.90     |   |    |         |       |

|    |      |       |      |                |      |                                 |                                                                                                              |             |            |          |            |            |   |    |         |       |
|----|------|-------|------|----------------|------|---------------------------------|--------------------------------------------------------------------------------------------------------------|-------------|------------|----------|------------|------------|---|----|---------|-------|
| 10 | 42.4 | 44.59 | 60.6 | GPC4_FlexIII   | 99.0 | TFAQGLAVAGDVVSK                 | Label:13C(6)15N(2)(K)@15                                                                                     | 0.0094838   | 1469.80652 | 735.9105 | 1469.797   | 735.905762 | 2 | 10 | 21.9254 | 84.97 |
| 10 | 42.4 | 44.59 | 60.6 | GPC4_FlexIII   | 99.0 | TFAQGLAVAGDVVSK                 | Deamidated(O)@4; Label:13C(6)15N(2)(K)@15                                                                    | 0.00557393  | 1470.7865  | 736.4005 | 1470.78101 | 736.397766 | 2 | 10 | 21.928  | 84.97 |
| 10 | 42.4 | 44.59 | 60.6 | GPC4_FlexIII   | 99.0 | TFAQGLAVAGDVVSK                 | Label:13C(6)15N(2)(K)@15                                                                                     | 0.00374648  | 1469.80066 | 735.9076 | 1469.797   | 735.905762 | 2 | 10 | 26.5446 | 84.97 |
| 10 | 42.4 | 44.59 | 60.6 | GPC4_FlexIII   | 99.0 | TFAQGLAVAGDVVSK                 | Label:13C(6)15N(2)(K)@15                                                                                     | 0.0094838   | 1469.80652 | 735.9105 | 1469.797   | 735.905762 | 2 | 9  | 21.1877 | 84.97 |
| 10 | 42.4 | 44.59 | 60.6 | GPC4_FlexIII   | 99.0 | VFQCGGPPKPLPAGR                 | Propionamide(C)@5; Label:13C(6)15N(2)(K)@9; Label:13C(6)15N(4)(R)@15                                         | -0.0010222  | 1611.86646 | 538.2961 | 1611.86743 | 538.296448 | 3 | 14 | 15.5151 | 84.97 |
| 10 | 42.4 | 44.59 | 60.6 | GPC4_FlexIII   | 99.0 | VFQCGGPPKPLPAGR                 | Propionamide(C)@5; Label:13C(6)15N(2)(K)@9; Label:13C(6)15N(4)(R)@15                                         | -0.00047289 | 1611.86719 | 538.2963 | 1611.86743 | 538.296448 | 3 | 14 | 15.5274 | 84.97 |
| 10 | 42.4 | 44.59 | 60.6 | GPC4_FlexIII   | 99.0 | VFQCGGPPKPLPAGR                 | Propionamide(C)@5; Label:13C(6)15N(2)(K)@9; Label:13C(6)15N(4)(R)@15                                         | -0.00047289 | 1611.86719 | 538.2963 | 1611.86743 | 538.296448 | 3 | 14 | 15.5375 | 84.97 |
| 10 | 42.4 | 44.59 | 60.6 | GPC4_FlexIII   | 99.0 | VFQCGGPPKPLPAGR                 | Propionamide(C)@5; Label:13C(6)15N(2)(K)@9; Label:13C(6)15N(4)(R)@15                                         | 0.00012047  | 1611.86743 | 806.941  | 1611.86743 | 806.940979 | 2 | 21 | 15.5602 | 84.97 |
| 10 | 42.4 | 44.59 | 60.6 | GPC4_FlexIII   | 99.0 | VFQCGGPPKPLPAGR                 | Propionamide(C)@5; Label:13C(6)15N(2)(K)@9; Label:13C(6)15N(4)(R)@15                                         | 0.00012047  | 1611.86743 | 806.941  | 1611.86743 | 806.940979 | 2 | 22 | 15.5676 | 84.97 |
| 10 | 42.4 | 44.59 | 60.6 | GPC4_FlexIII   | 99.0 | VFQCGGPPKPLPAGR                 | Propionamide(C)@5; Label:13C(6)15N(2)(K)@9; Label:13C(6)15N(4)(R)@15                                         | -0.00047289 | 1611.86719 | 538.2963 | 1611.86743 | 538.296448 | 3 | 14 | 15.5727 | 84.97 |
| 10 | 42.4 | 44.59 | 60.6 | GPC4_FlexIII   | 99.0 | VFQCGGPPKPLPAGR                 | Propionamide(C)@5; Label:13C(6)15N(2)(K)@9; Label:13C(6)15N(4)(R)@15                                         | 0.00012047  | 1611.86743 | 806.941  | 1611.86743 | 806.940979 | 2 | 21 | 15.5977 | 84.97 |
| 10 | 42.4 | 44.59 | 60.6 | GPC4_FlexIII   | 99.0 | VFQCGGPPKPLPAGR                 | Propionamide(C)@5; Label:13C(6)15N(2)(K)@9; Label:13C(6)15N(4)(R)@15                                         | 7.64E-05    | 1611.86731 | 538.2964 | 1611.86743 | 538.296448 | 3 | 13 | 16.0334 | 84.97 |
| 10 | 42.4 | 44.59 | 60.6 | GPC4_FlexIII   | 99.0 | VFQCGGPPKPLPAGR                 | Propionamide(C)@5; Label:13C(6)15N(2)(K)@9; Label:13C(6)15N(4)(R)@15                                         | 7.64E-05    | 1611.86731 | 538.2964 | 1611.86743 | 538.296448 | 3 | 11 | 26.7059 | 84.97 |
| 10 | 42.4 | 44.59 | 60.6 | GPC4_FlexIII   | 99.0 | VFQCGGPPKPLPAGR                 | Propionamide(C)@5; Label:13C(6)15N(2)(K)@9; Label:13C(6)15N(4)(R)@15                                         | 7.64E-05    | 1611.86731 | 538.2964 | 1611.86743 | 538.296448 | 3 | 10 | 26.7008 | 84.97 |
| 10 | 42.4 | 44.59 | 60.6 | GPC4_FlexIII   | 99.0 | VSVVNPTAQCTHALLK                | Propionamide(C)@10; Label:13C(6)15N(2)(K)@16                                                                 | 0.00059073  | 1758.95508 | 587.3256 | 1758.95422 | 587.325317 | 3 | 15 | 16.4905 | 84.97 |
| 10 | 42.4 | 44.59 | 60.6 | GPC4_FlexIII   | 99.0 | VSVVNPTAQCTHALLK                | Propionamide(C)@10; Label:13C(6)15N(2)(K)@16                                                                 | 0.00059073  | 1758.95508 | 587.3256 | 1758.95422 | 587.325317 | 3 | 15 | 16.4956 | 84.97 |
| 10 | 42.4 | 44.59 | 60.6 | GPC4_FlexIII   | 99.0 | VSVVNPTAQCTHALLK                | Propionamide(C)@10; Label:13C(6)15N(2)(K)@16                                                                 | 0.00059073  | 1758.95508 | 587.3256 | 1758.95422 | 587.325317 | 3 | 15 | 16.4981 | 84.97 |
| 10 | 42.4 | 44.59 | 60.6 | GPC4_FlexIII   | 99.0 | VSVVNPTAQCTHALLK                | Propionamide(C)@10; Label:13C(6)15N(2)(K)@16                                                                 | -0.00032481 | 1758.9541  | 587.3253 | 1758.95422 | 587.325317 | 3 | 14 | 16.5603 | 84.97 |
| 10 | 42.4 | 44.59 | 60.6 | GPC4_FlexIII   | 99.0 | VSVVNPTAQCTHALLK                | Propionamide(C)@10; Label:13C(6)15N(2)(K)@16                                                                 | 0.0025879   | 1758.95691 | 880.4857 | 1758.95422 | 880.484375 | 2 | 24 | 16.5628 | 84.97 |
| 10 | 42.4 | 44.59 | 60.6 | GPC4_FlexIII   | 99.0 | VSVVNPTAQCTHALLK                | Propionamide(C)@10; Label:13C(6)15N(2)(K)@16                                                                 | 0.0025879   | 1758.95691 | 880.4857 | 1758.95422 | 880.484375 | 2 | 21 | 16.5752 | 84.97 |
| 10 | 42.4 | 44.59 | 60.6 | GPC4_FlexIII   | 99.0 | VSVVNPTAQCTHALLK                | Propionamide(C)@10; Label:13C(6)15N(2)(K)@16                                                                 | 0.00185547  | 1758.95606 | 880.4853 | 1758.95422 | 880.484375 | 2 | 20 | 16.6052 | 84.97 |
| 10 | 42.4 | 44.59 | 60.6 | GPC4_FlexIII   | 99.0 | VSVVNPTAQCTHALLK                | Propionamide(C)@10; Label:13C(6)15N(2)(K)@16                                                                 | 4.14E-05    | 1758.95435 | 587.3254 | 1758.95422 | 587.325317 | 3 | 13 | 16.6372 | 84.97 |
| 10 | 42.4 | 44.59 | 60.6 | GPC4_FlexIII   | 99.0 | VSVVNPTAQCTHALLK                | Propionamide(C)@10; Label:13C(6)15N(2)(K)@16                                                                 | 4.14E-05    | 1758.95435 | 587.3254 | 1758.95422 | 587.325317 | 3 | 12 | 26.6751 | 84.97 |
| 10 | 42.4 | 44.59 | 60.6 | GPC4_FlexIII   | 99.0 | YLFAVTGNGLANGNNPEVQVDTSKPDILILR | Label:13C(6)15N(2)(K)@25; Label:13C(6)15N(4)(R)@32                                                           | -0.0101492  | 3473.81641 | 1158.946 | 3473.82739 | 1158.94971 | 3 | 22 | 19.1231 | 84.97 |
| 10 | 42.4 | 44.59 | 60.6 | GPC4_FlexIII   | 99.0 | YLFAVTGNGLANGNNPEVQVDTSKPDILILR | Label:13C(6)15N(2)(K)@25; Label:13C(6)15N(4)(R)@32                                                           | -0.0101492  | 3473.81641 | 1158.946 | 3473.82739 | 1158.94971 | 3 | 21 | 19.1308 | 84.97 |
| 10 | 42.4 | 44.59 | 60.6 | GPC4_FlexIII   | 99.0 | YLFAVTGNGLANGNNPEVQVDTSKPDILILR | Label:13C(6)15N(2)(K)@25; Label:13C(6)15N(4)(R)@32                                                           | -0.0101492  | 3473.81641 | 1158.946 | 3473.82739 | 1158.94971 | 3 | 21 | 19.1334 | 84.97 |
| 10 | 42.4 | 44.59 | 60.6 | GPC4_FlexIII   | 99.0 | YLFAVTGNGLANGNNPEVQVDTSKPDILILR | Deamidated(N)@16; Label:13C(6)15N(2)(K)@25; Label:13C(6)15N(4)(R)@32                                         | 0.00341401  | 3474.81494 | 869.711  | 3474.81128 | 869.710144 | 4 | 17 | 19.192  | 84.97 |
| 10 | 42.4 | 44.59 | 60.6 | GPC4_FlexIII   | 99.0 | YLFAVTGNGLANGNNPEVQVDTSKPDILILR | Label:13C(6)15N(2)(K)@25; Label:13C(6)15N(4)(R)@32                                                           | -0.0116141  | 3473.81641 | 1158.946 | 3473.82739 | 1158.94971 | 3 | 21 | 19.1946 | 84.97 |
| 10 | 42.4 | 44.59 | 60.6 | GPC4_FlexIII   | 99.0 | YLFAVTGNGLANGNNPEVQVDTSKPDILILR | Label:13C(6)15N(2)(K)@25; Label:13C(6)15N(4)(R)@32                                                           | -0.0125736  | 3473.81494 | 869.461  | 3473.82739 | 869.464111 | 4 | 18 | 19.2428 | 84.97 |
| 10 | 42.4 | 44.59 | 60.6 | GPC4_FlexIII   | 99.0 | YLFAVTGNGLANGNNPEVQVDTSKPDILILR | Label:13C(6)15N(2)(K)@25; Label:13C(6)15N(4)(R)@32                                                           | -0.00868438 | 3473.81934 | 1158.947 | 3473.82739 | 1158.94971 | 3 | 19 | 19.2505 | 84.97 |
| 10 | 42.4 | 44.59 | 60.6 | GPC4_FlexIII   | 99.0 | YLFAVTGNGLANGNNPEVQVDTSKPDILILR | Label:13C(6)15N(2)(K)@25; Label:13C(6)15N(4)(R)@32                                                           | -0.0113529  | 3473.81616 | 869.4613 | 3473.82739 | 869.464111 | 4 | 17 | 19.2633 | 84.97 |
| 10 | 42.4 | 44.59 | 60.6 | GPC4_FlexIII   | 99.0 | YLFAVTGNGLANGNNPEVQVDTSKPDILILR | Deamidated(N)@12; Label:13C(6)15N(2)(K)@25; Label:13C(6)15N(4)(R)@32                                         | 0.0125523   | 3474.82422 | 1159.282 | 3474.81128 | 1159.27771 | 3 | 16 | 19.6356 | 84.97 |
| 10 | 42.4 | 44.59 | 60.6 | GPC4_FlexIII   | 99.0 | YPTFLYK                         | Label:13C(6)15N(2)(K)@7                                                                                      | -0.00061447 | 938.498657 | 470.2566 | 938.499329 | 470.256928 | 2 | 9  | 17.7815 | 84.97 |
| 10 | 42.4 | 44.59 | 60.6 | GPC4_FlexIII   | 99.0 | YTEQLKPFGDVPR                   | Label:13C(6)15N(2)(K)@6; Label:13C(6)15N(4)(R)@13                                                            | 0.00247065  | 1566.81873 | 784.4166 | 1566.81616 | 784.415344 | 2 | 20 | 16.8346 | 84.97 |
| 10 | 42.4 | 44.59 | 60.6 | GPC4_FlexIII   | 99.0 | YTEQLKPFGDVPR                   | Label:13C(6)15N(2)(K)@6; Label:13C(6)15N(4)(R)@13                                                            | 0.00247065  | 1566.81873 | 784.4166 | 1566.81616 | 784.415344 | 2 | 21 | 16.8372 | 84.97 |
| 10 | 42.4 | 44.59 | 60.6 | GPC4_FlexIII   | 99.0 | YTEQLKPFGDVPR                   | Label:13C(6)15N(2)(K)@6; Label:13C(6)15N(4)(R)@13                                                            | 0.00163315  | 1566.81751 | 523.2798 | 1566.81616 | 523.279297 | 3 | 13 | 16.807  | 84.97 |
| 10 | 42.4 | 44.59 | 60.6 | GPC4_FlexIII   | 99.0 | YTEQLKPFGDVPR                   | Label:13C(6)15N(2)(K)@6; Label:13C(6)15N(4)(R)@13                                                            | -1.48E-05   | 1566.81604 | 523.2793 | 1566.81616 | 523.279297 | 3 | 12 | 16.8193 | 84.97 |
| 10 | 42.4 | 44.59 | 60.6 | GPC4_FlexIII   | 99.0 | YTEQLKPFGDVPR                   | Label:13C(6)15N(2)(K)@6; Label:13C(6)15N(4)(R)@13                                                            | -1.48E-05   | 1566.81604 | 523.2793 | 1566.81616 | 523.279297 | 3 | 12 | 16.8471 | 84.97 |
| 10 | 42.4 | 44.59 | 60.6 | GPC4_FlexIII   | 99.0 | YTEQLKPFGDVPR                   | Label:13C(6)15N(2)(K)@6; Label:13C(6)15N(4)(R)@13                                                            | 0.00035141  | 1566.81641 | 523.2794 | 1566.81616 | 523.279297 | 3 | 12 | 16.8799 | 84.97 |
| 10 | 42.4 | 44.59 | 60.6 | GPC4_FlexIII   | 99.0 | YTEQLKPFGDVPR                   | Label:13C(6)15N(2)(K)@6; Label:13C(6)15N(4)(R)@13                                                            | 0.00035141  | 1566.81641 | 523.2794 | 1566.81616 | 523.279297 | 3 | 12 | 16.9679 | 84.97 |
| 11 | 42   | 44    | 63.3 | EFEMP1_FlexIII | 99.0 | ADQVCINLR                       | Propionamide(C)@5; Label:13C(6)15N(4)(R)@9                                                                   | -0.00083471 | 1111.56751 | 556.791  | 1111.56836 | 556.791443 | 2 | 11 | 16.7007 | 50.15 |
| 11 | 42   | 44    | 63.3 | EFEMP1_FlexIII | 99.0 | CVCPVSNAMCR                     | Propionamide(C)@11; Propionamide(C)@3; Propionamide(C)@10                                                    | -0.00590875 | 1394.58691 | 698.3007 | 1394.59277 | 698.30365  | 2 | 12 | 15.831  | 50.15 |
| 11 | 42   | 44    | 63.3 | EFEMP1_FlexIII | 99.0 | CVNHGYGVLCLPK                   | Propionamide(C)@11; Propionamide(C)@10; Label:13C(6)15N(2)(K)@13                                             | -0.00226281 | 1615.77087 | 808.8927 | 1615.77307 | 808.893799 | 2 | 20 | 17.0537 | 50.15 |
| 11 | 42   | 44    | 63.3 | EFEMP1_FlexIII | 99.0 | DIDCEDIVPDACK                   | Propionamide(C)@5; Propionamide(C)@12; Label:13C(6)15N(2)(K)@13                                              | 0.00020655  | 1584.68933 | 793.3519 | 1584.68909 | 793.351807 | 2 | 15 | 26.6224 | 50.15 |
| 11 | 42   | 44    | 63.3 | EFEMP1_FlexIII | 99.0 | EHIVDEMLTVSSIGTFR               | Label:13C(6)15N(4)(R)@18                                                                                     | -0.00780322 | 2056.04614 | 686.356  | 2056.05396 | 686.358582 | 3 | 22 | 19.6603 | 50.15 |
| 11 | 42   | 44    | 63.3 | EFEMP1_FlexIII | 99.0 | ELPQSIYVK                       | Label:13C(6)15N(2)(K)@9                                                                                      | 0.00036493  | 1083.60584 | 542.8102 | 1083.60559 | 542.810059 | 2 | 9  | 16.758  | 50.15 |
| 11 | 42   | 44    | 63.3 | EFEMP1_FlexIII | 99.0 | FSCMCPQGYQVVR                   | Propionamide(C)@3; Propionamide(C)@5; Label:13C(6)15N(4)(R)@13                                               | 0.00072947  | 1668.74573 | 835.3801 | 1668.745   | 835.379761 | 2 | 15 | 17.0008 | 50.15 |
| 11 | 42   | 44    | 63.3 | EFEMP1_FlexIII | 99.0 | GSFACQCPGYOK                    | Propionamide(C)@5; Propionamide(C)@7; Label:13C(6)15N(2)(K)@13                                               | -8.94E-05   | 1534.67871 | 768.3466 | 1534.67883 | 768.346668 | 2 | 17 | 15.5793 | 50.15 |
| 11 | 42   | 44    | 63.3 | EFEMP1_FlexIII | 99.0 | IPSNPSHR                        | Label:13C(6)15N(4)(R)@8                                                                                      | -0.00054453 | 916.474854 | 306.4989 | 916.475403 | 306.499085 | 3 | 6  | 9.4826  | 50.15 |
| 11 | 42   | 44    | 63.3 | EFEMP1_FlexIII | 99.0 | IQCAAGYEQSEHNVCCDIDECTAGTHNCR   | Propionamide(C)@3; Propionamide(C)@15; Propionamide(C)@21; Propionamide(C)@28; Label:13C(6)15N(4)(R)@29      | -0.00519881 | 3488.44141 | 1163.821 | 3488.44775 | 1163.82324 | 3 | 25 | 16.4136 | 50.15 |
| 11 | 42   | 44    | 63.3 | EFEMP1_FlexIII | 99.0 | LNCEDIDECR                      | Propionamide(C)@3; Propionamide(C)@9; Label:13C(6)15N(4)(R)@10                                               | -0.00045695 | 1360.56226 | 681.2884 | 1360.56262 | 681.288635 | 2 | 15 | 15.4237 | 50.15 |
| 11 | 42   | 44    | 63.3 | EFEMP1_FlexIII | 99.0 | NNFVR                           | Label:13C(6)15N(4)(R)@6                                                                                      | -0.00113432 | 771.425659 | 386.7201 | 771.426697 | 386.720612 | 2 | 8  | 16.2706 | 50.15 |
| 11 | 42   | 44    | 63.3 | EFEMP1_FlexIII | 99.0 | NPCQDPYILTPENR                  | Propionamide(C)@3; Label:13C(6)15N(4)(R)@14                                                                  | 0.0019539   | 1739.8197  | 870.9171 | 1739.81763 | 870.916077 | 2 | 16 | 17.0386 | 50.15 |
| 11 | 42   | 44    | 63.3 | EFEMP1_FlexIII | 99.0 | QTSPPSAMLVLVK                   | Gln->pyro-Glu@N-term; Label:13C(6)15N(2)(K)@13                                                               | -0.00200367 | 1362.76526 | 682.3899 | 1362.76721 | 682.390869 | 2 | 19 | 20.5185 | 50.15 |
| 11 | 42   | 44    | 63.3 | EFEMP1_FlexIII | 99.0 | RGEQCVDIDECTIPPYCHQR            | Label:13C(6)15N(4)(R)@1; Propionamide(C)@5; Propionamide(C)@11; Propionamide(C)@17; Label:13C(6)15N(4)(R)@20 | 0.0018205   | 2594.15967 | 865.7272 | 2594.15796 | 865.726563 | 3 | 21 | 16.226  | 50.15 |
| 11 | 42   | 44    | 63.3 | EFEMP1_FlexIII | 99.0 | SGNENGEFYLR                     | Label:13C(6)15N(4)(R)@11                                                                                     | 0.00036753  | 1294.58203 | 648.2983 | 1294.58179 | 648.298157 | 2 | 15 | 16.8716 | 50.15 |
| 11 | 42   | 44    | 63.3 | EFEMP1_FlexIII | 99.0 | SQDTTEITITYTQCTDGYEWDVPR        | Propionamide(C)@13; Label:13C(6)15N(4)(R)@23                                                                 | -0.00582058 | 2817.18945 | 1409.602 | 2817.19507 | 1409.6     |   |    |         |       |

|    |    |    |                    |                                    |                                                                                                                                 |             |            |          |            |            |   |    |         |       |
|----|----|----|--------------------|------------------------------------|---------------------------------------------------------------------------------------------------------------------------------|-------------|------------|----------|------------|------------|---|----|---------|-------|
| 11 | 42 | 44 | 63.3 EFEMP1_FlexII | 99.0 CVCPVSNAMCR                   | Propionamide(C) @1; Propionamide(C) @3; Deamidated(N) @7; Propionamide(C) @10; Label:13C(6)15N(4)(R) @11                        | -0.00049323 | 1405.58472 | 703.7996 | 1405.58496 | 703.799805 | 2 | 13 | 15.6674 | 50.15 |
| 11 | 42 | 44 | 63.3 EFEMP1_FlexII | 99.0 CVCPVSNAMCR                   | Propionamide(C) @1; Propionamide(C) @3; Deamidated(N) @7; Propionamide(C) @10; Label:13C(6)15N(4)(R) @11                        | -0.00098151 | 1405.58411 | 703.7993 | 1405.58496 | 703.799805 | 2 | 13 | 15.7101 | 50.15 |
| 11 | 42 | 44 | 63.3 EFEMP1_FlexII | 99.0 CVCPVSNAMCR                   | Propionamide(C) @1; Propionamide(C) @3; Propionamide(C) @10; Label:13C(6)15N(4)(R) @11                                          | 0.000085461 | 1404.60193 | 703.3082 | 1404.60095 | 703.307739 | 2 | 14 | 15.7227 | 50.15 |
| 11 | 42 | 44 | 63.3 EFEMP1_FlexII | 99.0 CVCPVSNAMCR                   | Propionamide(C) @1; Propionamide(C) @3; Propionamide(C) @10; Label:13C(6)15N(4)(R) @11                                          | 0.00109875  | 1404.60205 | 703.3083 | 1404.60095 | 703.307739 | 2 | 12 | 15.7581 | 50.15 |
| 11 | 42 | 44 | 63.3 EFEMP1_FlexII | 99.0 CVCPVSNAMCR                   | Propionamide(C) @1; Propionamide(C) @3; Propionamide(C) @10; Label:13C(6)15N(4)(R) @11                                          | 0.00061046  | 1404.60144 | 703.308  | 1404.60095 | 703.307739 | 2 | 13 | 15.7959 | 50.15 |
| 11 | 42 | 44 | 63.3 EFEMP1_FlexII | 99.0 CVNHYGGYLCLPK                 | Propionamide(C) @1; Propionamide(C) @10; Label:13C(6)15N(2)(K) @13                                                              | 0.00042662  | 1615.77332 | 539.5984 | 1615.77307 | 539.598267 | 3 | 16 | 17.0284 | 50.15 |
| 11 | 42 | 44 | 63.3 EFEMP1_FlexII | 99.0 CVNHYGGYLCLPK                 | Propionamide(C) @1; Propionamide(C) @10; Label:13C(6)15N(2)(K) @13                                                              | 0.00042662  | 1615.77332 | 539.5984 | 1615.77307 | 539.598267 | 3 | 16 | 17.0486 | 50.15 |
| 11 | 42 | 44 | 63.3 EFEMP1_FlexII | 99.0 CVNHYGGYLCLPK                 | Propionamide(C) @1; Propionamide(C) @10; Label:13C(6)15N(2)(K) @13                                                              | -0.00226281 | 1615.77087 | 808.8927 | 1615.77307 | 808.893799 | 2 | 20 | 17.0562 | 50.15 |
| 11 | 42 | 44 | 63.3 EFEMP1_FlexII | 99.0 CVNHYGGYLCLPK                 | Propionamide(C) @1; Propionamide(C) @10; Label:13C(6)15N(2)(K) @13                                                              | -6.55E-05   | 1615.77307 | 808.8938 | 1615.77307 | 808.893799 | 2 | 19 | 17.1094 | 50.15 |
| 11 | 42 | 44 | 63.3 EFEMP1_FlexII | 99.0 CVNHYGGYLCLPK                 | Propionamide(C) @1; Propionamide(C) @10; Label:13C(6)15N(2)(K) @13                                                              | -0.00030581 | 1615.77283 | 539.5982 | 1615.77307 | 539.598267 | 3 | 13 | 17.1696 | 50.15 |
| 11 | 42 | 44 | 63.3 EFEMP1_FlexII | 99.0 CVNHYGGYLCLPK                 | Propionamide(C) @1; Deamidated(N) @3; Propionamide(C) @10; Label:13C(6)15N(2)(K) @13                                            | 0.00371746  | 1616.76099 | 539.9276 | 1616.75708 | 539.92627  | 3 | 14 | 17.3511 | 50.15 |
| 11 | 42 | 44 | 63.3 EFEMP1_FlexII | 99.0 CVNHYGGYLCLPK                 | Propionamide(C) @1; Deamidated(N) @3; Propionamide(C) @10; Label:13C(6)15N(2)(K) @13                                            | 0.00371746  | 1616.76099 | 539.9276 | 1616.75708 | 539.92627  | 3 | 14 | 17.3536 | 50.15 |
| 11 | 42 | 44 | 63.3 EFEMP1_FlexII | 99.0 CVNHYGGYLCLPK                 | Propionamide(C) @1; Propionamide(C) @10; Label:13C(6)15N(2)(K) @13                                                              | -0.00122134 | 1615.77185 | 539.5979 | 1615.77307 | 539.598267 | 3 | 15 | 26.6402 | 50.15 |
| 11 | 42 | 44 | 63.3 EFEMP1_FlexII | 99.0 CVNHYGGYLCLPK                 | Propionamide(C) @1; Propionamide(C) @10; Label:13C(6)15N(2)(K) @13                                                              | -0.00122134 | 1615.77185 | 539.5979 | 1615.77307 | 539.598267 | 3 | 13 | 26.6581 | 50.15 |
| 11 | 42 | 44 | 63.3 EFEMP1_FlexII | 99.0 DIDECDIVPDACK                 | Propionamide(C) @5; Propionamide(C) @12; Label:13C(6)15N(2)(K) @13                                                              | 0.00106105  | 1584.69031 | 793.3524 | 1584.68909 | 793.351807 | 2 | 18 | 16.9323 | 50.15 |
| 11 | 42 | 44 | 63.3 EFEMP1_FlexII | 99.0 DIDECDIVPDACK                 | Propionamide(C) @5; Propionamide(C) @12; Label:13C(6)15N(2)(K) @13                                                              | 0.00106105  | 1584.69031 | 793.3524 | 1584.68909 | 793.351807 | 2 | 18 | 16.9348 | 50.15 |
| 11 | 42 | 44 | 63.3 EFEMP1_FlexII | 99.0 DIDECDIVPDACK                 | Propionamide(C) @5; Propionamide(C) @12; Label:13C(6)15N(2)(K) @13                                                              | 0.00106105  | 1584.69031 | 793.3524 | 1584.68909 | 793.351807 | 2 | 18 | 16.9476 | 50.15 |
| 11 | 42 | 44 | 63.3 EFEMP1_FlexII | 99.0 DIDECDIVPDACK                 | Propionamide(C) @5; Propionamide(C) @12; Label:13C(6)15N(2)(K) @13                                                              | 0.00130519  | 1584.69043 | 793.3525 | 1584.68909 | 793.351807 | 2 | 18 | 16.9729 | 50.15 |
| 11 | 42 | 44 | 63.3 EFEMP1_FlexII | 99.0 DIDECDIVPDACK                 | Propionamide(C) @5; Propionamide(C) @12; Label:13C(6)15N(2)(K) @13                                                              | 0.00020655  | 1584.68933 | 793.3519 | 1584.68909 | 793.351807 | 2 | 14 | 26.6173 | 50.15 |
| 11 | 42 | 44 | 63.3 EFEMP1_FlexII | 99.0 EHIVDLEMLTVSSIGTFR            | Label:13C(6)15N(4)(R) @18                                                                                                       | -0.00780322 | 2056.04614 | 686.356  | 2056.05396 | 686.358582 | 3 | 21 | 19.6578 | 50.15 |
| 11 | 42 | 44 | 63.3 EFEMP1_FlexII | 99.0 EHIVDLEMLTVSSIGTFR            | Label:13C(6)15N(4)(R) @18                                                                                                       | -0.00780322 | 2056.04614 | 686.356  | 2056.05396 | 686.358582 | 3 | 21 | 19.6628 | 50.15 |
| 11 | 42 | 44 | 63.3 EFEMP1_FlexII | 99.0 EHIVDLEMLTVSSIGTFR            | Label:13C(6)15N(4)(R) @18                                                                                                       | -0.00780322 | 2056.04614 | 686.356  | 2056.05396 | 686.358582 | 3 | 21 | 19.6704 | 50.15 |
| 11 | 42 | 44 | 63.3 EFEMP1_FlexII | 99.0 EHIVDLEMLTVSSIGTFR            | Label:13C(6)15N(4)(R) @18                                                                                                       | 0.00104302  | 2056.05542 | 1029.035 | 2056.05396 | 1029.03418 | 2 | 25 | 19.6881 | 50.15 |
| 11 | 42 | 44 | 63.3 EFEMP1_FlexII | 99.0 EHIVDLEMLTVSSIGTFR            | Label:13C(6)15N(4)(R) @18                                                                                                       | 0.00104302  | 2056.05542 | 1029.035 | 2056.05396 | 1029.03418 | 2 | 25 | 19.6907 | 50.15 |
| 11 | 42 | 44 | 63.3 EFEMP1_FlexII | 99.0 EHIVDLEMLTVSSIGTFR            | Label:13C(6)15N(4)(R) @18                                                                                                       | 0.00104302  | 2056.05542 | 1029.035 | 2056.05396 | 1029.03418 | 2 | 24 | 19.6958 | 50.15 |
| 11 | 42 | 44 | 63.3 EFEMP1_FlexII | 99.0 EHIVDLEMLTVSSIGTFR            | Label:13C(6)15N(4)(R) @18                                                                                                       | -0.00359178 | 2056.05054 | 686.3574 | 2056.05396 | 686.358582 | 3 | 20 | 19.7134 | 50.15 |
| 11 | 42 | 44 | 63.3 EFEMP1_FlexII | 99.0 EHIVDLEMLTVSSIGTFR            | Label:13C(6)15N(4)(R) @18                                                                                                       | -0.00212694 | 2056.05151 | 686.3578 | 2056.05396 | 686.358582 | 3 | 16 | 19.7337 | 50.15 |
| 11 | 42 | 44 | 63.3 EFEMP1_FlexII | 99.0 EHIVDLEMLTVSSIGTFR            | Label:13C(6)15N(4)(R) @18                                                                                                       | -0.00164253 | 2056.05127 | 1029.033 | 2056.05396 | 1029.03418 | 2 | 25 | 19.7514 | 50.15 |
| 11 | 42 | 44 | 63.3 EFEMP1_FlexII | 99.0 EHIVDLEMLTVSSIGTFR            | Label:13C(6)15N(4)(R) @18                                                                                                       | 0.00629593  | 2056.0603  | 686.3607 | 2056.05396 | 686.358582 | 3 | 21 | 20.1703 | 50.15 |
| 11 | 42 | 44 | 63.3 EFEMP1_FlexII | 99.0 EHIVDLEMLTVSSIGTFR            | Label:13C(6)15N(4)(R) @18                                                                                                       | 0.00245071  | 2056.0564  | 686.3594 | 2056.05396 | 686.358582 | 3 | 20 | 26.5739 | 50.15 |
| 11 | 42 | 44 | 63.3 EFEMP1_FlexII | 99.0 EHIVDLEMLTVSSIGTFR            | Label:13C(6)15N(4)(R) @18                                                                                                       | 0.00245071  | 2056.0564  | 686.3594 | 2056.05396 | 686.358582 | 3 | 19 | 26.5764 | 50.15 |
| 11 | 42 | 44 | 63.3 EFEMP1_FlexII | 99.0 EHIVDLEMLTVSSIGTFR            | Label:13C(6)15N(4)(R) @18                                                                                                       | 0.00245071  | 2056.0564  | 686.3594 | 2056.05396 | 686.358582 | 3 | 19 | 26.584  | 50.15 |
| 11 | 42 | 44 | 63.3 EFEMP1_FlexII | 99.0 EHIVDLEMLTVSSIGTFR            | Label:13C(6)15N(4)(R) @18                                                                                                       | 0.00428176  | 2056.05811 | 686.36   | 2056.05396 | 686.358582 | 3 | 20 | 26.6097 | 50.15 |
| 11 | 42 | 44 | 63.3 EFEMP1_FlexII | 99.0 EHIVDLEMLTVSSIGTFR            | Label:13C(6)15N(4)(R) @18                                                                                                       | 0.00629593  | 2056.0603  | 686.3607 | 2056.05396 | 686.358582 | 3 | 18 | 27.085  | 50.15 |
| 11 | 42 | 44 | 63.3 EFEMP1_FlexII | 99.0 EHIVDLEMLTVSSIGTFR            | Label:13C(6)15N(4)(R) @18                                                                                                       | 0.00574661  | 2056.05957 | 686.3605 | 2056.05396 | 686.358582 | 3 | 13 | 27.1474 | 50.15 |
| 11 | 42 | 44 | 63.3 EFEMP1_FlexII | 99.0 FSCMCPQGYYQVVR                | Propionamide(C) @3; Propionamide(C) @5; Label:13C(6)15N(4)(R) @13                                                               | 0.00353709  | 1668.74841 | 835.3815 | 1668.745   | 835.379761 | 2 | 16 | 16.9653 | 50.15 |
| 11 | 42 | 44 | 63.3 EFEMP1_FlexII | 99.0 FSCMCPQGYYQVVR                | Propionamide(C) @3; Propionamide(C) @5; Label:13C(6)15N(4)(R) @13                                                               | 0.00353709  | 1668.74841 | 835.3815 | 1668.745   | 835.379761 | 2 | 16 | 16.9703 | 50.15 |
| 11 | 42 | 44 | 63.3 EFEMP1_FlexII | 99.0 FSCMCPQGYYQVVR                | Propionamide(C) @3; Propionamide(C) @5; Label:13C(6)15N(4)(R) @13                                                               | 0.00353709  | 1668.74841 | 835.3815 | 1668.745   | 835.379761 | 2 | 17 | 16.9881 | 50.15 |
| 11 | 42 | 44 | 63.3 EFEMP1_FlexII | 99.0 GSFACQCPPGYQK                 | Propionamide(C) @5; Propionamide(C) @7; Label:13C(6)15N(2)(K) @13                                                               | 0.00284025  | 1534.68164 | 768.3481 | 1534.67883 | 768.34668  | 2 | 17 | 15.5241 | 50.15 |
| 11 | 42 | 44 | 63.3 EFEMP1_FlexII | 99.0 GSFACQCPPGYQK                 | Propionamide(C) @5; Propionamide(C) @7; Label:13C(6)15N(2)(K) @13                                                               | 0.00284025  | 1534.68164 | 768.3481 | 1534.67883 | 768.34668  | 2 | 18 | 15.5392 | 50.15 |
| 11 | 42 | 44 | 63.3 EFEMP1_FlexII | 99.0 IPSNPSHR                      | Label:13C(6)15N(4)(R) @8                                                                                                        | 0.00275137  | 916.478149 | 306.5    | 916.475403 | 306.499085 | 3 | 6  | 8.9481  | 50.15 |
| 11 | 42 | 44 | 63.3 EFEMP1_FlexII | 99.0 IPSNPSHR                      | Label:13C(6)15N(4)(R) @8                                                                                                        | -6.01E-05   | 916.475464 | 459.245  | 916.475403 | 459.244995 | 2 | 6  | 9.0953  | 50.15 |
| 11 | 42 | 44 | 63.3 EFEMP1_FlexII | 99.0 IPSNPSHR                      | Label:13C(6)15N(4)(R) @8                                                                                                        | -0.00081919 | 916.474609 | 306.4988 | 916.475403 | 306.499085 | 3 | 6  | 9.0624  | 50.15 |
| 11 | 42 | 44 | 63.3 EFEMP1_FlexII | 99.0 IQCAAGYEQSEHNVCQDIDECTAGTHNCR | Propionamide(C) @3; Propionamide(C) @15; Propionamide(C) @21; Propionamide(C) @28; Label:13C(6)15N(4)(R) @29                    | -0.00434044 | 3488.44336 | 873.1181 | 3488.44775 | 873.119202 | 4 | 18 | 16.323  | 50.15 |
| 11 | 42 | 44 | 63.3 EFEMP1_FlexII | 99.0 IQCAAGYEQSEHNVCQDIDECTAGTHNCR | Propionamide(C) @3; Propionamide(C) @15; Propionamide(C) @21; Propionamide(C) @28; Label:13C(6)15N(4)(R) @29                    | 0.00713419  | 3488.45483 | 873.121  | 3488.44775 | 873.119202 | 4 | 15 | 16.358  | 50.15 |
| 11 | 42 | 44 | 63.3 EFEMP1_FlexII | 99.0 IQCAAGYEQSEHNVCQDIDECTAGTHNCR | Propionamide(C) @3; Deamidated(N) @13; Propionamide(C) @15; Propionamide(C) @21; Propionamide(C) @28; Label:13C(6)15N(4)(R) @29 | 0.0310511   | 3489.46118 | 1164.161 | 3489.43164 | 1164.15125 | 3 | 21 | 16.3831 | 50.15 |
| 11 | 42 | 44 | 63.3 EFEMP1_FlexII | 99.0 IQCAAGYEQSEHNVCQDIDECTAGTHNCR | Propionamide(C) @3; Propionamide(C) @15; Propionamide(C) @21; Propionamide(C) @28; Label:13C(6)15N(4)(R) @29                    | -0.00165489 | 3488.44605 | 873.1188 | 3488.44775 | 873.119202 | 4 | 15 | 16.401  | 50.15 |
| 11 | 42 | 44 | 63.3 EFEMP1_FlexII | 99.0 LNCEDIDECR                    | Propionamide(C) @3; Propionamide(C) @9; Label:13C(6)15N(4)(R) @10                                                               | -0.00045695 | 1360.56226 | 681.2884 | 1360.56262 | 681.288635 | 2 | 13 | 15.4211 | 50.15 |
| 11 | 42 | 44 | 63.3 EFEMP1_FlexII | 99.0 LNCEDIDECR                    | Propionamide(C) @3; Propionamide(C) @9; Label:13C(6)15N(4)(R) @10                                                               | -0.00045695 | 1360.56226 | 681.2884 | 1360.56262 | 681.288635 | 2 | 13 | 15.4388 | 50.15 |
| 11 | 42 | 44 | 63.3 EFEMP1_FlexII | 99.0 LNCEDIDECR                    | Propionamide(C) @3; Propionamide(C) @9; Label:13C(6)15N(4)(R) @10                                                               | 0.0001534   | 1360.56287 | 681.2887 | 1360.56262 | 681.288635 | 2 | 11 | 15.4687 | 50.15 |
| 11 | 42 | 44 | 63.3 EFEMP1_FlexII | 99.0 NNFVIR                        | Label:13C(6)15N(4)(R) @6                                                                                                        | -0.00095122 | 771.425903 | 386.7202 | 771.426697 | 386.720612 | 2 | 8  | 16.2509 | 50.15 |
| 11 | 42 | 44 | 63.3 EFEMP1_FlexII | 99.0 NNFVIR                        | Deamidated(N) @2; Label:13C(6)15N(4)(R) @6                                                                                      | -0.00034592 | 772.410461 | 387.2125 | 772.410706 | 387.212616 | 2 | 8  | 16.9627 | 50.15 |
| 11 | 42 | 44 | 63.3 EFEMP1_FlexII | 99.0 NPCQDPYILTPENR                | Propionamide(C) @3; Label:13C(6)15N(4)(R) @14                                                                                   | 0.00976642  | 1739.82752 | 870.921  | 1739.81763 | 870.916077 | 2 | 16 | 19.932  | 50.15 |
| 11 | 42 | 44 | 63.3 EFEMP1_FlexII | 99.0 NPCQDPYILTPENR                | Deamidated(N) @1; Propionamide(C) @3; Label:13C(6)15N(4)(R) @14                                                                 | 0.0257526   | 1740.82752 | 871.421  | 1740.80164 | 871.408081 | 2 | 13 | 17.0209 | 50.15 |
| 11 | 42 | 44 | 63.3 EFEMP1_FlexII | 99.0 NPCQDPYILTPENR                | Propionamide(C) @3; Label:13C(6)15N(4)(R) @14                                                                                   | 0.00415117  | 1739.8219  | 870.9182 | 1739.81763 | 870.916077 | 2 | 13 | 17.1119 | 50.15 |
| 11 | 42 | 44 | 63.3 EFEMP1_FlexII | 99.0 QTSPPVSAMLVLVK                | Label:13C(6)15N(2)(K) @13                                                                                                       | -0.0045971  | 1379.78931 | 690.9019 | 1379.79382 | 690.904175 | 2 | 14 | 19.5134 | 50.15 |
| 11 | 42 | 44 | 63.3 EFEMP1_FlexII | 99.0 QTSPPVSAMLVLVK                | Label:13C(6)15N(2)(K) @13                                                                                                       | -0.0037426  | 1379.79004 | 690.9023 | 1379.79382 | 690.904175 | 2 | 15 | 19.5362 | 50.15 |
| 11 | 42 | 44 | 63.3 EFEMP1_FlexII | 99.0 QTSPPVSAMLVLVK                | Label:13C(6)15N(2)(K) @13                                                                                                       | -0.00655022 | 1379.78723 | 690.9009 | 1379.79382 | 690.904175 | 2 | 14 | 19.5691 | 50.15 |
| 11 | 42 | 44 | 63.3 EFEMP1_FlexII | 99.0 QTSPPVSAMLVLVK                | Label:13C(6)15N(2)(K) @13                                                                                                       | -0.00655022 | 1379.78723 | 690.9009 | 1379.79382 | 690.904175 | 2 | 12 | 19.5818 | 50.15 |
| 11 | 42 | 44 | 63.3 EFEMP1_FlexII | 99.0 QTSPPVSAMLVLVK                | Gln->pyro-Glu @N-term; Label:13C(6)15N(2)(K) @13                                                                                | -0.00041676 | 1362.76685 | 682.3907 | 1362.76721 | 682.390869 | 2 | 11 | 19.6932 | 50.15 |
| 11 | 42 | 44 | 63.3 EFEMP1_FlexII | 99.0 QTSPPVSAMLVLVK                | Gln->pyro-Glu @N-term; Label:13C(6)15N(2)(K) @13                                                                                | -0.00200367 | 1362.76526 | 682.3899 | 1362.76721 | 682.390869 | 2 | 18 | 20.5108 | 50.15 |
| 11 | 42 | 44 | 63.3 EFEMP1_FlexII | 99.0 QTSPPVSAMLVLVK                | Gln->pyro-Glu @N-term; Label:13C(6)15N(2)(K) @13                                                                                | -0.0018816  | 1362.7655  | 682.39   | 136        |            |   |    |         |       |

|    |       |       |                     |                                                             |                                                                                                                                   |             |            |          |            |            |   |    |         |        |
|----|-------|-------|---------------------|-------------------------------------------------------------|-----------------------------------------------------------------------------------------------------------------------------------|-------------|------------|----------|------------|------------|---|----|---------|--------|
| 11 | 42    | 44    | 63.3 EFEMP1_FlexII  | 99.0 SGNENGEFYLR                                            | Label:13C(6)15N(4)(R)@11                                                                                                          | 0.00036753  | 1294.58203 | 648.2983 | 1294.58179 | 648.298157 | 2 | 13 | 16.8868 | 50.15  |
| 11 | 42    | 44    | 63.3 EFEMP1_FlexII  | 99.0 SGNENGEFYLR                                            | Label:13C(6)15N(4)(R)@11                                                                                                          | 0.00044896  | 1294.58228 | 648.2984 | 1294.58179 | 648.298157 | 2 | 12 | 16.9146 | 50.15  |
| 11 | 42    | 44    | 63.3 EFEMP1_FlexII  | 99.0 SGNENGEFYLR                                            | Deamidated(N)@5; Label:13C(6)15N(4)(R)@11                                                                                         | -0.00049203 | 1295.56531 | 648.7899 | 1295.5658  | 648.790161 | 2 | 14 | 17.1293 | 50.15  |
| 11 | 42    | 44    | 63.3 EFEMP1_FlexII  | 99.0 SGNENGEFYLR                                            | Deamidated(N)@5; Label:13C(6)15N(4)(R)@11                                                                                         | 0.00080575  | 1295.56665 | 648.7906 | 1295.5658  | 648.790161 | 2 | 11 | 26.5865 | 50.15  |
| 11 | 42    | 44    | 63.3 EFEMP1_FlexII  | 99.0 SQDTEETITYTQCTDGYEWDVPR                                | Deamidated(Q)@12; Propionamide(C)@13; Label:13C(6)15N(4)(R)@23                                                                    | 0.0301852   | 2818.20947 | 1410.112 | 2818.1792  | 1410.0968  | 2 | 17 | 18.1283 | 50.15  |
| 11 | 42    | 44    | 63.3 EFEMP1_FlexII  | 99.0 SQDTEETITYTQCTDGYEWDVPR                                | Propionamide(C)@13; Label:13C(6)15N(4)(R)@23                                                                                      | -0.0035584  | 2817.19141 | 940.0711 | 2817.19507 | 940.072327 | 3 | 21 | 18.1486 | 50.15  |
| 11 | 42    | 44    | 63.3 EFEMP1_FlexII  | 99.0 SQDTEETITYTQCTDGYEWDVPR                                | Propionamide(C)@13; Label:13C(6)15N(4)(R)@23                                                                                      | 0.00394894  | 2817.19898 | 940.0736 | 2817.19507 | 940.072327 | 3 | 21 | 18.179  | 50.15  |
| 11 | 42    | 44    | 63.3 EFEMP1_FlexII  | 99.0 SQDTEETITYTQCTDGYEWDVPR                                | Propionamide(C)@13; Label:13C(6)15N(4)(R)@23                                                                                      | 0.00394894  | 2817.19898 | 940.0736 | 2817.19507 | 940.072327 | 3 | 22 | 18.1892 | 50.15  |
| 11 | 42    | 44    | 63.3 EFEMP1_FlexII  | 99.0 SVPSDFIQIATTIYANTINTFR                                 | Deamidated(Q)@10; Label:13C(6)15N(4)(R)@23                                                                                        | 0.00855388  | 2610.32935 | 1306.172 | 2610.32056 | 1306.16748 | 2 | 18 | 20.3963 | 50.15  |
| 11 | 42    | 44    | 63.3 EFEMP1_FlexII  | 99.0 SVPSDFIQIATTIYANTINTFR                                 | Deamidated(Q)@8; Label:13C(6)15N(4)(R)@23                                                                                         | 0.0206427   | 2610.34106 | 871.121  | 2610.32056 | 871.114136 | 3 | 16 | 20.4015 | 50.15  |
| 11 | 42    | 44    | 63.3 EFEMP1_FlexII  | 99.0 SVPSDFIQIATTIYANTINTFR                                 | Label:13C(6)15N(4)(R)@23                                                                                                          | -0.00150801 | 2609.33496 | 870.7856 | 2609.33643 | 870.786133 | 3 | 19 | 20.4192 | 50.15  |
| 11 | 42    | 44    | 63.3 EFEMP1_FlexII  | 99.0 SVPSDFIQIATTIYANTINTFR                                 | Label:13C(6)15N(4)(R)@23                                                                                                          | 0.00038021  | 2609.3374  | 1305.676 | 2609.33643 | 1305.67554 | 2 | 22 | 20.4218 | 50.15  |
| 11 | 42    | 44    | 63.3 EFEMP1_FlexII  | 99.0 SVPSDFIQIATTIYANTINTFR                                 | Label:13C(6)15N(4)(R)@23                                                                                                          | -0.00150801 | 2609.33496 | 870.7856 | 2609.33643 | 870.786133 | 3 | 18 | 20.4243 | 50.15  |
| 11 | 42    | 44    | 63.3 EFEMP1_FlexII  | 99.0 SVPSDFIQIATTIYANTINTFR                                 | Label:13C(6)15N(4)(R)@23                                                                                                          | 0.00038021  | 2609.3374  | 1305.676 | 2609.33643 | 1305.67554 | 2 | 20 | 20.4269 | 50.15  |
| 11 | 42    | 44    | 63.3 EFEMP1_FlexII  | 99.0 SVPSDFIQIATTIYANTINTFR                                 | Label:13C(6)15N(4)(R)@23                                                                                                          | 0.00038021  | 2609.3374  | 1305.676 | 2609.33643 | 1305.67554 | 2 | 19 | 20.4472 | 50.15  |
| 11 | 42    | 44    | 63.3 EFEMP1_FlexII  | 99.0 SVPSDFIQIATTIYANTINTFR                                 | Label:13C(6)15N(4)(R)@23                                                                                                          | -0.00187422 | 2609.33472 | 870.7855 | 2609.33643 | 870.786133 | 3 | 17 | 20.4601 | 50.15  |
| 11 | 42    | 44    | 63.3 EFEMP1_FlexII  | 99.0 SVPSDFIQIATTIYANTINTFR                                 | Label:13C(6)15N(4)(R)@23                                                                                                          | -0.00297285 | 2609.3335  | 870.7851 | 2609.33643 | 870.786133 | 3 | 14 | 20.4804 | 50.15  |
| 11 | 42    | 44    | 63.3 EFEMP1_FlexII  | 99.0 SVPSDFIQIATTIYANTINTFR                                 | Label:13C(6)15N(4)(R)@23                                                                                                          | 0.0146053   | 2609.35132 | 870.791  | 2609.33643 | 870.786133 | 3 | 8  | 21.5258 | 50.15  |
| 11 | 42    | 44    | 63.3 EFEMP1_FlexII  | 99.0 SVPSDFIQIATTIYANTINTFR                                 | Deamidated(Q)@10; Label:13C(6)15N(4)(R)@23                                                                                        | 0.0206427   | 2610.34106 | 871.121  | 2610.32056 | 871.114136 | 3 | 12 | 26.5193 | 50.15  |
| 11 | 42    | 44    | 63.3 EFEMP1_FlexII  | 99.0 SVPSDFIQIATTIYANTINTFR                                 | Label:13C(6)15N(4)(R)@23                                                                                                          | 0.0146053   | 2609.35132 | 870.791  | 2609.33643 | 870.786133 | 3 | 9  | 26.5219 | 50.15  |
| 11 | 42    | 44    | 63.3 EFEMP1_FlexII  | 99.0 SVPSDFIQIATTIYANTINTFR                                 | Label:13C(6)15N(4)(R)@23                                                                                                          | -0.0136614  | 2609.323   | 870.7816 | 2609.33643 | 870.786133 | 3 | 18 | 20.4923 | 50.15  |
| 11 | 42    | 44    | 63.3 EFEMP1_FlexII  | 99.0 SVPSDFIQIATTIYANTINTFR                                 | Deamidated(Q)@8; Label:13C(6)15N(4)(R)@23                                                                                         | 0.0222262   | 2610.34277 | 871.1215 | 2610.32056 | 871.114136 | 3 | 18 | 20.4928 | 50.15  |
| 11 | 42    | 44    | 63.3 EFEMP1_FlexII  | 99.0 TAOIIVNNEQPQOETQPAEGTSGATTGVVAASSMSTGVLPGGGFVASAAAVAGP | Deamidated(Q)@16; Label:13C(6)15N(4)(R)@61                                                                                        | -0.0111713  | 5865.81885 | 1467.462 | 5865.83008 | 1467.46484 | 4 | 26 | 19.3481 | 50.15  |
| 11 | 42    | 44    | 63.3 EFEMP1_FlexII  | 99.0 TAOIIVNNEQPQOETQPAEGTSGATTGVVAASSMSTGVLPGGGFVASAAAVAGP | Deamidated(Q)@13; Label:13C(6)15N(4)(R)@61                                                                                        | -0.0080639  | 5865.82373 | 1174.172 | 5865.83008 | 1174.17334 | 5 | 23 | 19.3688 | 50.15  |
| 11 | 42    | 44    | 63.3 EFEMP1_FlexII  | 99.0 TAOIIVNNEQPQOETQPAEGTSGATTGVVAASSMSTGVLPGGGFVASAAAVAGP | Label:13C(6)15N(4)(R)@61                                                                                                          | -0.0110441  | 5864.83447 | 1467.216 | 5864.84619 | 1467.21875 | 4 | 22 | 19.3993 | 50.15  |
| 11 | 42    | 44    | 63.3 EFEMP1_FlexII  | 99.0 TAOIIVNNEQPQOETQPAEGTSGATTGVVAASSMSTGVLPGGGFVASAAAVAGP | Label:13C(6)15N(4)(R)@61                                                                                                          | 0.0128817   | 5864.85889 | 1467.222 | 5864.84619 | 1467.21875 | 4 | 26 | 19.483  | 50.15  |
| 11 | 42    | 44    | 63.3 EFEMP1_FlexII  | 99.0 TAOIIVNNEQPQOETQPAEGTSGATTGVVAASSMSTGVLPGGGFVASAAAVAGP | Deamidated(N)@8; Label:13C(6)15N(4)(R)@61                                                                                         | 0.0288679   | 5865.85889 | 1467.472 | 5865.83008 | 1467.46484 | 4 | 19 | 26.7402 | 50.15  |
| 11 | 42    | 44    | 63.3 EFEMP1_FlexII  | 99.0 TAOIIVNNEQPQOETQPAEGTSGATTGVVAASSMSTGVLPGGGFVASAAAVAGP | Label:13C(6)15N(4)(R)@61                                                                                                          | 0.0128817   | 5864.85889 | 1467.222 | 5864.84619 | 1467.21875 | 4 | 12 | 26.7789 | 50.15  |
| 11 | 42    | 44    | 63.3 EFEMP1_FlexII  | 99.0 TCOIDINECETTNECREDEMCWNYHGGFR                          | Propionamide(C)@2; Propionamide(C)@8; Deamidated(N)@12; Propionamide(C)@14; Label:13C(6)15N(4)(R)@15; Propionamide missed R-E @15 | 0.0219992   | 3687.45532 | 922.8711 | 3687.43311 | 922.865601 | 4 | 11 | 16.859  | 50.15  |
| 11 | 42    | 44    | 63.3 EFEMP1_FlexII  | 99.0 TCOIDINECETTNECREDEMCWNYHGGFR                          | Propionamide(C)@2; Propionamide(C)@8; Propionamide(C)@14; Label:13C(6)15N(4)(R)@15; Propionamide(C)@20; Label:13C(6)15N(4)(R)@15  | 0.00601301  | 3686.45532 | 922.6211 | 3686.44922 | 922.819568 | 4 | 12 | 16.8792 | 50.15  |
| 11 | 42    | 44    | 63.3 EFEMP1_FlexII  | 99.0 TCOIDINECETTNECREDEMCWNYHGGFR                          | Propionamide(C)@2; Propionamide(C)@8; Deamidated(N)@12; Propionamide(C)@14; Label:13C(6)15N(4)(R)@15; Propionamide missed R-E @15 | 0.0299299   | 3687.46411 | 1230.162 | 3687.43311 | 1230.15173 | 3 | 13 | 16.9602 | 50.15  |
| 11 | 42    | 44    | 63.3 EFEMP1_FlexII  | 99.0 TSSYLQCYQCVNEPGK                                       | Propionamide(C)@6; Propionamide(C)@10; Label:13C(6)15N(2)(K)@16                                                                   | 0.00020027  | 1968.88025 | 985.4474 | 1968.88013 | 985.447327 | 2 | 22 | 16.5265 | 50.15  |
| 11 | 42    | 44    | 63.3 EFEMP1_FlexII  | 99.0 TSSYLQCYQCVNEPGK                                       | Propionamide(C)@6; Propionamide(C)@10; Label:13C(6)15N(2)(K)@16                                                                   | 0.00020027  | 1968.88025 | 985.4474 | 1968.88013 | 985.447327 | 2 | 20 | 16.5391 | 50.15  |
| 11 | 42    | 44    | 63.3 EFEMP1_FlexII  | 99.0 TSSYLQCYQCVNEPGK                                       | Propionamide(C)@6; Propionamide(C)@10; Label:13C(6)15N(2)(K)@16                                                                   | -0.00028801 | 1968.87988 | 985.4472 | 1968.88013 | 985.447327 | 2 | 16 | 16.5693 | 50.15  |
| 11 | 42    | 44    | 63.3 EFEMP1_FlexII  | 99.0 YPTFLYK                                                | Label:13C(6)15N(2)(K)@7                                                                                                           | -0.00061447 | 938.498557 | 470.2566 | 938.498329 | 470.256928 | 2 | 9  | 17.7815 | 50.15  |
| 12 | 41.66 | 43.83 | 57.8 CEACAM5_FlexII | 99.0 AYVCGIQNSVSANR                                         | Propionamide(C)@4; Label:13C(6)15N(4)(R)@14                                                                                       | 0.00164538  | 1561.75635 | 521.5927 | 1561.75464 | 521.592163 | 3 | 19 | 15.983  | 162.25 |
| 12 | 41.66 | 43.83 | 57.8 CEACAM5_FlexII | 99.0 CETQNPVSAR                                             | Propionamide(C)@1; Label:13C(6)15N(4)(R)@10                                                                                       | -4.09E-05   | 1184.54822 | 593.2814 | 1184.54834 | 593.281433 | 2 | 14 | 13.8223 | 162.25 |
| 12 | 41.66 | 43.83 | 57.8 CEACAM5_FlexII | 99.0 EIYPNASLLIQNIQNDTGFFYTHVHK                             | Label:13C(6)15N(2)(K)@28                                                                                                          | -0.00286633 | 3237.74902 | 1080.257 | 3237.75293 | 1080.2583  | 3 | 21 | 20.4969 | 162.25 |
| 12 | 41.66 | 43.83 | 57.8 CEACAM5_FlexII | 99.0 EVLLLVHNLPHQLFGYSWYK                                   | Label:13C(6)15N(2)(K)@20                                                                                                          | -0.0162518  | 2463.30298 | 822.1083 | 2463.31934 | 822.11377  | 3 | 23 | 19.4894 | 162.25 |
| 12 | 41.66 | 43.83 | 57.8 CEACAM5_FlexII | 99.0 EVLLLVHNLPHQLFGYSWYKGER                                | Label:13C(6)15N(2)(K)@20; Label:13C(6)15N(4)(R)@23                                                                                | -0.0164209  | 2815.47681 | 939.4995 | 2815.49292 | 939.504883 | 3 | 20 | 19.4924 | 162.25 |
| 12 | 41.66 | 43.83 | 57.8 CEACAM5_FlexII | 99.0 INGIPOQHQTOLVFIK                                       | Label:13C(6)15N(4)(R)@16                                                                                                          | 0.00367474  | 1814.03308 | 908.0238 | 1814.02942 | 908.021973 | 2 | 21 | 17.3709 | 162.25 |
| 12 | 41.66 | 43.83 | 57.8 CEACAM5_FlexII | 99.0 TPINNNGTYACFVSNLATGR                                   | Propionamide(C)@11; Label:13C(6)15N(4)(R)@20                                                                                      | 0.0148005   | 2193.06616 | 732.0293 | 2193.05127 | 732.024364 | 3 | 20 | 18.6364 | 162.25 |
| 12 | 41.66 | 43.83 | 57.8 CEACAM5_FlexII | 99.0 LLLTASLLFWNPPTTAK                                      | Label:13C(6)15N(2)(K)@18                                                                                                          | -0.00637076 | 1994.12683 | 998.0707 | 1994.13318 | 998.073853 | 2 | 22 | 20.5097 | 162.25 |
| 12 | 41.66 | 43.83 | 57.8 CEACAM5_FlexII | 99.0 LTIESTPFNVAEKG                                         | Label:13C(6)15N(2)(K)@14                                                                                                          | 0.00204477  | 1512.7937  | 757.4041 | 1512.7915  | 757.403015 | 2 | 17 | 17.8514 | 162.25 |
| 12 | 41.66 | 43.83 | 57.8 CEACAM5_FlexII | 99.0 NSLGYTCQANSASGHSR                                      | Propionamide(C)@7; Label:13C(6)15N(4)(R)@18                                                                                       | 0.00113425  | 1946.85413 | 974.4343 | 1946.85291 | 974.433716 | 2 | 20 | 14.1791 | 162.25 |
| 12 | 41.66 | 43.83 | 57.8 CEACAM5_FlexII | 99.0 QIIQYVGTQQTADPGPAYSGR                                  | Gln->pyro-Glu@N-term                                                                                                              | -0.0164832  | 2159.08545 | 1080.55  | 2159.10107 | 1080.55786 | 2 | 22 | 19.6498 | 162.25 |
| 12 | 41.66 | 43.83 | 57.8 CEACAM5_FlexII | 99.0 RSDSVILNVLYGPDATISPLNTSYR                              | Label:13C(6)15N(4)(R)@1; Label:13C(6)15N(4)(R)@26                                                                                 | -0.00395824 | 2867.48901 | 956.837  | 2867.49316 | 956.838318 | 3 | 29 | 19.4032 | 162.25 |
| 12 | 41.66 | 43.83 | 57.8 CEACAM5_FlexII | 99.0 SDLVNEEATGQFR                                          | Label:13C(6)15N(4)(R)@13                                                                                                          | 0.0008052   | 1474.69373 | 738.3541 | 1474.69275 | 738.353638 | 2 | 18 | 16.4343 | 162.25 |
| 12 | 41.66 | 43.83 | 57.8 CEACAM5_FlexII | 99.0 SDFPTVLDLVLYGDPITPSDPSSYLSGANLNLSCHSASNPQYSWR          | Propionamide(C)@34; Label:13C(6)15N(4)(R)@47                                                                                      | -0.00733773 | 5098.41065 | 1275.61  | 5098.41699 | 1275.61157 | 4 | 22 | 19.6421 | 162.25 |
| 12 | 41.66 | 43.83 | 57.8 CEACAM5_FlexII | 99.0 SDSLVLNVLYGPDATISPLNTSYR                               | Label:13C(6)15N(4)(R)@25                                                                                                          | -0.0189577  | 2701.36523 | 1351.69  | 2701.38379 | 1351.69922 | 2 | 26 | 20.1655 | 162.25 |
| 12 | 41.66 | 43.83 | 57.8 CEACAM5_FlexII | 99.0 TITVSALPKPSSISSNKPVEDKDAVFTCEPEAONTTYLWWVNNQSLPVSPR    | Label:13C(6)15N(2)(K)@10; Label:13C(6)15N(2)(K)@19; Label:13C(6)15N(2)(K)@31; Label:13C(6)15N(4)(R)@24                            | -0.00191354 | 6006.0083  | 1202.209 | 6006.00879 | 1202.20898 | 5 | 17 | 18.7914 | 162.25 |
| 12 | 41.66 | 43.83 | 57.8 CEACAM5_FlexII | 99.0 DAVAFVTCEPETQDATYLWWVNNQSLPVSPR                        | Propionamide(C)@4; Deamidated(Q)@12; Label:13C(6)15N(4)(R)@30                                                                     | 0.014279    | 3518.64819 | 1173.89  | 3518.63281 | 1173.88489 | 3 | 18 | 20.0103 | 162.25 |
| 12 | 41.66 | 43.83 | 57.8 CEACAM5_FlexII | 99.0 YYPELPKPKPSSISSNKPVEDKDAVFTCEPETQDATYLWWVNNQSLPVSPR    | Label:13C(6)15N(2)(K)@7; Label:13C(6)15N(2)(K)@16; Label:13C(6)15N(2)(K)@21; Propionamide(C)@28; Deamidated(Q)@33; missed K-D@21  | 0.0406071   | 5851.91357 | 1171.39  | 5851.86572 | 1171.38037 | 5 | 17 | 18.7991 | 162.25 |
| 12 | 41.66 | 43.83 | 57.8 CEACAM5_FlexII | 99.0 AYVCGIQNSVSANR                                         | Propionamide(C)@4; Label:13C(6)15N(4)(R)@14                                                                                       | 0.00942368  | 1561.76404 | 781.8893 | 1561.75464 | 781.884583 | 2 | 19 | 15.9203 | 162.25 |
| 12 | 41.66 | 43.83 | 57.8 CEACAM5_FlexII | 99.0 AYVCGIQNSVSANR                                         | Propionamide(C)@4; Label:13C(6)15N(4)(R)@14                                                                                       | 0.00164538  | 1561.75635 | 521.5927 | 1561.75464 | 521.592163 | 3 | 19 | 15.9931 | 162.25 |
| 12 | 41.66 | 43.83 | 57.8 CEACAM5_FlexII | 99.0 AYVCGIQNSVSANR                                         | Propionamide(C)@4; Deamidated(N)@8; Label:13C(6)15N(4)(R)@14                                                                      | 0.00999485  | 1562.73962 | 782.3771 | 1562.73865 | 782.376587 | 2 | 18 | 15.8579 | 162.25 |
| 12 | 41.66 | 43.83 | 57.8 CEACAM5_FlexII | 99.0 AYVCGIQNSVSANR                                         | Propionamide(C)@4; Deamidated(N)@8; Label:13C(6)15N(4)(R)@14                                                                      | 0.00734252  | 1562.74585 | 782.3802 | 1562.73865 | 782.376587 | 2 | 18 | 16.3467 | 162.25 |
| 12 | 41.66 | 43.83 | 57.8 CEACAM5_FlexII | 99.0 AYVCGIQNSVSANR                                         | Propionamide(C)@4; Deamidated(N)@8; Label:13C(6)15N(4)(R)@14                                                                      | 0.00233763  | 1562.74085 | 782.3777 | 1562.73865 | 782.376587 | 2 | 17 | 15.9157 | 162.25 |
| 12 | 41.66 | 43.83 | 57.8 CEACAM5_FlexII | 99.0 AYVCGIQNSVSANR                                         | Propionamide(C)@4; Label:13C(6)15N(4)(R)@14                                                                                       | 0.00124496  | 1561.75586 | 781.8852 | 1561.75464 | 781.884583 | 2 | 15 | 16.0209 | 162.25 |
| 12 | 41.66 | 43.83 | 57.8 CEACAM5_FlexII | 99.0 EIYPNASLLIQNIQNDTGFFYTHVHK                             | Deamidated(N)@6; Label:13C(6)15N(2)(K)@28                                                                                         | 0.0139757   | 3238.75098 | 1080.591 | 3238.73682 | 1080.5863  |   |    |         |        |

|    |       |       |      |                 |      |                           |                                                                              |             |            |          |            |            |   |    |         |        |
|----|-------|-------|------|-----------------|------|---------------------------|------------------------------------------------------------------------------|-------------|------------|----------|------------|------------|---|----|---------|--------|
| 12 | 41.66 | 43.83 | 57.8 | CEACAM5_FlexIII | 99.0 | EIYPNASLLIQNIQNDTGFTLHVIK | Deamidated(Q) @ 12; Label: 13C(6)15N(2)(K) @ 28                              | -0.00873283 | 3238.72803 | 810.6893 | 3238.73682 | 810.691528 | 4 | 21 | 20.5106 | 162.25 |
| 12 | 41.66 | 43.83 | 57.8 | CEACAM5_FlexIII | 99.0 | EIYPNASLLIQNIQNDTGFTLHVIK | Label: 13C(6)15N(2)(K) @ 28                                                  | -0.0247181  | 3237.72803 | 810.4393 | 3237.75293 | 810.445496 | 4 | 23 | 20.5512 | 162.25 |
| 12 | 41.66 | 43.83 | 57.8 | CEACAM5_FlexIII | 99.0 | EIYPNASLLIQNIQNDTGFTLHVIK | Label: 13C(6)15N(2)(K) @ 28                                                  | -0.021056   | 3237.73169 | 810.4402 | 3237.75293 | 810.445496 | 4 | 21 | 20.5563 | 162.25 |
| 12 | 41.66 | 43.83 | 57.8 | CEACAM5_FlexIII | 99.0 | EIYPNASLLIQNIQNDTGFTLHVIK | Label: 13C(6)15N(2)(K) @ 28                                                  | -0.021056   | 3237.73169 | 810.4402 | 3237.75293 | 810.445496 | 4 | 19 | 20.5715 | 162.25 |
| 12 | 41.66 | 43.83 | 57.8 | CEACAM5_FlexIII | 99.0 | EIYPNASLLIQNIQNDTGFTLHVIK | Deamidated(N) @ 6; Label: 13C(6)15N(2)(K) @ 28                               | 0.0149205   | 3238.75098 | 1080.591 | 3238.73682 | 1080.5863  | 3 | 14 | 20.531  | 162.25 |
| 12 | 41.66 | 43.83 | 57.8 | CEACAM5_FlexIII | 99.0 | EIYPNASLLIQNIQNDTGFTLHVIK | Label: 13C(6)15N(2)(K) @ 28                                                  | -0.0209681  | 3237.7312  | 1080.251 | 3237.75293 | 1080.2583  | 3 | 17 | 20.47   | 162.25 |
| 12 | 41.66 | 43.83 | 57.8 | CEACAM5_FlexIII | 99.0 | EVLLLVHNLPOHLFGYSWYK      | Label: 13C(6)15N(2)(K) @ 20                                                  | -0.0153363  | 2463.30396 | 822.1086 | 2463.31934 | 822.11377  | 3 | 23 | 19.4616 | 162.25 |
| 12 | 41.66 | 43.83 | 57.8 | CEACAM5_FlexIII | 99.0 | EVLLLVHNLPOHLFGYSWYK      | Label: 13C(6)15N(2)(K) @ 20                                                  | -0.0153363  | 2463.30396 | 822.1086 | 2463.31934 | 822.11377  | 3 | 22 | 19.4641 | 162.25 |
| 12 | 41.66 | 43.83 | 57.8 | CEACAM5_FlexIII | 99.0 | EVLLLVHNLPOHLFGYSWYK      | Label: 13C(6)15N(2)(K) @ 20                                                  | -0.0153363  | 2463.30396 | 822.1086 | 2463.31934 | 822.11377  | 3 | 23 | 19.4666 | 162.25 |
| 12 | 41.66 | 43.83 | 57.8 | CEACAM5_FlexIII | 99.0 | EVLLLVHNLPOHLFGYSWYK      | Label: 13C(6)15N(2)(K) @ 20                                                  | -0.0144208  | 2463.30493 | 822.1089 | 2463.31934 | 822.11377  | 3 | 20 | 19.5302 | 162.25 |
| 12 | 41.66 | 43.83 | 57.8 | CEACAM5_FlexIII | 99.0 | EVLLLVHNLPOHLFGYSWYK      | Deamidated(N) @ 8; Label: 13C(6)15N(2)(K) @ 20                               | 0.00140822  | 2464.30542 | 1233.16  | 2464.30347 | 1233.15906 | 2 | 16 | 19.6244 | 162.25 |
| 12 | 41.66 | 43.83 | 57.8 | CEACAM5_FlexIII | 99.0 | EVLLLVHNLPOHLFGYSWYK      | Label: 13C(6)15N(2)(K) @ 20                                                  | -0.0151532  | 2463.3042  | 822.1087 | 2463.31934 | 822.11377  | 3 | 15 | 19.637  | 162.25 |
| 12 | 41.66 | 43.83 | 57.8 | CEACAM5_FlexIII | 99.0 | EVLLLVHNLPOHLFGYSWYKGER   | Deamidated(Q) @ 11; Label: 13C(6)15N(2)(K) @ 20; Label: 13C(6)15N(4)(R) @ 23 | -0.0103844  | 2816.4668  | 939.8295 | 2816.47681 | 939.832886 | 3 | 19 | 19.0378 | 162.25 |
| 12 | 41.66 | 43.83 | 57.8 | CEACAM5_FlexIII | 99.0 | EVLLLVHNLPOHLFGYSWYKGER   | Label: 13C(6)15N(2)(K) @ 20; Label: 13C(6)15N(4)(R) @ 23                     | 0.00375488  | 2815.49658 | 704.8814 | 2815.49292 | 704.880493 | 4 | 16 | 18.9745 | 162.25 |
| 12 | 41.66 | 43.83 | 57.8 | CEACAM5_FlexIII | 99.0 | EVLLLVHNLPOHLFGYSWYKGER   | Label: 13C(6)15N(2)(K) @ 20; Label: 13C(6)15N(4)(R) @ 23                     | 0.00375488  | 2815.49658 | 704.8814 | 2815.49292 | 704.880493 | 4 | 16 | 18.977  | 162.25 |
| 12 | 41.66 | 43.83 | 57.8 | CEACAM5_FlexIII | 99.0 | EVLLLVHNLPOHLFGYSWYKGER   | Label: 13C(6)15N(2)(K) @ 20; Label: 13C(6)15N(4)(R) @ 23                     | 0.00375488  | 2815.49658 | 704.8814 | 2815.49292 | 704.880493 | 4 | 16 | 18.982  | 162.25 |
| 12 | 41.66 | 43.83 | 57.8 | CEACAM5_FlexIII | 99.0 | EVLLLVHNLPOHLFGYSWYKGER   | Label: 13C(6)15N(2)(K) @ 20; Label: 13C(6)15N(4)(R) @ 23                     | 0.00375488  | 2815.49658 | 704.8814 | 2815.49292 | 704.880493 | 4 | 15 | 18.9997 | 162.25 |
| 12 | 41.66 | 43.83 | 57.8 | CEACAM5_FlexIII | 99.0 | INGIPQQHTQVLFIAK          | Label: 13C(6)15N(2)(K) @ 16                                                  | 0.00440716  | 1814.03381 | 908.0242 | 1814.02942 | 908.021973 | 2 | 22 | 17.343  | 162.25 |
| 12 | 41.66 | 43.83 | 57.8 | CEACAM5_FlexIII | 99.0 | INGIPQQHTQVLFIAK          | Label: 13C(6)15N(2)(K) @ 16                                                  | 0.00440716  | 1814.03381 | 908.0242 | 1814.02942 | 908.021973 | 2 | 22 | 17.3455 | 162.25 |
| 12 | 41.66 | 43.83 | 57.8 | CEACAM5_FlexIII | 99.0 | INGIPQQHTQVLFIAK          | Label: 13C(6)15N(2)(K) @ 16                                                  | 0.0012065   | 1814.0304  | 605.6841 | 1814.02942 | 605.683716 | 3 | 17 | 17.3025 | 162.25 |
| 12 | 41.66 | 43.83 | 57.8 | CEACAM5_FlexIII | 99.0 | INGIPQQHTQVLFIAK          | Label: 13C(6)15N(2)(K) @ 16                                                  | 0.0012065   | 1814.0304  | 605.6841 | 1814.02942 | 605.683716 | 3 | 17 | 17.305  | 162.25 |
| 12 | 41.66 | 43.83 | 57.8 | CEACAM5_FlexIII | 99.0 | INGIPQQHTQVLFIAK          | Label: 13C(6)15N(2)(K) @ 16                                                  | 0.0012065   | 1814.0304  | 605.6841 | 1814.02942 | 605.683716 | 3 | 17 | 17.3101 | 162.25 |
| 12 | 41.66 | 43.83 | 57.8 | CEACAM5_FlexIII | 99.0 | INGIPQQHTQVLFIAK          | Label: 13C(6)15N(2)(K) @ 16                                                  | 0.00157271  | 1814.03113 | 605.6843 | 1814.02942 | 605.683716 | 3 | 16 | 17.3632 | 162.25 |
| 12 | 41.66 | 43.83 | 57.8 | CEACAM5_FlexIII | 99.0 | INGIPQQHTQVLFIAK          | Label: 13C(6)15N(2)(K) @ 16                                                  | 0.00086712  | 1814.03027 | 908.0224 | 1814.02942 | 908.021973 | 2 | 15 | 17.4012 | 162.25 |
| 12 | 41.66 | 43.83 | 57.8 | CEACAM5_FlexIII | 99.0 | ITPNNNGTYACFVSNLATGR      | Propionamide(C) @ 11; Label: 13C(6)15N(4)(R) @ 20                            | 0.00121651  | 2193.05127 | 1097.533 | 2193.05127 | 1097.53284 | 2 | 19 | 18.591  | 162.25 |
| 12 | 41.66 | 43.83 | 57.8 | CEACAM5_FlexIII | 99.0 | ITPNNNGTYACFVSNLATGR      | Propionamide(C) @ 11; Label: 13C(6)15N(4)(R) @ 20                            | 0.00121651  | 2193.05127 | 1097.533 | 2193.05127 | 1097.53284 | 2 | 18 | 18.6037 | 162.25 |
| 12 | 41.66 | 43.83 | 57.8 | CEACAM5_FlexIII | 99.0 | ITPNNNGTYACFVSNLATGR      | Propionamide(C) @ 11; Label: 13C(6)15N(4)(R) @ 20                            | 0.00146065  | 2193.05347 | 1097.534 | 2193.05127 | 1097.53284 | 2 | 18 | 18.6188 | 162.25 |
| 12 | 41.66 | 43.83 | 57.8 | CEACAM5_FlexIII | 99.0 | ITPNNNGTYACFVSNLATGR      | Propionamide(C) @ 11; Label: 13C(6)15N(4)(R) @ 20                            | 0.00143382  | 2193.05249 | 732.0248 | 2193.05127 | 732.024353 | 3 | 18 | 18.6695 | 162.25 |
| 12 | 41.66 | 43.83 | 57.8 | CEACAM5_FlexIII | 99.0 | ITPNNNGTYACFVSNLATGR      | Propionamide(C) @ 11; Label: 13C(6)15N(4)(R) @ 20                            | 0.00243721  | 2193.05347 | 1097.534 | 2193.05127 | 1097.53284 | 2 | 16 | 18.6669 | 162.25 |
| 12 | 41.66 | 43.83 | 57.8 | CEACAM5_FlexIII | 99.0 | ITPNNNGTYACFVSNLATGR      | Deamidated(N) @ 6; Propionamide(C) @ 11; Label: 13C(6)15N(4)(R) @ 20         | 0.0206539   | 2194.05615 | 732.3593 | 2194.03516 | 732.352356 | 3 | 15 | 18.6492 | 162.25 |
| 12 | 41.66 | 43.83 | 57.8 | CEACAM5_FlexIII | 99.0 | ITPNNNGTYACFVSNLATGR      | Deamidated(N) @ 6; Propionamide(C) @ 11; Label: 13C(6)15N(4)(R) @ 20         | 0.00743613  | 2194.04346 | 1098.029 | 2194.03516 | 1098.0249  | 2 | 15 | 18.7457 | 162.25 |
| 12 | 41.66 | 43.83 | 57.8 | CEACAM5_FlexIII | 99.0 | LLLTASLLTFWNPPTTAK        | Label: 13C(6)15N(2)(K) @ 18                                                  | -0.00478384 | 1994.12842 | 998.0715 | 1994.13318 | 998.073853 | 2 | 21 | 20.5248 | 162.25 |
| 12 | 41.66 | 43.83 | 57.8 | CEACAM5_FlexIII | 99.0 | LLLTASLLTFWNPPTTAK        | Label: 13C(6)15N(2)(K) @ 18                                                  | -0.0115924  | 1994.1217  | 998.0681 | 1994.13318 | 998.073853 | 2 | 23 | 20.4649 | 162.25 |
| 12 | 41.66 | 43.83 | 57.8 | CEACAM5_FlexIII | 99.0 | LLLTASLLTFWNPPTTAK        | Label: 13C(6)15N(2)(K) @ 18                                                  | -0.0115924  | 1994.1217  | 998.0681 | 1994.13318 | 998.073853 | 2 | 24 | 20.4674 | 162.25 |
| 12 | 41.66 | 43.83 | 57.8 | CEACAM5_FlexIII | 99.0 | LLLTASLLTFWNPPTTAK        | Label: 13C(6)15N(2)(K) @ 18                                                  | -0.0115924  | 1994.1217  | 998.0681 | 1994.13318 | 998.073853 | 2 | 23 | 20.4828 | 162.25 |
| 12 | 41.66 | 43.83 | 57.8 | CEACAM5_FlexIII | 99.0 | LLLTASLLTFWNPPTTAK        | Label: 13C(6)15N(2)(K) @ 18                                                  | -0.0112262  | 1994.12183 | 998.0682 | 1994.13318 | 998.073853 | 2 | 24 | 20.5132 | 162.25 |
| 12 | 41.66 | 43.83 | 57.8 | CEACAM5_FlexIII | 99.0 | LLLTASLLTFWNPPTTAK        | Label: 13C(6)15N(2)(K) @ 18                                                  | -0.0273663  | 1994.10584 | 665.7092 | 1994.13318 | 665.718323 | 3 | 19 | 20.4928 | 162.25 |
| 12 | 41.66 | 43.83 | 57.8 | CEACAM5_FlexIII | 99.0 | LLLTASLLTFWNPPTTAK        | Label: 13C(6)15N(2)(K) @ 18                                                  | -0.013084   | 1994.12012 | 665.714  | 1994.13318 | 665.718323 | 3 | 19 | 20.4953 | 162.25 |
| 12 | 41.66 | 43.83 | 57.8 | CEACAM5_FlexIII | 99.0 | LLLTASLLTFWNPPTTAK        | Label: 13C(6)15N(2)(K) @ 18                                                  | -0.013084   | 1994.12012 | 665.714  | 1994.13318 | 665.718323 | 3 | 19 | 20.503  | 162.25 |
| 12 | 41.66 | 43.83 | 57.8 | CEACAM5_FlexIII | 99.0 | LLLTASLLTFWNPPTTAK        | Label: 13C(6)15N(2)(K) @ 18                                                  | -0.0102496  | 1994.12293 | 998.0687 | 1994.13318 | 998.073853 | 2 | 18 | 20.5639 | 162.25 |
| 12 | 41.66 | 43.83 | 57.8 | CEACAM5_FlexIII | 99.0 | LLLTASLLTFWNPPTTAK        | Label: 13C(6)15N(2)(K) @ 18                                                  | -0.0121685  | 1994.12109 | 665.7143 | 1994.13318 | 665.718323 | 3 | 17 | 20.5588 | 162.25 |
| 12 | 41.66 | 43.83 | 57.8 | CEACAM5_FlexIII | 99.0 | LTIESTFPNVAEGK            | Label: 13C(6)15N(2)(K) @ 14                                                  | 0.00204477  | 1512.7937  | 757.4041 | 1512.7915  | 757.403015 | 2 | 17 | 17.8488 | 162.25 |
| 12 | 41.66 | 43.83 | 57.8 | CEACAM5_FlexIII | 99.0 | LTIESTFPNVAEGK            | Label: 13C(6)15N(2)(K) @ 14                                                  | 0.00204477  | 1512.7937  | 757.4041 | 1512.7915  | 757.403015 | 2 | 16 | 17.8767 | 162.25 |
| 12 | 41.66 | 43.83 | 57.8 | CEACAM5_FlexIII | 99.0 | NSGLYTCQANNASAGHSR        | Propionamide(C) @ 7; Label: 13C(6)15N(4)(R) @ 18                             | 0.00345359  | 1946.85632 | 974.4354 | 1946.85291 | 974.433716 | 2 | 24 | 14.1058 | 162.25 |
| 12 | 41.66 | 43.83 | 57.8 | CEACAM5_FlexIII | 99.0 | NSGLYTCQANNASAGHSR        | Propionamide(C) @ 7; Label: 13C(6)15N(4)(R) @ 18                             | 0.00345359  | 1946.85632 | 974.4354 | 1946.85291 | 974.433716 | 2 | 25 | 14.1158 | 162.25 |
| 12 | 41.66 | 43.83 | 57.8 | CEACAM5_FlexIII | 99.0 | NSGLYTCQANNASAGHSR        | Propionamide(C) @ 7; Label: 13C(6)15N(4)(R) @ 18                             | 0.00019189  | 1946.85315 | 649.9583 | 1946.85291 | 649.958252 | 3 | 19 | 14.0982 | 162.25 |
| 12 | 41.66 | 43.83 | 57.8 | CEACAM5_FlexIII | 99.0 | NSGLYTCQANNASAGHSR        | Propionamide(C) @ 7; Label: 13C(6)15N(4)(R) @ 18                             | 0.00019189  | 1946.85315 | 649.9583 | 1946.85291 | 649.958252 | 3 | 19 | 14.0905 | 162.25 |
| 12 | 41.66 | 43.83 | 57.8 | CEACAM5_FlexIII | 99.0 | NSGLYTCQANNASAGHSR        | Propionamide(C) @ 7; Label: 13C(6)15N(4)(R) @ 18                             | 0.00019189  | 1946.85315 | 649.9583 | 1946.85291 | 649.958252 | 3 | 18 | 14.0931 | 162.25 |
| 12 | 41.66 | 43.83 | 57.8 | CEACAM5_FlexIII | 99.0 | NSGLYTCQANNASAGHSR        | Propionamide(C) @ 7; Label: 13C(6)15N(4)(R) @ 18                             | 0.0005581   | 1946.85327 | 649.9584 | 1946.85291 | 649.958252 | 3 | 17 | 14.2068 | 162.25 |
| 12 | 41.66 | 43.83 | 57.8 | CEACAM5_FlexIII | 99.0 | QIIGYVIGTQQATPGPAYSGR     | Label: 13C(6)15N(4)(R) @ 21                                                  | 0.00511789  | 2186.14136 | 1094.078 | 2186.13599 | 1094.0752  | 2 | 28 | 17.8184 | 162.25 |
| 12 | 41.66 | 43.83 | 57.8 | CEACAM5_FlexIII | 99.0 | QIIGYVIGTQQATPGPAYSGR     | Label: 13C(6)15N(4)(R) @ 21                                                  | 0.00511789  | 2186.14136 | 1094.078 | 2186.13599 | 1094.0752  | 2 | 27 | 17.821  | 162.25 |
| 12 | 41.66 | 43.83 | 57.8 | CEACAM5_FlexIII | 99.0 | QIIGYVIGTQQATPGPAYSGR     | Label: 13C(6)15N(4)(R) @ 21                                                  | 0.00338208  | 2186.1394  | 729.7204 | 2186.13599 | 729.719238 | 3 | 21 | 17.8235 | 162.25 |
| 12 | 41.66 | 43.83 | 57.8 | CEACAM5_FlexIII | 99.0 | QIIGYVIGTQQATPGPAYSGR     | Label: 13C(6)15N(4)(R) @ 21                                                  | 0.00338208  | 2186.1394  | 729.7204 | 2186.13599 | 729.719238 | 3 | 21 | 17.8261 | 162.25 |
| 12 | 41.66 | 43.83 | 57.8 | CEACAM5_FlexIII | 99.0 | QIIGYVIGTQQATPGPAYSGR     | Label: 13C(6)15N(4)(R) @ 21                                                  | 0.00511789  | 2186.14136 | 1094.078 | 2186.13599 | 1094.0752  | 2 | 27 | 17.8363 | 162.25 |
| 12 | 41.66 | 43.83 | 57.8 | CEACAM5_FlexIII | 99.0 | QIIGYVIGTQQATPGPAYSGR     | Label: 13C(6)15N(4)(R) @ 21                                                  | 0.00338208  | 2186.1394  | 729.7204 | 2186.13599 | 729.719238 | 3 | 22 | 17.8463 | 162.25 |
| 12 | 41.66 | 43.83 | 57.8 | CEACAM5_FlexIII | 99.0 | QIIGYVIGTQQATPGPAYSGR     | Label: 13C(6)15N(4)(R) @ 21                                                  | 0.00462961  | 2186.14136 | 1094.078 | 2186.13599 | 1094.0752  | 2 | 22 | 17.859  | 162.25 |
| 12 | 41.66 | 43.83 | 57.8 | CEACAM5_FlexIII | 99.0 | QIIGYVIGTQQATPGPAYSGR     | Label: 13C(6)15N(4)(R) @ 21                                                  | 0.00338208  | 2186.1394  | 729.7204 | 2186.13599 | 729.719238 | 3 | 20 | 17.8616 | 162.25 |
| 12 | 41.66 | 43.83 | 57.8 | CEACAM5_FlexIII |      |                           |                                                                              |             |            |          |            |            |   |    |         |        |

|    |       |       |                      |                                                           |                                                                                                                            |                    |             |            |            |            |            |    |         |         |        |
|----|-------|-------|----------------------|-----------------------------------------------------------|----------------------------------------------------------------------------------------------------------------------------|--------------------|-------------|------------|------------|------------|------------|----|---------|---------|--------|
| 12 | 41.66 | 43.83 | 57.8 CEACAM5_FlexIII | 99.0 QIIGYVIGTQQATPGPAYSGR                                | Label:13C(6)15N(4)(R)@21                                                                                                   | -9.69E-05          | 2186.13574  | 729.7192   | 2186.13599 | 729.719238 | 3          | 14 | 26.5863 | 162.25  |        |
| 12 | 41.66 | 43.83 | 57.8 CEACAM5_FlexIII | 99.0 QIIGYVIGTQQATPGPAYSGR                                | Deamidated(O)@1; Label:13C(6)15N(4)(R)@21                                                                                  | 0.00450157         | 2187.12329  | 1094.569   | 2187.11987 | 1094.56726 | 2          | 15 | 19.627  | 162.25  |        |
| 12 | 41.66 | 43.83 | 57.8 CEACAM5_FlexIII | 99.0 RSDSVILNVLYGPDAPTISPLNTSYR                           | Label:13C(6)15N(4)(R)@1; Label:13C(6)15N(4)(R)@26                                                                          | missed R-S@1       | -0.00395824 | 2867.48901 | 956.837    | 2867.49316 | 956.838318 | 3  | 29      | 19.3981 | 162.25 |
| 12 | 41.66 | 43.83 | 57.8 CEACAM5_FlexIII | 99.0 RSDSVILNVLYGPDAPTISPLNTSYR                           | Label:13C(6)15N(4)(R)@1; Label:13C(6)15N(4)(R)@26                                                                          | missed R-S@1       | -0.00395824 | 2867.48901 | 956.837    | 2867.49316 | 956.838318 | 3  | 26      | 19.4108 | 162.25 |
| 12 | 41.66 | 43.83 | 57.8 CEACAM5_FlexIII | 99.0 RSDSVILNVLYGPDAPTISPLNTSYR                           | Label:13C(6)15N(4)(R)@1; Label:13C(6)15N(4)(R)@26                                                                          | missed R-S@1       | -0.00395824 | 2867.48901 | 956.837    | 2867.49316 | 956.838318 | 3  | 28      | 19.426  | 162.25 |
| 12 | 41.66 | 43.83 | 57.8 CEACAM5_FlexIII | 99.0 RSDSVILNVLYGPDAPTISPLNTSYR                           | Label:13C(6)15N(4)(R)@1; Deamidated(N)@8; Label:13C(6)15N(4)(R)@26                                                         | missed R-S@1       | 0.00790345  | 2868.48535 | 1435.25    | 2868.4773  | 1435.24585 | 2  | 21      | 19.5148 | 162.25 |
| 12 | 41.66 | 43.83 | 57.8 CEACAM5_FlexIII | 99.0 SDLVNEEATGQFR                                        | Label:13C(6)15N(4)(R)@13                                                                                                   | 0.0008052          | 1474.69373  | 738.3541   | 1474.69275 | 738.353638 | 2          | 18 | 16.4318 | 162.25  |        |
| 12 | 41.66 | 43.83 | 57.8 CEACAM5_FlexIII | 99.0 SDLVNEEATGQFR                                        | Label:13C(6)15N(4)(R)@13                                                                                                   | 0.00019485         | 1474.69312  | 738.3538   | 1474.69275 | 738.353638 | 2          | 17 | 16.4596 | 162.25  |        |
| 12 | 41.66 | 43.83 | 57.8 CEACAM5_FlexIII | 99.0 SDLVNEEATGQFR                                        | Label:13C(6)15N(4)(R)@13                                                                                                   | 0.00202591         | 1474.69482  | 738.3547   | 1474.69275 | 738.353638 | 2          | 16 | 16.9645 | 162.25  |        |
| 12 | 41.66 | 43.83 | 57.8 CEACAM5_FlexIII | 99.0 SDLVNEEATGQFR                                        | Label:13C(6)15N(4)(R)@13                                                                                                   | -0.00883836        | 1474.68384  | 738.3492   | 1474.69275 | 738.353638 | 2          | 11 | 27.067  | 162.25  |        |
| 12 | 41.66 | 43.83 | 57.8 CEACAM5_FlexIII | 99.0 SDLVNEEATGQFR                                        | Label:13C(6)15N(4)(R)@13                                                                                                   | -0.00078171        | 1474.69202  | 738.3533   | 1474.69275 | 738.353638 | 2          | 15 | 26.5455 | 162.25  |        |
| 12 | 41.66 | 43.83 | 57.8 CEACAM5_FlexIII | 99.0 SDLVNEEATGQFR                                        | Label:13C(6)15N(4)(R)@13                                                                                                   | -0.00078171        | 1474.69202  | 738.3533   | 1474.69275 | 738.353638 | 2          | 15 | 26.5481 | 162.25  |        |
| 12 | 41.66 | 43.83 | 57.8 CEACAM5_FlexIII | 99.0 SDLVNEEATGQFR                                        | Label:13C(6)15N(4)(R)@13                                                                                                   | -4.93E-05          | 1474.69263  | 738.3536   | 1474.69275 | 738.353638 | 2          | 14 | 16.4972 | 162.25  |        |
| 12 | 41.66 | 43.83 | 57.8 CEACAM5_FlexIII | 99.0 SDLVNEEATGQFR                                        | Label:13C(6)15N(4)(R)@13                                                                                                   | -0.00078171        | 1474.69202  | 738.3533   | 1474.69275 | 738.353638 | 2          | 14 | 26.5558 | 162.25  |        |
| 12 | 41.66 | 43.83 | 57.8 CEACAM5_FlexIII | 99.0 SDPVTLDVLYGPDTPPIISPPDSSYLSGANLNLSCHSASNPSPQYSWR     | Propionamide(C)@34; Label:13C(6)15N(4)(R)@47                                                                               | -0.0254041         | 5098.39063  | 1275.605   | 5098.41699 | 1275.61157 | 4          | 18 | 19.5581 | 162.25  |        |
| 12 | 41.66 | 43.83 | 57.8 CEACAM5_FlexIII | 99.0 SDPVTLDVLYGPDTPPIISPPDSSYLSGANLNLSCHSASNPSPQYSWR     | Propionamide(C)@34; Label:13C(6)15N(4)(R)@47                                                                               | -0.0273573         | 5098.39063  | 1275.605   | 5098.41699 | 1275.61157 | 4          | 18 | 19.5964 | 162.25  |        |
| 12 | 41.66 | 43.83 | 57.8 CEACAM5_FlexIII | 99.0 SDPVTLDVLYGPDTPPIISPPDSSYLSGANLNLSCHSASNPSPQYSWR     | Deamidated(N)@29; Propionamide(C)@34; Label:13C(6)15N(4)(R)@47                                                             | 0.00864753         | 5099.41065  | 1275.86    | 5099.40088 | 1275.85754 | 4          | 18 | 19.4971 | 162.25  |        |
| 12 | 41.66 | 43.83 | 57.8 CEACAM5_FlexIII | 99.0 SDSVILNVLYGPDAPTISPLNTSYR                            | Deamidated(N)@7; Label:13C(6)15N(4)(R)@25                                                                                  | -0.00297249        | 2702.36523  | 1352.19    | 2702.36792 | 1352.19116 | 2          | 22 | 20.1603 | 162.25  |        |
| 12 | 41.66 | 43.83 | 57.8 CEACAM5_FlexIII | 99.0 SDSVILNVLYGPDAPTISPLNTSYR                            | Label:13C(6)15N(4)(R)@25                                                                                                   | -0.012759          | 2701.37109  | 901.4643   | 2701.38379 | 901.468567 | 3          | 24 | 20.1706 | 162.25  |        |
| 12 | 41.66 | 43.83 | 57.8 CEACAM5_FlexIII | 99.0 SDSVILNVLYGPDAPTISPLNTSYR                            | Label:13C(6)15N(4)(R)@25                                                                                                   | -0.012759          | 2701.37109  | 901.4643   | 2701.38379 | 901.468567 | 3          | 23 | 20.1731 | 162.25  |        |
| 12 | 41.66 | 43.83 | 57.8 CEACAM5_FlexIII | 99.0 SDSVILNVLYGPDAPTISPLNTSYR                            | Deamidated(N)@7; Label:13C(6)15N(4)(R)@25                                                                                  | 0.0084753          | 2702.37622  | 901.7994   | 2702.36792 | 901.79657  | 3          | 19 | 20.1577 | 162.25  |        |
| 12 | 41.66 | 43.83 | 57.8 CEACAM5_FlexIII | 99.0 TITVSAELPKPSISNNKSPKVEDKDAVAFTCEPAQNNTYLVWVGQSLVPSPR | Label:13C(6)15N(2)(K)@10; Label:13C(6)15N(2)(K)@19; Label:13C(6)15N(2)(K)@24; Propionamide(C)@31; Label:13C(6)15N(4)(R)@24 | -0.00193154        | 6006.0083   | 1202.209   | 6006.00879 | 1202.20898 | 5          | 17 | 18.7889 | 162.25  |        |
| 12 | 41.66 | 43.83 | 57.8 CEACAM5_FlexIII | 99.0 YPTFLYK                                              | Label:13C(6)15N(2)(K)@7                                                                                                    | cleaved I-Y@N-term | -0.00061447 | 938.498657 | 470.2566   | 938.499329 | 470.256928 | 2  | 9       | 17.7815 | 162.25 |
| 13 | 39.31 | 41.31 | 63.5 CAMK2D_FlexIII  | 99.0 AGAYDFPSPEDWTVTPEAK                                  | Label:13C(6)15N(2)(K)@19                                                                                                   | 0.0146768          | 2087.97144  | 1044.993   | 2087.95679 | 1044.9856  | 2          | 19 | 18.4195 | 95.69   |        |
| 13 | 39.31 | 41.31 | 63.5 CAMK2D_FlexIII  | 99.0 DLKPENLLASK                                          | Label:13C(6)15N(2)(K)@3; Label:13C(6)15N(2)(K)@12                                                                          | 0.00152377         | 1355.80103  | 678.9078   | 1355.79956 | 678.907044 | 2          | 17 | 17.6742 | 95.69   |        |
| 13 | 39.31 | 41.31 | 63.5 CAMK2D_FlexIII  | 99.0 ESTESSNTTIEDVDK                                      | Label:13C(6)15N(2)(K)@16                                                                                                   | 0.00268718         | 1790.78125  | 896.3979   | 1790.77856 | 896.396545 | 2          | 19 | 14.89   | 95.69   |        |
| 13 | 39.31 | 41.31 | 63.5 CAMK2D_FlexIII  | 99.0 FTDEYQLFEELGK                                        | Label:13C(6)15N(2)(K)@13                                                                                                   | -0.00689704        | 1625.76343  | 813.889    | 1625.77051 | 813.892517 | 2          | 20 | 19.2024 | 95.69   |        |
| 13 | 39.31 | 41.31 | 63.5 CAMK2D_FlexIII  | 99.0 GAILTTMLATR                                          | Label:13C(6)15N(4)(R)@11                                                                                                   | -0.00073584        | 1156.65064  | 579.3326   | 1156.65137 | 579.332947 | 2          | 14 | 18.5312 | 95.69   |        |
| 13 | 39.31 | 41.31 | 63.5 CAMK2D_FlexIII  | 99.0 ICDPGLTAFEPEALGNLVGMDFHR                             | Propionamide(C)@2; Label:13C(6)15N(4)(R)@25                                                                                | -0.00845103        | 2811.31519  | 938.1123   | 2811.32349 | 938.115112 | 3          | 27 | 20.2412 | 95.69   |        |
| 13 | 39.31 | 41.31 | 63.5 CAMK2D_FlexIII  | 99.0 LKGAITTTMLATR                                        | Label:13C(6)15N(2)(K)@2; Label:13C(6)15N(4)(R)@13                                                                          | missed K-G@2       | -0.00107211 | 1405.84351 | 469.6218   | 1405.8446  | 469.622131 | 3  | 14      | 18.1411 | 95.69  |
| 13 | 39.31 | 41.31 | 63.5 CAMK2D_FlexIII  | 99.0 LTQYMDGSGMPK                                         | Label:13C(6)15N(2)(K)@12                                                                                                   | 0.00085713         | 1334.60986  | 668.3122   | 1334.60901 | 668.311768 | 2          | 14 | 16.2932 | 95.69   |        |
| 13 | 39.31 | 41.31 | 63.5 CAMK2D_FlexIII  | 99.0 SGSPVTPIKYPTFLYK                                     | Label:13C(6)15N(2)(K)@9; Label:13C(6)15N(2)(K)@16                                                                          | missed K-Y@9       | 0.00505653  | 1813.00464 | 907.5096   | 1812.99963 | 907.507141 | 2  | 20      | 18.1985 | 95.69  |
| 13 | 39.31 | 41.31 | 63.5 CAMK2D_FlexIII  | 99.0 SNKPIHTILNPVHVHLVGDDAACIAYIR                         | Label:13C(6)15N(2)(K)@3; Propionamide(C)@23; Label:13C(6)15N(4)(R)@28                                                      | -0.00201392        | 3168.69653  | 793.1814   | 3168.69849 | 793.181885 | 4          | 21 | 17.611  | 95.69   |        |
| 13 | 39.31 | 41.31 | 63.5 CAMK2D_FlexIII  | 99.0 VTEQLIEAINNGDFEAYTK                                  | Label:13C(6)15N(2)(K)@19                                                                                                   | -0.0163447         | 2162.0459   | 721.6893   | 2162.06226 | 721.694702 | 3          | 20 | 19.1035 | 95.69   |        |
| 13 | 39.31 | 41.31 | 63.5 CAMK2D_FlexIII  | 99.0 EYSEADASHCQIQLESVNVHCHLNGIVHR                        | Propionamide(C)@11; Propionamide(C)@22; Deamidated(N)@25; Label:13C(6)15N(4)(R)@30                                         | -0.00779407        | 3617.6582   | 603.9503   | 3617.66553 | 603.951538 | 6          | 14 | 19.0783 | 95.69   |        |
| 13 | 39.31 | 41.31 | 63.5 CAMK2D_FlexIII  | 99.0 AGAYDFPSPEDWTVTPEAK                                  | Label:13C(6)15N(2)(K)@19                                                                                                   | 0.00369042         | 2087.96143  | 1044.988   | 2087.95679 | 1044.9856  | 2          | 14 | 18.48   | 95.69   |        |
| 13 | 39.31 | 41.31 | 63.5 CAMK2D_FlexIII  | 99.0 DLKPENLLASK                                          | Label:13C(6)15N(2)(K)@3; Label:13C(6)15N(2)(K)@12                                                                          | 0.00726111         | 1355.80064  | 678.9106   | 1355.79956 | 678.907044 | 2          | 16 | 17.6691 | 95.69   |        |
| 13 | 39.31 | 41.31 | 63.5 CAMK2D_FlexIII  | 99.0 DLKPENLLASK                                          | Label:13C(6)15N(2)(K)@3; Label:13C(6)15N(2)(K)@12                                                                          | 0.00115755         | 1355.80066  | 678.9076   | 1355.79956 | 678.907044 | 2          | 16 | 17.7216 | 95.69   |        |
| 13 | 39.31 | 41.31 | 63.5 CAMK2D_FlexIII  | 99.0 DLKPENLLASK                                          | Label:13C(6)15N(2)(K)@3; Label:13C(6)15N(2)(K)@12                                                                          | -0.00262326        | 1355.797    | 452.9396   | 1355.79956 | 452.94046  | 3          | 15 | 17.7043 | 95.69   |        |
| 13 | 39.31 | 41.31 | 63.5 CAMK2D_FlexIII  | 99.0 DLKPENLLASK                                          | Label:13C(6)15N(2)(K)@3; Label:13C(6)15N(2)(K)@12                                                                          | -0.00262326        | 1355.797    | 452.9396   | 1355.79956 | 452.94046  | 3          | 15 | 17.7067 | 95.69   |        |
| 13 | 39.31 | 41.31 | 63.5 CAMK2D_FlexIII  | 99.0 DLKPENLLASK                                          | Label:13C(6)15N(2)(K)@3; Label:13C(6)15N(2)(K)@12                                                                          | -0.00262326        | 1355.797    | 452.9396   | 1355.79956 | 452.94046  | 3          | 15 | 17.714  | 95.69   |        |
| 13 | 39.31 | 41.31 | 63.5 CAMK2D_FlexIII  | 99.0 ESTESSNTTIEDVDK                                      | Label:13C(6)15N(2)(K)@16                                                                                                   | 0.00329753         | 1790.78186  | 896.3982   | 1790.77856 | 896.396545 | 2          | 18 | 14.9834 | 95.69   |        |
| 13 | 39.31 | 41.31 | 63.5 CAMK2D_FlexIII  | 99.0 EYSEADASHCQIQLESVNVHCHLNGIVHR                        | Propionamide(C)@11; Deamidated(N)@20; Propionamide(C)@22; Label:13C(6)15N(4)(R)@30                                         | 0.0338254          | 3617.69946  | 905.4321   | 3617.66553 | 905.423645 | 4          | 14 | 19.0303 | 95.69   |        |
| 13 | 39.31 | 41.31 | 63.5 CAMK2D_FlexIII  | 99.0 FTDEYQLFEELGK                                        | Label:13C(6)15N(2)(K)@13                                                                                                   | -0.00689704        | 1625.76343  | 813.889    | 1625.77051 | 813.892517 | 2          | 19 | 19.2075 | 95.69   |        |
| 13 | 39.31 | 41.31 | 63.5 CAMK2D_FlexIII  | 99.0 FTDEYQLFEELGK                                        | Label:13C(6)15N(2)(K)@13                                                                                                   | -0.00689704        | 1625.76343  | 813.889    | 1625.77051 | 813.892517 | 2          | 19 | 19.2177 | 95.69   |        |
| 13 | 39.31 | 41.31 | 63.5 CAMK2D_FlexIII  | 99.0 FTDEYQLFEELGK                                        | Label:13C(6)15N(2)(K)@13                                                                                                   | -0.00202594        | 1617.75427  | 809.8844   | 1617.75623 | 809.885376 | 2          | 19 | 19.3496 | 95.69   |        |
| 13 | 39.31 | 41.31 | 63.5 CAMK2D_FlexIII  | 99.0 FTDEYQLFEELGK                                        | Label:13C(6)15N(2)(K)@13                                                                                                   | -0.00189213        | 1625.76843  | 813.8915   | 1625.77051 | 813.892517 | 2          | 16 | 19.7164 | 95.69   |        |
| 13 | 39.31 | 41.31 | 63.5 CAMK2D_FlexIII  | 99.0 FTDEYQLFEELGK                                        | Label:13C(6)15N(2)(K)@13                                                                                                   | -0.00616461        | 1625.76428  | 813.8894   | 1625.77051 | 813.892517 | 2          | 15 | 19.2354 | 95.69   |        |
| 13 | 39.31 | 41.31 | 63.5 CAMK2D_FlexIII  | 99.0 GAILTTMLATR                                          | Label:13C(6)15N(4)(R)@11                                                                                                   | -0.00574076        | 1156.64563  | 579.3301   | 1156.65137 | 579.332947 | 2          | 14 | 18.4957 | 95.69   |        |
| 13 | 39.31 | 41.31 | 63.5 CAMK2D_FlexIII  | 99.0 ICDPGLTAFEPEALGNLVGMDFHR                             | Propionamide(C)@2; Label:13C(6)15N(4)(R)@25                                                                                | -0.00112677        | 2811.32227  | 938.1147   | 2811.32349 | 938.115112 | 3          | 27 | 20.2665 | 95.69   |        |
| 13 | 39.31 | 41.31 | 63.5 CAMK2D_FlexIII  | 99.0 ICDPGLTAFEPEALGNLVGMDFHR                             | Propionamide(C)@2; Label:13C(6)15N(4)(R)@25                                                                                | -0.00112677        | 2811.32227  | 938.1147   | 2811.32349 | 938.115112 | 3          | 24 | 20.2742 | 95.69   |        |
| 13 | 39.31 | 41.31 | 63.5 CAMK2D_FlexIII  | 99.0 ICDPGLTAFEPEALGNLVGMDFHR                             | Propionamide(C)@2; Label:13C(6)15N(4)(R)@25                                                                                | -0.00094366        | 2811.32251  | 938.1148   | 2811.32349 | 938.115112 | 3          | 23 | 20.2996 | 95.69   |        |
| 13 | 39.31 | 41.31 | 63.5 CAMK2D_FlexIII  | 99.0 ICDPGLTAFEPEALGNLVGMDFHR                             | Propionamide(C)@2; Label:13C(6)15N(4)(R)@25                                                                                | 0.0108396          | 2811.33447  | 703.8409   | 2811.32349 | 703.838135 | 4          | 21 | 20.3149 | 95.69   |        |
| 13 | 39.31 | 41.31 | 63.5 CAMK2D_FlexIII  | 99.0 ICDPGLTAFEPEALGNLVGMDFHR                             | Propionamide(C)@2; Label:13C(6)15N(4)(R)@25                                                                                | -0.00209994        | 2811.32129  | 703.8376   | 2811.32349 | 703.838135 | 4          | 21 | 20.4063 | 95.69   |        |
| 13 | 39.31 | 41.31 | 63.5 CAMK2D_FlexIII  | 99.0 ICDPGLTAFEPEALGNLVGMDFHR                             | Propionamide(C)@2; Label:13C(6)15N(4)(R)@25                                                                                | 0.0125418          | 2811.33545  | 1406.675   | 2811.32349 | 1406.66907 | 2          | 19 | 20.4265 | 95.69   |        |
| 13 | 39.31 | 41.31 | 63.5 CAMK2D_FlexIII  | 99.0 ICDPGLTAFEPEALGNLVGMDFHR                             | Propionamide(C)@2; Deamidated(N)@16; Label:13C(6)15N(4)(R)@25                                                              | 0.0276204          | 2812.33496  | 938.4523   | 2812.30762 | 938.443115 | 3          | 17 | 20.2386 | 95.69   |        |
| 13 | 39.31 | 41.31 | 63.5 CAMK2D_FlexIII  | 99.0 ICDPGLTAFEPEALGNLVGMDFHR                             | Propionamide(C)@2; Deamidated(N)@16; Label:13C(6)15N(4)(R)@25                                                              | 0.0285325          | 2812.33545  | 1407.175   | 2812.30762 | 1407.16101 | 2          | 17 | 20.3733 | 95.69   |        |
| 13 | 39.31 | 41.31 | 63.5 CAMK2D_FlexIII  | 99.0 ICDPGLTAFEPEALGNLVGMDFHR                             | Propionamide(C)@2; Deamidated(N)@16; Label:13C(6)15N(4)(R)@25                                                              | 0.0268303          | 2812.33447  | 704.0909   | 2812.30762 | 704.084168 | 4          | 16 | 20.3579 | 95.69   |        |
| 13 | 39.31 | 41.31 | 63.5 CAMK2D_FlexIII  | 99.0 LKGAITTTMLATR                                        | Label:13C(6)15N(2)(K)@2; Label:13C(6)15N(4)(R)@13                                                                          | missed K-G@2       | -0.00107211 | 140        |            |            |            |    |         |         |        |

|    |       |       |                    |                                 |                                                                                                   |                |             |            |          |            |            |   |    |         |        |
|----|-------|-------|--------------------|---------------------------------|---------------------------------------------------------------------------------------------------|----------------|-------------|------------|----------|------------|------------|---|----|---------|--------|
| 13 | 39.31 | 41.31 | 63.5 CAMK2D_FlexII | 99.0 VTEQLIEAINNGDFEAYTK        | Label: 13C(6)15N(2)(K) @ 19                                                                       |                | 0.0097141   | 2162.07129 | 1082.043 | 2162.06226 | 1082.03845 | 2 | 22 | 18.8835 | 95.69  |
| 13 | 39.31 | 41.31 | 63.5 CAMK2D_FlexII | 99.0 VTEQLIEAINNGDFEAYTK        | Label: 13C(6)15N(2)(K) @ 19                                                                       |                | 0.0052619   | 2162.06763 | 721.6965 | 2162.06226 | 721.694702 | 3 | 21 | 18.8961 | 95.69  |
| 13 | 39.31 | 41.31 | 63.5 CAMK2D_FlexII | 99.0 VTEQLIEAINNGDFEAYTK        | Label: 13C(6)15N(2)(K) @ 19                                                                       |                | -0.00859656 | 2162.05347 | 1082.034 | 2162.06226 | 1082.03845 | 2 | 23 | 19.0732 | 95.69  |
| 13 | 39.31 | 41.31 | 63.5 CAMK2D_FlexII | 99.0 VTEQLIEAINNGDFEAYTK        | Label: 13C(6)15N(2)(K) @ 19                                                                       |                | -0.011767   | 2162.05054 | 721.6908 | 2162.06226 | 721.694702 | 3 | 20 | 19.0758 | 95.69  |
| 13 | 39.31 | 41.31 | 63.5 CAMK2D_FlexII | 99.0 VTEQLIEAINNGDFEAYTK        | Label: 13C(6)15N(2)(K) @ 19                                                                       |                | 0.00562812  | 2162.06787 | 721.6966 | 2162.06226 | 721.694702 | 3 | 17 | 18.9848 | 95.69  |
| 13 | 39.31 | 41.31 | 63.5 CAMK2D_FlexII | 99.0 VTEQLIEAINNGDFEAYTK        | Label: 13C(6)15N(2)(K) @ 19                                                                       |                | -0.0112177  | 2162.05103 | 721.691  | 2162.06226 | 721.694702 | 3 | 15 | 26.5668 | 95.69  |
| 13 | 39.31 | 41.31 | 63.5 CAMK2D_FlexII | 99.0 VTEQLIEAINNGDFEAYTK        | Deamidated(N) @ 10; Label: 13C(6)15N(2)(K) @ 19                                                   |                | 0.0248537   | 2163.07129 | 722.031  | 2163.04639 | 722.022705 | 3 | 14 | 26.5744 | 95.69  |
| 13 | 39.31 | 41.31 | 63.5 CAMK2D_FlexII | 99.0 YPTFLYK                    | Label: 13C(6)15N(2)(K) @ 7                                                                        |                | -0.00061447 | 938.498657 | 470.2566 | 938.499329 | 470.256928 | 2 | 9  | 17.7815 | 95.69  |
| 14 | 38.32 | 40.36 | 61.0 PPP3CA_FlexII | 99.0 DAMPSDANLNSINK             | Label: 13C(6)15N(2)(K) @ 14                                                                       |                | 0.0005139   | 1496.70264 | 749.3586 | 1496.70203 | 749.358276 | 2 | 17 | 16.2866 | 139.34 |
| 14 | 38.32 | 40.36 | 61.0 PPP3CA_FlexII | 99.0 EGRLEESVALR                | Label: 13C(6)15N(4)(R) @ 3; Label: 13C(6)15N(4)(R) @ 11                                           | missed R-L @ 3 | 0.00157485  | 1277.68591 | 639.8502 | 1277.6842  | 639.849426 | 2 | 16 | 15.8068 | 139.34 |
| 14 | 38.32 | 40.36 | 61.0 PPP3CA_FlexII | 99.0 FKEPPAYGPMCDILWSDPLEDFGNEK | Label: 13C(6)15N(2)(K) @ 2; Propionamide(C) @ 11; Label: 13C(6)15N(2)(K) @ 26                     | missed K-E @ 2 | -0.0165225  | 3084.40405 | 1029.142 | 3084.42188 | 1029.14795 | 3 | 25 | 20.0654 | 139.34 |
| 14 | 38.32 | 40.36 | 61.0 PPP3CA_FlexII | 99.0 GCSYFYSPVACEFLQHNNLLSILR   | Propionamide(C) @ 2; Propionamide(C) @ 12; Deamidated(C) @ 16; Label: 13C(6)15N(4)(R) @ 25        |                | 0.0090275   | 3089.47437 | 1030.832 | 3089.46558 | 1030.8291  | 3 | 13 | 20.5408 | 139.34 |
| 14 | 38.32 | 40.36 | 61.0 PPP3CA_FlexII | 99.0 GLTPTGMLPSGVLSSGK          | Label: 13C(6)15N(2)(K) @ 17                                                                       |                | 0.00193538  | 1578.8551  | 790.4348 | 1578.85303 | 790.433838 | 2 | 15 | 18.4612 | 139.34 |
| 14 | 38.32 | 40.36 | 61.0 PPP3CA_FlexII | 99.0 HLTEYFTFK                  | Label: 13C(6)15N(2)(K) @ 9                                                                        |                | -0.00176807 | 1192.59912 | 597.3068 | 1192.60083 | 597.307678 | 2 | 14 | 26.5952 | 139.34 |
| 14 | 38.32 | 40.36 | 61.0 PPP3CA_FlexII | 99.0 KSQTTGFPSLITIFSAPNYLDVYNNK | Label: 13C(6)15N(2)(K) @ 1; Label: 13C(6)15N(2)(K) @ 26                                           | missed K-S @ 1 | -0.00460887 | 2933.50977 | 978.8439 | 2933.51465 | 978.845459 | 3 | 22 | 20.373  | 139.34 |
| 14 | 38.32 | 40.36 | 61.0 PPP3CA_FlexII | 99.0 LFEVGGSPANTR               | Label: 13C(6)15N(4)(R) @ 12                                                                       |                | -0.00076911 | 1256.63831 | 629.3264 | 1256.63892 | 629.326721 | 2 | 15 | 16.6014 | 139.34 |
| 14 | 38.32 | 40.36 | 61.0 PPP3CA_FlexII | 99.0 NLLDIDAPVTVCGDIHGOFDDLK    | Propionamide(C) @ 12; Label: 13C(6)15N(2)(K) @ 24                                                 |                | 0.00235738  | 2739.35181 | 914.1245 | 2739.34912 | 914.123657 | 3 | 21 | 19.9688 | 139.34 |
| 14 | 38.32 | 40.36 | 61.0 PPP3CA_FlexII | 99.0 SQTTFGPSLITIFSAPNYLDVYNNK  | Label: 13C(6)15N(2)(K) @ 25                                                                       |                | -0.00528758 | 2797.40015 | 933.474  | 2797.40552 | 933.475769 | 3 | 21 | 20.5177 | 139.34 |
| 14 | 38.32 | 40.36 | 61.0 PPP3CA_FlexII | 99.0 VFSVLREESESVLTK            | Label: 13C(6)15N(4)(R) @ 6; Label: 13C(6)15N(2)(K) @ 16                                           | missed R-E @ 6 | 0.00267566  | 1853.0293  | 927.5219 | 1853.02649 | 927.520508 | 2 | 25 | 18.5448 | 139.34 |
| 14 | 38.32 | 40.36 | 61.0 PPP3CA_FlexII | 99.0 DAMPSDANLNSINK             | Deamidated(N) @ 10; Label: 13C(6)15N(2)(K) @ 14                                                   |                | 0.00161132  | 1497.68762 | 749.8511 | 1497.68804 | 749.850342 | 2 | 17 | 16.0737 | 139.34 |
| 14 | 38.32 | 40.36 | 61.0 PPP3CA_FlexII | 99.0 DAMPSDANLNSINK             | Label: 13C(6)15N(2)(K) @ 14                                                                       |                | 0.00088011  | 1496.70313 | 749.3588 | 1496.70203 | 749.358276 | 2 | 15 | 16.5818 | 139.34 |
| 14 | 38.32 | 40.36 | 61.0 PPP3CA_FlexII | 99.0 DAMPSDANLNSINK             | Label: 13C(6)15N(2)(K) @ 14                                                                       |                | 0.00088011  | 1496.70313 | 749.3588 | 1496.70203 | 749.358276 | 2 | 14 | 16.5843 | 139.34 |
| 14 | 38.32 | 40.36 | 61.0 PPP3CA_FlexII | 99.0 FKEPPAYGPMCDILWSDPLEDFGNEK | Label: 13C(6)15N(2)(K) @ 2; Propionamide(C) @ 11; Label: 13C(6)15N(2)(K) @ 26                     | missed K-E @ 2 | -0.00370502 | 3084.41919 | 1029.147 | 3084.42188 | 1029.14795 | 3 | 23 | 20.0933 | 139.34 |
| 14 | 38.32 | 40.36 | 61.0 PPP3CA_FlexII | 99.0 FKEPPAYGPMCDILWSDPLEDFGNEK | Label: 13C(6)15N(2)(K) @ 2; Propionamide(C) @ 11; Label: 13C(6)15N(2)(K) @ 26                     | missed K-E @ 2 | -0.00224017 | 3084.41919 | 1029.147 | 3084.42188 | 1029.14795 | 3 | 22 | 20.1874 | 139.34 |
| 14 | 38.32 | 40.36 | 61.0 PPP3CA_FlexII | 99.0 FKEPPAYGPMCDILWSDPLEDFGNEK | Label: 13C(6)15N(2)(K) @ 2; Propionamide(C) @ 11; Label: 13C(6)15N(2)(K) @ 26                     | missed K-E @ 2 | -0.0173414  | 3084.40405 | 1029.142 | 3084.42188 | 1029.14795 | 3 | 21 | 20.1274 | 139.34 |
| 14 | 38.32 | 40.36 | 61.0 PPP3CA_FlexII | 99.0 FKEPPAYGPMCDILWSDPLEDFGNEK | Label: 13C(6)15N(2)(K) @ 2; Propionamide(C) @ 11; Deamidated(N) @ 24; Label: 13C(6)15N(2)(K) @ 26 | missed K-E @ 2 | 0.0185443   | 3085.42432 | 1029.482 | 3085.40601 | 1029.47595 | 3 | 13 | 20.1554 | 139.34 |
| 14 | 38.32 | 40.36 | 61.0 PPP3CA_FlexII | 99.0 GCSYFYSPVACEFLQHNNLLSILR   | Propionamide(C) @ 2; Propionamide(C) @ 12; Label: 13C(6)15N(4)(R) @ 25                            |                | -0.00296007 | 3088.47827 | 1030.5   | 3088.48145 | 1030.5011  | 3 | 18 | 20.6042 | 139.34 |
| 14 | 38.32 | 40.36 | 61.0 PPP3CA_FlexII | 99.0 GCSYFYSPVACEFLQHNNLLSILR   | Propionamide(C) @ 2; Propionamide(C) @ 12; Label: 13C(6)15N(4)(R) @ 25                            |                | -0.00222765 | 3088.47827 | 1030.5   | 3088.48145 | 1030.5011  | 3 | 18 | 20.6399 | 139.34 |
| 14 | 38.32 | 40.36 | 61.0 PPP3CA_FlexII | 99.0 GLTPTGMLPSGVLSSGK          | Label: 13C(6)15N(2)(K) @ 17                                                                       |                | -0.00551095 | 1578.84753 | 790.431  | 1578.85303 | 790.433838 | 2 | 14 | 18.4193 | 139.34 |
| 14 | 38.32 | 40.36 | 61.0 PPP3CA_FlexII | 99.0 HLTEYFTFK                  | Label: 13C(6)15N(2)(K) @ 9                                                                        |                | -0.00176807 | 1192.59912 | 597.3068 | 1192.60083 | 597.307678 | 2 | 14 | 26.6003 | 139.34 |
| 14 | 38.32 | 40.36 | 61.0 PPP3CA_FlexII | 99.0 HLTEYFTFK                  | Label: 13C(6)15N(2)(K) @ 9                                                                        |                | 0.00201613  | 1192.60291 | 597.3087 | 1192.60083 | 597.307678 | 2 | 14 | 17.4925 | 139.34 |
| 14 | 38.32 | 40.36 | 61.0 PPP3CA_FlexII | 99.0 HLTEYFTFK                  | Label: 13C(6)15N(2)(K) @ 9                                                                        |                | 0.00201613  | 1192.60291 | 597.3087 | 1192.60083 | 597.307678 | 2 | 14 | 17.4948 | 139.34 |
| 14 | 38.32 | 40.36 | 61.0 PPP3CA_FlexII | 99.0 HLTEYFTFK                  | Label: 13C(6)15N(2)(K) @ 9                                                                        |                | 0.00201613  | 1192.60291 | 597.3087 | 1192.60083 | 597.307678 | 2 | 14 | 17.4998 | 139.34 |
| 14 | 38.32 | 40.36 | 61.0 PPP3CA_FlexII | 99.0 KSQTTGFPSLITIFSAPNYLDVYNNK | Label: 13C(6)15N(2)(K) @ 1; Label: 13C(6)15N(2)(K) @ 26                                           | missed K-S @ 1 | -0.00167916 | 2933.51294 | 978.8449 | 2933.51465 | 978.845459 | 3 | 25 | 20.3399 | 139.34 |
| 14 | 38.32 | 40.36 | 61.0 PPP3CA_FlexII | 99.0 KSQTTGFPSLITIFSAPNYLDVYNNK | Label: 13C(6)15N(2)(K) @ 1; Label: 13C(6)15N(2)(K) @ 26                                           | missed K-S @ 1 | -0.00167916 | 2933.51294 | 978.8449 | 2933.51465 | 978.845459 | 3 | 23 | 20.345  | 139.34 |
| 14 | 38.32 | 40.36 | 61.0 PPP3CA_FlexII | 99.0 KSQTTGFPSLITIFSAPNYLDVYNNK | Label: 13C(6)15N(2)(K) @ 1; Label: 13C(6)15N(2)(K) @ 26                                           | missed K-S @ 1 | -0.00460887 | 2933.50977 | 978.8439 | 2933.51465 | 978.845459 | 3 | 24 | 20.3653 | 139.34 |
| 14 | 38.32 | 40.36 | 61.0 PPP3CA_FlexII | 99.0 KSQTTGFPSLITIFSAPNYLDVYNNK | Label: 13C(6)15N(2)(K) @ 1; Label: 13C(6)15N(2)(K) @ 26                                           | missed K-S @ 1 | -0.00460887 | 2933.50977 | 978.8439 | 2933.51465 | 978.845459 | 3 | 21 | 20.3907 | 139.34 |
| 14 | 38.32 | 40.36 | 61.0 PPP3CA_FlexII | 99.0 LFEVGGSPANTR               | Label: 13C(6)15N(4)(R) @ 12                                                                       |                | 0.00032953  | 1256.63928 | 629.3269 | 1256.63892 | 629.326721 | 2 | 15 | 16.6163 | 139.34 |
| 14 | 38.32 | 40.36 | 61.0 PPP3CA_FlexII | 99.0 LFEVGGSPANTR               | Label: 13C(6)15N(4)(R) @ 12                                                                       |                | 0.00032953  | 1256.63928 | 629.3269 | 1256.63892 | 629.326721 | 2 | 14 | 16.6439 | 139.34 |
| 14 | 38.32 | 40.36 | 61.0 PPP3CA_FlexII | 99.0 NLLDIDAPVTVCGDIHGOFDDLK    | Propionamide(C) @ 12; Label: 13C(6)15N(2)(K) @ 24                                                 |                | 0.00235738  | 2739.35181 | 914.1245 | 2739.34912 | 914.123657 | 3 | 21 | 19.9713 | 139.34 |
| 14 | 38.32 | 40.36 | 61.0 PPP3CA_FlexII | 99.0 NLLDIDAPVTVCGDIHGOFDDLK    | Propionamide(C) @ 12; Label: 13C(6)15N(2)(K) @ 24                                                 |                | 0.00235738  | 2739.35181 | 914.1245 | 2739.34912 | 914.123657 | 3 | 20 | 19.9739 | 139.34 |
| 14 | 38.32 | 40.36 | 61.0 PPP3CA_FlexII | 99.0 NLLDIDAPVTVCGDIHGOFDDLK    | Propionamide(C) @ 12; Label: 13C(6)15N(2)(K) @ 24                                                 |                | 0.00235738  | 2739.35181 | 914.1245 | 2739.34912 | 914.123657 | 3 | 21 | 19.9816 | 139.34 |
| 14 | 38.32 | 40.36 | 61.0 PPP3CA_FlexII | 99.0 NLLDIDAPVTVCGDIHGOFDDLK    | Propionamide(C) @ 12; Label: 13C(6)15N(2)(K) @ 24                                                 |                | 0.00547019  | 2739.35474 | 914.1255 | 2739.34912 | 914.123657 | 3 | 20 | 26.6209 | 139.34 |
| 14 | 38.32 | 40.36 | 61.0 PPP3CA_FlexII | 99.0 NLLDIDAPVTVCGDIHGOFDDLK    | Deamidated(N) @ 1; Propionamide(C) @ 12; Label: 13C(6)15N(2)(K) @ 24                              |                | 0.0302163   | 2740.36328 | 914.4617 | 2740.33325 | 914.45166  | 3 | 18 | 20.0182 | 139.34 |
| 14 | 38.32 | 40.36 | 61.0 PPP3CA_FlexII | 99.0 NLLDIDAPVTVCGDIHGOFDDLK    | Propionamide(C) @ 12; Label: 13C(6)15N(2)(K) @ 24                                                 |                | -0.00109174 | 2739.34815 | 914.1233 | 2739.34912 | 914.123657 | 3 | 21 | 20.031  | 139.34 |
| 14 | 38.32 | 40.36 | 61.0 PPP3CA_FlexII | 99.0 NLLDIDAPVTVCGDIHGOFDDLK    | Propionamide(C) @ 12; Label: 13C(6)15N(2)(K) @ 24                                                 |                | -0.00640182 | 2739.34277 | 914.1215 | 2739.34912 | 914.123657 | 3 | 20 | 20.0512 | 139.34 |
| 14 | 38.32 | 40.36 | 61.0 PPP3CA_FlexII | 99.0 NLLDIDAPVTVCGDIHGOFDDLK    | Propionamide(C) @ 12; Label: 13C(6)15N(2)(K) @ 24                                                 |                | -0.00640182 | 2739.34277 | 914.1215 | 2739.34912 | 914.123657 | 3 | 19 | 20.0639 | 139.34 |
| 14 | 38.32 | 40.36 | 61.0 PPP3CA_FlexII | 99.0 NLLDIDAPVTVCGDIHGOFDDLK    | Deamidated(N) @ 1; Propionamide(C) @ 12; Label: 13C(6)15N(2)(K) @ 24                              |                | 0.0302163   | 2740.36328 | 914.4617 | 2740.33325 | 914.45166  | 3 | 14 | 26.6116 | 139.34 |
| 14 | 38.32 | 40.36 | 61.0 PPP3CA_FlexII | 99.0 NLLDIDAPVTVCGDIHGOFDDLK    | Propionamide(C) @ 12; Label: 13C(6)15N(2)(K) @ 24                                                 |                | -0.0058525  | 2739.34326 | 914.1217 | 2739.34912 | 914.123657 | 3 | 14 | 26.6193 | 139.34 |
| 14 | 38.32 | 40.36 | 61.0 PPP3CA_FlexII | 99.0 NLLDIDAPVTVCGDIHGOFDDLK    | Propionamide(C) @ 12; Label: 13C(6)15N(2)(K) @ 24                                                 |                | -0.00093854 | 2739.34839 | 914.1234 | 2739.34912 | 914.123657 | 3 | 18 | 20.0245 | 139.34 |
| 14 | 38.32 | 40.36 | 61.0 PPP3CA_FlexII | 99.0 NLLDIDAPVTVCGDIHGOFDDLK    | Propionamide(C) @ 12; Label: 13C(6)15N(2)(K) @ 24                                                 |                | -0.00569931 | 2739.34375 | 914.1218 | 2739.34912 | 914.123657 | 3 | 18 | 26.5978 | 139.34 |
| 14 | 38.32 | 40.36 | 61.0 PPP3CA_FlexII | 99.0 NLLDIDAPVTVCGDIHGOFDDLK    | Propionamide(C) @ 12; Label: 13C(6)15N(2)(K) @ 24                                                 |                | 0.00547019  | 2739.35474 | 914.1255 | 2739.34912 | 914.123657 | 3 | 18 | 26.6285 | 139.34 |
| 14 | 38.32 | 40.36 | 61.0 PPP3CA_FlexII | 99.0 NLLDIDAPVTVCGDIHGOFDDLK    | Deamidated(N) @ 1; Propionamide(C) @ 12; Label: 13C(6)15N(2)(K) @ 24                              |                | 0.0210934   | 2740.35327 | 1371.184 | 2740.33325 | 1371.17383 | 2 | 18 | 20.0856 | 139.34 |
| 14 | 38.32 | 40.36 | 61.0 PPP3CA_FlexII | 99.0 NLLDIDAPVTVCGDIHGOFDDLK    | Deamidated(N) @ 1; Propionamide(C) @ 12; Label: 13C(6)15N(2)(K) @ 24                              |                | 0.0303715   | 2740.36353 | 914.4618 | 2740.33325 | 914.45166  | 3 | 17 | 26.5927 | 139.34 |
| 14 | 38.32 | 40.36 | 61.0 PPP3CA_FlexII | 99.0 NLLDIDAPVTVCGDIHGOFDDLK    | Propionamide(C) @ 12; Label: 13C(6)15N(2)(K) @ 24                                                 |                | -0.00093854 | 2739.34839 | 914.1234 | 2739.34912 | 914.123657 | 3 | 15 | 20.0882 | 139.34 |
| 14 | 38.32 | 40.36 | 61.0 PPP3CA_FlexII | 99.0 SQTTFGPSLITIFSAPNYLDVYNNK  | Label: 13C(6)15N(2)(K) @ 25                                                                       |                | 0.00386708  | 2797.40942 | 1399.712 | 2797.40552 | 1399.70996 | 2 | 25 | 20.5051 | 139.34 |
| 14 | 38.32 | 40.36 | 61.0 PPP3CA_FlexII | 99.0 SQTTFGPSLITIFSAPNYLDVYNNK  | Label: 13C(6)15N(2)(K) @ 25                                                                       |                | 0.00386708  | 2797.40942 | 1399.712 | 2797.40552 |            |   |    |         |        |

|    |       |       |                      |                            |                                                                         |               |             |            |          |            |            |   |    |         |       |
|----|-------|-------|----------------------|----------------------------|-------------------------------------------------------------------------|---------------|-------------|------------|----------|------------|------------|---|----|---------|-------|
| 16 | 36.84 | 38.92 | 46.6 C3ORD37_FlexIII | 99.0 ESDPSKLOFNTTNCR       | Label: 13C(6)15N(2)(K)@6; Propionamide(C)@14; Label: 13C(6)15N(4)(R)@15 | missed K-L@6  | -0.00604921 | 1827.8479  | 610.2899 | 1827.854   | 610.291931 | 3 | 10 | 15.4889 | 50.01 |
| 16 | 36.84 | 38.92 | 46.6 C3ORD37_FlexIII | 99.0 GTAGLLEQWLK           | Label: 13C(6)15N(2)(K)@11                                               |               | -0.00712581 | 1222.6731  | 612.3438 | 1222.68018 | 612.347351 | 2 | 16 | 19.4014 | 50.01 |
| 16 | 36.84 | 38.92 | 46.6 C3ORD37_FlexIII | 99.0 LHFDKADADSSER         | Label: 13C(6)15N(2)(K)@5; Label: 13C(6)15N(4)(R)@12                     | missed K-D@5  | -0.00203673 | 1436.66296 | 360.173  | 1436.66504 | 360.173554 | 4 | 13 | 13.9031 | 50.01 |
| 16 | 36.84 | 38.92 | 46.6 C3ORD37_FlexIII | 99.0 LIHPTEINTFHAVSSVNNNSR | Label: 13C(6)15N(4)(R)@21                                               |               | -0.00705622 | 2344.20898 | 782.4103 | 2344.21631 | 782.41272  | 3 | 12 | 26.543  | 50.01 |
| 16 | 36.84 | 38.92 | 46.6 C3ORD37_FlexIII | 99.0 MLQWLATK              | Label: 13C(6)15N(2)(K)@8                                                |               | -0.00078067 | 997.550293 | 499.7824 | 997.551025 | 499.782776 | 2 | 10 | 18.1078 | 50.01 |
| 16 | 36.84 | 38.92 | 46.6 C3ORD37_FlexIII | 99.0 MPAILDGEEAVSK         | Label: 13C(6)15N(2)(K)@13                                               |               | 0.00059148  | 1366.68982 | 684.3522 | 1366.68933 | 684.35199  | 2 | 19 | 17.3127 | 50.01 |
| 16 | 36.84 | 38.92 | 46.6 C3ORD37_FlexIII | 99.0 NNTPECLAPVDLVVK       | Propionamide(C)@6; Label: 13C(6)15N(2)(K)@15                            |               | -4.91E-06   | 1689.88513 | 845.9498 | 1689.88513 | 845.949829 | 2 | 14 | 18.2342 | 50.01 |
| 16 | 36.84 | 38.92 | 46.6 C3ORD37_FlexIII | 99.0 NNTPECLAPVDLVVK       | Propionamide(C)@6; Label: 13C(6)15N(2)(K)@15; Label: 13C(6)15N(2)(K)@16 | missed K-K@15 | 0.00031389  | 1825.99451 | 609.6721 | 1825.99426 | 609.672058 | 3 | 17 | 17.3657 | 50.01 |
| 16 | 36.84 | 38.92 | 46.6 C3ORD37_FlexIII | 99.0 QPYFIYFPOIK           | Gln->pyro-Glu@N-term; Label: 13C(6)15N(2)(K)@11                         |               | -0.00253866 | 1433.74512 | 717.8798 | 1433.74744 | 717.881043 | 2 | 14 | 20.4282 | 50.01 |
| 16 | 36.84 | 38.92 | 46.6 C3ORD37_FlexIII | 99.0 RGTAGLLEQWLK          | Label: 13C(6)15N(4)(R)@1; Label: 13C(6)15N(2)(K)@12                     | missed R-G@1  | -0.003664   | 1388.78589 | 695.4002 | 1388.78955 | 695.402039 | 2 | 13 | 18.6205 | 50.01 |
| 16 | 36.84 | 38.92 | 46.6 C3ORD37_FlexIII | 99.0 SGSIGAADSPENWEK       | Label: 13C(6)15N(2)(K)@15                                               |               | 0.00078909  | 1554.70483 | 778.3597 | 1554.70422 | 778.359375 | 2 | 20 | 16.2527 | 50.01 |
| 16 | 36.84 | 38.92 | 46.6 C3ORD37_FlexIII | 99.0 SPQSNSPVLLSR          |                                                                         |               | 0.00211369  | 1283.68543 | 642.85   | 1283.68335 | 642.848938 | 2 | 15 | 16.2074 | 50.01 |
| 16 | 36.84 | 38.92 | 46.6 C3ORD37_FlexIII | 99.0 TPQKEESDVPQWSSQFLQK   | Label: 13C(6)15N(2)(K)@4; Label: 13C(6)15N(2)(K)@19                     | missed K-E@4  | -0.00191833 | 2277.1228  | 760.0482 | 2277.12476 | 760.048889 | 3 | 17 | 17.5554 | 50.01 |
| 16 | 36.84 | 38.92 | 46.6 C3ORD37_FlexIII | 99.0 TSCHLPR               | Propionamide(C)@3; Label: 13C(6)15N(4)(R)@7                             |               | -0.00114428 | 893.440491 | 447.7275 | 893.441711 | 447.728119 | 2 | 9  | 13.1739 | 50.01 |
| 16 | 36.84 | 38.92 | 46.6 C3ORD37_FlexIII | 99.0 WGLVPSWFK             | Label: 13C(6)15N(2)(K)@9                                                |               | -0.00073746 | 1126.60461 | 564.3096 | 1126.60547 | 564.309998 | 2 | 12 | 19.9665 | 50.01 |
| 16 | 36.84 | 38.92 | 46.6 C3ORD37_FlexIII | 99.0 WLDFGEVSTOEALK        | Label: 13C(6)15N(2)(K)@14                                               |               | -0.00298705 | 1629.81006 | 815.9123 | 1629.81299 | 815.913757 | 2 | 16 | 18.8105 | 50.01 |
| 16 | 36.84 | 38.92 | 46.6 C3ORD37_FlexIII | 99.0 CVVLADGFYEWQR         | Propionamide(C)@1; Label: 13C(6)15N(4)(R)@13                            |               | -0.00445499 | 1665.78052 | 833.8975 | 1665.78491 | 833.899719 | 2 | 18 | 18.6941 | 50.01 |
| 16 | 36.84 | 38.92 | 46.6 C3ORD37_FlexIII | 99.0 CVVLADGFYEWQR         | Propionamide(C)@1; Label: 13C(6)15N(4)(R)@13                            |               | -0.00445499 | 1665.78052 | 833.8975 | 1665.78491 | 833.899719 | 2 | 16 | 18.7042 | 50.01 |
| 16 | 36.84 | 38.92 | 46.6 C3ORD37_FlexIII | 99.0 CVVLADGFYEWQR         | Propionamide(C)@1; Label: 13C(6)15N(4)(R)@13                            |               | -0.00164737 | 1665.78333 | 833.8989 | 1665.78491 | 833.899719 | 2 | 17 | 18.7497 | 50.01 |
| 16 | 36.84 | 38.92 | 46.6 C3ORD37_FlexIII | 99.0 DDPKYCPSYNK           | Label: 13C(6)15N(2)(K)@4; Propionamide(C)@6; Label: 13C(6)15N(2)(K)@11  | missed K-Y@4  | -0.00123878 | 1415.63489 | 472.8856 | 1415.63623 | 472.886017 | 3 | 14 | 14.2713 | 50.01 |
| 16 | 36.84 | 38.92 | 46.6 C3ORD37_FlexIII | 99.0 DDPKYCPSYNK           | Label: 13C(6)15N(2)(K)@4; Propionamide(C)@6; Label: 13C(6)15N(2)(K)@11  | missed K-Y@4  | -0.00118764 | 1415.63513 | 708.8248 | 1415.63623 | 708.825378 | 2 | 17 | 14.3167 | 50.01 |
| 16 | 36.84 | 38.92 | 46.6 C3ORD37_FlexIII | 99.0 DDPKYCPSYNK           | Label: 13C(6)15N(2)(K)@4; Propionamide(C)@6; Label: 13C(6)15N(2)(K)@11  | missed K-Y@4  | -0.00118764 | 1415.63513 | 708.8248 | 1415.63623 | 708.825378 | 2 | 17 | 14.3445 | 50.01 |
| 16 | 36.84 | 38.92 | 46.6 C3ORD37_FlexIII | 99.0 GTAGLLEQWLK           | Label: 13C(6)15N(2)(K)@11                                               |               | -0.00712581 | 1222.6731  | 612.3438 | 1222.68018 | 612.347351 | 2 | 15 | 19.4139 | 50.01 |
| 16 | 36.84 | 38.92 | 46.6 C3ORD37_FlexIII | 99.0 GTAGLLEQWLK           | Label: 13C(6)15N(2)(K)@11                                               |               | -0.00651545 | 1222.67371 | 612.3441 | 1222.68018 | 612.347351 | 2 | 12 | 19.4443 | 50.01 |
| 16 | 36.84 | 38.92 | 46.6 C3ORD37_FlexIII | 99.0 LHFDKADADSSER         | Label: 13C(6)15N(2)(K)@5; Label: 13C(6)15N(4)(R)@12                     | missed K-D@5  | 0.011961    | 1436.677   | 479.8996 | 1436.66504 | 479.89563  | 3 | 14 | 13.8024 | 50.01 |
| 16 | 36.84 | 38.92 | 46.6 C3ORD37_FlexIII | 99.0 LHFDKADADSSER         | Label: 13C(6)15N(2)(K)@5; Label: 13C(6)15N(4)(R)@12                     | missed K-D@5  | 0.00087316  | 1436.66602 | 719.3403 | 1436.66504 | 719.339844 | 2 | 19 | 13.8326 | 50.01 |
| 16 | 36.84 | 38.92 | 46.6 C3ORD37_FlexIII | 99.0 LHFDKADADSSER         | Label: 13C(6)15N(2)(K)@5; Label: 13C(6)15N(4)(R)@12                     | missed K-D@5  | -0.00120204 | 1436.66382 | 719.3392 | 1436.66504 | 719.339844 | 2 | 17 | 13.8279 | 50.01 |
| 16 | 36.84 | 38.92 | 46.6 C3ORD37_FlexIII | 99.0 LHFDKADADSSER         | Label: 13C(6)15N(2)(K)@5; Label: 13C(6)15N(4)(R)@12                     | missed K-D@5  | -0.0168073  | 1436.64819 | 360.1693 | 1436.66504 | 360.173554 | 4 | 11 | 13.8401 | 50.01 |
| 16 | 36.84 | 38.92 | 46.6 C3ORD37_FlexIII | 99.0 LHFDKADADSSER         | Label: 13C(6)15N(2)(K)@5; Label: 13C(6)15N(4)(R)@12                     | missed K-D@5  | -0.00447814 | 1436.66052 | 360.1724 | 1436.66504 | 360.173554 | 4 | 12 | 13.8628 | 50.01 |
| 16 | 36.84 | 38.92 | 46.6 C3ORD37_FlexIII | 99.0 LIHPTEINTFHAVSSVNNNSR | Deamidated(N)@19; Label: 13C(6)15N(4)(R)@21                             |               | 0.00117921  | 2345.20142 | 782.7411 | 2345.20044 | 782.740723 | 3 | 18 | 17.1105 | 50.01 |
| 16 | 36.84 | 38.92 | 46.6 C3ORD37_FlexIII | 99.0 LIHPTEINTFHAVSSVNNNSR | Deamidated(N)@19; Label: 13C(6)15N(4)(R)@21                             |               | 0.0101613   | 2345.21045 | 587.3099 | 2345.20044 | 587.307373 | 4 | 15 | 17.1307 | 50.01 |
| 16 | 36.84 | 38.92 | 46.6 C3ORD37_FlexIII | 99.0 LIHPTEINTFHAVSSVNNNSR | Deamidated(N)@18; Label: 13C(6)15N(4)(R)@21                             |               | -0.00101806 | 2345.19946 | 782.7404 | 2345.20044 | 782.740723 | 3 | 17 | 17.1383 | 50.01 |
| 16 | 36.84 | 38.92 | 46.6 C3ORD37_FlexIII | 99.0 LIHPTEINTFHAVSSVNNNSR | Label: 13C(6)15N(4)(R)@21                                               |               | -0.00582562 | 2344.21045 | 587.0599 | 2344.21631 | 587.06134  | 4 | 15 | 17.1939 | 50.01 |
| 16 | 36.84 | 38.92 | 46.6 C3ORD37_FlexIII | 99.0 LIHPTEINTFHAVSSVNNNSR | Label: 13C(6)15N(4)(R)@21                                               |               | -0.00705622 | 2344.20898 | 782.4103 | 2344.21631 | 782.41272  | 3 | 18 | 17.199  | 50.01 |
| 16 | 36.84 | 38.92 | 46.6 C3ORD37_FlexIII | 99.0 LIHPTEINTFHAVSSVNNNSR | Label: 13C(6)15N(4)(R)@21                                               |               | -0.00156305 | 2344.2146  | 782.4122 | 2344.21631 | 782.41272  | 3 | 17 | 17.2319 | 50.01 |
| 16 | 36.84 | 38.92 | 46.6 C3ORD37_FlexIII | 99.0 LIHPTEINTFHAVSSVNNNSR | Deamidated(N)@7; Label: 13C(6)15N(4)(R)@21                              |               | 0.0290113   | 2345.22949 | 782.7504 | 2345.20044 | 782.740723 | 3 | 13 | 26.5122 | 50.01 |
| 16 | 36.84 | 38.92 | 46.6 C3ORD37_FlexIII | 99.0 LIHPTEINTFHAVSSVNNNSR | Label: 13C(6)15N(4)(R)@21                                               |               | -0.00411663 | 2344.21216 | 587.0603 | 2344.21631 | 587.06134  | 4 | 12 | 26.5172 | 50.01 |
| 16 | 36.84 | 38.92 | 46.6 C3ORD37_FlexIII | 99.0 LIHPTEINTFHAVSSVNNNSR | Label: 13C(6)15N(4)(R)@21                                               |               | -0.00143107 | 2344.21484 | 587.061  | 2344.21631 | 587.06134  | 4 | 12 | 26.5354 | 50.01 |
| 16 | 36.84 | 38.92 | 46.6 C3ORD37_FlexIII | 99.0 LIHPTEINTFHAVSSVNNNSR | Label: 13C(6)15N(4)(R)@21                                               |               | -0.00143107 | 2344.21484 | 587.061  | 2344.21631 | 587.06134  | 4 | 12 | 26.5379 | 50.01 |
| 16 | 36.84 | 38.92 | 46.6 C3ORD37_FlexIII | 99.0 LIHPTEINTFHAVSSVNNNSR | Label: 13C(6)15N(4)(R)@21                                               |               | 0.00319771  | 2344.21973 | 782.4138 | 2344.21631 | 782.41272  | 3 | 10 | 26.5942 | 50.01 |
| 16 | 36.84 | 38.92 | 46.6 C3ORD37_FlexIII | 99.0 MLQWLATK              | Label: 13C(6)15N(2)(K)@8                                                |               | -0.00078067 | 997.550293 | 499.7824 | 997.551025 | 499.782776 | 2 | 10 | 18.1027 | 50.01 |
| 16 | 36.84 | 38.92 | 46.6 C3ORD37_FlexIII | 99.0 MLQWLATK              | Label: 13C(6)15N(2)(K)@8                                                |               | -0.00041446 | 997.550659 | 499.7826 | 997.551025 | 499.782776 | 2 | 10 | 18.1305 | 50.01 |
| 16 | 36.84 | 38.92 | 46.6 C3ORD37_FlexIII | 99.0 MPAILDGEEAVSK         | Label: 13C(6)15N(2)(K)@13                                               |               | 0.00059148  | 1366.68982 | 684.3522 | 1366.68933 | 684.35199  | 2 | 19 | 17.3177 | 50.01 |
| 16 | 36.84 | 38.92 | 46.6 C3ORD37_FlexIII | 99.0 MPAILDGEEAVSK         | Label: 13C(6)15N(2)(K)@13                                               |               | 0.00095769  | 1366.69031 | 684.3524 | 1366.68933 | 684.35199  | 2 | 18 | 17.3481 | 50.01 |
| 16 | 36.84 | 38.92 | 46.6 C3ORD37_FlexIII | 99.0 MPAILDGEEAVSK         | Label: 13C(6)15N(2)(K)@13                                               |               | 0.00242254  | 1366.69165 | 684.3531 | 1366.68933 | 684.35199  | 2 | 18 | 17.3758 | 50.01 |
| 16 | 36.84 | 38.92 | 46.6 C3ORD37_FlexIII | 99.0 NNTPECLAPVDLVVK       | Propionamide(C)@6; Label: 13C(6)15N(2)(K)@15                            |               | 0.00145994  | 1689.88672 | 845.9506 | 1689.88513 | 845.949829 | 2 | 15 | 18.2209 | 50.01 |
| 16 | 36.84 | 38.92 | 46.6 C3ORD37_FlexIII | 99.0 NNTPECLAPVDLVVK       | Deamidated(N)@2; Propionamide(C)@6; Label: 13C(6)15N(2)(K)@15           |               | -0.00135202 | 1690.86792 | 846.4412 | 1690.86914 | 846.441834 | 2 | 16 | 18.7421 | 50.01 |
| 16 | 36.84 | 38.92 | 46.6 C3ORD37_FlexIII | 99.0 NNTPECLAPVDLVVK       | Deamidated(N)@2; Propionamide(C)@6; Label: 13C(6)15N(2)(K)@15           |               | -0.00135202 | 1690.86792 | 846.4412 | 1690.86914 | 846.441834 | 2 | 16 | 18.7446 | 50.01 |
| 16 | 36.84 | 38.92 | 46.6 C3ORD37_FlexIII | 99.0 NNTPECLAPVDLVVK       | Deamidated(N)@2; Propionamide(C)@6; Label: 13C(6)15N(2)(K)@15           |               | -0.00122994 | 1690.86792 | 846.4412 | 1690.86914 | 846.441834 | 2 | 13 | 18.8029 | 50.01 |
| 16 | 36.84 | 38.92 | 46.6 C3ORD37_FlexIII | 99.0 NNTPECLAPVDLVVK       | Deamidated(N)@2; Propionamide(C)@6; Label: 13C(6)15N(2)(K)@15           |               | 0.0174469   | 1690.88672 | 846.4506 | 1690.86914 | 846.441834 | 2 | 12 | 18.2183 | 50.01 |
| 16 | 36.84 | 38.92 | 46.6 C3ORD37_FlexIII | 99.0 NNTPECLAPVDLVVK       | Propionamide(C)@6; Label: 13C(6)15N(2)(K)@15; Label: 13C(6)15N(2)(K)@16 | missed K-K@15 | 0.00031389  | 1825.99451 | 609.6721 | 1825.99426 | 609.672058 | 3 | 18 | 17.343  | 50.01 |
| 16 | 36.84 | 38.92 | 46.6 C3ORD37_FlexIII | 99.0 NNTPECLAPVDLVVK       | Propionamide(C)@6; Label: 13C(6)15N(2)(K)@15; Label: 13C(6)15N(2)(K)@16 | missed K-K@15 | 0.00031389  | 1825.99451 | 609.6721 | 1825.99426 | 609.672058 | 3 | 17 | 17.3455 | 50.01 |
| 16 | 36.84 | 38.92 | 46.6 C3ORD37_FlexIII | 99.0 QPYFIYFPOIK           | Label: 13C(6)15N(2)(K)@11                                               |               | -0.00487532 | 1450.76904 | 726.3918 | 1450.77405 | 726.394287 | 2 | 13 | 19.4797 | 50.01 |
| 16 | 36.84 | 38.92 | 46.6 C3ORD37_FlexIII | 99.0 QPYFIYFPOIK           | Label: 13C(6)15N(2)(K)@11                                               |               | -0.00487532 | 1450.76904 | 726.3918 | 1450.77405 | 726.394287 | 2 | 15 | 19.4823 | 50.01 |
| 16 | 36.84 | 38.92 | 46.6 C3ORD37_FlexIII | 99.0 QPYFIYFPOIK           | Gln->pyro-Glu@N-term; Label: 13C(6)15N(2)(K)@11                         |               | -0.0015621  | 1433.74585 | 717.8802 | 1433.74744 | 717.881043 | 2 | 14 | 20.3952 | 50.01 |
| 16 | 36.84 | 38.92 | 46.6 C3ORD37_FlexIII | 99.0 QPYFIYFPOIK           | Label: 13C(6)15N(2)(K)@11                                               |               | -0.00487532 | 1450.76904 | 726.3918 | 1450.77405 | 726.394287 | 2 | 11 | 19.4848 | 50.01 |
| 16 | 36.84 | 38.92 | 46.6 C3ORD37_FlexIII | 99.0 QPYFIYFPOIK           | Gln->pyro-Glu@N-term; Label: 13C(6)15N(2)(K)@11                         |               | -0.00192831 | 1433.74573 | 717.8801 | 1433.74744 | 717.881043 | 2 | 12 | 20.4665 | 50.01 |
| 16 | 36.84 | 38.92 | 46.6 C3ORD37_FlexIII | 99.0 SGSIGAADSPENWEK       | Label: 13C(6)15N(2)(K)@15                                               |               | 0.00078909  | 1554.70483 | 778.3597 | 1554.70422 | 778.359375 | 2 | 21 | 16.2628 | 50.01 |
| 16 | 36.84 | 38.92 | 46.6 C3ORD37_FlexIII | 99.0 SGSIGAADSPENWEK       |                                                                         |               |             |            |          |            |            |   |    |         |       |

|    |       |       |                      |                                                |                                                                                                              |                                |             |            |          |            |            |   |    |         |       |
|----|-------|-------|----------------------|------------------------------------------------|--------------------------------------------------------------------------------------------------------------|--------------------------------|-------------|------------|----------|------------|------------|---|----|---------|-------|
| 16 | 36.84 | 38.92 | 46.6 C3ORD37_FlexIII | 99.0 TPOKEESDV/PQWSSQFLQK                      | Label: 13C(6)15N(2)(K) @4; Label: 13C(6)15N(2)(K) @19                                                        | missed K-E @4                  | -0.00191833 | 2277.1228  | 760.0482 | 2277.12476 | 760.048889 | 3 | 16 | 17.5781 | 50.01 |
| 16 | 36.84 | 38.92 | 46.6 C3ORD37_FlexIII | 99.0 TSCHLPR                                   | Propionamide(C) @3; Label: 13C(6)15N(4)(R) @7                                                                |                                | 0.00288405  | 893.444702 | 447.7296 | 893.441711 | 447.728119 | 2 | 9  | 13.1134 | 50.01 |
| 16 | 36.84 | 38.92 | 46.6 C3ORD37_FlexIII | 99.0 WGLVPWSFK                                 | Label: 13C(6)15N(2)(K) @9                                                                                    |                                | -0.00073746 | 1126.60461 | 564.3096 | 1126.60547 | 564.309988 | 2 | 11 | 19.9716 | 50.01 |
| 16 | 36.84 | 38.92 | 46.6 C3ORD37_FlexIII | 99.0 WGLVPWSFK                                 | Label: 13C(6)15N(2)(K) @9                                                                                    |                                | -0.00159195 | 1126.60388 | 564.3092 | 1126.60547 | 564.309988 | 2 | 10 | 19.997  | 50.01 |
| 16 | 36.84 | 38.92 | 46.6 C3ORD37_FlexIII | 99.0 WLDGFEVSTQEALK                            | Label: 13C(6)15N(2)(K) @14                                                                                   |                                | -0.00176635 | 1629.81128 | 815.9129 | 1629.81299 | 815.913757 | 2 | 16 | 18.7775 | 50.01 |
| 16 | 36.84 | 38.92 | 46.6 C3ORD37_FlexIII | 99.0 WLDGFEVSTQEALK                            | Label: 13C(6)15N(2)(K) @14                                                                                   |                                | -0.00176635 | 1629.81128 | 815.9129 | 1629.81299 | 815.913757 | 2 | 16 | 18.7801 | 50.01 |
| 16 | 36.84 | 38.92 | 46.6 C3ORD37_FlexIII | 99.0 WLDGFEVSTQEALK                            | Label: 13C(6)15N(2)(K) @14                                                                                   |                                | -0.00298705 | 1629.81006 | 815.9123 | 1629.81299 | 815.913757 | 2 | 16 | 18.8156 | 50.01 |
| 16 | 36.84 | 38.92 | 46.6 C3ORD37_FlexIII | 99.0 YPTFLYK                                   | Label: 13C(6)15N(2)(K) @7                                                                                    | cleaved Q-Y @N-term            | -0.00061447 | 938.498657 | 470.2566 | 938.499329 | 470.256928 | 2 | 9  | 17.7815 | 50.01 |
| 17 | 36    | 38    | 65.3 TOB1_FlexIII    | 99.0 AISSSMHSLYGLGLGSQQQPQQQQAQPPPPPPPPQQQQQK  | Label: 13C(6)15N(2)(K) @43                                                                                   |                                | -0.00264088 | 4677.32275 | 1170.338 | 4677.32373 | 1170.33826 | 4 | 18 | 17.293  | 84.84 |
| 17 | 36    | 38    | 65.3 TOB1_FlexIII    | 99.0 CIHGEK                                    | Propionamide(C) @1; Label: 13C(6)15N(2)(K) @7                                                                |                                | 0.0003648   | 877.457459 | 439.736  | 877.457092 | 439.73584  | 2 | 10 | 14.1795 | 84.84 |
| 17 | 36    | 38    | 65.3 TOB1_FlexIII    | 99.0 CIHGEKVDPIEQASK                           | Propionamide(C) @1; Label: 13C(6)15N(2)(K) @7; Label: 13C(6)15N(2)(K) @17                                    | missed K-V @7                  | -0.00204233 | 1952.0354  | 651.6857 | 1952.03723 | 651.68634  | 3 | 24 | 16.17   | 84.84 |
| 17 | 36    | 38    | 65.3 TOB1_FlexIII    | 99.0 ESGLDIDDVR                                |                                                                                                              |                                | -0.00049625 | 1117.52466 | 559.7696 | 1117.52515 | 559.769636 | 2 | 11 | 16.6666 | 84.84 |
| 17 | 36    | 38    | 65.3 TOB1_FlexIII    | 99.0 GNLQDQLSVW/IDPFEVSYQIGEK                  | Label: 13C(6)15N(2)(K) @23                                                                                   |                                | -0.00074816 | 2641.31543 | 1321.665 | 2641.31543 | 1321.66504 | 2 | 19 | 20.4271 | 84.84 |
| 17 | 36    | 38    | 65.3 TOB1_FlexIII    | 99.0 KKYEGHWYPEKPYK                            | Label: 13C(6)15N(2)(K) @1; Label: 13C(6)15N(2)(K) @2; Label: 13C(6)15N(2)(K) @11; Label: 13C(6)15N(2)(K) @14 | missed K-K @1; missed K-Y @2   | -0.0236212  | 1883.96411 | 377.8001 | 1883.98755 | 377.80481  | 5 | 10 | 14.4442 | 84.84 |
| 17 | 36    | 38    | 65.3 TOB1_FlexIII    | 99.0 KYEGHWYPEKPYK                             | Label: 13C(6)15N(2)(K) @1; Label: 13C(6)15N(2)(K) @10; Label: 13C(6)15N(2)(K) @13                            | missed K-Y @1                  | 0.00174018  | 1747.88013 | 437.9773 | 1747.87842 | 437.976898 | 4 | 12 | 14.9374 | 84.84 |
| 17 | 36    | 38    | 65.3 TOB1_FlexIII    | 99.0 NSFNPEAQVFMPISDPASSVSSSPSPFPGHSAAVSPTFMFR | Label: 13C(6)15N(4)(R) @41                                                                                   |                                | -0.0239882  | 4270.9707  | 1068.75  | 4270.99658 | 1068.75647 | 4 | 21 | 18.9828 | 84.84 |
| 17 | 36    | 38    | 65.3 TOB1_FlexIII    | 99.0 RVNIFGEELER                               | Label: 13C(6)15N(4)(R) @1; Label: 13C(6)15N(4)(R) @11                                                        | missed R-V @1                  | -0.00330541 | 1380.72302 | 691.3688 | 1380.72644 | 691.370483 | 2 | 14 | 17.2271 | 84.84 |
| 17 | 36    | 38    | 65.3 TOB1_FlexIII    | 99.0 STQPLTFTTATFAATK                          | Label: 13C(6)15N(2)(K) @16                                                                                   |                                | -0.00270196 | 1692.87866 | 565.3002 | 1692.88135 | 565.301086 | 3 | 18 | 18.0324 | 84.84 |
| 17 | 36    | 38    | 65.3 TOB1_FlexIII    | 99.0 STQPLTFTTATFAATKFGSTKMK                   | Oxidation(M) @22                                                                                             | missed K-F @16; missed K-M @21 | -0.0755898  | 2480.18726 | 1241.101 | 2480.26221 | 1241.13831 | 2 | 10 | 18.1438 | 84.84 |
| 17 | 36    | 38    | 65.3 TOB1_FlexIII    | 99.0 TSALSPNAK                                 | Label: 13C(6)15N(2)(K) @9                                                                                    |                                | 0.00024978  | 895.485657 | 448.7501 | 895.485474 | 448.75     | 2 | 8  | 12.4474 | 84.84 |
| 17 | 36    | 38    | 65.3 TOB1_FlexIII    | 99.0 TSPNIGLNVNDLLK                            |                                                                                                              |                                | -0.00877435 | 1609.89502 | 805.9548 | 1609.90393 | 805.959229 | 2 | 17 | 19.3713 | 84.84 |
| 17 | 36    | 38    | 65.3 TOB1_FlexIII    | 99.0 VDPVIEQASK                                |                                                                                                              |                                | 0.00054641  | 1084.57703 | 543.2958 | 1084.57642 | 543.295471 | 2 | 12 | 15.2455 | 84.84 |
| 17 | 36    | 38    | 65.3 TOB1_FlexIII    | 99.0 VLYVDNNENGCELDK                           | Propionamide(C) @12; Label: 13C(6)15N(2)(K) @16                                                              |                                | -0.00310499 | 1917.84753 | 959.931  | 1917.85059 | 959.932556 | 2 | 19 | 16.3637 | 84.84 |
| 17 | 36    | 38    | 65.3 TOB1_FlexIII    | 99.0 VLYVDNNENGCELDKEIK                        | Propionamide(C) @12; Label: 13C(6)15N(2)(K) @16; Label: 13C(6)15N(2)(K) @19                                  | missed K-E @16                 | -0.00154729 | 2296.08496 | 766.3689 | 2296.08643 | 766.369385 | 3 | 15 | 15.6662 | 84.84 |
| 17 | 36    | 38    | 65.3 TOB1_FlexIII    | 99.0 VNIFGEELER                                | Label: 13C(6)15N(4)(R) @10                                                                                   |                                | -0.00363642 | 1214.61353 | 608.314  | 1214.61707 | 608.315796 | 2 | 11 | 18.6225 | 84.84 |
| 17 | 36    | 38    | 65.3 TOB1_FlexIII    | 99.0 YEGHWYPEKPYK                              | Label: 13C(6)15N(2)(K) @9; Label: 13C(6)15N(2)(K) @12                                                        |                                | -0.0105571  | 1611.75879 | 538.2602 | 1611.76929 | 538.263672 | 3 | 13 | 15.3558 | 84.84 |
| 17 | 36    | 38    | 65.3 TOB1_FlexIII    | 99.0 AISSSMHSLYGLGLGSQQQPQQQQAQPPPPPPPPQQQQQK  | Deamidated(Q) @28; Label: 13C(6)15N(2)(K) @43                                                                |                                | 0.0250628   | 4678.33057 | 1170.59  | 4678.30762 | 1170.58423 | 4 | 21 | 17.2118 | 84.84 |
| 17 | 36    | 38    | 65.3 TOB1_FlexIII    | 99.0 AISSSMHSLYGLGLGSQQQPQQQQAQPPPPPPPPQQQQQK  | Deamidated(Q) @28; Label: 13C(6)15N(2)(K) @43                                                                |                                | 0.00771398  | 4678.31494 | 936.6703 | 4678.30762 | 936.668823 | 5 | 21 | 17.2853 | 84.84 |
| 17 | 36    | 38    | 65.3 TOB1_FlexIII    | 99.0 AISSSMHSLYGLGLGSQQQPQQQQAQPPPPPPPPQQQQQK  | Label: 13C(6)15N(2)(K) @43                                                                                   |                                | -0.0021526  | 4677.32275 | 1170.338 | 4677.32373 | 1170.33826 | 4 | 23 | 17.3764 | 84.84 |
| 17 | 36    | 38    | 65.3 TOB1_FlexIII    | 99.0 CIHGEK                                    | Propionamide(C) @1; Label: 13C(6)15N(2)(K) @7                                                                |                                | 0.00854352  | 877.465698 | 439.7401 | 877.457092 | 439.73584  | 2 | 10 | 14.1038 | 84.84 |
| 17 | 36    | 38    | 65.3 TOB1_FlexIII    | 99.0 CIHGEKVDPIEQASK                           | Propionamide(C) @1; Label: 13C(6)15N(2)(K) @7; Label: 13C(6)15N(2)(K) @17                                    | missed K-V @7                  | -0.00094369 | 1952.03613 | 651.686  | 1952.03723 | 651.68634  | 3 | 24 | 16.0995 | 84.84 |
| 17 | 36    | 38    | 65.3 TOB1_FlexIII    | 99.0 CIHGEKVDPIEQASK                           | Propionamide(C) @1; Label: 13C(6)15N(2)(K) @7; Label: 13C(6)15N(2)(K) @17                                    | missed K-V @7                  | -0.00094369 | 1952.03613 | 651.686  | 1952.03723 | 651.68634  | 3 | 24 | 16.1121 | 84.84 |
| 17 | 36    | 38    | 65.3 TOB1_FlexIII    | 99.0 CIHGEKVDPIEQASK                           | Propionamide(C) @1; Label: 13C(6)15N(2)(K) @7; Label: 13C(6)15N(2)(K) @17                                    | missed K-V @7                  | -0.00147813 | 1952.03565 | 977.0251 | 1952.03723 | 977.025879 | 2 | 26 | 16.1726 | 84.84 |
| 17 | 36    | 38    | 65.3 TOB1_FlexIII    | 99.0 CIHGEKVDPIEQASK                           | Propionamide(C) @1; Label: 13C(6)15N(2)(K) @7; Label: 13C(6)15N(2)(K) @17                                    | missed K-V @7                  | -0.00053132 | 1952.0365  | 489.0164 | 1952.03723 | 489.016571 | 4 | 17 | 16.1875 | 84.84 |
| 17 | 36    | 38    | 65.3 TOB1_FlexIII    | 99.0 CIHGEKVDPIEQASK                           | Propionamide(C) @1; Label: 13C(6)15N(2)(K) @7; Label: 13C(6)15N(2)(K) @17                                    | missed K-V @7                  | -0.00053132 | 1952.0365  | 489.0164 | 1952.03723 | 489.016571 | 4 | 17 | 16.19   | 84.84 |
| 17 | 36    | 38    | 65.3 TOB1_FlexIII    | 99.0 CIHGEKVDPIEQASK                           | Propionamide(C) @1; Label: 13C(6)15N(2)(K) @7; Label: 13C(6)15N(2)(K) @17                                    | missed K-V @7                  | -0.00053132 | 1952.0365  | 489.0164 | 1952.03723 | 489.016571 | 4 | 18 | 16.2051 | 84.84 |
| 17 | 36    | 38    | 65.3 TOB1_FlexIII    | 99.0 ESGLDIDDVR                                | Label: 13C(6)15N(4)(R) @10                                                                                   |                                | -0.00119124 | 1127.53223 | 564.7734 | 1127.53345 | 564.773987 | 2 | 12 | 16.5183 | 84.84 |
| 17 | 36    | 38    | 65.3 TOB1_FlexIII    | 99.0 ESGLDIDDVR                                | Label: 13C(6)15N(4)(R) @10                                                                                   |                                | -0.00119124 | 1127.53223 | 564.7734 | 1127.53345 | 564.773987 | 2 | 12 | 16.5459 | 84.84 |
| 17 | 36    | 38    | 65.3 TOB1_FlexIII    | 99.0 ESGLDIDDVR                                | Label: 13C(6)15N(4)(R) @10                                                                                   |                                | -0.00082503 | 1127.53272 | 564.7736 | 1127.53345 | 564.773987 | 2 | 11 | 16.5636 | 84.84 |
| 17 | 36    | 38    | 65.3 TOB1_FlexIII    | 99.0 ESGLDIDDVR                                | Label: 13C(6)15N(4)(R) @10                                                                                   |                                | -0.00058089 | 1127.53284 | 564.7737 | 1127.53345 | 564.773987 | 2 | 10 | 16.649  | 84.84 |
| 17 | 36    | 38    | 65.3 TOB1_FlexIII    | 99.0 GNLQDQLSVW/IDPFEVSYQIGEK                  | Label: 13C(6)15N(2)(K) @23                                                                                   |                                | 0.00364638  | 2641.31934 | 1321.667 | 2641.31543 | 1321.66504 | 2 | 23 | 20.3813 | 84.84 |
| 17 | 36    | 38    | 65.3 TOB1_FlexIII    | 99.0 GNLQDQLSVW/IDPFEVSYQIGEK                  | Label: 13C(6)15N(2)(K) @23                                                                                   |                                | 0.00204459  | 2641.31763 | 881.4465 | 2641.31543 | 881.445801 | 3 | 20 | 20.3915 | 84.84 |
| 17 | 36    | 38    | 65.3 TOB1_FlexIII    | 99.0 GNLQDQLSVW/IDPFEVSYQIGEK                  | Label: 13C(6)15N(2)(K) @23                                                                                   |                                | 0.00364638  | 2641.31934 | 1321.667 | 2641.31543 | 1321.66504 | 2 | 20 | 20.3967 | 84.84 |
| 17 | 36    | 38    | 65.3 TOB1_FlexIII    | 99.0 GNLQDQLSVW/IDPFEVSYQIGEK                  | Label: 13C(6)15N(2)(K) @23                                                                                   |                                | 0.00364638  | 2641.31934 | 1321.667 | 2641.31543 | 1321.66504 | 2 | 26 | 20.4042 | 84.84 |
| 17 | 36    | 38    | 65.3 TOB1_FlexIII    | 99.0 GNLQDQLSVW/IDPFEVSYQIGEK                  | Label: 13C(6)15N(2)(K) @23                                                                                   |                                | 0.00204459  | 2641.31763 | 881.4465 | 2641.31543 | 881.445801 | 3 | 19 | 20.4067 | 84.84 |
| 17 | 36    | 38    | 65.3 TOB1_FlexIII    | 99.0 GNLQDQLSVW/IDPFEVSYQIGEK                  | Label: 13C(6)15N(2)(K) @23                                                                                   |                                | 0.0137633   | 2641.32935 | 881.4504 | 2641.31543 | 881.445801 | 3 | 19 | 20.4474 | 84.84 |
| 17 | 36    | 38    | 65.3 TOB1_FlexIII    | 99.0 GNLQDQLSVW/IDPFEVSYQIGEK                  | Label: 13C(6)15N(2)(K) @23                                                                                   |                                | -0.00654622 | 2641.30933 | 1321.662 | 2641.31543 | 1321.66504 | 2 | 17 | 20.441  | 84.84 |
| 17 | 36    | 38    | 65.3 TOB1_FlexIII    | 99.0 GNLQDQLSVW/IDPFEVSYQIGEK                  | Deamidated(Q) @5; Label: 13C(6)15N(2)(K) @23                                                                 |                                | 0.0094407   | 2642.30933 | 1322.162 | 2642.29956 | 1322.1571  | 2 | 15 | 20.4537 | 84.84 |
| 17 | 36    | 38    | 65.3 TOB1_FlexIII    | 99.0 KKYEGHWYPEKPYK                            | Label: 13C(6)15N(2)(K) @1; Label: 13C(6)15N(2)(K) @2; Label: 13C(6)15N(2)(K) @11; Label: 13C(6)15N(2)(K) @14 | missed K-K @1; missed K-Y @2   | -0.0161601  | 1883.97131 | 472.0001 | 1883.98755 | 472.004181 | 4 | 12 | 14.3494 | 84.84 |
| 17 | 36    | 38    | 65.3 TOB1_FlexIII    | 99.0 KYEGHWYPEKPYK                             | Label: 13C(6)15N(2)(K) @1; Label: 13C(6)15N(2)(K) @10; Label: 13C(6)15N(2)(K) @13                            | missed K-Y @1                  | 0.0129707   | 1747.89136 | 437.9801 | 1747.87842 | 437.976898 | 4 | 12 | 14.8699 | 84.84 |
| 17 | 36    | 38    | 65.3 TOB1_FlexIII    | 99.0 KYEGHWYPEKPYK                             | Label: 13C(6)15N(2)(K) @1; Label: 13C(6)15N(2)(K) @10; Label: 13C(6)15N(2)(K) @13                            | missed K-Y @1                  | 0.00210639  | 1747.88049 | 437.9774 | 1747.87842 | 437.976898 | 4 | 13 | 14.8901 | 84.84 |
| 17 | 36    | 38    | 65.3 TOB1_FlexIII    | 99.0 KYEGHWYPEKPYK                             | Label: 13C(6)15N(2)(K) @1; Label: 13C(6)15N(2)(K) @10; Label: 13C(6)15N(2)(K) @13                            | missed K-Y @1                  | 0.00297576  | 1747.88135 | 583.6344 | 1747.87842 | 583.633423 | 3 | 10 | 14.967  | 84.84 |
| 17 | 36    | 38    | 65.3 TOB1_FlexIII    | 99.0 NSFNPEAQVFMPISDPASSVSSSPSPFPGHSAAVSPTFMFR | Deamidated(Q) @8; Label: 13C(6)15N(4)(R) @41                                                                 |                                | -0.00060311 | 4271.98096 | 1425.001 | 4271.98096 | 1425.00085 | 3 | 17 | 18.9192 | 84.84 |
| 17 | 36    | 38    | 65.3 TOB1_FlexIII    | 99.0 NSFNPEAQVFMPISDPASSVSSSPSPFPGHSAAVSPTFMFR | Label: 13C(6)15N(4)(R) @41                                                                                   |                                | -0.0025468  | 4270.97461 | 1068.751 | 4270.99658 | 1068.75647 | 4 | 18 | 18.9497 | 84.84 |
| 17 | 36    | 38    | 65.3 TOB1_FlexIII    | 99.0 NSFNPEAQVFMPISDPASSVSSSPSPFPGHSAAVSPTFMFR | Label: 13C(6)15N(4)(R) @41                                                                                   |                                | -0.0215468  | 4270.97461 | 1068.751 | 4270.99658 | 1068.75647 | 4 | 21 | 18.9522 | 84.84 |
| 17 | 36    | 38    | 65.3 TOB1_FlexIII    | 99.0 NSFNPEAQVFMPISDPASSVSSSPSPFPGHSAAVSPTFMFR | Label: 13C(6)15N(4)(R) @41                                                                                   |                                | -0.0215468  | 4270.97461 | 1068.751 | 4270.99658 | 1068.75647 | 4 | 19 | 18.9548 | 84.84 |
| 17 | 36    | 38    | 65.3 TOB1_FlexIII    | 99.0 NSFNPEAQVFMPISDPASSVSSSPSPFPGHSAAVSPTFMFR | Label: 13C(6)15N(4)(R) @41                                                                                   |                                | -0.0192736  | 4270.97607 | 1424.666 | 4270.99658 | 1424.67285 | 3 | 27 | 18.9751 | 84.84 |
| 17 | 36    | 38    | 65.3 TOB1_FlexIII    | 99.0 NSFNPEAQVFMPISDPASSVSSSPSPFPGHSAAVSPTFMFR | Label: 13C(6)15N(4)(R) @41                                                                                   |                                | -0.0167102  | 4270.979   | 1424.667 | 4270.99658 | 1424.67285 | 3 | 21 | 18.9777 | 84.84 |
| 17 | 36    | 38    | 65.3 TOB1_FlexIII    | 99.0 NSFNPEAQVFMPISDPASSVSSSPSPFPGHSAAVSPTFMFR | Label: 13C(6)15N(4)(R) @41                                                                                   |                                | -0.0167102  | 4270.979   | 1424.667 | 4270.99658 | 1424.67285 | 3 | 17 | 18.9906 | 84.84 |

|    |       |       |                    |                         |                                                                                                |                     |             |            |          |            |            |   |    |         |       |
|----|-------|-------|--------------------|-------------------------|------------------------------------------------------------------------------------------------|---------------------|-------------|------------|----------|------------|------------|---|----|---------|-------|
| 17 | 36    | 38    | 65.3 TOB1_FlexII   | 99.0 RVNIFGEELER        | Label: 13C(6)15N(4)(R)@ 1; Label: 13C(6)15N(4)(R)@ 11                                          | missed R-V@ 1       | -0.00147435 | 1380.7251  | 691.3698 | 1380.72644 | 691.370483 | 2 | 16 | 17.25   | 84.84 |
| 17 | 36    | 38    | 65.3 TOB1_FlexII   | 99.0 RVNIFGEELER        | Label: 13C(6)15N(4)(R)@ 1; Label: 13C(6)15N(4)(R)@ 11                                          | missed R-V@ 1       | -0.000864   | 1380.72571 | 691.3701 | 1380.72644 | 691.370483 | 2 | 16 | 17.2778 | 84.84 |
| 17 | 36    | 38    | 65.3 TOB1_FlexII   | 99.0 STQPLTFTTATFAATK   | Label: 13C(6)15N(2)(K)@ 16                                                                     |                     | -0.00232087 | 1692.87903 | 847.4468 | 1692.88135 | 847.447998 | 2 | 17 | 17.9742 | 84.84 |
| 17 | 36    | 38    | 65.3 TOB1_FlexII   | 99.0 STQPLTFTTATFAATK   | Label: 13C(6)15N(2)(K)@ 16                                                                     |                     | -0.00232087 | 1692.87903 | 847.4468 | 1692.88135 | 847.447998 | 2 | 17 | 17.9767 | 84.84 |
| 17 | 36    | 38    | 65.3 TOB1_FlexII   | 99.0 STQPLTFTTATFAATK   | Label: 13C(6)15N(2)(K)@ 16                                                                     |                     | -0.00232087 | 1692.87903 | 847.4468 | 1692.88135 | 847.447998 | 2 | 15 | 17.9818 | 84.84 |
| 17 | 36    | 38    | 65.3 TOB1_FlexII   | 99.0 STQPLTFTTATFAATK   | Label: 13C(6)15N(2)(K)@ 16                                                                     |                     | -0.00122224 | 1692.88025 | 847.4474 | 1692.88135 | 847.447998 | 2 | 15 | 18.0096 | 84.84 |
| 17 | 36    | 38    | 65.3 TOB1_FlexII   | 99.0 STQPLTFTTATFAATK   | Deamidated(Q)@ 3; Label: 13C(6)15N(2)(K)@ 16                                                   |                     | 0.0333636   | 1693.8988  | 565.6402 | 1693.86536 | 565.629089 | 3 | 13 | 18.0147 | 84.84 |
| 17 | 36    | 38    | 65.3 TOB1_FlexII   | 99.0 STQPLTFTTATFAATK   | Label: 13C(6)15N(2)(K)@ 16                                                                     |                     | -0.00110017 | 1692.88025 | 847.4474 | 1692.88135 | 847.447998 | 2 | 15 | 18.0808 | 84.84 |
| 17 | 36    | 38    | 65.3 TOB1_FlexII   | 99.0 STQPLTFTTATFAATK   | Deamidated(Q)@ 3; Label: 13C(6)15N(2)(K)@ 16                                                   |                     | -0.0725176  | 1693.79285 | 847.9037 | 1693.86536 | 847.940002 | 2 | 12 | 18.3108 | 84.84 |
| 17 | 36    | 38    | 65.3 TOB1_FlexII   | 99.0 STQPLTFTTATFAATK   | Deamidated(Q)@ 3; Label: 13C(6)15N(2)(K)@ 16                                                   |                     | -0.0725176  | 1693.79285 | 847.9037 | 1693.86536 | 847.940002 | 2 | 11 | 18.321  | 84.84 |
| 17 | 36    | 38    | 65.3 TOB1_FlexII   | 99.0 STQPLTFTTATFAATK   | Deamidated(Q)@ 3; Label: 13C(6)15N(2)(K)@ 16                                                   |                     | 0.0207442   | 1693.88623 | 847.9504 | 1693.86536 | 847.940002 | 2 | 12 | 18.4881 | 84.84 |
| 17 | 36    | 38    | 65.3 TOB1_FlexII   | 99.0 STQPLTFTTATFAATK   | Label: 13C(6)15N(2)(K)@ 16                                                                     |                     | -0.00110017 | 1692.88025 | 847.4474 | 1692.88135 | 847.447998 | 2 | 8  | 26.4126 | 84.84 |
| 17 | 36    | 38    | 65.3 TOB1_FlexII   | 99.0 STQPLTFTTATFAATK   | Label: 13C(6)15N(2)(K)@ 16                                                                     |                     | -0.00110017 | 1692.88025 | 847.4474 | 1692.88135 | 847.447998 | 2 | 8  | 26.4151 | 84.84 |
| 17 | 36    | 38    | 65.3 TOB1_FlexII   | 99.0 STQPLTFTTATFAATK   | Label: 13C(6)15N(2)(K)@ 16                                                                     |                     | -0.00110017 | 1692.88025 | 847.4474 | 1692.88135 | 847.447998 | 2 | 11 | 26.4177 | 84.84 |
| 17 | 36    | 38    | 65.3 TOB1_FlexII   | 99.0 TSPINGLNVNDLLK     | Deamidated(N)@ 11; Label: 13C(6)15N(2)(K)@ 15                                                  |                     | -0.0160171  | 1618.88611 | 810.4503 | 1618.9021  | 810.458374 | 2 | 15 | 18.8886 | 84.84 |
| 17 | 36    | 38    | 65.3 TOB1_FlexII   | 99.0 TSPINGLNVNDLLK     | Deamidated(N)@ 11; Label: 13C(6)15N(2)(K)@ 15                                                  |                     | -0.00966947 | 1618.89246 | 810.4535 | 1618.9021  | 810.458374 | 2 | 16 | 18.9624 | 84.84 |
| 17 | 36    | 38    | 65.3 TOB1_FlexII   | 99.0 TSPINGLNVNDLLK     | Label: 13C(6)15N(2)(K)@ 15                                                                     |                     | -0.00746595 | 1617.91065 | 809.9626 | 1617.91809 | 809.966309 | 2 | 17 | 19.2825 | 84.84 |
| 17 | 36    | 38    | 65.3 TOB1_FlexII   | 99.0 TSPINGLNVNDLLK     | Label: 13C(6)15N(2)(K)@ 15                                                                     |                     | -0.00758803 | 1617.91052 | 809.9625 | 1617.91809 | 809.966309 | 2 | 14 | 19.3433 | 84.84 |
| 17 | 36    | 38    | 65.3 TOB1_FlexII   | 99.0 TSPINGLNVNDLLK     | Label: 13C(6)15N(2)(K)@ 15                                                                     |                     | -0.00943396 | 1617.90869 | 540.3102 | 1617.91809 | 540.313294 | 3 | 13 | 19.3815 | 84.84 |
| 17 | 36    | 38    | 65.3 TOB1_FlexII   | 99.0 TSPINGLNVNDLLK     | Label: 13C(6)15N(2)(K)@ 15                                                                     |                     | -0.00718744 | 1609.89673 | 805.9556 | 1609.90393 | 805.959229 | 2 | 17 | 19.3866 | 84.84 |
| 17 | 36    | 38    | 65.3 TOB1_FlexII   | 99.0 TSPINGLNVNDLLK     | Label: 13C(6)15N(2)(K)@ 15                                                                     |                     | -0.00819838 | 1617.90991 | 809.9622 | 1617.91809 | 809.966309 | 2 | 18 | 19.3992 | 84.84 |
| 17 | 36    | 38    | 65.3 TOB1_FlexII   | 99.0 TSPINGLNVNDLLK     | Label: 13C(6)15N(2)(K)@ 15                                                                     |                     | -0.00819838 | 1617.90991 | 809.9622 | 1617.91809 | 809.966309 | 2 | 17 | 19.4017 | 84.84 |
| 17 | 36    | 38    | 65.3 TOB1_FlexII   | 99.0 TSPINGLNVNDLLK     | Label: 13C(6)15N(2)(K)@ 15                                                                     |                     | -0.00613806 | 1617.91199 | 540.3113 | 1617.91809 | 540.313294 | 3 | 15 | 19.4475 | 84.84 |
| 17 | 36    | 38    | 65.3 TOB1_FlexII   | 99.0 TSPINGLNVNDLLK     | Label: 13C(6)15N(2)(K)@ 15                                                                     |                     | -0.00844252 | 1617.90967 | 809.9621 | 1617.91809 | 809.966309 | 2 | 16 | 19.4932 | 84.84 |
| 17 | 36    | 38    | 65.3 TOB1_FlexII   | 99.0 TSPINGLNVNDLLK     | Label: 13C(6)15N(2)(K)@ 15                                                                     |                     | 0.00791491  | 1617.92603 | 809.9703 | 1617.91809 | 809.966309 | 2 | 18 | 19.7949 | 84.84 |
| 17 | 36    | 38    | 65.3 TOB1_FlexII   | 99.0 TSPINGLNVNDLLK     | Deamidated(N)@ 5; Label: 13C(6)15N(2)(K)@ 15                                                   |                     | 0.0238999   | 1618.92603 | 810.4703 | 1618.9021  | 810.458374 | 2 | 12 | 19.9167 | 84.84 |
| 17 | 36    | 38    | 65.3 TOB1_FlexII   | 99.0 TSPINGLNVNDLLK     | Label: 13C(6)15N(2)(K)@ 15                                                                     |                     | -0.00468774 | 1617.91345 | 809.964  | 1617.91809 | 809.966309 | 2 | 16 | 19.5092 | 84.84 |
| 17 | 36    | 38    | 65.3 TOB1_FlexII   | 99.0 TSPINGLNVNDLLK     | Label: 13C(6)15N(2)(K)@ 15                                                                     |                     | -0.0106692  | 1617.90747 | 809.961  | 1617.91809 | 809.966309 | 2 | 15 | 19.4712 | 84.84 |
| 17 | 36    | 38    | 65.3 TOB1_FlexII   | 99.0 VDPVIEQASK         | Label: 13C(6)15N(2)(K)@ 10                                                                     |                     | 0.00100032  | 1092.59168 | 547.3031 | 1092.5907  | 547.302612 | 2 | 12 | 15.1329 | 84.84 |
| 17 | 36    | 38    | 65.3 TOB1_FlexII   | 99.0 VDPVIEQASK         | Label: 13C(6)15N(2)(K)@ 10                                                                     |                     | 0.00100032  | 1092.59168 | 547.3031 | 1092.5907  | 547.302612 | 2 | 12 | 15.138  | 84.84 |
| 17 | 36    | 38    | 65.3 TOB1_FlexII   | 99.0 VDPVIEQASK         | Label: 13C(6)15N(2)(K)@ 10                                                                     |                     | 0.00161067  | 1092.59229 | 547.3034 | 1092.5907  | 547.302612 | 2 | 11 | 15.1657 | 84.84 |
| 17 | 36    | 38    | 65.3 TOB1_FlexII   | 99.0 VLYVDNNNGCELDCK    | Propionamide(C)@ 12; Label: 13C(6)15N(2)(K)@ 16                                                |                     | 0.00092333  | 1917.85144 | 959.933  | 1917.85059 | 959.932556 | 2 | 20 | 16.3184 | 84.84 |
| 17 | 36    | 38    | 65.3 TOB1_FlexII   | 99.0 VLYVDNNNGCELDCK    | Propionamide(C)@ 12; Label: 13C(6)15N(2)(K)@ 16                                                |                     | 0.00092333  | 1917.85144 | 959.933  | 1917.85059 | 959.932556 | 2 | 20 | 16.3235 | 84.84 |
| 17 | 36    | 38    | 65.3 TOB1_FlexII   | 99.0 VLYVDNNNGCELDCK    | Deamidated(N)@ 10; Propionamide(C)@ 12; Label: 13C(6)15N(2)(K)@ 16                             |                     | -0.00054776 | 1918.83411 | 960.4243 | 1918.8346  | 960.424561 | 2 | 19 | 16.4706 | 84.84 |
| 17 | 36    | 38    | 65.3 TOB1_FlexII   | 99.0 VLYVDNNNGCELDCKEIK | Propionamide(C)@ 12; Label: 13C(6)15N(2)(K)@ 16; Label: 13C(6)15N(2)(K)@ 19                    | missed K-E@ 16      | 0.00266414  | 2296.08911 | 766.3703 | 2296.08643 | 766.369385 | 3 | 17 | 16.5209 | 84.84 |
| 17 | 36    | 38    | 65.3 TOB1_FlexII   | 99.0 VLYVDNNNGCELDCKEIK | Deamidated(N)@ 7; Propionamide(C)@ 12; Label: 13C(6)15N(2)(K)@ 16; Label: 13C(6)15N(2)(K)@ 19  | missed K-E@ 16      | 0.00670038  | 2297.0791  | 766.7003 | 2297.07031 | 766.697388 | 3 | 14 | 16.5234 | 84.84 |
| 17 | 36    | 38    | 65.3 TOB1_FlexII   | 99.0 VLYVDNNNGCELDCKEIK | Deamidated(N)@ 10; Propionamide(C)@ 12; Label: 13C(6)15N(2)(K)@ 16; Label: 13C(6)15N(2)(K)@ 19 | missed K-E@ 16      | -0.00385799 | 2297.06738 | 1149.541 | 2297.07031 | 1149.54248 | 2 | 24 | 16.7067 | 84.84 |
| 17 | 36    | 38    | 65.3 TOB1_FlexII   | 99.0 VNIFGEELER         | Label: 13C(6)15N(4)(R)@ 10                                                                     |                     | -0.00143915 | 1214.61572 | 608.3151 | 1214.61707 | 608.315796 | 2 | 12 | 18.0957 | 84.84 |
| 17 | 36    | 38    | 65.3 TOB1_FlexII   | 99.0 VNIFGEELER         | Label: 13C(6)15N(4)(R)@ 10                                                                     |                     | -0.00143915 | 1214.61572 | 608.3151 | 1214.61707 | 608.315796 | 2 | 13 | 18.098  | 84.84 |
| 17 | 36    | 38    | 65.3 TOB1_FlexII   | 99.0 VNIFGEELER         | Label: 13C(6)15N(4)(R)@ 10                                                                     |                     | -0.00143915 | 1214.61572 | 608.3151 | 1214.61707 | 608.315796 | 2 | 12 | 18.1057 | 84.84 |
| 17 | 36    | 38    | 65.3 TOB1_FlexII   | 99.0 VNIFGEELER         | Label: 13C(6)15N(4)(R)@ 10                                                                     |                     | -0.00156122 | 1214.61548 | 608.315  | 1214.61707 | 608.315796 | 2 | 10 | 18.1615 | 84.84 |
| 17 | 36    | 38    | 65.3 TOB1_FlexII   | 99.0 YEGHWYPEKPYK       | Label: 13C(6)15N(2)(K)@ 9; Label: 13C(6)15N(2)(K)@ 12                                          |                     | 0.00134475  | 1611.77087 | 538.2642 | 1611.76929 | 538.263672 | 3 | 14 | 15.3758 | 84.84 |
| 17 | 36    | 38    | 65.3 TOB1_FlexII   | 99.0 YEGHWYPEKPYK       | Label: 13C(6)15N(2)(K)@ 9; Label: 13C(6)15N(2)(K)@ 12                                          |                     | 0.00134475  | 1611.77087 | 538.2642 | 1611.76929 | 538.263672 | 3 | 15 | 15.4361 | 84.84 |
| 17 | 36    | 38    | 65.3 TOB1_FlexII   | 99.0 YPTFLYK            | Label: 13C(6)15N(2)(K)@ 7                                                                      | cleaved N-Y@ N-term | -0.00061447 | 938.498657 | 470.2566 | 938.499329 | 470.256828 | 2 | 9  | 17.7815 | 84.84 |
| 18 | 32.93 | 34.93 | 58.8 CSNK1E_FlexII | 99.0 ALPPGPPTGATANR     | Label: 13C(6)15N(4)(R)@ 14                                                                     |                     | -0.0001233  | 1328.70752 | 665.361  | 1328.70764 | 665.361084 | 2 | 14 | 15.135  | 24.43 |
| 18 | 32.93 | 34.93 | 58.8 CSNK1E_FlexII | 99.0 DVKPDNFLMGLGK      | Label: 13C(6)15N(2)(K)@ 3; Label: 13C(6)15N(2)(K)@ 13                                          |                     | 0.00070145  | 1448.7677  | 725.3911 | 1448.76685 | 725.390686 | 2 | 21 | 18.4605 | 24.43 |
| 18 | 32.93 | 34.93 | 58.8 CSNK1E_FlexII | 99.0 FDDKPDYSYLK        | Label: 13C(6)15N(2)(K)@ 4; Label: 13C(6)15N(4)(R)@ 11                                          |                     | -0.00325431 | 1435.67041 | 479.5641 | 1435.67383 | 479.565216 | 3 | 13 | 16.4352 | 24.43 |
| 18 | 32.93 | 34.93 | 58.8 CSNK1E_FlexII | 99.0 GAPANVSSSDLTGR     | Label: 13C(6)15N(4)(R)@ 14                                                                     |                     | -0.00152321 | 1340.65442 | 671.3345 | 1340.65601 | 671.335266 | 2 | 18 | 15.3389 | 24.43 |
| 18 | 32.93 | 34.93 | 58.8 CSNK1E_FlexII | 99.0 GNLVYIIDFLGAK      | Label: 13C(6)15N(2)(K)@ 13                                                                     |                     | -0.00174381 | 1429.80432 | 715.9094 | 1429.80603 | 715.910278 | 2 | 17 | 20.1113 | 24.43 |
| 18 | 32.93 | 34.93 | 58.8 CSNK1E_FlexII | 99.0 GYPSEFSTYLNFCR     | Propionamide(C)@ 13; Label: 13C(6)15N(4)(R)@ 14                                                |                     | -0.00739445 | 1763.77783 | 882.8962 | 1763.78528 | 882.899902 | 2 | 17 | 18.982  | 24.43 |
| 18 | 32.93 | 34.93 | 58.8 CSNK1E_FlexII | 99.0 IPASQTSVPFDHLGK    | Label: 13C(6)15N(2)(K)@ 15                                                                     |                     | -0.00084745 | 1603.84424 | 535.622  | 1603.84497 | 535.622253 | 3 | 21 | 16.7026 | 24.43 |
| 18 | 32.93 | 34.93 | 58.8 CSNK1E_FlexII | 99.0 KGNLVYIIDFLGAK     | Label: 13C(6)15N(2)(K)@ 1; Label: 13C(6)15N(2)(K)@ 14                                          | missed K-G@ 1       | -0.0068398  | 1565.90845 | 783.9615 | 1565.91516 | 783.964905 | 2 | 25 | 19.2028 | 24.43 |
| 18 | 32.93 | 34.93 | 58.8 CSNK1E_FlexII | 99.0 KMSTIEPIELCK       | Label: 13C(6)15N(2)(K)@ 1; Propionamide(C)@ 10; Label: 13C(6)15N(2)(K)@ 11                     | missed K-M@ 1       | -0.00071063 | 1334.72644 | 668.3705 | 1334.7273  | 668.370911 | 2 | 17 | 16.9195 | 24.43 |
| 18 | 32.93 | 34.93 | 58.8 CSNK1E_FlexII | 99.0 MMOGGVGIPSIK       | Label: 13C(6)15N(2)(K)@ 12                                                                     |                     | -0.00015274 | 1224.6449  | 613.3297 | 1224.64502 | 613.329773 | 2 | 14 | 17.3679 | 24.43 |
| 18 | 32.93 | 34.93 | 58.8 CSNK1E_FlexII | 99.0 QGFSYDYVFDWNMLK    | Label: 13C(6)15N(2)(K)@ 15                                                                     |                     | -0.00075737 | 1919.86365 | 960.9391 | 1919.86438 | 960.939453 | 2 | 18 | 20.3499 | 24.43 |
| 18 | 32.93 | 34.93 | 58.8 CSNK1E_FlexII | 99.0 SAAEPVASTPASR      |                                                                                                |                     | 0.0057067   | 1242.62622 | 622.3204 | 1242.62048 | 622.317505 | 2 | 14 | 14.1358 | 24.43 |
| 18 | 32.93 | 34.93 | 58.8 CSNK1E_FlexII | 99.0 TKHPQLHIESK        | Label: 13C(6)15N(2)(K)@ 2; Label: 13C(6)15N(2)(K)@ 11                                          | missed K-H@ 2       | -0.00556591 | 1332.74292 | 334.193  | 1332.74854 | 334.194397 | 4 | 13 | 13.2305 | 24.43 |
| 18 | 32.93 | 34.93 | 58.8 CSNK1E_FlexII | 99.0 TVLLADQMISR        | Label: 13C(6)15N(4)(R)@ 12                                                                     |                     | -0.00628168 | 1368.76123 | 685.3879 | 1368.76746 | 685.390991 | 2 | 15 | 19.0707 | 24.43 |
| 18 | 32.93 | 34.93 | 58.8 CSNK1E_FlexII | 99.0 YASINTHLGIFQSR     | Label: 13C(6)15N(4)(R)@ 14                                                                     |                     | -0.00086536 | 1597.80786 | 799.9112 | 1597.80894 | 799.911682 | 2 | 23 | 16.2792 | 24.43 |
| 18 | 32.93 | 34.93 | 58.8 CSNK1E_FlexII | 99.0 ALPPGPPTGATANR     | Label: 13C(6)15N(4)(R)@ 14                                                                     |                     | -0.0001233  | 1328.70752 | 665.361  | 1328.70764 | 665.361084 | 2 | 14 | 15.1603 | 24.43 |
| 18 | 32.93 | 34.93 | 58.8 CSNK1E_FlexII | 99.0 ALPPGPPTGATANR     | Label: 13C(6)15N(4)(R)@ 14                                                                     |                     | -0.0001233  | 1328.7075  |          |            |            |   |    |         |       |

|    |       |       |                    |                                  |                                                                                   |                               |             |            |            |            |            |    |         |         |        |
|----|-------|-------|--------------------|----------------------------------|-----------------------------------------------------------------------------------|-------------------------------|-------------|------------|------------|------------|------------|----|---------|---------|--------|
| 18 | 32.93 | 34.93 | 58.8 CSNK1E_FlexII | 99.0 GAPANVSSSDLTGR              | Label: 13C(6)15N(4)(R)@ 14                                                        | -0.00933575                   | 1340.64673  | 671.3306   | 1340.65601 | 671.335266 | 2          | 17 | 15.3087 | 24.43   |        |
| 18 | 32.93 | 34.93 | 58.8 CSNK1E_FlexII | 99.0 GNLVYIDFGLAK                | Label: 13C(6)15N(2)(K)@ 13                                                        | -0.00040103                   | 1429.80566  | 715.9101   | 1429.80603 | 715.910278 | 2          | 17 | 20.1419 | 24.43   |        |
| 18 | 32.93 | 34.93 | 58.8 CSNK1E_FlexII | 99.0 GYPSEFSTYLNFCR              | Propionamide(C)@ 13; Label: 13C(6)15N(4)(R)@ 14                                   | -0.00739445                   | 1763.77783  | 882.8962   | 1763.78528 | 882.899902 | 2          | 15 | 18.9846 | 24.43   |        |
| 18 | 32.93 | 34.93 | 58.8 CSNK1E_FlexII | 99.0 IPASQTSVPDFDLHKG            | Label: 13C(6)15N(2)(K)@ 15                                                        | -0.00084745                   | 1603.84424  | 535.6222   | 1603.84497 | 535.622253 | 3          | 18 | 16.705  | 24.43   |        |
| 18 | 32.93 | 34.93 | 58.8 CSNK1E_FlexII | 99.0 KGNLVYIDFGLAK               | Label: 13C(6)15N(2)(K)@ 1; Label: 13C(6)15N(2)(K)@ 14                             | -0.0068398                    | 1565.90845  | 783.9615   | 1565.91516 | 783.964905 | 2          | 24 | 19.1952 | 24.43   |        |
| 18 | 32.93 | 34.93 | 58.8 CSNK1E_FlexII | 99.0 KGNLVYIDFGLAK               | Label: 13C(6)15N(2)(K)@ 1; Label: 13C(6)15N(2)(K)@ 14                             | -0.00549702                   | 1565.90991  | 783.9622   | 1565.91516 | 783.964905 | 2          | 23 | 19.2688 | 24.43   |        |
| 18 | 32.93 | 34.93 | 58.8 CSNK1E_FlexII | 99.0 KGNLVYIDFGLAK               | Label: 13C(6)15N(2)(K)@ 1; Label: 13C(6)15N(2)(K)@ 14                             | missed K-G@ 1                 | -0.00763249 | 1565.90735 | 522.9764   | 1565.91516 | 522.979004 | 3  | 13      | 19.1901 | 24.43  |
| 18 | 32.93 | 34.93 | 58.8 CSNK1E_FlexII | 99.0 KGNLVYIDFGLAK               | Label: 13C(6)15N(2)(K)@ 1; Label: 13C(6)15N(2)(K)@ 14                             | missed K-G@ 1                 | -0.00763249 | 1565.90735 | 522.9764   | 1565.91516 | 522.979004 | 3  | 13      | 19.2002 | 24.43  |
| 18 | 32.93 | 34.93 | 58.8 CSNK1E_FlexII | 99.0 KMSTPIEVLOCK                | Label: 13C(6)15N(2)(K)@ 1; Propionamide(C)@ 10; Label: 13C(6)15N(2)(K)@ 11        | missed K-G@ 1                 | -0.00071063 | 1334.72644 | 668.3705   | 1334.7273  | 668.370911 | 2  | 17      | 16.9498 | 24.43  |
| 18 | 32.93 | 34.93 | 58.8 CSNK1E_FlexII | 99.0 KMSTPIEVLOCK                | Label: 13C(6)15N(2)(K)@ 1; Propionamide(C)@ 10; Label: 13C(6)15N(2)(K)@ 11        | missed K-M@ 1                 | -0.00302921 | 1334.72412 | 445.9153   | 1334.7273  | 445.916382 | 3  | 12      | 16.9825 | 24.43  |
| 18 | 32.93 | 34.93 | 58.8 CSNK1E_FlexII | 99.0 MMOGGVGIPSIK                | Label: 13C(6)15N(2)(K)@ 12                                                        | 0.00167832                    | 1224.64673  | 613.3306   | 1224.64502 | 613.329773 | 2          | 14 | 17.3401 | 24.43   |        |
| 18 | 32.93 | 34.93 | 58.8 CSNK1E_FlexII | 99.0 MMOGGVGIPSIK                | Label: 13C(6)15N(2)(K)@ 12                                                        | -0.00015274                   | 1224.6449   | 613.3297   | 1224.64502 | 613.329773 | 2          | 13 | 17.3957 | 24.43   |        |
| 18 | 32.93 | 34.93 | 58.8 CSNK1E_FlexII | 99.0 MMOGGVGIPSIK                | Label: 13C(6)15N(2)(K)@ 12                                                        | 0.00045762                    | 1224.64551  | 613.33     | 1224.64502 | 613.329773 | 2          | 13 | 17.4411 | 24.43   |        |
| 18 | 32.93 | 34.93 | 58.8 CSNK1E_FlexII | 99.0 QGFSYDYVFDWNMLK             | Label: 13C(6)15N(2)(K)@ 15                                                        | -0.00075737                   | 1919.86365  | 960.9391   | 1919.86438 | 960.939453 | 2          | 17 | 20.3474 | 24.43   |        |
| 18 | 32.93 | 34.93 | 58.8 CSNK1E_FlexII | 99.0 QGFSYDYVFDWNMLK             | Label: 13C(6)15N(2)(K)@ 15                                                        | -0.00075737                   | 1919.86365  | 960.9391   | 1919.86438 | 960.939453 | 2          | 16 | 20.3652 | 24.43   |        |
| 18 | 32.93 | 34.93 | 58.8 CSNK1E_FlexII | 99.0 SAAEPVASTPASR               | Label: 13C(6)15N(4)(R)@ 13                                                        | -7.14E-05                     | 1252.62866  | 627.3216   | 1252.62866 | 627.321655 | 2          | 14 | 13.9896 | 24.43   |        |
| 18 | 32.93 | 34.93 | 58.8 CSNK1E_FlexII | 99.0 SAAEPVASTPASR               | Label: 13C(6)15N(4)(R)@ 13                                                        | 5.07E-05                      | 1252.62891  | 627.3217   | 1252.62866 | 627.321655 | 2          | 14 | 14.0173 | 24.43   |        |
| 18 | 32.93 | 34.93 | 58.8 CSNK1E_FlexII | 99.0 SAAEPVASTPASR               | Label: 13C(6)15N(4)(R)@ 13                                                        | -7.14E-05                     | 1252.62866  | 627.3216   | 1252.62866 | 627.321655 | 2          | 12 | 14.05   | 24.43   |        |
| 18 | 32.93 | 34.93 | 58.8 CSNK1E_FlexII | 99.0 SAAEPVASTPASR               | Label: 13C(6)15N(4)(R)@ 13                                                        | 0.00029486                    | 1252.62903  | 627.3218   | 1252.62866 | 627.321655 | 2          | 12 | 14.103  | 24.43   |        |
| 18 | 32.93 | 34.93 | 58.8 CSNK1E_FlexII | 99.0 TKHPQLHIESK                 | Label: 13C(6)15N(2)(K)@ 2; Label: 13C(6)15N(2)(K)@ 11                             | -0.00556591                   | 1332.74292  | 334.193    | 1332.74854 | 334.194397 | 4          | 12 | 13.233  | 24.43   |        |
| 18 | 32.93 | 34.93 | 58.8 CSNK1E_FlexII | 99.0 TKHPQLHIESK                 | Label: 13C(6)15N(2)(K)@ 2; Label: 13C(6)15N(2)(K)@ 11                             | missed K-H@ 2                 | -0.00471142 | 1332.74377 | 334.1932   | 1332.74854 | 334.194397 | 4  | 12      | 13.2735 | 24.43  |
| 18 | 32.93 | 34.93 | 58.8 CSNK1E_FlexII | 99.0 TVLLADQMISR                 | Label: 13C(6)15N(4)(R)@ 12                                                        | -0.00066642                   | 1368.76685  | 685.3907   | 1368.76746 | 685.390991 | 2          | 14 | 19.0454 | 24.43   |        |
| 18 | 32.93 | 34.93 | 58.8 CSNK1E_FlexII | 99.0 YASINTHLGIEQSR              | Label: 13C(6)15N(4)(R)@ 14                                                        | 0.00074363                    | 1597.80945  | 799.912    | 1597.80884 | 799.911682 | 2          | 20 | 16.2643 | 24.43   |        |
| 18 | 32.93 | 34.93 | 58.8 CSNK1E_FlexII | 99.0 YASINTHLGIEQSR              | Label: 13C(6)15N(4)(R)@ 14                                                        | -0.00206323                   | 1597.80664  | 533.6095   | 1597.80884 | 533.61023  | 3          | 14 | 16.2269 | 24.43   |        |
| 18 | 32.93 | 34.93 | 58.8 CSNK1E_FlexII | 99.0 YASINTHLGIEQSR              | Label: 13C(6)15N(4)(R)@ 14                                                        | -0.00206323                   | 1597.80664  | 533.6095   | 1597.80884 | 533.61023  | 3          | 13 | 16.232  | 24.43   |        |
| 18 | 32.93 | 34.93 | 58.8 CSNK1E_FlexII | 99.0 YASINTHLGIEQSR              | Label: 13C(6)15N(4)(R)@ 14                                                        | -0.00279565                   | 1597.80615  | 533.6093   | 1597.80884 | 533.61023  | 3          | 13 | 16.2618 | 24.43   |        |
| 18 | 32.93 | 34.93 | 58.8 CSNK1E_FlexII | 99.0 YASINTHLGIEQSR              | Label: 13C(6)15N(4)(R)@ 14                                                        | -0.00096459                   | 1597.80798  | 533.6099   | 1597.80884 | 533.61023  | 3          | 13 | 16.322  | 24.43   |        |
| 18 | 32.93 | 34.93 | 58.8 CSNK1E_FlexII | 99.0 YPTFLYK                     | Label: 13C(6)15N(2)(K)@ 7                                                         | -0.00061447                   | 938.498657  | 470.2566   | 938.499329 | 470.256928 | 2          | 9  | 17.7815 | 24.43   |        |
| 19 | 28    | 30    | 42.2 FKBP3_FlexII  | 99.0 ARLEIPEWAYGK                | Label: 13C(6)15N(4)(R)@ 2; Label: 13C(6)15N(2)(K)@ 13                             | -0.00904616                   | 1578.80713  | 790.4108   | 1578.81616 | 790.415344 | 2          | 17 | 17.5003 | 106.31  |        |
| 19 | 28    | 30    | 42.2 FKBP3_FlexII  | 99.0 ARLEIPEWAYGK                | Label: 13C(6)15N(4)(R)@ 2; Label: 13C(6)15N(2)(K)@ 13; Label: 13C(6)15N(2)(K)@ 14 | missed R-L@ 2; missed K-K@ 13 | 0.00086941  | 1714.92639 | 572.6494   | 1714.92529 | 572.649048 | 3  | 16      | 18.6769 | 106.31 |
| 19 | 28    | 30    | 42.2 FKBP3_FlexII  | 99.0 DHLVTAYNHLFETK              | Label: 13C(6)15N(2)(K)@ 14                                                        | 0.00211767                    | 1694.85291  | 848.4337   | 1694.85083 | 848.432678 | 2          | 21 | 17.1946 | 106.31  |        |
| 19 | 28    | 30    | 42.2 FKBP3_FlexII  | 99.0 ETKSEETLDEGPPK              | Label: 13C(6)15N(2)(K)@ 3; Label: 13C(6)15N(2)(K)@ 14                             | missed K-S@ 3                 | 0.00249666  | 1574.76733 | 788.3909   | 1574.76465 | 788.389587 | 2  | 21      | 14.3483 | 106.31 |
| 19 | 28    | 30    | 42.2 FKBP3_FlexII  | 99.0 FLQEHGSDSFLAEHK             | Label: 13C(6)15N(2)(K)@ 15                                                        | -0.00602645                   | 1751.83008  | 584.9506   | 1751.83582 | 584.952576 | 3          | 20 | 15.938  | 106.31  |        |
| 19 | 28    | 30    | 42.2 FKBP3_FlexII  | 99.0 GWDDEALLTMSK                | Label: 13C(6)15N(2)(K)@ 11                                                        | 0.00118494                    | 1257.6167   | 629.8156   | 1257.61548 | 629.815002 | 2          | 14 | 18.6784 | 106.31  |        |
| 19 | 28    | 30    | 42.2 FKBP3_FlexII  | 99.0 KGDVVHCWYTTGLQDGTVFDTNIQTSK | Label: 13C(6)15N(2)(K)@ 1; Propionamide(C)@ 7; Label: 13C(6)15N(2)(K)@ 28         | missed K-G@ 1                 | 0.00295215  | 3170.53467 | 793.6409   | 3170.53125 | 793.640137 | 4  | 19      | 26.6354 | 106.31 |
| 19 | 28    | 30    | 42.2 FKBP3_FlexII  | 99.0 LEIPEWAYGK                  | Label: 13C(6)15N(2)(K)@ 11                                                        | -0.00059126                   | 1341.66907  | 671.8418   | 1341.66968 | 671.842102 | 2          | 13 | 18.1151 | 106.31  |        |
| 19 | 28    | 30    | 42.2 FKBP3_FlexII  | 99.0 LEIPEWAYGK                  | Label: 13C(6)15N(2)(K)@ 11; Label: 13C(6)15N(2)(K)@ 12                            | -0.00028875                   | 1477.77844  | 493.6001   | 1477.77881 | 493.600189 | 3          | 12 | 17.2478 | 106.31  |        |
| 19 | 28    | 30    | 42.2 FKBP3_FlexII  | 99.0 SEETLDEGPPK                 | Label: 13C(6)15N(2)(K)@ 11                                                        | -1.63E-05                     | 1208.56531  | 605.2899   | 1208.56519 | 605.289856 | 2          | 13 | 17.4765 | 106.31  |        |
| 19 | 28    | 30    | 42.2 FKBP3_FlexII  | 99.0 TANKDHLVTAYNHLFETK          | Label: 13C(6)15N(2)(K)@ 4; Label: 13C(6)15N(2)(K)@ 18                             | 0.00203755                    | 2117.08984  | 706.7039   | 2117.08765 | 706.703186 | 3          | 19 | 16.6553 | 106.31  |        |
| 19 | 28    | 30    | 42.2 FKBP3_FlexII  | 99.0 TANKDHLVTAYNHLFETKR         | Label: 13C(6)15N(2)(K)@ 4; Label: 13C(6)15N(2)(K)@ 18; Label: 13C(6)15N(4)(R)@ 19 | missed K-D@ 4; missed K-R@ 18 | 0.015929    | 2283.21289 | 571.8105   | 2283.19702 | 571.806519 | 4  | 21      | 16.2714 | 106.31 |
| 19 | 28    | 30    | 42.2 FKBP3_FlexII  | 99.0 ARLEIPEWAYGK                | Label: 13C(6)15N(4)(R)@ 2; Label: 13C(6)15N(2)(K)@ 13                             | missed R-L@ 2                 | 0.0003982   | 1578.81641 | 527.2794   | 1578.81616 | 527.279297 | 3  | 17      | 17.5028 | 106.31 |
| 19 | 28    | 30    | 42.2 FKBP3_FlexII  | 99.0 ARLEIPEWAYGK                | Label: 13C(6)15N(4)(R)@ 2; Label: 13C(6)15N(2)(K)@ 13                             | missed R-L@ 2                 | 0.0003982   | 1578.81641 | 527.2794   | 1578.81616 | 527.279297 | 3  | 16      | 17.5053 | 106.31 |
| 19 | 28    | 30    | 42.2 FKBP3_FlexII  | 99.0 ARLEIPEWAYGK                | Label: 13C(6)15N(4)(R)@ 2; Label: 13C(6)15N(2)(K)@ 13                             | missed R-L@ 2                 | 0.00206226  | 1578.81824 | 790.4164   | 1578.81616 | 790.415344 | 2  | 17      | 17.5206 | 106.31 |
| 19 | 28    | 30    | 42.2 FKBP3_FlexII  | 99.0 ARLEIPEWAYGK                | Label: 13C(6)15N(4)(R)@ 2; Label: 13C(6)15N(2)(K)@ 13                             | missed R-L@ 2                 | 0.00076441  | 1578.81665 | 527.2795   | 1578.81616 | 527.279297 | 3  | 16      | 17.5383 | 106.31 |
| 19 | 28    | 30    | 42.2 FKBP3_FlexII  | 99.0 ARLEIPEWAYGK                | Label: 13C(6)15N(4)(R)@ 2; Label: 13C(6)15N(2)(K)@ 13                             | missed R-L@ 2                 | 0.00181812  | 1578.81812 | 790.4163   | 1578.81616 | 790.415344 | 2  | 16      | 17.5485 | 106.31 |
| 19 | 28    | 30    | 42.2 FKBP3_FlexII  | 99.0 ARLEIPEWAYGKK               | Label: 13C(6)15N(4)(R)@ 2; Label: 13C(6)15N(2)(K)@ 13; Label: 13C(6)15N(2)(K)@ 14 | missed R-L@ 2; missed K-K@ 13 | 0.00086941  | 1714.92639 | 572.6494   | 1714.92529 | 572.649048 | 3  | 17      | 16.8718 | 106.31 |
| 19 | 28    | 30    | 42.2 FKBP3_FlexII  | 99.0 ARLEIPEWAYGKK               | Label: 13C(6)15N(4)(R)@ 2; Label: 13C(6)15N(2)(K)@ 13; Label: 13C(6)15N(2)(K)@ 14 | missed R-L@ 2; missed K-K@ 13 | 0.00244022  | 1714.92773 | 429.7392   | 1714.92529 | 429.738586 | 4  | 14      | 16.8466 | 106.31 |
| 19 | 28    | 30    | 42.2 FKBP3_FlexII  | 99.0 ARLEIPEWAYGKK               | Label: 13C(6)15N(4)(R)@ 2; Label: 13C(6)15N(2)(K)@ 13; Label: 13C(6)15N(2)(K)@ 14 | missed R-L@ 2; missed K-K@ 13 | 0.00244022  | 1714.92773 | 429.7392   | 1714.92529 | 429.738586 | 4  | 13      | 16.8491 | 106.31 |
| 19 | 28    | 30    | 42.2 FKBP3_FlexII  | 99.0 DHLVTAYNHLFETK              | Label: 13C(6)15N(2)(K)@ 14                                                        | 0.00211767                    | 1694.85291  | 848.4337   | 1694.85083 | 848.432678 | 2          | 22 | 17.1821 | 106.31  |        |
| 19 | 28    | 30    | 42.2 FKBP3_FlexII  | 99.0 ETKSEETLDEGPPK              | Label: 13C(6)15N(2)(K)@ 3; Label: 13C(6)15N(2)(K)@ 14                             | missed K-S@ 3                 | 0.00486093  | 1574.76941 | 525.9304   | 1574.76465 | 525.928833 | 3  | 15      | 14.3053 | 106.31 |
| 19 | 28    | 30    | 42.2 FKBP3_FlexII  | 99.0 FLQEHGSDSFLAEHK             | Label: 13C(6)15N(2)(K)@ 15                                                        | 0.00019914                    | 1751.83594  | 584.9526   | 1751.83582 | 584.952576 | 3          | 21 | 15.9581 | 106.31  |        |
| 19 | 28    | 30    | 42.2 FKBP3_FlexII  | 99.0 FLQEHGSDSFLAEHK             | Label: 13C(6)15N(2)(K)@ 15                                                        | 0.00019914                    | 1751.83594  | 584.9526   | 1751.83582 | 584.952576 | 3          | 20 | 15.9682 | 106.31  |        |
| 19 | 28    | 30    | 42.2 FKBP3_FlexII  | 99.0 FLQEHGSDSFLAEHK             | Label: 13C(6)15N(2)(K)@ 15                                                        | 1.60E-05                      | 1751.83594  | 584.9526   | 1751.83582 | 584.952576 | 3          | 16 | 16.0008 | 106.31  |        |
| 19 | 28    | 30    | 42.2 FKBP3_FlexII  | 99.0 FLQEHGSDSFLAEHK             | Label: 13C(6)15N(2)(K)@ 15                                                        | 0.00308391                    | 1751.83911  | 876.9268   | 1751.83582 | 876.925171 | 2          | 23 | 16.0209 | 106.31  |        |
| 19 | 28    | 30    | 42.2 FKBP3_FlexII  | 99.0 FLQEHGSDSFLAEHK             | Label: 13C(6)15N(2)(K)@ 15                                                        | 0.00308391                    | 1751.83911  | 876.9268   | 1751.83582 | 876.925171 | 2          | 23 | 16.0258 | 106.31  |        |
| 19 | 28    | 30    | 42.2 FKBP3_FlexII  | 99.0 FLQEHGSDSFLAEHK             | Label: 13C(6)15N(2)(K)@ 15                                                        | 0.00587542                    | 1751.8418   | 584.9545   | 1751.83582 | 584.952576 | 3          | 16 | 26.6125 | 106.31  |        |
| 19 | 28    | 30    | 42.2 FKBP3_FlexII  | 99.0 FLQEHGSDSFLAEHK             | Label: 13C(6)15N(2)(K)@ 15                                                        | 0.00587542                    | 1751.8418   | 584.9545   | 1751.83582 | 584.952576 | 3          | 16 | 26.6252 | 106.31  |        |
| 19 | 28    | 30    | 42.2 FKBP3_FlexII  | 99.0 FLQEHGSDSFLAEHK             | Label: 13C(6)15N(2)(K)@ 15                                                        | -0.00048836                   | 1751.83533  | 438.9661   | 1751.83582 | 438.966248 | 4          | 14 | 15.9882 | 106.31  |        |
| 19 | 28    | 30    | 42.2 FKBP3_FlexII  | 99.0 FLQEHGSDSFLAEHK             | Label: 13C(6)15N(2)(K)@ 15                                                        | 0.0163574                     | 1751.85217  | 438.9703   | 1751.83582 | 438.966248 | 4          | 13 | 15.9606 | 106.31  |        |
|    |       |       |                    |                                  |                                                                                   |                               |             |            |            |            |            |    |         |         |        |

|    |       |       |                     |                                             |                                                                                                          |                                  |             |            |          |            |            |   |    |         |        |
|----|-------|-------|---------------------|---------------------------------------------|----------------------------------------------------------------------------------------------------------|----------------------------------|-------------|------------|----------|------------|------------|---|----|---------|--------|
| 19 | 28    | 30    | 42.2 FKBP3_FlexIII  | 99.0 LEIEPEWAYGKK                           | Label: 13C(6)15N(2)(K) @ 11; Label: 13C(6)15N(2)(K) @ 12                                                 | missed K-K @ 11                  | -0.00028875 | 1477.77844 | 493.6001 | 1477.77881 | 493.600189 | 3 | 12 | 17.2578 | 106.31 |
| 19 | 28    | 30    | 42.2 FKBP3_FlexIII  | 99.0 SEETLDEGPPK                            | Label: 13C(6)15N(2)(K) @ 11                                                                              |                                  | -1.63E-05   | 1208.56531 | 605.2899 | 1208.56519 | 605.289856 | 2 | 13 | 14.7338 | 106.31 |
| 19 | 28    | 30    | 42.2 FKBP3_FlexIII  | 99.0 SEETLDEGPPK                            | Label: 13C(6)15N(2)(K) @ 11                                                                              |                                  | 0.00022788  | 1208.56543 | 605.29   | 1208.56519 | 605.289856 | 2 | 13 | 14.7666 | 106.31 |
| 19 | 28    | 30    | 42.2 FKBP3_FlexIII  | 99.0 TANKDHLVTAYNHLFETK                     | Label: 13C(6)15N(2)(K) @ 4; Label: 13C(6)15N(2)(K) @ 18                                                  | missed K-D @ 4                   | 0.00226558  | 2117.09009 | 530.2798 | 2117.08765 | 530.279175 | 4 | 18 | 16.6256 | 106.31 |
| 19 | 28    | 30    | 42.2 FKBP3_FlexIII  | 99.0 TANKDHLVTAYNHLFETK                     | Label: 13C(6)15N(2)(K) @ 4; Label: 13C(6)15N(2)(K) @ 18                                                  | missed K-D @ 4                   | 0.00226558  | 2117.09009 | 530.2798 | 2117.08765 | 530.279175 | 4 | 18 | 16.6279 | 106.31 |
| 19 | 28    | 30    | 42.2 FKBP3_FlexIII  | 99.0 TANKDHLVTAYNHLFETK                     | Label: 13C(6)15N(2)(K) @ 4; Label: 13C(6)15N(2)(K) @ 18                                                  | missed K-D @ 4                   | 0.00226558  | 2117.09009 | 530.2798 | 2117.08765 | 530.279175 | 4 | 18 | 16.6327 | 106.31 |
| 19 | 28    | 30    | 42.2 FKBP3_FlexIII  | 99.0 TANKDHLVTAYNHLFETK                     | Label: 13C(6)15N(2)(K) @ 4; Label: 13C(6)15N(2)(K) @ 18                                                  | missed K-D @ 4                   | 0.00203755  | 2117.08984 | 706.7039 | 2117.08765 | 706.703186 | 3 | 22 | 16.6804 | 106.31 |
| 19 | 28    | 30    | 42.2 FKBP3_FlexIII  | 99.0 TANKDHLVTAYNHLFETK                     | Deamidated(N) @ 3; Label: 13C(6)15N(2)(K) @ 4; Label: 13C(6)15N(2)(K) @ 18                               | missed K-D @ 4                   | 0.0285825   | 2118.10034 | 707.0407 | 2118.07178 | 707.031189 | 3 | 14 | 16.8304 | 106.31 |
| 19 | 28    | 30    | 42.2 FKBP3_FlexIII  | 99.0 TANKDHLVTAYNHLFETK                     | Label: 13C(6)15N(2)(K) @ 4; Label: 13C(6)15N(2)(K) @ 18                                                  | missed K-D @ 4                   | -0.0224393  | 2117.06494 | 424.4203 | 2117.08765 | 424.424805 | 5 | 12 | 16.7232 | 106.31 |
| 19 | 28    | 30    | 42.2 FKBP3_FlexIII  | 99.0 TANKDHLVTAYNHLFETKR                    | Label: 13C(6)15N(2)(K) @ 4; Deamidated(N) @ 12; Label: 13C(6)15N(2)(K) @ 18; Label: 13C(6)15N(4)(R) @ 19 | missed K-D @ 4; missed K-R @ 18  | 0.0319149   | 2284.21289 | 572.0605 | 2284.18115 | 572.052551 | 4 | 14 | 16.2613 | 106.31 |
| 19 | 28    | 30    | 42.2 FKBP3_FlexIII  | 99.0 YPTFLYK                                | Label: 13C(6)15N(2)(K) @ 7                                                                               | cleaved D-Y @ N-term             | -0.00061447 | 938.498657 | 470.2566 | 938.499329 | 470.256928 | 2 | 9  | 17.7815 | 106.31 |
| 24 | 19.83 | 21.83 | 48.3 FOS_FlexIII    | 99.0 APHPFGVPAPSAGAYS                       | Label: 13C(6)15N(4)(R) @ 17                                                                              |                                  | 0.00337407  | 1690.84888 | 846.4317 | 1690.84546 | 846.430054 | 2 | 20 | 16.3714 | 136.39 |
| 24 | 19.83 | 21.83 | 48.3 FOS_FlexIII    | 99.0 ELTDTLQAETDQLEDEK                      | Label: 13C(6)15N(2)(K) @ 17                                                                              |                                  | 0.00339263  | 1984.92383 | 993.4692 | 1984.92041 | 993.467468 | 2 | 22 | 17.7563 | 136.39 |
| 24 | 19.83 | 21.83 | 48.3 FOS_FlexIII    | 99.0 ELTDTLQAETDQLEDEKSALQTEIANLLK          | Label: 13C(6)15N(2)(K) @ 17; Label: 13C(6)15N(2)(K) @ 29                                                 | missed K-S @ 17                  | -0.00898575 | 3274.65503 | 819.671  | 3274.66382 | 819.673218 | 4 | 20 | 20.4495 | 136.39 |
| 24 | 19.83 | 21.83 | 48.3 FOS_FlexIII    | 99.0 GKVEQLSPREEEK                          | Label: 13C(6)15N(2)(K) @ 2; Label: 13C(6)15N(2)(K) @ 13                                                  | missed K-V @ 2                   | 0.00069643  | 1516.75989 | 759.3872 | 1516.75916 | 759.386841 | 2 | 20 | 14.2518 | 136.39 |
| 24 | 19.83 | 21.83 | 48.3 FOS_FlexIII    | 99.0 GKVEQLSPREEEKR                         | Label: 13C(6)15N(2)(K) @ 2; Label: 13C(6)15N(2)(K) @ 13; Label: 13C(6)15N(4)(R) @ 14                     | missed K-V @ 2; missed K-R @ 13  | -0.0101078  | 1682.8584  | 561.9601 | 1682.86853 | 561.96344  | 3 | 18 | 13.9407 | 136.39 |
| 24 | 19.83 | 21.83 | 48.3 FOS_FlexIII    | 99.0 SALQTEIANLLK                           | Label: 13C(6)15N(2)(K) @ 12                                                                              |                                  | -0.00344424 | 1307.75073 | 654.8826 | 1307.75403 | 654.884277 | 2 | 13 | 19.7999 | 136.39 |
| 24 | 19.83 | 21.83 | 48.3 FOS_FlexIII    | 99.0 VEQLSPREEEKKR                          | Label: 13C(6)15N(2)(K) @ 11; Label: 13C(6)15N(4)(R) @ 12; Label: 13C(6)15N(4)(R) @ 13                    | missed K-R @ 11; missed R-R @ 12 | 0.00023255  | 1655.84753 | 828.931  | 1655.84729 | 828.930098 | 2 | 16 | 13.8979 | 136.39 |
| 24 | 19.83 | 21.83 | 48.3 FOS_FlexIII    | 99.0 APHPFGVPAPSAGAYS                       | Label: 13C(6)15N(4)(R) @ 17                                                                              |                                  | 0.00337407  | 1690.84888 | 846.4317 | 1690.84546 | 846.430054 | 2 | 19 | 16.3663 | 136.39 |
| 24 | 19.83 | 21.83 | 48.3 FOS_FlexIII    | 99.0 APHPFGVPAPSAGAYS                       | Label: 13C(6)15N(4)(R) @ 17                                                                              |                                  | 1.99E-05    | 1690.84534 | 564.6224 | 1690.84546 | 564.622437 | 3 | 16 | 16.2969 | 136.39 |
| 24 | 19.83 | 21.83 | 48.3 FOS_FlexIII    | 99.0 APHPFGVPAPSAGAYS                       | Label: 13C(6)15N(4)(R) @ 17                                                                              |                                  | 1.99E-05    | 1690.84534 | 564.6224 | 1690.84546 | 564.622437 | 3 | 16 | 16.3218 | 136.39 |
| 24 | 19.83 | 21.83 | 48.3 FOS_FlexIII    | 99.0 APHPFGVPAPSAGAYS                       | Label: 13C(6)15N(4)(R) @ 17                                                                              |                                  | -0.00089564 | 1690.84436 | 564.6221 | 1690.84546 | 564.622437 | 3 | 16 | 16.3637 | 136.39 |
| 24 | 19.83 | 21.83 | 48.3 FOS_FlexIII    | 99.0 APHPFGVPAPSAGAYS                       | Label: 13C(6)15N(4)(R) @ 17                                                                              |                                  | 1.99E-05    | 1690.84534 | 564.6224 | 1690.84546 | 564.622437 | 3 | 15 | 16.2944 | 136.39 |
| 24 | 19.83 | 21.83 | 48.3 FOS_FlexIII    | 99.0 ELTDTLQAETDQLEDEK                      | Label: 13C(6)15N(2)(K) @ 17                                                                              |                                  | 0.00827546  | 1984.92871 | 993.4716 | 1984.92041 | 993.467468 | 2 | 22 | 17.7133 | 136.39 |
| 24 | 19.83 | 21.83 | 48.3 FOS_FlexIII    | 99.0 ELTDTLQAETDQLEDEK                      | Deamidated(Q) @ 7; Label: 13C(6)15N(2)(K) @ 17                                                           |                                  | 0.0242636   | 1985.92871 | 993.9716 | 1985.90442 | 993.959473 | 2 | 15 | 17.7159 | 136.39 |
| 24 | 19.83 | 21.83 | 48.3 FOS_FlexIII    | 99.0 ELTDTLQAETDQLEDEKSALQTEIANLLK          | Deamidated(Q) @ 12; Label: 13C(6)15N(2)(K) @ 17; Label: 13C(6)15N(2)(K) @ 29                             | missed K-S @ 17                  | 0.00638923  | 3275.65405 | 1092.892 | 3275.64795 | 1092.88989 | 3 | 21 | 20.3297 | 136.39 |
| 24 | 19.83 | 21.83 | 48.3 FOS_FlexIII    | 99.0 ELTDTLQAETDQLEDEKSALQTEIANLLK          | Label: 13C(6)15N(2)(K) @ 17; Label: 13C(6)15N(2)(K) @ 29                                                 | missed K-S @ 17                  | -0.00092908 | 3274.66284 | 819.673  | 3274.66382 | 819.673218 | 4 | 21 | 20.4596 | 136.39 |
| 24 | 19.83 | 21.83 | 48.3 FOS_FlexIII    | 99.0 ELTDTLQAETDQLEDEKSALQTEIANLLK          | Label: 13C(6)15N(2)(K) @ 17; Label: 13C(6)15N(2)(K) @ 29                                                 | missed K-S @ 17                  | -0.00092908 | 3274.66284 | 819.673  | 3274.66382 | 819.673218 | 4 | 20 | 20.4699 | 136.39 |
| 24 | 19.83 | 21.83 | 48.3 FOS_FlexIII    | 99.0 ELTDTLQAETDQLEDEKSALQTEIANLLK          | Deamidated(Q) @ 12; Label: 13C(6)15N(2)(K) @ 17; Label: 13C(6)15N(2)(K) @ 29                             | missed K-S @ 17                  | 0.0301578   | 3275.67822 | 1092.9   | 3275.64795 | 1092.88989 | 3 | 21 | 20.3859 | 136.39 |
| 24 | 19.83 | 21.83 | 48.3 FOS_FlexIII    | 99.0 ELTDTLQAETDQLEDEKSALQTEIANLLK          | Label: 13C(6)15N(2)(K) @ 17; Label: 13C(6)15N(2)(K) @ 29                                                 | missed K-S @ 17                  | -0.00572382 | 3274.65845 | 1092.56  | 3274.66382 | 1092.56189 | 3 | 18 | 20.3936 | 136.39 |
| 24 | 19.83 | 21.83 | 48.3 FOS_FlexIII    | 99.0 ELTDTLQAETDQLEDEKSALQTEIANLLK          | Deamidated(Q) @ 12; Label: 13C(6)15N(2)(K) @ 17; Label: 13C(6)15N(2)(K) @ 29                             | missed K-S @ 17                  | 0.010926    | 3275.6604  | 1092.894 | 3275.64795 | 1092.88989 | 3 | 21 | 20.4793 | 136.39 |
| 24 | 19.83 | 21.83 | 48.3 FOS_FlexIII    | 99.0 ELTDTLQAETDQLEDEKSALQTEIANLLK          | Deamidated(Q) @ 12; Label: 13C(6)15N(2)(K) @ 17; Label: 13C(6)15N(2)(K) @ 29                             | missed K-S @ 17                  | 0.0383399   | 3275.68701 | 1092.903 | 3275.64795 | 1092.88989 | 3 | 22 | 20.4413 | 136.39 |
| 24 | 19.83 | 21.83 | 48.3 FOS_FlexIII    | 99.0 ELTDTLQAETDQLEDEKSALQTEIANLLK          | Label: 13C(6)15N(2)(K) @ 17; Label: 13C(6)15N(2)(K) @ 29                                                 | missed K-S @ 17                  | 0.00245295  | 3274.66724 | 1092.563 | 3274.66382 | 1092.56189 | 3 | 19 | 20.4515 | 136.39 |
| 24 | 19.83 | 21.83 | 48.3 FOS_FlexIII    | 99.0 ELTDTLQAETDQLEDEKSALQTEIANLLK          | Label: 13C(6)15N(2)(K) @ 17; Label: 13C(6)15N(2)(K) @ 29                                                 | missed K-S @ 17                  | 0.000533    | 3274.66431 | 1092.562 | 3274.66382 | 1092.56189 | 3 | 16 | 20.2965 | 136.39 |
| 24 | 19.83 | 21.83 | 48.3 FOS_FlexIII    | 99.0 GKVEQLSPREEEK                          | Label: 13C(6)15N(2)(K) @ 2; Label: 13C(6)15N(2)(K) @ 13                                                  | missed K-V @ 2                   | 0.00069643  | 1516.75989 | 759.3872 | 1516.75916 | 759.386841 | 2 | 21 | 14.262  | 136.39 |
| 24 | 19.83 | 21.83 | 48.3 FOS_FlexIII    | 99.0 GKVEQLSPREEEK                          | Label: 13C(6)15N(2)(K) @ 2; Label: 13C(6)15N(2)(K) @ 13                                                  | missed K-V @ 2                   | 0.0008185   | 1516.76013 | 759.3873 | 1516.75916 | 759.386841 | 2 | 19 | 14.2898 | 136.39 |
| 24 | 19.83 | 21.83 | 48.3 FOS_FlexIII    | 99.0 SALQTEIANLLK                           | Deamidated(Q) @ 4; Label: 13C(6)15N(2)(K) @ 12                                                           |                                  | 0.00790206  | 1308.74585 | 655.3802 | 1308.73804 | 655.376282 | 2 | 10 | 19.7644 | 136.39 |
| 24 | 19.83 | 21.83 | 48.3 FOS_FlexIII    | 99.0 YPTFLYK                                | Label: 13C(6)15N(2)(K) @ 7                                                                               | cleaved L-Y @ N-term             | -0.00061447 | 938.498657 | 470.2566 | 938.499329 | 470.256928 | 2 | 9  | 17.7815 | 136.39 |
| 26 | 19.01 | 21.04 | 68.3 PPP1R2_FlexIII | 99.0 DLHDDDEEEMLETADGESMNTTEESNQGSTPSDQQQNK | Label: 13C(6)15N(2)(K) @ 38                                                                              |                                  | 0.00613986  | 4275.68604 | 1426.236 | 4275.68164 | 1426.2345  | 3 | 36 | 16.7875 | 212.16 |
| 26 | 19.01 | 21.04 | 68.3 PPP1R2_FlexIII | 99.0 IQEOESSGEEDSLSPEER                     | Label: 13C(6)15N(4)(R) @ 19                                                                              |                                  | 0.0163094   | 2172.93335 | 1087.474 | 2172.91699 | 1087.46582 | 2 | 28 | 15.1076 | 212.16 |
| 26 | 19.01 | 21.04 | 68.3 PPP1R2_FlexIII | 99.0 IQEOESSGEEDSLSPEEREK                   | Label: 13C(6)15N(4)(R) @ 19; Label: 13C(6)15N(2)(K) @ 21                                                 | missed R-E @ 19                  | 0.0151486   | 2438.08398 | 813.7019 | 2438.06885 | 813.696838 | 3 | 20 | 14.681  | 212.16 |
| 26 | 19.01 | 21.04 | 68.3 PPP1R2_FlexIII | 99.0 KLA AAEGLEPK                           | Label: 13C(6)15N(2)(K) @ 1; Label: 13C(6)15N(2)(K) @ 11                                                  | missed K-L @ 1                   | 0.00081869  | 1141.6687  | 571.8416 | 1141.66773 | 571.841187 | 2 | 18 | 15.0512 | 212.16 |
| 26 | 19.01 | 21.04 | 68.3 PPP1R2_FlexIII | 99.0 KLHYNEGLNIK                            | Label: 13C(6)15N(2)(K) @ 1; Label: 13C(6)15N(2)(K) @ 11                                                  | missed K-L @ 1                   | -0.00035516 | 1343.75293 | 672.8837 | 1343.75317 | 672.883911 | 2 | 19 | 15.318  | 212.16 |
| 26 | 19.01 | 21.04 | 68.3 PPP1R2_FlexIII | 99.0 LAA AEGLEPK                            | Label: 13C(6)15N(2)(K) @ 10                                                                              |                                  | -0.00042042 | 1005.55829 | 503.7864 | 1005.55859 | 503.786591 | 2 | 14 | 15.6698 | 212.16 |
| 26 | 19.01 | 21.04 | 68.3 PPP1R2_FlexIII | 99.0 LHYNEGLNIK                             | Label: 13C(6)15N(2)(K) @ 10                                                                              |                                  | 0.00109129  | 1207.64502 | 604.8298 | 1207.64404 | 604.829285 | 2 | 16 | 15.8883 | 212.16 |
| 26 | 19.01 | 21.04 | 68.3 PPP1R2_FlexIII | 99.0 TSTTSSMVASAEQPR                        |                                                                                                          |                                  | 0.00416453  | 1551.72412 | 776.8693 | 1551.71985 | 776.867249 | 2 | 18 | 15.4585 | 212.16 |
| 26 | 19.01 | 21.04 | 68.3 PPP1R2_FlexIII | 99.0 WDEMILATYHPADKYGLMK                    | Label: 13C(6)15N(2)(K) @ 15; Label: 13C(6)15N(2)(K) @ 21                                                 | missed K-D @ 15                  | 0.00368685  | 2526.19336 | 843.0717 | 2526.18945 | 843.070435 | 3 | 23 | 18.2781 | 212.16 |
| 26 | 19.01 | 21.04 | 68.3 PPP1R2_FlexIII | 99.0 DLHDDDEEEMLETADGESMNTTEESNQGSTPSDQQQNK | Deamidated(N) @ 21; Label: 13C(6)15N(2)(K) @ 38                                                          |                                  | 0.0420294   | 4276.70654 | 1426.576 | 4276.66553 | 1426.5625  | 3 | 31 | 16.7672 | 212.16 |
| 26 | 19.01 | 21.04 | 68.3 PPP1R2_FlexIII | 99.0 DLHDDDEEEMLETADGESMNTTEESNQGSTPSDQQQNK | Deamidated(N) @ 21; Label: 13C(6)15N(2)(K) @ 38                                                          |                                  | 0.0409056   | 4276.70654 | 1070.184 | 4276.66553 | 1070.17371 | 4 | 27 | 16.7977 | 212.16 |
| 26 | 19.01 | 21.04 | 68.3 PPP1R2_FlexIII | 99.0 DLHDDDEEEMLETADGESMNTTEESNQGSTPSDQQQNK | Label: 13C(6)15N(2)(K) @ 38                                                                              |                                  | 0.0249136   | 4275.70654 | 1069.934 | 4275.68164 | 1069.92761 | 4 | 29 | 16.8256 | 212.16 |
| 26 | 19.01 | 21.04 | 68.3 PPP1R2_FlexIII | 99.0 DLHDDDEEEMLETADGESMNTTEESNQGSTPSDQQQNK | Label: 13C(6)15N(2)(K) @ 38                                                                              |                                  | 0.0189573   | 4275.70117 | 1426.241 | 4275.68164 | 1426.2345  | 3 | 22 | 16.8892 | 212.16 |
| 26 | 19.01 | 21.04 | 68.3 PPP1R2_FlexIII | 99.0 DLHDDDEEEMLETADGESMNTTEESNQGSTPSDQQQNK | Deamidated(N) @ 21; Label: 13C(6)15N(2)(K) @ 38                                                          |                                  | 0.0420294   | 4276.70654 | 1426.576 | 4276.66553 | 1426.5625  | 3 | 27 | 26.7084 | 212.16 |
| 26 | 19.01 | 21.04 | 68.3 PPP1R2_FlexIII | 99.0 DLHDDDEEEMLETADGESMNTTEESNQGSTPSDQQQNK | Label: 13C(6)15N(2)(K) @ 38                                                                              |                                  | 0.0361694   | 4275.71631 | 1426.246 | 4275.68164 | 1426.2345  | 3 | 22 | 26.7314 | 212.16 |
| 26 | 19.01 | 21.04 | 68.3 PPP1R2_FlexIII | 99.0 DLHDDDEEEMLETADGESMNTTEESNQGSTPSDQQQNK | Deamidated(N) @ 21; Label: 13C(6)15N(2)(K) @ 38                                                          |                                  | 0.0409056   | 4276.70654 | 1070.184 | 4276.66553 | 1070.17371 | 4 | 17 | 16.7212 | 212.16 |
| 26 | 19.01 | 21.04 | 68.3 PPP1R2_FlexIII | 99.0 IQEOESSGEEDSLSPEER                     | Deamidated(Q) @ 4; Label: 13C(6)15N(4)(R) @ 19                                                           |                                  | 0.0323014   | 2173.93335 | 1087.974 | 2173.90112 | 1087.95776 | 2 | 17 | 15.1101 | 212.16 |
| 26 | 19.01 | 21.04 | 68.3 PPP1R2_FlexIII | 99.0 IQEOESSGEEDSLSPEEREK                   | Deamidated(Q) @ 4; Label: 13C(6)15N(4)(R) @ 19; Label: 13C(6)15N(2)(K) @ 21                              | missed R-E @ 19                  | 0.0211918   | 2439.07398 |          |            |            |   |    |         |        |

|    |       |       |                     |                                   |                                                                       |               |               |               |               |               |               |               |               |               |
|----|-------|-------|---------------------|-----------------------------------|-----------------------------------------------------------------------|---------------|---------------|---------------|---------------|---------------|---------------|---------------|---------------|---------------|
| 26 | 19.01 | 21.04 | 68.3 PPP1R2_FlexiII | 99.0 TSTTSSM/ASAEQPR              | Oxidation(M)@7; Label:13C(6)15N(4)(R)@15                              | 0.00337432    | 1577.72644    | 789.8705      | 1577.72302    | 789.868835    | 2             | 15            | 14.0693       | 212.16        |
| 26 | 19.01 | 21.04 | 68.3 PPP1R2_FlexiII | 99.0 TSTTSSM/ASAEQPR              | Oxidation(M)@7; Label:13C(6)15N(4)(R)@15                              | 0.00422881    | 1577.7273     | 789.8709      | 1577.72302    | 789.868835    | 2             | 15            | 14.1345       | 212.16        |
| 26 | 19.01 | 21.04 | 68.3 PPP1R2_FlexiII | 99.0 TSTTSSM/ASAEQPR              | Label:13C(6)15N(4)(R)@15                                              | 0.00244081    | 1561.73071    | 781.8726      | 1561.72815    | 781.871338    | 2             | 15            | 15.3744       | 212.16        |
| 26 | 19.01 | 21.04 | 68.3 PPP1R2_FlexiII | 99.0 TSTTSSM/ASAEQPR              | Label:13C(6)15N(4)(R)@15                                              | 0.00463809    | 1561.73291    | 781.8737      | 1561.72815    | 781.871338    | 2             | 15            | 15.9031       | 212.16        |
| 26 | 19.01 | 21.04 | 68.3 PPP1R2_FlexiII | 99.0 TSTTSSM/ASAEQPR              | Label:13C(6)15N(4)(R)@15                                              | 0.00060974    | 1561.72864    | 781.8716      | 1561.72815    | 781.871338    | 2             | 13            | 26.5833       | 212.16        |
| 26 | 19.01 | 21.04 | 68.3 PPP1R2_FlexiII | 99.0 TSTTSSM/ASAEQPR              | Label:13C(6)15N(4)(R)@15                                              | 0.00280702    | 1561.73084    | 781.8727      | 1561.72815    | 781.871338    | 2             | 14            | 15.4013       | 212.16        |
| 26 | 19.01 | 21.04 | 68.3 PPP1R2_FlexiII | 99.0 TSTTSSM/ASAEQPR              | Label:13C(6)15N(4)(R)@15                                              | 0.00280702    | 1561.73084    | 781.8727      | 1561.72815    | 781.871338    | 2             | 14            | 15.4087       | 212.16        |
| 26 | 19.01 | 21.04 | 68.3 PPP1R2_FlexiII | 99.0 TSTTSSM/ASAEQPR              | Label:13C(6)15N(4)(R)@15                                              | -0.00341861   | 1561.72473    | 781.8696      | 1561.72815    | 781.871338    | 2             | 13            | 26.5783       | 212.16        |
| 26 | 19.01 | 21.04 | 68.3 PPP1R2_FlexiII | 99.0 WDEMNIATYHPADKDYGLMK         | Label:13C(6)15N(2)(K)@15; Label:13C(6)15N(2)(K)@21                    | 0.00368685    | 2526.19336    | 843.0717      | 2526.18945    | 843.070435    | 3             | 23            | 18.2932       | 212.16        |
| 26 | 19.01 | 21.04 | 68.3 PPP1R2_FlexiII | 99.0 WDEMNIATYHPADKDYGLMK         | Label:13C(6)15N(2)(K)@15; Label:13C(6)15N(2)(K)@21                    | 0.00658074    | 2526.19531    | 1264.105      | 2526.18945    | 1264.10193    | 2             | 29            | 18.3669       | 212.16        |
| 26 | 19.01 | 21.04 | 68.3 PPP1R2_FlexiII | 99.0 WDEMNIATYHPADKDYGLMK         | Label:13C(6)15N(2)(K)@15; Label:13C(6)15N(2)(K)@21                    | 0.00515171    | 2526.19434    | 843.0721      | 2526.18945    | 843.070435    | 3             | 17            | 18.2452       | 212.16        |
| 26 | 19.01 | 21.04 | 68.3 PPP1R2_FlexiII | 99.0 WDEMNIATYHPADKDYGLMK         | Deamidated(N)@5; Label:13C(6)15N(2)(K)@15; Label:13C(6)15N(2)(K)@21   | 0.0425924     | 2527.21533    | 1264.615      | 2527.17334    | 1264.59399    | 2             | 17            | 18.3287       | 212.16        |
| 26 | 19.01 | 21.04 | 68.3 PPP1R2_FlexiII | 99.0 WDEMNIATYHPADKDYGLMK         | Label:13C(6)15N(2)(K)@15; Label:13C(6)15N(2)(K)@21                    | missed K-D@15 | missed K-D@15 | missed K-D@15 | missed K-D@15 | missed K-D@15 | missed K-D@15 | missed K-D@15 | missed K-D@15 | missed K-D@15 |
| 26 | 19.01 | 21.04 | 68.3 PPP1R2_FlexiII | 99.0 WDEMNIATYHPADKDYGLMK         | Label:13C(6)15N(2)(K)@15; Label:13C(6)15N(2)(K)@21                    | 0.00148957    | 2526.19092    | 843.0709      | 2526.18945    | 843.070435    | 3             | 15            | 18.415        | 212.16        |
| 26 | 19.01 | 21.04 | 68.3 PPP1R2_FlexiII | 99.0 WDEMNIATYHPADKDYGLMK         | Label:13C(6)15N(2)(K)@15; Label:13C(6)15N(2)(K)@21                    | 0.00148957    | 2526.17285    | 632.5505      | 2526.18945    | 632.554627    | 4             | 14            | 26.6546       | 212.16        |
| 26 | 19.01 | 21.04 | 68.3 PPP1R2_FlexiII | 99.0 YPTFLYK                      | Label:13C(6)15N(2)(K)@7                                               | -0.00061447   | 938.498657    | 470.2566      | 938.499329    | 470.256928    | 2             | 9             | 17.7815       | 212.16        |
| 28 | 15.45 | 17.52 | 61.8 GEMIN6_FlexiII | 99.0 EKLMLFTSGDCK                 | Label:13C(6)15N(2)(K)@2; Propionamide(C)@12; Label:13C(6)15N(2)(K)@13 | missed K-L@2  | missed K-L@2  | missed K-L@2  | missed K-L@2  | missed K-L@2  | missed K-L@2  | missed K-L@2  | missed K-L@2  | missed K-L@2  |
| 28 | 15.45 | 17.52 | 61.8 GEMIN6_FlexiII | 99.0 GPLEWQDYIYK                  | Label:13C(6)15N(2)(K)@11                                              | -0.00152458   | 1594.78027    | 532.6007      | 1594.78186    | 532.601196    | 3             | 16            | 16.4791       | 223.55        |
| 28 | 15.45 | 17.52 | 61.8 GEMIN6_FlexiII | 99.0 GPLEWQDYIYK                  | Label:13C(6)15N(2)(K)@1; Label:13C(6)15N(2)(K)@12                     | 0.00245116    | 1554.80786    | 778.4112      | 1554.8053     | 778.409912    | 2             | 20            | 18.0229       | 223.55        |
| 28 | 15.45 | 17.52 | 61.8 GEMIN6_FlexiII | 99.0 LMHLFTSGDCK                  | Propionamide(C)@10; Label:13C(6)15N(2)(K)@11                          | 0.00119824    | 1329.63123    | 665.8229      | 1329.63013    | 665.822327    | 2             | 17            | 16.7195       | 223.55        |
| 28 | 15.45 | 17.52 | 61.8 GEMIN6_FlexiII | 99.0 NHIPTEQGDAPR                 | Label:13C(6)15N(4)(R)@13                                              | 0.00095749    | 1456.73084    | 729.3727      | 1456.72986    | 729.372192    | 2             | 17            | 14.6314       | 223.55        |
| 28 | 15.45 | 17.52 | 61.8 GEMIN6_FlexiII | 99.0 TLCAVGVLTIIDPPYDENCSSSNEILSR | Propionamide(C)@3; Deamidated(N)@18; Propionamide(C)@19               | 0.00767485    | 3248.56738    | 1083.863      | 3248.55811    | 1083.85999    | 3             | 20            | 19.5715       | 223.55        |
| 28 | 15.45 | 17.52 | 61.8 GEMIN6_FlexiII | 99.0 EKLMLFTSGDCK                 | Label:13C(6)15N(2)(K)@2; Propionamide(C)@12; Label:13C(6)15N(2)(K)@13 | -0.00152458   | 1594.78027    | 532.6007      | 1594.78186    | 532.601196    | 3             | 14            | 16.4841       | 223.55        |
| 28 | 15.45 | 17.52 | 61.8 GEMIN6_FlexiII | 99.0 EKLMLFTSGDCK                 | Label:13C(6)15N(2)(K)@2; Propionamide(C)@12; Label:13C(6)15N(2)(K)@13 | -0.00152458   | 1594.78027    | 532.6007      | 1594.78186    | 532.601196    | 3             | 13            | 16.5556       | 223.55        |
| 28 | 15.45 | 17.52 | 61.8 GEMIN6_FlexiII | 99.0 GPLEWQDYIYK                  | Label:13C(6)15N(2)(K)@11                                              | -0.00049519   | 1418.69568    | 710.3551      | 1418.69617    | 710.355347    | 2             | 14            | 18.8071       | 223.55        |
| 28 | 15.45 | 17.52 | 61.8 GEMIN6_FlexiII | 99.0 GPLEWQDYIYK                  | Label:13C(6)15N(2)(K)@1; Label:13C(6)15N(2)(K)@12                     | 0.00245116    | 1554.80786    | 778.4112      | 1554.8053     | 778.409912    | 2             | 20            | 18.0253       | 223.55        |
| 28 | 15.45 | 17.52 | 61.8 GEMIN6_FlexiII | 99.0 GPLEWQDYIYK                  | Label:13C(6)15N(2)(K)@1; Label:13C(6)15N(2)(K)@12                     | 0.00245116    | 1554.80786    | 778.4112      | 1554.8053     | 778.409912    | 2             | 19            | 18.0477       | 223.55        |
| 28 | 15.45 | 17.52 | 61.8 GEMIN6_FlexiII | 99.0 GPLEWQDYIYK                  | Label:13C(6)15N(2)(K)@1; Label:13C(6)15N(2)(K)@12                     | -0.00153207   | 1554.80383    | 519.2752      | 1554.8053     | 519.275696    | 3             | 14            | 18.0377       | 223.55        |
| 28 | 15.45 | 17.52 | 61.8 GEMIN6_FlexiII | 99.0 GPLEWQDYIYK                  | Label:13C(6)15N(2)(K)@1; Label:13C(6)15N(2)(K)@12                     | -0.00116586   | 1554.8042     | 519.2753      | 1554.8053     | 519.275696    | 3             | 14            | 18.0881       | 223.55        |
| 28 | 15.45 | 17.52 | 61.8 GEMIN6_FlexiII | 99.0 GPLEWQDYIYK                  | Label:13C(6)15N(2)(K)@1; Label:13C(6)15N(2)(K)@12                     | 0.00049803    | 1554.80591    | 778.4102      | 1554.8053     | 778.409912    | 2             | 14            | 18.0958       | 223.55        |
| 28 | 15.45 | 17.52 | 61.8 GEMIN6_FlexiII | 99.0 GPLEWQDYIYK                  | Label:13C(6)15N(2)(K)@1; Label:13C(6)15N(2)(K)@12                     | -6.72E-05     | 1554.8053     | 519.2757      | 1554.8053     | 519.275696    | 3             | 13            | 26.5913       | 223.55        |
| 28 | 15.45 | 17.52 | 61.8 GEMIN6_FlexiII | 99.0 GPLEWQDYIYK                  | Label:13C(6)15N(2)(K)@1; Label:13C(6)15N(2)(K)@12                     | 0.012384      | 1554.81751    | 519.2798      | 1554.8053     | 519.275696    | 3             | 13            | 17.9956       | 223.55        |
| 28 | 15.45 | 17.52 | 61.8 GEMIN6_FlexiII | 99.0 LMHLFTSGDCK                  | Propionamide(C)@10; Label:13C(6)15N(2)(K)@11                          | 0.00119824    | 1329.63123    | 665.8229      | 1329.63013    | 665.822327    | 2             | 16            | 16.7243       | 223.55        |
| 28 | 15.45 | 17.52 | 61.8 GEMIN6_FlexiII | 99.0 LMHLFTSGDCK                  | Propionamide(C)@10; Label:13C(6)15N(2)(K)@11                          | 0.00119824    | 1329.63123    | 665.8229      | 1329.63013    | 665.822327    | 2             | 15            | 16.7369       | 223.55        |
| 28 | 15.45 | 17.52 | 61.8 GEMIN6_FlexiII | 99.0 LMHLFTSGDCK                  | Propionamide(C)@10; Label:13C(6)15N(2)(K)@11                          | 0.00205274    | 1329.63232    | 665.8234      | 1329.63013    | 665.822327    | 2             | 14            | 26.5711       | 223.55        |
| 28 | 15.45 | 17.52 | 61.8 GEMIN6_FlexiII | 99.0 LMHLFTSGDCK                  | Propionamide(C)@10; Label:13C(6)15N(2)(K)@11                          | 0.00058789    | 1329.63062    | 665.8226      | 1329.63013    | 665.822327    | 2             | 14            | 26.5862       | 223.55        |
| 28 | 15.45 | 17.52 | 61.8 GEMIN6_FlexiII | 99.0 LMHLFTSGDCK                  | Propionamide(C)@10; Label:13C(6)15N(2)(K)@11                          | -0.00196102   | 1329.62805    | 444.2166      | 1329.63013    | 444.217316    | 3             | 13            | 16.6892       | 223.55        |
| 28 | 15.45 | 17.52 | 61.8 GEMIN6_FlexiII | 99.0 LMHLFTSGDCK                  | Propionamide(C)@10; Label:13C(6)15N(2)(K)@11                          | -0.00196102   | 1329.62805    | 444.2166      | 1329.63013    | 444.217316    | 3             | 13            | 16.7044       | 223.55        |
| 28 | 15.45 | 17.52 | 61.8 GEMIN6_FlexiII | 99.0 LMHLFTSGDCK                  | Propionamide(C)@10; Label:13C(6)15N(2)(K)@11                          | -0.00168636   | 1329.6283     | 444.2167      | 1329.63013    | 444.217316    | 3             | 13            | 16.7516       | 223.55        |
| 28 | 15.45 | 17.52 | 61.8 GEMIN6_FlexiII | 99.0 LMHLFTSGDCK                  | Propionamide(C)@10; Label:13C(6)15N(2)(K)@11                          | 0.00046582    | 1329.63062    | 665.8226      | 1329.63013    | 665.822327    | 2             | 13            | 16.7617       | 223.55        |
| 28 | 15.45 | 17.52 | 61.8 GEMIN6_FlexiII | 99.0 LMHLFTSGDCK                  | Propionamide(C)@10; Label:13C(6)15N(2)(K)@11                          | 0.00058789    | 1329.63062    | 665.8226      | 1329.63013    | 665.822327    | 2             | 13            | 16.827        | 223.55        |
| 28 | 15.45 | 17.52 | 61.8 GEMIN6_FlexiII | 99.0 LMHLFTSGDCK                  | Propionamide(C)@10                                                    | 0.00119883    | 1321.61707    | 661.8158      | 1321.61585    | 661.815186    | 2             | 13            | 16.8875       | 223.55        |
| 28 | 15.45 | 17.52 | 61.8 GEMIN6_FlexiII | 99.0 LMHLFTSGDCK                  | Propionamide(C)@10; Label:13C(6)15N(2)(K)@11                          | -0.00104548   | 1329.62878    | 444.2169      | 1329.63013    | 444.217316    | 3             | 13            | 26.5609       | 223.55        |
| 28 | 15.45 | 17.52 | 61.8 GEMIN6_FlexiII | 99.0 LMHLFTSGDCK                  | Propionamide(C)@10                                                    | -0.00168663   | 1321.61401    | 441.5453      | 1321.61585    | 441.545898    | 3             | 12            | 16.7865       | 223.55        |
| 28 | 15.45 | 17.52 | 61.8 GEMIN6_FlexiII | 99.0 LMHLFTSGDCK                  | Propionamide(C)@10; Label:13C(6)15N(2)(K)@11                          | -0.00104548   | 1329.62878    | 444.2169      | 1329.63013    | 444.217316    | 3             | 12            | 26.5736       | 223.55        |
| 28 | 15.45 | 17.52 | 61.8 GEMIN6_FlexiII | 99.0 LMHLFTSGDCK                  | Propionamide(C)@10; Label:13C(6)15N(2)(K)@11                          | -0.00132014   | 1329.62878    | 444.2169      | 1329.63013    | 444.217316    | 3             | 12            | 16.7218       | 223.55        |
| 28 | 15.45 | 17.52 | 61.8 GEMIN6_FlexiII | 99.0 LMHLFTSGDCK                  | Propionamide(C)@10; Label:13C(6)15N(2)(K)@11                          | -0.00104548   | 1329.62878    | 444.2169      | 1329.63013    | 444.217316    | 3             | 12            | 26.5559       | 223.55        |
| 28 | 15.45 | 17.52 | 61.8 GEMIN6_FlexiII | 99.0 NHIPITEQGDAPR                | Label:13C(6)15N(4)(R)@13                                              | -0.00153038   | 1456.72839    | 486.5834      | 1456.72986    | 486.583893    | 3             | 16            | 14.6242       | 223.55        |
| 28 | 15.45 | 17.52 | 61.8 GEMIN6_FlexiII | 99.0 NHIPITEQGDAPR                | Label:13C(6)15N(4)(R)@13                                              | -0.00075618   | 1446.7207     | 483.2475      | 1446.72156    | 483.247803    | 3             | 16            | 14.6943       | 223.55        |
| 28 | 15.45 | 17.52 | 61.8 GEMIN6_FlexiII | 99.0 NHIPITEQGDAPR                | Label:13C(6)15N(4)(R)@13                                              | -0.00022145   | 1446.72131    | 724.3679      | 1446.72156    | 724.368042    | 2             | 16            | 14.772        | 223.55        |
| 28 | 15.45 | 17.52 | 61.8 GEMIN6_FlexiII | 99.0 NHIPITEQGDAPR                | Label:13C(6)15N(4)(R)@13                                              | 0.00095749    | 1456.73084    | 729.3727      | 1456.72986    | 729.372192    | 2             | 15            | 14.6339       | 223.55        |
| 28 | 15.45 | 17.52 | 61.8 GEMIN6_FlexiII | 99.0 NHIPITEQGDAPR                | Label:13C(6)15N(4)(R)@13                                              | -0.00075618   | 1446.7207     | 483.2475      | 1446.72156    | 483.247803    | 3             | 15            | 14.712        | 223.55        |
| 28 | 15.45 | 17.52 | 61.8 GEMIN6_FlexiII | 99.0 NHIPITEQGDAPR                | Label:13C(6)15N(4)(R)@13                                              | 0.00112133    | 1446.72266    | 724.3686      | 1446.72156    | 724.368042    | 2             | 15            | 14.7217       | 223.55        |
| 28 | 15.45 | 17.52 | 61.8 GEMIN6_FlexiII | 99.0 NHIPITEQGDAPR                | Label:13C(6)15N(4)(R)@13                                              | -0.00125573   | 1456.72864    | 486.5835      | 1456.72986    | 486.583893    | 3             | 15            | 15.1703       | 223.55        |
| 28 | 15.45 | 17.52 | 61.8 GEMIN6_FlexiII | 99.0 NHIPITEQGDAPR                | Label:13C(6)15N(4)(R)@13                                              | 0.00186685    | 1456.73169    | 486.5845      | 1456.72986    | 486.583893    | 3             | 7             | 0.6335        | 223.55        |
| 28 | 15.45 | 17.52 | 61.8 GEMIN6_FlexiII | 99.0 NHIPITEQGDAPR                | Label:13C(6)15N(4)(R)@13                                              | -0.0104928    | 1456.71936    | 486.5804      | 1456.72986    | 486.583893    | 3             | 7             | 6.9901        | 223.55        |
| 28 | 15.45 | 17.52 | 61.8 GEMIN6_FlexiII | 99.0 NHIPITEQGDAPR                | Label:13C(6)15N(4)(R)@13                                              | -0.00153038   | 1456.72839    | 486.5834      | 1456.72986    | 486.583893    | 3             | 14            | 14.6265       | 223.55        |
| 28 | 15.45 | 17.52 | 61.8 GEMIN6_FlexiII | 99.0 NHIPITEQGDAPR                | Label:13C(6)15N(4)(R)@13                                              | -0.00153038   | 1456.72839    | 486.5834      | 1456.72986    | 486.583893    | 3             | 14            | 14.6363       | 223.55        |
| 28 | 15.45 | 17.52 | 61.8 GEMIN6_FlexiII | 99.0 NHIPITEQGDAPR                | Label:13C(6)15N(4)(R)@13                                              | -0.00125573   | 1456.72864    | 486.5835      | 1456.72986    | 486.583893    | 3             | 14            | 14.6539       | 223.55        |
| 28 | 15.45 | 17.52 | 61.8 GEMIN6_FlexiII | 99.0 NHIPITEQGDAPR                | Label:13C(6)15N(4)(R)@13                                              | -0.0126999    | 1456.71729    | 486.5797      | 1456.72986    | 486.583893    |               |               |               |               |

|    |       |       |                     |                                                |                                                                                            |             |            |          |            |            |   |    |         |        |
|----|-------|-------|---------------------|------------------------------------------------|--------------------------------------------------------------------------------------------|-------------|------------|----------|------------|------------|---|----|---------|--------|
| 28 | 15.45 | 17.52 | 61.8 GEMIN6_FlexIII | 99.0 TLCVAGVLTIDPPYDPENCSSSNEILSR              | Propionamide(C) @ 3; Propionamide(C) @ 19; Label: 13C(6)15N(4)(R) @ 29                     | -0.0165349  | 3257.56738 | 1086.863 | 3257.58228 | 1086.86804 | 3 | 24 | 19.4471 | 223.55 |
| 28 | 15.45 | 17.52 | 61.8 GEMIN6_FlexIII | 99.0 TLCVAGVLTIDPPYDPENCSSSNEILSR              | Propionamide(C) @ 3; Propionamide(C) @ 19; Label: 13C(6)15N(4)(R) @ 29                     | -0.00921068 | 3257.57324 | 1086.865 | 3257.58228 | 1086.86804 | 3 | 20 | 19.503  | 223.55 |
| 28 | 15.45 | 17.52 | 61.8 GEMIN6_FlexIII | 99.0 TLCVAGVLTIDPPYDPENCSSSNEILSR              | Propionamide(C) @ 3; Deamidated(N) @ 18; Propionamide(C) @ 19; Label: 13C(6)15N(4)(R) @ 29 | 0.0193519   | 3258.58716 | 1087.203 | 3258.56641 | 1087.19605 | 3 | 20 | 19.924  | 223.55 |
| 28 | 15.45 | 17.52 | 61.8 GEMIN6_FlexIII | 99.0 TLCVAGVLTIDPPYDPENCSSSNEILSR              | Propionamide(C) @ 3; Propionamide(C) @ 19; Label: 13C(6)15N(4)(R) @ 29                     | -0.0165349  | 3257.56738 | 1086.863 | 3257.58228 | 1086.86804 | 3 | 22 | 19.957  | 223.55 |
| 28 | 15.45 | 17.52 | 61.8 GEMIN6_FlexIII | 99.0 TLCVAGVLTIDPPYDPENCSSSNEILSR              | Propionamide(C) @ 3; Propionamide(C) @ 19; Label: 13C(6)15N(4)(R) @ 29                     | -0.0106755  | 3257.57324 | 1086.865 | 3257.58228 | 1086.86804 | 3 | 19 | 20.286  | 223.55 |
| 28 | 15.45 | 17.52 | 61.8 GEMIN6_FlexIII | 99.0 TLCVAGVLTIDPPYDPENCSSSNEILSR              | Propionamide(C) @ 3; Propionamide(C) @ 19; Label: 13C(6)15N(4)(R) @ 29                     | 0.00946616  | 3257.59106 | 1086.871 | 3257.58228 | 1086.86804 | 3 | 20 | 26.4046 | 223.55 |
| 28 | 15.45 | 17.52 | 61.8 GEMIN6_FlexIII | 99.0 TLCVAGVLTIDPPYDPENCSSSNEILSR              | Propionamide(C) @ 3; Propionamide(C) @ 19; Label: 13C(6)15N(4)(R) @ 29                     | 0.00946616  | 3257.59106 | 1086.871 | 3257.58228 | 1086.86804 | 3 | 22 | 26.4971 | 223.55 |
| 28 | 15.45 | 17.52 | 61.8 GEMIN6_FlexIII | 99.0 TLCVAGVLTIDPPYDPENCSSSNEILSR              | Propionamide(C) @ 3; Propionamide(C) @ 19; Label: 13C(6)15N(4)(R) @ 29                     | 0.00946616  | 3257.59106 | 1086.871 | 3257.58228 | 1086.86804 | 3 | 22 | 26.4997 | 223.55 |
| 28 | 15.45 | 17.52 | 61.8 GEMIN6_FlexIII | 99.0 TLCVAGVLTIDPPYDPENCSSSNEILSR              | Propionamide(C) @ 3; Propionamide(C) @ 19; Label: 13C(6)15N(4)(R) @ 29                     | 0.00946616  | 3257.59106 | 1086.871 | 3257.58228 | 1086.86804 | 3 | 20 | 26.5023 | 223.55 |
| 28 | 15.45 | 17.52 | 61.8 GEMIN6_FlexIII | 99.0 TLCVAGVLTIDPPYDPENCSSSNEILSR              | Propionamide(C) @ 3; Propionamide(C) @ 19; Label: 13C(6)15N(4)(R) @ 29                     | 0.00946616  | 3257.59106 | 1086.871 | 3257.58228 | 1086.86804 | 3 | 22 | 26.5074 | 223.55 |
| 28 | 15.45 | 17.52 | 61.8 GEMIN6_FlexIII | 99.0 TLCVAGVLTIDPPYDPENCSSSNEILSR              | Propionamide(C) @ 3; Deamidated(N) @ 18; Propionamide(C) @ 19; Label: 13C(6)15N(4)(R) @ 29 | 0.0193519   | 3258.58716 | 1087.203 | 3258.56641 | 1087.19605 | 3 | 18 | 19.3965 | 223.55 |
| 28 | 15.45 | 17.52 | 61.8 GEMIN6_FlexIII | 99.0 TLCVAGVLTIDPPYDPENCSSSNEILSR              | Propionamide(C) @ 3; Deamidated(N) @ 18; Propionamide(C) @ 19; Label: 13C(6)15N(4)(R) @ 29 | 0.0193519   | 3258.58716 | 1087.203 | 3258.56641 | 1087.19605 | 3 | 18 | 20.4414 | 223.55 |
| 28 | 15.45 | 17.52 | 61.8 GEMIN6_FlexIII | 99.0 TLCVAGVLTIDPPYDPENCSSSNEILSR              | Propionamide(C) @ 3; Propionamide(C) @ 19; Label: 13C(6)15N(4)(R) @ 29                     | -0.00774583 | 3257.57324 | 1086.865 | 3257.58228 | 1086.86804 | 3 | 17 | 19.5436 | 223.55 |
| 28 | 15.45 | 17.52 | 61.8 GEMIN6_FlexIII | 99.0 TLCVAGVLTIDPPYDPENCSSSNEILSR              | Propionamide(C) @ 3; Propionamide(C) @ 19; Label: 13C(6)15N(4)(R) @ 29                     | 0.00946616  | 3257.59106 | 1086.871 | 3257.58228 | 1086.86804 | 3 | 17 | 26.5203 | 223.55 |
| 28 | 15.45 | 17.52 | 61.8 GEMIN6_FlexIII | 99.0 TLCVAGVLTIDPPYDPENCSSSNEILSR              | Propionamide(C) @ 3; Propionamide(C) @ 19; Label: 13C(6)15N(4)(R) @ 29                     | -0.0204268  | 3257.56104 | 1086.861 | 3257.58228 | 1086.86804 | 3 | 19 | 19.5368 | 223.55 |
| 28 | 15.45 | 17.52 | 61.8 GEMIN6_FlexIII | 99.0 TLCVAGVLTIDPPYDPENCSSSNEILSR              | Propionamide(C) @ 3; Propionamide(C) @ 19; Label: 13C(6)15N(4)(R) @ 29                     | -0.0165349  | 3257.56738 | 1086.863 | 3257.58228 | 1086.86804 | 3 | 12 | 20.978  | 223.55 |
| 28 | 15.45 | 17.52 | 61.8 GEMIN6_FlexIII | 99.0 TLCVAGVLTIDPPYDPENCSSSNEILSR              | Propionamide(C) @ 3; Deamidated(N) @ 18; Propionamide(C) @ 19; Label: 13C(6)15N(4)(R) @ 29 | 0.0154565   | 3258.5813  | 1087.201 | 3258.56641 | 1087.19605 | 3 | 9  | 26.5361 | 223.55 |
| 28 | 15.45 | 17.52 | 61.8 GEMIN6_FlexIII | 99.0 TLCVAGVLTIDPPYDPENCSSSNEILSR              | Propionamide(C) @ 3; Deamidated(N) @ 18; Propionamide(C) @ 19; Label: 13C(6)15N(4)(R) @ 29 | 0.0154565   | 3258.5813  | 1087.201 | 3258.56641 | 1087.19605 | 3 | 12 | 19.4835 | 223.55 |
| 28 | 15.45 | 17.52 | 61.8 GEMIN6_FlexIII | 99.0 TLCVAGVLTIDPPYDPENCSSSNEILSR              | Propionamide(C) @ 3; Deamidated(N) @ 18; Propionamide(C) @ 19; Label: 13C(6)15N(4)(R) @ 29 | 0.0193519   | 3258.58716 | 1087.203 | 3258.56641 | 1087.19605 | 3 | 10 | 27.0155 | 223.55 |
| 28 | 15.45 | 17.52 | 61.8 GEMIN6_FlexIII | 99.0 TLCVAGVLTIDPPYDPENCSSSNEILSR              | Propionamide(C) @ 3; Deamidated(N) @ 18; Propionamide(C) @ 19; Label: 13C(6)15N(4)(R) @ 29 | 0.0193519   | 3258.58716 | 1087.203 | 3258.56641 | 1087.19605 | 3 | 10 | 21.4797 | 223.55 |
| 28 | 15.45 | 17.52 | 61.8 GEMIN6_FlexIII | 99.0 YPTFLYK                                   | Label: 13C(6)15N(2)(K) @ 7                                                                 | -0.00061447 | 938.498657 | 470.2566 | 938.499329 | 470.256928 | 2 | 9  | 17.7815 | 223.55 |
| 31 | 12    | 14    | 71.3 CDKN2D_FlexIII | 99.0 ELVHPDALNR                                | Label: 13C(6)15N(4)(R) @ 11                                                                | 0.0012132   | 1162.61072 | 582.3126 | 1162.6095  | 582.312012 | 2 | 13 | 15.4747 | 140.15 |
| 31 | 12    | 14    | 71.3 CDKN2D_FlexIII | 99.0 GLTPLEALQOR                               | Gln->pyro-Glu @ N-term; Label: 13C(6)15N(4)(R) @ 21                                        | -0.00274868 | 1219.71362 | 610.8641 | 1219.71643 | 610.865479 | 2 | 12 | 18.9474 | 140.15 |
| 31 | 12    | 14    | 71.3 CDKN2D_FlexIII | 99.0 QGASPNVQDTSQSPVHDAAR                      | Label: 13C(6)15N(2)(K) @ 19                                                                | -0.00425191 | 2086.94946 | 1044.482 | 2086.95435 | 1044.4845  | 2 | 26 | 15.018  | 140.15 |
| 31 | 12    | 14    | 71.3 CDKN2D_FlexIII | 99.0 TALQVMFMFGSTIAIALELLK                     |                                                                                            | -0.009303   | 2044.1095  | 1023.062 | 2044.11926 | 1023.0669  | 2 | 21 | 20.7148 | 140.15 |
| 31 | 12    | 14    | 71.3 CDKN2D_FlexIII | 99.0 TGFLDTLK                                  |                                                                                            | -0.00148937 | 893.484497 | 447.7495 | 893.48584  | 447.750183 | 2 | 10 | 18.0113 | 140.15 |
| 31 | 12    | 14    | 71.3 CDKN2D_FlexIII | 99.0 VLVEHGADVNVPGTGALPHLVAQEGHTAVVSFLAAESDLHR | Label: 13C(6)15N(4)(R) @ 43                                                                | -0.0293967  | 4450.2627  | 1113.573 | 4450.29102 | 1113.57996 | 4 | 19 | 20.0164 | 140.15 |
| 31 | 12    | 14    | 71.3 CDKN2D_FlexIII | 99.0 ELVHPDALNR                                | Label: 13C(6)15N(4)(R) @ 10                                                                | 0.00068685  | 1172.61853 | 587.3165 | 1172.6178  | 587.316162 | 2 | 13 | 15.3429 | 140.15 |
| 31 | 12    | 14    | 71.3 CDKN2D_FlexIII | 99.0 ELVHPDALNR                                | Label: 13C(6)15N(4)(R) @ 10                                                                | 0.00044271  | 1172.61804 | 587.3163 | 1172.6178  | 587.316162 | 2 | 13 | 15.35   | 140.15 |
| 31 | 12    | 14    | 71.3 CDKN2D_FlexIII | 99.0 ELVHPDALNR                                | Label: 13C(6)15N(4)(R) @ 10                                                                | 0.00044271  | 1172.61804 | 587.3163 | 1172.6178  | 587.316162 | 2 | 12 | 15.5018 | 140.15 |
| 31 | 12    | 14    | 71.3 CDKN2D_FlexIII | 99.0 ELVHPDALNR                                | Label: 13C(6)15N(4)(R) @ 10                                                                | 0.00044271  | 1172.61804 | 587.3163 | 1172.6178  | 587.316162 | 2 | 11 | 15.3725 | 140.15 |
| 31 | 12    | 14    | 71.3 CDKN2D_FlexIII | 99.0 ELVHPDALNR                                | Label: 13C(6)15N(4)(R) @ 10                                                                | 7.65E-05    | 1172.61792 | 587.3162 | 1172.6178  | 587.316162 | 2 | 11 | 15.4321 | 140.15 |
| 31 | 12    | 14    | 71.3 CDKN2D_FlexIII | 99.0 ELVHPDALNR                                | Glu->pyro-Glu @ N-term; Label: 13C(6)15N(4)(R) @ 10                                        | -0.00332943 | 1154.60376 | 385.8752 | 1154.60718 | 385.876343 | 3 | 10 | 15.412  | 140.15 |
| 31 | 12    | 14    | 71.3 CDKN2D_FlexIII | 99.0 ELVHPDALNR                                | Glu->pyro-Glu @ N-term; Label: 13C(6)15N(4)(R) @ 10                                        | -0.00305477 | 1154.60413 | 385.8753 | 1154.60718 | 385.876343 | 3 | 10 | 15.38   | 140.15 |
| 31 | 12    | 14    | 71.3 CDKN2D_FlexIII | 99.0 GLTPLEALQOR                               | Label: 13C(6)15N(4)(R) @ 11                                                                | -0.00274868 | 1219.71362 | 610.8641 | 1219.71643 | 610.865479 | 2 | 12 | 18.9499 | 140.15 |
| 31 | 12    | 14    | 71.3 CDKN2D_FlexIII | 99.0 GLTPLEALQOR                               | Label: 13C(6)15N(4)(R) @ 11                                                                | -0.00274868 | 1219.71362 | 610.8641 | 1219.71643 | 610.865479 | 2 | 11 | 18.9675 | 140.15 |
| 31 | 12    | 14    | 71.3 CDKN2D_FlexIII | 99.0 GLTPLEALQOR                               |                                                                                            | -0.00258855 | 1209.70544 | 605.86   | 1209.70813 | 605.861328 | 2 | 11 | 19.0207 | 140.15 |
| 31 | 12    | 14    | 71.3 CDKN2D_FlexIII | 99.0 GLTPLEALQOR                               | Label: 13C(6)15N(4)(R) @ 11                                                                | -0.0108054  | 1219.70544 | 610.86   | 1219.71643 | 610.865479 | 2 | 11 | 19.4618 | 140.15 |
| 31 | 12    | 14    | 71.3 CDKN2D_FlexIII | 99.0 GLTPLEALQOR                               | Label: 13C(6)15N(4)(R) @ 11                                                                | -0.0108054  | 1219.70544 | 610.86   | 1219.71643 | 610.865479 | 2 | 9  | 26.462  | 140.15 |
| 31 | 12    | 14    | 71.3 CDKN2D_FlexIII | 99.0 QGASPNVQDTSQSPVHDAAR                      | Label: 13C(6)15N(4)(R) @ 21                                                                | -0.011408   | 2103.96924 | 526.9996 | 2103.98096 | 527.002502 | 4 | 17 | 13.7959 | 140.15 |
| 31 | 12    | 14    | 71.3 CDKN2D_FlexIII | 99.0 QGASPNVQDTSQSPVHDAAR                      | Deamidated(Q) @ 8; Label: 13C(6)15N(4)(R) @ 21                                             | 0.00458166  | 2104.96924 | 527.2496 | 2104.96484 | 527.248474 | 4 | 16 | 13.7984 | 140.15 |
| 31 | 12    | 14    | 71.3 CDKN2D_FlexIII | 99.0 QGASPNVQDTSQSPVHDAAR                      | Deamidated(N) @ 6; Label: 13C(6)15N(4)(R) @ 21                                             | 0.0248978   | 2104.9895  | 702.6705 | 2104.96484 | 702.662231 | 3 | 17 | 14.337  | 140.15 |
| 31 | 12    | 14    | 71.3 CDKN2D_FlexIII | 99.0 QGASPNVQDTSQSPVHDAAR                      | Label: 13C(6)15N(4)(R) @ 21                                                                | -0.0109894  | 2103.96997 | 702.3306 | 2103.98096 | 702.334229 | 3 | 18 | 14.3395 | 140.15 |
| 31 | 12    | 14    | 71.3 CDKN2D_FlexIII | 99.0 QGASPNVQDTSQSPVHDAAR                      | Label: 13C(6)15N(4)(R) @ 21                                                                | 0.00274359  | 2103.9834  | 702.3351 | 2103.98096 | 702.334229 | 3 | 18 | 14.3599 | 140.15 |
| 31 | 12    | 14    | 71.3 CDKN2D_FlexIII | 99.0 QGASPNVQDTSQSPVHDAAR                      | Gln->pyro-Glu @ N-term; Label: 13C(6)15N(4)(R) @ 21                                        | 0.00149409  | 2086.95581 | 696.6592 | 2086.95435 | 696.658752 | 3 | 17 | 14.3624 | 140.15 |
| 31 | 12    | 14    | 71.3 CDKN2D_FlexIII | 99.0 QGASPNVQDTSQSPVHDAAR                      | Gln->pyro-Glu @ N-term; Label: 13C(6)15N(4)(R) @ 21                                        | 0.00149409  | 2086.95581 | 696.6592 | 2086.95435 | 696.658752 | 3 | 17 | 14.365  | 140.15 |
| 31 | 12    | 14    | 71.3 CDKN2D_FlexIII | 99.0 QGASPNVQDTSQSPVHDAAR                      | Label: 13C(6)15N(4)(R) @ 21                                                                | 0.00274359  | 2103.9834  | 702.3351 | 2103.98096 | 702.334229 | 3 | 19 | 14.3777 | 140.15 |
| 31 | 12    | 14    | 71.3 CDKN2D_FlexIII | 99.0 QGASPNVQDTSQSPVHDAAR                      | Label: 13C(6)15N(4)(R) @ 21                                                                | 0.00419977  | 2103.98535 | 1053     | 2103.98096 | 1052.99768 | 2 | 27 | 14.4206 | 140.15 |
| 31 | 12    | 14    | 71.3 CDKN2D_FlexIII | 99.0 QGASPNVQDTSQSPVHDAAR                      | Label: 13C(6)15N(4)(R) @ 21                                                                | 0.00419977  | 2103.98535 | 1053     | 2103.98096 | 1052.99768 | 2 | 27 | 14.4231 | 140.15 |
| 31 | 12    | 14    | 71.3 CDKN2D_FlexIII | 99.0 QGASPNVQDTSQSPVHDAAR                      | Label: 13C(6)15N(4)(R) @ 21                                                                | 0.00419977  | 2103.98535 | 1053     | 2103.98096 | 1052.99768 | 2 | 25 | 14.4358 | 140.15 |
| 31 | 12    | 14    | 71.3 CDKN2D_FlexIII | 99.0 QGASPNVQDTSQSPVHDAAR                      |                                                                                            | 0.00717621  | 2093.97974 | 699.0005 | 2093.97266 | 698.998169 | 3 | 17 | 14.4484 | 140.15 |
| 31 | 12    | 14    | 71.3 CDKN2D_FlexIII | 99.0 QGASPNVQDTSQSPVHDAAR                      | Label: 13C(6)15N(4)(R) @ 21                                                                | 0.00241544  | 2093.97534 | 698.999  | 2093.97266 | 698.998169 | 3 | 17 | 14.456  | 140.15 |
| 31 | 12    | 14    | 71.3 CDKN2D_FlexIII | 99.0 QGASPNVQDTSQSPVHDAAR                      | Label: 13C(6)15N(4)(R) @ 21                                                                | 0.00127874  | 2103.98242 | 702.3347 | 2103.98096 | 702.334229 | 3 | 17 | 14.5287 | 140.15 |
| 31 | 12    | 14    | 71.3 CDKN2D_FlexIII | 99.0 QGASPNVQDTSQSPVHDAAR                      | Gln->pyro-Glu @ N-term; Label: 13C(6)15N(4)(R) @ 21                                        | 0.00533933  | 2086.95972 | 696.6605 | 2086.95435 | 696.658752 | 3 | 17 | 14.6962 | 140.15 |
| 31 | 12    | 14    | 71.3 CDKN2D_FlexIII | 99.0 QGASPNVQDTSQSPVHDAAR                      | Gln->pyro-Glu @ N-term; Label: 13C(6)15N(4)(R) @ 21                                        | 0.0018603   | 2086.95654 | 696.6594 | 2086.95435 | 696.658752 | 3 | 20 | 15.0525 | 140.15 |
| 31 | 12    | 14    | 71.3 CDKN2D_FlexIII | 99.0 QGASPNVQDTSQSPVHDAAR                      | Gln->pyro-Glu @ N-term; Label: 13C(6)15N(4)(R) @ 21                                        | 0.0018603   | 2086.95654 | 696.6594 | 2086.95435 | 696.658752 | 3 | 19 | 15.0573 | 140.15 |
| 31 | 12    | 14    | 71.3 CDKN2D_FlexIII | 99.0 QGASPNVQDTSQSPVHDAAR                      | Gln->pyro-Glu @ N-term; Label: 13C(6)15N(4)(R) @ 21                                        | 0.00429305  | 2086.95947 | 1044.487 | 2086.95435 | 1044.4845  | 2 | 18 | 15.1126 | 140.15 |
| 31 | 12    | 14    | 71.3 CDKN2D_FlexIII | 99.0 QGASPNVQDTSQSPVHDAAR                      | Gln->pyro-Glu @ N-term; Label: 13C(6)15N(4)(R) @ 21                                        | 0.0018603   | 2086.95654 | 696.6594 | 2086.95435 | 696.658752 | 3 | 20 | 15.2226 | 140.15 |
| 31 | 12    | 14    | 71.3 CDKN2D_FlexIII | 99.0 TALQVMFMFGSTIAIALELLK                     | Deamidated(Q) @ 4; Oxidation(M) @ 7; Label: 13C(6)15N(2)(K) @ 19                           | 0.0317529   | 2061.1294  | 1031.572 | 2061.09815 | 1031.5564  | 2 | 17 | 20.6258 | 140.15 |
| 31 | 12    | 14    | 71.3 CDKN2D_FlexIII | 99.0 TALQVMFMFGSTIAIALELLK                     | Oxidation(M) @ 7; Label: 13C(6)15N(2)(K) @ 19                                              | -0.00401226 | 2060.      |          |            |            |   |    |         |        |

|    |      |       |                     |                                                   |                                                                                                         |             |            |          |            |            |   |    |         |        |
|----|------|-------|---------------------|---------------------------------------------------|---------------------------------------------------------------------------------------------------------|-------------|------------|----------|------------|------------|---|----|---------|--------|
| 31 | 12   | 14    | 71.3 CDKN2D_FlexIII | 99.0 TALQVMMFGSTAJALELLK                          | Deamidated(Q) @ 4; Label: 13C(6)15N(2)(K) @ 19                                                          | 0.00776363  | 2045.11084 | 682.7109 | 2045.10327 | 682.708374 | 3 | 15 | 20.758  | 140.15 |
| 31 | 12   | 14    | 71.3 CDKN2D_FlexIII | 99.0 TALQVMMFGSTAJALELLK                          | Label: 13C(6)15N(2)(K) @ 19                                                                             | -0.00338202 | 2044.11585 | 682.3792 | 2044.11926 | 682.380371 | 3 | 14 | 20.7727 | 140.15 |
| 31 | 12   | 14    | 71.3 CDKN2D_FlexIII | 99.0 TGLFDTLK                                     | Label: 13C(6)15N(2)(K) @ 8                                                                              | -0.00185266 | 901.498291 | 451.7564 | 901.500061 | 451.757294 | 2 | 11 | 17.918  | 140.15 |
| 31 | 12   | 14    | 71.3 CDKN2D_FlexIII | 99.0 TGLFDTLK                                     |                                                                                                         | -0.00032969 | 893.485474 | 447.75   | 893.48584  | 447.750183 | 2 | 10 | 17.9485 | 140.15 |
| 31 | 12   | 14    | 71.3 CDKN2D_FlexIII | 99.0 TGLFDTLK                                     | Label: 13C(6)15N(2)(K) @ 8                                                                              | -0.00166956 | 901.498474 | 451.7565 | 901.500061 | 451.757294 | 2 | 10 | 17.8853 | 140.15 |
| 31 | 12   | 14    | 71.3 CDKN2D_FlexIII | 99.0 TGLFDTLK                                     | Label: 13C(6)15N(2)(K) @ 8                                                                              | -0.00166956 | 901.498474 | 451.7565 | 901.500061 | 451.757294 | 2 | 10 | 17.8878 | 140.15 |
| 31 | 12   | 14    | 71.3 CDKN2D_FlexIII | 99.0 TGLFDTLK                                     | Label: 13C(6)15N(2)(K) @ 8                                                                              | -0.00166956 | 901.498474 | 451.7565 | 901.500061 | 451.757294 | 2 | 9  | 17.9536 | 140.15 |
| 31 | 12   | 14    | 71.3 CDKN2D_FlexIII | 99.0 VLVEHGADVNVDPDGTGALPIHLAVQEGHTAVVSFLAAESDLHR | Deamidated(Q) @ 25; Label: 13C(6)15N(4)(R) @ 43                                                         | 0.0261612   | 4451.30127 | 742.8908 | 4451.2749  | 742.886414 | 6 | 20 | 19.8645 | 140.15 |
| 31 | 12   | 14    | 71.3 CDKN2D_FlexIII | 99.0 VLVEHGADVNVDPDGTGALPIHLAVQEGHTAVVSFLAAESDLHR | Label: 13C(6)15N(4)(R) @ 43                                                                             | -0.00765944 | 4450.2832  | 891.0639 | 4450.29102 | 891.06543  | 5 | 19 | 19.8696 | 140.15 |
| 31 | 12   | 14    | 71.3 CDKN2D_FlexIII | 99.0 VLVEHGADVNVDPDGTGALPIHLAVQEGHTAVVSFLAAESDLHR | Label: 13C(6)15N(4)(R) @ 43                                                                             | -0.00765944 | 4450.2832  | 891.0639 | 4450.29102 | 891.06543  | 5 | 18 | 19.8722 | 140.15 |
| 31 | 12   | 14    | 71.3 CDKN2D_FlexIII | 99.0 VLVEHGADVNVDPDGTGALPIHLAVQEGHTAVVSFLAAESDLHR | Deamidated(Q) @ 25; Label: 13C(6)15N(4)(R) @ 43                                                         | -0.00351069 | 4451.271   | 891.2615 | 4451.2749  | 891.262268 | 5 | 18 | 19.8899 | 140.15 |
| 31 | 12   | 14    | 71.3 CDKN2D_FlexIII | 99.0 VLVEHGADVNVDPDGTGALPIHLAVQEGHTAVVSFLAAESDLHR | Label: 13C(6)15N(4)(R) @ 43                                                                             | -0.0100922  | 4450.28125 | 742.7208 | 4450.29102 | 742.722412 | 6 | 20 | 19.9077 | 140.15 |
| 31 | 12   | 14    | 71.3 CDKN2D_FlexIII | 99.0 VLVEHGADVNVDPDGTGALPIHLAVQEGHTAVVSFLAAESDLHR | Label: 13C(6)15N(4)(R) @ 43                                                                             | -0.0195614  | 4450.271   | 891.0615 | 4450.29102 | 891.06543  | 5 | 18 | 19.9203 | 140.15 |
| 31 | 12   | 14    | 71.3 CDKN2D_FlexIII | 99.0 VLVEHGADVNVDPDGTGALPIHLAVQEGHTAVVSFLAAESDLHR | Label: 13C(6)15N(4)(R) @ 43                                                                             | -0.0055232  | 4450.28516 | 891.0643 | 4450.29102 | 891.06543  | 5 | 19 | 19.9808 | 140.15 |
| 31 | 12   | 14    | 71.3 CDKN2D_FlexIII | 99.0 VLVEHGADVNVDPDGTGALPIHLAVQEGHTAVVSFLAAESDLHR | Deamidated(Q) @ 25; Label: 13C(6)15N(4)(R) @ 43                                                         | -0.0134071  | 4451.2627  | 1113.823 | 4451.2749  | 1113.82605 | 4 | 20 | 20.0266 | 140.15 |
| 31 | 12   | 14    | 71.3 CDKN2D_FlexIII | 99.0 VLVEHGADVNVDPDGTGALPIHLAVQEGHTAVVSFLAAESDLHR | Deamidated(Q) @ 25; Label: 13C(6)15N(4)(R) @ 43                                                         | 0.0261612   | 4451.30127 | 742.8908 | 4451.2749  | 742.886414 | 6 | 20 | 20.4228 | 140.15 |
| 31 | 12   | 14    | 71.3 CDKN2D_FlexIII | 99.0 VLVEHGADVNVDPDGTGALPIHLAVQEGHTAVVSFLAAESDLHR | Deamidated(Q) @ 25; Label: 13C(6)15N(4)(R) @ 43                                                         | 0.0261612   | 4451.30127 | 742.8908 | 4451.2749  | 742.886414 | 6 | 18 | 26.6865 | 140.15 |
| 31 | 12   | 14    | 71.3 CDKN2D_FlexIII | 99.0 VLVEHGADVNVDPDGTGALPIHLAVQEGHTAVVSFLAAESDLHR | Deamidated(Q) @ 25; Label: 13C(6)15N(4)(R) @ 43                                                         | -0.00351069 | 4451.271   | 891.2615 | 4451.2749  | 891.262268 | 5 | 21 | 26.7321 | 140.15 |
| 31 | 12   | 14    | 71.3 CDKN2D_FlexIII | 99.0 VLVEHGADVNVDPDGTGALPIHLAVQEGHTAVVSFLAAESDLHR | Label: 13C(6)15N(4)(R) @ 43                                                                             | -0.0100922  | 4450.28125 | 742.7208 | 4450.29102 | 742.722412 | 6 | 19 | 26.7473 | 140.15 |
| 31 | 12   | 14    | 71.3 CDKN2D_FlexIII | 99.0 VLVEHGADVNVDPDGTGALPIHLAVQEGHTAVVSFLAAESDLHR | Label: 13C(6)15N(4)(R) @ 43                                                                             | 0.0304877   | 4450.3208  | 891.0715 | 4450.29102 | 891.06543  | 5 | 15 | 26.7755 | 140.15 |
| 31 | 12   | 14    | 71.3 CDKN2D_FlexIII | 99.0 YPTFLYK                                      | Label: 13C(6)15N(2)(K) @ 7                                                                              | -0.00061447 | 938.498657 | 470.2566 | 938.499329 | 470.256928 | 2 | 9  | 17.7815 | 140.15 |
| 44 | 7.38 | 9.59  | 65.8 CEBPG_FlexIII  | 99.0 DLFLAHAHLNADNVQSISTENTTADGDNAGGYPTFLYK       | Label: 13C(6)15N(2)(K) @ 38                                                                             | -0.00150154 | 4216.9707  | 1055.25  | 4216.9707  | 1055.24988 | 4 | 27 | 18.6962 | 79.94  |
| 44 | 7.38 | 9.59  | 65.8 CEBPG_FlexIII  | 99.0 VNQLKEENERLEAK                               | Label: 13C(6)15N(2)(K) @ 5; Label: 13C(6)15N(4)(R) @ 10; Label: 13C(6)15N(2)(K) @ 14                    | 0.0011561   | 1724.92786 | 863.4712 | 1724.92676 | 863.470642 | 2 | 20 | 14.4198 | 79.94  |
| 44 | 7.38 | 9.59  | 65.8 CEBPG_FlexIII  | 99.0 VNQLKEENER                                   | Label: 13C(6)15N(2)(K) @ 5; Label: 13C(6)15N(4)(R) @ 10                                                 | -0.00845737 | 1275.64551 | 638.83   | 1275.65381 | 638.834168 | 2 | 8  | 10.7869 | 79.94  |
| 44 | 7.38 | 9.59  | 65.8 CEBPG_FlexIII  | 99.0 ISOQNSTPGVNGISVIHTQAHASGLQOVQPLVPAGPGGGGK    | Deamidated(N) @ 11; Label: 13C(6)15N(2)(K) @ 41                                                         | 0.00485359  | 3995.07544 | 999.7761 | 3995.07056 | 999.774902 | 4 | 13 | 26.7598 | 79.94  |
| 44 | 7.38 | 9.59  | 65.8 CEBPG_FlexIII  | 99.0 DLFLAHAHLNADNVQSISTENTTADGDNAGGYPTFLYK       | Deamidated(N) @ 21; Label: 13C(6)15N(2)(K) @ 38                                                         | 0.0154591   | 4217.9707  | 1055.5   | 4217.95459 | 1055.49585 | 4 | 26 | 18.714  | 79.94  |
| 44 | 7.38 | 9.59  | 65.8 CEBPG_FlexIII  | 99.0 DLFLAHAHLNADNVQSISTENTTADGDNAGGYPTFLYK       | Label: 13C(6)15N(2)(K) @ 38                                                                             | -0.00052497 | 4216.9707  | 1055.25  | 4216.9707  | 1055.24988 | 4 | 27 | 18.7242 | 79.94  |
| 44 | 7.38 | 9.59  | 65.8 CEBPG_FlexIII  | 99.0 DLFLAHAHLNADNVQSISTENTTADGDNAGGYPTFLYK       | Deamidated(N) @ 21; Label: 13C(6)15N(2)(K) @ 38                                                         | 0.0225657   | 4217.97803 | 1407     | 4217.95459 | 1406.99207 | 3 | 32 | 18.7471 | 79.94  |
| 44 | 7.38 | 9.59  | 65.8 CEBPG_FlexIII  | 99.0 DLFLAHAHLNADNVQSISTENTTADGDNAGGYPTFLYK       | Label: 13C(6)15N(2)(K) @ 38                                                                             | 0.0167153   | 4216.98828 | 1406.67  | 4216.9707  | 1406.66406 | 3 | 36 | 18.7752 | 79.94  |
| 44 | 7.38 | 9.59  | 65.8 CEBPG_FlexIII  | 99.0 DLFLAHAHLNADNVQSISTENTTADGDNAGGYPTFLYK       | Deamidated(N) @ 21; Label: 13C(6)15N(2)(K) @ 38                                                         | 0.00822857  | 4217.96338 | 844.5999 | 4217.95459 | 844.598206 | 5 | 24 | 18.8414 | 79.94  |
| 44 | 7.38 | 9.59  | 65.8 CEBPG_FlexIII  | 99.0 DLFLAHAHLNADNVQSISTENTTADGDNAGGYPTFLYK       | Deamidated(N) @ 21; Label: 13C(6)15N(2)(K) @ 38                                                         | 0.0259636   | 4217.97852 | 1055.502 | 4217.95459 | 1055.49585 | 4 | 24 | 18.8006 | 79.94  |
| 44 | 7.38 | 9.59  | 65.8 CEBPG_FlexIII  | 99.0 DLFLAHAHLNADNVQSISTENTTADGDNAGGYPTFLYK       | Deamidated(N) @ 28; Label: 13C(6)15N(2)(K) @ 38                                                         | 0.0154591   | 4217.9707  | 1055.5   | 4217.95459 | 1055.49585 | 4 | 11 | 26.6986 | 79.94  |
| 44 | 7.38 | 9.59  | 65.8 CEBPG_FlexIII  | 99.0 ISOQNSTPGVNGISVIHTQAHASGLQOVQPLVPAGPGGGGK    | Label: 13C(6)15N(2)(K) @ 41                                                                             | -0.00844491 | 3994.07813 | 999.5268 | 3994.08643 | 999.52887  | 4 | 12 | 17.4429 | 79.94  |
| 44 | 7.38 | 9.59  | 65.8 CEBPG_FlexIII  | 99.0 ISOQNSTPGVNGISVIHTQAHASGLQOVQPLVPAGPGGGGK    | Label: 13C(6)15N(2)(K) @ 41                                                                             | -0.00844491 | 3994.07813 | 999.5268 | 3994.08643 | 999.52887  | 4 | 12 | 17.4656 | 79.94  |
| 44 | 7.38 | 9.59  | 65.8 CEBPG_FlexIII  | 99.0 ISOQNSTPGVNGISVIHTQAHASGLQOVQPLVPAGPGGGGK    | Label: 13C(6)15N(2)(K) @ 41                                                                             | 0.00376212  | 3994.09009 | 999.5298 | 3994.08643 | 999.52887  | 4 | 12 | 17.5646 | 79.94  |
| 44 | 7.38 | 9.59  | 65.8 CEBPG_FlexIII  | 99.0 VNQLKEENER                                   | Label: 13C(6)15N(2)(K) @ 5; Label: 13C(6)15N(4)(R) @ 10                                                 | -0.00088901 | 1275.65283 | 638.8337 | 1275.65381 | 638.834168 | 2 | 7  | 11.3036 | 79.94  |
| 44 | 7.38 | 9.59  | 65.8 CEBPG_FlexIII  | 99.0 VNQLKEENER                                   | Label: 13C(6)15N(2)(K) @ 5; Label: 13C(6)15N(4)(R) @ 10                                                 | -0.00030702 | 1275.65344 | 426.2251 | 1450.63269 | 484.551514 | 3 | 8  | 12.2145 | 79.94  |
| 44 | 7.38 | 9.59  | 65.8 CEBPG_FlexIII  | 99.0 VNQLKEENERLEAK                               | Label: 13C(6)15N(2)(K) @ 5; Label: 13C(6)15N(4)(R) @ 10; Label: 13C(6)15N(2)(K) @ 14                    | -0.00125263 | 1724.92542 | 575.9824 | 1724.92676 | 575.982849 | 3 | 11 | 14.3441 | 79.94  |
| 44 | 7.38 | 9.59  | 65.8 CEBPG_FlexIII  | 99.0 VNQLKEENERLEAK                               | Label: 13C(6)15N(2)(K) @ 5; Label: 13C(6)15N(4)(R) @ 10; Label: 13C(6)15N(2)(K) @ 14                    | 0.00125263  | 1724.92542 | 575.9824 | 1724.92676 | 575.982849 | 3 | 11 | 14.3492 | 79.94  |
| 44 | 7.38 | 9.59  | 65.8 CEBPG_FlexIII  | 99.0 VNQLKEENERLEAK                               | Deamidated(N) @ 2; Label: 13C(6)15N(2)(K) @ 5; Label: 13C(6)15N(4)(R) @ 10; Label: 13C(6)15N(2)(K) @ 14 | 0.0143325   | 1725.92505 | 863.9698 | 1725.91077 | 863.962647 | 2 | 11 | 14.4324 | 79.94  |
| 44 | 7.38 | 9.59  | 65.8 CEBPG_FlexIII  | 99.0 YPTFLYK                                      | Label: 13C(6)15N(2)(K) @ 7                                                                              | -0.00061447 | 938.498657 | 470.2566 | 938.499329 | 470.256928 | 2 | 9  | 17.7815 | 79.94  |
| 53 | 4.63 | 6.81  | 20.1 MYADM_FlexIII  | 99.0 SHAYYYCAWDR                                  | Propionamide(C) @ 7; Label: 13C(6)15N(4)(R) @ 11                                                        | 8.56E-05    | 1450.63269 | 484.5515 | 1450.63269 | 484.551514 | 3 | 15 | 16.5735 | 29.53  |
| 53 | 4.63 | 6.81  | 20.1 MYADM_FlexIII  | 99.0 TTTITTTTSSSGLGSPMIVGSPR                      | Label: 13C(6)15N(4)(R) @ 23                                                                             | -0.00430361 | 2261.14063 | 754.7208 | 2261.14478 | 754.722229 | 3 | 20 | 17.205  | 29.53  |
| 53 | 4.63 | 6.81  | 20.1 MYADM_FlexIII  | 99.0 SHAYYYCAWDR                                  | Propionamide(C) @ 7; Label: 13C(6)15N(4)(R) @ 11                                                        | 8.56E-05    | 1450.63269 | 484.5515 | 1450.63269 | 484.551514 | 3 | 14 | 16.5811 | 29.53  |
| 53 | 4.63 | 6.81  | 20.1 MYADM_FlexIII  | 99.0 SHAYYYCAWDR                                  | Propionamide(C) @ 7; Label: 13C(6)15N(4)(R) @ 11                                                        | 0.00233907  | 1450.63513 | 726.3248 | 1450.63269 | 726.323669 | 2 | 13 | 16.5786 | 29.53  |
| 53 | 4.63 | 6.81  | 20.1 MYADM_FlexIII  | 99.0 TTTITTTTSSSGLGSPMIVGSPR                      | Label: 13C(6)15N(4)(R) @ 23                                                                             | 0.00484687  | 2261.14941 | 1131.582 | 2261.14478 | 1131.57971 | 2 | 25 | 17.1998 | 29.53  |
| 53 | 4.63 | 6.81  | 20.1 MYADM_FlexIII  | 99.0 TTTITTTTSSSGLGSPMIVGSPR                      | Label: 13C(6)15N(4)(R) @ 23                                                                             | 0.00265442  | 2261.14746 | 754.7231 | 2261.14478 | 754.722229 | 3 | 22 | 17.2302 | 29.53  |
| 53 | 4.63 | 6.81  | 20.1 MYADM_FlexIII  | 99.0 TTTITTTTSSSGLGSPMIVGSPR                      | Label: 13C(6)15N(4)(R) @ 23                                                                             | 0.00265442  | 2261.14746 | 754.7231 | 2261.14478 | 754.722229 | 3 | 21 | 17.2353 | 29.53  |
| 53 | 4.63 | 6.81  | 20.1 MYADM_FlexIII  | 99.0 TTTITTTTSSSGLGSPMIVGSPR                      | Label: 13C(6)15N(4)(R) @ 23                                                                             | 0.0021051   | 2261.14697 | 754.7229 | 2261.14478 | 754.722229 | 3 | 22 | 17.2784 | 29.53  |
| 53 | 4.63 | 6.81  | 20.1 MYADM_FlexIII  | 99.0 TTTITTTTSSSGLGSPMIVGSPR                      | Label: 13C(6)15N(4)(R) @ 23                                                                             | 0.00924142  | 2261.15332 | 1131.584 | 2261.14478 | 1131.57971 | 2 | 15 | 26.497  | 29.53  |
| 53 | 4.63 | 6.81  | 20.1 MYADM_FlexIII  | 99.0 TTTITTTTSSSGLGSPMIVGSPR                      | Label: 13C(6)15N(4)(R) @ 23                                                                             | 0.00924142  | 2261.15332 | 1131.584 | 2261.14478 | 1131.57971 | 2 | 13 | 26.4791 | 29.53  |
| 53 | 4.63 | 6.81  | 20.1 MYADM_FlexIII  | 99.0 TTTITTTTSSSGLGSPMIVGSPR                      | Label: 13C(6)15N(4)(R) @ 23                                                                             | 0.00924142  | 2261.15332 | 1131.584 | 2261.14478 | 1131.57971 | 2 | 12 | 26.4919 | 29.53  |
| 53 | 4.63 | 6.81  | 20.1 MYADM_FlexIII  | 99.0 YPTFLYK                                      | Label: 13C(6)15N(2)(K) @ 7                                                                              | -0.00061447 | 938.498657 | 470.2566 | 938.499329 | 470.256928 | 2 | 9  | 17.7815 | 29.53  |
| 65 | 2    | 4     | 59.6 LIMS1_FlexIII  | 99.0 LAETLGRKYPTFLYK                              | Label: 13C(6)15N(4)(R) @ 7; Label: 13C(6)15N(2)(K) @ 8; Label: 13C(6)15N(2)(K) @ 15                     | -0.00498073 | 1825.02979 | 609.3505 | 1825.03479 | 609.352234 | 3 | 11 | 17.6833 | 4.68   |
| 65 | 2    | 4     | 59.6 LIMS1_FlexIII  | 99.0 YPTFLYK                                      | Label: 13C(6)15N(2)(K) @ 7                                                                              | -0.00061447 | 938.498657 | 470.2566 | 938.499329 | 470.256928 | 2 | 9  | 17.7815 | 4.68   |
| 93 | 0.45 | 15.81 | 67.3 CAMK2B_FlexIII | 99.0 AGAYDFPSPPEWDTVPEAK                          | Label: 13C(6)15N(2)(K) @ 19                                                                             | 0.0146768   | 2087.97144 | 1044.993 | 2087.95679 | 1044.9856  | 2 | 19 | 18.4195 | 20.90  |
| 93 | 0.45 | 15.81 | 67.3 CAMK2B_FlexIII | 99.0 AGAYDFPSPPEWDTVPEAK                          | Label: 13C(6)15N(2)(K) @ 19                                                                             | 0.00369042  | 2087.96143 | 1044.988 | 2087.95679 | 1044.9856  | 2 | 14 | 18.48   | 20.90  |
| 93 | 0.45 | 15.81 | 67.3 CAMK2B_FlexIII | 99.0 DLKPENLLASK                                  | Label: 13C(6)15N(2)(K) @ 3; Label: 13C(6)15N(2)(K) @ 12                                                 | 0.00152377  | 1355.80103 | 678.9078 | 1355.79956 | 678.907044 | 2 | 17 | 17.6742 | 20.90  |
| 93 | 0.45 | 15.81 | 67.3 CAMK2B_FlexIII | 99.0 DLKPENLLASK                                  | Label: 13C(6)15N(2)(K) @ 3; Label: 13C(6)15N(2)(K) @ 12                                                 | 0.00726111  | 1355.80664 | 678.9106 | 1355.79956 | 678.907044 | 2 | 16 | 17.6691 | 20.90  |
| 93 | 0.45 | 15.81 | 67.3 CAMK2B_FlexIII | 99.0 DLKPENLLASK                                  | Label: 13C(6)15N(2)(K) @ 3; Label: 13C(6)15N(2)(K) @ 12                                                 | 0.00115755  | 1355.      |          |            |            |   |    |         |        |

|    |        |        |                      |                                    |                                                                       |                    |             |            |          |            |            |   |    |         |        |
|----|--------|--------|----------------------|------------------------------------|-----------------------------------------------------------------------|--------------------|-------------|------------|----------|------------|------------|---|----|---------|--------|
| 93 | 0.45   | 15.81  | 67.3 CAMK2B_FlexIII  | 99.0 YPTFLYK                       | Label:13C(6)15N(2)(K)@7                                               | cleaved Q-Y@N-term | -0.00061447 | 938.498657 | 470.2566 | 938.499329 | 470.256928 | 2 | 9  | 17.7815 | 20.90  |
| 1  | 103.53 | 103.53 | 78.6 DNM1L_FlexIII   | 99.0 TLAVITK                       | Label:13C(6)15N(2)(K)@7                                               |                    | -0.00154831 | 752.487244 | 377.2509 | 752.48877  | 377.251648 | 2 | 10 | 15.8206 | 38.55  |
| 24 | 19.83  | 21.83  | 48.3 FOS_FlexIII     | 99.0 VEQLSPPEEEK                   | Label:13C(6)15N(2)(K)@11                                              |                    | 0.00060625  | 1323.62903 | 662.8218 | 1323.62854 | 662.821533 | 2 | 14 | 14.6803 | 136.39 |
| 12 | 41.66  | 43.83  | 57.8 CEACAM5_FlexIII | 99.0 LTIESTPPNVAEGK                | Label:13C(6)15N(2)(K)@14                                              |                    | 9.16E-05    | 1512.79163 | 757.4031 | 1512.7915  | 757.403015 | 2 | 14 | 17.9199 | 162.25 |
| 14 | 38.32  | 40.36  | 61.0 PPP3CA_FlexIII  | 99.0 AHEAQDAGYR                    | Label:13C(6)15N(4)(R)@10                                              |                    | 0.00126413  | 1126.50427 | 376.5087 | 1126.50305 | 376.508301 | 3 | 9  | 10.6436 | 139.34 |
| 13 | 39.31  | 41.31  | 63.5 CAMK2D_FlexIII  | 99.0 SNKPIHTILNPHVHLVGDDAACIAYIR   | Label:13C(6)15N(2)(K)@3; Propionamide(C)@23; Label:13C(6)15N(4)(R)@28 |                    | -0.00201392 | 3168.69653 | 793.1814 | 3168.69849 | 793.181885 | 4 | 12 | 26.73   | 95.69  |
| 14 | 38.32  | 40.36  | 61.0 PPP3CA_FlexIII  | 98.9 AHEAQDAGYR                    | Label:13C(6)15N(4)(R)@10                                              |                    | -0.00413751 | 1126.4989  | 376.5069 | 1126.50305 | 376.508301 | 3 | 10 | 9.1254  | 139.34 |
| 14 | 38.32  | 40.36  | 61.0 PPP3CA_FlexIII  | 98.9 DAMPSDANLNSINK                | Deamidated(N)@10; Label:13C(6)15N(2)(K)@14                            |                    | 0.00161132  | 1497.68762 | 749.8511 | 1497.68604 | 749.850342 | 2 | 14 | 16.0561 | 139.34 |
| 13 | 39.31  | 41.31  | 63.5 CAMK2D_FlexIII  | 98.9 STVASMHR                      | Label:13C(6)15N(4)(R)@9                                               |                    | -0.00013658 | 1028.47693 | 515.2457 | 1028.47705 | 515.24585  | 2 | 12 | 15.1264 | 95.69  |
| 93 | 0.45   | 15.81  | 67.3 CAMK2B_FlexIII  | 98.9 STVASMHR                      | Label:13C(6)15N(4)(R)@9                                               |                    | -0.00013658 | 1028.47693 | 515.2457 | 1028.47705 | 515.24585  | 2 | 12 | 15.1264 | 20.90  |
| 1  | 103.53 | 103.53 | 78.6 DNM1L_FlexIII   | 98.9 YPTFLYK                       | Label:13C(6)15N(2)(K)@7                                               | cleaved W-Y@N-term | 0.00032147  | 938.499695 | 470.2571 | 938.499329 | 470.256928 | 2 | 9  | 17.5983 | 38.55  |
| 2  | 66.08  | 68.08  | 40.2 RPS6KA1_FlexIII | 98.9 YPTFLYK                       | Label:13C(6)15N(2)(K)@7                                               | cleaved L-Y@N-term | 0.00032147  | 938.499695 | 470.2571 | 938.499329 | 470.256928 | 2 | 9  | 17.5983 | 114.74 |
| 3  | 60.89  | 62.89  | 59.3 BTRC_FlexIII    | 98.9 YPTFLYK                       | Label:13C(6)15N(2)(K)@7                                               |                    | 0.00032147  | 938.499695 | 470.2571 | 938.499329 | 470.256928 | 2 | 9  | 17.5983 | 41.90  |
| 4  | 58.58  | 60.58  | 70.0 NET1_FlexIII    | 98.9 YPTFLYK                       | Label:13C(6)15N(2)(K)@7                                               | cleaved V-Y@N-term | 0.00032147  | 938.499695 | 470.2571 | 938.499329 | 470.256928 | 2 | 9  | 17.5983 | 4.38   |
| 5  | 56.01  | 58.01  | 69.8 PDK1_FlexIII    | 98.9 YPTFLYK                       | Label:13C(6)15N(2)(K)@7                                               | cleaved A-Y@N-term | 0.00032147  | 938.499695 | 470.2571 | 938.499329 | 470.256928 | 2 | 9  | 17.5983 | 33.22  |
| 6  | 55.31  | 57.32  | 3.8 CDC27_FlexIII    | 98.9 YPTFLYK                       | Label:13C(6)15N(2)(K)@7                                               | cleaved F-Y@N-term | 0.00032147  | 938.499695 | 470.2571 | 938.499329 | 470.256928 | 2 | 9  | 17.5983 | 0.76   |
| 7  | 54.8   | 57     | 71.4 POLR3D_FlexIII  | 98.9 YPTFLYK                       | Label:13C(6)15N(2)(K)@7                                               |                    | 0.00032147  | 938.499695 | 470.2571 | 938.499329 | 470.256928 | 2 | 9  | 17.5983 | 77.94  |
| 8  | 43.77  | 47.77  | 39.1 ODF2_FlexIII    | 98.9 YPTFLYK                       | Label:13C(6)15N(2)(K)@7                                               | cleaved A-Y@N-term | 0.00032147  | 938.499695 | 470.2571 | 938.499329 | 470.256928 | 2 | 9  | 17.5983 | 9.70   |
| 9  | 43.4   | 45.4   | 53.4 FBXW2_FlexIII   | 98.9 YPTFLYK                       | Label:13C(6)15N(2)(K)@7                                               | cleaved G-Y@N-term | 0.00032147  | 938.499695 | 470.2571 | 938.499329 | 470.256928 | 2 | 9  | 17.5983 | 87.11  |
| 10 | 42.4   | 44.59  | 60.6 GPC4_FlexIII    | 98.9 YPTFLYK                       | Label:13C(6)15N(2)(K)@7                                               |                    | 0.00032147  | 938.499695 | 470.2571 | 938.499329 | 470.256928 | 2 | 9  | 17.5983 | 84.97  |
| 11 | 42     | 44     | 63.3 EFEMP1_FlexIII  | 98.9 YPTFLYK                       | Label:13C(6)15N(2)(K)@7                                               | cleaved F-Y@N-term | 0.00032147  | 938.499695 | 470.2571 | 938.499329 | 470.256928 | 2 | 9  | 17.5983 | 50.15  |
| 12 | 41.66  | 43.83  | 57.8 CEACAM5_FlexIII | 98.9 YPTFLYK                       | Label:13C(6)15N(2)(K)@7                                               | cleaved I-Y@N-term | 0.00032147  | 938.499695 | 470.2571 | 938.499329 | 470.256928 | 2 | 9  | 17.5983 | 162.25 |
| 13 | 39.31  | 41.31  | 63.5 CAMK2D_FlexIII  | 98.9 YPTFLYK                       | Label:13C(6)15N(2)(K)@7                                               |                    | 0.00032147  | 938.499695 | 470.2571 | 938.499329 | 470.256928 | 2 | 9  | 17.5983 | 95.69  |
| 14 | 38.32  | 40.36  | 61.0 PPP3CA_FlexIII  | 98.9 YPTFLYK                       | Label:13C(6)15N(2)(K)@7                                               | cleaved Q-Y@N-term | 0.00032147  | 938.499695 | 470.2571 | 938.499329 | 470.256928 | 2 | 9  | 17.5983 | 139.34 |
| 16 | 36.84  | 38.92  | 46.6 C3ORD37_FlexIII | 98.9 YPTFLYK                       | Label:13C(6)15N(2)(K)@7                                               | cleaved Q-Y@N-term | 0.00032147  | 938.499695 | 470.2571 | 938.499329 | 470.256928 | 2 | 9  | 17.5983 | 50.01  |
| 17 | 36     | 38     | 65.3 TOB1_FlexIII    | 98.9 YPTFLYK                       | Label:13C(6)15N(2)(K)@7                                               | cleaved N-Y@N-term | 0.00032147  | 938.499695 | 470.2571 | 938.499329 | 470.256928 | 2 | 9  | 17.5983 | 84.84  |
| 18 | 32.93  | 34.93  | 58.8 CSNK1E_FlexIII  | 98.9 YPTFLYK                       | Label:13C(6)15N(2)(K)@7                                               |                    | 0.00032147  | 938.499695 | 470.2571 | 938.499329 | 470.256928 | 2 | 9  | 17.5983 | 24.43  |
| 19 | 28     | 30     | 42.2 FKBP3_FlexIII   | 98.9 YPTFLYK                       | Label:13C(6)15N(2)(K)@7                                               | cleaved D-Y@N-term | 0.00032147  | 938.499695 | 470.2571 | 938.499329 | 470.256928 | 2 | 9  | 17.5983 | 106.31 |
| 24 | 19.83  | 21.83  | 48.3 FOS_FlexIII     | 98.9 SALQTEIANLLK                  | Label:13C(6)15N(2)(K)@12                                              |                    | -0.0057869  | 1307.74829 | 654.8814 | 1307.75403 | 654.884277 | 2 | 14 | 19.7631 | 136.39 |
| 24 | 19.83  | 21.83  | 48.3 FOS_FlexIII     | 98.9 YPTFLYK                       | Label:13C(6)15N(2)(K)@7                                               | cleaved L-Y@N-term | 0.00032147  | 938.499695 | 470.2571 | 938.499329 | 470.256928 | 2 | 9  | 17.5983 | 136.39 |
| 26 | 19.01  | 21.04  | 68.3 PPP1R2_FlexIII  | 98.9 YPTFLYK                       | Label:13C(6)15N(2)(K)@7                                               | cleaved S-Y@N-term | 0.00032147  | 938.499695 | 470.2571 | 938.499329 | 470.256928 | 2 | 9  | 17.5983 | 212.16 |
| 28 | 15.45  | 17.52  | 61.8 GEMIN6_FlexIII  | 98.9 YPTFLYK                       | Label:13C(6)15N(2)(K)@7                                               | cleaved Q-Y@N-term | 0.00032147  | 938.499695 | 470.2571 | 938.499329 | 470.256928 | 2 | 9  | 17.5983 | 223.55 |
| 31 | 12     | 14     | 71.3 CDKN2D_FlexIII  | 98.9 YPTFLYK                       | Label:13C(6)15N(2)(K)@7                                               | cleaved L-Y@N-term | 0.00032147  | 938.499695 | 470.2571 | 938.499329 | 470.256928 | 2 | 9  | 17.5983 | 140.15 |
| 44 | 7.38   | 9.59   | 65.8 CEBPG_FlexIII   | 98.9 YPTFLYK                       | Label:13C(6)15N(2)(K)@7                                               | cleaved Q-Y@N-term | 0.00032147  | 938.499695 | 470.2571 | 938.499329 | 470.256928 | 2 | 9  | 17.5983 | 79.94  |
| 53 | 4.63   | 6.81   | 20.1 MYADM_FlexIII   | 98.9 YPTFLYK                       | Label:13C(6)15N(2)(K)@7                                               | cleaved V-Y@N-term | 0.00032147  | 938.499695 | 470.2571 | 938.499329 | 470.256928 | 2 | 9  | 17.5983 | 29.53  |
| 65 | 2      | 4      | 59.6 LIMS1_FlexIII   | 98.9 YPTFLYK                       | Label:13C(6)15N(2)(K)@7                                               |                    | 0.00032147  | 938.499695 | 470.2571 | 938.499329 | 470.256928 | 2 | 9  | 17.5983 | 4.68   |
| 93 | 0.45   | 15.81  | 67.3 CAMK2B_FlexIII  | 98.9 YPTFLYK                       | Label:13C(6)15N(2)(K)@7                                               | cleaved Q-Y@N-term | 0.00032147  | 938.499695 | 470.2571 | 938.499329 | 470.256928 | 2 | 9  | 17.5983 | 20.90  |
| 19 | 28     | 30     | 42.2 FKBP3_FlexIII   | 98.9 FLQEHGSDSFLAEHK               | Label:13C(6)15N(2)(K)@15                                              |                    | -0.00089949 | 1751.83496 | 584.9523 | 1751.83582 | 584.952576 | 3 | 10 | 16.0434 | 106.31 |
| 24 | 19.83  | 21.83  | 48.3 FOS_FlexIII     | 98.9 SALQTEIANLLK                  | Label:13C(6)15N(2)(K)@12                                              |                    | -0.0057869  | 1307.74829 | 654.8814 | 1307.75403 | 654.884277 | 2 | 14 | 19.7554 | 136.39 |
| 14 | 38.32  | 40.36  | 61.0 PPP3CA_FlexIII  | 98.9 AHEAQDAGYR                    | Label:13C(6)15N(4)(R)@10                                              |                    | -0.00386285 | 1126.49915 | 376.507  | 1126.50305 | 376.508301 | 3 | 10 | 9.4068  | 139.34 |
| 1  | 103.53 | 103.53 | 78.6 DNM1L_FlexIII   | 98.8 FISNPNSILAVTAANTDMATSEALK     | Label:13C(6)15N(2)(K)@26                                              |                    | -0.0108377  | 2699.38232 | 900.8014 | 2699.39307 | 900.804993 | 3 | 9  | 26.4247 | 38.55  |
| 1  | 103.53 | 103.53 | 78.6 DNM1L_FlexIII   | 98.8 RLEEPSLR                      | Label:13C(6)15N(4)(R)@1; Label:13C(6)15N(4)(R)@8                      | missed R-L@1       | -0.00224295 | 1018.56513 | 340.529  | 1018.56744 | 340.529755 | 3 | 10 | 15.1622 | 38.55  |
| 1  | 103.53 | 103.53 | 78.6 DNM1L_FlexIII   | 98.8 RPLQLQLVHSVQEDK               | Label:13C(6)15N(4)(R)@1; Deamidated(Q)@6; Label:13C(6)15N(2)(K)@15    |                    | 0.0318869   | 1793.04858 | 598.6901 | 1793.0166  | 598.679504 | 3 | 12 | 17.7805 | 38.55  |
| 1  | 103.53 | 103.53 | 78.6 DNM1L_FlexIII   | 98.8 YPTFLYK                       | Label:13C(6)15N(2)(K)@7                                               | cleaved W-Y@N-term | 0.00093183  | 938.500244 | 470.2574 | 938.499329 | 470.256928 | 2 | 9  | 17.6766 | 38.55  |
| 2  | 66.08  | 68.08  | 40.2 RPS6KA1_FlexIII | 98.8 YPTFLYK                       | Label:13C(6)15N(2)(K)@7                                               | cleaved L-Y@N-term | 0.00093183  | 938.500244 | 470.2574 | 938.499329 | 470.256928 | 2 | 9  | 17.6766 | 114.74 |
| 3  | 60.89  | 62.89  | 59.3 BTRC_FlexIII    | 98.8 YPTFLYK                       | Label:13C(6)15N(2)(K)@7                                               |                    | 0.00093183  | 938.500244 | 470.2574 | 938.499329 | 470.256928 | 2 | 9  | 17.6766 | 41.90  |
| 4  | 58.58  | 60.58  | 70.0 NET1_FlexIII    | 98.8 YPTFLYK                       | Label:13C(6)15N(2)(K)@7                                               | cleaved V-Y@N-term | 0.00093183  | 938.500244 | 470.2574 | 938.499329 | 470.256928 | 2 | 9  | 17.6766 | 4.38   |
| 5  | 56.01  | 58.01  | 69.8 PDK1_FlexIII    | 98.8 YPTFLYK                       | Label:13C(6)15N(2)(K)@7                                               | cleaved A-Y@N-term | 0.00093183  | 938.500244 | 470.2574 | 938.499329 | 470.256928 | 2 | 9  | 17.6766 | 33.22  |
| 6  | 55.31  | 57.32  | 3.8 CDC27_FlexIII    | 98.8 YPTFLYK                       | Label:13C(6)15N(2)(K)@7                                               | cleaved F-Y@N-term | 0.00093183  | 938.500244 | 470.2574 | 938.499329 | 470.256928 | 2 | 9  | 17.6766 | 0.76   |
| 7  | 54.8   | 57     | 71.4 POLR3D_FlexIII  | 98.8 YPTFLYK                       | Label:13C(6)15N(2)(K)@7                                               |                    | 0.00093183  | 938.500244 | 470.2574 | 938.499329 | 470.256928 | 2 | 9  | 17.6766 | 77.94  |
| 8  | 43.77  | 47.77  | 39.1 ODF2_FlexIII    | 98.8 YPTFLYK                       | Label:13C(6)15N(2)(K)@7                                               | cleaved A-Y@N-term | 0.00093183  | 938.500244 | 470.2574 | 938.499329 | 470.256928 | 2 | 9  | 17.6766 | 9.70   |
| 9  | 43.4   | 45.4   | 53.4 FBXW2_FlexIII   | 98.8 YPTFLYK                       | Label:13C(6)15N(2)(K)@7                                               | cleaved G-Y@N-term | 0.00093183  | 938.500244 | 470.2574 | 938.499329 | 470.256928 | 2 | 9  | 17.6766 | 87.11  |
| 10 | 42.4   | 44.59  | 60.6 GPC4_FlexIII    | 98.8 YPTFLYK                       | Label:13C(6)15N(2)(K)@7                                               |                    | 0.00093183  | 938.500244 | 470.2574 | 938.499329 | 470.256928 | 2 | 9  | 17.6766 | 84.97  |
| 11 | 42     | 44     | 63.3 EFEMP1_FlexIII  | 98.8 YPTFLYK                       | Label:13C(6)15N(2)(K)@7                                               | cleaved F-Y@N-term | 0.00093183  | 938.500244 | 470.2574 | 938.499329 | 470.256928 | 2 | 9  | 17.6766 | 50.15  |
| 12 | 41.66  | 43.83  | 57.8 CEACAM5_FlexIII | 98.8 DAVAFCTPEPQDATYLWWVNNQSLVPSPR | Propionamide(C)@7; Label:13C(6)15N(4)(R)@30                           |                    | -0.0216037  | 3517.62842 | 1173.55  | 3517.64868 | 1173.55689 | 3 | 14 | 20.0257 | 162.25 |
| 12 | 41.66  | 43.83  | 57.8 CEACAM5_FlexIII | 98.8 INGIPOQHTQVLFIAK              | Deamidated(Q)@7; Label:13C(6)15N(2)(K)@16                             |                    | -0.00777164 | 1815.00586 | 606.0092 | 1815.01343 | 606.011719 | 3 | 14 | 26.6349 | 162.25 |
| 12 | 41.66  | 43.83  | 57.8 CEACAM5_FlexIII | 98.8 YPTFLYK                       | Label:13C(6)15N(2)(K)@7                                               | cleaved I-Y@N-term | 0.00093183  | 938.500244 | 470.2574 | 938.499329 | 470.256928 | 2 | 9  | 17.6766 | 162.25 |
| 13 | 39.31  | 41.31  | 63.5 CAMK2D_FlexIII  | 98.8 YPTFLYK                       | Label:13C(6)15N(2)(K)@7                                               |                    | 0.00093183  | 938.500244 | 470.2574 | 938.499329 | 470.256928 | 2 | 9  | 17.6766 | 95.69  |
| 14 | 38.32  | 40.36  | 61.0 PPP3CA_FlexIII  | 98.8 YPTFLYK                       | Label:13C(6)15N(2)(K)@7                                               | cleaved Q-Y@N-term | 0.00093183  | 938.500244 | 470.2574 | 938.499329 | 470.256928 | 2 | 9  | 17.6766 | 139.34 |
| 16 | 36.84  | 38.92  | 46.6 C3ORD37_FlexIII | 98.8 YPTFLYK                       | Label:13C(6)15N(2)(K)@7                                               | cleaved Q-Y@N-term | 0.00093183  | 938.500244 | 470.2574 | 938.499329 | 470.256928 | 2 | 9  | 17.6766 | 50.01  |
| 17 | 36     | 38     | 65.3 TOB1_FlexIII    | 98.8 YPTFLYK                       | Label:13C(6)15N(2)(K)@7                                               | cleaved N-Y@N-term | 0.00093183  | 938.500244 | 470.2574 | 938.499329 | 470.256928 | 2 | 9  | 17.6766 | 84.84  |
| 18 | 32.93  | 34.93  | 58.8 CSNK1E_FlexIII  | 98.8 YPTFLYK                       | Label:13C(6)15N(2)(K)@7                                               |                    | 0.00093183  | 938.500244 | 470.2574 | 938        |            |   |    |         |        |

|    |        |        |                      |                                |                                                                                           |                    |             |            |            |            |            |    |         |         |        |
|----|--------|--------|----------------------|--------------------------------|-------------------------------------------------------------------------------------------|--------------------|-------------|------------|------------|------------|------------|----|---------|---------|--------|
| 44 | 7.38   | 9.59   | 65.8 CEBPG_FlexIII   | 98.8 YPTFLYK                   | Label: 13C(6)15N(2)(K)@7                                                                  | cleaved Q-Y@N-term | 0.00093183  | 938.500244 | 470.2574   | 938.499329 | 470.256928 | 2  | 9       | 17.6766 | 79.94  |
| 53 | 4.63   | 6.81   | 20.1 MYADM_FlexIII   | 98.8 YPTFLYK                   | Label: 13C(6)15N(2)(K)@7                                                                  | cleaved V-Y@N-term | 0.00093183  | 938.500244 | 470.2574   | 938.499329 | 470.256928 | 2  | 9       | 17.6766 | 29.53  |
| 65 | 2      | 4      | 59.6 LIMS1_FlexIII   | 98.8 YPTFLYK                   | Label: 13C(6)15N(2)(K)@7                                                                  |                    | 0.00093183  | 938.500244 | 470.2574   | 938.499329 | 470.256928 | 2  | 9       | 17.6766 | 4.68   |
| 93 | 0.45   | 15.81  | 67.3 CAMK2B_FlexIII  | 98.8 YPTFLYK                   | Label: 13C(6)15N(2)(K)@7                                                                  | cleaved Q-Y@N-term | 0.00093183  | 938.500244 | 470.2574   | 938.499329 | 470.256928 | 2  | 9       | 17.6766 | 20.90  |
| 13 | 39.31  | 41.31  | 63.5 CAMK2D_FlexIII  | 98.8 VTEQLIEAINNGDFEAYTK       | Deamidated(Q)@4; Label: 13C(6)15N(2)(K)@19                                                |                    | 0.0257048   | 2163.07129 | 1082.543   | 2163.04639 | 1082.5304  | 2  | 10      | 26.577  | 96.69  |
| 19 | 28     | 30     | 42.2 FKBP3_FlexIII   | 98.8 FKGTESISK                 | Label: 13C(6)15N(4)(R)@2; Label: 13C(6)15N(2)(K)@9                                        | missed K-G@2       | 0.00025806  | 1011.5575  | 338.1931   | 1011.55713 | 338.192993 | 3  | 9       | 13.7181 | 106.31 |
| 13 | 39.31  | 41.31  | 63.5 CAMK2D_FlexIII  | 98.8 FYFENALSK                 | Label: 13C(6)15N(2)(K)@9                                                                  |                    | 0.00074175  | 1125.55933 | 563.7869   | 1125.55859 | 563.78656  | 2  | 12      | 18.0983 | 95.69  |
| 26 | 19.01  | 21.04  | 68.3 PPP1R2_FlexIII  | 98.8 KLAIAEGLEPK               | Label: 13C(6)15N(2)(K)@1; Label: 13C(6)15N(2)(K)@11                                       | missed K-L@1       | -0.00405885 | 1141.66382 | 381.5619   | 1141.66773 | 381.563202 | 3  | 13      | 15.0217 | 212.16 |
| 28 | 15.45  | 17.52  | 61.8 GEMIN6_FlexIII  | 98.8 KGPLEVQDYIYK              | Label: 13C(6)15N(2)(K)@1; Label: 13C(6)15N(2)(K)@12                                       | missed K-G@1       | -6.72E-05   | 1554.8053  | 519.2757   | 1554.8053  | 519.275696 | 3  | 11      | 26.5964 | 223.55 |
| 28 | 15.45  | 17.52  | 61.8 GEMIN6_FlexIII  | 98.8 LMHLFTSGDCK               | Propionamide(C)@10; Label: 13C(6)15N(2)(K)@11                                             |                    | -0.00168636 | 1329.6283  | 444.2167   | 1329.63013 | 444.217316 | 3  | 11      | 17.1972 | 223.55 |
| 1  | 103.53 | 103.53 | 78.6 DNM1L_FlexIII   | 98.8 LYTDFDEIRQEIENETER        | Label: 13C(6)15N(4)(R)@9; Deamidated(N)@14; Label: 13C(6)15N(4)(R)@18                     | missed R-Q@9       | 0.0295401   | 2320.08936 | 1161.052   | 2320.06104 | 1161.03772 | 2  | 12      | 19.0091 | 38.55  |
| 1  | 103.53 | 103.53 | 78.6 DNM1L_FlexIII   | 98.8 SSVLESVLGR                | Label: 13C(6)15N(4)(R)@10                                                                 |                    | -0.00037286 | 1055.58472 | 528.7996   | 1055.58508 | 528.799805 | 2  | 11      | 18.3913 | 38.55  |
| 24 | 19.83  | 21.83  | 48.3 FOS_FlexIII     | 98.8 APHPFGVPAPSAGAYSR         | Label: 13C(6)15N(4)(R)@17                                                                 |                    | 0.00185095  | 1690.84717 | 564.623    | 1690.84546 | 564.622437 | 3  | 12      | 26.5749 | 136.39 |
| 14 | 38.32  | 40.36  | 61.0 PPP3CA_FlexIII  | 98.7 IITEGASILR                | Label: 13C(6)15N(4)(R)@10                                                                 |                    | -9.14E-05   | 1081.63684 | 541.8257   | 1081.63709 | 541.825806 | 2  | 13      | 17.6387 | 139.34 |
| 1  | 103.53 | 103.53 | 78.6 DNM1L_FlexIII   | 98.7 LYTDFDEIR                 | Label: 13C(6)15N(4)(R)@9                                                                  |                    | 0.00023162  | 1180.56433 | 591.2894   | 1180.56397 | 591.289246 | 2  | 11      | 17.7332 | 38.55  |
| 13 | 39.31  | 41.31  | 63.5 CAMK2D_FlexIII  | 98.7 IPTGQEYAAK                | Label: 13C(6)15N(2)(K)@10                                                                 |                    | -0.00667327 | 1084.55762 | 543.2861   | 1084.56445 | 543.28949  | 2  | 12      | 14.6369 | 95.69  |
| 14 | 38.32  | 40.36  | 61.0 PPP3CA_FlexIII  | 98.7 HLTEYFTFK                 | Label: 13C(6)15N(2)(K)@9                                                                  |                    | 0.00103956  | 1192.60193 | 597.3082   | 1192.60083 | 597.307678 | 2  | 13      | 17.5276 | 139.34 |
| 14 | 38.32  | 40.36  | 61.0 PPP3CA_FlexIII  | 98.7 IITEGASILR                | Label: 13C(6)15N(4)(R)@10                                                                 |                    | -0.00033553 | 1081.63672 | 541.8256   | 1081.63709 | 541.825806 | 2  | 13      | 17.1296 | 139.34 |
| 14 | 38.32  | 40.36  | 61.0 PPP3CA_FlexIII  | 98.7 IITEGASILR                | Label: 13C(6)15N(4)(R)@10                                                                 |                    | -0.00033553 | 1081.63672 | 541.8256   | 1081.63709 | 541.825806 | 2  | 13      | 17.1372 | 139.34 |
| 14 | 38.32  | 40.36  | 61.0 PPP3CA_FlexIII  | 98.7 IITEGASILR                | Label: 13C(6)15N(4)(R)@10                                                                 |                    | -0.00054618 | 1071.6283  | 536.8214   | 1071.62878 | 536.821655 | 2  | 13      | 17.1928 | 139.34 |
| 14 | 38.32  | 40.36  | 61.0 PPP3CA_FlexIII  | 98.7 IITEGASILR                |                                                                                           | 6.42E-05           | 1071.62891  | 536.8217   | 1071.62878 | 536.821655 | 2          | 13 | 17.2303 | 139.34  |        |
| 13 | 39.31  | 41.31  | 63.5 CAMK2D_FlexIII  | 98.6 GAILTTMLATR               | Label: 13C(6)15N(4)(R)@11                                                                 |                    | -0.00036963 | 1156.65112 | 579.3328   | 1156.65137 | 579.332947 | 2  | 12      | 18.6048 | 95.69  |
| 13 | 39.31  | 41.31  | 63.5 CAMK2D_FlexIII  | 98.6 IPTGQEYAAK                | Label: 13C(6)15N(2)(K)@10                                                                 |                    | -0.00667327 | 1084.55762 | 543.2861   | 1084.56445 | 543.28949  | 2  | 12      | 14.6489 | 95.69  |
| 93 | 0.45   | 15.81  | 67.3 CAMK2B_FlexIII  | 98.6 GAILTTMLATR               | Label: 13C(6)15N(4)(R)@11                                                                 |                    | -0.00036963 | 1156.65112 | 579.3328   | 1156.65137 | 579.332947 | 2  | 12      | 18.6048 | 20.90  |
| 1  | 103.53 | 103.53 | 78.6 DNM1L_FlexIII   | 98.6 LGGIGVVNR                 | Label: 13C(6)15N(4)(R)@9                                                                  |                    | -0.00059005 | 949.594299 | 475.8044   | 949.594849 | 475.804688 | 2  | 10      | 17.6855 | 38.55  |
| 1  | 103.53 | 103.53 | 78.6 DNM1L_FlexIII   | 98.6 YPTFLYK                   | Label: 13C(6)15N(2)(K)@7                                                                  | cleaved W-Y@N-term | 0.00056561  | 938.499878 | 470.2572   | 938.499329 | 470.256928 | 2  | 9       | 17.6185 | 38.55  |
| 2  | 66.08  | 68.08  | 40.2 RPS6KA1_FlexIII | 98.6 YPTFLYK                   | Label: 13C(6)15N(2)(K)@7                                                                  | cleaved L-Y@N-term | 0.00056561  | 938.499878 | 470.2572   | 938.499329 | 470.256928 | 2  | 9       | 17.6185 | 114.74 |
| 3  | 60.89  | 62.89  | 59.3 BTRC_FlexIII    | 98.6 YPTFLYK                   | Label: 13C(6)15N(2)(K)@7                                                                  |                    | 0.00056561  | 938.499878 | 470.2572   | 938.499329 | 470.256928 | 2  | 9       | 17.6185 | 41.90  |
| 4  | 58.58  | 60.58  | 70.0 NET1_FlexIII    | 98.6 YPTFLYK                   | Label: 13C(6)15N(2)(K)@7                                                                  | cleaved V-Y@N-term | 0.00056561  | 938.499878 | 470.2572   | 938.499329 | 470.256928 | 2  | 9       | 17.6185 | 4.38   |
| 5  | 56.01  | 58.01  | 69.8 PDK1_FlexIII    | 98.6 YPTFLYK                   | Label: 13C(6)15N(2)(K)@7                                                                  | cleaved A-Y@N-term | 0.00056561  | 938.499878 | 470.2572   | 938.499329 | 470.256928 | 2  | 9       | 17.6185 | 33.22  |
| 6  | 55.31  | 57.32  | 3.8 CDC27_FlexIII    | 98.6 YPTFLYK                   | Label: 13C(6)15N(2)(K)@7                                                                  | cleaved F-Y@N-term | 0.00056561  | 938.499878 | 470.2572   | 938.499329 | 470.256928 | 2  | 9       | 17.6185 | 0.76   |
| 7  | 54.8   | 57     | 71.4 POLR3D_FlexIII  | 98.6 DVSVAELLR                 | Label: 13C(6)15N(4)(R)@9                                                                  |                    | 0.00084685  | 1010.56445 | 506.2895   | 1010.5636  | 506.289063 | 2  | 9       | 18.5844 | 77.94  |
| 7  | 54.8   | 57     | 71.4 POLR3D_FlexIII  | 98.6 YPTFLYK                   | Label: 13C(6)15N(2)(K)@7                                                                  |                    | 0.00056561  | 938.499878 | 470.2572   | 938.499329 | 470.256928 | 2  | 9       | 17.6185 | 77.94  |
| 8  | 43.77  | 47.77  | 39.1 ODF2_FlexIII    | 98.6 YPTFLYK                   | Label: 13C(6)15N(2)(K)@7                                                                  | cleaved A-Y@N-term | 0.00056561  | 938.499878 | 470.2572   | 938.499329 | 470.256928 | 2  | 9       | 17.6185 | 9.70   |
| 9  | 43.4   | 45.4   | 53.4 FBXW2_FlexIII   | 98.6 YPTFLYK                   | Label: 13C(6)15N(2)(K)@7                                                                  | cleaved G-Y@N-term | 0.00056561  | 938.499878 | 470.2572   | 938.499329 | 470.256928 | 2  | 9       | 17.6185 | 87.11  |
| 10 | 42.4   | 44.59  | 60.6 GPC4_FlexIII    | 98.6 YPTFLYK                   | Label: 13C(6)15N(2)(K)@7                                                                  |                    | 0.00056561  | 938.499878 | 470.2572   | 938.499329 | 470.256928 | 2  | 9       | 17.6185 | 84.97  |
| 11 | 42     | 44     | 63.3 EFEMP1_FlexIII  | 98.6 YPTFLYK                   | Label: 13C(6)15N(2)(K)@7                                                                  | cleaved F-Y@N-term | 0.00056561  | 938.499878 | 470.2572   | 938.499329 | 470.256928 | 2  | 9       | 17.6185 | 50.15  |
| 12 | 41.66  | 43.83  | 57.8 CEACAM5_FlexIII | 98.6 YPTFLYK                   | Label: 13C(6)15N(2)(K)@7                                                                  | cleaved I-Y@N-term | 0.00056561  | 938.499878 | 470.2572   | 938.499329 | 470.256928 | 2  | 9       | 17.6185 | 162.25 |
| 13 | 39.31  | 41.31  | 63.5 CAMK2D_FlexIII  | 98.6 YPTFLYK                   | Label: 13C(6)15N(2)(K)@7                                                                  |                    | 0.00056561  | 938.499878 | 470.2572   | 938.499329 | 470.256928 | 2  | 9       | 17.6185 | 95.69  |
| 14 | 38.32  | 40.36  | 61.0 PPP3CA_FlexIII  | 98.6 YPTFLYK                   | Label: 13C(6)15N(2)(K)@7                                                                  | cleaved Q-Y@N-term | 0.00056561  | 938.499878 | 470.2572   | 938.499329 | 470.256928 | 2  | 9       | 17.6185 | 139.34 |
| 16 | 36.84  | 38.92  | 46.6 C3ORD37_FlexIII | 98.6 YPTFLYK                   | Label: 13C(6)15N(2)(K)@7                                                                  | cleaved Q-Y@N-term | 0.00056561  | 938.499878 | 470.2572   | 938.499329 | 470.256928 | 2  | 9       | 17.6185 | 50.01  |
| 17 | 36     | 38     | 65.3 TOB1_FlexIII    | 98.6 YPTFLYK                   | Label: 13C(6)15N(2)(K)@7                                                                  | cleaved N-Y@N-term | 0.00056561  | 938.499878 | 470.2572   | 938.499329 | 470.256928 | 2  | 9       | 17.6185 | 84.84  |
| 18 | 32.93  | 34.93  | 58.8 CSNK1E_FlexIII  | 98.6 YPTFLYK                   | Label: 13C(6)15N(2)(K)@7                                                                  |                    | 0.00056561  | 938.499878 | 470.2572   | 938.499329 | 470.256928 | 2  | 9       | 17.6185 | 24.43  |
| 19 | 28     | 30     | 42.2 FKBP3_FlexIII   | 98.6 YPTFLYK                   | Label: 13C(6)15N(2)(K)@7                                                                  | cleaved D-Y@N-term | 0.00056561  | 938.499878 | 470.2572   | 938.499329 | 470.256928 | 2  | 9       | 17.6185 | 106.31 |
| 24 | 19.83  | 21.83  | 48.3 FOS_FlexIII     | 98.6 YPTFLYK                   | Label: 13C(6)15N(2)(K)@7                                                                  | cleaved L-Y@N-term | 0.00056561  | 938.499878 | 470.2572   | 938.499329 | 470.256928 | 2  | 9       | 17.6185 | 136.39 |
| 26 | 19.01  | 21.04  | 68.3 PPP1R2_FlexIII  | 98.6 YPTFLYK                   | Label: 13C(6)15N(2)(K)@7                                                                  | cleaved S-Y@N-term | 0.00056561  | 938.499878 | 470.2572   | 938.499329 | 470.256928 | 2  | 9       | 17.6185 | 212.16 |
| 28 | 15.45  | 17.52  | 61.8 GEMIN6_FlexIII  | 98.6 YPTFLYK                   | Label: 13C(6)15N(2)(K)@7                                                                  | cleaved Q-Y@N-term | 0.00056561  | 938.499878 | 470.2572   | 938.499329 | 470.256928 | 2  | 9       | 17.6185 | 223.55 |
| 31 | 12     | 14     | 71.3 CDKN2D_FlexIII  | 98.6 YPTFLYK                   | Label: 13C(6)15N(2)(K)@7                                                                  | cleaved L-Y@N-term | 0.00056561  | 938.499878 | 470.2572   | 938.499329 | 470.256928 | 2  | 9       | 17.6185 | 140.15 |
| 44 | 7.38   | 9.59   | 65.8 CEBPG_FlexIII   | 98.6 YPTFLYK                   | Label: 13C(6)15N(2)(K)@7                                                                  | cleaved Q-Y@N-term | 0.00056561  | 938.499878 | 470.2572   | 938.499329 | 470.256928 | 2  | 9       | 17.6185 | 79.94  |
| 53 | 4.63   | 6.81   | 20.1 MYADM_FlexIII   | 98.6 YPTFLYK                   | Label: 13C(6)15N(2)(K)@7                                                                  | cleaved V-Y@N-term | 0.00056561  | 938.499878 | 470.2572   | 938.499329 | 470.256928 | 2  | 9       | 17.6185 | 29.53  |
| 65 | 2      | 4      | 59.6 LIMS1_FlexIII   | 98.6 YPTFLYK                   | Label: 13C(6)15N(2)(K)@7                                                                  |                    | 0.00056561  | 938.499878 | 470.2572   | 938.499329 | 470.256928 | 2  | 9       | 17.6185 | 4.68   |
| 93 | 0.45   | 15.81  | 67.3 CAMK2B_FlexIII  | 98.6 YPTFLYK                   | Label: 13C(6)15N(2)(K)@7                                                                  | cleaved Q-Y@N-term | 0.00056561  | 938.499878 | 470.2572   | 938.499329 | 470.256928 | 2  | 9       | 17.6185 | 20.90  |
| 12 | 41.66  | 43.83  | 57.8 CEACAM5_FlexIII | 98.6 CETQNPVSAR                | Propionamide(C)@1; Label: 13C(6)15N(4)(R)@10                                              |                    | -4.09E-05   | 1184.54822 | 593.2814   | 1184.54834 | 593.281433 | 2  | 13      | 13.82   | 162.25 |
| 10 | 42.4   | 44.59  | 60.6 GPC4_FlexIII    | 98.6 DFEFFK                    | Label: 13C(6)15N(2)(K)@6                                                                  |                    | -0.0016784  | 839.332883 | 420.7037   | 839.394531 | 420.704529 | 2  | 7       | 17.9077 | 84.97  |
| 13 | 39.31  | 41.31  | 63.5 CAMK2D_FlexIII  | 98.5 ICDPGLTAFEPEALGNLVEGMDFHR | Propionamide(C)@2; Deamidated(N)@16; Label: 13C(6)15N(4)(R)@25                            |                    | 0.0276204   | 2812.33496 | 938.4523   | 2812.30762 | 938.443115 | 3  | 10      | 26.5973 | 95.69  |
| 13 | 39.31  | 41.31  | 63.5 CAMK2D_FlexIII  | 98.5 LTQYMDGSGMPK              | Label: 13C(6)15N(2)(K)@12                                                                 |                    | 0.00073506  | 1334.60962 | 668.3121   | 1334.60901 | 668.311768 | 2  | 12      | 16.3737 | 95.69  |
| 1  | 103.53 | 103.53 | 78.6 DNM1L_FlexIII   | 98.5 HPDFADACGLMNNINIEQRR      | Propionamide(C)@8; Deamidated(N)@12; Label: 13C(6)15N(4)(R)@19; Label: 13C(6)15N(4)(R)@20 | missed R-R@19      | 0.0210898   | 2421.0918  | 606.2802   | 2421.07056 | 606.274902 | 4  | 12      | 16.7969 | 38.55  |
| 1  | 103.53 | 103.53 | 78.6 DNM1L_FlexIII   | 98.5 TLAVITK                   | Label: 13C(6)15N(2)(K)@7                                                                  |                    | -0.00179245 | 752.487061 | 377.2508   | 752.48877  | 377.251648 | 2  | 10      | 15.7939 | 38.55  |
| 26 | 19.01  | 21.04  | 68.3 PPP1R2_FlexIII  | 98.5 TSTTSSMVASAEOPR           | Label: 13C(6)15N(4)(R)@15                                                                 |                    | -0.00412588 | 1561.72412 | 781.8693   | 1561.72815 | 781.871338 | 2  | 8       | 0.1783  | 212.16 |
| 14 | 38.32  | 40.36  | 61.0 PPP3CA_FlexIII  | 98.5 AHEAQDAGYR                | Label: 13C(6)15N(4)(R)@10                                                                 |                    | 0.00126413  | 1126.50427 | 376.5087   | 1126.50305 | 376.508301 | 3  | 10      | 9.3721  | 139.34 |
| 14 | 38.32  | 40.36  | 61.0 PPP3CA_FlexIII  | 98.5 DAMPSDANLNSINK            | Label: 13C(6)15N(2)(K)@14                                                                 |                    | 0.000503053 | 1496.70703 | 749.3608   | 1496.70203 | 749.358276 | 2  | 11      | 26.6591 | 139.34 |
| 14 | 38.32  | 40.36  | 61.0 PPP3CA_FlexIII  | 98.5 EGRLEESVALR               |                                                                                           |                    |             |            |            |            |            |    |         |         |        |

|    |        |        |      |                |      |                           |                                                                                                 |                |             |            |          |            |            |   |    |         |        |
|----|--------|--------|------|----------------|------|---------------------------|-------------------------------------------------------------------------------------------------|----------------|-------------|------------|----------|------------|------------|---|----|---------|--------|
| 14 | 38.32  | 40.36  | 61.0 | PPP3CA_FlexII  | 98.4 | VFSVLREESESVLTLK          | Label:13C(6)15N(4)(R)@6; Label:13C(6)15N(2)(K)@16                                               | missed R-E @6  | -0.00019233 | 1853.02625 | 618.6827 | 1853.02649 | 618.6828   | 3 | 13 | 18.5396 | 139.34 |
| 10 | 42.4   | 44.59  | 60.6 | GPC4_FlexII    | 98.4 | FDEFFK                    | Label:13C(6)15N(2)(K)@6                                                                         |                | -0.0016784  | 839.392883 | 420.7037 | 839.394531 | 420.704529 | 2 | 7  | 17.8799 | 84.97  |
| 10 | 42.4   | 44.59  | 60.6 | GPC4_FlexII    | 98.4 | ISDAIMNMQDNSVQVSQK        | Label:13C(6)15N(2)(K)@18                                                                        |                | -0.00611901 | 2014.94751 | 1008.481 | 2014.95435 | 1008.48444 | 2 | 8  | 20.6817 | 84.97  |
| 10 | 42.4   | 44.59  | 60.6 | GPC4_FlexII    | 98.4 | NDAPLHEINGDHLK            | Label:13C(6)15N(2)(K)@14                                                                        |                | -0.00248043 | 1579.78101 | 395.9525 | 1579.78345 | 395.953125 | 4 | 10 | 15.2893 | 84.97  |
| 10 | 42.4   | 44.59  | 60.6 | GPC4_FlexII    | 98.4 | NDAPLHEINGDHLK            | Label:13C(6)15N(2)(K)@14                                                                        |                | -0.00248043 | 1579.78101 | 395.9525 | 1579.78345 | 395.953125 | 4 | 10 | 15.2969 | 84.97  |
| 10 | 42.4   | 44.59  | 60.6 | GPC4_FlexII    | 98.4 | NDAPLHEINGDHLK            | Label:13C(6)15N(2)(K)@14                                                                        |                | -0.00211422 | 1579.78137 | 395.9526 | 1579.78345 | 395.953125 | 4 | 10 | 15.3597 | 84.97  |
| 10 | 42.4   | 44.59  | 60.6 | GPC4_FlexII    | 98.4 | TFAQGLAVAGDVVSK           | Deamidated(Q)@4; Label:13C(6)15N(2)(K)@15                                                       |                | 0.0254715   | 1470.80652 | 736.4105 | 1470.78101 | 736.397766 | 2 | 9  | 21.1852 | 84.97  |
| 1  | 103.53 | 103.53 | 78.6 | DNM1L_FlexII   | 98.4 | KNQDQSPVK                 | Label:13C(6)15N(2)(K)@1; Label:13C(6)15N(2)(K)@9                                                | missed K-N @1  | -0.00209085 | 1043.59265 | 348.8715 | 1043.5946  | 348.872131 | 3 | 10 | 14.2547 | 38.55  |
| 1  | 103.53 | 103.53 | 78.6 | DNM1L_FlexII   | 98.4 | LGIIQGVNVR                | Label:13C(6)15N(4)(R)@9                                                                         |                | -0.00022384 | 949.594666 | 475.8046 | 949.594849 | 475.804688 | 2 | 10 | 17.645  | 38.55  |
| 7  | 54.8   | 57     | 71.4 | POLR3D_FlexII  | 98.3 | DVSVAEILLR                | Label:13C(6)15N(4)(R)@9                                                                         |                | 0.00084685  | 1010.56445 | 506.2895 | 1010.5636  | 506.289063 | 2 | 9  | 18.587  | 77.94  |
| 7  | 54.8   | 57     | 71.4 | POLR3D_FlexII  | 98.3 | DVSVAEILLR                | Label:13C(6)15N(4)(R)@9                                                                         |                | 0.0014572   | 1010.56506 | 506.2898 | 1010.5636  | 506.289063 | 2 | 9  | 18.6528 | 77.94  |
| 7  | 54.8   | 57     | 71.4 | POLR3D_FlexII  | 98.3 | VQLLLGK                   | Label:13C(6)15N(2)(K)@7                                                                         |                | 0.00029066  | 777.520691 | 389.7676 | 777.520386 | 389.767456 | 2 | 8  | 17.1896 | 77.94  |
| 7  | 54.8   | 57     | 71.4 | POLR3D_FlexII  | 98.3 | VQLLLGK                   | Label:13C(6)15N(2)(K)@7                                                                         |                | 0.00029066  | 777.520691 | 389.7676 | 777.520386 | 389.767456 | 2 | 8  | 17.2427 | 77.94  |
| 14 | 38.32  | 40.36  | 61.0 | PPP3CA_FlexII  | 98.3 | AHEAQDAGYR                | Label:13C(6)15N(4)(R)@10                                                                        |                | -0.00386285 | 1126.49915 | 376.507  | 1126.50305 | 376.508301 | 3 | 8  | 10.8752 | 139.34 |
| 14 | 38.32  | 40.36  | 61.0 | PPP3CA_FlexII  | 98.3 | AHEAQDAGYR                | Label:13C(6)15N(4)(R)@10                                                                        |                | 0.00126413  | 1126.50427 | 376.5087 | 1126.50305 | 376.508301 | 3 | 9  | 11.5069 | 139.34 |
| 14 | 38.32  | 40.36  | 61.0 | PPP3CA_FlexII  | 98.3 | YENNVMNIR                 | Label:13C(6)15N(4)(R)@9                                                                         |                | -1.56E-05   | 1161.54773 | 581.7811 | 1161.54761 | 581.781067 | 2 | 12 | 16.4711 | 139.34 |
| 14 | 38.32  | 40.36  | 61.0 | PPP3CA_FlexII  | 98.2 | IITEGASILR                | Label:13C(6)15N(4)(R)@10                                                                        |                | -0.0013121  | 1081.63562 | 541.8251 | 1081.63709 | 541.825806 | 2 | 12 | 17.1071 | 139.34 |
| 14 | 38.32  | 40.36  | 61.0 | PPP3CA_FlexII  | 98.2 | IITEGASILR                | Label:13C(6)15N(4)(R)@10                                                                        |                | -0.00033553 | 1081.63672 | 541.8256 | 1081.63709 | 541.825806 | 2 | 12 | 17.17   | 139.34 |
| 14 | 38.32  | 40.36  | 61.0 | PPP3CA_FlexII  | 98.2 | IITEGASILR                | Label:13C(6)15N(4)(R)@10                                                                        |                | -0.00033553 | 1081.63672 | 541.8256 | 1081.63709 | 541.825806 | 2 | 12 | 17.6564 | 139.34 |
| 14 | 38.32  | 40.36  | 61.0 | PPP3CA_FlexII  | 98.2 | YENNVMNIR                 | Label:13C(6)15N(4)(R)@9                                                                         |                | -0.000626   | 1161.54712 | 581.7808 | 1161.54761 | 581.781067 | 2 | 12 | 16.4365 | 139.34 |
| 14 | 38.32  | 40.36  | 61.0 | PPP3CA_FlexII  | 98.2 | YENNVMNIR                 | Label:13C(6)15N(4)(R)@9                                                                         |                | -0.000626   | 1161.54712 | 581.7808 | 1161.54761 | 581.781067 | 2 | 12 | 16.4388 | 139.34 |
| 13 | 39.31  | 41.31  | 63.5 | CAMK2D_FlexII  | 98.2 | FTDEYQLFEELGK             | Label:13C(6)15N(2)(K)@13                                                                        |                | -0.00433355 | 1625.76611 | 813.8903 | 1625.77051 | 813.892517 | 2 | 12 | 19.2887 | 95.69  |
| 26 | 19.01  | 21.04  | 68.3 | PPP1R2_FlexII  | 98.2 | TSTTSSMVASAEQPR           | Label:13C(6)15N(4)(R)@15                                                                        |                | 0.00244081  | 1561.73071 | 781.8726 | 1561.72815 | 781.871338 | 2 | 13 | 15.3718 | 212.16 |
| 26 | 19.01  | 21.04  | 68.3 | PPP1R2_FlexII  | 98.2 | TSTTSSMVASAEQPR           | Label:13C(6)15N(4)(R)@15                                                                        |                | -0.00130758 | 1561.72681 | 521.5829 | 1561.72815 | 521.583313 | 3 | 13 | 15.4037 | 212.16 |
| 26 | 19.01  | 21.04  | 68.3 | PPP1R2_FlexII  | 98.2 | TSTTSSMVASAEQPR           | Label:13C(6)15N(4)(R)@15                                                                        |                | -0.00130758 | 1561.72681 | 521.5829 | 1561.72815 | 521.583313 | 3 | 13 | 15.4062 | 212.16 |
| 26 | 19.01  | 21.04  | 68.3 | PPP1R2_FlexII  | 98.2 | TSTTSSMVASAEQPR           | Label:13C(6)15N(4)(R)@15                                                                        |                | -0.00075826 | 1561.72754 | 521.5831 | 1561.72815 | 521.583313 | 3 | 13 | 15.4334 | 212.16 |
| 26 | 19.01  | 21.04  | 68.3 | PPP1R2_FlexII  | 98.2 | TSTTSSMVASAEQPR           | Label:13C(6)15N(4)(R)@15                                                                        |                | 0.00341738  | 1561.73145 | 781.873  | 1561.72815 | 781.871338 | 2 | 13 | 15.4683 | 212.16 |
| 7  | 54.8   | 57     | 71.4 | POLR3D_FlexII  | 98.2 | DLTLGGVK                  | Label:13C(6)15N(2)(K)@8                                                                         |                | 0.0006348   | 809.474487 | 405.7445 | 809.473816 | 405.744171 | 2 | 8  | 16.6445 | 77.94  |
| 12 | 41.66  | 43.83  | 57.8 | CEACAM5_FlexII | 98.2 | QIIGYVIGTQQATPGPAYSGR     | Deamidated(Q)@10; Label:13C(6)15N(4)(R)@21                                                      |                | 0.00593959  | 2187.12622 | 730.0493 | 2187.11987 | 730.047241 | 3 | 14 | 26.5761 | 162.25 |
| 1  | 103.53 | 103.53 | 78.6 | DNM1L_FlexII   | 98.1 | CVELVHEEMOR               | Propionamide(C)@12; Label:13C(6)15N(4)(R)@11                                                    |                | -0.00014351 | 1452.67273 | 485.2315 | 1452.67285 | 485.231567 | 3 | 11 | 15.6665 | 38.55  |
| 1  | 103.53 | 103.53 | 78.6 | DNM1L_FlexII   | 98.1 | ICYIFHETFGR               | Propionamide(C)@2; Label:13C(6)15N(4)(R)@11                                                     |                | -0.00094146 | 1465.70398 | 489.5753 | 1465.7052  | 489.575653 | 3 | 11 | 17.6728 | 38.55  |
| 1  | 103.53 | 103.53 | 78.6 | DNM1L_FlexII   | 98.1 | ICYIFHETFGR               | Propionamide(C)@2; Label:13C(6)15N(4)(R)@11                                                     |                | -0.00094146 | 1465.70398 | 489.5753 | 1465.7052  | 489.575653 | 3 | 11 | 17.7006 | 38.55  |
| 1  | 103.53 | 103.53 | 78.6 | DNM1L_FlexII   | 98.1 | LGIIQGVNVR                | Label:13C(6)15N(4)(R)@9                                                                         |                | 0.00978597  | 949.604675 | 475.8096 | 949.594849 | 475.804688 | 2 | 10 | 17.6147 | 38.55  |
| 1  | 103.53 | 103.53 | 78.6 | DNM1L_FlexII   | 98.1 | LGIIQGVNVR                | Label:13C(6)15N(4)(R)@9                                                                         |                | -0.00059005 | 949.594299 | 475.8044 | 949.594849 | 475.804688 | 2 | 9  | 18.1938 | 38.55  |
| 1  | 103.53 | 103.53 | 78.6 | DNM1L_FlexII   | 98.1 | RLEEPSLR                  | Label:13C(6)15N(4)(R)@1; Label:13C(6)15N(4)(R)@8                                                | missed R-L @1  | -0.00251761 | 1018.56488 | 340.5289 | 1018.56744 | 340.529755 | 3 | 10 | 15.1847 | 38.55  |
| 19 | 28     | 30     | 42.2 | FKBP3_FlexII   | 98.1 | FKGTESISK                 | Label:13C(6)15N(2)(K)@2; Label:13C(6)15N(2)(K)@9                                                | missed K-G @2  | -0.00038282 | 1011.55689 | 338.1929 | 1011.55713 | 338.192993 | 3 | 9  | 13.7762 | 106.31 |
| 24 | 19.83  | 21.83  | 48.3 | FOS_FlexII     | 98.1 | SALQTEIANLLK              | Label:13C(6)15N(2)(K)@12                                                                        |                | -0.00859453 | 1307.74548 | 654.88   | 1307.75403 | 654.884277 | 2 | 13 | 20.2939 | 136.39 |
| 24 | 19.83  | 21.83  | 48.3 | FOS_FlexII     | 98.1 | VEQLSPREEEK               | Label:13C(6)15N(2)(K)@11                                                                        |                | 0.00060625  | 1323.62903 | 662.8218 | 1323.62854 | 662.821533 | 2 | 13 | 14.6979 | 136.39 |
| 24 | 19.83  | 21.83  | 48.3 | FOS_FlexII     | 98.1 | VEQLSPREEEK               | Label:13C(6)15N(2)(K)@11                                                                        |                | -0.00037032 | 1323.6283  | 662.8214 | 1323.62854 | 662.821533 | 2 | 13 | 14.7441 | 136.39 |
| 26 | 19.01  | 21.04  | 68.3 | PPP1R2_FlexII  | 98.0 | TSTTSSMVASAEQPR           | Label:13C(6)15N(4)(R)@15                                                                        |                | 0.00060974  | 1561.72864 | 781.8716 | 1561.72815 | 781.871338 | 2 | 10 | 23.6154 | 212.16 |
| 14 | 38.32  | 40.36  | 61.0 | PPP3CA_FlexII  | 97.9 | EVFNDNGKPR                | Label:13C(6)15N(2)(K)@8; Label:13C(6)15N(4)(R)@10                                               |                | -0.00078587 | 1193.57886 | 597.7967 | 1193.57959 | 597.797058 | 2 | 12 | 14.1026 | 139.34 |
| 24 | 19.83  | 21.83  | 48.3 | FOS_FlexII     | 97.9 | SALQTEIANLLK              | Label:13C(6)15N(2)(K)@12                                                                        |                | -0.00615311 | 1307.74793 | 654.8812 | 1307.75403 | 654.884277 | 2 | 13 | 19.7858 | 136.39 |
| 24 | 19.83  | 21.83  | 48.3 | FOS_FlexII     | 97.9 | SALQTEIANLLK              | Label:13C(6)15N(2)(K)@12                                                                        |                | -0.0057869  | 1307.74829 | 654.8814 | 1307.75403 | 654.884277 | 2 | 13 | 20.2635 | 136.39 |
| 1  | 103.53 | 103.53 | 78.6 | DNM1L_FlexII   | 97.9 | LGIIQGVNVR                | Label:13C(6)15N(2)(K)@12                                                                        |                | -0.00060342 | 939.58606  | 470.8003 | 939.586548 | 470.800537 | 2 | 10 | 17.6779 | 38.55  |
| 12 | 41.66  | 43.83  | 57.8 | CEACAM5_FlexII | 97.9 | EVLLLVHNLPHQLFGYSWYKGER   | Deamidated(N)@8; Label:13C(6)15N(2)(K)@20; Label:13C(6)15N(4)(R)@23                             | missed K-G @20 | 0.0109511   | 2816.48779 | 705.1292 | 2816.47681 | 705.126526 | 4 | 14 | 18.9492 | 162.25 |
| 1  | 103.53 | 103.53 | 78.6 | DNM1L_FlexII   | 97.8 | NIQDQSPVK                 | Label:13C(6)15N(2)(K)@8                                                                         |                | -0.00083046 | 907.48468  | 454.7496 | 907.485474 | 454.75     | 2 | 10 | 14.889  | 38.55  |
| 13 | 39.31  | 41.31  | 63.5 | CAMK2D_FlexII  | 97.8 | SGSPTVPIK                 | Label:13C(6)15N(2)(K)@9                                                                         |                | -0.00181666 | 892.509094 | 447.2618 | 892.510925 | 447.262756 | 2 | 11 | 15.2391 | 95.69  |
| 28 | 15.45  | 17.52  | 61.8 | GEMIN6_FlexII  | 97.8 | VTASEKNEYK                | Label:13C(6)15N(2)(K)@6; Label:13C(6)15N(2)(K)@10                                               | missed K-N @6  | -0.00284427 | 1183.60266 | 395.5415 | 1183.60599 | 395.54245  | 3 | 9  | 8.6136  | 223.55 |
| 14 | 38.32  | 40.36  | 61.0 | PPP3CA_FlexII  | 97.8 | FKEPPAYGPMCDILWSDPLDFGNEK | Label:13C(6)15N(2)(K)@2; Propionamide(C)@11; Deamidated(N)@24; Label:13C(6)15N(2)(K)@26         | missed K-E @2  | 0.0193652   | 3085.42432 | 1029.482 | 3085.40061 | 1029.47595 | 3 | 13 | 20.0602 | 139.34 |
| 14 | 38.32  | 40.36  | 61.0 | PPP3CA_FlexII  | 97.8 | LFEVGGSPANTR              | Label:13C(6)15N(4)(R)@12                                                                        |                | 0.00032953  | 1256.63928 | 629.3269 | 1256.63892 | 629.326721 | 2 | 12 | 16.6787 | 139.34 |
| 14 | 38.32  | 40.36  | 61.0 | PPP3CA_FlexII  | 97.8 | LFEVGGSPANTR              |                                                                                                 |                | -0.00134598 | 1246.62927 | 624.3219 | 1246.63062 | 624.322571 | 2 | 12 | 16.6863 | 139.34 |
| 44 | 7.38   | 9.59   | 65.8 | CEBPG_FlexII   | 97.8 | VNQLKEENER                | Label:13C(6)15N(2)(K)@5; Label:13C(6)15N(4)(R)@10                                               | missed K-E @5  | -0.0155963  | 1275.63818 | 426.22   | 1275.65381 | 426.22522  | 3 | 8  | 10.7034 | 79.94  |
| 1  | 103.53 | 103.53 | 78.6 | DNM1L_FlexII   | 97.7 | SSVLSPVLGR                | Label:13C(6)15N(4)(R)@10                                                                        |                | -6.65E-06   | 1055.58508 | 528.7998 | 1055.58508 | 528.799805 | 2 | 9  | 26.4657 | 38.55  |
| 16 | 36.84  | 38.92  | 46.6 | C3ORD37_FlexII | 97.7 | WGLVPSWFK                 | Label:13C(6)15N(2)(K)@9                                                                         |                | -0.00134781 | 1126.60413 | 564.3093 | 1126.60547 | 564.309988 | 2 | 9  | 20.0428 | 50.01  |
| 13 | 39.31  | 41.31  | 63.5 | CAMK2D_FlexII  | 97.7 | ITASEALK                  | Label:13C(6)15N(2)(K)@8                                                                         |                | -0.0020302  | 839.4823   | 420.7484 | 839.484375 | 420.749481 | 2 | 11 | 15.1777 | 95.69  |
| 10 | 42.4   | 44.59  | 60.6 | GPC4_FlexII    | 97.8 | NDAPLHEINGDHLK            | Deamidated(N)@9; Label:13C(6)15N(2)(K)@14                                                       |                | 0.00024556  | 1580.76758 | 527.9298 | 1580.76746 | 527.929749 | 3 | 10 | 26.739  | 84.97  |
| 1  | 103.53 | 103.53 | 78.6 | DNM1L_FlexII   | 97.6 | VPVGDDPK                  | Label:13C(6)15N(2)(K)@8                                                                         |                | -0.00149591 | 846.467651 | 424.2411 | 846.469055 | 424.241821 | 2 | 7  | 11.9622 | 38.55  |
| 24 | 19.83  | 21.83  | 48.3 | FOS_FlexII     | 97.6 | EKLEFLAAHRPACK            | Label:13C(6)15N(2)(K)@2; Label:13C(6)15N(4)(R)@11; Propionamide(C)@14; Label:13C(6)15N(2)(K)@15 | missed K-L @2  | -0.0144115  | 1821.99902 | 608.3403 | 1822.01343 | 608        |   |    |         |        |

|    |        |        |      |                 |      |                                          |                                                                         |                    |             |            |          |            |            |   |    |         |        |
|----|--------|--------|------|-----------------|------|------------------------------------------|-------------------------------------------------------------------------|--------------------|-------------|------------|----------|------------|------------|---|----|---------|--------|
| 26 | 19.01  | 21.04  | 68.3 | PPP1R2_FlexIII  | 97.5 | KLAAAEGLEPK                              | Label: 13C(6)15N(2)(K)@1; Label: 13C(6)15N(2)(K)@11                     | missed K-L@1       | -0.00469972 | 1141.66296 | 381.5616 | 1141.66773 | 381.563202 | 3 | 12 | 15.1937 | 212.16 |
| 26 | 19.01  | 21.04  | 68.3 | PPP1R2_FlexIII  | 97.5 | LHYNELGNLK                               | Label: 13C(6)15N(2)(K)@10                                               |                    | -0.00293175 | 1207.64099 | 403.5543 | 1207.64404 | 403.555298 | 3 | 12 | 15.8813 | 212.16 |
| 26 | 19.01  | 21.04  | 68.3 | PPP1R2_FlexIII  | 97.5 | LHYNELGNLK                               | Label: 13C(6)15N(2)(K)@10                                               |                    | -0.00293175 | 1207.64099 | 403.5543 | 1207.64404 | 403.555298 | 3 | 12 | 15.9079 | 212.16 |
| 93 | 0.45   | 15.81  | 67.3 | CAMK2B_FlexIII  | 97.5 | NSKPIHTTLNPHVHVIGEDAACAIAYIR             | Label: 13C(6)15N(2)(K)@3; Propionamide(C)@23; Label: 13C(6)15N(4)(R)@28 |                    | -0.0587735  | 3170.73657 | 793.6914 | 3170.67773 | 793.676697 | 4 | 12 | 17.6186 | 20.90  |
| 12 | 41.66  | 43.83  | 57.8 | CEACAM5_FlexIII | 97.4 | EIYPNASSLLQNIQNDTGFTYLVHVK               | Label: 13C(6)15N(2)(K)@28                                               |                    | -0.0195033  | 3237.73413 | 1080.252 | 3237.75293 | 1080.2583  | 3 | 13 | 20.536  | 162.25 |
| 12 | 41.66  | 43.83  | 57.8 | CEACAM5_FlexIII | 97.4 | INGIPQOHTQVLFIAK                         | Label: 13C(6)15N(2)(K)@16                                               |                    | -0.00117387 | 1814.02808 | 605.6833 | 1814.02942 | 605.683716 | 3 | 13 | 17.4037 | 162.25 |
| 12 | 41.66  | 43.83  | 57.8 | CEACAM5_FlexIII | 97.4 | LLLTASLLTFWNPPTTAK                       | Label: 13C(6)15N(2)(K)@18                                               |                    | -0.00878475 | 1994.12451 | 998.0695 | 1994.13318 | 998.073853 | 2 | 11 | 20.9936 | 162.25 |
| 12 | 41.66  | 43.83  | 57.8 | CEACAM5_FlexIII | 97.4 | SDLVNEEATGQFR                            | Label: 13C(6)15N(4)(R)@13                                               |                    | -0.00885836 | 1474.68384 | 738.3492 | 1474.69275 | 738.353638 | 2 | 11 | 22.6957 | 162.25 |
| 1  | 103.53 | 103.53 | 78.6 | DNM1L_FlexIII   | 97.4 | DIELQIR                                  | Label: 13C(6)15N(4)(R)@7                                                |                    | -0.0085518  | 895.499451 | 448.757  | 895.500244 | 448.757416 | 2 | 9  | 17.3402 | 38.55  |
| 1  | 103.53 | 103.53 | 78.6 | DNM1L_FlexIII   | 97.4 | YPTFLYK                                  | Label: 13C(6)15N(2)(K)@7                                                | cleaved W-Y@N-term | -0.00056627 | 938.498901 | 470.2567 | 938.499329 | 470.256928 | 2 | 9  | 17.7762 | 38.55  |
| 2  | 66.08  | 68.08  | 40.2 | RPS6KA1_FlexIII | 97.4 | YPTFLYK                                  | Label: 13C(6)15N(2)(K)@7                                                | cleaved L-Y@N-term | -0.00056627 | 938.498901 | 470.2567 | 938.499329 | 470.256928 | 2 | 9  | 17.7762 | 114.74 |
| 3  | 60.89  | 62.89  | 59.3 | BTRC_FlexIII    | 97.4 | YPTFLYK                                  | Label: 13C(6)15N(2)(K)@7                                                |                    | -0.00056627 | 938.498901 | 470.2567 | 938.499329 | 470.256928 | 2 | 9  | 17.7762 | 41.90  |
| 4  | 58.58  | 60.58  | 70.0 | NET1_FlexIII    | 97.4 | YPTFLYK                                  | Label: 13C(6)15N(2)(K)@7                                                | cleaved V-Y@N-term | -0.00056627 | 938.498901 | 470.2567 | 938.499329 | 470.256928 | 2 | 9  | 17.7762 | 4.38   |
| 5  | 56.01  | 58.01  | 69.8 | PK1_FlexIII     | 97.4 | YPTFLYK                                  | Label: 13C(6)15N(2)(K)@7                                                | cleaved A-Y@N-term | -0.00056627 | 938.498901 | 470.2567 | 938.499329 | 470.256928 | 2 | 9  | 17.7762 | 33.22  |
| 6  | 55.31  | 57.32  | 3.8  | CDC27_FlexIII   | 97.4 | YPTFLYK                                  | Label: 13C(6)15N(2)(K)@7                                                | cleaved F-Y@N-term | -0.00056627 | 938.498901 | 470.2567 | 938.499329 | 470.256928 | 2 | 9  | 17.7762 | 0.76   |
| 7  | 54.8   | 57     | 71.4 | POLR3D_FlexIII  | 97.4 | YPTFLYK                                  | Label: 13C(6)15N(2)(K)@7                                                |                    | -0.00056627 | 938.498901 | 470.2567 | 938.499329 | 470.256928 | 2 | 9  | 17.7762 | 77.94  |
| 8  | 43.77  | 47.77  | 39.1 | ODF2_FlexIII    | 97.4 | YPTFLYK                                  | Label: 13C(6)15N(2)(K)@7                                                | cleaved A-Y@N-term | -0.00056627 | 938.498901 | 470.2567 | 938.499329 | 470.256928 | 2 | 9  | 17.7762 | 9.70   |
| 9  | 43.4   | 45.4   | 53.4 | FBXW2_FlexIII   | 97.4 | YPTFLYK                                  | Label: 13C(6)15N(2)(K)@7                                                | cleaved G-Y@N-term | -0.00056627 | 938.498901 | 470.2567 | 938.499329 | 470.256928 | 2 | 9  | 17.7762 | 87.11  |
| 10 | 42.4   | 44.59  | 60.6 | GPC4_FlexIII    | 97.4 | YPTFLYK                                  | Label: 13C(6)15N(2)(K)@7                                                |                    | -0.00056627 | 938.498901 | 470.2567 | 938.499329 | 470.256928 | 2 | 9  | 17.7762 | 84.97  |
| 11 | 42     | 44     | 63.3 | EFEMP1_FlexIII  | 97.4 | YPTFLYK                                  | Label: 13C(6)15N(2)(K)@7                                                | cleaved F-Y@N-term | -0.00056627 | 938.498901 | 470.2567 | 938.499329 | 470.256928 | 2 | 9  | 17.7762 | 50.15  |
| 12 | 41.66  | 43.83  | 57.8 | CEACAM5_FlexIII | 97.4 | YPTFLYK                                  | Label: 13C(6)15N(2)(K)@7                                                | cleaved I-Y@N-term | -0.00056627 | 938.498901 | 470.2567 | 938.499329 | 470.256928 | 2 | 9  | 17.7762 | 162.25 |
| 13 | 39.31  | 41.31  | 63.5 | CAMK2D_FlexIII  | 97.4 | ICDPGLTAFEALGNLVEGMDFHR                  | Propionamide(C)@2; Label: 13C(6)15N(4)(R)@25                            |                    | -0.00845103 | 2811.31519 | 938.1123 | 2811.32349 | 938.115112 | 3 | 8  | 26.6075 | 95.69  |
| 13 | 39.31  | 41.31  | 63.5 | CAMK2D_FlexIII  | 97.4 | SGSPTVPIK                                | Label: 13C(6)15N(2)(K)@9                                                |                    | -0.00163355 | 892.509277 | 447.2619 | 892.510925 | 447.262756 | 2 | 11 | 15.3069 | 95.69  |
| 13 | 39.31  | 41.31  | 63.5 | CAMK2D_FlexIII  | 97.4 | YPTFLYK                                  | Label: 13C(6)15N(2)(K)@7                                                |                    | -0.00056627 | 938.498901 | 470.2567 | 938.499329 | 470.256928 | 2 | 9  | 17.7762 | 95.69  |
| 14 | 38.32  | 40.36  | 61.0 | PPP3CA_FlexIII  | 97.4 | YPTFLYK                                  | Label: 13C(6)15N(2)(K)@7                                                | cleaved Q-Y@N-term | -0.00056627 | 938.498901 | 470.2567 | 938.499329 | 470.256928 | 2 | 9  | 17.7762 | 139.34 |
| 16 | 36.84  | 38.92  | 46.6 | C3ORD37_FlexIII | 97.4 | YPTFLYK                                  | Label: 13C(6)15N(2)(K)@7                                                | cleaved Q-Y@N-term | -0.00056627 | 938.498901 | 470.2567 | 938.499329 | 470.256928 | 2 | 9  | 17.7762 | 50.01  |
| 17 | 36     | 38     | 65.3 | TOB1_FlexIII    | 97.4 | YPTFLYK                                  | Label: 13C(6)15N(2)(K)@7                                                | cleaved N-Y@N-term | -0.00056627 | 938.498901 | 470.2567 | 938.499329 | 470.256928 | 2 | 9  | 17.7762 | 84.84  |
| 18 | 32.93  | 34.93  | 58.8 | CSNK1E_FlexIII  | 97.4 | YPTFLYK                                  | Label: 13C(6)15N(2)(K)@7                                                |                    | -0.00056627 | 938.498901 | 470.2567 | 938.499329 | 470.256928 | 2 | 9  | 17.7762 | 24.43  |
| 19 | 28     | 30     | 42.2 | FKBP3_FlexIII   | 97.4 | YPTFLYK                                  | Label: 13C(6)15N(2)(K)@7                                                | cleaved D-Y@N-term | -0.00056627 | 938.498901 | 470.2567 | 938.499329 | 470.256928 | 2 | 9  | 17.7762 | 106.31 |
| 24 | 19.83  | 21.83  | 48.3 | FOS_FlexIII     | 97.4 | YPTFLYK                                  | Label: 13C(6)15N(2)(K)@7                                                | cleaved L-Y@N-term | -0.00056627 | 938.498901 | 470.2567 | 938.499329 | 470.256928 | 2 | 9  | 17.7762 | 136.39 |
| 26 | 19.01  | 21.04  | 68.3 | PPP1R2_FlexIII  | 97.4 | YPTFLYK                                  | Label: 13C(6)15N(2)(K)@7                                                | cleaved S-Y@N-term | -0.00056627 | 938.498901 | 470.2567 | 938.499329 | 470.256928 | 2 | 9  | 17.7762 | 212.16 |
| 28 | 15.45  | 17.52  | 61.8 | GEMIN6_FlexIII  | 97.4 | YPTFLYK                                  | Label: 13C(6)15N(2)(K)@7                                                |                    | -0.00056627 | 938.498901 | 470.2567 | 938.499329 | 470.256928 | 2 | 9  | 17.7762 | 223.55 |
| 31 | 12     | 14     | 71.3 | CDKN2D_FlexIII  | 97.4 | YPTFLYK                                  | Label: 13C(6)15N(2)(K)@7                                                | cleaved L-Y@N-term | -0.00056627 | 938.498901 | 470.2567 | 938.499329 | 470.256928 | 2 | 9  | 17.7762 | 140.15 |
| 44 | 7.38   | 9.59   | 65.8 | CEBPG_FlexIII   | 97.4 | YPTFLYK                                  | Label: 13C(6)15N(2)(K)@7                                                | cleaved Q-Y@N-term | -0.00056627 | 938.498901 | 470.2567 | 938.499329 | 470.256928 | 2 | 9  | 17.7762 | 79.94  |
| 53 | 4.63   | 6.81   | 20.1 | MYADM_FlexIII   | 97.4 | YPTFLYK                                  | Label: 13C(6)15N(2)(K)@7                                                | cleaved V-Y@N-term | -0.00056627 | 938.498901 | 470.2567 | 938.499329 | 470.256928 | 2 | 9  | 17.7762 | 29.53  |
| 65 | 2      | 4      | 59.6 | LIMS1_FlexIII   | 97.4 | YPTFLYK                                  | Label: 13C(6)15N(2)(K)@7                                                |                    | -0.00056627 | 938.498901 | 470.2567 | 938.499329 | 470.256928 | 2 | 9  | 17.7762 | 4.68   |
| 93 | 0.45   | 15.81  | 67.3 | CAMK2B_FlexIII  | 97.4 | YPTFLYK                                  | Label: 13C(6)15N(2)(K)@7                                                | cleaved Q-Y@N-term | -0.00056627 | 938.498901 | 470.2567 | 938.499329 | 470.256928 | 2 | 9  | 17.7762 | 20.90  |
| 24 | 19.83  | 21.83  | 48.3 | FOS_FlexIII     | 97.4 | APHPGFVPAPSAGAYSR                        | Label: 13C(6)15N(4)(R)@17                                               |                    | 0.00185095  | 1690.84717 | 564.623  | 1690.84546 | 564.622437 | 3 | 12 | 26.5774 | 136.39 |
| 44 | 7.38   | 9.59   | 65.8 | CEBPG_FlexIII   | 97.3 | ISOQNSTPGVNGISVIHTQAHASGLQVQQLVPAGPGGGGK | Label: 13C(6)15N(2)(K)@41                                               |                    | -0.00844491 | 3994.07813 | 999.5268 | 3994.08643 | 999.52887  | 4 | 11 | 17.448  | 79.94  |
| 44 | 7.38   | 9.59   | 65.8 | CEBPG_FlexIII   | 97.3 | ISOQNSTPGVNGISVIHTQAHASGLQVQQLVPAGPGGGGK | Label: 13C(6)15N(2)(K)@41                                               |                    | -0.00844491 | 3994.07813 | 999.5268 | 3994.08643 | 999.52887  | 4 | 11 | 17.4631 | 79.94  |
| 44 | 7.38   | 9.59   | 65.8 | CEBPG_FlexIII   | 97.3 | VNQLKEENER                               | Label: 13C(6)15N(2)(K)@5; Label: 13C(6)15N(4)(R)@10                     | missed K-E@5       | -0.00030702 | 1275.65344 | 426.2251 | 1275.65381 | 426.22522  | 3 | 9  | 11.2126 | 79.94  |
| 44 | 7.38   | 9.59   | 65.8 | CEBPG_FlexIII   | 97.3 | VNQLKEENER                               | Label: 13C(6)15N(2)(K)@5; Label: 13C(6)15N(4)(R)@10                     | missed K-E@5       | 0.014433    | 1275.66821 | 426.23   | 1275.65381 | 426.22522  | 3 | 8  | 12.7887 | 79.94  |
| 1  | 103.53 | 103.53 | 78.6 | DNM1L_FlexIII   | 97.3 | IFSPNVNLTLDVLPGMTK                       | Label: 13C(6)15N(2)(K)@19                                               |                    | 0.0119622   | 2065.14941 | 1033.582 | 2065.13721 | 1033.57593 | 2 | 7  | 26.4963 | 38.55  |
| 1  | 103.53 | 103.53 | 78.6 | DNM1L_FlexIII   | 97.3 | LGIGGVNVR                                | Label: 13C(6)15N(2)(K)@7                                                |                    | -0.00078653 | 939.585877 | 470.8002 | 939.586548 | 470.800537 | 2 | 10 | 17.7307 | 38.55  |
| 13 | 39.31  | 41.31  | 63.5 | CAMK2D_FlexIII  | 97.2 | STVASMMHR                                | Label: 13C(6)15N(4)(R)@9                                                |                    | -0.00013658 | 1028.47693 | 515.2457 | 1028.47705 | 515.24585  | 2 | 11 | 15.1146 | 95.69  |
| 93 | 0.45   | 15.81  | 67.3 | CAMK2B_FlexIII  | 97.2 | STVASMMHR                                | Label: 13C(6)15N(4)(R)@9                                                |                    | -0.00013658 | 1028.47693 | 515.2457 | 1028.47705 | 515.24585  | 2 | 11 | 15.1146 | 20.90  |
| 28 | 15.45  | 17.52  | 61.8 | GEMIN6_FlexIII  | 97.2 | LMHLFTSGDCK                              | Propionamide(C)@10; Label: 13C(6)15N(2)(K)@11                           |                    | -0.00168636 | 1329.6283  | 444.2167 | 1329.63013 | 444.217316 | 3 | 11 | 16.7666 | 223.55 |
| 28 | 15.45  | 17.52  | 61.8 | GEMIN6_FlexIII  | 97.2 | LMHLFTSGDCK                              | Propionamide(C)@10                                                      |                    | -0.00141164 | 1321.61438 | 441.5454 | 1321.61585 | 441.545898 | 3 | 11 | 16.8117 | 223.55 |
| 28 | 15.45  | 17.52  | 61.8 | GEMIN6_FlexIII  | 97.2 | LMHLFTSGDCK                              | Propionamide(C)@10; Label: 13C(6)15N(2)(K)@11                           |                    | -0.00077083 | 1329.62915 | 444.217  | 1329.63013 | 444.217316 | 3 | 11 | 16.8445 | 223.55 |
| 28 | 15.45  | 17.52  | 61.8 | GEMIN6_FlexIII  | 97.2 | NHPIETEQQDAPR                            | Label: 13C(6)15N(4)(R)@13                                               |                    | -0.00125573 | 1456.72864 | 486.5835 | 1456.72986 | 486.583893 | 3 | 11 | 14.6615 | 223.55 |
| 1  | 103.53 | 103.53 | 78.6 | DNM1L_FlexIII   | 97.2 | SOLDINNKK                                | Label: 13C(6)15N(2)(K)@8; Label: 13C(6)15N(2)(K)@9                      | missed K-K@8       | -0.00334779 | 1074.59705 | 359.2063 | 1074.60046 | 359.207428 | 3 | 9  | 13.5385 | 38.55  |
| 12 | 41.66  | 43.83  | 57.8 | CEACAM5_FlexIII | 97.1 | TLTLTSVTR                                | Label: 13C(6)15N(4)(R)@9                                                |                    | 0.0003507   | 1012.61585 | 507.3152 | 1012.6156  | 507.315094 | 2 | 12 | 18.0963 | 162.25 |
| 17 | 36     | 38     | 65.3 | TOB1_FlexIII    | 97.1 | GNLPQDLVSWIDPFVSYQIGEK                   | Deamidated(N)@2; Label: 13C(6)15N(2)(K)@23                              |                    | 0.0317184   | 2642.3313  | 1322.173 | 2642.29956 | 1322.1571  | 2 | 13 | 20.5079 | 84.84  |
| 1  | 103.53 | 103.53 | 78.6 | DNM1L_FlexIII   | 97.1 | YPTFLYK                                  | Label: 13C(6)15N(2)(K)@7                                                | cleaved W-Y@N-term | -0.00093249 | 938.498474 | 470.2565 | 938.499329 | 470.256928 | 2 | 9  | 17.7358 | 38.55  |
| 2  | 66.08  | 68.08  | 40.2 | RPS6KA1_FlexIII | 97.1 | YPTFLYK                                  | Label: 13C(6)15N(2)(K)@7                                                | cleaved L-Y@N-term | -0.00093249 | 938.498474 | 470.2565 | 938.499329 | 470.256928 | 2 | 9  | 17.7358 | 114.74 |
| 3  | 60.89  | 62.89  | 59.3 | BTRC_FlexIII    | 97.1 | YPTFLYK                                  | Label: 13C(6)15N(2)(K)@7                                                |                    | -0.00093249 | 938.498474 | 470.2565 | 938.499329 | 470.256928 | 2 | 9  | 17.7358 | 41.90  |
| 4  | 58.58  | 60.58  | 70.0 | NET1_FlexIII    | 97.1 | YPTFLYK                                  | Label: 13C(6)15N(2)(K)@7                                                | cleaved V-Y@N-term | -0.00093249 | 938.498474 | 470.2565 | 938.499329 | 470.256928 | 2 | 9  | 17.7358 | 4.38   |
| 5  | 56.01  | 58.01  | 69.8 | PK1_FlexIII     | 97.1 | YPTFLYK                                  | Label: 13C(6)15N(2)(K)@7                                                | cleaved A-Y@N-term | -0.00093249 | 938.498474 | 470.2565 | 938.499329 | 470.256928 | 2 | 9  | 17.7358 | 33.22  |
| 6  | 55.31  | 57.32  | 3.8  | CDC27_FlexIII   | 97   |                                          |                                                                         |                    |             |            |          |            |            |   |    |         |        |

|    |        |        |                      |                                              |                                                                                         |                    |             |            |          |            |            |   |    |         |        |
|----|--------|--------|----------------------|----------------------------------------------|-----------------------------------------------------------------------------------------|--------------------|-------------|------------|----------|------------|------------|---|----|---------|--------|
| 16 | 36.84  | 38.92  | 46.6 C3ORD37_FlexIII | 97.1 YPTFLYK                                 | Label:13C(6)15N(2)(K)@7                                                                 | cleaved Q-Y@N-term | -0.00093249 | 938.498474 | 470.2565 | 938.499329 | 470.256928 | 2 | 9  | 17.7358 | 50.01  |
| 17 | 36     | 38     | 65.3 TOB1_FlexIII    | 97.1 YPTFLYK                                 | Label:13C(6)15N(2)(K)@7                                                                 | cleaved N-Y@N-term | -0.00093249 | 938.498474 | 470.2565 | 938.499329 | 470.256928 | 2 | 9  | 17.7358 | 84.84  |
| 18 | 32.93  | 34.93  | 58.8 CSNK1E_FlexIII  | 97.1 YPTFLYK                                 | Label:13C(6)15N(2)(K)@7                                                                 |                    | -0.00093249 | 938.498474 | 470.2565 | 938.499329 | 470.256928 | 2 | 9  | 17.7358 | 24.43  |
| 19 | 28     | 30     | 42.2 FKBP3_FlexIII   | 97.1 YPTFLYK                                 | Label:13C(6)15N(2)(K)@7                                                                 | cleaved D-Y@N-term | -0.00093249 | 938.498474 | 470.2565 | 938.499329 | 470.256928 | 2 | 9  | 17.7358 | 106.31 |
| 24 | 19.83  | 21.83  | 48.3 FOS_FlexIII     | 97.1 YPTFLYK                                 | Label:13C(6)15N(2)(K)@7                                                                 | cleaved L-Y@N-term | -0.00093249 | 938.498474 | 470.2565 | 938.499329 | 470.256928 | 2 | 9  | 17.7358 | 136.39 |
| 26 | 19.01  | 21.04  | 68.3 PPP1R2_FlexIII  | 97.1 YPTFLYK                                 | Label:13C(6)15N(2)(K)@7                                                                 | cleaved S-Y@N-term | -0.00093249 | 938.498474 | 470.2565 | 938.499329 | 470.256928 | 2 | 9  | 17.7358 | 212.16 |
| 28 | 15.45  | 17.52  | 61.8 GEMIN6_FlexIII  | 97.1 YPTFLYK                                 | Label:13C(6)15N(2)(K)@7                                                                 | cleaved Q-Y@N-term | -0.00093249 | 938.498474 | 470.2565 | 938.499329 | 470.256928 | 2 | 9  | 17.7358 | 223.55 |
| 31 | 12     | 14     | 71.3 CDKN2D_FlexIII  | 97.1 YPTFLYK                                 | Label:13C(6)15N(2)(K)@7                                                                 | cleaved L-Y@N-term | -0.00093249 | 938.498474 | 470.2565 | 938.499329 | 470.256928 | 2 | 9  | 17.7358 | 140.15 |
| 44 | 7.38   | 9.59   | 65.8 CEBPG_FlexIII   | 97.1 YPTFLYK                                 | Label:13C(6)15N(2)(K)@7                                                                 | cleaved Q-Y@N-term | -0.00093249 | 938.498474 | 470.2565 | 938.499329 | 470.256928 | 2 | 9  | 17.7358 | 79.94  |
| 53 | 4.63   | 6.81   | 20.1 MYADM_FlexIII   | 97.1 YPTFLYK                                 | Label:13C(6)15N(2)(K)@7                                                                 | cleaved V-Y@N-term | -0.00093249 | 938.498474 | 470.2565 | 938.499329 | 470.256928 | 2 | 9  | 17.7358 | 29.53  |
| 65 | 2      | 4      | 59.6 LIMS1_FlexIII   | 97.1 YPTFLYK                                 | Label:13C(6)15N(2)(K)@7                                                                 |                    | -0.00093249 | 938.498474 | 470.2565 | 938.499329 | 470.256928 | 2 | 9  | 17.7358 | 4.68   |
| 93 | 0.45   | 15.81  | 67.3 CAMK2B_FlexIII  | 97.1 YPTFLYK                                 | Label:13C(6)15N(2)(K)@7                                                                 | cleaved Q-Y@N-term | -0.00093249 | 938.498474 | 470.2565 | 938.499329 | 470.256928 | 2 | 9  | 17.7358 | 20.90  |
| 13 | 39.31  | 41.31  | 63.5 CAMK2D_FlexIII  | 97.1 WQNVHFHR                                | Label:13C(6)15N(4)(R)@8                                                                 |                    | -4.68E-05   | 1132.55542 | 567.285  | 1132.55542 | 567.284973 | 2 | 11 | 15.0597 | 95.69  |
| 12 | 41.66  | 43.83  | 57.8 CEACAM5_FlexIII | 97.0 TLTLSSVTR                               | Label:13C(6)15N(4)(R)@8                                                                 |                    | -0.00025966 | 1012.6153  | 507.3149 | 1012.6156  | 507.315094 | 2 | 12 | 18.1238 | 162.25 |
| 12 | 41.66  | 43.83  | 57.8 CEACAM5_FlexIII | 97.0 TLTLSSVTR                               | Label:13C(6)15N(4)(R)@9                                                                 |                    | 5.26E-06    | 1002.6073  | 502.3109 | 1002.60736 | 502.310944 | 2 | 11 | 18.1668 | 162.25 |
| 31 | 12     | 14     | 71.3 CDKN2D_FlexIII  | 97.0 TALOVMMFGSTAIALLLK                      | Deamidated(O)@4; Label:13C(6)15N(2)(K)@19                                               |                    | 0.0026545   | 2045.10584 | 682.7092 | 2045.10327 | 682.708374 | 3 | 13 | 20.7829 | 140.15 |
| 1  | 103.53 | 103.53 | 78.6 DNM1L_FlexIII   | 97.0 GHAVNLLDVPPVVAR                         | Deamidated(N)@5; Label:13C(6)15N(4)(R)@15                                               |                    | 0.0317679   | 1566.90759 | 523.3098 | 1566.87573 | 523.299194 | 3 | 11 | 18.1062 | 38.55  |
| 14 | 38.32  | 40.36  | 61.0 PPP3CA_FlexIII  | 97.0 VFSVLREESVLTUK                          | Label:13C(6)15N(4)(R)@6; Label:13C(6)15N(2)(K)@16                                       | missed R-E@6       | -0.00080691 | 1853.01856 | 618.6801 | 1853.02649 | 618.6828   | 3 | 12 | 18.522  | 139.34 |
| 13 | 39.31  | 41.31  | 63.5 CAMK2D_FlexIII  | 97.0 STVASMMHR                               | Label:13C(6)15N(4)(R)@9                                                                 |                    | -0.00038073 | 1028.47669 | 515.2456 | 1028.47705 | 515.24585  | 2 | 11 | 15.1684 | 95.69  |
| 13 | 39.31  | 41.31  | 63.5 CAMK2D_FlexIII  | 97.0 STVASMMHR                               | Label:13C(6)15N(4)(R)@9                                                                 |                    | -0.00111315 | 1028.47583 | 515.2452 | 1028.47705 | 515.24585  | 2 | 11 | 15.2273 | 95.69  |
| 13 | 39.31  | 41.31  | 63.5 CAMK2D_FlexIII  | 97.0 WQNVHFHR                                | Label:13C(6)15N(4)(R)@8                                                                 |                    | 0.00056356  | 1132.55603 | 567.2853 | 1132.55542 | 567.284973 | 2 | 11 | 15.0279 | 95.69  |
| 93 | 0.45   | 15.81  | 67.3 CAMK2B_FlexIII  | 97.0 STVASMMHR                               | Label:13C(6)15N(4)(R)@9                                                                 |                    | -0.00038073 | 1028.47669 | 515.2456 | 1028.47705 | 515.24585  | 2 | 11 | 15.1684 | 20.90  |
| 93 | 0.45   | 15.81  | 67.3 CAMK2B_FlexIII  | 97.0 STVASMMHR                               | Label:13C(6)15N(4)(R)@9                                                                 |                    | -0.00111315 | 1028.47583 | 515.2452 | 1028.47705 | 515.24585  | 2 | 11 | 15.2273 | 20.90  |
| 1  | 103.53 | 103.53 | 78.6 DNM1L_FlexIII   | 96.9 KYPSLANR                                | Label:13C(6)15N(2)(K)@1; Label:13C(6)15N(4)(R)@8                                        | missed K-Y@1       | -0.00044142 | 965.540894 | 483.7777 | 965.541321 | 483.777954 | 2 | 10 | 14.8841 | 38.55  |
| 18 | 32.93  | 34.93  | 58.8 CSNK1E_FlexIII  | 96.9 MSTPIEVLCK                              | Propionamide(C)@9; Label:13C(6)15N(2)(K)@10                                             |                    | -0.00025333 | 1198.61792 | 600.3162 | 1198.61816 | 600.316345 | 2 | 11 | 17.8531 | 24.43  |
| 28 | 15.45  | 17.52  | 61.8 GEMIN6_FlexIII  | 96.9 TLCVAGVLTIDPPYDPENCSSSNEILSR            | Propionamide(C)@3; Propionamide(C)@19; Label:13C(6)15N(4)(R)@29                         |                    | 0.0134945   | 3257.59741 | 1086.873 | 3257.58228 | 1086.86804 | 3 | 7  | 27.0308 | 223.55 |
| 24 | 19.83  | 21.83  | 48.3 FOS_FlexIII     | 96.9 SALQTEIANLLK                            | Label:13C(6)15N(2)(K)@12                                                                |                    | -0.00700761 | 1307.74707 | 654.8808 | 1307.75403 | 654.884277 | 2 | 12 | 19.8443 | 136.39 |
| 26 | 19.01  | 21.04  | 68.3 PPP1R2_FlexIII  | 96.8 DLHDDDEDEEMLETADGESMNTTEESNQGSTPSDQOQNK | Label:13C(6)15N(2)(K)@38                                                                |                    | 0.0193236   | 4275.70117 | 1426.241 | 4275.68164 | 1426.2345  | 3 | 9  | 26.8057 | 212.16 |
| 26 | 19.01  | 21.04  | 68.3 PPP1R2_FlexIII  | 96.8 DLHDDDEDEEMLETADGESMNTTEESNQGSTPSDQOQNK | Deamidated(N)@26; Label:13C(6)15N(2)(K)@38                                              |                    | 0.0420294   | 4276.70654 | 1426.576 | 4276.66553 | 1426.5625  | 3 | 8  | 27.2351 | 212.16 |
| 26 | 19.01  | 21.04  | 68.3 PPP1R2_FlexIII  | 96.8 DLHDDDEDEEMLETADGESMNTTEESNQGSTPSDQOQNK | Label:13C(6)15N(2)(K)@38                                                                |                    | 0.00613986  | 4275.68604 | 1426.236 | 4275.68164 | 1426.2345  | 3 | 7  | 27.2812 | 212.16 |
| 26 | 19.01  | 21.04  | 68.3 PPP1R2_FlexIII  | 96.8 LAAAEGLPEK                              | Label:13C(6)15N(2)(K)@10                                                                |                    | -0.00042042 | 1005.55829 | 503.7864 | 1005.55859 | 503.786591 | 2 | 11 | 15.6721 | 212.16 |
| 26 | 19.01  | 21.04  | 68.3 PPP1R2_FlexIII  | 96.8 TSTTSSMVASAEQPR                         | Label:13C(6)15N(4)(R)@15                                                                |                    | 0.00015728  | 1561.72827 | 521.5834 | 1561.72815 | 521.583313 | 3 | 12 | 14.1977 | 212.16 |
| 26 | 19.01  | 21.04  | 68.3 PPP1R2_FlexIII  | 96.8 TSTTSSMVASAEQPR                         | Label:13C(6)15N(4)(R)@15                                                                |                    | 0.00060974  | 1561.72864 | 781.8716 | 1561.72815 | 781.871338 | 2 | 12 | 14.2229 | 212.16 |
| 26 | 19.01  | 21.04  | 68.3 PPP1R2_FlexIII  | 96.8 TSTTSSMVASAEQPR                         | Label:13C(6)15N(4)(R)@15                                                                |                    | -0.00075826 | 1561.72754 | 521.5831 | 1561.72815 | 521.583313 | 3 | 12 | 15.503  | 212.16 |
| 1  | 103.53 | 103.53 | 78.6 DNM1L_FlexIII   | 96.7 DIELOIR                                 | Label:13C(6)15N(4)(R)@7                                                                 |                    | -0.00085518 | 895.499451 | 448.757  | 895.500244 | 448.757416 | 2 | 9  | 17.3179 | 38.55  |
| 1  | 103.53 | 103.53 | 78.6 DNM1L_FlexIII   | 96.7 FISNPNSIILAVTAANTDMATSEALK              | Deamidated(N)@6; Label:13C(6)15N(2)(K)@26                                               |                    | 0.0148013   | 2700.39136 | 1351.203 | 2700.3772  | 1351.1958  | 2 | 8  | 21.1409 | 38.55  |
| 26 | 19.01  | 21.04  | 68.3 PPP1R2_FlexIII  | 96.8 WDEMNLATYHPADKDYGLMK                    | Deamidated(N)@5; Label:13C(6)15N(2)(K)@15; Label:13C(6)15N(2)(K)@21                     | missed K-D@15      | 0.0396122   | 2527.21289 | 632.8105 | 2527.17334 | 632.800659 | 4 | 12 | 26.6521 | 212.16 |
| 13 | 39.31  | 41.31  | 63.5 CAMK2D_FlexIII  | 96.5 SNKPIHTILNPHVHLVGDDAACIAYIR             | Label:13C(6)15N(2)(K)@3; Deamidated(N)@11; Propionamide(C)@23; Label:13C(6)15N(4)(R)@28 |                    | 0.0139768   | 3169.69653 | 793.4314 | 3169.68262 | 793.427918 | 4 | 12 | 26.7452 | 95.69  |
| 1  | 103.53 | 103.53 | 78.6 DNM1L_FlexIII   | 96.5 FISNPNSIILAVTAANTDMATSEALK              | Deamidated(N)@16; Label:13C(6)15N(2)(K)@26                                              |                    | 0.0252316   | 2700.40234 | 901.1414 | 2700.3772  | 901.132996 | 3 | 10 | 21.246  | 38.55  |
| 1  | 103.53 | 103.53 | 78.6 DNM1L_FlexIII   | 96.5 RPLILQLVHVSQEDK                         | Label:13C(6)15N(4)(R)@1; Deamidated(Q)@12; Label:13C(6)15N(2)(K)@15                     |                    | 0.00185745  | 1793.01856 | 598.6801 | 1793.0166  | 598.679504 | 3 | 11 | 26.8997 | 38.55  |
| 1  | 103.53 | 103.53 | 78.6 DNM1L_FlexIII   | 96.5 VPVGDPQK                                | Label:13C(6)15N(2)(K)@8                                                                 |                    | -0.00149591 | 846.467651 | 424.2411 | 846.469055 | 424.241821 | 2 | 7  | 12.4933 | 38.55  |
| 9  | 43.4   | 45.4   | 53.4 FBXW2_FlexIII   | 96.4 IWPIGR                                  | Label:13C(6)15N(4)(R)@6                                                                 |                    | -0.00019671 | 750.441467 | 376.228  | 750.441589 | 376.228088 | 2 | 6  | 17.6576 | 87.11  |
| 12 | 41.66  | 43.83  | 57.8 CEACAM5_FlexIII | 96.4 SDLVNEATGQFR                            | Label:13C(6)15N(4)(R)@13                                                                |                    | -0.00083836 | 1474.68384 | 738.3492 | 1474.69275 | 738.353638 | 2 | 10 | 22.0116 | 162.25 |
| 2  | 66.08  | 68.08  | 40.2 RPS6KA1_FlexIII | 96.4 ADPSHFELLK                              | Label:13C(6)15N(2)(K)@10                                                                |                    | -0.00369553 | 1163.60291 | 388.8749 | 1163.60657 | 388.87616  | 3 | 8  | 16.8816 | 114.74 |
| 2  | 66.08  | 68.08  | 40.2 RPS6KA1_FlexIII | 96.4 ADPSHFELLK                              | Label:13C(6)15N(2)(K)@10                                                                |                    | -0.00369553 | 1163.60291 | 388.8749 | 1163.60657 | 388.87616  | 3 | 8  | 16.8967 | 114.74 |
| 26 | 19.01  | 21.04  | 68.3 PPP1R2_FlexIII  | 96.3 KLHYNEGLNIK                             | Label:13C(6)15N(2)(K)@1; Label:13C(6)15N(2)(K)@11                                       | missed K-L@1       | -0.00748572 | 1343.74573 | 336.9437 | 1343.75317 | 336.945587 | 4 | 11 | 15.3131 | 212.16 |
| 26 | 19.01  | 21.04  | 68.3 PPP1R2_FlexIII  | 96.3 KLHYNEGLNIK                             | Label:13C(6)15N(2)(K)@1; Label:13C(6)15N(2)(K)@11                                       | missed K-L@1       | -0.00748572 | 1343.74573 | 336.9437 | 1343.75317 | 336.945587 | 4 | 11 | 15.3229 | 212.16 |
| 26 | 19.01  | 21.04  | 68.3 PPP1R2_FlexIII  | 96.3 KLHYNEGLNIK                             | Label:13C(6)15N(2)(K)@1; Label:13C(6)15N(2)(K)@11                                       | missed K-L@1       | -0.00785193 | 1343.74536 | 336.9436 | 1343.75317 | 336.945587 | 4 | 11 | 15.379  | 212.16 |
| 26 | 19.01  | 21.04  | 68.3 PPP1R2_FlexIII  | 96.3 LHYNEGLNIK                              | Label:13C(6)15N(2)(K)@10                                                                |                    | -0.00293175 | 1207.64099 | 403.5543 | 1207.64404 | 403.555298 | 3 | 11 | 15.8859 | 212.16 |
| 26 | 19.01  | 21.04  | 68.3 PPP1R2_FlexIII  | 96.3 LHYNEGLNIK                              | Label:13C(6)15N(2)(K)@10                                                                |                    | 0.00109129  | 1207.64502 | 604.8298 | 1207.64404 | 604.829285 | 2 | 11 | 15.9942 | 212.16 |
| 26 | 19.01  | 21.04  | 68.3 PPP1R2_FlexIII  | 96.3 TSTTSSMVASAEQPR                         | Label:13C(6)15N(4)(R)@15                                                                |                    | 0.00107281  | 1561.72925 | 521.5837 | 1561.72815 | 521.583313 | 3 | 11 | 14.2279 | 212.16 |
| 26 | 19.01  | 21.04  | 68.3 PPP1R2_FlexIII  | 96.3 WDEMNLATYHPADKDYGLMK                    | Deamidated(N)@5; Label:13C(6)15N(2)(K)@15; Label:13C(6)15N(2)(K)@21                     | missed K-D@15      | -0.00042712 | 2527.17285 | 632.8005 | 2527.17334 | 632.800659 | 4 | 12 | 18.2654 | 212.16 |
| 28 | 15.45  | 17.52  | 61.8 GEMIN6_FlexIII  | 96.1 NHIPITEQGADPR                           | Label:13C(6)15N(4)(R)@13                                                                |                    | -0.0126999  | 1456.71729 | 486.5797 | 1456.72986 | 486.583893 | 3 | 7  | 28.4618 | 223.55 |
| 28 | 15.45  | 17.52  | 61.8 GEMIN6_FlexIII  | 96.1 NHIPITEQGADPR                           | Label:13C(6)15N(4)(R)@13                                                                |                    | -0.0126999  | 1456.71729 | 486.5797 | 1456.72986 | 486.583893 | 3 | 7  | 28.9666 | 223.55 |
| 28 | 15.45  | 17.52  | 61.8 GEMIN6_FlexIII  | 96.1 TLCVAGVLTIDPPYDPENCSSSNEILSR            | Propionamide(C)@3; Deamidated(N)@18; Propionamide(C)@19; Label:13C(6)15N(4)(R)@29       |                    | 0.0193519   | 3258.58716 | 1087.203 | 3258.56641 | 1087.19605 | 3 | 10 | 20.9671 | 223.55 |
| 28 | 15.45  | 17.52  | 61.8 GEMIN6_FlexIII  | 96.1 VTASEKNEYK                              | Label:13C(6)15N(2)(K)@6; Label:13C(6)15N(2)(K)@10                                       | missed K-N@6       | -0.00971076 | 1183.59583 | 395.5392 | 1183.60559 | 395.54245  | 3 | 8  | 9.0889  | 223.55 |
| 28 | 15.45  | 17.52  | 61.8 GEMIN6_FlexIII  | 96.1 VTASEKNEYK                              | Label:13C(6)15N(2)(K)@6; Label:13C(6)15N(2)(K)@10                                       | missed K-N@6       | -0.00256961 | 1183.60291 | 395.5416 | 1183.60559 | 395.54245  | 3 | 9  | 9.0998  | 223.55 |
| 9  | 43.4   | 45.4   | 53.4 FBXW2_FlexIII   | 96.1 IWPIGR                                  | Label:13C(6)15N(4)(R)@6                                                                 |                    | -0.00019671 | 750.441467 | 376.228  | 750.441589 | 376.228088 | 2 | 6  | 17.6324 | 87.11  |
| 9  | 43.4   | 45.4   | 53.4 FBXW2_FlexIII   | 96.1 IWPIGR                                  | Label:13C(6)15N(4)(R)@6                                                                 |                    | -0.00056293 | 750.441101 | 376.2278 | 750.441589 | 376.228088 | 2 | 6  | 18.1406 | 87.11  |
| 13 | 39.31  | 41.31  | 63.5 CAMK2D_FlexIII  | 96.1 MLTINPAK                                |                                                                                         |                    | -0.00556672 | 886.489075 | 444.2518 | 886.494629 | 444.254578 | 2 | 10 | 16.3888 | 95.6   |

|    |        |        |                      |                                               |                                                                                                                                                      |             |            |          |            |            |   |    |         |        |
|----|--------|--------|----------------------|-----------------------------------------------|------------------------------------------------------------------------------------------------------------------------------------------------------|-------------|------------|----------|------------|------------|---|----|---------|--------|
| 12 | 41.66  | 43.83  | 57.8 CEACAM5_FlexIII | 95.9 AYVCGIQNSVSANR                           | Propionamide(C)@4; Label:13C(6)15N(4)(R)@14                                                                                                          | 0.00014633  | 1561.75464 | 781.8846 | 1561.75464 | 781.884583 | 2 | 10 | 26.6018 | 162.25 |
| 12 | 41.66  | 43.83  | 57.8 CEACAM5_FlexIII | 95.9 LLLTASLLTFWNPTTAK                        | Label:13C(6)15N(2)(K)@18                                                                                                                             | -0.00878475 | 1994.12451 | 998.0695 | 1994.13318 | 998.073853 | 2 | 9  | 26.4546 | 162.25 |
| 14 | 38.32  | 40.36  | 61.0 PPP3CA_FlexIII  | 95.8 YLFLGDYVDR                               | Label:13C(6)15N(4)(R)@10                                                                                                                             | 0.00089017  | 1269.62793 | 635.8212 | 1269.62695 | 635.82074  | 2 | 11 | 18.9723 | 139.34 |
| 18 | 32.93  | 34.93  | 58.8 CSNK1E_FlexIII  | 95.8 TKHPQLHIESK                              | Label:13C(6)15N(2)(K)@2; Label:13C(6)15N(2)(K)@11                                                                                                    | -0.00150783 | 1332.74707 | 445.2563 | 1332.74854 | 445.256775 | 3 | 11 | 13.2104 | 24.43  |
| 12 | 41.66  | 43.83  | 57.8 CEACAM5_FlexIII | 95.8 LTIESTFPNVAEGKEVLLVHNLQHLFGYSWYKGER      | Deamidated(N)@9; Label:13C(6)15N(2)(K)@14; Label:13C(6)15N(2)(K)@34; Label:13C(6)15N(4)(R)@37                                                        | -0.00899364 | 4311.24658 | 1078.819 | 4311.25781 | 1078.82178 | 4 | 13 | 20.3887 | 162.25 |
| 1  | 103.53 | 103.53 | 78.6 DNM1L_FlexIII   | 95.7 RPLILQLVHVSQEDKR                         | Label:13C(6)15N(4)(R)@1; Deamidated(Q)@12; Label:13C(6)15N(2)(K)@15; Label:13C(6)15N(4)(R)@16                                                        | 0.00319778  | 1959.15942 | 654.0604 | 1959.12598 | 654.049255 | 3 | 11 | 17.3279 | 38.55  |
| 14 | 38.32  | 40.36  | 61.0 PPP3CA_FlexIII  | 95.7 EVFDNDGKPR                               | Label:13C(6)15N(2)(K)@8; Label:13C(6)15N(4)(R)@10                                                                                                    | -0.00078587 | 1193.57886 | 597.7967 | 1193.57959 | 597.797058 | 2 | 11 | 14.0874 | 139.34 |
| 14 | 38.32  | 40.36  | 61.0 PPP3CA_FlexIII  | 95.7 YLFLGDYVDR                               | Label:13C(6)15N(4)(R)@10                                                                                                                             | 0.00027981  | 1269.62732 | 635.8209 | 1269.62695 | 635.82074  | 2 | 11 | 18.9368 | 139.34 |
| 14 | 38.32  | 40.36  | 61.0 PPP3CA_FlexIII  | 95.7 YLFLGDYVDR                               | Label:13C(6)15N(4)(R)@10                                                                                                                             | 0.00089017  | 1269.62793 | 635.8212 | 1269.62695 | 635.82074  | 2 | 11 | 18.9647 | 139.34 |
| 14 | 38.32  | 40.36  | 61.0 PPP3CA_FlexIII  | 95.7 YLFLGDYVDR                               | Label:13C(6)15N(4)(R)@10                                                                                                                             | 0.00137845  | 1269.6283  | 635.8214 | 1269.62695 | 635.82074  | 2 | 11 | 18.995  | 139.34 |
| 14 | 38.32  | 40.36  | 61.0 PPP3CA_FlexIII  | 95.7 YLFLGDYVDR                               | Label:13C(6)15N(4)(R)@10                                                                                                                             | 0.00153401  | 1259.62024 | 630.8174 | 1259.61865 | 630.816589 | 2 | 11 | 19.0356 | 139.34 |
| 12 | 41.66  | 43.83  | 57.8 CEACAM5_FlexIII | 95.7 EVLLVHNLQHLFGYSWYK                       | Label:13C(6)15N(2)(K)@20                                                                                                                             | 0.00619647  | 2463.32764 | 616.8392 | 2463.31934 | 616.837158 | 4 | 12 | 19.4997 | 162.25 |
| 12 | 41.66  | 43.83  | 57.8 CEACAM5_FlexIII | 95.7 SDLVNEEATGQFR                            | Label:13C(6)15N(4)(R)@13                                                                                                                             | -0.00615281 | 1474.68665 | 738.3506 | 1474.69275 | 738.353638 | 2 | 7  | 27.6176 | 162.25 |
| 13 | 39.31  | 41.31  | 63.5 CAMK2D_FlexIII  | 95.6 SNKPIHTILNPHVHLVGDDAACIAYIR              | Label:13C(6)15N(2)(K)@3; Deamidated(N)@11; Propionamide(C)@23; Label:13C(6)15N(4)(R)@28                                                              | 0.00332064  | 3169.71558 | 634.9504 | 3169.68262 | 634.943787 | 5 | 12 | 17.5832 | 95.69  |
| 93 | 0.45   | 15.81  | 67.3 CAMK2B_FlexIII  | 95.6 NSKPIHTILNPHVHIGEDAACIAYIR               | Label:13C(6)15N(2)(K)@3; Deamidated(N)@11; Propionamide(C)@23; Label:13C(6)15N(4)(R)@28                                                              | 0.0747642   | 3171.73657 | 793.9414 | 3171.66187 | 793.92273  | 4 | 12 | 17.6388 | 20.90  |
| 44 | 7.38   | 9.59   | 65.8 CEBPG_FlexIII   | 95.6 ISOQNSTPGVNGISVIHTQAHASGLQGVPLVPAGPGGGGK | Deamidated(N)@11; Label:13C(6)15N(2)(K)@41                                                                                                           | 0.00485359  | 3995.07544 | 999.7761 | 3995.07056 | 999.774902 | 4 | 11 | 26.7674 | 79.94  |
| 44 | 7.38   | 9.59   | 65.8 CEBPG_FlexIII   | 95.6 VNQLKEENER                               | Label:13C(6)15N(2)(K)@5; Label:13C(6)15N(4)(R)@10                                                                                                    | -3.24E-05   | 1275.65369 | 426.2252 | 1275.65381 | 426.22522  | 3 | 9  | 10.7995 | 79.94  |
| 44 | 7.38   | 9.59   | 65.8 CEBPG_FlexIII   | 95.6 VNQLKEENER                               | Label:13C(6)15N(2)(K)@5; Label:13C(6)15N(4)(R)@10                                                                                                    | -0.00030702 | 1275.65344 | 426.2251 | 1275.65381 | 426.22522  | 3 | 8  | 11.7288 | 79.94  |
| 1  | 103.53 | 103.53 | 78.6 DNM1L_FlexIII   | 95.6 GVSPEPIHLK                               | Label:13C(6)15N(2)(K)@10                                                                                                                             | 0.00034392  | 1083.61731 | 542.8159 | 1083.61682 | 542.815674 | 2 | 10 | 15.7359 | 38.55  |
| 6  | 55.31  | 57.32  | 3.8 CDCZ2_FlexIII    | 95.5 IFSEVR                                   | Label:13C(6)15N(4)(R)@6                                                                                                                              | -0.00226167 | 759.413269 | 380.7139 | 759.415466 | 380.714996 | 2 | 7  | 15.5874 | 0.76   |
| 13 | 39.31  | 41.31  | 63.5 CAMK2D_FlexIII  | 95.5 MLTINPAKR                                | Label:13C(6)15N(2)(K)@8; Label:13C(6)15N(4)(R)@9                                                                                                     | -0.00337973 | 1060.61499 | 354.5456 | 1060.61816 | 354.546692 | 3 | 10 | 15.5678 | 95.69  |
| 93 | 0.45   | 15.81  | 67.3 CAMK2B_FlexIII  | 95.5 MLTINPAKR                                | Label:13C(6)15N(2)(K)@8; Label:13C(6)15N(4)(R)@9                                                                                                     | -0.00337973 | 1060.61499 | 354.5456 | 1060.61816 | 354.546692 | 3 | 10 | 15.5678 | 20.90  |
| 12 | 41.66  | 43.83  | 57.8 CEACAM5_FlexIII | 95.4 SDLVNEEATGQFR                            | Deamidated(N)@5; Label:13C(6)15N(4)(R)@13                                                                                                            | 0.0271664   | 1475.7041  | 738.8593 | 1475.67676 | 738.845642 | 2 | 11 | 22.7008 | 162.25 |
| 12 | 41.66  | 43.83  | 57.8 CEACAM5_FlexIII | 95.4 SDLVNEEATGQFR                            | Label:13C(6)15N(4)(R)@13                                                                                                                             | -0.00883836 | 1474.68384 | 738.3492 | 1474.69275 | 738.353638 | 2 | 10 | 23.2107 | 162.25 |
| 12 | 41.66  | 43.83  | 57.8 CEACAM5_FlexIII | 95.4 SDLVNEEATGQFR                            | Deamidated(N)@5; Label:13C(6)15N(4)(R)@13                                                                                                            | 0.0271664   | 1475.7041  | 738.8593 | 1475.67676 | 738.845642 | 2 | 9  | 27.0748 | 162.25 |
| 1  | 103.53 | 103.53 | 78.6 DNM1L_FlexIII   | 95.3 GVSPEPIHLK                               | Label:13C(6)15N(2)(K)@10                                                                                                                             | 0.00034392  | 1083.61731 | 542.8159 | 1083.61682 | 542.815674 | 2 | 10 | 15.726  | 38.55  |
| 1  | 103.53 | 103.53 | 78.6 DNM1L_FlexIII   | 95.3 SATLLQITIK                               | Label:13C(6)15N(2)(K)@10                                                                                                                             | -0.00425783 | 1094.67493 | 548.3447 | 1094.67908 | 548.346802 | 2 | 10 | 19.5051 | 38.55  |
| 9  | 43.4   | 45.4   | 53.4 FBXW2_FlexIII   | 95.3 SICLQPR                                  | Propionamide(C)@3; Label:13C(6)15N(4)(R)@7                                                                                                           | -0.00021357 | 896.477478 | 449.246  | 896.477722 | 449.246155 | 2 | 8  | 15.7921 | 87.11  |
| 13 | 39.31  | 41.31  | 63.5 CAMK2D_FlexIII  | 95.3 ITASEALK                                 | Label:13C(6)15N(2)(K)@8                                                                                                                              | -0.00221331 | 839.4823   | 420.7484 | 839.484375 | 420.749481 | 2 | 10 | 15.1462 | 95.69  |
| 13 | 39.31  | 41.31  | 63.5 CAMK2D_FlexIII  | 95.3 SGSPVPIK                                 | Label:13C(6)15N(2)(K)@9                                                                                                                              | -0.00700468 | 892.503845 | 447.2592 | 892.510925 | 447.262756 | 2 | 10 | 15.2097 | 95.69  |
| 13 | 39.31  | 41.31  | 63.5 CAMK2D_FlexIII  | 95.3 STVASMHR                                 | Label:13C(6)15N(4)(R)@9                                                                                                                              | -0.00147937 | 1028.47571 | 515.2451 | 1028.47705 | 515.24585  | 2 | 9  | 26.6383 | 95.69  |
| 93 | 0.45   | 15.81  | 67.3 CAMK2B_FlexIII  | 95.3 STVASMHR                                 | Label:13C(6)15N(4)(R)@9                                                                                                                              | -0.00147937 | 1028.47571 | 515.2451 | 1028.47705 | 515.24585  | 2 | 9  | 26.6383 | 20.90  |
| 5  | 56.01  | 58.01  | 69.8 PDK1_FlexIII    | 95.1 AYPFTLYK                                 | Label:13C(6)15N(2)(K)@8                                                                                                                              | -0.00056409 | 1009.53589 | 505.7752 | 1009.53644 | 505.775482 | 2 | 10 | 17.8326 | 33.22  |
| 8  | 43.77  | 47.77  | 39.1 ODF2_FlexIII    | 95.1 AYPFTLYK                                 | Label:13C(6)15N(2)(K)@8                                                                                                                              | -0.00056409 | 1009.53589 | 505.7752 | 1009.53644 | 505.775482 | 2 | 10 | 17.8326 | 9.70   |
| 18 | 32.93  | 34.93  | 58.8 CSNK1E_FlexIII  | 95.1 DVKPDNFMGLGK                             | Label:13C(6)15N(2)(K)@3; Deamidated(N)@6; Label:13C(6)15N(2)(K)@13                                                                                   | 0.00631556  | 1449.75732 | 484.2597 | 1449.75085 | 484.257568 | 3 | 11 | 18.4326 | 24.43  |
| 18 | 32.93  | 34.93  | 58.8 CSNK1E_FlexIII  | 95.1 THQHIPPYR                                | Label:13C(6)15N(4)(R)@8                                                                                                                              | -0.00295844 | 1060.54114 | 354.521  | 1060.54419 | 354.522003 | 3 | 8  | 12.7801 | 24.43  |
| 13 | 39.31  | 41.31  | 63.5 CAMK2D_FlexIII  | 94.9 SNKPIHTILNPHVHLVGDDAACIAYIR              | Label:13C(6)15N(2)(K)@3; Propionamide(C)@23; Label:13C(6)15N(4)(R)@28                                                                                | 0.0171546   | 3168.71582 | 634.7504 | 3168.69849 | 634.747009 | 5 | 11 | 26.7275 | 95.69  |
| 12 | 41.66  | 43.83  | 57.8 CEACAM5_FlexIII | 94.9 MESPSAPPHR                               | Label:13C(6)15N(4)(R)@10                                                                                                                             | -0.00287429 | 1117.51868 | 373.5135 | 1117.52136 | 373.514404 | 3 | 11 | 13.4345 | 162.25 |
| 14 | 38.32  | 40.36  | 61.0 PPP3CA_FlexIII  | 94.8 AHEAQDGYR                                | Deamidated(Q)@5; Label:13C(6)15N(4)(R)@10                                                                                                            | 0.00721388  | 1127.49426 | 376.8387 | 1127.48706 | 376.836304 | 3 | 8  | 10.0685 | 139.34 |
| 14 | 38.32  | 40.36  | 61.0 PPP3CA_FlexIII  | 94.8 VFSVLREESESVLTLK                         | Label:13C(6)15N(4)(R)@6; Label:13C(6)15N(2)(K)@16                                                                                                    | -0.00019233 | 1853.02625 | 618.6827 | 1853.02649 | 618.6828   | 3 | 11 | 18.565  | 139.34 |
| 14 | 38.32  | 40.36  | 61.0 PPP3CA_FlexIII  | 94.8 VFSVLREESESVLTLK                         | Label:13C(6)15N(4)(R)@6; Label:13C(6)15N(2)(K)@16                                                                                                    | -0.00060691 | 1853.01856 | 618.6801 | 1853.02649 | 618.6828   | 3 | 11 | 26.5901 | 139.34 |
| 10 | 42.4   | 44.59  | 60.6 GPC4_FlexIII    | 94.8 FDEFFKELLENAEK                           | Label:13C(6)15N(2)(K)@6; Deamidated(N)@11; Label:13C(6)15N(2)(K)@14                                                                                  | 0.00384162  | 1774.86743 | 888.441  | 1774.86365 | 888.439087 | 2 | 10 | 19.8284 | 84.97  |
| 14 | 38.32  | 40.36  | 61.0 PPP3CA_FlexIII  | 94.7 TQEHFHTNTR                               | Label:13C(6)15N(4)(R)@11                                                                                                                             | -0.00267441 | 1378.65906 | 460.5603 | 1378.66174 | 460.561188 | 3 | 8  | 12.1409 | 139.34 |
| 14 | 38.32  | 40.36  | 61.0 PPP3CA_FlexIII  | 94.5 HLTIEYTFK                                | Label:13C(6)15N(2)(K)@9                                                                                                                              | -0.00341536 | 1192.59729 | 398.5397 | 1192.60083 | 398.540894 | 3 | 9  | 17.5553 | 139.34 |
| 14 | 38.32  | 40.36  | 61.0 PPP3CA_FlexIII  | 94.5 HLTIEYTFK                                | Label:13C(6)15N(2)(K)@9                                                                                                                              | -0.00341536 | 1192.59729 | 398.5397 | 1192.60083 | 398.540894 | 3 | 9  | 17.568  | 139.34 |
| 14 | 38.32  | 40.36  | 61.0 PPP3CA_FlexIII  | 94.5 TQEHFHTNTR                               | Label:13C(6)15N(4)(R)@11                                                                                                                             | -0.00267441 | 1378.65906 | 460.5603 | 1378.66174 | 460.561188 | 3 | 10 | 12.5979 | 139.34 |
| 14 | 38.32  | 40.36  | 61.0 PPP3CA_FlexIII  | 94.5 TQEHFHTNTR                               | Label:13C(6)15N(4)(R)@11                                                                                                                             | -0.00239975 | 1378.6593  | 460.5604 | 1378.66174 | 460.561188 | 3 | 10 | 13.1141 | 139.34 |
| 1  | 103.53 | 103.53 | 78.6 DNM1L_FlexIII   | 94.4 KYPISLANR                                | Label:13C(6)15N(2)(K)@1; Label:13C(6)15N(4)(R)@8                                                                                                     | -0.00197406 | 965.539246 | 322.8537 | 965.541321 | 322.854401 | 3 | 8  | 14.4212 | 38.55  |
| 1  | 103.53 | 103.53 | 78.6 DNM1L_FlexIII   | 94.4 RPLILQLVHVSQEDKRK                        | Label:13C(6)15N(4)(R)@1; Deamidated(Q)@6; Label:13C(6)15N(2)(K)@15; Label:13C(6)15N(4)(R)@16; Label:13C(6)15N(2)(K)@18; missed K-R@15; missed R-K@16 | 0.014939    | 2095.25024 | 524.8198 | 2095.23511 | 524.81604  | 4 | 11 | 16.8827 | 38.55  |
| 12 | 41.66  | 43.83  | 57.8 CEACAM5_FlexIII | 94.4 MESPSAPPHR                               | Label:13C(6)15N(4)(R)@10                                                                                                                             | -0.00098588 | 1117.52051 | 559.7675 | 1117.52136 | 559.767944 | 2 | 11 | 13.4898 | 162.25 |
| 12 | 41.66  | 43.83  | 57.8 CEACAM5_FlexIII | 94.4 TLTLTSVTR                                | Label:13C(6)15N(4)(R)@9                                                                                                                              | 0.0003507   | 1012.61585 | 507.3152 | 1012.6156  | 507.315094 | 2 | 11 | 18.0913 | 162.25 |
| 5  | 56.01  | 58.01  | 69.8 PDK1_FlexIII    | 94.3 AYPFTLYK                                 | Label:13C(6)15N(2)(K)@8                                                                                                                              | -0.00021872 | 1009.53626 | 505.7754 | 1009.53644 | 505.775482 | 2 | 9  | 17.8294 | 33.22  |
| 8  | 43.77  | 47.77  | 39.1 ODF2_FlexIII    | 94.3 AYPFTLYK                                 | Label:13C(6)15N(2)(K)@8                                                                                                                              | -0.00021872 | 1009.53626 | 505.7754 | 1009.53644 | 505.775482 | 2 | 9  | 17.8294 | 9.70   |
| 12 | 41.66  | 43.83  | 57.8 CEACAM5_FlexIII | 94.2 TLTLFNTR                                 | Label:13C(6)15N(4)(R)@9                                                                                                                              | -0.00089894 | 1073.61011 | 537.8123 | 1073.61084 | 537.812683 | 2 | 11 | 18.389  | 162.25 |
| 28 | 15.45  | 17.52  | 61.8 GEMIN6_FlexIII  | 94.2 AYSPEDELEER                              | Label:13C(6)15N(4)(R)@10                                                                                                                             | 0.00034196  | 1217.54431 | 609.7794 | 1217.54395 | 609.779236 | 2 | 10 | 15.9098 | 223.55 |
| 28 | 15.45  | 17.52  | 61.8 GEMIN6_FlexIII  | 94.2 AYSPEDELEER                              | Label:13C(6)15N(4)(R)@10                                                                                                                             | 0.00021989  | 1217.54431 | 609.7794 | 1217.54395 | 609.779236 | 2 | 10 | 15.9426 | 223.55 |
| 18 | 32.93  | 34.93  | 58.8 CSNK1E_FlexIII  | 94.2 THQHIPPYR                                | Label:13C(6)15N(4)(R)@8                                                                                                                              | -0.00295844 | 1060.54114 | 354.521  | 1060.54419 | 354.522003 | 3 | 8  | 12.7902 | 24.43  |
| 1  | 103.53 | 103.53 | 78.6 DNM1L_FlexIII   | 93.9 CYVELHEEMOR                              | Propionamide(C)@1; Label:13C(6)15N(4)(R)@11                                                                                                          | 0.00040581  | 1452.67322 | 485.2317 | 1452.67285 | 485.231567 | 3 | 10 | 15.7086 | 38.55  |
| 1  | 103.53 | 103.53 | 78.6 DNM1L_FlexIII   | 93.9 ICYIFHETFGR                              | Propionamide(C)@2; Label:13C(6)15N(4)(R)@11                                                                                                          | -0.00094146 | 1465.70398 | 489.5753 | 1465.7052  | 489.575653 | 3 | 10 | 17.6753 | 38.55  |
| 1  | 103.53 | 103.53 | 78.6 DNM1L_FlexIII   | 93.9 ICYIFHETFGR                              | Propionamide(C)@2; Label:13C(6)15N(4)(R)@11                                                                                                          | -0.00130767 | 1465.70374 | 489.5752 | 1465.7052  | 489.575653 | 3 | 10 | 17.7182 | 38.55  |
| 24 | 19.83  | 21.83  | 48.3 FOS_FlexIII     | 93.9 LEFILAHRPACK                             | Label:13C(6)15N(4)(R)@9; Propionamide(C)@12; Label:13                                                                                                |             |            |          |            |            |   |    |         |        |

|    |        |        |      |                |      |                                         |                                                                       |             |            |          |            |            |   |    |         |        |
|----|--------|--------|------|----------------|------|-----------------------------------------|-----------------------------------------------------------------------|-------------|------------|----------|------------|------------|---|----|---------|--------|
| 19 | 28     | 30     | 42.2 | FKBP3_FlexII   | 93.5 | AWTVEQLR                                | Label:13C(6)15N(4)(R)@8                                               | -0.00019352 | 1011.53748 | 506.776  | 1011.53772 | 506.776123 | 2 | 9  | 17.3538 | 106.31 |
| 14 | 38.32  | 40.36  | 61.0 | PPP3CA_FlexII  | 93.4 | AHEAQDAQYR                              | Deamidated(Q)@5; Label:13C(6)15N(4)(R)@10                             | 0.00721388  | 1127.49426 | 376.8387 | 1127.48706 | 376.836304 | 3 | 8  | 8.8941  | 139.34 |
| 14 | 38.32  | 40.36  | 61.0 | PPP3CA_FlexII  | 93.4 | AHEAQDAQYR                              | Label:13C(6)15N(4)(R)@10                                              | 0.00193485  | 1126.50513 | 564.2598 | 1126.50305 | 564.25885  | 2 | 6  | 8.922   | 139.34 |
| 14 | 38.32  | 40.36  | 61.0 | PPP3CA_FlexII  | 93.4 | TQEHFHTNTVR                             | Label:13C(6)15N(4)(R)@11                                              | -0.00175888 | 1378.66003 | 460.5606 | 1378.66174 | 460.561188 | 3 | 8  | 12.0921 | 139.34 |
| 14 | 38.32  | 40.36  | 61.0 | PPP3CA_FlexII  | 93.4 | TQEHFHTNTVR                             | Label:13C(6)15N(4)(R)@11                                              | -0.00239975 | 1378.6593  | 460.5604 | 1378.66174 | 460.561188 | 3 | 10 | 12.6283 | 139.34 |
| 9  | 43.4   | 45.4   | 53.4 | FBXW2_FlexII   | 93.4 | IWPIGR                                  | Label:13C(6)15N(4)(R)@6                                               | -0.00080707 | 750.440857 | 376.2277 | 750.441589 | 376.228088 | 2 | 6  | 18.1709 | 87.11  |
| 9  | 43.4   | 45.4   | 53.4 | FBXW2_FlexII   | 93.4 | SICLQPR                                 | Propionamide(C)@3; Label:13C(6)15N(4)(R)@7                            | -0.00021357 | 896.477478 | 449.246  | 896.477722 | 449.246155 | 2 | 8  | 15.8046 | 87.11  |
| 9  | 43.4   | 45.4   | 53.4 | FBXW2_FlexII   | 93.4 | WLPPEYR                                 | Label:13C(6)15N(4)(R)@7                                               | 1.81E-05    | 969.494873 | 485.7547 | 969.494751 | 485.754669 | 2 | 8  | 17.8772 | 87.11  |
| 28 | 15.45  | 17.52  | 61.8 | GEMIN6_FlexII  | 93.3 | AYSPEDELEERK                            | Label:13C(6)15N(4)(R)@10; Label:13C(6)15N(2)(K)@11                    | 0.0135423   | 1353.66663 | 677.8406 | 1353.65308 | 677.833862 | 2 | 10 | 15.2454 | 223.55 |
| 28 | 15.45  | 17.52  | 61.8 | GEMIN6_FlexII  | 92.9 | AYSPEDELEERK                            | Label:13C(6)15N(4)(R)@10; Label:13C(6)15N(2)(K)@11                    | 0.00365452  | 1353.65686 | 677.8357 | 1353.65308 | 677.833862 | 2 | 10 | 15.2878 | 223.55 |
| 28 | 15.45  | 17.52  | 61.8 | GEMIN6_FlexII  | 92.9 | VTASEKNEYK                              | Label:13C(6)15N(2)(K)@6; Label:13C(6)15N(2)(K)@10                     | -0.00971076 | 1183.59583 | 395.5392 | 1183.60559 | 395.54245  | 3 | 7  | 10.9359 | 223.55 |
| 19 | 28     | 30     | 42.2 | FKBP3_FlexII   | 92.9 | AWTVEQLR                                | Label:13C(6)15N(4)(R)@8                                               | -0.00019352 | 1011.53748 | 506.776  | 1011.53772 | 506.776123 | 2 | 9  | 17.3513 | 106.31 |
| 19 | 28     | 30     | 42.2 | FKBP3_FlexII   | 92.9 | AWTVEQLR                                | Label:13C(6)15N(4)(R)@8                                               | 0.00017269  | 1011.5379  | 506.7762 | 1011.53772 | 506.776123 | 2 | 9  | 17.3816 | 106.31 |
| 17 | 36     | 38     | 65.3 | TOB1_FlexII    | 92.8 | NSFNPEAQVFMISDPASSVSSSPSPFPGHSAAVSPTFMR | Deamidated(Q)@8; Label:13C(6)15N(4)(R)@41                             | -0.00213451 | 4271.97852 | 1069.002 | 4271.98096 | 1069.00244 | 4 | 12 | 19.1797 | 84.84  |
| 12 | 41.66  | 43.83  | 57.8 | CEACAM5_FlexII | 92.8 | CETONPVSAR                              | Propionamide(C)@1; Label:13C(6)15N(4)(R)@10                           | -4.09E-05   | 1184.54822 | 593.2814 | 1184.54834 | 593.281433 | 2 | 11 | 13.8249 | 162.25 |
| 12 | 41.66  | 43.83  | 57.8 | CEACAM5_FlexII | 92.8 | LLLTASLLTFWNPPTTAK                      | Label:13C(6)15N(2)(K)@18                                              | -0.00341365 | 1994.12964 | 998.0721 | 1994.13318 | 998.073853 | 2 | 10 | 26.4965 | 162.25 |
| 7  | 54.8   | 57     | 71.4 | POLR3D_FlexII  | 92.6 | KTFTPMNIIR                              | Label:13C(6)15N(2)(K)@1; Label:13C(6)15N(4)(R)@10                     | -0.0102138  | 1193.67847 | 398.9001 | 1193.68872 | 398.903503 | 3 | 9  | 16.1865 | 77.94  |
| 14 | 38.32  | 40.36  | 61.0 | PPP3CA_FlexII  | 92.4 | EESSEVLTLK                              | Label:13C(6)15N(2)(K)@10                                              | 0.00089369  | 1141.59668 | 571.8056 | 1141.59583 | 571.805176 | 2 | 10 | 16.888  | 139.34 |
| 10 | 42.4   | 44.59  | 60.6 | GPC4_FlexII    | 92.3 | MYCSHCR                                 | Propionamide(C)@4; Propionamide(C)@7; Label:13C(6)15N(4)(R)@8         | 0.00035577  | 1163.4917  | 582.7531 | 1163.49133 | 582.75293  | 2 | 9  | 14.0874 | 84.97  |
| 10 | 42.4   | 44.59  | 60.6 | GPC4_FlexII    | 92.3 | MYCSHCR                                 | Propionamide(C)@4; Propionamide(C)@7; Label:13C(6)15N(4)(R)@8         | 0.0010882   | 1163.49243 | 582.7535 | 1163.49133 | 582.75293  | 2 | 9  | 14.1579 | 84.97  |
| 12 | 41.66  | 43.83  | 57.8 | CEACAM5_FlexII | 92.3 | EIYPNASLIQNIIONDTGFYTLHVIK              | Deamidated(N)@17; Label:13C(6)15N(2)(K)@28                            | 0.00978767  | 3238.74512 | 1080.589 | 3238.73682 | 1080.5863  | 3 | 10 | 20.9542 | 162.25 |
| 12 | 41.66  | 43.83  | 57.8 | CEACAM5_FlexII | 92.3 | LLLTASLLTFWNPPTTAK                      | Label:13C(6)15N(2)(K)@18                                              | 0.00247993  | 1994.13574 | 665.7192 | 1994.13318 | 665.718323 | 3 | 10 | 26.5125 | 162.25 |
| 12 | 41.66  | 43.83  | 57.8 | CEACAM5_FlexII | 92.3 | LTIESTPPNVAEGK                          | Label:13C(6)15N(2)(K)@14                                              | 0.0124208   | 1512.80383 | 757.4092 | 1512.7915  | 757.403015 | 2 | 9  | 26.4889 | 162.25 |
| 12 | 41.66  | 43.83  | 57.8 | CEACAM5_FlexII | 92.3 | TLTLFNVTR                               | Label:13C(6)15N(4)(R)@9                                               | -0.00565059 | 1073.60523 | 537.8099 | 1073.61084 | 537.812683 | 2 | 10 | 19.02   | 162.25 |
| 12 | 41.66  | 43.83  | 57.8 | CEACAM5_FlexII | 92.3 | TLTLLSVTR                               | Label:13C(6)15N(4)(R)@9                                               | -0.00044276 | 1012.61505 | 507.3148 | 1012.6156  | 507.315094 | 2 | 10 | 18.1893 | 162.25 |
| 14 | 38.32  | 40.36  | 61.0 | PPP3CA_FlexII  | 92.1 | EESSEVLTLK                              | Label:13C(6)15N(2)(K)@10                                              | 0.00089369  | 1141.59668 | 571.8056 | 1141.59583 | 571.805176 | 2 | 10 | 16.8929 | 139.34 |
| 1  | 103.53 | 103.53 | 78.6 | DNM1L_FlexII   | 92.0 | SVYDSIRDEYAFLOK                         | Label:13C(6)15N(4)(R)@7; Label:13C(6)15N(2)(K)@15                     | 0.00093358  | 1188.9021  | 597.308  | 1188.90125 | 597.307678 | 3 | 10 | 17.9429 | 38.55  |
| 12 | 41.66  | 43.83  | 57.8 | CEACAM5_FlexII | 91.8 | SDLVNEEATGQFR                           | Deamidated(N)@5; Label:13C(6)15N(4)(R)@13                             | 0.0071469   | 1475.88384 | 738.8492 | 1475.67676 | 738.845642 | 2 | 9  | 23.6626 | 162.25 |
| 12 | 41.66  | 43.83  | 57.8 | CEACAM5_FlexII | 91.8 | TLTLFNVTR                               | Label:13C(6)15N(4)(R)@9                                               | -0.00723751 | 1073.60364 | 537.8091 | 1073.61084 | 537.812683 | 2 | 10 | 18.9059 | 162.25 |
| 14 | 38.32  | 40.36  | 61.0 | PPP3CA_FlexII  | 91.6 | EESSEVLTLK                              | Label:13C(6)15N(2)(K)@10                                              | 0.00089369  | 1141.59668 | 571.8056 | 1141.59583 | 571.805176 | 2 | 10 | 16.8904 | 139.34 |
| 14 | 38.32  | 40.36  | 61.0 | PPP3CA_FlexII  | 91.6 | YLFGLDYVDR                              | Label:13C(6)15N(4)(R)@10                                              | -0.00533545 | 1269.6217  | 635.8181 | 1269.62695 | 635.82074  | 2 | 10 | 19.0811 | 139.34 |
| 44 | 7.38   | 9.59   | 65.8 | CEBPQ_FlexII   | 91.5 | VNQLKEENER                              | Deamidated(Q)@3; Label:13C(6)15N(2)(K)@5; Label:13C(6)15N(4)(R)@10    | 0.0023767   | 1276.6582  | 426.56   | 1276.63782 | 426.553223 | 3 | 8  | 11.6984 | 79.94  |
| 13 | 39.31  | 41.31  | 63.5 | CAMK2D_FlexII  | 91.5 | MLTINPAKR                               | Label:13C(6)15N(2)(K)@8; Label:13C(6)15N(4)(R)@9                      | -0.00337973 | 1060.61499 | 354.5456 | 1060.61816 | 354.546692 | 3 | 9  | 15.5779 | 95.69  |
| 13 | 39.31  | 41.31  | 63.5 | CAMK2D_FlexII  | 91.5 | MLTINPAKR                               | Label:13C(6)15N(2)(K)@8; Label:13C(6)15N(4)(R)@9                      | -0.00365439 | 1060.61462 | 354.5455 | 1060.61816 | 354.546692 | 3 | 9  | 15.6482 | 95.69  |
| 93 | 0.45   | 15.81  | 67.3 | CAMK2B_FlexII  | 91.5 | MLTINPAKR                               | Label:13C(6)15N(2)(K)@8; Label:13C(6)15N(4)(R)@9                      | -0.00337973 | 1060.61499 | 354.5456 | 1060.61816 | 354.546692 | 3 | 9  | 15.5779 | 20.90  |
| 93 | 0.45   | 15.81  | 67.3 | CAMK2B_FlexII  | 91.5 | MLTINPAKR                               | Label:13C(6)15N(2)(K)@8; Label:13C(6)15N(4)(R)@9                      | -0.00365439 | 1060.61462 | 354.5455 | 1060.61816 | 354.546692 | 3 | 9  | 15.6482 | 20.90  |
| 53 | 4.63   | 6.81   | 20.1 | MYADM_FlexII   | 91.3 | SHAYYYCAWDRR                            | Propionamide(C)@7; Label:13C(6)15N(4)(R)@11; Label:13C(6)15N(4)(R)@12 | 0.00073535  | 1616.74292 | 539.9216 | 1616.74207 | 539.921326 | 3 | 10 | 15.9263 | 29.53  |
| 12 | 41.66  | 43.83  | 57.8 | CEACAM5_FlexII | 91.3 | MESPSAPPHR                              | Label:13C(6)15N(4)(R)@10                                              | -0.00088588 | 1117.52051 | 559.7675 | 1117.52136 | 559.767944 | 2 | 10 | 13.4873 | 162.25 |
| 12 | 41.66  | 43.83  | 57.8 | CEACAM5_FlexII | 91.3 | SDLVNEEATGQFR                           | Label:13C(6)15N(4)(R)@13                                              | -0.00615281 | 1474.68665 | 738.3506 | 1474.69275 | 738.353638 | 2 | 6  | 27.615  | 162.25 |
| 12 | 41.66  | 43.83  | 57.8 | CEACAM5_FlexII | 91.3 | TLTLFNVTR                               | Label:13C(6)15N(4)(R)@9                                               | -0.00088984 | 1073.61011 | 537.8123 | 1073.61084 | 537.812683 | 2 | 10 | 18.3913 | 162.25 |
| 12 | 41.66  | 43.83  | 57.8 | CEACAM5_FlexII | 91.3 | TLTLFNVTR                               | Label:13C(6)15N(4)(R)@9                                               | -0.0006457  | 1073.61023 | 537.8124 | 1073.61084 | 537.812683 | 2 | 10 | 18.424  | 162.25 |
| 14 | 38.32  | 40.36  | 61.0 | PPP3CA_FlexII  | 90.8 | TLFLLR                                  | Label:13C(6)15N(4)(R)@6                                               | -0.00741784 | 771.480896 | 386.7477 | 771.48822  | 386.751404 | 2 | 6  | 19.2029 | 139.34 |
| 12 | 41.66  | 43.83  | 57.8 | CEACAM5_FlexII | 90.8 | CETONPVSAR                              | Propionamide(C)@1; Label:13C(6)15N(4)(R)@10                           | -4.09E-05   | 1184.54822 | 593.2814 | 1184.54834 | 593.281433 | 2 | 10 | 13.8552 | 162.25 |
| 9  | 43.4   | 45.4   | 53.4 | FBXW2_FlexII   | 90.7 | VYALYYK                                 | Label:13C(6)15N(2)(K)@7                                               | 0.00046044  | 926.499878 | 464.2572 | 926.499329 | 464.256928 | 2 | 8  | 16.8837 | 87.11  |
| 28 | 15.45  | 17.52  | 61.8 | GEMIN6_FlexII  | 90.5 | NHIPTEQQGDAPR                           | Label:13C(6)15N(4)(R)@13                                              | -0.00270464 | 1456.72705 | 729.3708 | 1456.72986 | 729.372192 | 2 | 8  | 26.6575 | 223.55 |
| 1  | 103.53 | 103.53 | 78.6 | DNM1L_FlexII   | 90.5 | YPTFLYK                                 | Label:13C(6)15N(2)(K)@7                                               | -0.00070251 | 938.498657 | 470.2566 | 938.499329 | 470.256928 | 2 | 9  | 17.8377 | 38.55  |
| 2  | 66.08  | 68.08  | 40.2 | RPS6KA1_FlexII | 90.5 | YPTFLYK                                 | Label:13C(6)15N(2)(K)@7                                               | -0.00070251 | 938.498657 | 470.2566 | 938.499329 | 470.256928 | 2 | 9  | 17.8377 | 114.74 |
| 3  | 60.89  | 62.89  | 59.3 | BTRC_FlexII    | 90.5 | YPTFLYK                                 | Label:13C(6)15N(2)(K)@7                                               | -0.00070251 | 938.498657 | 470.2566 | 938.499329 | 470.256928 | 2 | 9  | 17.8377 | 41.90  |
| 4  | 58.58  | 60.58  | 70.0 | NET1_FlexII    | 90.5 | YPTFLYK                                 | Label:13C(6)15N(2)(K)@7                                               | -0.00070251 | 938.498657 | 470.2566 | 938.499329 | 470.256928 | 2 | 9  | 17.8377 | 4.38   |
| 5  | 56.01  | 58.01  | 69.8 | PDK1_FlexII    | 90.5 | YPTFLYK                                 | Label:13C(6)15N(2)(K)@7                                               | -0.00070251 | 938.498657 | 470.2566 | 938.499329 | 470.256928 | 2 | 9  | 17.8377 | 33.22  |
| 6  | 55.31  | 57.32  | 3.8  | CDC27_FlexII   | 90.5 | YPTFLYK                                 | Label:13C(6)15N(2)(K)@7                                               | -0.00070251 | 938.498657 | 470.2566 | 938.499329 | 470.256928 | 2 | 9  | 17.8377 | 0.76   |
| 7  | 54.8   | 57     | 71.4 | POLR3D_FlexII  | 90.5 | YPTFLYK                                 | Label:13C(6)15N(2)(K)@7                                               | -0.00070251 | 938.498657 | 470.2566 | 938.499329 | 470.256928 | 2 | 9  | 17.8377 | 77.94  |
| 8  | 43.77  | 47.77  | 39.1 | ODF2_FlexII    | 90.5 | YPTFLYK                                 | Label:13C(6)15N(2)(K)@7                                               | -0.00070251 | 938.498657 | 470.2566 | 938.499329 | 470.256928 | 2 | 9  | 17.8377 | 9.70   |
| 9  | 43.4   | 45.4   | 53.4 | FBXW2_FlexII   | 90.5 | YPTFLYK                                 | Label:13C(6)15N(2)(K)@7                                               | -0.00070251 | 938.498657 | 470.2566 | 938.499329 | 470.256928 | 2 | 9  | 17.8377 | 87.11  |
| 10 | 42.4   | 44.59  | 60.6 | GPC4_FlexII    | 90.5 | YPTFLYK                                 | Label:13C(6)15N(2)(K)@7                                               | -0.00070251 | 938.498657 | 470.2566 | 938.499329 | 470.256928 | 2 | 9  | 17.8377 | 84.97  |
| 11 | 42     | 44     | 63.3 | EFEMP1_FlexII  | 90.5 | YPTFLYK                                 | Label:13C(6)15N(2)(K)@7                                               | -0.00070251 | 938.498657 | 470.2566 | 938.499329 | 470.256928 | 2 | 9  | 17.8377 | 50.15  |
| 12 | 41.66  | 43.83  | 57.8 | CEACAM5_FlexII | 90.5 | YPTFLYK                                 | Label:13C(6)15N(2)(K)@7                                               | -0.00070251 | 938.498657 | 470.2566 | 938.499329 | 470.256928 | 2 | 9  | 17.8377 | 162.25 |
| 13 | 39.31  | 41.31  | 63.5 | CAMK2D_FlexII  | 90.5 | YPTFLYK                                 | Label:13C(6)15N(2)(K)@7                                               | -0.00070251 | 938.498657 | 470.2566 | 938.499329 | 470.256928 | 2 | 9  | 17.8377 | 95.69  |
| 14 | 38.32  | 40.36  | 61.0 | PPP3CA_FlexII  | 90.5 | YPTFLYK                                 | Label:13C(6)15N(2)(K)@7                                               | -0.00070251 | 938.498657 | 470.2566 | 938.499329 | 470.256928 | 2 | 9  | 17.8377 | 139.34 |
| 16 | 36.84  | 38.92  | 46.6 | C3ORD37_FlexII | 90.5 | YPTFLYK                                 | Label:13C(6)15N(2)(K)@7                                               | -0.00070251 | 938.498657 | 470.2566 | 938.4993   |            |   |    |         |        |

|    |        |        |      |                 |      |                                      |                                                                                 |                              |             |            |          |            |            |   |     |         |        |
|----|--------|--------|------|-----------------|------|--------------------------------------|---------------------------------------------------------------------------------|------------------------------|-------------|------------|----------|------------|------------|---|-----|---------|--------|
| 44 | 7.38   | 9.59   | 65.8 | CEBPG_FlexIII   | 90.5 | YPTFLYK                              | Label: 13C(6)15N(2)(K)@7                                                        | cleaved Q-Y@N-term           | -0.00070251 | 938.498657 | 470.2566 | 938.499329 | 470.256928 | 2 | 9   | 17.8377 | 79.94  |
| 53 | 4.63   | 6.81   | 20.1 | MYADM_FlexIII   | 90.5 | YPTFLYK                              | Label: 13C(6)15N(2)(K)@7                                                        | cleaved V-Y@N-term           | -0.00070251 | 938.498657 | 470.2566 | 938.499329 | 470.256928 | 2 | 9   | 17.8377 | 29.53  |
| 65 | 2      | 4      | 59.6 | LIMS1_FlexIII   | 90.5 | YPTFLYK                              | Label: 13C(6)15N(2)(K)@7                                                        |                              | -0.00070251 | 938.498657 | 470.2566 | 938.499329 | 470.256928 | 2 | 9   | 17.8377 | 4.68   |
| 93 | 0.45   | 15.81  | 67.3 | CAMK2B_FlexIII  | 90.5 | YPTFLYK                              | Label: 13C(6)15N(2)(K)@7                                                        | cleaved Q-Y@N-term           | -0.00070251 | 938.498657 | 470.2566 | 938.499329 | 470.256928 | 2 | 9   | 17.8377 | 20.90  |
| 1  | 103.53 | 103.53 | 78.6 | DNM1L_FlexIII   | 90.0 | ELPSAVSR                             | Label: 13C(6)15N(4)(R)@8                                                        |                              | -0.00067996 | 867.468262 | 434.7414 | 867.468933 | 434.74176  | 2 | 9   | 14.956  | 38.55  |
| 18 | 32.93  | 34.93  | 58.8 | CSNK1E_FlexIII  | 89.6 | TKHPVHIESK                           | Label: 13C(6)15N(2)(K)@2; Label: 13C(6)15N(2)(K)@11                             | missed K-H@2                 | -0.00123317 | 1332.74707 | 445.2563 | 1332.74854 | 445.256775 | 3 | 10  | 13.2659 | 24.43  |
| 12 | 41.66  | 43.83  | 57.8 | CEACAM5_FlexIII | 89.6 | EVLLLVHNLQHLFGYSWYK                  | Deamidated(N)@8; Label: 13C(6)15N(2)(K)@20                                      |                              | -0.0158574  | 2464.28784 | 617.0792 | 2464.30347 | 617.08313  | 4 | 11  | 19.5022 | 162.25 |
| 12 | 41.66  | 43.83  | 57.8 | CEACAM5_FlexIII | 89.6 | LTIESTPPNVAEGK                       | Label: 13C(6)15N(2)(K)@14                                                       |                              | 0.00045785  | 1512.79211 | 757.4033 | 1512.7915  | 757.403015 | 2 | 10  | 17.9731 | 162.25 |
| 12 | 41.66  | 43.83  | 57.8 | CEACAM5_FlexIII | 89.6 | LTIESTPPNVAEGKEVLLLVHNLQHLFGYSWYKGER | Label: 13C(6)15N(2)(K)@14; Label: 13C(6)15N(2)(K)@34; Label: 13C(6)15N(4)(R)@37 | missed K-E@14; missed K-G@34 | -0.0420003  | 4310.23193 | 719.3793 | 4310.27393 | 719.386231 | 6 | 11  | 20.3734 | 162.25 |
| 12 | 41.66  | 43.83  | 57.8 | CEACAM5_FlexIII | 89.6 | SDLVNEATGQFR                         | Label: 13C(6)15N(4)(R)@13                                                       |                              | 0.00043899  | 1474.69324 | 738.3539 | 1474.69275 | 738.353638 | 2 | 7   | 27.0985 | 162.25 |
| 12 | 41.66  | 43.83  | 57.8 | CEACAM5_FlexIII | 89.6 | TLTLFNVTR                            | Label: 13C(6)15N(4)(R)@9                                                        |                              | -0.00723751 | 1073.60364 | 537.8091 | 1073.61084 | 537.812683 | 2 | 8   | 27.0934 | 162.25 |
| 24 | 19.83  | 21.83  | 48.3 | FOS_FlexIII     | 89.6 | LEFILAHRPACK                         | Label: 13C(6)15N(4)(R)@9; Propionamide(C)@12; Label: 13C(6)15N(2)(K)@13         |                              | -0.00175229 | 1556.85974 | 390.2222 | 1556.86157 | 390.222687 | 4 | 10  | 16.6208 | 136.39 |
| 24 | 19.83  | 21.83  | 48.3 | FOS_FlexIII     | 89.6 | LEFILAHRPACK                         | Label: 13C(6)15N(4)(R)@9; Propionamide(C)@12; Label: 13C(6)15N(2)(K)@13         |                              | -0.00260679 | 1556.85889 | 390.222  | 1556.86157 | 390.222687 | 4 | 10  | 16.6381 | 136.39 |
| 24 | 19.83  | 21.83  | 48.3 | FOS_FlexIII     | 89.6 | VEQLSPREEEKRR                        | Label: 13C(6)15N(2)(K)@11; Label: 13C(6)15N(4)(R)@12; Label: 13C(6)15N(4)(R)@13 | missed K-R@11; missed R-R@12 | 0.0110386   | 1655.8584  | 552.9601 | 1655.84729 | 552.95636  | 3 | 10  | 13.9455 | 136.39 |
| 14 | 38.32  | 40.36  | 61.0 | PPP3CA_FlexIII  | 89.3 | TQEHFHTNTR                           | Label: 13C(6)15N(4)(R)@11                                                       |                              | -0.00267441 | 1378.65906 | 460.5603 | 1378.66174 | 460.561188 | 3 | 10  | 13.1925 | 139.34 |
| 13 | 39.31  | 41.31  | 63.5 | CAMK2D_FlexIII  | 89.0 | GAFSVVR                              | Label: 13C(6)15N(4)(R)@7                                                        |                              | -0.00239925 | 744.413452 | 373.214  | 744.415772 | 373.215179 | 2 | 8   | 16.2813 | 95.69  |
| 93 | 0.45   | 15.81  | 67.3 | CAMK2B_FlexIII  | 89.0 | GAFSVVR                              | Label: 13C(6)15N(4)(R)@7                                                        |                              | -0.00239925 | 744.413452 | 373.214  | 744.415772 | 373.215179 | 2 | 8   | 16.2813 | 20.90  |
| 1  | 103.53 | 103.53 | 78.6 | DNM1L_FlexIII   | 88.6 | YPTFLYK                              | Label: 13C(6)15N(2)(K)@7                                                        | cleaved W-Y@N-term           | -0.00112976 | 938.498291 | 470.2564 | 938.499329 | 470.256928 | 2 | 9   | 17.7393 | 38.55  |
| 2  | 66.08  | 68.08  | 40.2 | RPS6KA1_FlexIII | 88.6 | YPTFLYK                              | Label: 13C(6)15N(2)(K)@7                                                        | cleaved L-Y@N-term           | -0.00112976 | 938.498291 | 470.2564 | 938.499329 | 470.256928 | 2 | 9   | 17.7393 | 114.74 |
| 3  | 60.89  | 62.89  | 59.3 | BTRC_FlexIII    | 88.6 | YPTFLYK                              | Label: 13C(6)15N(2)(K)@7                                                        |                              | -0.00112976 | 938.498291 | 470.2564 | 938.499329 | 470.256928 | 2 | 9   | 17.7393 | 41.90  |
| 4  | 58.58  | 60.58  | 70.0 | NET1_FlexIII    | 88.6 | YPTFLYK                              | Label: 13C(6)15N(2)(K)@7                                                        | cleaved V-Y@N-term           | -0.00112976 | 938.498291 | 470.2564 | 938.499329 | 470.256928 | 2 | 9   | 17.7393 | 4.38   |
| 5  | 56.01  | 58.01  | 69.8 | PKD1_FlexIII    | 88.6 | YPTFLYK                              | Label: 13C(6)15N(2)(K)@7                                                        | cleaved A-Y@N-term           | -0.00112976 | 938.498291 | 470.2564 | 938.499329 | 470.256928 | 2 | 9   | 17.7393 | 33.22  |
| 6  | 55.31  | 57.32  | 3.8  | CDC27_FlexIII   | 88.6 | YPTFLYK                              | Label: 13C(6)15N(2)(K)@7                                                        | cleaved F-Y@N-term           | -0.00112976 | 938.498291 | 470.2564 | 938.499329 | 470.256928 | 2 | 9   | 17.7393 | 0.76   |
| 7  | 54.8   | 57     | 71.4 | POLR3D_FlexIII  | 88.6 | YPTFLYK                              | Label: 13C(6)15N(2)(K)@7                                                        |                              | -0.00112976 | 938.498291 | 470.2564 | 938.499329 | 470.256928 | 2 | 9   | 17.7393 | 77.94  |
| 8  | 43.77  | 47.77  | 39.1 | ODF2_FlexIII    | 88.6 | YPTFLYK                              | Label: 13C(6)15N(2)(K)@7                                                        | cleaved A-Y@N-term           | -0.00112976 | 938.498291 | 470.2564 | 938.499329 | 470.256928 | 2 | 9   | 17.7393 | 9.70   |
| 9  | 43.4   | 45.4   | 53.4 | FBXW2_FlexIII   | 88.6 | YPTFLYK                              | Label: 13C(6)15N(2)(K)@7                                                        | cleaved G-Y@N-term           | -0.00112976 | 938.498291 | 470.2564 | 938.499329 | 470.256928 | 2 | 9   | 17.7393 | 87.11  |
| 10 | 42.4   | 44.59  | 60.6 | GPC4_FlexIII    | 88.6 | YPTFLYK                              | Label: 13C(6)15N(2)(K)@7                                                        |                              | -0.00112976 | 938.498291 | 470.2564 | 938.499329 | 470.256928 | 2 | 9   | 17.7393 | 84.97  |
| 11 | 42     | 44     | 63.3 | EFEMP1_FlexIII  | 88.6 | YPTFLYK                              | Label: 13C(6)15N(2)(K)@7                                                        | cleaved F-Y@N-term           | -0.00112976 | 938.498291 | 470.2564 | 938.499329 | 470.256928 | 2 | 9   | 17.7393 | 50.15  |
| 12 | 41.66  | 43.83  | 57.8 | CEACAM5_FlexIII | 88.6 | YPTFLYK                              | Label: 13C(6)15N(2)(K)@7                                                        | cleaved L-Y@N-term           | -0.00112976 | 938.498291 | 470.2564 | 938.499329 | 470.256928 | 2 | 9   | 17.7393 | 162.25 |
| 13 | 39.31  | 41.31  | 63.5 | CAMK2D_FlexIII  | 88.6 | YPTFLYK                              | Label: 13C(6)15N(2)(K)@7                                                        |                              | -0.00112976 | 938.498291 | 470.2564 | 938.499329 | 470.256928 | 2 | 9   | 17.7393 | 95.69  |
| 14 | 38.32  | 40.36  | 61.0 | PPP3CA_FlexIII  | 88.6 | YPTFLYK                              | Label: 13C(6)15N(2)(K)@7                                                        | cleaved Q-Y@N-term           | -0.00112976 | 938.498291 | 470.2564 | 938.499329 | 470.256928 | 2 | 9   | 17.7393 | 139.34 |
| 16 | 36.84  | 38.92  | 46.6 | C3ORD37_FlexIII | 88.6 | YPTFLYK                              | Label: 13C(6)15N(2)(K)@7                                                        | cleaved Q-Y@N-term           | -0.00112976 | 938.498291 | 470.2564 | 938.499329 | 470.256928 | 2 | 9   | 17.7393 | 50.01  |
| 17 | 36     | 38     | 65.3 | TOB1_FlexIII    | 88.6 | YPTFLYK                              | Label: 13C(6)15N(2)(K)@7                                                        | cleaved N-Y@N-term           | -0.00112976 | 938.498291 | 470.2564 | 938.499329 | 470.256928 | 2 | 9   | 17.7393 | 84.84  |
| 18 | 32.93  | 34.93  | 58.8 | CSNK1E_FlexIII  | 88.6 | YPTFLYK                              | Label: 13C(6)15N(2)(K)@7                                                        |                              | -0.00112976 | 938.498291 | 470.2564 | 938.499329 | 470.256928 | 2 | 9   | 17.7393 | 24.43  |
| 19 | 28     | 30     | 42.2 | FKBP3_FlexIII   | 88.6 | YPTFLYK                              | Label: 13C(6)15N(2)(K)@7                                                        | cleaved D-Y@N-term           | -0.00112976 | 938.498291 | 470.2564 | 938.499329 | 470.256928 | 2 | 9   | 17.7393 | 106.31 |
| 24 | 19.83  | 21.83  | 48.3 | FOS_FlexIII     | 88.6 | YPTFLYK                              | Label: 13C(6)15N(2)(K)@7                                                        | cleaved L-Y@N-term           | -0.00112976 | 938.498291 | 470.2564 | 938.499329 | 470.256928 | 2 | 9   | 17.7393 | 136.39 |
| 26 | 19.01  | 21.04  | 68.3 | PPP1R2_FlexIII  | 88.6 | YPTFLYK                              | Label: 13C(6)15N(2)(K)@7                                                        | cleaved S-Y@N-term           | -0.00112976 | 938.498291 | 470.2564 | 938.499329 | 470.256928 | 2 | 9   | 17.7393 | 212.16 |
| 28 | 15.45  | 17.52  | 61.8 | GEMIN6_FlexIII  | 88.6 | YPTFLYK                              | Label: 13C(6)15N(2)(K)@7                                                        | cleaved Q-Y@N-term           | -0.00112976 | 938.498291 | 470.2564 | 938.499329 | 470.256928 | 2 | 9   | 17.7393 | 223.55 |
| 31 | 12     | 14     | 71.3 | CDKN2D_FlexIII  | 88.6 | YPTFLYK                              | Label: 13C(6)15N(2)(K)@7                                                        | cleaved L-Y@N-term           | -0.00112976 | 938.498291 | 470.2564 | 938.499329 | 470.256928 | 2 | 9   | 17.7393 | 140.15 |
| 44 | 7.38   | 9.59   | 65.8 | CEBPG_FlexIII   | 88.6 | YPTFLYK                              | Label: 13C(6)15N(2)(K)@7                                                        | cleaved Q-Y@N-term           | -0.00112976 | 938.498291 | 470.2564 | 938.499329 | 470.256928 | 2 | 9   | 17.7393 | 79.94  |
| 53 | 4.63   | 6.81   | 20.1 | MYADM_FlexIII   | 88.6 | YPTFLYK                              | Label: 13C(6)15N(2)(K)@7                                                        | cleaved V-Y@N-term           | -0.00112976 | 938.498291 | 470.2564 | 938.499329 | 470.256928 | 2 | 9   | 17.7393 | 29.53  |
| 65 | 2      | 4      | 59.6 | LIMS1_FlexIII   | 88.6 | YPTFLYK                              | Label: 13C(6)15N(2)(K)@7                                                        |                              | -0.00112976 | 938.498291 | 470.2564 | 938.499329 | 470.256928 | 2 | 9   | 17.7393 | 4.68   |
| 93 | 0.45   | 15.81  | 67.3 | CAMK2B_FlexIII  | 88.6 | YPTFLYK                              | Label: 13C(6)15N(2)(K)@7                                                        | cleaved Q-Y@N-term           | -0.00112976 | 938.498291 | 470.2564 | 938.499329 | 470.256928 | 2 | 9   | 17.7393 | 20.90  |
| 12 | 41.66  | 43.83  | 57.8 | CEACAM5_FlexIII | 88.6 | LTIESTPPNVAEGKEVLLLVHNLQHLFGYSWYK    | Deamidated(N)@9; Label: 13C(6)15N(2)(K)@14; Label: 13C(6)15N(2)(K)@34           | missed K-E@14                | -0.0242322  | 3959.06006 | 792.8193 | 3959.08447 | 792.824158 | 5 | 11  | 20.4522 | 162.25 |
| 1  | 103.53 | 103.53 | 78.6 | DNM1L_FlexIII   | 88.6 | IFSPNVNLTLDLPGMTK                    | Label: 13C(6)15N(2)(K)@19                                                       |                              | -0.00805742 | 2065.1294  | 1033.572 | 2065.13721 | 1033.57593 | 2 | 7   | 21.2825 | 38.55  |
| 44 | 7.38   | 9.59   | 65.8 | CEBPG_FlexIII   | 88.4 | VNQLKEENER                           | Label: 13C(6)15N(2)(K)@5; Label: 13C(6)15N(4)(R)@10                             | missed K-E@5                 | 0.014433    | 1275.66821 | 426.23   | 1275.65381 | 426.22522  | 3 | 7   | 12.2662 | 79.94  |
| 14 | 38.32  | 40.36  | 61.0 | PPP3CA_FlexIII  | 88.0 | TLFLLR                               | Label: 13C(6)15N(4)(R)@6                                                        |                              | -0.00302328 | 771.485291 | 386.7499 | 771.48822  | 386.751404 | 2 | 7   | 18.7219 | 139.34 |
| 1  | 103.53 | 103.53 | 78.6 | DNM1L_FlexIII   | 87.8 | YPTFLYK                              | Label: 13C(6)15N(2)(K)@7                                                        | cleaved W-Y@N-term           | -0.00149597 | 938.497864 | 470.2562 | 938.499329 | 470.256928 | 2 | 9   | 17.7898 | 38.55  |
| 2  | 66.08  | 68.08  | 40.2 | RPS6KA1_FlexIII | 87.8 | YPTFLYK                              | Label: 13C(6)15N(2)(K)@7                                                        | cleaved L-Y@N-term           | -0.00149597 | 938.497864 | 470.2562 | 938.499329 | 470.256928 | 2 | 9   | 17.7898 | 114.74 |
| 3  | 60.89  | 62.89  | 59.3 | BTRC_FlexIII    | 87.8 | YPTFLYK                              | Label: 13C(6)15N(2)(K)@7                                                        |                              | -0.00149597 | 938.497864 | 470.2562 | 938.499329 | 470.256928 | 2 | 9   | 17.7898 | 41.90  |
| 4  | 58.58  | 60.58  | 70.0 | NET1_FlexIII    | 87.8 | YPTFLYK                              | Label: 13C(6)15N(2)(K)@7                                                        | cleaved V-Y@N-term           | -0.00149597 | 938.497864 | 470.2562 | 938.499329 | 470.256928 | 2 | 9   | 17.7898 | 4.38   |
| 5  | 56.01  | 58.01  | 69.8 | PKD1_FlexIII    | 87.8 | YPTFLYK                              | Label: 13C(6)15N(2)(K)@7                                                        | cleaved A-Y@N-term           | -0.00149597 | 938.497864 | 470.2562 | 938.499329 | 470.256928 | 2 | 9   | 17.7898 | 33.22  |
| 6  | 55.31  | 57.32  | 3.8  | CDC27_FlexIII   | 87.8 | YPTFLYK                              | Label: 13C(6)15N(2)(K)@7                                                        | cleaved F-Y@N-term           | -0.00149597 | 938.497864 | 470.2562 | 938.499329 | 470.256928 | 2 | 9   | 17.7898 | 0.76   |
| 7  | 54.8   | 57     | 71.4 | POLR3D_FlexIII  | 87.8 | YPTFLYK                              | Label: 13C(6)15N(2)(K)@7                                                        |                              | -0.00149597 | 938.497864 | 470.2562 | 938.499329 | 470.256928 | 2 | 9   | 17.7898 | 77.94  |
| 8  | 43.77  | 47.77  | 39.1 | ODF2_FlexIII    | 87.8 | YPTFLYK                              | Label: 13C(6)15N(2)(K)@7                                                        | cleaved A-Y@N-term           | -0.00149597 | 938.497864 | 470.2562 | 938.499329 | 470.256928 | 2 | 9   | 17.7898 | 9.70   |
| 9  | 43.4   | 45.4   | 53.4 | FBXW2_FlexIII   | 87.8 | YPTFLYK                              | Label: 13C(6)15N(2)(K)@7                                                        | cleaved G-Y@N-term           | -0.00149597 | 938.497864 | 470.2562 | 938.499329 | 470.256928 | 2 | 9   | 17.7898 | 87.11  |
| 10 | 42.4   | 44.59  | 60.6 | GPC4_FlexIII    | 87.8 | YPTFLYK                              | Label: 13C(6)15N(2)(K)@7                                                        |                              | -0.00149597 | 938.497864 | 470.2562 | 938.499329 | 470.256928 | 2 | 9   | 17.7898 | 84.97  |
| 11 | 42     | 44     | 63.3 | EFEMP1_FlexIII  | 87.8 | YPTFLYK                              | Label: 13C(6)15N(2)(K)@7                                                        | cleaved F-Y@N-term           | -0.00149597 | 938.497864 | 470.2562 | 938.499329 | 470.256928 | 2 | 9</ |         |        |

|    |        |        |                      |                                   |                                                                                                                                                      |                            |             |            |          |            |            |   |    |         |        |
|----|--------|--------|----------------------|-----------------------------------|------------------------------------------------------------------------------------------------------------------------------------------------------|----------------------------|-------------|------------|----------|------------|------------|---|----|---------|--------|
| 28 | 15.45  | 17.52  | 61.8 GEMIN6_FlexIII  | 87.8 YPTFLYK                      | Label: 13C(6)15N(2)(K)@7                                                                                                                             | cleaved Q-Y@N-term         | -0.00149597 | 938.497864 | 470.2562 | 938.499329 | 470.256928 | 2 | 9  | 17.7898 | 223.55 |
| 31 | 12     | 14     | 71.3 CDKN2D_FlexIII  | 87.8 YPTFLYK                      | Label: 13C(6)15N(2)(K)@7                                                                                                                             | cleaved L-Y@N-term         | -0.00149597 | 938.497864 | 470.2562 | 938.499329 | 470.256928 | 2 | 9  | 17.7898 | 140.15 |
| 44 | 7.38   | 9.59   | 65.8 CEBPG_FlexIII   | 87.8 YPTFLYK                      | Label: 13C(6)15N(2)(K)@7                                                                                                                             | cleaved Q-Y@N-term         | -0.00149597 | 938.497864 | 470.2562 | 938.499329 | 470.256928 | 2 | 9  | 17.7898 | 79.94  |
| 53 | 4.63   | 6.81   | 20.1 MYADM_FlexIII   | 87.5 YPTFLYK                      | Label: 13C(6)15N(2)(K)@7                                                                                                                             | cleaved V-Y@N-term         | -0.00149597 | 938.497864 | 470.2562 | 938.499329 | 470.256928 | 2 | 9  | 17.7898 | 29.53  |
| 65 | 2      | 4      | 59.6 LIMS1_FlexIII   | 87.8 YPTFLYK                      | Label: 13C(6)15N(2)(K)@7                                                                                                                             |                            | -0.00149597 | 938.497864 | 470.2562 | 938.499329 | 470.256928 | 2 | 9  | 17.7898 | 4.68   |
| 93 | 0.45   | 15.81  | 67.3 CAMK2B_FlexIII  | 87.3 YPTFLYK                      | Label: 13C(6)15N(2)(K)@7                                                                                                                             | cleaved Q-Y@N-term         | -0.00149597 | 938.497864 | 470.2562 | 938.499329 | 470.256928 | 2 | 9  | 17.7898 | 20.90  |
| 14 | 38.32  | 40.36  | 61.0 PPP3CA_FlexIII  | 87.6 VFSVLR                       | Label: 13C(6)15N(4)(R)@6                                                                                                                             |                            | -0.00269794 | 729.43866  | 365.7266 | 729.441284 | 365.727905 | 2 | 7  | 17.4573 | 139.34 |
| 1  | 103.53 | 103.53 | 78.6 DNM1L_FlexIII   | 87.5 SOLDINNKK                    | Label: 13C(6)15N(2)(K)@8; Label: 13C(6)15N(2)(K)@9                                                                                                   | missed K-K@8               | 0.00117559  | 1074.60144 | 538.308  | 1074.60046 | 538.307495 | 2 | 9  | 13.5056 | 38.55  |
| 1  | 103.53 | 103.53 | 78.6 DNM1L_FlexIII   | 87.5 VPGVDQPK                     | Label: 13C(6)15N(2)(K)@8                                                                                                                             |                            | -0.00149591 | 846.467651 | 424.2411 | 846.469055 | 424.241821 | 2 | 6  | 11.9647 | 38.55  |
| 12 | 41.66  | 43.83  | 57.8 CEACAM5_FlexIII | 87.5 QIIGYVIGTQATPGPAYSGR         | Gln->pyro-Glu@N-term; Label: 13C(6)15N(4)(R)@21                                                                                                      |                            | -0.00472418 | 2169.10547 | 1085.56  | 2169.10938 | 1085.56201 | 2 | 7  | 22.0167 | 162.25 |
| 13 | 39.31  | 41.31  | 63.5 CAMK2D_FlexIII  | 87.3 HPWICQR                      | Propionamide(C)@5; Label: 13C(6)15N(4)(R)@7                                                                                                          |                            | -0.00039455 | 1019.49945 | 510.757  | 1019.49988 | 510.757202 | 2 | 9  | 15.2322 | 95.69  |
| 12 | 41.66  | 43.83  | 57.8 CEACAM5_FlexIII | 87.1 LQLSNGNR                     | Label: 13C(6)15N(4)(R)@8                                                                                                                             |                            | -0.00152608 | 910.484497 | 456.2495 | 910.486023 | 456.250275 | 2 | 9  | 14.4101 | 162.25 |
| 24 | 19.83  | 21.83  | 48.3 FOS_FlexIII     | 87.0 EKEKLEFILAAHRPACK            | Label: 13C(6)15N(2)(K)@2; Label: 13C(6)15N(2)(K)@4; Label: 13C(6)15N(4)(R)@13; Propionamide(C)@16; Label: 13C(6)15N(2)(K) missed K-E@2; missed K-L@4 |                            | 0.00540572  | 2087.17065 | 522.7999 | 2087.16504 | 522.798584 | 4 | 10 | 15.9299 | 136.39 |
| 1  | 103.53 | 103.53 | 78.6 DNM1L_FlexIII   | 87.0 DCEVIER                      | Label: 13C(6)15N(2)(K)@8                                                                                                                             |                            | -0.00626367 | 943.424683 | 472.7196 | 943.430847 | 472.722687 | 2 | 9  | 14.7385 | 38.55  |
| 26 | 19.01  | 21.04  | 68.3 PPP1R2_FlexIII  | 86.9 TSSTSSMVASAEQPR              | Label: 13C(6)15N(4)(R)@15                                                                                                                            |                            | 0.00060974  | 1561.72864 | 781.8716 | 1561.72815 | 781.871338 | 2 | 7  | 22.9831 | 212.16 |
| 26 | 19.01  | 21.04  | 68.3 PPP1R2_FlexIII  | 86.9 TSSTSSMVASAEQPR              | Label: 13C(6)15N(4)(R)@15                                                                                                                            |                            | 0.0012201   | 1561.72925 | 781.8719 | 1561.72815 | 781.871338 | 2 | 6  | 27.7651 | 212.16 |
| 12 | 41.66  | 43.83  | 57.8 CEACAM5_FlexIII | 86.7 TLTLFNVTR                    | Label: 13C(6)15N(4)(R)@9                                                                                                                             |                            | -0.00027949 | 1073.61072 | 537.8126 | 1073.61084 | 537.812683 | 2 | 8  | 22.9915 | 162.25 |
| 14 | 38.32  | 40.36  | 61.0 PPP3CA_FlexIII  | 86.5 TQEHFTHNTVR                  | Label: 13C(6)15N(4)(R)@11                                                                                                                            |                            | -0.00175888 | 1378.66003 | 460.5606 | 1378.66174 | 460.561188 | 3 | 7  | 12.0996 | 139.34 |
| 14 | 38.32  | 40.36  | 61.0 PPP3CA_FlexIII  | 86.5 TQEHFTHNTVR                  |                                                                                                                                                      |                            | -0.00154229 | 1368.65198 | 457.2246 | 1368.65344 | 457.225098 | 3 | 7  | 12.3531 | 139.34 |
| 24 | 19.83  | 21.83  | 48.3 FOS_FlexIII     | 86.2 SSSMELK                      | Label: 13C(6)15N(2)(K)@8                                                                                                                             |                            | -0.0010468  | 901.466065 | 451.7403 | 901.467041 | 451.740784 | 2 | 9  | 15.9625 | 136.39 |
| 28 | 15.45  | 17.52  | 61.8 GEMIN6_FlexIII  | 86.2 NHIPITEQGDAPR                | Deamidated(N)@1; Label: 13C(6)15N(4)(R)@13                                                                                                           |                            | 0.02337     | 1457.73731 | 486.9197 | 1457.71387 | 486.911896 | 3 | 10 | 15.1558 | 223.55 |
| 28 | 15.45  | 17.52  | 61.8 GEMIN6_FlexIII  | 86.2 TLCVAGVLTIIDPPYPENCSSSNEILSR | Propionamide(C)@3; Deamidated(N)@18; Propionamide(C)@19; Label: 13C(6)15N(4)(R)@29                                                                   |                            | 0.0493813   | 3258.61719 | 1087.213 | 3258.56641 | 1087.19605 | 3 | 7  | 22.0357 | 223.55 |
| 28 | 15.45  | 17.52  | 61.8 GEMIN6_FlexIII  | 86.2 VTASEKNEYK                   | Label: 13C(6)15N(2)(K)@6; Label: 13C(6)15N(2)(K)@10                                                                                                  | missed K-N@6               | -0.00971076 | 1183.59583 | 395.5392 | 1183.60559 | 395.54245  | 3 | 7  | 10.3948 | 223.55 |
| 12 | 41.66  | 43.83  | 57.8 CEACAM5_FlexIII | 85.9 EVLLLVHNLPOHLFGYSWYKGER      | Label: 13C(6)15N(2)(K)@20; Label: 13C(6)15N(4)(R)@23                                                                                                 | missed K-G@20              | -0.0338086  | 2815.45923 | 564.0991 | 2815.49292 | 564.105835 | 5 | 10 | 19.0935 | 162.25 |
| 1  | 103.53 | 103.53 | 78.6 DNM1L_FlexIII   | 85.8 KYPSLANRNGTK                 | Label: 13C(6)15N(2)(K)@1; Label: 13C(6)15N(4)(R)@8; Deamidated(N)@9; Label: 13C(6)15N(2)(K)@12                                                       | missed K-Y@1; missed R-N@8 | 0.0101538   | 1374.75659 | 459.2595 | 1374.74658 | 459.256134 | 3 | 10 | 14.1311 | 38.55  |
| 18 | 32.93  | 34.93  | 58.8 CSNK1E_FlexIII  | 85.8 YASINTHLGIEQSR               | Label: 13C(6)15N(4)(R)@14                                                                                                                            |                            | 0.00050026  | 1597.80945 | 533.6104 | 1597.80884 | 533.61023  | 3 | 9  | 26.6228 | 24.43  |
| 13 | 39.31  | 41.31  | 63.5 CAMK2D_FlexIII  | 85.4 QETVDCLK                     | Propionamide(C)@8; Label: 13C(6)15N(2)(K)@8                                                                                                          |                            | -0.00065265 | 1013.49365 | 507.7541 | 1013.49432 | 507.754425 | 2 | 9  | 15.0549 | 95.69  |
| 16 | 36.84  | 38.92  | 46.6 C3ORD37_FlexIII | 85.4 IIAPIMR                      | Label: 13C(6)15N(4)(R)@6                                                                                                                             |                            | -0.00172581 | 709.416687 | 355.7156 | 709.418457 | 355.716492 | 2 | 7  | 15.3834 | 50.01  |
| 1  | 103.53 | 103.53 | 78.6 DNM1L_FlexIII   | 85.2 HPDFADACGLMNNNIEQRR          | Propionamide(C)@8; Label: 13C(6)15N(4)(R)@19; Label: 13C(6)15N(4)(R)@20                                                                              | missed R-R@19              | 0.00021829  | 2420.08643 | 606.0289 | 2420.08343 | 606.02887  | 4 | 10 | 16.8651 | 38.55  |
| 5  | 56.01  | 56.01  | 69.8 PDK1_FlexIII    | 84.9 AYPFTFLYK                    | Label: 13C(6)15N(2)(K)@8                                                                                                                             | cleaved S-A@N-term         | -0.00056409 | 1009.53589 | 505.7752 | 1009.53644 | 505.775482 | 2 | 9  | 17.7823 | 33.22  |
| 8  | 43.77  | 47.77  | 39.1 ODF2_FlexIII    | 84.9 AYPFTFLYK                    | Label: 13C(6)15N(2)(K)@8                                                                                                                             | cleaved P-A@N-term         | -0.00056409 | 1009.53589 | 505.7752 | 1009.53644 | 505.775482 | 2 | 9  | 17.7823 | 9.70   |
| 13 | 39.31  | 41.31  | 63.5 CAMK2D_FlexIII  | 84.9 FTDEYQLFEELGK                | Deamidated(Q)@6; Label: 13C(6)15N(2)(K)@13                                                                                                           |                            | 0.0140986   | 1626.76843 | 814.3915 | 1626.75452 | 814.384522 | 2 | 10 | 19.7442 | 95.69  |
| 13 | 39.31  | 41.31  | 63.5 CAMK2D_FlexIII  | 84.9 HPWICQR                      | Propionamide(C)@5; Label: 13C(6)15N(4)(R)@7                                                                                                          |                            | -0.00039455 | 1019.49945 | 510.757  | 1019.49988 | 510.757202 | 2 | 9  | 15.2345 | 95.69  |
| 13 | 39.31  | 41.31  | 63.5 CAMK2D_FlexIII  | 84.9 QETVDCLK                     | Propionamide(C)@6; Label: 13C(6)15N(2)(K)@8                                                                                                          |                            | -0.00065265 | 1013.49365 | 507.7541 | 1013.49432 | 507.754425 | 2 | 9  | 15.0724 | 95.69  |
| 28 | 15.45  | 17.52  | 61.8 GEMIN6_FlexIII  | 84.9 NHIPITEQGDAPR                | Deamidated(N)@1; Label: 13C(6)15N(4)(R)@13                                                                                                           |                            | -6.76E-05   | 1457.71387 | 486.9119 | 1457.71387 | 486.911896 | 3 | 10 | 15.4025 | 223.55 |
| 8  | 43.77  | 47.77  | 39.1 ODF2_FlexIII    | 84.6 LSTFEETNR                    | Label: 13C(6)15N(4)(R)@9                                                                                                                             |                            | -0.00092064 | 1105.5271  | 553.7708 | 1105.52795 | 553.77124  | 2 | 9  | 15.3535 | 9.70   |
| 7  | 54.8   | 57     | 71.4 POLR3D_FlexIII  | 84.6 DDFLDQPLGR                   | Label: 13C(6)15N(4)(R)@10                                                                                                                            |                            | 0.00129333  | 1171.53992 | 586.7772 | 1171.53845 | 586.776489 | 2 | 9  | 17.9705 | 77.94  |
| 24 | 19.83  | 21.83  | 48.3 FOS_FlexIII     | 84.5 TEPFDDFLTASSRPSGSETAR        | Label: 13C(6)15N(4)(R)@14; Label: 13C(6)15N(4)(R)@22                                                                                                 |                            | -0.00485495 | 2433.1294  | 1217.572 | 2433.13525 | 1217.57483 | 2 | 10 | 18.6849 | 136.39 |
| 26 | 19.01  | 21.04  | 68.3 PPP1R2_FlexIII  | 84.4 SSSYPTFLYK                   | Label: 13C(6)15N(2)(K)@9                                                                                                                             |                            | 2.98E-05    | 1112.56348 | 557.289  | 1112.56335 | 557.28894  | 2 | 9  | 17.6609 | 212.16 |
| 14 | 38.32  | 40.36  | 61.0 PPP3CA_FlexIII  | 84.4 LEESVALR                     | Label: 13C(6)15N(4)(R)@8                                                                                                                             |                            | -0.00111628 | 925.509644 | 463.7621 | 925.510803 | 463.762695 | 2 | 9  | 15.8641 | 139.34 |
| 19 | 28     | 30     | 42.2 FKBP3_FlexIII   | 84.1 SEQLPK                       | Label: 13C(6)15N(2)(K)@6                                                                                                                             |                            | -0.00027083 | 708.389465 | 355.202  | 708.389771 | 355.202148 | 2 | 7  | 13.6219 | 106.31 |
| 1  | 103.53 | 103.53 | 78.6 DNM1L_FlexIII   | 83.9 DCEVIER                      | Propionamide(C)@2; Label: 13C(6)15N(4)(R)@7                                                                                                          |                            | -3.81E-05   | 943.430847 | 472.7227 | 943.430847 | 472.722687 | 2 | 9  | 14.7713 | 38.55  |
| 1  | 103.53 | 103.53 | 78.6 DNM1L_FlexIII   | 83.9 SSVLESVLGR                   | Label: 13C(6)15N(4)(R)@10                                                                                                                            |                            | -6.65E-06   | 1055.58508 | 528.7998 | 1055.58508 | 528.799805 | 2 | 7  | 22.2085 | 38.55  |
| 18 | 32.93  | 34.93  | 58.8 CSNK1E_FlexIII  | 83.4 TVLLADQMISR                  | Deamidated(Q)@8; Label: 13C(6)15N(4)(R)@12                                                                                                           |                            | 0.0153229   | 1369.76685 | 685.8907 | 1369.75147 | 685.882996 | 2 | 10 | 19.0657 | 24.43  |
| 26 | 19.01  | 21.04  | 68.3 PPP1R2_FlexIII  | 82.7 SSSYPTFLYK                   | Label: 13C(6)15N(2)(K)@9                                                                                                                             |                            | 0.00027392  | 1112.56372 | 557.2891 | 1112.56335 | 557.28894  | 2 | 9  | 17.6886 | 212.16 |
| 26 | 19.01  | 21.04  | 68.3 PPP1R2_FlexIII  | 82.7 SSSYPTFLYK                   | Label: 13C(6)15N(2)(K)@9                                                                                                                             |                            | 2.98E-05    | 1112.56348 | 557.289  | 1112.56335 | 557.28894  | 2 | 9  | 17.7187 | 212.16 |
| 12 | 41.66  | 43.83  | 57.8 CEACAM5_FlexIII | 82.3 SDLVNEEATGQFR                | Label: 13C(6)15N(4)(R)@13                                                                                                                            |                            | -0.00883836 | 1474.68384 | 738.3492 | 1474.69275 | 738.353638 | 2 | 8  | 21.4896 | 162.25 |
| 12 | 41.66  | 43.83  | 57.8 CEACAM5_FlexIII | 82.3 SDLVNEEATGQFR                | Deamidated(N)@5; Label: 13C(6)15N(4)(R)@13                                                                                                           |                            | 0.0271664   | 1475.7041  | 738.8593 | 1475.67676 | 738.845642 | 2 | 8  | 21.4947 | 162.25 |
| 8  | 43.77  | 47.77  | 39.1 ODF2_FlexIII    | 82.0 LSTFEETNR                    | Label: 13C(6)15N(4)(R)@9                                                                                                                             |                            | -0.00055442 | 1105.52722 | 553.7709 | 1105.52795 | 553.77124  | 2 | 9  | 15.4064 | 9.70   |
| 24 | 19.83  | 21.83  | 48.3 FOS_FlexIII     | 82.0 SSSMELK                      | Label: 13C(6)15N(2)(K)@8                                                                                                                             |                            | -0.0010468  | 901.466065 | 451.7403 | 901.467041 | 451.740784 | 2 | 9  | 16.0075 | 136.39 |
| 14 | 38.32  | 40.36  | 61.0 PPP3CA_FlexIII  | 82.0 TQEHFTHNTVR                  |                                                                                                                                                      |                            | -0.00154229 | 1368.65198 | 457.2246 | 1368.65344 | 457.225098 | 3 | 7  | 12.3581 | 139.34 |
| 26 | 19.01  | 21.04  | 68.3 PPP1R2_FlexIII  | 81.5 SSSYPTFLYK                   | Label: 13C(6)15N(2)(K)@9                                                                                                                             |                            | -0.00023598 | 1104.54883 | 553.2817 | 1104.54919 | 553.28186  | 2 | 9  | 17.8049 | 212.16 |
| 14 | 38.32  | 40.36  | 61.0 PPP3CA_FlexIII  | 81.4 QTLQSAIK                     | Gln->pyro-Glu@N-term; Label: 13C(6)15N(2)(K)@8                                                                                                       |                            | -0.00104666 | 878.494263 | 440.2544 | 878.4953   | 440.254913 | 2 | 9  | 16.913  | 139.34 |
| 19 | 28     | 30     | 42.2 FKBP3_FlexIII   | 81.2 LLGNK                        | Label: 13C(6)15N(2)(K)@6                                                                                                                             |                            | -0.00050405 | 664.435852 | 333.2252 | 664.436279 | 333.225433 | 2 | 7  | 15.8752 | 106.31 |
| 12 | 41.66  | 43.83  | 57.8 CEACAM5_FlexIII | 80.2 MESPSAPPHR                   | Label: 13C(6)15N(4)(R)@10                                                                                                                            |                            | -0.00287429 | 1117.51868 | 373.5135 | 1117.52136 | 373.514404 | 3 | 9  | 13.3739 | 162.25 |
| 12 | 41.66  | 43.83  | 57.8 CEACAM5_FlexIII | 80.2 MESPSAPPHR                   | Label: 13C(6)15N(4)(R)@10                                                                                                                            |                            | -0.0034236  | 1117.51807 | 373.5133 | 1117.52136 | 373.514404 | 3 | 9  | 13.4621 | 162.25 |
| 16 | 36.84  | 38.92  | 46.6 C3ORD37_FlexIII | 79.9 IIAPIMR                      | Label: 13C(6)15N(4)(R)@6                                                                                                                             |                            | -0.00154271 | 709.41687  | 355.7157 | 709.418457 | 355.716492 | 2 | 7  | 15.3607 | 50.01  |
| 16 | 36.84  | 38.92  | 46.6 C3ORD37_FlexIII | 79.9 LHFDKDNADSSER                | Label: 13C(6)15N(2)(K)@5; Label: 13C(6)15N(4)(R)@12                                                                                                  | missed K-D@5               | -0.00149732 | 1436.66345 | 479.8951 | 1436.66504 | 479.89563  | 3 | 9  | 14.0595 | 50.01  |
| 19 | 28     | 30     | 42.2 FKBP3_FlexIII   | 79.6 LLGNK                        | Label: 13C(6)15N(2)(K)@6                                                                                                                             |                            | -0.00050405 | 664.435852 | 333.2252 | 664.436279 | 333.225433 | 2 | 7  | 15.8377 | 106.31 |
| 26 | 19.01  | 21.04  | 68.3 PPP1R2_FlexIII  | 79.6 DYGLMK                       | Label: 13C(6)15N(2)(K)@6                                                                                                                             |                            | -0.00330346 | 733.352661 | 367.6836 | 733.356018 | 367.685272 | 2 | 7  | 16.2846 | 212.16 |
| 1  | 103.53 | 103.53 | 78.6 DNM1L_FlexIII   | 79.4 GVSPEPIHLK                   | Label:                                                                                                                                               |                            |             |            |          |            |            |   |    |         |        |

|   |       |       |                  |                                  |                                                                                                   |                                |             |            |          |            |            |   |    |         |       |
|---|-------|-------|------------------|----------------------------------|---------------------------------------------------------------------------------------------------|--------------------------------|-------------|------------|----------|------------|------------|---|----|---------|-------|
| 1 | 72.1  | 72.1  | 60.4 RNf8_FlexII | 99.0 INKVSCESGQPVK               | Label: 13C(6)15N(2)(K) @ 6; Label: 13C(6)15N(2)(K) @ 13                                           | missed K-V @ 3                 | 0.00853404  | 1474.78711 | 738.4008 | 1474.77844 | 738.396484 | 2 | 13 | 13.1604 | 17.06 |
| 1 | 72.1  | 72.1  | 60.4 RNf8_FlexII | 99.0 IQM0EKHEAVMNVK              | Label: 13C(6)15N(2)(K) @ 6; Label: 13C(6)15N(2)(K) @ 14                                           | missed K-H @ 6                 | -0.00163977 | 1699.87024 | 567.6307 | 1699.87207 | 567.631287 | 3 | 13 | 14.6063 | 17.06 |
| 1 | 72.1  | 72.1  | 60.4 RNf8_FlexII | 99.0 KFSLDELAGPGAEGPSNLK         | Label: 13C(6)15N(2)(K) @ 1; Label: 13C(6)15N(2)(K) @ 19                                           | missed K-F @ 1                 | -0.00576097 | 1945.00708 | 973.5108 | 1945.0127  | 973.513672 | 2 | 27 | 17.8603 | 17.06 |
| 1 | 72.1  | 72.1  | 60.4 RNf8_FlexII | 99.0 KVVMQEQELQDLQSQLCAEQAAQQQAR | Label: 13C(6)15N(2)(K) @ 1; Deamidated(Q) @ 15; Propionamide(C) @ 17; Label: 13C(6)15N(4)(R) @ 26 | missed K-V @ 1                 | -0.00371255 | 3118.51123 | 1040.511 | 3118.51416 | 1040.51196 | 3 | 24 | 19.2945 | 17.06 |
| 1 | 72.1  | 72.1  | 60.4 RNf8_FlexII | 99.0 LTALEPSKTTGAPIYGPFPK        | Label: 13C(6)15N(2)(K) @ 8; Label: 13C(6)15N(2)(K) @ 20                                           | missed K-T @ 8                 | 0.0017155   | 2103.1604  | 702.0607 | 2103.15869 | 702.060181 | 3 | 12 | 17.7698 | 17.06 |
| 1 | 72.1  | 72.1  | 60.4 RNf8_FlexII | 99.0 MVNNLSSEVK                  | Label: 13C(6)15N(2)(K) @ 10                                                                       |                                | 0.00096464  | 1127.57471 | 564.7946 | 1127.57361 | 564.794067 | 2 | 13 | 15.3635 | 17.06 |
| 1 | 72.1  | 72.1  | 60.4 RNf8_FlexII | 99.0 MVNNLSSEVKER                | Label: 13C(6)15N(2)(K) @ 10; Label: 13C(6)15N(4)(R) @ 12                                          | missed K-E @ 10                | -0.00047839 | 1422.7251  | 712.3698 | 1422.72559 | 712.370056 | 2 | 16 | 15.0897 | 17.06 |
| 1 | 72.1  | 72.1  | 60.4 RNf8_FlexII | 99.0 QNPGEQWTIMDNK               | Gln->pyro-Glu @ N-term; Label: 13C(6)15N(2)(K) @ 13                                               |                                | -0.00458919 | 1550.68689 | 776.3507 | 1550.69153 | 776.353027 | 2 | 15 | 18.2241 | 17.06 |
| 1 | 72.1  | 72.1  | 60.4 RNf8_FlexII | 99.0 QQLAQALQEHWALMEELNR         | Gln->pyro-Glu @ N-term; Label: 13C(6)15N(4)(R) @ 19                                               |                                | -0.00086165 | 2300.12378 | 767.7152 | 2300.12476 | 767.715515 | 3 | 22 | 20.2356 | 17.06 |
| 1 | 72.1  | 72.1  | 60.4 RNf8_FlexII | 99.0 RKFSLDELAGPGAEGPSNLK        | Label: 13C(6)15N(4)(R) @ 1; Label: 13C(6)15N(2)(K) @ 2; Label: 13C(6)15N(2)(K) @ 20               | missed R-K @ 1; missed K-F @ 2 | -0.0116548  | 2111.1106  | 704.7108 | 2111.12207 | 704.714661 | 3 | 13 | 17.2163 | 17.06 |
| 1 | 72.1  | 72.1  | 60.4 RNf8_FlexII | 99.0 RVGMSAGWLLLEDGCEVTVGR       | Label: 13C(6)15N(4)(R) @ 1; Propionamide(C) @ 15; Label: 13C(6)15N(4)(R) @ 21                     | missed R-V @ 1                 | -0.0171879  | 2338.15015 | 780.3907 | 2338.16773 | 780.396484 | 3 | 14 | 26.8336 | 17.06 |
| 1 | 72.1  | 72.1  | 60.4 RNf8_FlexII | 99.0 SKKDFAEIIQAK                | Label: 13C(6)15N(2)(K) @ 2; Label: 13C(6)15N(2)(K) @ 3; Label: 13C(6)15N(2)(K) @ 12               | missed K-K @ 2; missed K-D @ 3 | -0.00858273 | 1400.80029 | 467.9407 | 1400.80896 | 467.943604 | 3 | 15 | 16.065  | 17.06 |
| 1 | 72.1  | 72.1  | 60.4 RNf8_FlexII | 99.0 SKTYSVLVDNCINK              | Label: 13C(6)15N(2)(K) @ 2; Propionamide(C) @ 11; Label: 13C(6)15N(2)(K) @ 14                     | missed K-T @ 2                 | 0.00332853  | 1683.88684 | 842.9507 | 1683.88367 | 842.949097 | 2 | 21 | 16.9046 | 17.06 |
| 1 | 72.1  | 72.1  | 60.4 RNf8_FlexII | 99.0 SQGKGEVASTDNLDPK            | Label: 13C(6)15N(2)(K) @ 4; Label: 13C(6)15N(2)(K) @ 18                                           | missed K-G @ 4                 | 0.00443224  | 1844.91309 | 923.4638 | 1844.90869 | 923.461609 | 2 | 23 | 14.3433 | 17.06 |
| 1 | 72.1  | 72.1  | 60.4 RNf8_FlexII | 99.0 TFQEEEHQLQGLEIAQGEK         | Label: 13C(6)15N(2)(K) @ 19                                                                       |                                | 0.0128481   | 2221.0874  | 1111.551 | 2221.07422 | 1111.54443 | 2 | 31 | 17.2651 | 17.06 |
| 1 | 72.1  | 72.1  | 60.4 RNf8_FlexII | 99.0 TQEEEQHQLQGLEIAQGEKDLK      | Deamidated(Q) @ 7; Label: 13C(6)15N(2)(K) @ 19; Label: 13C(6)15N(2)(K) @ 22                       | missed K-D @ 19                | 0.0319734   | 2586.3103  | 863.1107 | 2586.27832 | 863.100098 | 3 | 16 | 17.3813 | 17.06 |
| 1 | 72.1  | 72.1  | 60.4 RNf8_FlexII | 99.0 TTGAPIYGPFPK                | Label: 13C(6)15N(2)(K) @ 12                                                                       |                                | -0.00028244 | 1255.66882 | 628.8417 | 1255.66919 | 628.841858 | 2 | 12 | 17.682  | 17.06 |
| 1 | 72.1  | 72.1  | 60.4 RNf8_FlexII | 99.0 TYSVLVDNCINK                | Propionamide(C) @ 9; Label: 13C(6)15N(2)(K) @ 12                                                  |                                | -0.00136818 | 1460.74109 | 731.3778 | 1460.74243 | 731.378479 | 2 | 14 | 17.5959 | 17.06 |
| 1 | 72.1  | 72.1  | 60.4 RNf8_FlexII | 99.0 VGSAGWLLLEDGCEVTVGR         | Propionamide(C) @ 14; Label: 13C(6)15N(4)(R) @ 20                                                 |                                | -0.00214902 | 2172.05542 | 1087.035 | 2172.05835 | 1087.03638 | 2 | 19 | 20.105  | 17.06 |
| 1 | 72.1  | 72.1  | 60.4 RNf8_FlexII | 99.0 VVMQEQELQDLQSQLCAEQAAQQQAR  | Propionamide(C) @ 16; Label: 13C(6)15N(4)(R) @ 25                                                 |                                | 0.00593908  | 2981.42725 | 1491.721 | 2981.42114 | 1491.71777 | 2 | 28 | 19.649  | 17.06 |
| 1 | 72.1  | 72.1  | 60.4 RNf8_FlexII | 99.0 VYSIHGDYIQLGVPLENK          | Label: 13C(6)15N(2)(K) @ 19                                                                       |                                | -0.00883738 | 2180.12744 | 1091.071 | 2180.13574 | 1091.0752  | 2 | 21 | 18.0733 | 17.06 |
| 1 | 72.1  | 72.1  | 60.4 RNf8_FlexII | 99.0 YPTFLYK                     | Label: 13C(6)15N(2)(K) @ 7                                                                        | cleaved F-Y @ N-term           | -0.00165037 | 938.497681 | 470.2561 | 938.499329 | 470.256928 | 2 | 9  | 18.0092 | 17.06 |
| 1 | 72.1  | 72.1  | 60.4 RNf8_FlexII | 99.0 DLKQLAQALQEHWALMEELNR       | Label: 13C(6)15N(2)(K) @ 3; Deamidated(Q) @ 11; Label: 13C(6)15N(4)(R) @ 22                       | missed K-Q @ 3                 | 0.0183268   | 2682.37378 | 671.6007 | 2682.35547 | 671.59613  | 4 | 17 | 20.2245 | 17.06 |
| 1 | 72.1  | 72.1  | 60.4 RNf8_FlexII | 99.0 FSLDELAGPGAEGPSNLK          | Label: 13C(6)15N(2)(K) @ 18                                                                       |                                | 0.0003657   | 1808.90393 | 905.4592 | 1808.90356 | 905.459045 | 2 | 17 | 18.757  | 17.06 |
| 1 | 72.1  | 72.1  | 60.4 RNf8_FlexII | 99.0 FSLDELAGPGAEGPSNLK          | Label: 13C(6)15N(2)(K) @ 18                                                                       |                                | 0.00134226  | 1808.90491 | 905.4597 | 1808.90356 | 905.459045 | 2 | 16 | 18.4972 | 17.06 |
| 1 | 72.1  | 72.1  | 60.4 RNf8_FlexII | 99.0 FSLDELAGPGAEGPSNLK          |                                                                                                   |                                | -0.00240358 | 1800.88684 | 901.4507 | 1800.8894  | 901.451965 | 2 | 15 | 18.6189 | 17.06 |
| 1 | 72.1  | 72.1  | 60.4 RNf8_FlexII | 99.0 KFSLDELAGPGAEGPSNLK         | Label: 13C(6)15N(2)(K) @ 1; Label: 13C(6)15N(2)(K) @ 19                                           | missed K-F @ 1                 | -0.0122699  | 1945.00061 | 649.3408 | 1945.0127  | 649.344849 | 3 | 17 | 17.8103 | 17.06 |
| 1 | 72.1  | 72.1  | 60.4 RNf8_FlexII | 99.0 KFSLDELAGPGAEGPSNLK         | Label: 13C(6)15N(2)(K) @ 1; Deamidated(N) @ 17; Label: 13C(6)15N(2)(K) @ 19                       | missed K-F @ 1                 | 0.0102235   | 1946.00708 | 974.0108 | 1945.99683 | 974.005676 | 2 | 12 | 17.8033 | 17.06 |
| 1 | 72.1  | 72.1  | 60.4 RNf8_FlexII | 99.0 KVVMQEQELQDLQSQLCAEQAAQQQAR | Label: 13C(6)15N(2)(K) @ 1; Deamidated(Q) @ 15; Propionamide(C) @ 17; Label: 13C(6)15N(4)(R) @ 26 | missed K-V @ 1                 | 0.0197468   | 3118.53369 | 780.6407 | 3118.51416 | 780.635803 | 4 | 22 | 19.014  | 17.06 |
| 1 | 72.1  | 72.1  | 60.4 RNf8_FlexII | 99.0 KVVMQEQELQDLQSQLCAEQAAQQQAR | Label: 13C(6)15N(2)(K) @ 1; Deamidated(Q) @ 13; Propionamide(C) @ 17; Label: 13C(6)15N(4)(R) @ 26 | missed K-V @ 1                 | 0.0263167   | 3118.54126 | 1040.521 | 3118.51416 | 1040.51196 | 3 | 25 | 19.0372 | 17.06 |
| 1 | 72.1  | 72.1  | 60.4 RNf8_FlexII | 99.0 MVNNLSSEVK                  | Label: 13C(6)15N(2)(K) @ 10                                                                       |                                | -0.00672579 | 1127.5669  | 564.7907 | 1127.57361 | 564.794067 | 2 | 13 | 15.6319 | 17.06 |
| 1 | 72.1  | 72.1  | 60.4 RNf8_FlexII | 99.0 QNPGEQWTIMDNK               | Label: 13C(6)15N(2)(K) @ 13                                                                       |                                | 0.00890176  | 1567.72693 | 784.8707 | 1567.71802 | 784.866272 | 2 | 12 | 17.2426 | 17.06 |
| 1 | 72.1  | 72.1  | 60.4 RNf8_FlexII | 99.0 QNPGEQWTIMDNK               | Label: 13C(6)15N(2)(K) @ 13                                                                       |                                | -0.00049765 | 1567.71753 | 784.866  | 1567.71802 | 784.866272 | 2 | 12 | 17.516  | 17.06 |
| 1 | 72.1  | 72.1  | 60.4 RNf8_FlexII | 99.0 QQLAQALQEHWALMEELNR         | Label: 13C(6)15N(4)(R) @ 19                                                                       |                                | 0.00442879  | 2317.15527 | 1159.585 | 2317.15137 | 1159.58289 | 2 | 21 | 19.5425 | 17.06 |
| 1 | 72.1  | 72.1  | 60.4 RNf8_FlexII | 99.0 QQLAQALQEHWALMEELNR         | Deamidated(Q) @ 5; Label: 13C(6)15N(4)(R) @ 19                                                    |                                | 0.0116242   | 2318.14746 | 1160.081 | 2318.13525 | 1160.07495 | 2 | 17 | 19.3983 | 17.06 |
| 1 | 72.1  | 72.1  | 60.4 RNf8_FlexII | 99.0 QQLAQALQEHWALMEELNR         | Gln->pyro-Glu @ N-term; Label: 13C(6)15N(4)(R) @ 19                                               |                                | -0.0142283  | 2300.1106  | 767.7108 | 2300.12476 | 767.715515 | 3 | 14 | 20.5085 | 17.06 |
| 1 | 72.1  | 72.1  | 60.4 RNf8_FlexII | 99.0 QQLAQALQEHWALMEELNR         | Deamidated(Q) @ 5                                                                                 |                                | 0.0234543   | 2308.15015 | 770.3907 | 2308.12695 | 770.382935 | 3 | 14 | 19.4744 | 17.06 |
| 1 | 72.1  | 72.1  | 60.4 RNf8_FlexII | 99.0 QQLAQALQEHWALMEELNR         | Deamidated(Q) @ 5; Label: 13C(6)15N(4)(R) @ 19                                                    |                                | 0.0350835   | 2318.17041 | 773.7307 | 2318.13525 | 773.719055 | 3 | 13 | 19.361  | 17.06 |
| 1 | 72.1  | 72.1  | 60.4 RNf8_FlexII | 99.0 RVGMSAGWLLLEDGCEVTVGR       | Label: 13C(6)15N(4)(R) @ 1; Propionamide(C) @ 15; Label: 13C(6)15N(4)(R) @ 21                     | missed R-V @ 1                 | -0.0171879  | 2338.15015 | 780.3907 | 2338.16773 | 780.396484 | 3 | 21 | 19.321  | 17.06 |
| 1 | 72.1  | 72.1  | 60.4 RNf8_FlexII | 99.0 RVGMSAGWLLLEDGCEVTVGR       | Label: 13C(6)15N(4)(R) @ 1; Propionamide(C) @ 15; Label: 13C(6)15N(4)(R) @ 21                     | missed R-V @ 1                 | 0.0128414   | 2338.18066 | 780.4008 | 2338.16773 | 780.396484 | 3 | 22 | 19.5862 | 17.06 |
| 1 | 72.1  | 72.1  | 60.4 RNf8_FlexII | 99.0 RVGMSAGWLLLEDGCEVTVGR       | Label: 13C(6)15N(4)(R) @ 1; Propionamide(C) @ 15; Label: 13C(6)15N(4)(R) @ 21                     | missed R-V @ 1                 | 0.0128414   | 2338.18066 | 780.4008 | 2338.16773 | 780.396484 | 3 | 19 | 19.9466 | 17.06 |
| 1 | 72.1  | 72.1  | 60.4 RNf8_FlexII | 99.0 RVGMSAGWLLLEDGCEVTVGR       | Label: 13C(6)15N(4)(R) @ 1; Propionamide(C) @ 15; Label: 13C(6)15N(4)(R) @ 21                     | missed R-V @ 1                 | 0.0196163   | 2338.18726 | 780.403  | 2338.16773 | 780.396484 | 3 | 21 | 26.9955 | 17.06 |
| 1 | 72.1  | 72.1  | 60.4 RNf8_FlexII | 99.0 SKTYSVLVDNCINK              | Label: 13C(6)15N(2)(K) @ 2; Propionamide(C) @ 11; Label: 13C(6)15N(2)(K) @ 14                     | missed K-T @ 2                 | -6.60E-06   | 1683.88367 | 562.3018 | 1683.88367 | 562.301819 | 3 | 14 | 16.9024 | 17.06 |
| 1 | 72.1  | 72.1  | 60.4 RNf8_FlexII | 99.0 TFQEEEHQLQGLEIAQGEK         | Deamidated(Q) @ 10; Label: 13C(6)15N(2)(K) @ 19                                                   |                                | 0.0088131   | 2222.06738 | 1112.041 | 2222.05835 | 1112.03638 | 2 | 21 | 17.5427 | 17.06 |
| 1 | 72.1  | 72.1  | 60.4 RNf8_FlexII | 99.0 TFQEEEHQLQGLEIAQGEK         | Label: 13C(6)15N(2)(K) @ 19                                                                       |                                | 0.00243294  | 2221.07642 | 741.3661 | 2221.07422 | 741.365356 | 3 | 13 | 17.285  | 17.06 |
| 1 | 72.1  | 72.1  | 60.4 RNf8_FlexII | 99.0 TTGAPIYGPFPK                | Label: 13C(6)15N(2)(K) @ 12                                                                       |                                | -0.00223556 | 1255.66711 | 628.8408 | 1255.66919 | 628.841858 | 2 | 12 | 17.4061 | 17.06 |
| 1 | 72.1  | 72.1  | 60.4 RNf8_FlexII | 99.0 TYSVLVDNCINK                | Propionamide(C) @ 9; Label: 13C(6)15N(2)(K) @ 12                                                  |                                | -0.0155283  | 1460.72693 | 731.3707 | 1460.74243 | 731.378479 | 2 | 13 | 17.8793 | 17.06 |
| 1 | 72.1  | 72.1  | 60.4 RNf8_FlexII | 99.0 VGMSAGWLLLEDGCEVTVGR        | Propionamide(C) @ 14; Label: 13C(6)15N(4)(R) @ 20                                                 |                                | -0.0112331  | 2172.04736 | 1087.031 | 2172.05835 | 1087.03638 | 2 | 25 | 20.0621 | 17.06 |
| 1 | 72.1  | 72.1  | 60.4 RNf8_FlexII | 99.0 VGMSAGWLLLEDGCEVTVGR        | Propionamide(C) @ 14; Label: 13C(6)15N(4)(R) @ 20                                                 |                                | 0.00365949  | 2172.06128 | 1087.038 | 2172.05835 | 1087.03638 | 2 | 22 | 20.3205 | 17.06 |
| 1 | 72.1  | 72.1  | 60.4 RNf8_FlexII | 99.0 VGMSAGWLLLEDGCEVTVGR        | Propionamide(C) @ 14; Label: 13C(6)15N(4)(R) @ 20                                                 |                                | 0.00878644  | 2172.06738 | 1087.041 | 2172.05835 | 1087.03638 | 2 | 12 | 21.2336 | 17.06 |
| 1 | 72.1  | 72.1  | 60.4 RNf8_FlexII | 99.0 VVMQEQELQDLQSQLCAEQAAQQQAR  | Deamidated(Q) @ 12; Propionamide(C) @ 16; Label: 13C(6)15N(4)(R) @ 25                             |                                | 0.0254854   | 2982.43066 | 995.1508 | 2982.40503 | 995.142273 | 3 | 21 | 19.5403 | 17.06 |
| 1 | 72.1  | 72.1  | 60.4 RNf8_FlexII | 99.0 VVMQEQELQDLQSQLCAEQAAQQQAR  | Deamidated(Q) @ 12; Propionamide(C) @ 16; Label: 13C(6)15N(4)(R) @ 25                             |                                | 0.00878358  | 2982.41382 | 746.6107 | 2982.40503 | 746.608521 | 4 | 19 | 19.5533 | 17.06 |
| 1 | 72.1  | 72.1  | 60.4 RNf8_FlexII | 99.0 VVMQEQELQDLQSQLCAEQAAQQQAR  | Propionamide(C) @ 16; Deamidated(Q) @ 19; Label: 13C(6)15N(4)(R) @ 25                             |                                | 0.0254854   | 2982.43066 | 995.1508 | 2982.40503 | 995.142273 | 3 | 23 | 19.817  | 17.06 |
| 1 | 72.1  | 72.1  | 60.4 RNf8_FlexII | 99.0 YPTFLYK                     | Label: 13C(6)15N(2)(K) @ 7                                                                        | cleaved F-Y @ N-term           | 0.00020099  | 938.499451 | 470.257  | 938.499329 | 470.256928 | 2 | 9  | 17.9008 | 17.06 |
| 1 | 72.1  | 72.1  | 60.4 RNf8_FlexII | 99.0 YPTFLYK                     | Label: 13C(6)15N(2)(K) @ 7                                                                        | cleaved F-Y @ N-term           | -0.00091407 | 938.498474 | 470.2565 | 938.499329 | 470.256928 | 2 | 9  | 17.7612 | 17.06 |
| 2 | 66.54 | 68.54 | 65.5 FZR1_FlexII | 99.0 AGANWSVNFHR                 | Label: 13C(6)15N(4)(R) @ 11                                                                       |                                | -0.00264037 | 1267.60584 | 634.8102 | 1267.60852 | 634.811585 | 2 | 13 | 16.6166 | 12.66 |
| 2 | 66.54 | 68.54 | 65.5 FZR1_FlexII | 99.0 AIAWSPHGHGLGSLGGGTADR       | Label: 13C(6)15N(4)(R) @ 21                                                                       |                                | -0.0063778  | 2111.04736 | 1056.531 | 2111.05371 | 1056.53406 | 2 | 22 |         |       |

|   |       |       |                   |                              |                                                                                     |                                |             |            |          |            |            |   |    |         |       |
|---|-------|-------|-------------------|------------------------------|-------------------------------------------------------------------------------------|--------------------------------|-------------|------------|----------|------------|------------|---|----|---------|-------|
| 2 | 66.54 | 68.54 | 65.5 FZR1_FlexIII | 99.0 GLFTYSLSTKR             | Label: 13C(6)15N(2)(K) @ 10; Label: 13C(6)15N(4)(R) @ 11                            | missed K-R @ 10                | -0.00391516 | 1289.70593 | 645.8602 | 1289.70984 | 645.862183 | 2 | 12 | 17.5403 | 12.66 |
| 2 | 66.54 | 68.54 | 65.5 FZR1_FlexIII | 99.0 HANELYSTHGYSONQLVWK     | Deamidated(Q) @ 13; Label: 13C(6)15N(2)(K) @ 20                                     |                                | 0.0182972   | 2332.18726 | 1167.101 | 2332.16919 | 1167.0918  | 2 | 16 | 17.4842 | 12.66 |
| 2 | 66.54 | 68.54 | 65.5 FZR1_FlexIII | 99.0 IRYPTFLYK               | Label: 13C(6)15N(4)(R) @ 2; Label: 13C(6)15N(2)(K) @ 9                              | missed R-Y @ 2                 | -0.0003413  | 1217.69251 | 609.8535 | 1217.69275 | 609.853638 | 2 | 12 | 17.9401 | 12.66 |
| 2 | 66.54 | 68.54 | 65.5 FZR1_FlexIII | 99.0 KLSMLEGHTAR             | Label: 13C(6)15N(2)(K) @ 1; Label: 13C(6)15N(4)(R) @ 11                             | missed K-L @ 1                 | 0.00044176  | 1259.67786 | 420.8999 | 1259.67749 | 420.89978  | 3 | 11 | 14.6934 | 12.66 |
| 2 | 66.54 | 68.54 | 65.5 FZR1_FlexIII | 99.0 LCDLSVEGDSYTSVGWSER     | Propionamide(C) @ 2; Label: 13C(6)15N(4)(R) @ 19                                    |                                | 0.0104608   | 2118.98731 | 1060.501 | 2118.97681 | 1060.49561 | 2 | 23 | 18.1428 | 12.66 |
| 2 | 66.54 | 68.54 | 65.5 FZR1_FlexIII | 99.0 LLVWNHSSLSPVQQYTEHLAAVK | Label: 13C(6)15N(2)(K) @ 23                                                         |                                | -0.0026148  | 2627.39502 | 657.856  | 2627.39502 | 657.856079 | 4 | 15 | 18.5316 | 12.66 |
| 2 | 66.54 | 68.54 | 65.5 FZR1_FlexIII | 99.0 LQGHQRVECVLK            | Label: 13C(6)15N(4)(R) @ 5; Propionamide(C) @ 9; Label: 13C(6)15N(2)(K) @ 12        | missed R-Q @ 5                 | -0.00729406 | 1455.76624 | 728.8904 | 1455.77356 | 728.894043 | 2 | 16 | 13.5915 | 12.66 |
| 2 | 66.54 | 68.54 | 65.5 FZR1_FlexIII | 99.0 LSMLEGHTAR              | Label: 13C(6)15N(4)(R) @ 10                                                         |                                | -0.00083313 | 1123.56751 | 562.791  | 1123.56836 | 562.791443 | 2 | 12 | 15.2066 | 12.66 |
| 2 | 66.54 | 68.54 | 65.5 FZR1_FlexIII | 99.0 NELLGAGIEK              | Label: 13C(6)15N(2)(K) @ 10                                                         |                                | 0.00552196  | 1050.58545 | 526.3    | 1050.58008 | 526.297302 | 2 | 11 | 16.6001 | 12.66 |
| 2 | 66.54 | 68.54 | 65.5 FZR1_FlexIII | 99.0 QIVIONENTMPR            | Gln->pyro-Glu @ N-term; Label: 13C(6)15N(4)(R) @ 12                                 |                                | -0.0103165  | 1434.7063  | 718.3604 | 1434.71643 | 718.36554  | 2 | 14 | 17.7197 | 12.66 |
| 2 | 66.54 | 68.54 | 65.5 FZR1_FlexIII | 99.0 RLQPSTPEKK              | Label: 13C(6)15N(4)(R) @ 1; Label: 13C(6)15N(2)(K) @ 9; Label: 13C(6)15N(2)(K) @ 10 | missed R-L @ 1; missed K-K @ 9 | -0.00083251 | 1208.70789 | 403.9099 | 1208.70874 | 403.910187 | 3 | 11 | 8.2623  | 12.66 |
| 2 | 66.54 | 68.54 | 65.5 FZR1_FlexIII | 99.0 RLTLPASSPVSSPSK         | Label: 13C(6)15N(4)(R) @ 1; Label: 13C(6)15N(2)(K) @ 15                             | missed R-T @ 1                 | -0.00620123 | 1531.82629 | 766.9204 | 1531.83252 | 766.923523 | 2 | 17 | 14.457  | 12.66 |
| 2 | 66.54 | 68.54 | 65.5 FZR1_FlexIII | 99.0 SSPDDGNDVSPYSLSPVSNK    | Label: 13C(6)15N(2)(K) @ 20                                                         |                                | 0.00451376  | 2071.94727 | 1036.981 | 2071.94263 | 1036.97852 | 2 | 20 | 16.8036 | 12.66 |
| 2 | 66.54 | 68.54 | 65.5 FZR1_FlexIII | 99.0 STKESVSVLNLFTTR         | Label: 13C(6)15N(2)(K) @ 3; Label: 13C(6)15N(4)(R) @ 14                             | missed K-E @ 3                 | 0.00016758  | 1597.87964 | 799.9471 | 1597.8794  | 799.947022 | 2 | 19 | 19.0231 | 12.66 |
| 2 | 66.54 | 68.54 | 65.5 FZR1_FlexIII | 99.0 TLTTPASSPVSSPSK         | Label: 13C(6)15N(2)(K) @ 14                                                         |                                | -0.00082335 | 1365.72229 | 683.8684 | 1365.72315 | 683.868835 | 2 | 14 | 15.2635 | 12.66 |
| 2 | 66.54 | 68.54 | 65.5 FZR1_FlexIII | 99.0 VGALAWNAEQLSSGSR        |                                                                                     |                                | -0.0155498  | 1644.80652 | 823.4105 | 1644.82202 | 823.418274 | 2 | 18 | 17.8663 | 12.66 |
| 2 | 66.54 | 68.54 | 65.5 FZR1_FlexIII | 99.0 VLYLAMPDGEAIVTAGDETLR   | Label: 13C(6)15N(4)(R) @ 23                                                         |                                | 9.79E-05    | 2387.1919  | 796.7379 | 2387.1919  | 796.737854 | 3 | 20 | 19.2217 | 12.66 |
| 2 | 66.54 | 68.54 | 65.5 FZR1_FlexIII | 99.0 WSTDHQLLASGGNDNK        | Label: 13C(6)15N(2)(K) @ 16                                                         |                                | -0.00958846 | 1749.80664 | 875.9106 | 1749.81616 | 875.915344 | 2 | 26 | 15.789  | 12.66 |
| 2 | 66.54 | 68.54 | 65.5 FZR1_FlexIII | 99.0 YPSLTQVAK               | Label: 13C(6)15N(2)(K) @ 9                                                          |                                | -0.00091981 | 1013.56287 | 507.7887 | 1013.56372 | 507.789124 | 2 | 10 | 16.6615 | 12.66 |
| 2 | 66.54 | 68.54 | 65.5 FZR1_FlexIII | 99.0 AGANWVSVNFHR            | Label: 13C(6)15N(4)(R) @ 11                                                         |                                | -0.00264037 | 1267.60584 | 634.8102 | 1267.60852 | 634.811585 | 2 | 13 | 16.887  | 12.66 |
| 2 | 66.54 | 68.54 | 65.5 FZR1_FlexIII | 99.0 AGANWVSVNFHR            | Label: 13C(6)15N(4)(R) @ 11                                                         |                                | -0.00067839 | 1267.60779 | 423.5432 | 1267.60852 | 423.543457 | 3 | 11 | 16.6048 | 12.66 |
| 2 | 66.54 | 68.54 | 65.5 FZR1_FlexIII | 99.0 AIAWSPHQHGLLASGGGTADR   | Label: 13C(6)15N(4)(R) @ 21                                                         |                                | 0.00041481  | 2111.0542  | 528.7708 | 2111.05371 | 528.770691 | 4 | 15 | 16.3738 | 12.66 |
| 2 | 66.54 | 68.54 | 65.5 FZR1_FlexIII | 99.0 AIAWSPHQHGLLASGGGTADR   | Label: 13C(6)15N(4)(R) @ 21                                                         |                                | -0.00227074 | 2111.05127 | 528.7701 | 2111.05371 | 528.770691 | 4 | 16 | 16.636  | 12.66 |
| 2 | 66.54 | 68.54 | 65.5 FZR1_FlexIII | 99.0 DATSDNGKDLAYSALLK       | Label: 13C(6)15N(2)(K) @ 8; Label: 13C(6)15N(2)(K) @ 18                             | missed K-D @ 8                 | 0.0146363   | 1853.94873 | 618.9902 | 1853.9342  | 618.985352 | 3 | 15 | 17.6258 | 12.66 |
| 2 | 66.54 | 68.54 | 65.5 FZR1_FlexIII | 99.0 DATSDNGKDLAYSALLK       | Deamidated(N) @ 6; Label: 13C(6)15N(2)(K) @ 8; Label: 13C(6)15N(2)(K) @ 18          | missed K-D @ 8                 | -0.00935591 | 1854.90869 | 619.3102 | 1854.91821 | 619.313555 | 3 | 15 | 17.8635 | 12.66 |
| 2 | 66.54 | 68.54 | 65.5 FZR1_FlexIII | 99.0 DATSDNGKDLAYSALLK       | Deamidated(N) @ 6; Label: 13C(6)15N(2)(K) @ 8; Label: 13C(6)15N(2)(K) @ 18          | missed K-D @ 8                 | 0.00854909  | 1854.92664 | 928.4706 | 1854.91821 | 928.46637  | 2 | 21 | 17.9077 | 12.66 |
| 2 | 66.54 | 68.54 | 65.5 FZR1_FlexIII | 99.0 ESVSVLNLFTTR            | Label: 13C(6)15N(4)(R) @ 11                                                         |                                | -0.00223231 | 1273.68823 | 637.8514 | 1273.69055 | 637.852539 | 2 | 13 | 19.8812 | 12.66 |
| 2 | 66.54 | 68.54 | 65.5 FZR1_FlexIII | 99.0 ESVSVLNLFTTR            | Label: 13C(6)15N(4)(R) @ 11                                                         |                                | -0.00467372 | 1273.68591 | 637.8502 | 1273.69055 | 637.852539 | 2 | 12 | 20.1592 | 12.66 |
| 2 | 66.54 | 68.54 | 65.5 FZR1_FlexIII | 99.0 GFVQIWDAAAGKK           | Label: 13C(6)15N(2)(K) @ 12; Label: 13C(6)15N(2)(K) @ 13                            | missed K-K @ 12                | -0.0148602  | 1405.76733 | 469.5964 | 1405.76892 | 469.596893 | 3 | 11 | 18.5289 | 12.66 |
| 2 | 66.54 | 68.54 | 65.5 FZR1_FlexIII | 99.0 IRYPTFLYK               | Label: 13C(6)15N(4)(R) @ 2; Label: 13C(6)15N(2)(K) @ 9                              | missed R-Y @ 2                 | -0.00693311 | 1217.68591 | 609.8502 | 1217.69275 | 609.853638 | 2 | 11 | 17.6713 | 12.66 |
| 2 | 66.54 | 68.54 | 65.5 FZR1_FlexIII | 99.0 LLVWNHSSLSPVQQYTEHLAAVK | Deamidated(Q) @ 14; Label: 13C(6)15N(2)(K) @ 23                                     |                                | 0.020873    | 2628.40015 | 877.1406 | 2628.37915 | 877.133667 | 3 | 19 | 18.5366 | 12.66 |
| 2 | 66.54 | 68.54 | 65.5 FZR1_FlexIII | 99.0 LLVWNHSSLSPVQQYTEHLAAVK | Deamidated(Q) @ 14; Label: 13C(6)15N(2)(K) @ 23                                     |                                | 0.020873    | 2628.40015 | 877.1406 | 2628.37915 | 877.133667 | 3 | 16 | 18.8163 | 12.66 |
| 2 | 66.54 | 68.54 | 65.5 FZR1_FlexIII | 99.0 LLVWNHSSLSPVQQYTEHLAAVK | Label: 13C(6)15N(2)(K) @ 23                                                         |                                | -0.0197046  | 2627.39331 | 657.8556 | 2627.39502 | 657.850679 | 4 | 13 | 18.8141 | 12.66 |
| 2 | 66.54 | 68.54 | 65.5 FZR1_FlexIII | 99.0 LSMLEGHTAR              | Label: 13C(6)15N(4)(R) @ 10                                                         |                                | -0.00058014 | 1123.56787 | 375.5299 | 1123.56836 | 375.53006  | 3 | 10 | 15.1625 | 12.66 |
| 2 | 66.54 | 68.54 | 65.5 FZR1_FlexIII | 99.0 NELLGAGIEK              | Label: 13C(6)15N(2)(K) @ 10                                                         |                                | -0.00021535 | 1050.57983 | 526.2972 | 1050.58008 | 526.297302 | 2 | 11 | 16.8659 | 12.66 |
| 2 | 66.54 | 68.54 | 65.5 FZR1_FlexIII | 99.0 QIVIONENTMPR            |                                                                                     |                                | 0.0114526   | 1441.74622 | 721.8804 | 1441.73474 | 721.874634 | 2 | 14 | 16.2565 | 12.66 |
| 2 | 66.54 | 68.54 | 65.5 FZR1_FlexIII | 99.0 QIVIONENTMPR            | Label: 13C(6)15N(4)(R) @ 12                                                         |                                | 0.00063481  | 1451.74365 | 726.8791 | 1451.74304 | 726.878784 | 2 | 13 | 16.1385 | 12.66 |
| 2 | 66.54 | 68.54 | 65.5 FZR1_FlexIII | 99.0 QIVIONENTMPR            | Deamidated(N) @ 6; Label: 13C(6)15N(4)(R) @ 12                                      |                                | 0.0191842   | 1452.74622 | 727.3804 | 1452.72705 | 727.370789 | 2 | 12 | 16.4063 | 12.66 |
| 2 | 66.54 | 68.54 | 65.5 FZR1_FlexIII | 99.0 RLTLPASSPVSSPSK         | Label: 13C(6)15N(4)(R) @ 1; Label: 13C(6)15N(2)(K) @ 15                             | missed R-T @ 1                 | -0.00100438 | 1531.83154 | 511.6178 | 1531.83252 | 511.618103 | 3 | 16 | 14.4381 | 12.66 |
| 2 | 66.54 | 68.54 | 65.5 FZR1_FlexIII | 99.0 RLTLPASSPVSSPSK         | Label: 13C(6)15N(4)(R) @ 1; Label: 13C(6)15N(2)(K) @ 15                             | missed R-T @ 1                 | 0.00586208  | 1531.83838 | 511.6201 | 1531.83252 | 511.618103 | 3 | 15 | 14.7053 | 12.66 |
| 2 | 66.54 | 68.54 | 65.5 FZR1_FlexIII | 99.0 SSPDDGNDVSPYSLSPVSNK    | Deamidated(N) @ 7; Label: 13C(6)15N(2)(K) @ 20                                      |                                | 0.0204996   | 2072.94727 | 1037.481 | 2072.92651 | 1037.47058 | 2 | 17 | 17.0786 | 12.66 |
| 2 | 66.54 | 68.54 | 65.5 FZR1_FlexIII | 99.0 TLTTPASSPVSSPSK         | Label: 13C(6)15N(2)(K) @ 14                                                         |                                | 0.00052828  | 1365.72363 | 456.2485 | 1365.72315 | 456.248322 | 3 | 13 | 14.2963 | 12.66 |
| 2 | 66.54 | 68.54 | 65.5 FZR1_FlexIII | 99.0 TLTTPASSPVSSPSK         | Label: 13C(6)15N(2)(K) @ 14                                                         |                                | -0.00204405 | 1365.72107 | 683.8678 | 1365.72315 | 683.868835 | 2 | 12 | 14.9849 | 12.66 |
| 2 | 66.54 | 68.54 | 65.5 FZR1_FlexIII | 99.0 TLTTPASSPVSSPSK         | Label: 13C(6)15N(2)(K) @ 14                                                         |                                | 0.00296084  | 1365.72607 | 683.8703 | 1365.72315 | 683.868835 | 2 | 11 | 15.539  | 12.66 |
| 2 | 66.54 | 68.54 | 65.5 FZR1_FlexIII | 99.0 VGALAWNAEQLSSGSR        | Label: 13C(6)15N(4)(R) @ 16                                                         |                                | 0.00498286  | 1654.83521 | 552.619  | 1654.8302  | 552.617371 | 3 | 14 | 17.3645 | 12.66 |
| 2 | 66.54 | 68.54 | 65.5 FZR1_FlexIII | 99.0 VGALAWNAEQLSSGSR        | Label: 13C(6)15N(4)(R) @ 16                                                         |                                | -0.00390662 | 1654.82642 | 828.4205 | 1654.8302  | 828.422424 | 2 | 22 | 17.7833 | 12.66 |
| 2 | 66.54 | 68.54 | 65.5 FZR1_FlexIII | 99.0 VGALAWNAEQLSSGSR        | Label: 13C(6)15N(4)(R) @ 16                                                         |                                | -0.00378455 | 1654.82642 | 828.4205 | 1654.8302  | 828.422424 | 2 | 20 | 18.0552 | 12.66 |
| 2 | 66.54 | 68.54 | 65.5 FZR1_FlexIII | 99.0 VGALAWNAEQLSSGSR        | Label: 13C(6)15N(4)(R) @ 16                                                         |                                | -0.00378455 | 1654.82642 | 828.4205 | 1654.8302  | 828.422424 | 2 | 15 | 20.9252 | 12.66 |
| 2 | 66.54 | 68.54 | 65.5 FZR1_FlexIII | 99.0 VGALAWNAEQLSSGSR        | Label: 13C(6)15N(4)(R) @ 16                                                         |                                | -0.00378455 | 1654.82642 | 828.4205 | 1654.8302  | 828.422424 | 2 | 14 | 21.5341 | 12.66 |
| 2 | 66.54 | 68.54 | 65.5 FZR1_FlexIII | 99.0 VGALAWNAEQLSSGSR        | Label: 13C(6)15N(4)(R) @ 16                                                         |                                | -0.00378455 | 1654.82642 | 828.4205 | 1654.8302  | 828.422424 | 2 | 14 | 26.4922 | 12.66 |
| 2 | 66.54 | 68.54 | 65.5 FZR1_FlexIII | 99.0 VGALAWNAEQLSSGSR        | Label: 13C(6)15N(4)(R) @ 16                                                         |                                | -0.00378455 | 1654.82642 | 828.4205 | 1654.8302  | 828.422424 | 2 | 13 | 19.981  | 12.66 |
| 2 | 66.54 | 68.54 | 65.5 FZR1_FlexIII | 99.0 VGALAWNAEQLSSGSR        | Label: 13C(6)15N(4)(R) @ 16                                                         |                                | -0.00378455 | 1654.82642 | 828.4205 | 1654.8302  | 828.422424 | 2 | 13 | 20.3284 | 12.66 |
| 2 | 66.54 | 68.54 | 65.5 FZR1_FlexIII | 99.0 VGALAWNAEQLSSGSR        | Label: 13C(6)15N(4)(R) @ 16                                                         |                                | -0.00378455 | 1654.82642 | 828.4205 | 1654.8302  | 828.422424 | 2 | 13 | 21.2118 | 12.66 |
| 2 | 66.54 | 68.54 | 65.5 FZR1_FlexIII | 99.0 VGALAWNAEQLSSGSR        | Label: 13C(6)15N(4)(R) @ 16                                                         |                                | -0.00378455 | 1654.82642 | 828.4205 | 1654.8302  | 828.422424 | 2 | 11 | 21.8706 | 12.66 |
| 2 | 66.54 | 68.54 | 65.5 FZR1_FlexIII | 99.0 WSTDHQLLASGGNDNK        | Label: 13C(6)15N(2)(K) @ 16                                                         |                                | 3.34E-05    | 1749.81641 | 584.2794 | 1749.81616 | 584.279358 | 3 | 16 | 15.7736 | 12.66 |
| 2 | 66.54 | 68.54 | 65.5 FZR1_FlexIII | 99.0 WSTDHQLLASGGNDNK        | Deamidated(N) @ 13; Label: 13C(6)15N(2)(K) @ 16                                     |                                | 0.00332399  | 1750.80371 | 584.6085 | 1750.80017 | 584.607361 | 3 | 15 | 16.0435 | 12.66 |
| 2 | 66.54 | 68.54 | 65.5 FZR1_FlexIII | 99.0 WSTDHQLLASGGNDNK        | Deamidated(N) @ 15; Label: 13C(6)15N(2)(K) @ 16                                     |                                | 0.00639742  | 1750.80664 | 876.4106 | 1750.80017 | 876.407349 | 2 | 21 | 16.0457 | 12.66 |
| 2 | 66.54 | 68.54 | 65.5 FZR1_FlexIII | 99.0 YPTFLYK                 | Label: 13C(6)15N(2)(K) @ 7                                                          |                                | -0.00165037 | 938.497681 | 470.2561 | 938.499329 | 470.256928 | 2 | 9  | 18.0092 | 12.66 |
| 2 | 66.54 | 68.54 | 65.5 FZR1_FlexIII | 99.0 YPTFLYK                 | Label: 13C(6)15N(2)(K) @ 7                                                          |                                | 0.00020099  | 938.499451 | 470.257  | 938.499329 | 470.256928 | 2 | 9  | 17.9008 | 12.66 |
| 2 | 66.54 | 68.54 | 65.5 FZR1_FlexIII | 99.0 YPTFLYK                 | Label: 13C(6)15N(2)(K) @ 7                                                          |                                | -0.00091407 | 938.498474 |          |            |            |   |    |         |       |

|   |       |       |                     |                                                          |                                                                                                                                                    |                            |              |            |          |            |            |   |    |         |       |
|---|-------|-------|---------------------|----------------------------------------------------------|----------------------------------------------------------------------------------------------------------------------------------------------------|----------------------------|--------------|------------|----------|------------|------------|---|----|---------|-------|
| 3 | 63.81 | 65.81 | 53.9 XIAP_FlexIII   | 99.0 EISTEEQLR                                           | Label: 13C(6)15N(4)(R)@9                                                                                                                           |                            | 0.00214318   | 1113.55627 | 557.7854 | 1113.55408 | 557.784363 | 2 | 10 | 14.9245 | 2.38  |
| 3 | 63.81 | 65.81 | 53.9 XIAP_FlexIII   | 99.0 EISTEEQLRR                                          | Label: 13C(6)15N(4)(R)@9; Label: 13C(6)15N(4)(R)@10                                                                                                | missed R-R@9               | 0.00317765   | 1279.66663 | 640.8406 | 1279.66357 | 640.83905  | 2 | 11 | 14.2934 | 2.38  |
| 3 | 63.81 | 65.81 | 53.9 XIAP_FlexIII   | 99.0 ELASAGLYYTIGDQVQCFCGCGK                             | Propionamide(C)@18; Propionamide(C)@20; Propionamide(C)@21; Label: 13C(6)15N(2)(K)@24                                                              |                            | -0.00198799  | 2703.22022 | 902.0807 | 2703.22217 | 902.08136  | 3 | 19 | 18.7856 | 2.38  |
| 3 | 63.81 | 65.81 | 53.9 XIAP_FlexIII   | 99.0 GQEYINNIHLTSLSEELVR                                 | Propionamide(C)@17; Label: 13C(6)15N(4)(R)@20                                                                                                      |                            | 0.00992301   | 2448.21924 | 817.0804 | 2448.20947 | 817.077087 | 3 | 13 | 18.0474 | 2.38  |
| 3 | 63.81 | 65.81 | 53.9 XIAP_FlexIII   | 99.0 HFPNCFVILGR                                         | Propionamide(C)@5; Label: 13C(6)15N(4)(R)@11                                                                                                       |                            | -0.00028207  | 1416.69983 | 709.3572 | 1416.70007 | 709.3573   | 2 | 10 | 18.878  | 2.38  |
| 3 | 63.81 | 65.81 | 53.9 XIAP_FlexIII   | 99.0 IFMSYPTFLYK                                         | Label: 13C(6)15N(2)(K)@11                                                                                                                          |                            | -0.00440595  | 1416.71985 | 709.3672 | 1416.72424 | 709.369446 | 2 | 13 | 19.6498 | 2.38  |
| 3 | 63.81 | 65.81 | 53.9 XIAP_FlexIII   | 99.0 IFTFGTWIYSVNK                                       | Label: 13C(6)15N(2)(K)@13                                                                                                                          |                            | 0.00400962   | 1582.83142 | 792.423  | 1582.82752 | 792.421021 | 2 | 15 | 20.2721 | 2.38  |
| 3 | 63.81 | 65.81 | 53.9 XIAP_FlexIII   | 99.0 IFTFGTWIYSVNKEQLAR                                  | Deamidated(N)@12; Label: 13C(6)15N(2)(K)@13; Label: 13C(6)15N(4)(R)@18                                                                             | missed K-E@13              | 0.0064493    | 2191.14966 | 731.3905 | 2191.14331 | 731.388367 | 3 | 11 | 20.1774 | 2.38  |
| 3 | 63.81 | 65.81 | 53.9 XIAP_FlexIII   | 99.0 LKNWPCDOR                                           | Label: 13C(6)15N(2)(K)@2; Propionamide(C)@7; Label: 13C(6)15N(4)(R)@9                                                                              | missed K-N@2               | 0.00125598   | 1248.60523 | 417.209  | 1248.604   | 417.208618 | 3 | 9  | 15.1568 | 2.38  |
| 3 | 63.81 | 65.81 | 53.9 XIAP_FlexIII   | 99.0 LKSFQNWPDYAHLTR                                     | Label: 13C(6)15N(2)(K)@2; Label: 13C(6)15N(4)(R)@16                                                                                                | missed K-S@2               | -0.00405751  | 1990.01416 | 498.5108 | 1990.01794 | 498.51178  | 4 | 11 | 17.6876 | 2.38  |
| 3 | 63.81 | 65.81 | 53.9 XIAP_FlexIII   | 99.0 NFPNSTNLPR                                          | Label: 13C(6)15N(4)(R)@10                                                                                                                          |                            | 0.00127405   | 1168.58765 | 585.3011 | 1168.58643 | 585.300476 | 2 | 10 | 16.1829 | 2.38  |
| 3 | 63.81 | 65.81 | 53.9 XIAP_FlexIII   | 99.0 NIAIVFPCGHLVTCK                                     | Propionamide(C)@9; Propionamide(C)@15; Label: 13C(6)15N(2)(K)@16                                                                                   |                            | 0.00052318   | 1862.99963 | 932.5071 | 1862.99902 | 932.506775 | 2 | 16 | 18.5756 | 2.38  |
| 3 | 63.81 | 65.81 | 53.9 XIAP_FlexIII   | 99.0 NPSMADYEAR                                          | Label: 13C(6)15N(4)(R)@10                                                                                                                          |                            | 7.17E-05     | 1162.49524 | 582.2549 | 1162.49524 | 582.254883 | 2 | 10 | 15.2041 | 2.38  |
| 3 | 63.81 | 65.81 | 53.9 XIAP_FlexIII   | 99.0 QCAEAVDKCPMCYTVITFK                                 | Gln->pyro-Glu@N-term; Propionamide(C)@2; Label: 13C(6)15N(2)(K)@8; Propionamide(C)@9; Propionamide(C)@12; Label: 13C(6)15N(4)(R)@13                | missed K-C@8               | -0.00194347  | 2361.08325 | 1181.549 | 2361.08472 | 1181.54968 | 2 | 20 | 18.8373 | 2.38  |
| 3 | 63.81 | 65.81 | 53.9 XIAP_FlexIII   | 99.0 RIDDTIFQNPWQAEIR                                    | Label: 13C(6)15N(4)(R)@1; Label: 13C(6)15N(4)(R)@17                                                                                                | missed R-I@1               | 0.00681065   | 2065.05957 | 689.3605 | 2065.05298 | 689.358276 | 3 | 15 | 19.0238 | 2.38  |
| 3 | 63.81 | 65.81 | 53.9 XIAP_FlexIII   | 99.0 SESDAVSSDRNFPNSTNLPR                                | Label: 13C(6)15N(4)(R)@10; Label: 13C(6)15N(4)(R)@20                                                                                               | missed R-N@10              | 0.00362774   | 2212.02979 | 738.3505 | 2212.02588 | 738.349243 | 3 | 16 | 16.01   | 2.38  |
| 3 | 63.81 | 65.81 | 53.9 XIAP_FlexIII   | 99.0 SFQNWPDYAHLTR                                       | Label: 13C(6)15N(4)(R)@14                                                                                                                          |                            | -0.00452917  | 1740.82031 | 581.2807 | 1740.82483 | 581.282227 | 3 | 11 | 17.925  | 2.38  |
| 3 | 63.81 | 65.81 | 53.9 XIAP_FlexIII   | 99.0 SLEVLADLVNAOK                                       | Label: 13C(6)15N(2)(K)@14                                                                                                                          |                            | 0.0119406    | 1505.86646 | 753.9405 | 1505.85449 | 753.934509 | 2 | 18 | 20.3767 | 2.38  |
| 3 | 63.81 | 65.81 | 53.9 XIAP_FlexIII   | 99.0 SLEVLADLVNAOKDSMQDESSQTSLSQK                        | Label: 13C(6)15N(2)(K)@14; Label: 13C(6)15N(2)(K)@28                                                                                               | missed K-D@14              | -0.0173156   | 3078.51831 | 1027.18  | 3078.53613 | 1027.18604 | 3 | 21 | 20.281  | 2.38  |
| 3 | 63.81 | 65.81 | 53.9 XIAP_FlexIII   | 99.0 TCVPADINKEEFVEEFNR                                  | Propionamide(C)@2; Label: 13C(6)15N(2)(K)@9; Label: 13C(6)15N(4)(R)@19                                                                             | missed K-E@9               | 0.0131044    | 2357.10938 | 786.7104 | 2357.09644 | 786.706116 | 3 | 15 | 18.4351 | 2.38  |
| 3 | 63.81 | 65.81 | 53.9 XIAP_FlexIII   | 99.0 TFANFPSPGSPVSASTLAR                                 | Deamidated(N)@4                                                                                                                                    |                            | 0.0163774    | 1809.90613 | 905.9603 | 1809.88977 | 905.952148 | 2 | 13 | 18.136  | 2.38  |
| 3 | 63.81 | 65.81 | 53.9 XIAP_FlexIII   | 99.0 TQGVVDISDTIYPR                                      | Label: 13C(6)15N(4)(R)@14                                                                                                                          |                            | 0.0013975    | 1572.80371 | 787.4091 | 1572.80225 | 787.408447 | 2 | 17 | 17.6614 | 2.38  |
| 3 | 63.81 | 65.81 | 53.9 XIAP_FlexIII   | 99.0 VENYLGSR                                            | Label: 13C(6)15N(4)(R)@8                                                                                                                           |                            | -0.00777945  | 946.467102 | 474.2408 | 946.474793 | 474.244659 | 2 | 10 | 15.2288 | 2.38  |
| 3 | 63.81 | 65.81 | 53.9 XIAP_FlexIII   | 99.0 CPSCHAAVDR                                          | Propionamide(C)@1; Propionamide(C)@4; Label: 13C(6)15N(4)(R)@10                                                                                    |                            | 0.00331806   | 1259.54468 | 420.8555 | 1259.54415 | 420.854431 | 3 | 12 | 14.2215 | 2.38  |
| 3 | 63.81 | 65.81 | 53.9 XIAP_FlexIII   | 99.0 DHFALDRPSETHADYLLR                                  | Label: 13C(6)15N(4)(R)@7; Label: 13C(6)15N(4)(R)@18                                                                                                |                            | 0.00856592   | 2175.06982 | 726.0305 | 2175.06128 | 726.027649 | 3 | 15 | 16.7484 | 2.38  |
| 3 | 63.81 | 65.81 | 53.9 XIAP_FlexIII   | 99.0 DHFALDRPSETHADYLLR                                  | Label: 13C(6)15N(4)(R)@7; Label: 13C(6)15N(4)(R)@18                                                                                                |                            | -0.00742538  | 2175.05371 | 544.7707 | 2175.06128 | 544.772583 | 4 | 12 | 16.7249 | 2.38  |
| 3 | 63.81 | 65.81 | 53.9 XIAP_FlexIII   | 99.0 DHFALDRPSETHADYLLR                                  | Label: 13C(6)15N(4)(R)@7; Label: 13C(6)15N(4)(R)@18                                                                                                |                            | -0.00742538  | 2175.05371 | 544.7707 | 2175.06128 | 544.772583 | 4 | 10 | 16.9904 | 2.38  |
| 3 | 63.81 | 65.81 | 53.9 XIAP_FlexIII   | 99.0 ELASAGLYYTIGDQVQCFCGCGK                             | Deamidated(Q)@15; Propionamide(C)@18; Propionamide(C)@20; Propionamide(C)@21; Label: 13C(6)15N(2)(K)@24                                            |                            | 0.0188172    | 2704.22534 | 1353.12  | 2704.2063  | 1353.11035 | 2 | 14 | 18.7987 | 2.38  |
| 3 | 63.81 | 65.81 | 53.9 XIAP_FlexIII   | 99.0 IFTFGTWIYSVNKEQLAR                                  | Label: 13C(6)15N(2)(K)@13; Label: 13C(6)15N(4)(R)@18                                                                                               | missed K-E@13              | 0.00049517   | 2190.15967 | 731.0605 | 2190.15918 | 731.060364 | 3 | 14 | 19.9405 | 2.38  |
| 3 | 63.81 | 65.81 | 53.9 XIAP_FlexIII   | 99.0 NFPNSTNLPR                                          | Label: 13C(6)15N(4)(R)@10                                                                                                                          |                            | 0.00176233   | 1168.58826 | 585.3014 | 1168.58643 | 585.300476 | 2 | 10 | 16.441  | 2.38  |
| 3 | 63.81 | 65.81 | 53.9 XIAP_FlexIII   | 99.0 NIAIVFPCGHLVTCK                                     | Propionamide(C)@9; Propionamide(C)@15; Label: 13C(6)15N(2)(K)@16                                                                                   |                            | 0.00204995   | 1863.0011  | 622.0076 | 1862.99902 | 622.006958 | 3 | 14 | 18.5718 | 2.38  |
| 3 | 63.81 | 65.81 | 53.9 XIAP_FlexIII   | 99.0 NPSMADYEAR                                          | Label: 13C(6)15N(4)(R)@10                                                                                                                          |                            | 0.0115463    | 1162.50684 | 582.2607 | 1162.49524 | 582.254883 | 2 | 10 | 15.4752 | 2.38  |
| 3 | 63.81 | 65.81 | 53.9 XIAP_FlexIII   | 99.0 SESDAVSSDRNFPNSTNLPR                                | Label: 13C(6)15N(4)(R)@10; Deamidated(N)@14; Label: 13C(6)15N(4)(R)@20                                                                             | missed R-N@10              | 0.00966235   | 2213.01953 | 738.6805 | 2213.01001 | 738.677246 | 3 | 11 | 16.2783 | 2.38  |
| 3 | 63.81 | 65.81 | 53.9 XIAP_FlexIII   | 99.0 SLEVLADLVNAOKDSMQDESSQTSLSQK                        | Deamidated(N)@11; Label: 13C(6)15N(2)(K)@14; Label: 13C(6)15N(2)(K)@28                                                                             | missed K-D@14              | 0.0125836    | 3079.53247 | 170.8904 | 3079.52026 | 770.887329 | 4 | 11 | 20.3547 | 2.38  |
| 3 | 63.81 | 65.81 | 53.9 XIAP_FlexIII   | 99.0 TCVPADINKEEFVEEFNR                                  | Propionamide(C)@2; Deamidated(N)@8; Label: 13C(6)15N(2)(K)@9; Label: 13C(6)15N(4)(R)@19                                                            | missed K-E@9               | 0.005010102  | 2358.08545 | 1180.05  | 2358.08057 | 1180.04749 | 2 | 16 | 18.4614 | 2.38  |
| 3 | 63.81 | 65.81 | 53.9 XIAP_FlexIII   | 99.0 TCVPADINKEEFVEEFNR                                  | Propionamide(C)@2; Deamidated(N)@8; Label: 13C(6)15N(2)(K)@9; Label: 13C(6)15N(4)(R)@19                                                            | missed K-E@9               | 0.0189559    | 2358.09937 | 787.0404 | 2358.08057 | 787.034119 | 3 | 13 | 18.6935 | 2.38  |
| 3 | 63.81 | 65.81 | 53.9 XIAP_FlexIII   | 99.0 TFANFPSPGSPVSASTLAR                                 | Label: 13C(6)15N(4)(R)@18                                                                                                                          |                            | 0.01201117   | 1818.92603 | 910.4703 | 1818.91394 | 910.464294 | 2 | 17 | 17.9624 | 2.38  |
| 3 | 63.81 | 65.81 | 53.9 XIAP_FlexIII   | 99.0 YPTFLYK                                             | Label: 13C(6)15N(2)(K)@7                                                                                                                           | cleaved S-Y@N-term         | -0.00165037  | 938.497681 | 470.2561 | 938.499329 | 470.256928 | 2 | 9  | 18.0092 | 2.38  |
| 3 | 63.81 | 65.81 | 53.9 XIAP_FlexIII   | 99.0 YPTFLYK                                             | Label: 13C(6)15N(2)(K)@7                                                                                                                           | cleaved S-Y@N-term         | 0.00020099   | 938.49451  | 470.257  | 938.499329 | 470.256928 | 2 | 9  | 17.9008 | 2.38  |
| 3 | 63.81 | 65.81 | 53.9 XIAP_FlexIII   | 99.0 YPTFLYK                                             | Label: 13C(6)15N(2)(K)@7                                                                                                                           | cleaved S-Y@N-term         | -0.00091407  | 938.498474 | 470.2565 | 938.499329 | 470.256928 | 2 | 9  | 17.7612 | 2.38  |
| 4 | 62.05 | 64.05 | 56.1 CDC25C_FlexIII | 99.0 CCLDSLNLSSGEITATQLTTSADLDETGHLDSSGLQEVHLAGMNHQDHLMK | Propionamide(C)@1; Propionamide(C)@2; Deamidated(Q)@36; Label: 13C(6)15N(2)(K)@51                                                                  |                            | -0.0137388   | 5586.56006 | 932.1006 | 5586.57373 | 932.102905 | 6 | 14 | 18.8813 | 33.74 |
| 4 | 62.05 | 64.05 | 56.1 CDC25C_FlexIII | 99.0 CSPAQLCSTPNGLDR                                     | Propionamide(C)@1; Propionamide(C)@8                                                                                                               |                            | -0.000870919 | 1815.85205 | 908.9333 | 1815.86072 | 908.937683 | 2 | 16 | 18.0186 | 33.74 |
| 4 | 62.05 | 64.05 | 56.1 CDC25C_FlexIII | 99.0 DAMCSSANKENDGNGLVDSEMK                              | Propionamide(C)@4; Label: 13C(6)15N(2)(K)@10; Deamidated(N)@14; Label: 13C(6)15N(2)(K)@23                                                          | missed K-E@10              | 0.0136182    | 2546.06738 | 1274.041 | 2546.0542  | 1274.03442 | 2 | 26 | 15.5865 | 33.74 |
| 4 | 62.05 | 64.05 | 56.1 CDC25C_FlexIII | 99.0 DFFPEYVMELCESQSPCMHHQDHK                            | Propionamide(C)@10; Propionamide(C)@16; Label: 13C(6)15N(2)(K)@24                                                                                  |                            | 0.00168362   | 3160.30859 | 791.0844 | 3160.30664 | 791.083984 | 4 | 13 | 18.4832 | 33.74 |
| 4 | 62.05 | 64.05 | 56.1 CDC25C_FlexIII | 99.0 DTSFTVCPDVPDR                                       | Propionamide(C)@7                                                                                                                                  |                            | -0.00387229  | 1406.64612 | 704.3303 | 1406.65002 | 704.332275 | 2 | 14 | 17.2098 | 33.74 |
| 4 | 62.05 | 64.05 | 56.1 CDC25C_FlexIII | 99.0 EEGSSGSGSPFR                                        | Label: 13C(6)15N(4)(R)@12                                                                                                                          |                            | 0.00045787   | 1205.51929 | 603.7669 | 1205.5188  | 603.766663 | 2 | 14 | 14.6096 | 33.74 |
| 4 | 62.05 | 64.05 | 56.1 CDC25C_FlexIII | 99.0 ENDNGNLVDSEMK                                       | Label: 13C(6)15N(2)(K)@13                                                                                                                          |                            | -0.00025259  | 1471.63391 | 736.8242 | 1471.63403 | 736.82428  | 2 | 12 | 15.7253 | 33.74 |
| 4 | 62.05 | 64.05 | 56.1 CDC25C_FlexIII | 99.0 EQALLVK                                             | Label: 13C(6)15N(2)(K)@8                                                                                                                           |                            | 0.00677969   | 920.585449 | 461.3    | 920.578613 | 461.29657  | 2 | 8  | 17.6556 | 33.74 |
| 4 | 62.05 | 64.05 | 56.1 CDC25C_FlexIII | 99.0 FKDNTIPDK                                           | Label: 13C(6)15N(2)(K)@2; Label: 13C(6)15N(2)(K)@9                                                                                                 | missed K-D@2               | 0.0006698    | 1092.57922 | 547.2969 | 1092.57861 | 547.29657  | 2 | 14 | 14.1811 | 33.74 |
| 4 | 62.05 | 64.05 | 56.1 CDC25C_FlexIII | 99.0 FKDNTIPDKVK                                         | Label: 13C(6)15N(2)(K)@2; Label: 13C(6)15N(2)(K)@9; Label: 13C(6)15N(2)(K)@11                                                                      | missed K-D@2; missed K-V@9 | -0.00615287  | 1327.74817 | 443.59   | 1327.75623 | 443.592682 | 3 | 11 | 14.5856 | 33.74 |
| 4 | 62.05 | 64.05 | 56.1 CDC25C_FlexIII | 99.0 FLGDSANLISLGGTPK                                    | Deamidated(N)@7                                                                                                                                    |                            | 0.0243989    | 1676.88672 | 839.4506 | 1676.86206 | 839.438355 | 2 | 13 | 18.7106 | 33.74 |
| 4 | 62.05 | 64.05 | 56.1 CDC25C_FlexIII | 99.0 GGYRDFFFPEYVMELCESQSPCMHHQDHK                       | Label: 13C(6)15N(4)(R)@4; Propionamide(C)@14; Propionamide(C)@20; Label: 13C(6)15N(2)(K)@28                                                        | missed R-D@4               | -0.0247386   | 3603.49756 | 601.5902 | 3603.52246 | 601.59436  | 6 | 15 | 18.2937 | 33.74 |
| 4 | 62.05 | 64.05 | 56.1 CDC25C_FlexIII | 99.0 GGYRDFFFPEYVMELCESQSPCMHHQDHKTELLR                  | Label: 13C(6)15N(4)(R)@4; Propionamide(C)@14; Propionamide(C)@20; Label: 13C(6)15N(2)(K)@28; Label: 13C(6)15N(4)(R)@3; missed R-D@4; missed K-T@28 |                            | -0.0117551   | 4225.87842 | 705.3203 | 4225.89014 | 705.322327 | 6 | 16 | 18.1687 | 33.74 |
| 4 | 62.05 | 64.05 | 56.1 CDC25C_FlexIII | 99.0 IIIVHCEFSSEIR                                       | Propionamide(C)@7; Label: 13C(6)15N(4)(R)@13                                                                                                       |                            | -0.00539918  | 1659.82642 | 830.9205 | 1659.83179 | 830.923218 | 2 | 16 | 18.1644 | 33.74 |
| 4 | 62.05 | 64.05 | 56.1 CDC25C_FlexIII | 99.0 KMLNLLLR                                            | Label: 13C(6)15N(2)(K)@1; Label: 13C(6)15N(4)(R)@9                                                                                                 | missed K-M@1               | -0.00079291  | 1146.69043 | 574.3525 | 1146.69141 | 574.352966 | 2 | 14 | 17.9877 | 33.74 |
| 4 | 62.05 | 64.05 | 56.1 CDC25C_FlexIII | 99.0 KPVIPLDTOK                                          | Label: 13C(6)15N(2)(K)@1; Label: 13C(6)15N(2)(K)@10                                                                                                |                            | 0.00034345   | 1153.70447 | 577.8595 | 1153.7041  | 577.859375 | 2 | 14 | 15.4795 | 33.74 |
| 4 | 62.05 | 64.05 | 56.1 CDC25C_FlexIII | 99.0 KPVIPLDTOKR                                         | Label: 13C(6)15N(2)(K)@1; Label: 13C(6)15N(2)(K)@10; Label: 13C(6)15N(4)(R)@11                                                                     | missed K-R@10              | 7.93E-05     | 1319.81372 | 440.9452 | 1319.81348 | 440.945129 | 3 | 13 |         |       |

|   |       |       |                    |                                                          |                                                                                                                                |                                  |             |            |          |            |            |   |    |         |       |
|---|-------|-------|--------------------|----------------------------------------------------------|--------------------------------------------------------------------------------------------------------------------------------|----------------------------------|-------------|------------|----------|------------|------------|---|----|---------|-------|
| 4 | 62.05 | 64.05 | 56.1 CDC25C_FlexII | 99.0 YVNPETVAALLSGK                                      | Label: 13C(6)15N(2)(K) @ 14                                                                                                    |                                  | -0.00165451 | 1468.80005 | 735.4073 | 1468.80164 | 735.408142 | 2 | 13 | 19.9347 | 33.74 |
| 4 | 62.05 | 64.05 | 56.1 CDC25C_FlexII | 99.0 YVNPETVAALLSGKFQGLIEK                               | Deamidated(N) @ 3; Label: 13C(6)15N(2)(K) @ 14; Label: 13C(6)15N(2)(K) @ 21                                                    | missed K-F @ 14                  | 0.0153525   | 2293.26953 | 765.4304 | 2293.25415 | 765.425293 | 3 | 11 | 20.491  | 33.74 |
| 4 | 62.05 | 64.05 | 56.1 CDC25C_FlexII | 99.0 YVNPETVAALLSGKFQGLIEKFVIDCR                         | Deamidated(N) @ 3; Label: 13C(6)15N(2)(K) @ 14; Label: 13C(6)15N(2)(K) @ 21; Propionamide(C) @ 27; Label: 13C(6)15N(4)(R) @ 29 | missed K-F @ 14; missed K-F @ 21 | 0.0119846   | 3270.73291 | 818.6905 | 3270.72095 | 818.6875   | 4 | 12 | 20.5454 | 33.74 |
| 4 | 62.05 | 64.05 | 56.1 CDC25C_FlexII | 99.0 DFFPEYMELCQPSYCPMHQDHKTELLR                         | Propionamide(C) @ 10; Deamidated(Q) @ 13; Propionamide(C) @ 16; Label: 13C(6)15N(2)(K) @ 24; Label: 13C(6)15N(4)(R) @ 28       | missed K-T @ 24                  | 0.000708572 | 3783.66577 | 757.7404 | 3783.65845 | 757.738953 | 5 | 11 | 18.3688 | 33.74 |
| 4 | 62.05 | 64.05 | 56.1 CDC25C_FlexII | 99.0 CCLDLNLSNLSGEITATQLTTSADLDETHGLDSSGLQEVHLAGMNHQHLMK | Propionamide(C) @ 1; Propionamide(C) @ 2; Deamidated(Q) @ 36; Label: 13C(6)15N(2)(K) @ 51                                      |                                  | -0.0137388  | 5586.56006 | 932.1006 | 5586.57373 | 932.102905 | 6 | 12 | 19.1881 | 33.74 |
| 4 | 62.05 | 64.05 | 56.1 CDC25C_FlexII | 99.0 CCLDLNLSNLSGEITATQLTTSADLDETHGLDSSGLQEVHLAGMNHQHLMK | Propionamide(C) @ 1; Propionamide(C) @ 2; Deamidated(Q) @ 36; Label: 13C(6)15N(2)(K) @ 51                                      |                                  | 0.0463199   | 5586.62061 | 932.1107 | 5586.57373 | 932.102905 | 6 | 12 | 19.1874 | 33.74 |
| 4 | 62.05 | 64.05 | 56.1 CDC25C_FlexII | 99.0 CCLDLNLSNLSGEITATQLTTSADLDETHGLDSSGLQEVHLAGMNHQHLMK | Propionamide(C) @ 1; Propionamide(C) @ 2; Deamidated(Q) @ 36; Label: 13C(6)15N(2)(K) @ 51                                      |                                  | 0.0464729   | 5586.62061 | 932.1107 | 5586.57373 | 932.102905 | 6 | 12 | 18.6852 | 33.74 |
| 4 | 62.05 | 64.05 | 56.1 CDC25C_FlexII | 99.0 CSPAQLLCSTPNGLDR                                    | Propionamide(C) @ 1; Propionamide(C) @ 8; Deamidated(N) @ 12; Label: 13C(6)15N(4)(R) @ 16                                      |                                  | -0.00634919 | 1826.84668 | 914.4306 | 1826.85303 | 914.433777 | 2 | 20 | 17.8558 | 33.74 |
| 4 | 62.05 | 64.05 | 56.1 CDC25C_FlexII | 99.0 CSPAQLLCSTPNGLDR                                    | Propionamide(C) @ 1; Propionamide(C) @ 8; Deamidated(N) @ 12; Label: 13C(6)15N(4)(R) @ 16                                      |                                  | 0.00085297  | 1826.85388 | 914.4342 | 1826.85303 | 914.433777 | 2 | 21 | 17.8688 | 33.74 |
| 4 | 62.05 | 64.05 | 56.1 CDC25C_FlexII | 99.0 CSPAQLLCSTPNGLDR                                    | Propionamide(C) @ 1; Propionamide(C) @ 8; Label: 13C(6)15N(4)(R) @ 16                                                          |                                  | -0.0139791  | 1825.85498 | 609.6256 | 1825.86902 | 609.63031  | 3 | 13 | 17.8986 | 33.74 |
| 4 | 62.05 | 64.05 | 56.1 CDC25C_FlexII | 99.0 CSPAQLLCSTPNGLDR                                    | Propionamide(C) @ 1; Propionamide(C) @ 8; Deamidated(N) @ 12; Label: 13C(6)15N(4)(R) @ 16                                      |                                  | 0.00243989  | 1826.85547 | 914.4335 | 1826.85303 | 914.433777 | 2 | 20 | 18.1259 | 33.74 |
| 4 | 62.05 | 64.05 | 56.1 CDC25C_FlexII | 99.0 CSPAQLLCSTPNGLDR                                    | Propionamide(C) @ 1; Propionamide(C) @ 8; Deamidated(N) @ 12; Label: 13C(6)15N(4)(R) @ 16                                      |                                  | -0.00634919 | 1826.84668 | 914.4306 | 1826.85303 | 914.433777 | 2 | 20 | 18.3859 | 33.74 |
| 4 | 62.05 | 64.05 | 56.1 CDC25C_FlexII | 99.0 CSPAQLLCSTPNGLDR                                    | Propionamide(C) @ 1; Propionamide(C) @ 8; Deamidated(N) @ 12; Label: 13C(6)15N(4)(R) @ 16                                      |                                  | 0.0136704   | 1826.8667  | 914.4406 | 1826.85303 | 914.433777 | 2 | 18 | 20.8453 | 33.74 |
| 4 | 62.05 | 64.05 | 56.1 CDC25C_FlexII | 99.0 CSPAQLLCSTPNGLDR                                    | Propionamide(C) @ 1; Propionamide(C) @ 8; Deamidated(N) @ 12; Label: 13C(6)15N(4)(R) @ 16                                      |                                  | -0.00634919 | 1826.84668 | 914.4306 | 1826.85303 | 914.433777 | 2 | 18 | 21.1841 | 33.74 |
| 4 | 62.05 | 64.05 | 56.1 CDC25C_FlexII | 99.0 CSPAQLLCSTPNGLDR                                    | Propionamide(C) @ 1; Propionamide(C) @ 8; Deamidated(N) @ 12; Label: 13C(6)15N(4)(R) @ 16                                      |                                  | 0.00579096  | 1826.85877 | 609.9602 | 1826.85303 | 609.958313 | 3 | 12 | 21.3058 | 33.74 |
| 4 | 62.05 | 64.05 | 56.1 CDC25C_FlexII | 99.0 CSPAQLLCSTPNGLDR                                    | Propionamide(C) @ 1; Propionamide(C) @ 8; Deamidated(N) @ 12; Label: 13C(6)15N(4)(R) @ 16                                      |                                  | 0.0136704   | 1826.8667  | 914.4406 | 1826.85303 | 914.433777 | 2 | 16 | 21.5403 | 33.74 |
| 4 | 62.05 | 64.05 | 56.1 CDC25C_FlexII | 99.0 CSPAQLLCSTPNGLDR                                    | Propionamide(C) @ 1; Propionamide(C) @ 8; Deamidated(N) @ 12; Label: 13C(6)15N(4)(R) @ 16                                      |                                  | -0.00634919 | 1826.84668 | 914.4306 | 1826.85303 | 914.433777 | 2 | 18 | 21.798  | 33.74 |
| 4 | 62.05 | 64.05 | 56.1 CDC25C_FlexII | 99.0 CSPAQLLCSTPNGLDR                                    | Propionamide(C) @ 1; Propionamide(C) @ 8; Deamidated(N) @ 12; Label: 13C(6)15N(4)(R) @ 16                                      |                                  | -0.00634919 | 1826.84668 | 914.4306 | 1826.85303 | 914.433777 | 2 | 15 | 24.6092 | 33.74 |
| 4 | 62.05 | 64.05 | 56.1 CDC25C_FlexII | 99.0 CSPAQLLCSTPNGLDR                                    | Propionamide(C) @ 1; Propionamide(C) @ 8; Deamidated(N) @ 12; Label: 13C(6)15N(4)(R) @ 16                                      |                                  | 0.00585786  | 1826.85889 | 914.4367 | 1826.85303 | 914.433777 | 2 | 15 | 26.6515 | 33.74 |
| 4 | 62.05 | 64.05 | 56.1 CDC25C_FlexII | 99.0 CSPAQLLCSTPNGLDR                                    | Propionamide(C) @ 1; Propionamide(C) @ 8; Label: 13C(6)15N(4)(R) @ 16                                                          |                                  | -0.0423546  | 1825.82666 | 913.9206 | 1825.86902 | 913.941773 | 2 | 11 | 19.7941 | 33.74 |
| 4 | 62.05 | 64.05 | 56.1 CDC25C_FlexII | 99.0 CSPAQLLCSTPNGLDR                                    | Propionamide(C) @ 1; Propionamide(C) @ 8; Deamidated(N) @ 12; Label: 13C(6)15N(4)(R) @ 16                                      |                                  | 0.00579096  | 1826.85877 | 609.9602 | 1826.85303 | 609.958313 | 3 | 11 | 26.6537 | 33.74 |
| 4 | 62.05 | 64.05 | 56.1 CDC25C_FlexII | 99.0 DAMCSSANKENDNGNLVDSEMK                              | Propionamide(C) @ 4; Deamidated(N) @ 9; Label: 13C(6)15N(2)(K) @ 10; Label: 13C(6)15N(2)(K) @ 23                               | missed K-E @ 10                  | 0.0256363   | 2546.08008 | 849.7006 | 2546.0542  | 849.692017 | 3 | 16 | 15.5668 | 33.74 |
| 4 | 62.05 | 64.05 | 56.1 CDC25C_FlexII | 99.0 DFFPEYMELCQPSYCPMHQDHK                              | Propionamide(C) @ 10; Propionamide(C) @ 16; Label: 13C(6)15N(2)(K) @ 24                                                        |                                  | 0.00808646  | 3160.31519 | 633.0703 | 3160.30664 | 633.068604 | 5 | 14 | 18.4603 | 33.74 |
| 4 | 62.05 | 64.05 | 56.1 CDC25C_FlexII | 99.0 DTSFTVCPDVPR                                        | Propionamide(C) @ 7; Label: 13C(6)15N(4)(R) @ 12                                                                               |                                  | 0.00789253  | 1416.66626 | 709.3404 | 1416.65833 | 709.336426 | 2 | 13 | 17.0831 | 33.74 |
| 4 | 62.05 | 64.05 | 56.1 CDC25C_FlexII | 99.0 DTSFTVCPDVPR                                        | Propionamide(C) @ 7; Label: 13C(6)15N(4)(R) @ 12                                                                               |                                  | -0.00016412 | 1416.65833 | 709.3364 | 1416.65833 | 709.336426 | 2 | 15 | 17.3641 | 33.74 |
| 4 | 62.05 | 64.05 | 56.1 CDC25C_FlexII | 99.0 DTSFTVCPDVPR                                        | Propionamide(C) @ 7; Label: 13C(6)15N(4)(R) @ 12                                                                               |                                  | 0.00789253  | 1416.66626 | 709.3404 | 1416.65833 | 709.336426 | 2 | 12 | 26.5616 | 33.74 |
| 4 | 62.05 | 64.05 | 56.1 CDC25C_FlexII | 99.0 DTSFTVCPDVPR                                        | Propionamide(C) @ 7; Label: 13C(6)15N(4)(R) @ 12                                                                               |                                  | 0.00789253  | 1416.66626 | 709.3404 | 1416.65833 | 709.336426 | 2 | 9  | 21.3131 | 33.74 |
| 4 | 62.05 | 64.05 | 56.1 CDC25C_FlexII | 99.0 EEGSSSGSPSFR                                        | Label: 13C(6)15N(4)(R) @ 12                                                                                                    |                                  | 0.00704967  | 1205.52588 | 603.7702 | 1205.5188  | 603.766663 | 2 | 15 | 14.3494 | 33.74 |
| 4 | 62.05 | 64.05 | 56.1 CDC25C_FlexII | 99.0 ENDNGNLVDSEMK                                       | Deamidated(N) @ 6; Label: 13C(6)15N(2)(K) @ 13                                                                                 |                                  | -0.0118547  | 1472.60632 | 737.3104 | 1472.61804 | 737.316284 | 2 | 12 | 15.9926 | 33.74 |
| 4 | 62.05 | 64.05 | 56.1 CDC25C_FlexII | 99.0 FKDNITPDK                                           | Label: 13C(6)15N(2)(K) @ 2; Label: 13C(6)15N(2)(K) @ 9                                                                         | missed K-D @ 2                   | -0.00086194 | 1092.57788 | 365.1999 | 1092.57861 | 365.200165 | 3 | 8  | 14.1322 | 33.74 |
| 4 | 62.05 | 64.05 | 56.1 CDC25C_FlexII | 99.0 FKDNITPDK                                           | Label: 13C(6)15N(2)(K) @ 2; Label: 13C(6)15N(2)(K) @ 9                                                                         | missed K-D @ 2                   | -0.00086194 | 1092.57788 | 365.1999 | 1092.57861 | 365.200165 | 3 | 8  | 14.409  | 33.74 |
| 4 | 62.05 | 64.05 | 56.1 CDC25C_FlexII | 99.0 FKDNITPDKVK                                         | Label: 13C(6)15N(2)(K) @ 2; Label: 13C(6)15N(2)(K) @ 9; Label: 13C(6)15N(2)(K) @ 11                                            | missed K-D @ 2; missed K-V @ 9   | 0.00982787  | 1327.76611 | 664.8903 | 1327.75623 | 664.885376 | 2 | 14 | 14.4115 | 33.74 |
| 4 | 62.05 | 64.05 | 56.1 CDC25C_FlexII | 99.0 FKDNITPDKVK                                         | Label: 13C(6)15N(2)(K) @ 2; Label: 13C(6)15N(2)(K) @ 9; Label: 13C(6)15N(2)(K) @ 11                                            | missed K-D @ 2; missed K-V @ 9   | -5.98E-05   | 1327.75623 | 664.8854 | 1327.75623 | 664.885376 | 2 | 15 | 14.683  | 33.74 |
| 4 | 62.05 | 64.05 | 56.1 CDC25C_FlexII | 99.0 FKDNITPDKVK                                         | Label: 13C(6)15N(2)(K) @ 2; Label: 13C(6)15N(2)(K) @ 9; Label: 13C(6)15N(2)(K) @ 11                                            | missed K-D @ 2; missed K-V @ 9   | 0.0139665   | 1327.77014 | 332.9498 | 1327.75623 | 332.94632  | 4 | 8  | 14.6354 | 33.74 |
| 4 | 62.05 | 64.05 | 56.1 CDC25C_FlexII | 99.0 FLGDSANLSILSGGTPK                                   | Label: 13C(6)15N(2)(K) @ 17                                                                                                    |                                  | -0.0137761  | 1683.87854 | 562.3001 | 1683.89233 | 562.304688 | 3 | 13 | 18.0912 | 33.74 |
| 4 | 62.05 | 64.05 | 56.1 CDC25C_FlexII | 99.0 FLGDSANLSILSGGTPK                                   | Label: 13C(6)15N(2)(K) @ 17                                                                                                    |                                  | -0.00577462 | 1683.88672 | 842.9506 | 1683.89233 | 842.95343  | 2 | 14 | 18.0934 | 33.74 |
| 4 | 62.05 | 64.05 | 56.1 CDC25C_FlexII | 99.0 FLGDSANLSILSGGTPK                                   | Label: 13C(6)15N(2)(K) @ 17                                                                                                    |                                  | -0.00577462 | 1683.88672 | 842.9506 | 1683.89233 | 842.95343  | 2 | 24 | 18.6392 | 33.74 |
| 4 | 62.05 | 64.05 | 56.1 CDC25C_FlexII | 99.0 FLGDSANLSILSGGTPK                                   | Label: 13C(6)15N(2)(K) @ 17                                                                                                    |                                  | 0.0162532   | 1683.90857 | 562.3101 | 1683.89233 | 562.304688 | 3 | 19 | 18.7068 | 33.74 |
| 4 | 62.05 | 64.05 | 56.1 CDC25C_FlexII | 99.0 FLGDSANLSILSGGTPK                                   | Label: 13C(6)15N(2)(K) @ 17                                                                                                    |                                  | -0.0040351  | 1683.89185 | 842.9532 | 1683.89233 | 842.95343  | 2 | 23 | 18.9067 | 33.74 |
| 4 | 62.05 | 64.05 | 56.1 CDC25C_FlexII | 99.0 FLGDSANLSILSGGTPK                                   | Deamidated(N) @ 7; Label: 13C(6)15N(2)(K) @ 17                                                                                 |                                  | 0.0102112   | 1684.88672 | 843.4506 | 1684.87634 | 843.445435 | 2 | 21 | 19.1739 | 33.74 |
| 4 | 62.05 | 64.05 | 56.1 CDC25C_FlexII | 99.0 FLGDSANLSILSGGTPK                                   | Label: 13C(6)15N(2)(K) @ 17                                                                                                    |                                  | -0.00577462 | 1683.88672 | 842.9506 | 1683.89233 | 842.95343  | 2 | 17 | 19.4478 | 33.74 |
| 4 | 62.05 | 64.05 | 56.1 CDC25C_FlexII | 99.0 FLGDSANLSILSGGTPK                                   | Label: 13C(6)15N(2)(K) @ 17                                                                                                    |                                  | 0.00057305  | 1683.89282 | 842.9537 | 1683.89233 | 842.95343  | 2 | 22 | 19.3736 | 33.74 |
| 4 | 62.05 | 64.05 | 56.1 CDC25C_FlexII | 99.0 FLGDSANLSILSGGTPK                                   | Label: 13C(6)15N(2)(K) @ 17                                                                                                    |                                  | -0.00577462 | 1683.88672 | 842.9506 | 1683.89233 | 842.95343  | 2 | 19 | 20.0799 | 33.74 |
| 4 | 62.05 | 64.05 | 56.1 CDC25C_FlexII | 99.0 FLGDSANLSILSGGTPK                                   | Label: 13C(6)15N(2)(K) @ 17                                                                                                    |                                  | -0.00577462 | 1683.88672 | 842.9506 | 1683.89233 | 842.95343  | 2 | 19 | 20.9091 | 33.74 |
| 4 | 62.05 | 64.05 | 56.1 CDC25C_FlexII | 99.0 FLGDSANLSILSGGTPK                                   | Label: 13C(6)15N(2)(K) @ 17                                                                                                    |                                  | 0.0142449   | 1683.90662 | 842.9606 | 1683.89233 | 842.95343  | 2 | 18 | 21.8484 | 33.74 |
| 4 | 62.05 | 64.05 | 56.1 CDC25C_FlexII | 99.0 FLGDSANLSILSGGTPK                                   | Label: 13C(6)15N(2)(K) @ 17                                                                                                    |                                  | -0.00577462 | 1683.88672 | 842.9506 | 1683.89233 | 842.95343  | 2 | 11 | 23.2518 | 33.74 |
| 4 | 62.05 | 64.05 | 56.1 CDC25C_FlexII | 99.0 FLGDSANLSILSGGTPK                                   | Label: 13C(6)15N(2)(K) @ 17                                                                                                    |                                  | -0.00577462 | 1683.88672 | 842.9506 | 1683.89233 | 842.95343  | 2 | 10 | 23.5062 | 33.74 |
| 4 | 62.05 | 64.05 | 56.1 CDC25C_FlexII | 99.0 FLGDSANLSILSGGTPK                                   | Deamidated(N) @ 7; Label: 13C(6)15N(2)(K) @ 17                                                                                 |                                  | 0.0102112   | 1684.88672 | 843.4506 | 1684.87634 | 843.445435 | 2 | 11 | 24.5158 | 33.74 |
| 4 | 62.05 | 64.05 | 56.1 CDC25C_FlexII | 99.0 FLGDSANLSILSGGTPK                                   | Label: 13C(6)15N(2)(K) @ 17                                                                                                    |                                  | -0.00577462 | 1683.88672 | 842.9506 | 1684.87634 | 842.95343  | 2 | 17 | 26.4814 | 33.74 |
| 4 | 62.05 | 64.05 | 56.1 CDC25C_FlexII | 99.0 FLGDSANLSILSGGTPK                                   | Label: 13C(6)15N(2)(K) @ 17                                                                                                    |                                  | -0.00573153 | 1683.88672 | 842.9506 | 1683.89233 | 842.95343  | 2 | 22 | 18.7111 | 33.74 |
| 4 | 62.05 | 64.05 | 56.1 CDC25C_FlexII | 99.0 FLGDSANLSILSGGTPK                                   | Deamidated(N) @ 7; Label: 13C(6)15N(2)(K) @ 17                                                                                 |                                  | 0.0102112   | 1684.88672 | 843.4506 | 1684.87634 | 843.445435 | 2 | 11 | 20.5018 | 33.74 |
| 4 | 62.05 | 64.05 | 56.1 CDC25C_FlexII | 99.0 FLGDSANLSILSGGTPK                                   | Deamidated(N) @ 7; Label: 13C(6)15N(2)(K) @ 17                                                                                 |                                  | 0.0102112   | 1684.88672 | 843.4506 | 1684.87634 | 843.445435 | 2 | 11 | 21.4225 | 33.74 |
| 4 | 62.05 | 64.05 | 56.1 CDC25C_FlexII | 99.0 FLGDSANLSILSGGTPK                                   | Deamidated(N) @ 7; Label: 13C(6)15N(2)(K) @ 17                                                                                 |                                  | 0.0302308   | 1684.90662 | 843.4606 | 1684.87634 | 843.445435 | 2 | 9  | 24.0596 | 33.74 |
| 4 | 62.05 | 64.05 | 56.1 CDC25C_FlexII | 99.0 FLGDSANLSILSGGTPK                                   | Deamidated(N) @ 7; Label: 13C(6)15N(2)(K) @ 17                                                                                 |                                  | 0.0302308   | 1684.90662 | 843.4606 | 1684.87634 | 843.445435 | 2 | 8  | 24.8822 | 33.74 |
| 4 | 62.05 | 64.05 | 56.1 CDC25C_FlexII | 99.0 FLGDSANLSILSGGTPK                                   | Deamidated(N) @ 7; Label: 13C(6)15N(2)(K) @ 17                                                                                 |                                  | 0.0102112   | 1684.88672 | 843.4506 | 1684.87634 | 843.445435 | 2 | 10 | 21.1701 | 33.74 |
| 4 | 62.05 | 64.05 | 56.1 CDC25C_FlexII | 99.0 GGYRDFPEYMELCQPSYCPMHQDHK                           | Label: 13C(6)15N(4)(R) @ 4; Propionamide(C) @ 14; Deamidated(Q) @ 17; Propionamide(C) @ 20; Label: 13C(6)15N(2)(K) @ 28        | missed R-D @ 4                   | 0.00889226  | 3604.51489 | 721.9103 |            |            |   |    |         |       |

|   |       |       |                     |                                      |                                                                                                          |                                 |             |            |          |            |            |   |    |         |       |
|---|-------|-------|---------------------|--------------------------------------|----------------------------------------------------------------------------------------------------------|---------------------------------|-------------|------------|----------|------------|------------|---|----|---------|-------|
| 4 | 62.05 | 64.05 | 56.1 CDC25C_FlexIII | 99.0 LDKNPNLNGEDQAEIISDELMEFSLKDQEAk | Label: 13C(6)15N(2)(K) @ 3; Deamidated(O) @ 11; Label: 13C(6)15N(2)(K) @ 25; Label: 13C(6)15N(2)(K) @ 30 | missed K-N @ 3; missed K-D @ 25 | 0.0108462   | 3459.64111 | 1154.221 | 3459.63013 | 1154.21729 | 3 | 25 | 19.4354 | 33.74 |
| 4 | 62.05 | 64.05 | 56.1 CDC25C_FlexIII | 99.0 LDKNPNLNGEDQAEIISDELMEFSLKDQEAk | Label: 13C(6)15N(2)(K) @ 3; Deamidated(O) @ 11; Label: 13C(6)15N(2)(K) @ 25; Label: 13C(6)15N(2)(K) @ 30 | missed K-N @ 3; missed K-D @ 25 | 0.0108462   | 3459.64111 | 1154.221 | 3459.63013 | 1154.21729 | 3 | 26 | 19.7005 | 33.74 |
| 4 | 62.05 | 64.05 | 56.1 CDC25C_FlexIII | 99.0 LDKNPNLNGEDQAEIISDELMEFSLKDQEAk | Label: 13C(6)15N(2)(K) @ 3; Label: 13C(6)15N(2)(K) @ 25; Label: 13C(6)15N(2)(K) @ 30                     | missed K-N @ 3; missed K-D @ 25 | 0.00693947  | 3458.65283 | 865.6705 | 3458.64624 | 865.668823 | 4 | 14 | 26.6274 | 33.74 |
| 4 | 62.05 | 64.05 | 56.1 CDC25C_FlexIII | 99.0 MLNLLLL                         | Label: 13C(6)15N(4)(R) @ 8                                                                               |                                 | 0.00014436  | 1010.58221 | 506.2985 | 1010.58221 | 506.29837  | 2 | 10 | 18.9361 | 33.74 |
| 4 | 62.05 | 64.05 | 56.1 CDC25C_FlexIII | 99.0 MLNLLLL                         | Label: 13C(6)15N(4)(R) @ 8                                                                               |                                 | -0.00168669 | 1010.58044 | 506.2975 | 1010.58221 | 506.29837  | 2 | 10 | 19.5361 | 33.74 |
| 4 | 62.05 | 64.05 | 56.1 CDC25C_FlexIII | 99.0 MLNLLLL                         | Label: 13C(6)15N(4)(R) @ 8                                                                               |                                 | 0.0033182   | 1010.58545 | 506.3    | 1010.58221 | 506.29837  | 2 | 9  | 19.8027 | 33.74 |
| 4 | 62.05 | 64.05 | 56.1 CDC25C_FlexIII | 99.0 MLNLLLL                         |                                                                                                          |                                 | -0.00020687 | 1000.57367 | 501.2941 | 1000.57391 | 501.294251 | 2 | 9  | 19.0121 | 33.74 |
| 4 | 62.05 | 64.05 | 56.1 CDC25C_FlexIII | 99.0 MLNLLLL                         | Label: 13C(6)15N(4)(R) @ 8                                                                               |                                 | -3.87E-05   | 1010.58228 | 506.2984 | 1010.58221 | 506.29837  | 2 | 9  | 20.0754 | 33.74 |
| 4 | 62.05 | 64.05 | 56.1 CDC25C_FlexIII | 99.0 QLREQIALLVK                     | Label: 13C(6)15N(4)(R) @ 3; Label: 13C(6)15N(2)(K) @ 11                                                  | missed R-E @ 3                  | -0.00467558 | 1327.82605 | 664.9203 | 1327.83069 | 664.922607 | 2 | 10 | 17.7835 | 33.74 |
| 4 | 62.05 | 64.05 | 56.1 CDC25C_FlexIII | 99.0 SLNQYPALYPPELYLK                | Label: 13C(6)15N(2)(K) @ 17                                                                              |                                 | -0.00175564 | 2095.11133 | 1048.563 | 2095.11206 | 1048.56335 | 2 | 16 | 20.2951 | 33.74 |
| 4 | 62.05 | 64.05 | 56.1 CDC25C_FlexIII | 99.0 SLNQYPALYPPELYLK                | Label: 13C(6)15N(2)(K) @ 17                                                                              |                                 | -0.00011355 | 2095.11206 | 699.3779 | 2095.11206 | 699.377991 | 3 | 15 | 20.2973 | 33.74 |
| 4 | 62.05 | 64.05 | 56.1 CDC25C_FlexIII | 99.0 SLNQYPALYPPELYLK                | Label: 13C(6)15N(2)(K) @ 17                                                                              |                                 | 0.00166233  | 2095.11328 | 1048.564 | 2095.11206 | 1048.56335 | 2 | 16 | 20.5608 | 33.74 |
| 4 | 62.05 | 64.05 | 56.1 CDC25C_FlexIII | 99.0 SLNQYPALYPPELYLK                | Label: 13C(6)15N(2)(K) @ 17                                                                              |                                 | 0.00702758  | 2095.11914 | 699.3803 | 2095.11206 | 699.377991 | 3 | 16 | 20.563  | 33.74 |
| 4 | 62.05 | 64.05 | 56.1 CDC25C_FlexIII | 99.0 SLNQYPALYPPELYLK                | Label: 13C(6)15N(2)(K) @ 17                                                                              |                                 | -0.00492947 | 2095.10742 | 1048.561 | 2095.11206 | 1048.56335 | 2 | 13 | 21.2177 | 33.74 |
| 4 | 62.05 | 64.05 | 56.1 CDC25C_FlexIII | 99.0 SLNQYPALYPPELYLK                | Deamidated(O) @ 4                                                                                        |                                 | 0.00522445  | 2088.0874  | 1045.051 | 2088.08203 | 1045.04822 | 2 | 11 | 20.3894 | 33.74 |
| 4 | 62.05 | 64.05 | 56.1 CDC25C_FlexIII | 99.0 SLNQYPALYPPELYLK                | Deamidated(O) @ 4; Label: 13C(6)15N(2)(K) @ 17                                                           |                                 | 0.0110564   | 2096.10742 | 1049.061 | 2096.09619 | 1049.0553  | 2 | 9  | 21.789  | 33.74 |
| 4 | 62.05 | 64.05 | 56.1 CDC25C_FlexIII | 99.0 SPSMPENLNRP                     | Label: 13C(6)15N(4)(R) @ 10; Label: 13C(6)15N(4)(R) @ 12                                                 |                                 | 0.00142384  | 1416.7063  | 709.3604 | 1416.70471 | 709.359619 | 2 | 12 | 15.2855 | 33.74 |
| 4 | 62.05 | 64.05 | 56.1 CDC25C_FlexIII | 99.0 TVSLCDITITQMLEEDSNQGHUGDFSK     | Propionamide(C) @ 5; Label: 13C(6)15N(2)(K) @ 28                                                         |                                 | 0.0180044   | 3172.53247 | 794.1404 | 3172.51489 | 794.135986 | 4 | 17 | 19.9919 | 33.74 |
| 4 | 62.05 | 64.05 | 56.1 CDC25C_FlexIII | 99.0 TVSLCDITITQMLEEDSNQGHUGDFSK     | Propionamide(C) @ 5; Label: 13C(6)15N(2)(K) @ 28                                                         |                                 | -0.00591552 | 3172.5083  | 1058.51  | 3172.51489 | 1058.51221 | 3 | 19 | 20.1876 | 33.74 |
| 4 | 62.05 | 64.05 | 56.1 CDC25C_FlexIII | 99.0 TVSLCDITITQMLEEDSNQGHUGDFSK     | Propionamide(C) @ 5; Label: 13C(6)15N(2)(K) @ 28                                                         |                                 | 0.00177492  | 3172.51709 | 1058.513 | 3172.51489 | 1058.51221 | 3 | 19 | 21.765  | 33.74 |
| 4 | 62.05 | 64.05 | 56.1 CDC25C_FlexIII | 99.0 TVSLCDITITQMLEEDSNQGHUGDFSK     | Propionamide(C) @ 5; Deamidated(O) @ 11; Label: 13C(6)15N(2)(K) @ 28                                     |                                 | 0.0318922   | 3173.53101 | 1058.851 | 3173.49878 | 1058.84021 | 3 | 16 | 20.0087 | 33.74 |
| 4 | 62.05 | 64.05 | 56.1 CDC25C_FlexIII | 99.0 VCALOPTVSGK                     | Propionamide(C) @ 2; Label: 13C(6)15N(2)(K) @ 10                                                         |                                 | 0.00761827  | 1052.58545 | 527.3    | 1052.578   | 527.296265 | 2 | 11 | 15.8939 | 33.74 |
| 4 | 62.05 | 64.05 | 56.1 CDC25C_FlexIII | 99.0 VCALOPTVSGK                     | Propionamide(C) @ 2; Label: 13C(6)15N(2)(K) @ 10                                                         |                                 | 4.99E-05    | 1052.57813 | 527.2963 | 1052.578   | 527.296265 | 2 | 13 | 16.1653 | 33.74 |
| 4 | 62.05 | 64.05 | 56.1 CDC25C_FlexIII | 99.0 VCALOPTVSGK                     | Propionamide(C) @ 2; Label: 13C(6)15N(2)(K) @ 10                                                         |                                 | 0.00761827  | 1052.58545 | 527.3    | 1052.578   | 527.296265 | 2 | 10 | 16.432  | 33.74 |
| 4 | 62.05 | 64.05 | 56.1 CDC25C_FlexIII | 99.0 VCALOPTVSGK                     | Propionamide(C) @ 2; Label: 13C(6)15N(2)(K) @ 10                                                         |                                 | 0.00529893  | 1052.58325 | 527.2989 | 1052.578   | 527.296265 | 2 | 9  | 26.5399 | 33.74 |
| 4 | 62.05 | 64.05 | 56.1 CDC25C_FlexIII | 99.0 YLGSPIITVPK                     | Label: 13C(6)15N(2)(K) @ 11                                                                              |                                 | 5.02E-05    | 1182.67407 | 592.3443 | 1182.67395 | 592.344238 | 2 | 12 | 17.227  | 33.74 |
| 4 | 62.05 | 64.05 | 56.1 CDC25C_FlexIII | 99.0 YLGSPIITVPK                     | Label: 13C(6)15N(2)(K) @ 11                                                                              |                                 | 0.00041643  | 1182.67444 | 592.3445 | 1182.67395 | 592.344238 | 2 | 11 | 16.9669 | 33.74 |
| 4 | 62.05 | 64.05 | 56.1 CDC25C_FlexIII | 99.0 YLGSPIITVPK                     | Label: 13C(6)15N(2)(K) @ 11                                                                              |                                 | -0.00068806 | 1182.67322 | 395.2317 | 1182.67395 | 395.231934 | 3 | 10 | 15.6151 | 33.74 |
| 4 | 62.05 | 64.05 | 56.1 CDC25C_FlexIII | 99.0 YLGSPIITVPK                     | Label: 13C(6)15N(2)(K) @ 11                                                                              |                                 | 0.00041643  | 1182.67444 | 592.3445 | 1182.67395 | 592.344238 | 2 | 10 | 17.5015 | 33.74 |
| 4 | 62.05 | 64.05 | 56.1 CDC25C_FlexIII | 99.0 YPTFLYK                         | Label: 13C(6)15N(2)(K) @ 7                                                                               | cleaved P-Y @ N-term            | -0.00165037 | 938.497681 | 470.2561 | 938.499329 | 470.256928 | 2 | 9  | 18.0092 | 33.74 |
| 4 | 62.05 | 64.05 | 56.1 CDC25C_FlexIII | 99.0 YPTFLYK                         | Label: 13C(6)15N(2)(K) @ 7                                                                               | cleaved P-Y @ N-term            | 0.00020099  | 938.499451 | 470.257  | 938.499329 | 470.256928 | 2 | 9  | 17.9008 | 33.74 |
| 4 | 62.05 | 64.05 | 56.1 CDC25C_FlexIII | 99.0 YPTFLYK                         | Label: 13C(6)15N(2)(K) @ 7                                                                               | cleaved P-Y @ N-term            | -0.00091407 | 938.498474 | 470.2565 | 938.499329 | 470.256928 | 2 | 9  | 17.7612 | 33.74 |
| 5 | 59.76 | 61.76 | 81.6 2-SEP_FlexIII  | 99.0 AIHNKVINVPVIAK                  | Label: 13C(6)15N(2)(K) @ 5; Label: 13C(6)15N(2)(K) @ 14                                                  | missed K-V @ 5                  | -0.00110697 | 1530.95703 | 511.3263 | 1530.95813 | 511.326633 | 3 | 17 | 16.2035 | NA    |
| 5 | 59.76 | 61.76 | 81.6 2-SEP_FlexIII  | 99.0 ASIPIFSVGSNQIEAK                | Label: 13C(6)15N(2)(K) @ 17                                                                              |                                 | -0.00298229 | 1766.96289 | 884.4887 | 1766.96582 | 884.490173 | 2 | 16 | 18.9789 | NA    |
| 5 | 59.76 | 61.76 | 81.6 2-SEP_FlexIII  | 99.0 GRLYPVGVVEVENPEHNDFLK           | Label: 13C(6)15N(4)(R) @ 2; Label: 13C(6)15N(2)(K) @ 21                                                  | missed R-L @ 2                  | -0.00086572 | 2515.2605  | 629.8224 | 2515.26148 | 629.822632 | 4 | 16 | 18.5523 | NA    |
| 5 | 59.76 | 61.76 | 81.6 2-SEP_FlexIII  | 99.0 ILDEIEEHNK                      | Label: 13C(6)15N(2)(K) @ 11                                                                              |                                 | -0.00113128 | 1359.7113  | 454.2444 | 1359.71252 | 454.244782 | 3 | 11 | 16.2225 | NA    |
| 5 | 59.76 | 61.76 | 81.6 2-SEP_FlexIII  | 99.0 IYHLPDAEDEDDEDFKEQTR            | Label: 13C(6)15N(2)(K) @ 16; Label: 13C(6)15N(4)(R) @ 20                                                 | missed K-E @ 16                 | -0.0107107  | 2454.08325 | 1228.049 | 2454.09424 | 1228.05432 | 2 | 23 | 16.2836 | NA    |
| 5 | 59.76 | 61.76 | 81.6 2-SEP_FlexIII  | 99.0 KGFEFTLMVVGESGLGK               | Label: 13C(6)15N(2)(K) @ 1; Label: 13C(6)15N(2)(K) @ 17                                                  | missed K-G @ 1                  | 0.00208654  | 1813.96411 | 907.9893 | 1813.96191 | 907.98822  | 2 | 25 | 19.5364 | NA    |
| 5 | 59.76 | 61.76 | 81.6 2-SEP_FlexIII  | 99.0 KTLLEWEK                        | Label: 13C(6)15N(2)(K) @ 1; Label: 13C(6)15N(2)(K) @ 7                                                   | missed K-T @ 1                  | -0.00012715 | 932.566467 | 467.2905 | 932.566589 | 467.290588 | 2 | 10 | 16.2957 | NA    |
| 5 | 59.76 | 61.76 | 81.6 2-SEP_FlexIII  | 99.0 KVENEDMMKQIILEK                 | Label: 13C(6)15N(2)(K) @ 1; Label: 13C(6)15N(2)(K) @ 9; Label: 13C(6)15N(2)(K) @ 16                      | missed K-V @ 1; missed K-D @ 9  | -0.0155611  | 1969.00977 | 493.2597 | 1969.02527 | 493.26358  | 4 | 16 | 15.9593 | NA    |
| 5 | 59.76 | 61.76 | 81.6 2-SEP_FlexIII  | 99.0 LRLTVDDTPGVGDAINCR              | Label: 13C(6)15N(4)(R) @ 2; Propionamide(C) @ 17; Label: 13C(6)15N(4)(R) @ 18                            | missed R-L @ 2                  | 0.00367674  | 2053.05664 | 685.3595 | 2053.05298 | 685.358276 | 3 | 17 | 17.4442 | NA    |
| 5 | 59.76 | 61.76 | 81.6 2-SEP_FlexIII  | 99.0 LTTVDDTPGVGDAINCR               | Propionamide(C) @ 15; Label: 13C(6)15N(4)(R) @ 16                                                        |                                 | -0.0126292  | 1773.84705 | 592.2896 | 1773.8595  | 592.293762 | 3 | 20 | 17.0806 | NA    |
| 5 | 59.76 | 61.76 | 81.6 2-SEP_FlexIII  | 99.0 LYPVGVVEVENPEHNDFLK             | Label: 13C(6)15N(2)(K) @ 19                                                                              |                                 | -0.00093868 | 2292.12964 | 765.0505 | 2292.13062 | 765.050842 | 3 | 15 | 19.3826 | NA    |
| 5 | 59.76 | 61.76 | 81.6 2-SEP_FlexIII  | 99.0 MQAQMOMQMOGGDGGGALGHVHYPTFLYK   | Label: 13C(6)15N(2)(K) @ 30                                                                              |                                 | -0.00297977 | 3303.47852 | 826.8769 | 3303.48145 | 826.877625 | 4 | 17 | 18.1645 | NA    |
| 5 | 59.76 | 61.76 | 81.6 2-SEP_FlexIII  | 99.0 QQPTQFINPETPGYVGFANLPNQVHR      | Label: 13C(6)15N(4)(R) @ 26                                                                              |                                 | 0.00962295  | 2961.48584 | 988.1692 | 2961.47607 | 988.165955 | 3 | 20 | 18.4465 | NA    |
| 5 | 59.76 | 61.76 | 81.6 2-SEP_FlexIII  | 99.0 QQPTQFINPETPGYVGFANLPNQVHRK     | Deamidated(N) @ 8; Label: 13C(6)15N(4)(R) @ 26; Label: 13C(6)15N(2)(K) @ 27                              | missed R-K @ 26                 | -0.00064984 | 3098.5686  | 775.6494 | 3098.56934 | 775.649597 | 4 | 13 | 18.0971 | NA    |
| 5 | 59.76 | 61.76 | 81.6 2-SEP_FlexIII  | 99.0 RILDEIEEHNK                     | Label: 13C(6)15N(4)(R) @ 1; Label: 13C(6)15N(2)(K) @ 12                                                  | missed R-I @ 1                  | -0.0147869  | 1525.80689 | 509.6096 | 1525.8219  | 509.614594 | 3 | 14 | 16.3699 | NA    |
| 5 | 59.76 | 61.76 | 81.6 2-SEP_FlexIII  | 99.0 RMOEIMAR                        | Label: 13C(6)15N(4)(R) @ 1; Label: 13C(6)15N(4)(R) @ 8                                                   | missed R-M @ 1                  | -0.00785099 | 1053.5249  | 527.7697 | 1053.53259 | 527.773621 | 2 | 11 | 14.4596 | NA    |
| 5 | 59.76 | 61.76 | 81.6 2-SEP_FlexIII  | 99.0 STLINSFLTDLYPER                 | Label: 13C(6)15N(4)(R) @ 16                                                                              |                                 | -0.00087147 | 1890.99585 | 946.5052 | 1890.9967  | 946.505615 | 2 | 19 | 20.5408 | NA    |
| 5 | 59.76 | 61.76 | 81.6 2-SEP_FlexIII  | 99.0 TIISYIDEQFER                    | Label: 13C(6)15N(4)(R) @ 12                                                                              |                                 | 0.0007541   | 1522.75513 | 762.3848 | 1522.75427 | 762.384399 | 2 | 13 | 19.9099 | NA    |
| 5 | 59.76 | 61.76 | 81.6 2-SEP_FlexIII  | 99.0 TMLITHMQDLOEVQDLYHENFR          | Deamidated(O) @ 11                                                                                       |                                 | 0.00419972  | 2862.33569 | 955.1192 | 2862.33154 | 955.117859 | 3 | 17 | 19.0411 | NA    |
| 5 | 59.76 | 61.76 | 81.6 2-SEP_FlexIII  | 99.0 TVQIEASTVEIER                   | Label: 13C(6)15N(4)(R) @ 14                                                                              |                                 | -0.0141961  | 1612.80432 | 807.4004 | 1612.81836 | 807.416443 | 2 | 16 | 18.9545 | NA    |
| 5 | 59.76 | 61.76 | 81.6 2-SEP_FlexIII  | 99.0 VHCCFYFISPHFGGLKPLDVAFMK        | Propionamide(C) @ 3; Propionamide(C) @ 4; Label: 13C(6)15N(2)(K) @ 16; Label: 13C(6)15N(2)(K) @ 24       |                                 | -0.00163923 | 2913.44849 | 729.3694 | 2913.45044 | 729.369873 | 4 | 17 | 19.5988 | NA    |
| 5 | 59.76 | 61.76 | 81.6 2-SEP_FlexIII  | 99.0 VIPGAALNTR                      |                                                                                                          |                                 | -0.00026347 | 1081.62402 | 541.8193 | 1081.62439 | 541.819458 | 2 | 11 | 16.4599 | NA    |
| 5 | 59.76 | 61.76 | 81.6 2-SEP_FlexIII  | 99.0 VINVPVIAK                       | Label: 13C(6)15N(2)(K) @ 9                                                                               |                                 | -0.00043286 | 959.625488 | 480.82   | 959.625916 | 480.820221 | 2 | 10 | 17.755  | NA    |
| 5 | 59.76 | 61.76 | 81.6 2-SEP_FlexIII  | 99.0 YLHDESGLNR                      | Label: 13C(6)15N(4)(R) @ 10                                                                              |                                 | -0.00176678 | 1212.57459 | 405.1988 | 1212.57629 | 405.199371 | 3 | 11 | 14.0607 | NA    |
| 5 | 59.76 | 61.76 | 81.6 2-SEP_FlexIII  | 99.0 YLHDESGLNRR                     | Label: 13C(6)15N(4)(R) @ 10; Label: 13C(6)15N(4)(R) @ 11                                                 | missed R-R @ 10                 | -0.00126226 | 1378.68445 | 690.3495 | 1378.68567 | 690.350098 | 2 | 14 | 13.5378 | NA    |
| 5 | 59.76 | 61.76 | 81.6 2-SEP_FlexIII  | 99.0 ASIPIFSVGSNQIEAK                | Label: 13C(6)15N(2)(K) @ 17                                                                              |                                 | 0.00141224  | 1766.96729 | 884.4909 | 1766.96582 | 884.490173 | 2 | 16 | 18.7124 | NA    |
| 5 | 59.76 | 61.76 | 81.6 2-SEP_FlexIII  | 99.0 ASIPIFSVGSNQIEAK                |                                                                                                          |                                 | -0.00171497 | 1758.94983 | 880.4822 | 1758.95166 | 880.48     |   |    |         |       |

|   |       |       |                    |                                         |                                                                                                    |                                |             |            |          |            |            |   |    |         |       |
|---|-------|-------|--------------------|-----------------------------------------|----------------------------------------------------------------------------------------------------|--------------------------------|-------------|------------|----------|------------|------------|---|----|---------|-------|
| 5 | 59.76 | 61.76 | 81.6 2-SEP_FlexIII | 99.0 KVENEDMMKQDILLEK                   | Label: 13C(6)15N(2)(K) @ 1; Label: 13C(6)15N(2)(K) @ 9; Label: 13C(6)15N(2)(K) @ 16                | missed K-V @ 1; missed K-D @ 9 | -0.00753501 | 1969.0177  | 657.3465 | 1969.02527 | 657.348999 | 3 | 19 | 15.9663 | NA    |
| 5 | 59.76 | 61.76 | 81.6 2-SEP_FlexIII | 99.0 LTVVDTPOGYDAINCR                   | Propionamide(C) @ 15; Label: 13C(6)15N(4)(R) @ 16                                                  |                                | -0.00130723 | 1773.85828 | 887.9364 | 1773.8596  | 887.937012 | 2 | 18 | 17.0761 | NA    |
| 5 | 59.76 | 61.76 | 81.6 2-SEP_FlexIII | 99.0 LYPWGVVEVENPEHNDFLK                |                                                                                                    |                                | 2.35E-05    | 2284.1167  | 762.3795 | 2284.11646 | 762.379395 | 3 | 12 | 19.2475 | NA    |
| 5 | 59.76 | 61.76 | 81.6 2-SEP_FlexIII | 99.0 LYPWGVVEVENPEHNDFLK                | Deamidated(N) @ 11; Label: 13C(6)15N(2)(K) @ 19                                                    |                                | 0.00878863  | 2293.12329 | 1147.569 | 2293.11475 | 1147.56458 | 2 | 11 | 19.1431 | NA    |
| 5 | 59.76 | 61.76 | 81.6 2-SEP_FlexIII | 99.0 MQAQMQMQMGDDGGDGLGHVHYPTFLYK       | Deamidated(Q) @ 10; Label: 13C(6)15N(2)(K) @ 30                                                    |                                | 0.0230134   | 3304.48853 | 827.1294 | 3304.46533 | 827.123596 | 4 | 15 | 17.8965 | NA    |
| 5 | 59.76 | 61.76 | 81.6 2-SEP_FlexIII | 99.0 QQPTQFINPETPGYGVGFANLPNQVHR        | Deamidated(N) @ 8; Label: 13C(6)15N(4)(R) @ 26                                                     |                                | 0.0285666   | 2962.48901 | 741.6295 | 2962.46021 | 741.622315 | 4 | 17 | 18.4833 | NA    |
| 5 | 59.76 | 61.76 | 81.6 2-SEP_FlexIII | 99.0 QQPTQFINPETPGYGVGFANLPNQVHR        | Label: 13C(6)15N(4)(R) @ 26                                                                        |                                | -0.107534   | 2961.36865 | 741.3494 | 2961.47607 | 741.376282 | 4 | 11 | 18.6037 | NA    |
| 5 | 59.76 | 61.76 | 81.6 2-SEP_FlexIII | 99.0 STLINSFLTDLYPER                    | Deamidated(N) @ 5; Label: 13C(6)15N(4)(R) @ 16                                                     |                                | 0.00327117  | 1891.98413 | 946.9993 | 1891.98071 | 946.99762  | 2 | 17 | 20.2806 | NA    |
| 5 | 59.76 | 61.76 | 81.6 2-SEP_FlexIII | 99.0 STLINSFLTDLYPER                    | Label: 13C(6)15N(4)(R) @ 16                                                                        |                                | 0.00025772  | 1890.99695 | 631.3396 | 1890.9967  | 631.339478 | 3 | 18 | 20.3141 | NA    |
| 5 | 59.76 | 61.76 | 81.6 2-SEP_FlexIII | 99.0 THSYDEQFER                         | Label: 13C(6)15N(4)(R) @ 12                                                                        |                                | 0.0100314   | 1522.76453 | 762.3895 | 1522.75427 | 762.384399 | 2 | 13 | 19.6398 | NA    |
| 5 | 59.76 | 61.76 | 81.6 2-SEP_FlexIII | 99.0 THSYDEQFER                         | Label: 13C(6)15N(4)(R) @ 12                                                                        |                                | -0.00711938 | 1522.74719 | 508.5897 | 1522.75427 | 508.592041 | 3 | 12 | 19.7305 | NA    |
| 5 | 59.76 | 61.76 | 81.6 2-SEP_FlexIII | 99.0 TMLITHMQDLQEVTDQLHYENFR            | Oxidation(M) @ 7; Deamidated(Q) @ 15; Label: 13C(6)15N(4)(R) @ 23                                  |                                | 0.0109396   | 2888.3457  | 963.7892 | 2888.33496 | 963.785584 | 3 | 16 | 18.3295 | NA    |
| 5 | 59.76 | 61.76 | 81.6 2-SEP_FlexIII | 99.0 TMLITHMQDLQEVTDQLHYENFR            | Oxidation(M) @ 2; Deamidated(Q) @ 15; Label: 13C(6)15N(4)(R) @ 23                                  |                                | 0.0109396   | 2888.3457  | 963.7892 | 2888.33496 | 963.785584 | 3 | 16 | 18.6846 | NA    |
| 5 | 59.76 | 61.76 | 81.6 2-SEP_FlexIII | 99.0 TMLITHMQDLQEVTDQLHYENFR            | Deamidated(Q) @ 11; Label: 13C(6)15N(4)(R) @ 23                                                    |                                | 0.0287275   | 2872.36865 | 719.0994 | 2872.33964 | 719.092285 | 4 | 17 | 19.9567 | NA    |
| 5 | 59.76 | 61.76 | 81.6 2-SEP_FlexIII | 99.0 TMLITHMQDLQEVTDQLHYENFR            | Label: 13C(6)15N(4)(R) @ 23                                                                        |                                | -0.0044984  | 2871.35132 | 958.1244 | 2871.35596 | 958.125916 | 3 | 28 | 18.9819 | NA    |
| 5 | 59.76 | 61.76 | 81.6 2-SEP_FlexIII | 99.0 TMLITHMQDLQEVTDQLHYENFR            | Deamidated(Q) @ 11; Label: 13C(6)15N(4)(R) @ 23                                                    |                                | 0.0229291   | 2872.36328 | 1437.189 | 2872.33964 | 1437.17725 | 2 | 24 | 19.0456 | NA    |
| 5 | 59.76 | 61.76 | 81.6 2-SEP_FlexIII | 99.0 TMLITHMQDLQEVTDQLHYENFR            | Deamidated(Q) @ 11; Label: 13C(6)15N(4)(R) @ 23                                                    |                                | 0.0287275   | 2872.36865 | 719.0994 | 2872.33964 | 719.092285 | 4 | 19 | 19.2352 | NA    |
| 5 | 59.76 | 61.76 | 81.6 2-SEP_FlexIII | 99.0 TMLITHMQDLQEVTDQLHYENFR            | Deamidated(Q) @ 11; Label: 13C(6)15N(4)(R) @ 23                                                    |                                | 0.0160016   | 2872.35596 | 958.4592 | 2872.33964 | 958.453919 | 3 | 25 | 19.2605 | NA    |
| 5 | 59.76 | 61.76 | 81.6 2-SEP_FlexIII | 99.0 TMLITHMQDLQEVTDQLHYENFR            | Label: 13C(6)15N(4)(R) @ 23                                                                        |                                | 0.0127441   | 2871.36865 | 718.8494 | 2871.35596 | 718.846252 | 4 | 15 | 19.5145 | NA    |
| 5 | 59.76 | 61.76 | 81.6 2-SEP_FlexIII | 99.0 TMLITHMQDLQEVTDQLHYENFR            | Label: 13C(6)15N(4)(R) @ 23                                                                        |                                | 0.00996691  | 2871.36572 | 958.1292 | 2871.35596 | 958.125916 | 3 | 14 | 20.0262 | NA    |
| 5 | 59.76 | 61.76 | 81.6 2-SEP_FlexIII | 99.0 TMLITHMQDLQEVTDQLHYENFR            | Label: 13C(6)15N(4)(R) @ 23                                                                        |                                | 0.00322258  | 2871.35889 | 718.847  | 2871.35596 | 718.846252 | 4 | 13 | 19.9187 | NA    |
| 5 | 59.76 | 61.76 | 81.6 2-SEP_FlexIII | 99.0 TVQIEASTVEIEER                     | Label: 13C(6)15N(4)(R) @ 14                                                                        |                                | 0.00582336  | 1612.82422 | 807.4194 | 1612.81836 | 807.416443 | 2 | 18 | 16.9067 | NA    |
| 5 | 59.76 | 61.76 | 81.6 2-SEP_FlexIII | 99.0 TVQIEASTVEIEER                     | Label: 13C(6)15N(4)(R) @ 14                                                                        |                                | -0.0008905  | 1612.81751 | 807.416  | 1612.81836 | 807.416443 | 2 | 18 | 17.1729 | NA    |
| 5 | 59.76 | 61.76 | 81.6 2-SEP_FlexIII | 99.0 TVQIEASTVEIEER                     | Label: 13C(6)15N(4)(R) @ 14                                                                        |                                | 0.00582336  | 1612.82422 | 807.4194 | 1612.81836 | 807.416443 | 2 | 18 | 17.437  | NA    |
| 5 | 59.76 | 61.76 | 81.6 2-SEP_FlexIII | 99.0 TVQIEASTVEIEER                     | Label: 13C(6)15N(4)(R) @ 14                                                                        |                                | 0.00582336  | 1612.82422 | 807.4194 | 1612.81836 | 807.416443 | 2 | 16 | 18.1515 | NA    |
| 5 | 59.76 | 61.76 | 81.6 2-SEP_FlexIII | 99.0 TVQIEASTVEIEER                     | Label: 13C(6)15N(4)(R) @ 14                                                                        |                                | 0.00582336  | 1612.82422 | 807.4194 | 1612.81836 | 807.416443 | 2 | 17 | 18.6976 | NA    |
| 5 | 59.76 | 61.76 | 81.6 2-SEP_FlexIII | 99.0 TVQIEASTVEIEER                     | Label: 13C(6)15N(4)(R) @ 14                                                                        |                                | 0.00582336  | 1612.82422 | 807.4194 | 1612.81836 | 807.416443 | 2 | 16 | 19.8193 | NA    |
| 5 | 59.76 | 61.76 | 81.6 2-SEP_FlexIII | 99.0 TVQIEASTVEIEER                     | Label: 13C(6)15N(4)(R) @ 14                                                                        |                                | 0.0258429   | 1612.84424 | 807.4294 | 1612.81836 | 807.416443 | 2 | 13 | 19.556  | NA    |
| 5 | 59.76 | 61.76 | 81.6 2-SEP_FlexIII | 99.0 TVQIEASTVEIEER                     | Deamidated(Q) @ 3; Label: 13C(6)15N(4)(R) @ 14                                                     |                                | 0.0218068   | 1613.82422 | 807.9194 | 1613.80237 | 807.908447 | 2 | 13 | 18.4177 | NA    |
| 5 | 59.76 | 61.76 | 81.6 2-SEP_FlexIII | 99.0 TVQIEASTVEIEER                     | Deamidated(Q) @ 3; Label: 13C(6)15N(4)(R) @ 14                                                     |                                | 0.0218068   | 1613.82422 | 807.9194 | 1613.80237 | 807.908447 | 2 | 9  | 22.4069 | NA    |
| 5 | 59.76 | 61.76 | 81.6 2-SEP_FlexIII | 99.0 VHCCFYFISFGHGLKPLDVAFMK            | Propionamide(C) @ 3; Propionamide(C) @ 4; Label: 13C(6)15N(2)(K) @ 16; Label: 13C(6)15N(2)(K) @ 24 |                                | 0.00541028  | 2913.45581 | 972.1592 | 2913.45044 | 972.15741  | 3 | 13 | 19.6627 | NA    |
| 5 | 59.76 | 61.76 | 81.6 2-SEP_FlexIII | 99.0 VIPGAALNLR                         | Label: 13C(6)15N(4)(R) @ 11                                                                        |                                | -0.0003634  | 1091.63232 | 546.8234 | 1091.63269 | 546.823608 | 2 | 10 | 16.3465 | NA    |
| 5 | 59.76 | 61.76 | 81.6 2-SEP_FlexIII | 99.0 VNVNPIAK                           | Label: 13C(6)15N(2)(K) @ 9                                                                         |                                | -0.00024976 | 959.625671 | 480.8201 | 959.625916 | 480.820221 | 2 | 10 | 17.4939 | NA    |
| 5 | 59.76 | 61.76 | 81.6 2-SEP_FlexIII | 99.0 YLHDSGLNLR                         | Label: 13C(6)15N(4)(R) @ 10                                                                        |                                | 0.00097976  | 1212.57727 | 607.2959 | 1212.57629 | 607.29541  | 2 | 10 | 14.1037 | NA    |
| 5 | 59.76 | 61.76 | 81.6 2-SEP_FlexIII | 99.0 YLHDSGLNLR                         | Label: 13C(6)15N(4)(R) @ 10; Label: 13C(6)15N(4)(R) @ 11                                           |                                | -0.00126226 | 1378.68445 | 690.3495 | 1378.68567 | 690.350098 | 2 | 13 | 13.8027 | NA    |
| 5 | 59.76 | 61.76 | 81.6 2-SEP_FlexIII | 99.0 YPTFLYK                            | Label: 13C(6)15N(2)(K) @ 7                                                                         | cleaved V-Y @ N-term           | -0.00165037 | 938.497681 | 470.2561 | 938.499329 | 470.256928 | 2 | 9  | 18.0092 | NA    |
| 5 | 59.76 | 61.76 | 81.6 2-SEP_FlexIII | 99.0 YPTFLYK                            | Label: 13C(6)15N(2)(K) @ 7                                                                         | cleaved V-Y @ N-term           | 0.00020099  | 938.499451 | 470.257  | 938.499329 | 470.256928 | 2 | 9  | 17.9008 | NA    |
| 5 | 59.76 | 61.76 | 81.6 2-SEP_FlexIII | 99.0 YPTFLYK                            | Label: 13C(6)15N(2)(K) @ 7                                                                         | cleaved V-Y @ N-term           | -0.00091407 | 938.498474 | 470.2565 | 938.499329 | 470.256928 | 2 | 9  | 17.7612 | NA    |
| 6 | 58.66 | 60.67 | 85.0 ARRB1_FlexIII | 99.0 ACGVDVEYK                          | Propionamide(C) @ 2; Label: 13C(6)15N(2)(K) @ 9                                                    |                                | -0.00150376 | 1061.49292 | 531.7537 | 1061.49428 | 531.754395 | 2 | 10 | 15.4619 | 18.42 |
| 6 | 58.66 | 60.67 | 85.0 ARRB1_FlexIII | 99.0 AFCANLEEK                          | Propionamide(C) @ 3                                                                                |                                | -0.00344736 | 1223.5459  | 612.7802 | 1223.54919 | 612.781921 | 2 | 10 | 16.2171 | 18.42 |
| 6 | 58.66 | 60.67 | 85.0 ARRB1_FlexIII | 99.0 CPVAMEAADTVAPSSFTCK                | Propionamide(C) @ 1; Propionamide(C) @ 19; Label: 13C(6)15N(2)(K) @ 20                             |                                | -0.00137642 | 2249.97192 | 750.9979 | 2249.97339 | 750.998413 | 3 | 20 | 17.4012 | 18.42 |
| 6 | 58.66 | 60.67 | 85.0 ARRB1_FlexIII | 99.0 DFDVHIDLVPDVGVLVDPEYLK             | Label: 13C(6)15N(2)(K) @ 24                                                                        |                                | 0.00170252  | 2718.39014 | 907.1373 | 2718.38843 | 907.136719 | 3 | 22 | 20.4859 | 18.42 |
| 6 | 58.66 | 60.67 | 85.0 ARRB1_FlexIII | 99.0 DLFVANVQSFPAPADEK                  | Label: 13C(6)15N(2)(K) @ 17                                                                        |                                | 0.0039975   | 1880.94385 | 941.4792 | 1880.93994 | 941.477295 | 2 | 19 | 18.6201 | 18.42 |
| 6 | 58.66 | 60.67 | 85.0 ARRB1_FlexIII | 99.0 DLFVANVQSFPAPADEKKPLTR             | Label: 13C(6)15N(2)(K) @ 17; Label: 13C(6)15N(2)(K) @ 18; Label: 13C(6)15N(4)(R) @ 22              | missed K-K @ 17                | -0.0113058  | 2494.33179 | 624.5902 | 2494.34302 | 624.593018 | 4 | 15 | 17.7639 | 18.42 |
| 6 | 58.66 | 60.67 | 85.0 ARRB1_FlexIII | 99.0 EEPHREPVENETPVDTNLIELDTNDDIVFEDFAR | Label: 13C(6)15N(4)(R) @ 6; Deamidated(N) @ 18; Label: 13C(6)15N(4)(R) @ 36                        | missed R-E @ 6                 | 0.00665538  | 4229.93848 | 1058.492 | 4229.93018 | 1058.48987 | 4 | 20 | 19.7004 | 18.42 |
| 6 | 58.66 | 60.67 | 85.0 ARRB1_FlexIII | 99.0 EGANREILGIYSYK                     | Label: 13C(6)15N(4)(R) @ 5; Label: 13C(6)15N(2)(K) @ 15                                            | missed R-E @ 5                 | 0.00983644  | 1678.94702 | 840.4808 | 1678.93726 | 840.475891 | 2 | 18 | 18.8629 | 18.42 |
| 6 | 58.66 | 60.67 | 85.0 ARRB1_FlexIII | 99.0 EVPENETPVDTNLIELDTNDDIVFEDFAR      | Deamidated(N) @ 12; Label: 13C(6)15N(4)(R) @ 30                                                    |                                | 0.0122362   | 3474.58423 | 1159.202 | 3474.57129 | 1159.19775 | 3 | 18 | 20.2277 | 18.42 |
| 6 | 58.66 | 60.67 | 85.0 ARRB1_FlexIII | 99.0 GGLGLDASSDVAVELPFTLMHPKPK          | Label: 13C(6)15N(2)(K) @ 24; Label: 13C(6)15N(2)(K) @ 26                                           |                                | -0.00670818 | 2707.45264 | 677.8704 | 2707.45898 | 677.872009 | 4 | 22 | 20.3363 | 18.42 |
| 6 | 58.66 | 60.67 | 85.0 ARRB1_FlexIII | 99.0 GMKDDKEEEDGTGSPQLNLR               | Label: 13C(6)15N(2)(K) @ 3; Label: 13C(6)15N(2)(K) @ 6; Label: 13C(6)15N(4)(R) @ 21                | missed K-D @ 3; missed K-E @ 6 | 0.00493495  | 2374.0603  | 792.3607 | 2374.05542 | 792.35907  | 3 | 26 | 13.9026 | 18.42 |
| 6 | 58.66 | 60.67 | 85.0 ARRB1_FlexIII | 99.0 HEDTNLASSTLLR                      | Label: 13C(6)15N(4)(R) @ 13                                                                        |                                | -0.00012802 | 1465.74011 | 733.8773 | 1465.73999 | 733.877319 | 2 | 15 | 16.572  | 18.42 |
| 6 | 58.66 | 60.67 | 85.0 ARRB1_FlexIII | 99.0 KLGEHAYPFTFEIPNLPCSVTLQGPEDTGK     | Label: 13C(6)15N(2)(K) @ 1; Deamidated(N) @ 16; Propionamide(C) @ 19; Label: 13C(6)15N(2)(K) @ 32  | missed K-L @ 1                 | 0.0027226   | 3569.7749  | 893.451  | 3569.77222 | 893.450378 | 4 | 16 | 19.6734 | 18.42 |
| 6 | 58.66 | 60.67 | 85.0 ARRB1_FlexIII | 99.0 KVQYAPERPGPQPTAETTR                | Label: 13C(6)15N(2)(K) @ 1; Label: 13C(6)15N(4)(R) @ 8; Label: 13C(6)15N(4)(R) @ 19                | missed K-V @ 1                 | -0.00371689 | 2153.11865 | 718.7135 | 2153.12231 | 718.714722 | 3 | 13 | 16.6095 | 18.42 |
| 6 | 58.66 | 60.67 | 85.0 ARRB1_FlexIII | 99.0 LGEHAYPFTFEIPNLPCSVTLQGPEDTGK      | Deamidated(N) @ 15; Propionamide(C) @ 18; Label: 13C(6)15N(2)(K) @ 31                              |                                | 0.0303038   | 3433.69434 | 1145.572 | 3433.66309 | 1145.56165 | 3 | 20 | 19.8648 | 18.42 |
| 6 | 58.66 | 60.67 | 85.0 ARRB1_FlexIII | 99.0 LKHEDTNLASSTLLR                    | Label: 13C(6)15N(2)(K) @ 2; Label: 13C(6)15N(4)(R) @ 15                                            | missed K-H @ 2                 | -0.00259197 | 1714.93066 | 572.6508 | 1714.93323 | 572.651672 | 3 | 16 | 16.3467 | 18.42 |
| 6 | 58.66 | 60.67 | 85.0 ARRB1_FlexIII | 99.0 LTVYLGK                            |                                                                                                    |                                | -0.00298052 | 792.471497 | 397.243  | 792.474548 | 397.244537 | 2 | 8  | 16.889  | 18.42 |
| 6 | 58.66 | 60.67 | 85.0 ARRB1_FlexIII | 99.0 QFLMSDKPLHEASLDK                   | Gln->pyro-Glu @ N-term; Label: 13C(6)15N(2)(K) @ 7; Label: 13C(6)15N(2)(K) @ 17                    |                                | 0.00360281  | 1970.01904 | 657.6803 | 1970.01538 | 657.679077 | 3 | 14 | 18.8717 | 18.42 |
| 6 | 58.66 | 60.67 | 85.0 ARRB1_FlexIII | 99.0 QYADICLNTAQYK                      | Gln->pyro-Glu @ N-term; Propionamide(C) @ 6; Label: 13C(6)15N(2)(K) @ 14                           |                                | -0.00430814 | 1738.80725 | 870.4109 | 1738.81165 | 870.413086 | 2 | 12 | 16.4278 | 18.42 |
| 6 | 58.66 | 60.67 | 85.0 ARRB1_FlexIII | 99.0 RDFVDHIDLVPDVGVLVDPEYLK            | Label: 13C(6)15N(4)(R) @ 1; Label: 13C(6)15N(2)(K) @ 25                                            | missed R-D @ 1                 | 0.0141827   | 2884.51196 | 962.5112 | 2884.4978  | 962.506531 | 3 | 17 | 19.7793 | 18.42 |
| 6 | 58.66 | 60.67 | 85.0 ARRB1_FlexIII | 99.0 RYVYLTCAFR                         | Label: 13C(6)15N(                                                                                  |                                |             |            |          |            |            |   |    |         |       |

|   |       |       |      |               |      |                                      |                                                                                                          |             |            |          |            |            |   |    |         |       |
|---|-------|-------|------|---------------|------|--------------------------------------|----------------------------------------------------------------------------------------------------------|-------------|------------|----------|------------|------------|---|----|---------|-------|
| 6 | 58.66 | 60.67 | 85.0 | ARRB1_FlexIII | 99.0 | CPVAMEEADDTVAPSSTFC                  | Propionamide(C) @ 1; Propionamide(C) @ 19; Label: 13C(6)15N(2)(K) @ 20                                   | 0.00285876  | 2249.97534 | 1125.995 | 2249.97339 | 1125.99402 | 2 | 28 | 17.1199 | 18.42 |
| 6 | 58.66 | 60.67 | 85.0 | ARRB1_FlexIII | 99.0 | CPVAMEEADDTVAPSSTFC                  | Propionamide(C) @ 1; Propionamide(C) @ 19; Label: 13C(6)15N(2)(K) @ 20                                   | 0.00649714  | 2249.97974 | 751.0005 | 2249.97339 | 750.998413 | 3 | 20 | 17.1403 | 18.42 |
| 6 | 58.66 | 60.67 | 85.0 | ARRB1_FlexIII | 99.0 | CPVAMEEADDTVAPSSTFC                  | Propionamide(C) @ 1; Propionamide(C) @ 19; Label: 13C(6)15N(2)(K) @ 20                                   | 0.00066149  | 2249.97339 | 1125.994 | 2249.97339 | 1125.99402 | 2 | 27 | 17.4028 | 18.42 |
| 6 | 58.66 | 60.67 | 85.0 | ARRB1_FlexIII | 99.0 | CPVAMEEADDTVAPSSTFC                  | Propionamide(C) @ 1; Propionamide(C) @ 19; Label: 13C(6)15N(2)(K) @ 20                                   | 0.00649714  | 2249.97974 | 751.0005 | 2249.97339 | 750.998413 | 3 | 15 | 21.67   | 18.42 |
| 6 | 58.66 | 60.67 | 85.0 | ARRB1_FlexIII | 99.0 | CPVAMEEADDTVAPSSTFC                  | Propionamide(C) @ 1; Propionamide(C) @ 19; Label: 13C(6)15N(2)(K) @ 20                                   | 0.00649714  | 2249.97974 | 751.0005 | 2249.97339 | 750.998413 | 3 | 14 | 22.3405 | 18.42 |
| 6 | 58.66 | 60.67 | 85.0 | ARRB1_FlexIII | 99.0 | CPVAMEEADDTVAPSSTFC                  | Propionamide(C) @ 1; Propionamide(C) @ 19; Label: 13C(6)15N(2)(K) @ 20                                   | 0.00649714  | 2249.97974 | 751.0005 | 2249.97339 | 750.998413 | 3 | 13 | 22.6206 | 18.42 |
| 6 | 58.66 | 60.67 | 85.0 | ARRB1_FlexIII | 99.0 | CPVAMEEADDTVAPSSTFC                  | Propionamide(C) @ 1; Propionamide(C) @ 19; Label: 13C(6)15N(2)(K) @ 20                                   | 0.00649714  | 2249.97974 | 751.0005 | 2249.97339 | 750.998413 | 3 | 13 | 22.9278 | 18.42 |
| 6 | 58.66 | 60.67 | 85.0 | ARRB1_FlexIII | 99.0 | CPVAMEEADDTVAPSSTFC                  | Propionamide(C) @ 1; Propionamide(C) @ 19; Label: 13C(6)15N(2)(K) @ 20                                   | -0.00446548 | 2249.96924 | 1125.992 | 2249.97339 | 1125.99402 | 2 | 9  | 21.5579 | 18.42 |
| 6 | 58.66 | 60.67 | 85.0 | ARRB1_FlexIII | 99.0 | DLFVANVQSFPAPAEK                     | Label: 13C(6)15N(2)(K) @ 17                                                                              | 0.00778169  | 1880.94763 | 941.4811 | 1880.93994 | 941.477295 | 2 | 18 | 19.1252 | 18.42 |
| 6 | 58.66 | 60.67 | 85.0 | ARRB1_FlexIII | 99.0 | DLFVANVQSFPAPAEKKPLTR                | Deamidated(Q) @ 8; Label: 13C(6)15N(2)(K) @ 17; Label: 13C(6)15N(2)(K) @ 18; Label: 13C(6)15N(4)(R) @ 22 | 0.0235654   | 2495.35059 | 832.7908 | 2495.32715 | 832.782959 | 3 | 17 | 17.7657 | 18.42 |
| 6 | 58.66 | 60.67 | 85.0 | ARRB1_FlexIII | 99.0 | DLFVANVQSFPAPAEKKPLTR                | Deamidated(Q) @ 8; Label: 13C(6)15N(2)(K) @ 17; Label: 13C(6)15N(2)(K) @ 18; Label: 13C(6)15N(4)(R) @ 22 | 0.00468177  | 2495.33179 | 624.8402 | 2495.32715 | 624.83905  | 4 | 16 | 18.264  | 18.42 |
| 6 | 58.66 | 60.67 | 85.0 | ARRB1_FlexIII | 99.0 | DLFVANVQSFPAPAEKKPLTR                | Label: 13C(6)15N(2)(K) @ 17; Label: 13C(6)15N(2)(K) @ 18; Label: 13C(6)15N(4)(R) @ 22                    | -0.00371367 | 2494.33911 | 832.4537 | 2494.34302 | 832.454956 | 3 | 17 | 18.3052 | 18.42 |
| 6 | 58.66 | 60.67 | 85.0 | ARRB1_FlexIII | 99.0 | DLFVANVQSFPAPAEKKPLTR                | Deamidated(Q) @ 8; Label: 13C(6)15N(2)(K) @ 17; Label: 13C(6)15N(2)(K) @ 18; Label: 13C(6)15N(4)(R) @ 22 | 0.0235654   | 2495.35059 | 832.7908 | 2495.32715 | 832.782959 | 3 | 14 | 18.0346 | 18.42 |
| 6 | 58.66 | 60.67 | 85.0 | ARRB1_FlexIII | 99.0 | EGANREILGIIVSYK                      | Label: 13C(6)15N(4)(R) @ 5; Label: 13C(6)15N(2)(K) @ 15                                                  | -0.00910826 | 1678.92822 | 560.65   | 1678.93726 | 560.653015 | 3 | 14 | 18.8875 | 18.42 |
| 6 | 58.66 | 60.67 | 85.0 | ARRB1_FlexIII | 99.0 | EVPENETPVDTLNIELDTNDDDIVFEDFAR       | Label: 13C(6)15N(4)(R) @ 30                                                                              | 0.00638049  | 3473.59399 | 1158.872 | 3473.5874  | 1158.86975 | 3 | 14 | 20.497  | 18.42 |
| 6 | 58.66 | 60.67 | 85.0 | ARRB1_FlexIII | 99.0 | EVPENETPVDTLNIELDTNDDDIVFEDFAR       | Deamidated(N) @ 19; Label: 13C(6)15N(4)(R) @ 30                                                          | 0.0122362   | 3474.58423 | 1159.202 | 3474.57129 | 1159.19775 | 3 | 7  | 26.4506 | 18.42 |
| 6 | 58.66 | 60.67 | 85.0 | ARRB1_FlexIII | 99.0 | GMKDDKEEEDGTGSPQLNNR                 | Label: 13C(6)15N(2)(K) @ 3; Label: 13C(6)15N(2)(K) @ 6; Deamidated(Q) @ 17; Label: 13C(6)15N(4)(R) @ 21  | -0.0119876  | 2375.05127 | 594.7701 | 2375.03931 | 594.76709  | 4 | 14 | 13.8796 | 18.42 |
| 6 | 58.66 | 60.67 | 85.0 | ARRB1_FlexIII | 99.0 | HEDTNLASSTLLR                        | Label: 13C(6)15N(4)(R) @ 13                                                                              | 0.0073861   | 1465.74756 | 489.5898 | 1465.73999 | 489.58728  | 3 | 14 | 16.6774 | 18.42 |
| 6 | 58.66 | 60.67 | 85.0 | ARRB1_FlexIII | 99.0 | KLGEHAYFTFEIPPNLPCSVTLQGPEDTGK       | Label: 13C(6)15N(2)(K) @ 1; Deamidated(N) @ 16; Propionamide(C) @ 19; Label: 13C(6)15N(2)(K) @ 32        | 0.031555    | 3569.8042  | 1190.942 | 3569.77222 | 1190.9314  | 3 | 23 | 19.1905 | 18.42 |
| 6 | 58.66 | 60.67 | 85.0 | ARRB1_FlexIII | 99.0 | KVQYAPERGPQPTAETTR                   | Label: 13C(6)15N(2)(K) @ 1; Label: 13C(6)15N(4)(R) @ 8; Deamidated(Q) @ 12; Label: 13C(6)15N(4)(R) @ 19  | 0.0221821   | 2154.1294  | 1078.072 | 2154.10645 | 1078.06043 | 2 | 13 | 14.4103 | 18.42 |
| 6 | 58.66 | 60.67 | 85.0 | ARRB1_FlexIII | 99.0 | KVQYAPERGPQPTAETTR                   | Label: 13C(6)15N(2)(K) @ 1; Label: 13C(6)15N(4)(R) @ 8; Label: 13C(6)15N(4)(R) @ 19                      | 0.00810022  | 2153.13062 | 539.2899 | 2153.12231 | 539.287842 | 4 | 12 | 14.3274 | 18.42 |
| 6 | 58.66 | 60.67 | 85.0 | ARRB1_FlexIII | 99.0 | KVQYAPERGPQPTAETTR                   | Label: 13C(6)15N(2)(K) @ 1; Label: 13C(6)15N(4)(R) @ 8; Label: 13C(6)15N(4)(R) @ 19                      | -0.0126891  | 2153.10962 | 718.1005 | 2153.12231 | 718.114722 | 3 | 12 | 14.347  | 18.42 |
| 6 | 58.66 | 60.67 | 85.0 | ARRB1_FlexIII | 99.0 | KVQYAPERGPQPTAETTR                   | Label: 13C(6)15N(2)(K) @ 1; Label: 13C(6)15N(4)(R) @ 8; Label: 13C(6)15N(4)(R) @ 19                      | 0.00810022  | 2153.13062 | 539.2899 | 2153.12231 | 539.287842 | 4 | 11 | 14.5885 | 18.42 |
| 6 | 58.66 | 60.67 | 85.0 | ARRB1_FlexIII | 99.0 | LKHEDTNLASSTLLR                      | Label: 13C(6)15N(2)(K) @ 2; Label: 13C(6)15N(4)(R) @ 15                                                  | -0.00403199 | 1714.93286 | 858.4737 | 1714.93323 | 858.473938 | 2 | 22 | 16.1249 | 18.42 |
| 6 | 58.66 | 60.67 | 85.0 | ARRB1_FlexIII | 99.0 | LKHEDTNLASSTLLR                      | Label: 13C(6)15N(2)(K) @ 2; Label: 13C(6)15N(4)(R) @ 15                                                  | 0.00066664  | 1714.93384 | 858.4742 | 1714.93323 | 858.473938 | 2 | 16 | 16.3988 | 18.42 |
| 6 | 58.66 | 60.67 | 85.0 | ARRB1_FlexIII | 99.0 | LKHEDTNLASSTLLR                      | Label: 13C(6)15N(2)(K) @ 2; Label: 13C(6)15N(4)(R) @ 15                                                  | -0.00497235 | 1714.92822 | 572.85   | 1714.93323 | 572.851672 | 3 | 14 | 16.0766 | 18.42 |
| 6 | 58.66 | 60.67 | 85.0 | ARRB1_FlexIII | 99.0 | LKHEDTNLASSTLLR                      | Label: 13C(6)15N(2)(K) @ 2; Label: 13C(6)15N(4)(R) @ 15                                                  | -0.0041416  | 1714.92932 | 429.7396 | 1714.93323 | 429.740601 | 4 | 12 | 16.0797 | 18.42 |
| 6 | 58.66 | 60.67 | 85.0 | ARRB1_FlexIII | 99.0 | LKHEDTNLASSTLLR                      | Label: 13C(6)15N(2)(K) @ 2; Label: 13C(6)15N(4)(R) @ 15                                                  | -0.0041416  | 1714.92932 | 429.7396 | 1714.93323 | 429.740601 | 4 | 11 | 16.3479 | 18.42 |
| 6 | 58.66 | 60.67 | 85.0 | ARRB1_FlexIII | 99.0 | QYADICLNFNTAQYK                      | Propionamide(C) @ 6; Label: 13C(6)15N(2)(K) @ 14                                                         | 0.00410841  | 1755.84239 | 878.9284 | 1755.83814 | 878.926331 | 2 | 17 | 18.6004 | 18.42 |
| 6 | 58.66 | 60.67 | 85.0 | ARRB1_FlexIII | 99.0 | QYADICLNFNTAQYK                      | Gln->pyro-Glu @ N-term; Propionamide(C) @ 6; Label: 13C(6)15N(2)(K) @ 14                                 | -0.00430814 | 1738.80725 | 870.4109 | 1738.81165 | 870.413086 | 2 | 16 | 19.7026 | 18.42 |
| 6 | 58.66 | 60.67 | 85.0 | ARRB1_FlexIII | 99.0 | QYADICLNFNTAQYK                      | Propionamide(C) @ 6; Label: 13C(6)15N(2)(K) @ 14                                                         | 0.00261982  | 1755.84058 | 586.2875 | 1755.83814 | 586.286682 | 3 | 11 | 18.7415 | 18.42 |
| 6 | 58.66 | 60.67 | 85.0 | ARRB1_FlexIII | 99.0 | RVVYTLTCAFR                          | Label: 13C(6)15N(4)(R) @ 1; Propionamide(C) @ 8; Label: 13C(6)15N(4)(R) @ 11                             | 0.00564739  | 1418.76074 | 710.3904 | 1418.76074 | 710.387634 | 2 | 14 | 17.9353 | 18.42 |
| 6 | 58.66 | 60.67 | 85.0 | ARRB1_FlexIII | 99.0 | RVVYTLTCAFR                          | Label: 13C(6)15N(4)(R) @ 1; Propionamide(C) @ 8; Label: 13C(6)15N(4)(R) @ 11                             | 0.00653917  | 1418.76721 | 473.9297 | 1418.76074 | 473.927521 | 3 | 13 | 17.6698 | 18.42 |
| 6 | 58.66 | 60.67 | 85.0 | ARRB1_FlexIII | 99.0 | RVVYTLTCAFR                          | Label: 13C(6)15N(4)(R) @ 1; Propionamide(C) @ 8; Label: 13C(6)15N(4)(R) @ 11                             | 0.00653917  | 1418.76721 | 473.9297 | 1418.76074 | 473.927521 | 3 | 13 | 17.9672 | 18.42 |
| 6 | 58.66 | 60.67 | 85.0 | ARRB1_FlexIII | 99.0 | VQYAPERGPQPTAETTR                    | Label: 13C(6)15N(4)(R) @ 7; Deamidated(Q) @ 11; Label: 13C(6)15N(4)(R) @ 18                              | 0.0110432   | 2018.00745 | 1010.011 | 2017.99719 | 1010.00586 | 2 | 13 | 14.8451 | 18.42 |
| 6 | 58.66 | 60.67 | 85.0 | ARRB1_FlexIII | 99.0 | VYTLTPLFANNR                         | Label: 13C(6)15N(4)(R) @ 12                                                                              | -0.00100304 | 1417.7583  | 709.8864 | 1417.75928 | 709.886963 | 2 | 14 | 18.8405 | 18.42 |
| 6 | 58.66 | 60.67 | 85.0 | ARRB1_FlexIII | 99.0 | VYTLTPLFANNR                         | Label: 13C(6)15N(4)(R) @ 12                                                                              | -0.00307147 | 1417.75635 | 473.5927 | 1417.75928 | 473.59372  | 3 | 13 | 18.8663 | 18.42 |
| 6 | 58.66 | 60.67 | 85.0 | ARRB1_FlexIII | 99.0 | VYTLTPLFANNR                         | Deamidated(N) @ 10; Label: 13C(6)15N(4)(R) @ 12                                                          | 0.00106846  | 1418.74451 | 710.3795 | 1418.74329 | 710.378967 | 2 | 13 | 19.0989 | 18.42 |
| 6 | 58.66 | 60.67 | 85.0 | ARRB1_FlexIII | 99.0 | YGREDDVLGLTFRK                       | Label: 13C(6)15N(4)(R) @ 3; Label: 13C(6)15N(4)(R) @ 14                                                  | -0.00065556 | 1672.86816 | 558.63   | 1672.86877 | 558.630188 | 3 | 12 | 19.4439 | 18.42 |
| 6 | 58.66 | 60.67 | 85.0 | ARRB1_FlexIII | 99.0 | YGREDDVLGLTFRK                       | Label: 13C(6)15N(4)(R) @ 3; Label: 13C(6)15N(4)(R) @ 14; Label: 13C(6)15N(2)(K) @ 15                     | 0.00059566  | 1808.97852 | 604.0001 | 1808.97791 | 603.999939 | 3 | 14 | 18.3086 | 18.42 |
| 6 | 58.66 | 60.67 | 85.0 | ARRB1_FlexIII | 99.0 | YPTFLYK                              | Label: 13C(6)15N(2)(K) @ 7                                                                               | -0.00165037 | 938.497681 | 470.2561 | 938.499329 | 470.256928 | 2 | 9  | 18.0092 | 18.42 |
| 6 | 58.66 | 60.67 | 85.0 | ARRB1_FlexIII | 99.0 | YPTFLYK                              | Label: 13C(6)15N(2)(K) @ 7                                                                               | 0.00020099  | 938.499451 | 470.257  | 938.499329 | 470.256928 | 2 | 9  | 17.9008 | 18.42 |
| 6 | 58.66 | 60.67 | 85.0 | ARRB1_FlexIII | 99.0 | YPTFLYK                              | Label: 13C(6)15N(2)(K) @ 7                                                                               | -0.0091407  | 938.498474 | 470.2565 | 938.499329 | 470.256928 | 2 | 9  | 17.7612 | 18.42 |
| 8 | 55.19 | 57.27 | 53.1 | CALU_FlexIII  | 99.0 | DGCVFTVDELKDWKI                      | Label: 13C(6)15N(2)(K) @ 10; Label: 13C(6)15N(2)(K) @ 14                                                 | -0.00287717 | 1679.87146 | 560.9644 | 1679.87415 | 560.965332 | 3 | 10 | 19.8788 | 7.97  |
| 8 | 55.19 | 57.27 | 53.1 | CALU_FlexIII  | 99.0 | DRVHHEPQLSDK                         | Label: 13C(6)15N(4)(R) @ 2; Label: 13C(6)15N(2)(K) @ 12                                                  | 0.00659754  | 1477.74585 | 739.8802 | 1477.73926 | 739.876892 | 2 | 9  | 11.0754 | 7.97  |
| 8 | 55.19 | 57.27 | 53.1 | CALU_FlexIII  | 99.0 | DRVHHEPQLSDKVHNDQAQSFYDHDHDAFLGAEEAK | Label: 13C(6)15N(4)(R) @ 2; Label: 13C(6)15N(2)(K) @ 12; Deamidated(N) @ 15; Label: 13C(6)15N(2)(K) @ 34 | 0.0160719   | 3946.81567 | 790.3704 | 3946.79932 | 790.367127 | 5 | 13 | 16.5659 | 7.97  |
| 8 | 55.19 | 57.27 | 53.1 | CALU_FlexIII  | 99.0 | EEFTAFHLPEEYDYMK                     | Label: 13C(6)15N(2)(K) @ 16                                                                              | 0.00671532  | 2055.90845 | 686.3101 | 2055.90161 | 686.3078   | 3 | 12 | 18.9428 | 7.97  |
| 8 | 55.19 | 57.27 | 53.1 | CALU_FlexIII  | 99.0 | EEIVDKYDLFVGSQATDFGEALVR             | Label: 13C(6)15N(2)(K) @ 6; Label: 13C(6)15N(4)(R) @ 24                                                  | 0.00367214  | 2718.35449 | 907.1254 | 2718.35083 | 907.124207 | 3 | 24 | 19.8374 | 7.97  |
| 8 | 55.19 | 57.27 | 53.1 | CALU_FlexIII  | 99.0 | EQFVEFRDK                            | Label: 13C(6)15N(4)(R) @ 7; Label: 13C(6)15N(2)(K) @ 9                                                   | 0.00240576  | 1214.60742 | 608.311  | 1214.6051  | 608.309815 | 2 | 11 | 16.2464 | 7.97  |
| 8 | 55.19 | 57.27 | 53.1 | CALU_FlexIII  | 99.0 | GHDNLNEDGLSWEEYK                     | Label: 13C(6)15N(2)(K) @ 10                                                                              | -0.0058652  | 1889.83752 | 630.9531 | 1889.84314 | 630.955017 | 3 | 19 | 17.9472 | 7.97  |
| 8 | 55.19 | 57.27 | 53.1 | CALU_FlexIII  | 99.0 | HLVYESDONK                           | Label: 13C(6)15N(2)(K) @ 10; Label: 13C(6)15N(2)(K) @ 13                                                 | 0.00758291  | 1239.6051  | 620.8098 | 1239.59753 | 620.80603  | 2 | 16 | 13.5332 | 7.97  |
| 8 | 55.19 | 57.27 | 53.1 | CALU_FlexIII  | 99.0 | HLVYESDONKDGK                        | Label: 13C(6)15N(2)(K) @ 10; Label: 13C(6)15N(2)(K) @ 13; Label: 13C(6)15N(2)(K) @ 16                    | -0.00901021 | 1547.74609 | 774.8803 | 1547.75513 | 774.884827 | 2 | 14 | 12.8444 | 7.97  |
| 8 | 55.19 | 57.27 | 53.1 | CALU_FlexIII  | 99.0 | HLVYESDONKDKLTK                      | Label: 13C(6)15N(2)(K) @ 10; Label: 13C(6)15N(2)(K) @ 13; Label: 13C(6)15N(2)(K) @ 16                    | 0.00327048  | 1897.99927 | 633.6737 | 1897.99597 | 633.672607 | 3 | 19 | 13.8973 | 7.97  |
| 8 | 55.19 | 57.27 | 53.1 | CALU_FlexIII  | 99.0 | IDGDKDGFVTVDLTK                      | Label: 13C(6)15N(2)(K) @ 5; Label: 13C(6)15N(2)(K) @ 15                                                  | 0.0031874   | 1665.84644 | 833.9    |            |            |   |    |         |       |

|   |       |       |                  |                                         |                                                                                                   |                              |             |            |          |            |            |   |    |         |      |
|---|-------|-------|------------------|-----------------------------------------|---------------------------------------------------------------------------------------------------|------------------------------|-------------|------------|----------|------------|------------|---|----|---------|------|
| 8 | 55.19 | 57.27 | 53.1 CALU_FlexII | 99.0 WIYEDVER                           | Label: 13C(6)15N(4)(R)@8                                                                          |                              | -0.00120878 | 1118.52612 | 560.2703 | 1118.52722 | 560.270874 | 2 | 10 | 17.297  | 7.97 |
| 8 | 55.19 | 57.27 | 53.1 CALU_FlexII | 99.0 YDLFVGSQATDFGEALVR                 | Label: 13C(6)15N(4)(R)@18                                                                         |                              | 0.0104889   | 1996.98743 | 999.501  | 1996.97693 | 999.495789 | 2 | 19 | 19.9351 | 7.97 |
| 8 | 55.19 | 57.27 | 53.1 CALU_FlexII | 99.0 VHNDQAQSFYDHDAFLGAEAAKFDQLTPEEKSER | Label: 13C(6)15N(2)(K)@22; Deamidated(Q)@26; Label: 13C(6)15N(2)(K)@33; Label: 13C(6)15N(4)(R)@35 | missed K-T@22; missed K-E@33 | 0.0306546   | 4065.86572 | 814.1804 | 4065.83496 | 814.174316 | 5 | 12 | 17.9625 | 7.97 |
| 8 | 55.19 | 57.27 | 53.1 CALU_FlexII | 99.0 DRVHHPEOLSDK                       | Label: 13C(6)15N(4)(R)@2; Label: 13C(6)15N(2)(K)@12                                               | missed R-V@2                 | -0.00122788 | 1477.73804 | 493.5866 | 1477.73926 | 493.587036 | 3 | 12 | 11.1183 | 7.97 |
| 8 | 55.19 | 57.27 | 53.1 CALU_FlexII | 99.0 DRVHHPEOLSDK                       | Label: 13C(6)15N(4)(R)@2; Label: 13C(6)15N(2)(K)@12                                               | missed R-V@2                 | 0.007195    | 1477.74634 | 493.5894 | 1477.73926 | 493.587036 | 3 | 11 | 10.7557 | 7.97 |
| 8 | 55.19 | 57.27 | 53.1 CALU_FlexII | 99.0 EEIVDKYDLFVGSQATDFGEALVR           | Label: 13C(6)15N(2)(K)@6; Deamidated(Q)@14; Label: 13C(6)15N(4)(R)@24                             | missed K-Y@6                 | 0.0256411   | 2719.3606  | 907.4608 | 2719.33472 | 907.45221  | 3 | 19 | 19.5794 | 7.97 |
| 8 | 55.19 | 57.27 | 53.1 CALU_FlexII | 99.0 EEIVDKYDLFVGSQATDFGEALVR           | Label: 13C(6)15N(2)(K)@6; Deamidated(Q)@14; Label: 13C(6)15N(4)(R)@24                             | missed K-Y@6                 | 0.0150644   | 2719.34937 | 1360.682 | 2719.33472 | 1360.67468 | 2 | 18 | 19.7009 | 7.97 |
| 8 | 55.19 | 57.27 | 53.1 CALU_FlexII | 99.0 EEIVDKYDLFVGSQATDFGEALVR           | Label: 13C(6)15N(2)(K)@6; Label: 13C(6)15N(4)(R)@24                                               | missed K-Y@6                 | 0.0196024   | 2718.37012 | 907.1307 | 2718.35083 | 907.124207 | 3 | 12 | 26.5606 | 7.97 |
| 8 | 55.19 | 57.27 | 53.1 CALU_FlexII | 99.0 EEIVDKYDLFVGSQATDFGEALVR           | Label: 13C(6)15N(2)(K)@6; Label: 13C(6)15N(4)(R)@24                                               | missed K-Y@6                 | -0.00959396 | 2718.34473 | 907.1222 | 2718.35083 | 907.124207 | 3 | 22 | 19.664  | 7.97 |
| 8 | 55.19 | 57.27 | 53.1 CALU_FlexII | 99.0 EEIVDKYDLFVGSQATDFGEALVR           | Label: 13C(6)15N(2)(K)@6; Label: 13C(6)15N(4)(R)@24                                               | missed K-Y@6                 | -0.010427   | 2718.34033 | 907.1207 | 2718.35083 | 907.124207 | 3 | 7  | 26.9078 | 7.97 |
| 8 | 55.19 | 57.27 | 53.1 CALU_FlexII | 99.0 EEIVDKYDLFVGSQATDFGEALVR           | Label: 13C(6)15N(2)(K)@6; Deamidated(Q)@14; Label: 13C(6)15N(4)(R)@24                             | missed K-Y@6                 | 0.0256411   | 2719.3606  | 907.4608 | 2719.33472 | 907.45221  | 3 | 12 | 20.445  | 7.97 |
| 8 | 55.19 | 57.27 | 53.1 CALU_FlexII | 99.0 EEIVDKYDLFVGSQATDFGEALVR           | Label: 13C(6)15N(2)(K)@6; Deamidated(Q)@14; Label: 13C(6)15N(4)(R)@24                             | missed K-Y@6                 | 0.0256411   | 2719.3606  | 907.4608 | 2719.33472 | 907.45221  | 3 | 10 | 21.1049 | 7.97 |
| 8 | 55.19 | 57.27 | 53.1 CALU_FlexII | 99.0 GHDLNEDGLWSWEEK                    | Label: 13C(6)15N(2)(K)@16                                                                         |                              | -0.00130136 | 1897.85608 | 633.626  | 1897.85742 | 633.626404 | 3 | 20 | 17.825  | 7.97 |
| 8 | 55.19 | 57.27 | 53.1 CALU_FlexII | 99.0 GHDLNEDGLWSWEEK                    | Label: 13C(6)15N(2)(K)@16                                                                         |                              | 0.00394386  | 1889.84705 | 945.9308 | 1889.84314 | 945.928833 | 2 | 24 | 17.9714 | 7.97 |
| 8 | 55.19 | 57.27 | 53.1 CALU_FlexII | 99.0 GHDLNEDGLWSWEEK                    | Label: 13C(6)15N(2)(K)@16                                                                         |                              | -0.00107485 | 1897.85632 | 949.9354 | 1897.85742 | 949.935974 | 2 | 25 | 18.0777 | 7.97 |
| 8 | 55.19 | 57.27 | 53.1 CALU_FlexII | 99.0 GHDLNEDGLWSWEEK                    | Label: 13C(6)15N(2)(K)@16                                                                         |                              | 0.0104174   | 1897.8678  | 633.6299 | 1897.85742 | 633.626404 | 3 | 18 | 18.0994 | 7.97 |
| 8 | 55.19 | 57.27 | 53.1 CALU_FlexII | 99.0 GHDLNEDGLWSWEEK                    | Label: 13C(6)15N(2)(K)@16                                                                         |                              | 0.00978944  | 1897.86731 | 949.9409 | 1897.85742 | 949.935974 | 2 | 15 | 21.0188 | 7.97 |
| 8 | 55.19 | 57.27 | 53.1 CALU_FlexII | 99.0 GHDLNEDGLWSWEEK                    | Label: 13C(6)15N(2)(K)@16                                                                         |                              | 0.00978944  | 1897.86731 | 949.9409 | 1897.85742 | 949.935974 | 2 | 13 | 21.3832 | 7.97 |
| 8 | 55.19 | 57.27 | 53.1 CALU_FlexII | 99.0 GHDLNEDGLWSWEEK                    | Label: 13C(6)15N(2)(K)@16                                                                         |                              | 0.00978944  | 1897.86731 | 949.9409 | 1897.85742 | 949.935974 | 2 | 13 | 18.4808 | 7.97 |
| 8 | 55.19 | 57.27 | 53.1 CALU_FlexII | 99.0 GHDLNEDGLWSWEEK                    | Deamidated(N)@5; Label: 13C(6)15N(2)(K)@16                                                        |                              | 0.025777    | 1898.86731 | 950.4409 | 1898.84143 | 950.427979 | 2 | 10 | 21.6704 | 7.97 |
| 8 | 55.19 | 57.27 | 53.1 CALU_FlexII | 99.0 GHDLNEDGLWSWEEK                    | Deamidated(N)@5; Label: 13C(6)15N(2)(K)@16                                                        |                              | 0.0164562   | 1898.85791 | 633.9599 | 1898.84143 | 633.954407 | 3 | 11 | 26.6288 | 7.97 |
| 8 | 55.19 | 57.27 | 53.1 CALU_FlexII | 99.0 GHDLNEDGLWSWEEK                    | Label: 13C(6)15N(2)(K)@16                                                                         |                              | 0.0104174   | 1897.8678  | 633.6299 | 1897.85742 | 633.626404 | 3 | 11 | 21.48   | 7.97 |
| 8 | 55.19 | 57.27 | 53.1 CALU_FlexII | 99.0 GHDLNEDGLWSWEEK                    | Deamidated(N)@5; Label: 13C(6)15N(2)(K)@16                                                        |                              | 0.0164562   | 1898.85791 | 633.9599 | 1898.84143 | 633.954407 | 3 | 12 | 20.966  | 7.97 |
| 8 | 55.19 | 57.27 | 53.1 CALU_FlexII | 99.0 GHDLNEDGLWSWEEK                    | Label: 13C(6)15N(2)(K)@16                                                                         |                              | 0.0104174   | 1897.8678  | 633.6299 | 1897.85742 | 633.626404 | 3 | 7  | 26.9123 | 7.97 |
| 8 | 55.19 | 57.27 | 53.1 CALU_FlexII | 99.0 HLYVESDNQKDGK                      | Label: 13C(6)15N(2)(K)@10; Label: 13C(6)15N(2)(K)@13                                              | missed K-D@10                | 0.0115763   | 1547.76672 | 516.9295 | 1547.75513 | 516.925659 | 3 | 17 | 11.7335 | 7.97 |
| 8 | 55.19 | 57.27 | 53.1 CALU_FlexII | 99.0 HLYVESDNQKDGK                      | Label: 13C(6)15N(2)(K)@10; Label: 13C(6)15N(2)(K)@13                                              | missed K-D@10                | -0.00124109 | 1547.75386 | 516.9252 | 1547.75513 | 516.925659 | 3 | 18 | 11.9928 | 7.97 |
| 8 | 55.19 | 57.27 | 53.1 CALU_FlexII | 99.0 HLYVESDNQKDGK                      | Label: 13C(6)15N(2)(K)@10; Label: 13C(6)15N(2)(K)@13                                              | missed K-D@10                | -0.00022112 | 1547.75488 | 774.8847 | 1547.75513 | 774.884827 | 2 | 19 | 12.0321 | 7.97 |
| 8 | 55.19 | 57.27 | 53.1 CALU_FlexII | 99.0 HLYVESDNQKDGK                      | Label: 13C(6)15N(2)(K)@10; Label: 13C(6)15N(2)(K)@13                                              | missed K-D@10                | -0.0016073  | 1547.75354 | 516.9251 | 1547.75513 | 516.925659 | 3 | 18 | 12.2563 | 7.97 |
| 8 | 55.19 | 57.27 | 53.1 CALU_FlexII | 99.0 HLYVESDNQKDGK                      | Label: 13C(6)15N(2)(K)@10; Label: 13C(6)15N(2)(K)@13                                              | missed K-D@10                | 0.00063338  | 1547.75562 | 774.8851 | 1547.75513 | 774.884827 | 2 | 20 | 12.3055 | 7.97 |
| 8 | 55.19 | 57.27 | 53.1 CALU_FlexII | 99.0 HLYVESDNQKDGK                      | Label: 13C(6)15N(2)(K)@10; Label: 13C(6)15N(2)(K)@13                                              | missed K-D@10                | -0.00105798 | 1547.75403 | 516.9253 | 1547.75513 | 516.925659 | 3 | 18 | 12.532  | 7.97 |
| 8 | 55.19 | 57.27 | 53.1 CALU_FlexII | 99.0 HLYVESDNQKDGK                      | Label: 13C(6)15N(2)(K)@10; Label: 13C(6)15N(2)(K)@13                                              | missed K-D@10                | -0.00901021 | 1547.74609 | 774.8803 | 1547.75513 | 774.884827 | 2 | 15 | 12.5713 | 7.97 |
| 8 | 55.19 | 57.27 | 53.1 CALU_FlexII | 99.0 HLYVESDNQKDGK                      | Label: 13C(6)15N(2)(K)@10; Label: 13C(6)15N(2)(K)@13                                              | missed K-D@10                | -0.00105798 | 1547.75403 | 516.9253 | 1547.75513 | 516.925659 | 3 | 18 | 12.7928 | 7.97 |
| 8 | 55.19 | 57.27 | 53.1 CALU_FlexII | 99.0 HLYVESDNQKDGK                      | Deamidated(Q)@8; Label: 13C(6)15N(2)(K)@10; Label: 13C(6)15N(2)(K)@13                             | missed K-D@10                | 0.00113557  | 1548.74023 | 517.254  | 1548.73914 | 517.253662 | 3 | 18 | 13.0573 | 7.97 |
| 8 | 55.19 | 57.27 | 53.1 CALU_FlexII | 99.0 HLYVESDNQKDGK                      | Deamidated(N)@9; Label: 13C(6)15N(2)(K)@10; Label: 13C(6)15N(2)(K)@13                             | missed K-D@10                | 0.00160622  | 1548.74072 | 775.3776 | 1548.73914 | 775.376831 | 2 | 19 | 13.121  | 7.97 |
| 8 | 55.19 | 57.27 | 53.1 CALU_FlexII | 99.0 HLYVESDNQKDKLTK                    | Label: 13C(6)15N(2)(K)@10; Label: 13C(6)15N(2)(K)@13; Label: 13C(6)15N(2)(K)@16                   | missed K-D@10; missed K-L@13 | 0.0124434   | 1898.00855 | 475.5094 | 1897.99597 | 475.506287 | 4 | 14 | 13.8453 | 7.97 |
| 8 | 55.19 | 57.27 | 53.1 CALU_FlexII | 99.0 IDGDKDGFVTVDLKDWKI                 | Label: 13C(6)15N(2)(K)@5; Label: 13C(6)15N(2)(K)@15; Label: 13C(6)15N(2)(K)@19                    | missed K-D@5; missed K-D@15  | 0.00534838  | 2216.14746 | 1109.081 | 2216.14282 | 1109.07861 | 2 | 26 | 19.2655 | 7.97 |
| 8 | 55.19 | 57.27 | 53.1 CALU_FlexII | 99.0 IDGDKDGFVTVDLKDWKI                 | Label: 13C(6)15N(2)(K)@5; Label: 13C(6)15N(2)(K)@15; Label: 13C(6)15N(2)(K)@19                    | missed K-E@3; missed K-D@15  | -0.00403344 | 2216.13892 | 739.7202 | 2216.14282 | 739.721497 | 3 | 24 | 19.4938 | 7.97 |
| 8 | 55.19 | 57.27 | 53.1 CALU_FlexII | 99.0 IDGDKDGFVTVDLKDWKI                 | Label: 13C(6)15N(2)(K)@5; Label: 13C(6)15N(2)(K)@15; Label: 13C(6)15N(2)(K)@19                    | missed K-D@5; missed K-D@15  | -0.00403344 | 2216.13892 | 739.7202 | 2216.14282 | 739.721497 | 3 | 13 | 19.7901 | 7.97 |
| 8 | 55.19 | 57.27 | 53.1 CALU_FlexII | 99.0 IDGDKDGFVTVDLKDWKI                 | Label: 13C(6)15N(2)(K)@5; Label: 13C(6)15N(2)(K)@15; Label: 13C(6)15N(2)(K)@19                    | missed K-D@5; missed K-D@15  | -0.0134153  | 2216.1294  | 555.0396 | 2216.14282 | 555.042969 | 4 | 12 | 13.1111 | 7.97 |
| 8 | 55.19 | 57.27 | 53.1 CALU_FlexII | 99.0 IDGDKDGFVTVDLKDWKI                 | Label: 13C(6)15N(2)(K)@5; Label: 13C(6)15N(2)(K)@15; Label: 13C(6)15N(2)(K)@19                    | missed K-D@5; missed K-D@15  | -0.0146712  | 2216.12744 | 1109.071 | 2216.14282 | 1109.07861 | 2 | 11 | 19.5477 | 7.97 |
| 8 | 55.19 | 57.27 | 53.1 CALU_FlexII | 99.0 LTKEEIVDKYDLFVGSQATDFGEALVR        | Label: 13C(6)15N(2)(K)@3; Label: 13C(6)15N(2)(K)@9; Deamidated(Q)@17; Label: 13C(6)15N(4)(R)@27   | missed K-E@3; missed K-Y@9   | -0.00352117 | 3069.57227 | 768.4003 | 3069.57568 | 768.401184 | 4 | 20 | 19.4202 | 7.97 |
| 8 | 55.19 | 57.27 | 53.1 CALU_FlexII | 99.0 LTKEEIVDKYDLFVGSQATDFGEALVR        | Label: 13C(6)15N(2)(K)@3; Label: 13C(6)15N(2)(K)@9; Deamidated(Q)@17; Label: 13C(6)15N(4)(R)@27   | missed K-E@3; missed K-Y@9   | 0.00356459  | 3069.61133 | 1024.211 | 3069.57568 | 1024.19922 | 3 | 21 | 19.4938 | 7.97 |
| 8 | 55.19 | 57.27 | 53.1 CALU_FlexII | 99.0 LTKEEIVDKYDLFVGSQATDFGEALVR        | Label: 13C(6)15N(2)(K)@3; Label: 13C(6)15N(2)(K)@9; Deamidated(Q)@17; Label: 13C(6)15N(4)(R)@27   | missed K-E@3; missed K-Y@9   | -0.00352117 | 3069.57227 | 768.4003 | 3069.57568 | 768.401184 | 4 | 19 | 19.6844 | 7.97 |
| 8 | 55.19 | 57.27 | 53.1 CALU_FlexII | 99.0 LTKEEIVDKYDLFVGSQATDFGEALVR        | Label: 13C(6)15N(2)(K)@3; Label: 13C(6)15N(2)(K)@9; Deamidated(Q)@17; Label: 13C(6)15N(4)(R)@27   | missed K-E@3; missed K-Y@9   | -0.00352117 | 3069.57227 | 768.4003 | 3069.57568 | 768.401184 | 4 | 19 | 19.9482 | 7.97 |
| 8 | 55.19 | 57.27 | 53.1 CALU_FlexII | 99.0 LTKEEIVDKYDLFVGSQATDFGEALVR        | Label: 13C(6)15N(2)(K)@3; Label: 13C(6)15N(2)(K)@9; Deamidated(Q)@17; Label: 13C(6)15N(4)(R)@27   | missed K-E@3; missed K-Y@9   | 0.0056165   | 3069.5813  | 1024.201 | 3069.57568 | 1024.19922 | 3 | 19 | 19.979  | 7.97 |
| 8 | 55.19 | 57.27 | 53.1 CALU_FlexII | 99.0 LTKEEIVDKYDLFVGSQATDFGEALVR        | Label: 13C(6)15N(2)(K)@3; Label: 13C(6)15N(2)(K)@9; Deamidated(Q)@17; Label: 13C(6)15N(4)(R)@27   | missed K-E@3; missed K-Y@9   | 0.0362739   | 3069.61206 | 768.4103 | 3069.57568 | 768.401184 | 4 | 15 | 26.6485 | 7.97 |
| 8 | 55.19 | 57.27 | 53.1 CALU_FlexII | 99.0 LTKEEIVDKYDLFVGSQATDFGEALVR        | Label: 13C(6)15N(2)(K)@3; Label: 13C(6)15N(2)(K)@9; Deamidated(Q)@17; Label: 13C(6)15N(4)(R)@27   | missed K-E@3; missed K-Y@9   | 0.00155399  | 3069.57739 | 768.4016 | 3069.57568 | 768.401184 | 4 | 19 | 19.4932 | 7.97 |
| 8 | 55.19 | 57.27 | 53.1 CALU_FlexII | 99.0 LTKEEIVDKYDLFVGSQATDFGEALVR        | Label: 13C(6)15N(2)(K)@3; Label: 13C(6)15N(2)(K)@9; Label: 13C(6)15N(4)(R)@27                     | missed K-E@3; missed K-Y@9   | -0.0252344  | 3068.56714 | 1023.863 | 3068.59155 | 1023.87116 | 3 | 21 | 19.5503 | 7.97 |
| 8 | 55.19 | 57.27 | 53.1 CALU_FlexII | 99.0 LTKEEIVDKYDLFVGSQATDFGEALVR        | Label: 13C(6)15N(2)(K)@3; Label: 13C(6)15N(2)(K)@9; Label: 13C(6)15N(4)(R)@27                     | missed K-E@3; missed K-Y@9   | -0.0195087  | 3068.57227 | 768.1503 | 3068.59155 | 768.155212 | 4 | 13 | 20.3944 | 7.97 |
| 8 | 55.19 | 57.27 | 53.1 CALU_FlexII | 99.0 LTKEEIVDKYDLFVGSQATDFGEALVR        | Label: 13C(6)15N(2)(K)@3; Label: 13C(6)15N(2)(K)@9; Label: 13C(6)15N(4)(R)@27                     | missed K-E@3; missed K-Y@9   | 0.0202863   | 3068.61206 | 768.1603 | 3068.59155 | 768.155212 | 4 | 6  | 26.9563 | 7.97 |
| 8 | 55.19 | 57.27 | 53.1 CALU_FlexII | 99.0 MADKDGDIUATK                       | Label: 13C(6)15N(2)(K)@4; Label: 13C(6)15N(2)(K)@12                                               | missed K-D@4                 | -0.0157703  | 1292.64612 | 431.8893 | 1292.66174 | 431.894501 | 3 | 12 | 14.9877 | 7.97 |
| 8 | 55.19 | 57.27 | 53.1 CALU_FlexII | 99.0 MADKDGDIUATK                       | Label: 13C(6)15N(2)(K)@4; Label: 13C(6)15N(2)(K)@12                                               | missed K-D@4                 | -0.00322749 | 1292.65833 | 431.8934 | 1292.66174 | 431.894501 | 3 | 11 | 15.2569 | 7.97 |
| 8 | 55.19 | 57.27 | 53.1 CALU_FlexII | 99.0 MADKDGDIUATK                       | Oxidation(M)@1; Label: 13C(6)15N(2)(K)@4; Label: 13C(6)15N(2)(K)@12                               | missed K-D@4                 | -0.00392109 | 1308.65295 | 437.2249 | 1308.65662 | 437.226135 | 3 | 10 | 14.5732 | 7.97 |
| 8 | 55.19 | 57.27 | 53.1 CALU_FlexII | 99.0 MDKEETKDWLPSDYPDHAEAEAR            | Oxidation(M)@1; Label: 13C(6)15N(2)(K)                                                            |                              |             |            |          |            |            |   |    |         |      |

|   |       |       |                   |                                        |                                                                                     |                                |             |            |          |            |            |   |    |         |       |
|---|-------|-------|-------------------|----------------------------------------|-------------------------------------------------------------------------------------|--------------------------------|-------------|------------|----------|------------|------------|---|----|---------|-------|
| 8 | 55.19 | 57.27 | 53.1 CALU_FlexII  | 99.0 TFDQLTPEESKER                     | Label: 13C(6)15N(2)(K) @ 11; Label: 13C(6)15N(4)(R) @ 13                            | missed K-E @ 11                | -0.0053525  | 1596.7699  | 533.2639 | 1596.77502 | 533.265625 | 3 | 10 | 16.167  | 7.97  |
| 8 | 55.19 | 57.27 | 53.1 CALU_FlexII  | 99.0 VHHEPQLSDK                        | Label: 13C(6)15N(2)(K) @ 10                                                         |                                | -0.0026225  | 1196.60046 | 399.8741 | 1196.60291 | 399.874908 | 3 | 13 | 9.655   | 7.97  |
| 8 | 55.19 | 57.27 | 53.1 CALU_FlexII  | 99.0 VHHEPQLSDK                        | Label: 13C(6)15N(2)(K) @ 10                                                         |                                | 0.00202907  | 1196.6051  | 599.3098 | 1196.60291 | 599.308716 | 2 | 11 | 9.8547  | 7.97  |
| 8 | 55.19 | 57.27 | 53.1 CALU_FlexII  | 99.0 VHHEPQLSDK                        | Label: 13C(6)15N(2)(K) @ 10                                                         |                                | -0.00207318 | 1196.60083 | 399.8742 | 1196.60291 | 399.874908 | 3 | 13 | 10.1684 | 7.97  |
| 8 | 55.19 | 57.27 | 53.1 CALU_FlexII  | 99.0 VHHEPQLSDK                        | Label: 13C(6)15N(2)(K) @ 10                                                         |                                | 0.0126669   | 1196.61585 | 399.8792 | 1196.60291 | 399.874908 | 3 | 13 | 10.4332 | 7.97  |
| 8 | 55.19 | 57.27 | 53.1 CALU_FlexII  | 99.0 VHHEPQLSDK                        | Label: 13C(6)15N(2)(K) @ 10                                                         |                                | -0.00024212 | 1196.60254 | 399.8748 | 1196.60291 | 399.874908 | 3 | 10 | 9.3849  | 7.97  |
| 8 | 55.19 | 57.27 | 53.1 CALU_FlexII  | 99.0 VHHEPQLSDK                        | Label: 13C(6)15N(2)(K) @ 10                                                         |                                | 7.59E-05    | 1196.60303 | 599.3088 | 1196.60291 | 599.308716 | 2 | 10 | 9.5939  | 7.97  |
| 8 | 55.19 | 57.27 | 53.1 CALU_FlexII  | 99.0 VHHEPQLSDK                        | Label: 13C(6)15N(2)(K) @ 10                                                         |                                | -0.0173625  | 1196.58545 | 399.8691 | 1196.60291 | 399.874908 | 3 | 11 | 10.9476 | 7.97  |
| 8 | 55.19 | 57.27 | 53.1 CALU_FlexII  | 99.0 VHHEPQLSDK                        | Label: 13C(6)15N(2)(K) @ 10                                                         |                                | 0.00202907  | 1196.6051  | 599.3098 | 1196.60291 | 599.308716 | 2 | 9  | 10.1073 | 7.97  |
| 8 | 55.19 | 57.27 | 53.1 CALU_FlexII  | 99.0 VHHEPQLSDK                        | Label: 13C(6)15N(2)(K) @ 10                                                         |                                | -0.00207318 | 1196.60083 | 399.8742 | 1196.60291 | 399.874908 | 3 | 11 | 10.6906 | 7.97  |
| 8 | 55.19 | 57.27 | 53.1 CALU_FlexII  | 99.0 VHHEPQLSDK                        | Label: 13C(6)15N(2)(K) @ 10                                                         |                                | 0.00202907  | 1196.6051  | 599.3098 | 1196.60291 | 599.308716 | 2 | 7  | 10.3626 | 7.97  |
| 8 | 55.19 | 57.27 | 53.1 CALU_FlexII  | 99.0 VHHEPQLSDK                        | Label: 13C(6)15N(2)(K) @ 10                                                         |                                | -0.0173625  | 1196.58545 | 399.8691 | 1196.60291 | 399.874908 | 3 | 8  | 11.2262 | 7.97  |
| 8 | 55.19 | 57.27 | 53.1 CALU_FlexII  | 99.0 VHHEPQLSDK                        | Label: 13C(6)15N(2)(K) @ 10                                                         |                                | -0.00041234 | 1196.60242 | 599.3085 | 1196.60291 | 599.308716 | 2 | 6  | 10.6333 | 7.97  |
| 8 | 55.19 | 57.27 | 53.1 CALU_FlexII  | 99.0 VHHEPQLSDKVHNDQAQSFYDHDFAFLGAEAAK | Label: 13C(6)15N(2)(K) @ 10; Deamidated(Q) @ 16; Label: 13C(6)15N(2)(K) @ 32        | missed K-V @ 10                | 0.0203794   | 3665.68408 | 1222.902 | 3665.66309 | 1222.8949  | 3 | 20 | 16.6179 | 7.97  |
| 8 | 55.19 | 57.27 | 53.1 CALU_FlexII  | 99.0 VHHEPQLSDKVHNDQAQSFYDHDFAFLGAEAAK | Label: 13C(6)15N(2)(K) @ 10; Deamidated(N) @ 13; Label: 13C(6)15N(2)(K) @ 32        | missed K-V @ 10                | 0.0308951   | 3665.69385 | 917.4307 | 3665.66309 | 917.423035 | 4 | 14 | 16.5421 | 7.97  |
| 8 | 55.19 | 57.27 | 53.1 CALU_FlexII  | 99.0 VHNDQAQSFYDHDFAFLGAEAAK           | Label: 13C(6)15N(2)(K) @ 22                                                         |                                | -0.00308803 | 2486.08325 | 622.5281 | 2486.08667 | 622.528931 | 4 | 18 | 17.0303 | 7.97  |
| 8 | 55.19 | 57.27 | 53.1 CALU_FlexII  | 99.0 VHNDQAQSFYDHDFAFLGAEAAK           | Label: 13C(6)15N(2)(K) @ 22                                                         |                                | 0.00019025  | 2486.08691 | 829.7029 | 2486.08667 | 829.70282  | 3 | 19 | 17.0318 | 7.97  |
| 8 | 55.19 | 57.27 | 53.1 CALU_FlexII  | 99.0 VHNDQAQSFYDHDFAFLGAEAAK           | Deamidated(Q) @ 6; Label: 13C(6)15N(2)(K) @ 22                                      |                                | 0.0184795   | 2487.08936 | 1244.552 | 2487.07056 | 1244.5426  | 2 | 18 | 17.0613 | 7.97  |
| 8 | 55.19 | 57.27 | 53.1 CALU_FlexII  | 99.0 VHNDQAQSFYDHDFAFLGAEAAK           | Deamidated(Q) @ 6; Label: 13C(6)15N(2)(K) @ 22                                      |                                | -0.0009121  | 2487.06982 | 830.0305 | 2487.07056 | 830.030823 | 3 | 18 | 17.3196 | 7.97  |
| 8 | 55.19 | 57.27 | 53.1 CALU_FlexII  | 99.0 WIYEDYER                          | Label: 13C(6)15N(4)(R) @ 8                                                          |                                | -0.00145292 | 1118.52564 | 560.2701 | 1118.52722 | 560.270874 | 2 | 9  | 17.5612 | 7.97  |
| 8 | 55.19 | 57.27 | 53.1 CALU_FlexII  | 99.0 YPTFLYK                           | Label: 13C(6)15N(2)(K) @ 7                                                          | cleaved F-Y @ N-term           | -0.00165037 | 938.497681 | 470.2561 | 938.499329 | 470.256928 | 2 | 9  | 18.0092 | 7.97  |
| 8 | 55.19 | 57.27 | 53.1 CALU_FlexII  | 99.0 YPTFLYK                           | Label: 13C(6)15N(2)(K) @ 7                                                          | cleaved F-Y @ N-term           | 0.00020099  | 938.499451 | 470.257  | 938.499329 | 470.256928 | 2 | 9  | 17.9008 | 7.97  |
| 8 | 55.19 | 57.27 | 53.1 CALU_FlexII  | 99.0 YPTFLYK                           | Label: 13C(6)15N(2)(K) @ 7                                                          | cleaved F-Y @ N-term           | -0.00091407 | 938.498474 | 470.2565 | 938.499329 | 470.256928 | 2 | 9  | 17.7612 | 7.97  |
| 9 | 54.6  | 56.93 | 78.8 MAT1A_FlexII | 99.0 DLDLKKPIYQK                       | Label: 13C(6)15N(2)(K) @ 5; Label: 13C(6)15N(2)(K) @ 6; Label: 13C(6)15N(2)(K) @ 11 | missed K-K @ 5                 | 0.00741642  | 1383.82629 | 692.9204 | 1383.87885 | 692.916687 | 2 | 18 | 15.6823 | 26.98 |
| 9 | 54.6  | 56.93 | 78.8 MAT1A_FlexII | 99.0 FVIGGPQGDAGVTGR                   | Label: 13C(6)15N(4)(R) @ 15                                                         |                                | -0.00212836 | 1439.73743 | 720.876  | 1439.73962 | 720.877075 | 2 | 17 | 16.8747 | 26.98 |
| 9 | 54.6  | 56.93 | 78.8 MAT1A_FlexII | 99.0 FVIGGPQGDAGVTGRK                  | Label: 13C(6)15N(4)(R) @ 15; Label: 13C(6)15N(2)(K) @ 16                            | missed R-K @ 15                | -0.00282945 | 1575.84583 | 788.9302 | 1575.84876 | 788.931702 | 2 | 16 | 16.219  | 26.98 |
| 9 | 54.6  | 56.93 | 78.8 MAT1A_FlexII | 99.0 HIGYDDSAK                         | Label: 13C(6)15N(2)(K) @ 9                                                          |                                | -0.00379771 | 1012.46668 | 507.2406 | 1012.47052 | 507.242523 | 2 | 14 | 12.0296 | 26.98 |
| 9 | 54.6  | 56.93 | 78.8 MAT1A_FlexII | 99.0 ICDQISDAVLDAHLK                   | Propionamide(C) @ 2; Label: 13C(6)15N(2)(K) @ 15                                    |                                | -0.00030722 | 1718.87512 | 860.4448 | 1718.87524 | 860.444885 | 2 | 17 | 17.7979 | 26.98 |
| 9 | 54.6  | 56.93 | 78.8 MAT1A_FlexII | 99.0 IIVDTYGGWGAHGGGAFSGK              | Label: 13C(6)15N(2)(K) @ 20                                                         |                                | 0.0010547   | 1956.95837 | 653.3267 | 1956.95754 | 653.326416 | 3 | 15 | 26.5289 | 26.98 |
| 9 | 54.6  | 56.93 | 78.8 MAT1A_FlexII | 99.0 KIVDTYGGWGAHGGGAFSGK              | Label: 13C(6)15N(2)(K) @ 1; Label: 13C(6)15N(2)(K) @ 21                             | missed K-I @ 1                 | -0.0171635  | 2093.04956 | 698.6904 | 2093.06641 | 698.696106 | 3 | 18 | 17.0445 | 26.98 |
| 9 | 54.6  | 56.93 | 78.8 MAT1A_FlexII | 99.0 KLVFYPTFLYK                       | Label: 13C(6)15N(2)(K) @ 1; Label: 13C(6)15N(2)(K) @ 11                             | missed K-L @ 1                 | -0.00320955 | 1433.82605 | 717.9203 | 1433.82935 | 717.921936 | 2 | 17 | 19.6394 | 26.98 |
| 9 | 54.6  | 56.93 | 78.8 MAT1A_FlexII | 99.0 RALKEOVR                          | Label: 13C(6)15N(4)(R) @ 1; Label: 13C(6)15N(2)(K) @ 4; Label: 13C(6)15N(4)(R) @ 9  | missed R-A @ 1; missed K-E @ 4 | -0.00267859 | 1139.71057 | 380.9108 | 1139.71326 | 380.911713 | 3 | 13 | 13.6323 | 26.98 |
| 9 | 54.6  | 56.93 | 78.8 MAT1A_FlexII | 99.0 SEFPWEVPR                         | Label: 13C(6)15N(4)(R) @ 9                                                          |                                | -0.00061858 | 1155.55823 | 578.7864 | 1155.55884 | 578.786682 | 2 | 10 | 18.8906 | 26.98 |
| 9 | 54.6  | 56.93 | 78.8 MAT1A_FlexII | 99.0 SGLLPWLRPDSK                      | Label: 13C(6)15N(4)(R) @ 8; Label: 13C(6)15N(2)(K) @ 12                             |                                | -0.0123269  | 1385.76624 | 693.8904 | 1383.87885 | 692.916606 | 2 | 15 | 18.7992 | 26.98 |
| 9 | 54.6  | 56.93 | 78.8 MAT1A_FlexII | 99.0 TCNVLVALEQSPDIAQCVHLDR            | Propionamide(C) @ 2; Propionamide(C) @ 18; Label: 13C(6)15N(4)(R) @ 23              |                                | 0.00373309  | 2703.33862 | 902.1201 | 2703.33472 | 902.118897 | 3 | 22 | 19.3142 | 26.98 |
| 9 | 54.6  | 56.93 | 78.8 MAT1A_FlexII | 99.0 TERELEDVVHK                       | Label: 13C(6)15N(4)(R) @ 3; Label: 13C(6)15N(2)(K) @ 11                             | missed R-E @ 3                 | -0.00077965 | 1355.75195 | 452.9246 | 1355.75281 | 452.924866 | 3 | 13 | 16.0674 | 26.98 |
| 9 | 54.6  | 56.93 | 78.8 MAT1A_FlexII | 99.0 TGMVLLCGEITSMAMVDYQR              | Propionamide(C) @ 7; Label: 13C(6)15N(4)(R) @ 20                                    |                                | -0.0104784  | 2298.06543 | 1150.04  | 2298.07568 | 1150.04504 | 2 | 12 | 26.8223 | 26.98 |
| 9 | 54.6  | 56.93 | 78.8 MAT1A_FlexII | 99.0 TQVTVQYMQDGNVAPVR                 | Deamidated(N) @ 11; Label: 13C(6)15N(4)(R) @ 18                                     |                                | -0.00103439 | 2029.01746 | 1015.516 | 2029.01782 | 1015.51617 | 2 | 21 | 17.9311 | 26.98 |
| 9 | 54.6  | 56.93 | 78.8 MAT1A_FlexII | 99.0 VACETVCK                          | Propionamide(C) @ 3; Propionamide(C) @ 7; Label: 13C(6)15N(2)(K) @ 8                |                                | 0.00100681  | 1001.47766 | 501.7461 | 1001.47856 | 501.745544 | 2 | 10 | 13.2518 | 26.98 |
| 9 | 54.6  | 56.93 | 78.8 MAT1A_FlexII | 99.0 VLVQVSYAIGVAEPLSISITYGTSOK        | Label: 13C(6)15N(2)(K) @ 27                                                         |                                | -0.0136001  | 2877.54858 | 960.1901 | 2877.56201 | 960.19458  | 3 | 18 | 20.9643 | 26.98 |
| 9 | 54.6  | 56.93 | 78.8 MAT1A_FlexII | 99.0 VLVQVSYAIGVAEPLSISITYGTSOKTER     | Label: 13C(6)15N(2)(K) @ 27; Label: 13C(6)15N(4)(R) @ 30                            | missed K-T @ 27                | 0.0103092   | 3273.77222 | 819.4503 | 3273.76148 | 819.447693 | 4 | 18 | 20.3538 | 26.98 |
| 9 | 54.6  | 56.93 | 78.8 MAT1A_FlexII | 99.0 VVRDTIKHIGYDDSAK                  | Label: 13C(6)15N(4)(R) @ 3; Label: 13C(6)15N(2)(K) @ 7; Label: 13C(6)15N(2)(K) @ 16 | missed R-D @ 3; missed K-H @ 7 | -0.0108443  | 1841.97376 | 461.5007 | 1841.98462 | 461.503418 | 4 | 13 | 14.6043 | 26.98 |
| 9 | 54.6  | 56.93 | 78.8 MAT1A_FlexII | 99.0 YLEDTVVYHLQPSGR                   | Label: 13C(6)15N(4)(R) @ 15                                                         |                                | -0.00537009 | 1801.8457  | 901.9301 | 1801.85107 | 901.9328   | 2 | 23 | 16.7412 | 26.98 |
| 9 | 54.6  | 56.93 | 78.8 MAT1A_FlexII | 99.0 IHTIVISVQHNEIDTLEEMR              | Deamidated(N) @ 11; Label: 13C(6)15N(4)(R) @ 20                                     |                                | 0.00755919  | 2387.21045 | 597.8099 | 2387.20313 | 597.808044 | 4 | 8  | 26.6324 | 26.98 |
| 9 | 54.6  | 56.93 | 78.8 MAT1A_FlexII | 99.0 IHTIVISVQHNEIDTLEEMRR             | Deamidated(Q) @ 9; Label: 13C(6)15N(4)(R) @ 20; Label: 13C(6)15N(4)(R) @ 21         | missed R-R @ 20                | 0.0263127   | 2553.33862 | 852.1202 | 2553.3125  | 852.111389 | 3 | 13 | 17.344  | 26.98 |
| 9 | 54.6  | 56.93 | 78.8 MAT1A_FlexII | 99.0 DLDLKKPIYQK                       | Label: 13C(6)15N(2)(K) @ 5; Label: 13C(6)15N(2)(K) @ 6; Label: 13C(6)15N(2)(K) @ 11 | missed K-K @ 5                 | -0.0126031  | 1383.80627 | 692.9104 | 1383.81885 | 692.916687 | 2 | 13 | 15.9488 | 26.98 |
| 9 | 54.6  | 56.93 | 78.8 MAT1A_FlexII | 99.0 FVIGGPQGDAGVTGR                   | Label: 13C(6)15N(4)(R) @ 15                                                         |                                | -0.00164008 | 1439.73804 | 720.8763 | 1439.73962 | 720.877075 | 2 | 17 | 17.1492 | 26.98 |
| 9 | 54.6  | 56.93 | 78.8 MAT1A_FlexII | 99.0 FVIGGPQGDAGVTGR                   | Label: 13C(6)15N(4)(R) @ 15                                                         |                                | 0.00653862  | 1439.74622 | 720.8804 | 1439.73962 | 720.877075 | 2 | 15 | 21.8121 | 26.98 |
| 9 | 54.6  | 56.93 | 78.8 MAT1A_FlexII | 99.0 FVIGGPQGDAGVTGR                   | Label: 13C(6)15N(4)(R) @ 15                                                         |                                | 0.00061736  | 1439.74023 | 480.9207 | 1439.73962 | 480.920502 | 3 | 15 | 16.9659 | 26.98 |
| 9 | 54.6  | 56.93 | 78.8 MAT1A_FlexII | 99.0 FVIGGPQGDAGVTGR                   | Label: 13C(6)15N(4)(R) @ 15                                                         |                                | -0.00041937 | 1439.73926 | 720.8769 | 1439.73962 | 720.877075 | 2 | 15 | 17.4112 | 26.98 |
| 9 | 54.6  | 56.93 | 78.8 MAT1A_FlexII | 99.0 FVIGGPQGDAGVTGR                   | Label: 13C(6)15N(4)(R) @ 15                                                         |                                | -0.00178069 | 1429.72961 | 715.8721 | 1429.73132 | 715.872986 | 2 | 14 | 16.9576 | 26.98 |
| 9 | 54.6  | 56.93 | 78.8 MAT1A_FlexII | 99.0 FVIGGPQGDAGVTGR                   | Label: 13C(6)15N(4)(R) @ 15                                                         |                                | 0.00653862  | 1439.74622 | 720.8804 | 1439.73962 | 720.877075 | 2 | 13 | 20.9105 | 26.98 |
| 9 | 54.6  | 56.93 | 78.8 MAT1A_FlexII | 99.0 FVIGGPQGDAGVTGR                   | Label: 13C(6)15N(4)(R) @ 15                                                         |                                | 0.00653862  | 1439.74622 | 720.8804 | 1439.73962 | 720.877075 | 2 | 12 | 22.247  | 26.98 |
| 9 | 54.6  | 56.93 | 78.8 MAT1A_FlexII | 99.0 FVIGGPQGDAGVTGR                   | Label: 13C(6)15N(4)(R) @ 15                                                         |                                | 0.00653862  | 1439.74622 | 720.8804 | 1439.73962 | 720.877075 | 2 | 11 | 26.5443 | 26.98 |
| 9 | 54.6  | 56.93 | 78.8 MAT1A_FlexII | 99.0 FVIGGPQGDAGVTGRK                  | Label: 13C(6)15N(4)(R) @ 15; Label: 13C(6)15N(2)(K) @ 16                            | missed R-K @ 15                | 0.00116748  | 1575.84998 | 526.2906 | 1575.84876 | 526.290222 | 3 | 13 | 16.167  | 26.98 |
| 9 | 54.6  | 56.93 | 78.8 MAT1A_FlexII | 99.0 FVIGGPQGDAGVTGRK                  | Label: 13C(6)15N(4)(R) @ 15; Label: 13C(6)15N(2)(K) @ 16                            | missed R-K @ 15                | 0.00025195  | 1575.849   | 526.2903 | 1575.84876 | 526.290222 | 3 | 12 | 16.4443 | 26.98 |
| 9 | 54.6  | 56.93 | 78.8 MAT1A_FlexII | 99.0 HIGYDDSAK                         | Label: 13C(6)15N(2)(K) @ 9                                                          |                                | 0.00120717  | 1012.47168 | 507.2431 | 1012.47052 | 507.242523 | 2 | 15 | 12.2854 | 26.98 |
| 9 | 54.6  | 56.93 | 78.8 MAT1A_FlexII | 99.0 HIGYDDSAK                         | Label: 13C(6)15N(2)(K) @ 9                                                          |                                | -0.00379771 | 1012.46668 | 507.2406 | 1012.47052 | 507.242523 | 2 | 15 | 12.5429 | 26.98 |
| 9 | 54.6  | 56.9  |                   |                                        |                                                                                     |                                |             |            |          |            |            |   |    |         |       |

|    |       |       |                    |                                        |                                                                                                                   |                                 |             |            |          |            |            |   |    |         |       |
|----|-------|-------|--------------------|----------------------------------------|-------------------------------------------------------------------------------------------------------------------|---------------------------------|-------------|------------|----------|------------|------------|---|----|---------|-------|
| 9  | 54.6  | 56.93 | 78.8 MAT1A_FlexIII | 99.0 KIIVDTYGGVGAHGGGAFSGK             | Label: 13C(6)15N(2)(K) @ 1; Label: 13C(6)15N(2)(K) @ 21                                                           | missed K-I @ 1                  | 0.0128658   | 2093.07935 | 698.7004 | 2093.06641 | 698.696106 | 3 | 8  | 26.8684 | 26.98 |
| 9  | 54.6  | 56.93 | 78.8 MAT1A_FlexIII | 99.0 KLVFYPTFLYK                       | Label: 13C(6)15N(2)(K) @ 1; Label: 13C(6)15N(2)(K) @ 11                                                           | missed K-L @ 1                  | -0.00040194 | 1433.8291  | 717.9218 | 1433.82935 | 717.921936 | 2 | 18 | 19.0948 | 26.98 |
| 9  | 54.6  | 56.93 | 78.8 MAT1A_FlexIII | 99.0 KLVFYPTFLYK                       | Label: 13C(6)15N(2)(K) @ 1; Label: 13C(6)15N(2)(K) @ 11                                                           | missed K-L @ 1                  | -0.00052401 | 1433.82886 | 717.9217 | 1433.82935 | 717.921936 | 2 | 17 | 19.361  | 26.98 |
| 9  | 54.6  | 56.93 | 78.8 MAT1A_FlexIII | 99.0 SGLLPWLRPDSK                      | Label: 13C(6)15N(4)(R) @ 8; Label: 13C(6)15N(2)(K) @ 12                                                           |                                 | 0.00769257  | 1385.7865  | 693.9005 | 1385.77856 | 693.896606 | 2 | 13 | 19.0652 | 26.98 |
| 9  | 54.6  | 56.93 | 78.8 MAT1A_FlexIII | 99.0 TGMVLLCGEITSMAMVDYQR              | Propionamide(C) @ 7; Label: 13C(6)15N(4)(R) @ 20                                                                  |                                 | 0.00365031  | 2298.07935 | 767.0337 | 2298.07568 | 767.032471 | 3 | 23 | 20.1459 | 26.98 |
| 9  | 54.6  | 56.93 | 78.8 MAT1A_FlexIII | 99.0 TGMVLLCGEITSMAMVDYQR              | Propionamide(C) @ 7; Label: 13C(6)15N(4)(R) @ 20                                                                  |                                 | -0.00642048 | 2298.06909 | 767.0303 | 2298.07568 | 767.032471 | 3 | 19 | 20.7319 | 26.98 |
| 9  | 54.6  | 56.93 | 78.8 MAT1A_FlexIII | 99.0 TGMVLLCGEITSMAMVDYQR              | Propionamide(C) @ 7; Label: 13C(6)15N(4)(R) @ 20                                                                  |                                 | -0.00056112 | 2298.07495 | 767.0323 | 2298.07568 | 767.032471 | 3 | 18 | 21.0098 | 26.98 |
| 9  | 54.6  | 56.93 | 78.8 MAT1A_FlexIII | 99.0 TGMVLLCGEITSMAMVDYQR              | Propionamide(C) @ 7; Label: 13C(6)15N(4)(R) @ 20                                                                  |                                 | 0.00954106  | 2298.08545 | 1150.05  | 2298.07568 | 1150.04504 | 2 | 19 | 21.2775 | 26.98 |
| 9  | 54.6  | 56.93 | 78.8 MAT1A_FlexIII | 99.0 TGMVLLCGEITSMAMVDYQR              | Propionamide(C) @ 7; Label: 13C(6)15N(4)(R) @ 20                                                                  |                                 | -0.0104784  | 2298.06543 | 1150.04  | 2298.07568 | 1150.04504 | 2 | 23 | 26.4589 | 26.98 |
| 9  | 54.6  | 56.93 | 78.8 MAT1A_FlexIII | 99.0 TGMVLLCGEITSMAMVDYQR              | Propionamide(C) @ 7; Label: 13C(6)15N(4)(R) @ 20                                                                  |                                 | 0.0113582   | 2298.0874  | 1150.051 | 2298.07568 | 1150.04504 | 2 | 22 | 20.3091 | 26.98 |
| 9  | 54.6  | 56.93 | 78.8 MAT1A_FlexIII | 99.0 TGMVLLCGEITSMAMVDYQR              | Propionamide(C) @ 7; Label: 13C(6)15N(4)(R) @ 20                                                                  |                                 | -0.00642048 | 2298.06909 | 767.0303 | 2298.07568 | 767.032471 | 3 | 15 | 21.7811 | 26.98 |
| 9  | 54.6  | 56.93 | 78.8 MAT1A_FlexIII | 99.0 TGMVLLCGEITSMAMVDYQR              | Propionamide(C) @ 7; Label: 13C(6)15N(4)(R) @ 20                                                                  |                                 | -0.00642048 | 2298.06909 | 767.0303 | 2298.07568 | 767.032471 | 3 | 15 | 21.4528 | 26.98 |
| 9  | 54.6  | 56.93 | 78.8 MAT1A_FlexIII | 99.0 TGMVLLCGEITSMAMVDYQR              | Propionamide(C) @ 7; Deamidated(Q) @ 19; Label: 13C(6)15N(4)(R) @ 20                                              |                                 | 0.000550464 | 2299.06543 | 1150.54  | 2299.05957 | 1150.53711 | 2 | 12 | 26.4044 | 26.98 |
| 9  | 54.6  | 56.93 | 78.8 MAT1A_FlexIII | 99.0 TQTVQYMQDNGAVIPVR                 | Deamidated(N) @ 11; Label: 13C(6)15N(4)(R) @ 18                                                                   |                                 | -0.0324064  | 2028.98547 | 1015.5   | 2029.01782 | 1015.51617 | 2 | 17 | 17.663  | 26.98 |
| 9  | 54.6  | 56.93 | 78.8 MAT1A_FlexIII | 99.0 TQTVQYMQDNGAVIPVR                 | Deamidated(N) @ 11; Label: 13C(6)15N(4)(R) @ 18                                                                   |                                 | 0.0115685   | 2029.02942 | 677.3504 | 2029.01782 | 677.346558 | 3 | 17 | 17.9323 | 26.98 |
| 9  | 54.6  | 56.93 | 78.8 MAT1A_FlexIII | 99.0 TQTVQYMQDNGAVIPVR                 | Label: 13C(6)15N(4)(R) @ 18                                                                                       |                                 | -0.0083505  | 2028.02551 | 1015.02  | 2028.03381 | 1015.02417 | 2 | 11 | 21.5769 | 26.98 |
| 9  | 54.6  | 56.93 | 78.8 MAT1A_FlexIII | 99.0 TQTVQYMQDNGAVIPVR                 | Deamidated(Q) @ 6; Label: 13C(6)15N(4)(R) @ 18                                                                    |                                 | 0.0276521   | 2029.04553 | 1015.53  | 2029.01782 | 1015.51617 | 2 | 14 | 20.0546 | 26.98 |
| 9  | 54.6  | 56.93 | 78.8 MAT1A_FlexIII | 99.0 VLVQVSYAIGVAEPLSISIFTYGT SQK      | Label: 13C(6)15N(2)(K) @ 27                                                                                       |                                 | -0.00243072 | 2877.55957 | 960.1938 | 2877.56201 | 960.19458  | 3 | 21 | 26.4391 | 26.98 |
| 9  | 54.6  | 56.93 | 78.8 MAT1A_FlexIII | 99.0 VLVQVSYAIGVAEPLSISIFTYGT SQK      | Label: 13C(6)15N(2)(K) @ 27                                                                                       |                                 | 0.00368079  | 2877.56567 | 960.1958 | 2877.56201 | 960.19458  | 3 | 14 | 26.4963 | 26.98 |
| 9  | 54.6  | 56.93 | 78.8 MAT1A_FlexIII | 99.0 VLVQVSYAIGVAEPLSISIFTYGT SQK      | Deamidated(Q) @ 4; Label: 13C(6)15N(2)(K) @ 27                                                                    |                                 | 0.0224635   | 2878.56836 | 960.5301 | 2878.5459  | 960.522583 | 3 | 17 | 20.4507 | 26.98 |
| 9  | 54.6  | 56.93 | 78.8 MAT1A_FlexIII | 99.0 VLVQVSYAIGVAEPLSISIFTYGT SQK      | Deamidated(Q) @ 4; Label: 13C(6)15N(2)(K) @ 27                                                                    |                                 | 0.0184055   | 2878.56323 | 1440.289 | 2878.5459  | 1440.28027 | 2 | 17 | 20.4768 | 26.98 |
| 9  | 54.6  | 56.93 | 78.8 MAT1A_FlexIII | 99.0 VLVQVSYAIGVAEPLSISIFTYGT SQK      | Deamidated(Q) @ 4; Label: 13C(6)15N(2)(K) @ 27                                                                    |                                 | 0.0224635   | 2878.56836 | 960.5301 | 2878.5459  | 960.522583 | 3 | 13 | 21.2797 | 26.98 |
| 9  | 54.6  | 56.93 | 78.8 MAT1A_FlexIII | 99.0 YLDEDTVYHLQPSGR                   | Label: 13C(6)15N(4)(R) @ 15                                                                                       |                                 | -0.00231834 | 1801.84863 | 901.9316 | 1801.85107 | 901.9328   | 2 | 22 | 17.006  | 26.98 |
| 9  | 54.6  | 56.93 | 78.8 MAT1A_FlexIII | 99.0 YLDEDTVYHLQPSGR                   | Label: 13C(6)15N(4)(R) @ 15                                                                                       |                                 | -0.00143419 | 1801.84949 | 601.6238 | 1801.85107 | 601.624268 | 3 | 14 | 16.7166 | 26.98 |
| 9  | 54.6  | 56.93 | 78.8 MAT1A_FlexIII | 99.0 YLDEDTVYHLQPSGR                   | Label: 13C(6)15N(4)(R) @ 15                                                                                       |                                 | -0.0113219  | 1801.8396  | 601.6205 | 1801.85107 | 601.624268 | 3 | 13 | 17.2432 | 26.98 |
| 9  | 54.6  | 56.93 | 78.8 MAT1A_FlexIII | 99.0 YLDEDTVYHLQPSGR                   | Label: 13C(6)15N(4)(R) @ 15                                                                                       |                                 | -0.00161731 | 1801.84949 | 601.6238 | 1801.85107 | 601.624268 | 3 | 12 | 16.9811 | 26.98 |
| 9  | 54.6  | 56.93 | 78.8 MAT1A_FlexIII | 99.0 YPTFLYK                           | Label: 13C(6)15N(2)(K) @ 7                                                                                        | cleaved F-Y @ N-term            | -0.00165037 | 938.497681 | 470.2561 | 938.499329 | 470.256928 | 2 | 9  | 18.0092 | 26.98 |
| 9  | 54.6  | 56.93 | 78.8 MAT1A_FlexIII | 99.0 YPTFLYK                           | Label: 13C(6)15N(2)(K) @ 7                                                                                        | cleaved F-Y @ N-term            | 0.00020099  | 938.499451 | 470.257  | 938.499329 | 470.256928 | 2 | 9  | 17.9008 | 26.98 |
| 9  | 54.6  | 56.93 | 78.8 MAT1A_FlexIII | 99.0 YPTFLYK                           | Label: 13C(6)15N(2)(K) @ 7                                                                                        | cleaved F-Y @ N-term            | -0.00091407 | 938.498474 | 470.2565 | 938.499329 | 470.256928 | 2 | 9  | 17.7612 | 26.98 |
| 10 | 53.11 | 55.13 | 57.4 TP53_FlexIII  | 99.0 ALPNNSSSPQPK                      | Label: 13C(6)15N(2)(K) @ 13                                                                                       |                                 | -0.00027699 | 1347.68713 | 674.8508 | 1347.68738 | 674.850952 | 2 | 10 | 13.7978 | 9.55  |
| 10 | 53.11 | 55.13 | 57.4 TP53_FlexIII  | 99.0 CSDSDGLAPPOHLIR                   | Propionamide(C) @ 1                                                                                               |                                 | -0.00120856 | 1678.80847 | 560.6101 | 1678.80969 | 560.610535 | 3 | 13 | 16.4297 | 9.55  |
| 10 | 53.11 | 55.13 | 57.4 TP53_FlexIII  | 99.0 ELNEALELK                         | Label: 13C(6)15N(2)(K) @ 9                                                                                        |                                 | -0.00066434 | 1065.5791  | 533.7968 | 1065.57971 | 533.797119 | 2 | 11 | 17.0498 | 9.55  |
| 10 | 53.11 | 55.13 | 57.4 TP53_FlexIII  | 99.0 ELNEALELKDAQAKEPGGSR              | Label: 13C(6)15N(2)(K) @ 9; Label: 13C(6)15N(2)(K) @ 15; Label: 13C(6)15N(4)(R) @ 21                              |                                 | -0.0113387  | 2237.13843 | 746.7201 | 2237.1499  | 746.723877 | 3 | 16 | 15.8643 | 9.55  |
| 10 | 53.11 | 55.13 | 57.4 TP53_FlexIII  | 99.0 HSVVPYPPEVGSDDCTIHHNYMCNSSCMGGMNR | Propionamide(C) @ 16; Propionamide(C) @ 25; Deamidated(N) @ 26; Propionamide(C) @ 29; Label: 13C(6)15N(4)(R) @ 35 | missed K-D @ 9; missed K-E @ 15 | -0.00251191 | 4100.71387 | 821.1501 | 4100.7168  | 821.150635 | 5 | 12 | 17.7771 | 9.55  |
| 10 | 53.11 | 55.13 | 57.4 TP53_FlexIII  | 99.0 KGEPHHELPPGSKT                    | Label: 13C(6)15N(2)(K) @ 1; Label: 13C(6)15N(2)(K) @ 14                                                           | missed K-G @ 1                  | 0.00089044  | 1528.79773 | 510.6065 | 1528.79688 | 510.606232 | 3 | 14 | 8.3113  | 9.55  |
| 10 | 53.11 | 55.13 | 57.4 TP53_FlexIII  | 99.0 KGEPHHELPPGSKT                    | Label: 13C(6)15N(2)(K) @ 1; Label: 13C(6)15N(2)(K) @ 14; Label: 13C(6)15N(4)(R) @ 15                              | missed K-G @ 1; missed K-R @ 14 | -0.014855   | 1694.89136 | 424.7301 | 1694.90625 | 424.733856 | 4 | 15 | 7.8776  | 9.55  |
| 10 | 53.11 | 55.13 | 57.4 TP53_FlexIII  | 99.0 KKGEPHHELPPGSKT                   | Label: 13C(6)15N(2)(K) @ 1; Label: 13C(6)15N(2)(K) @ 2; Label: 13C(6)15N(2)(K) @ 15                               | missed K-K @ 1; missed K-G @ 2  | -0.00023358 | 1664.90576 | 417.2337 | 1664.90601 | 417.233795 | 4 | 11 | 7.3942  | 9.55  |
| 10 | 53.11 | 55.13 | 57.4 TP53_FlexIII  | 99.0 KKPLDGEYFTLQIR                    | Label: 13C(6)15N(2)(K) @ 1; Label: 13C(6)15N(2)(K) @ 2; Label: 13C(6)15N(4)(R) @ 14                               | missed K-K @ 1                  | -0.00167789 | 1732.97058 | 578.6641 | 1732.97217 | 578.664673 | 3 | 16 | 17.975  | 9.55  |
| 10 | 53.11 | 55.13 | 57.4 TP53_FlexIII  | 99.0 LGFLHSGETAK                       | Label: 13C(6)15N(2)(K) @ 10                                                                                       |                                 | -0.00146979 | 1037.57349 | 519.794  | 1037.57495 | 519.794739 | 2 | 14 | 15.938  | 9.55  |
| 10 | 53.11 | 55.13 | 57.4 TP53_FlexIII  | 99.0 MFCQLAK                           | Propionamide(C) @ 3; Label: 13C(6)15N(2)(K) @ 7                                                                   |                                 | -0.00897001 | 918.445679 | 460.2301 | 918.454651 | 460.234619 | 2 | 9  | 16.2258 | 9.55  |
| 10 | 53.11 | 55.13 | 57.4 TP53_FlexIII  | 99.0 MPEAAAPR                          | Label: 13C(6)15N(4)(R) @ 7                                                                                        |                                 | -0.00012213 | 780.38269  | 391.1986 | 780.382752 | 391.198669 | 2 | 8  | 13.9603 | 9.55  |
| 10 | 53.11 | 55.13 | 57.4 TP53_FlexIII  | 99.0 QSQHMTVEVR                        | Gln->pyro-Glu @ N-term                                                                                            | Gln->pyro-Glu @ N-term          | 0.00484487  | 1196.56567 | 599.2901 | 1196.56079 | 599.287659 | 2 | 13 | 15.2765 | 9.55  |
| 10 | 53.11 | 55.13 | 57.4 TP53_FlexIII  | 99.0 QSQHMTVEVR                        | Gln->pyro-Glu @ N-term; Label: 13C(6)15N(4)(R) @ 10; Label: 13C(6)15N(4)(R) @ 11                                  | missed R-R @ 10                 | -0.00293559 | 1372.67542 | 687.345  | 1372.67847 | 687.346497 | 2 | 14 | 14.6103 | 9.55  |
| 10 | 53.11 | 55.13 | 57.4 TP53_FlexIII  | 99.0 RALPNNTSSSPQPK                    | Label: 13C(6)15N(4)(R) @ 1; Label: 13C(6)15N(2)(K) @ 14                                                           | missed R-A @ 1                  | 0.00887813  | 1513.80566 | 757.9101 | 1513.79675 | 757.90564  | 2 | 12 | 13.048  | 9.55  |
| 10 | 53.11 | 55.13 | 57.4 TP53_FlexIII  | 99.0 RPILITLEDSSGNLGR                  | Label: 13C(6)15N(4)(R) @ 1; Label: 13C(6)15N(4)(R) @ 19                                                           |                                 | -0.0168491  | 2087.16846 | 696.7301 | 2087.1853  | 696.735718 | 3 | 24 | 19.6052 | 9.55  |
| 10 | 53.11 | 55.13 | 57.4 TP53_FlexIII  | 99.0 RTEENLNR                          | Label: 13C(6)15N(4)(R) @ 1; Label: 13C(6)15N(4)(R) @ 8                                                            | missed R-T @ 1                  | -0.00604365 | 1065.52584 | 533.7701 | 1065.53174 | 533.773193 | 2 | 8  | 9.5721  | 9.55  |
| 10 | 53.11 | 55.13 | 57.4 TP53_FlexIII  | 99.0 SVTCTYSPALNK                      | Propionamide(C) @ 4                                                                                               |                                 | 0.00590171  | 1353.66565 | 677.8401 | 1353.65991 | 677.837219 | 2 | 12 | 15.8062 | 9.55  |
| 10 | 53.11 | 55.13 | 57.4 TP53_FlexIII  | 99.0 TCPVQLWVDSTPPPGTR                 | Propionamide(C) @ 2; Label: 13C(6)15N(4)(R) @ 17                                                                  |                                 | -0.00142311 | 1933.95813 | 967.9863 | 1933.9596  | 967.987061 | 2 | 20 | 18.9297 | 9.55  |
| 10 | 53.11 | 55.13 | 57.4 TP53_FlexIII  | 99.0 TVQGSYGR                          | Label: 13C(6)15N(4)(R) @ 9                                                                                        |                                 | -0.00089226 | 1087.49524 | 544.7549 | 1087.49622 | 544.755371 | 2 | 9  | 16.2694 | 9.55  |
| 10 | 53.11 | 55.13 | 57.4 TP53_FlexIII  | 99.0 VAPAAPAPTAAAPAPAPSWLSSSVSPSQK     | Label: 13C(6)15N(2)(K) @ 29                                                                                       |                                 | -0.006734   | 2757.45142 | 690.3701 | 2757.45801 | 690.371826 | 4 | 23 | 18.4543 | 9.55  |
| 10 | 53.11 | 55.13 | 57.4 TP53_FlexIII  | 99.0 VEGNLRVLYDDR                      | Label: 13C(6)15N(4)(R) @ 6; Label: 13C(6)15N(4)(R) @ 13                                                           | missed R-V @ 6                  | 0.00458027  | 1596.80566 | 799.4101 | 1596.80103 | 799.407837 | 2 | 12 | 16.7262 | 9.55  |
| 10 | 53.11 | 55.13 | 57.4 TP53_FlexIII  | 99.0 VEYLDNRNTR                        | Label: 13C(6)15N(4)(R) @ 7; Label: 13C(6)15N(4)(R) @ 11                                                           | missed R-N @ 7                  | 0.0050427   | 1446.70569 | 724.3601 | 1446.70068 | 724.357605 | 2 | 10 | 16.1866 | 9.55  |
| 10 | 53.11 | 55.13 | 57.4 TP53_FlexIII  | 99.0 ALPNNSSSPQPK                      | Deamidated(N) @ 5; Label: 13C(6)15N(2)(K) @ 13                                                                    |                                 | -0.00028375 | 1348.67102 | 675.3428 | 1348.67139 | 675.342957 | 2 | 10 | 14.3386 | 9.55  |
| 10 | 53.11 | 55.13 | 57.4 TP53_FlexIII  | 99.0 CSDSDGLAPPOHLIR                   | Propionamide(C) @ 1; Label: 13C(6)15N(4)(R) @ 15                                                                  |                                 | 0.0106034   | 1688.82837 | 563.9501 | 1688.81799 | 563.946594 | 3 | 17 | 16.3716 | 9.55  |
| 10 | 53.11 | 55.13 | 57.4 TP53_FlexIII  | 99.0 CSDSDGLAPPOHLIR                   | Propionamide(C) @ 1; Label: 13C(6)15N(4)(R) @ 15                                                                  |                                 | -0.00303978 | 1688.81482 | 845.4147 | 1688.81799 | 845.41626  | 2 | 24 | 16.3982 | 9.55  |
| 10 | 53.11 | 55.13 | 57.4 TP53_FlexIII  | 99.0 CSDSDGLAPPOHLIR                   | Propionamide(C) @ 1; Label: 13C(6)15N(4)(R) @ 15                                                                  |                                 | -0.00258018 | 1688.81519 | 563.9457 | 1688.81799 | 563.946594 | 3 | 17 | 16.6437 | 9.55  |
| 10 | 53.11 | 55.13 | 57.4 TP53_FlexIII  | 99.0 CSDSDGLAPPOHLIR                   | Propionamide(C) @ 1; Label: 13C(6)15N(4)(R) @ 15                                                                  |                                 | -0.0029177  | 1688.81506 | 845.4148 | 1688.81799 | 845.41626  | 2 | 21 | 16.6675 | 9.55  |
| 10 | 53.11 | 55.13 | 57.4 TP53_FlexIII  | 99.0 ELNEALELKDAQAKEPGGSR              | Label: 13C(6)15N(2)(K) @ 9; Label: 13C(6)15N(2)(K) @ 15; Label: 13C(6)15N(4)(R) @                                 |                                 |             |            |          |            |            |   |    |         |       |

|    |       |       |                     |                                       |                                                                                                                                                                  |             |            |          |            |             |   |    |         |      |
|----|-------|-------|---------------------|---------------------------------------|------------------------------------------------------------------------------------------------------------------------------------------------------------------|-------------|------------|----------|------------|-------------|---|----|---------|------|
| 10 | 53.11 | 55.13 | 57.4 TP53_FlexIII   | 99.0 LGFLHSGTAK                       | Label: 13C(6)15N(2)(K) @ 10                                                                                                                                      | -0.00146979 | 1037.57349 | 519.794  | 1037.57495 | 519.794739  | 2 | 15 | 16.2022 | 9.55 |
| 10 | 53.11 | 55.13 | 57.4 TP53_FlexIII   | 99.0 LGFLHSGTAK                       | Label: 13C(6)15N(2)(K) @ 10                                                                                                                                      | 0.0135772   | 1037.58838 | 346.8701 | 1037.57495 | 346.865601  | 3 | 9  | 15.9337 | 9.55 |
| 10 | 53.11 | 55.13 | 57.4 TP53_FlexIII   | 99.0 QSQHMTVEVVR                      | Label: 13C(6)15N(4)(R) @ 10                                                                                                                                      | 0.0003011   | 1223.59583 | 612.8052 | 1223.59558 | 612.805115  | 2 | 15 | 13.8643 | 9.55 |
| 10 | 53.11 | 55.13 | 57.4 TP53_FlexIII   | 99.0 QSQHMTVEVVR                      | Gln->pyro-Glu @ N-term; Label: 13C(6)15N(4)(R) @ 10                                                                                                              | -0.00134853 | 1206.56763 | 604.2911 | 1206.56909 | 604.291809  | 2 | 14 | 15.2228 | 9.55 |
| 10 | 53.11 | 55.13 | 57.4 TP53_FlexIII   | 99.0 QSQHMTVEVVR                      | Gln->pyro-Glu @ N-term; Label: 13C(6)15N(4)(R) @ 10                                                                                                              | -0.00256923 | 1206.56653 | 604.2905 | 1206.56909 | 604.291809  | 2 | 14 | 15.4909 | 9.55 |
| 10 | 53.11 | 55.13 | 57.4 TP53_FlexIII   | 99.0 QSQHMTVEVVR                      | Gln->pyro-Glu @ N-term; Oxidation(M) @ 5; Label: 13C(6)15N(4)(R) @ 10                                                                                            | 0.00166212  | 1222.56567 | 612.2901 | 1222.56397 | 612.289246  | 2 | 12 | 13.6519 | 9.55 |
| 10 | 53.11 | 55.13 | 57.4 TP53_FlexIII   | 99.0 QSQHMTVEVVR                      | Label: 13C(6)15N(4)(R) @ 10; Label: 13C(6)15N(4)(R) @ 11                                                                                                         | 0.00066716  | 1389.70569 | 695.8601 | 1389.70496 | 695.859802  | 2 | 11 | 13.1214 | 9.55 |
| 10 | 53.11 | 55.13 | 57.4 TP53_FlexIII   | 99.0 RALPNNTSSSPQPK                   | Label: 13C(6)15N(4)(R) @ 1; Label: 13C(6)15N(2)(K) @ 14                                                                                                          | 0.0117181   | 1513.80847 | 505.6101 | 1513.79675 | 505.606201  | 3 | 14 | 13.0177 | 9.55 |
| 10 | 53.11 | 55.13 | 57.4 TP53_FlexIII   | 99.0 RALPNNTSSSPQPK                   | Label: 13C(6)15N(4)(R) @ 1; Deamidated(N) @ 5; Label: 13C(6)15N(2)(K) @ 14                                                                                       | 0.00496512  | 1514.78565 | 758.4001 | 1514.78076 | 758.397644  | 2 | 15 | 13.5482 | 9.55 |
| 10 | 53.11 | 55.13 | 57.4 TP53_FlexIII   | 99.0 RPLTITLEDSSGNLLGR                | Label: 13C(6)15N(4)(R) @ 1; Deamidated(N) @ 15; Label: 13C(6)15N(4)(R) @ 19                                                                                      | 0.0163149   | 2088.1853  | 1045.1   | 2088.16943 | 1045.09192  | 2 | 14 | 19.6272 | 9.55 |
| 10 | 53.11 | 55.13 | 57.4 TP53_FlexIII   | 99.0 RPLTITLEDSSGNLLGR                | Label: 13C(6)15N(4)(R) @ 1; Label: 13C(6)15N(4)(R) @ 19                                                                                                          | -0.0140091  | 2087.17139 | 522.8001 | 2087.1853  | 522.803589  | 4 | 21 | 19.735  | 9.55 |
| 10 | 53.11 | 55.13 | 57.4 TP53_FlexIII   | 99.0 RPLTITLEDSSGNLLGR                | Label: 13C(6)15N(4)(R) @ 1; Label: 13C(6)15N(4)(R) @ 19                                                                                                          | -0.0038486  | 2087.1814  | 696.7344 | 2087.1853  | 696.735718  | 3 | 22 | 19.8654 | 9.55 |
| 10 | 53.11 | 55.13 | 57.4 TP53_FlexIII   | 99.0 RPLTITLEDSSGNLLGR                | Label: 13C(6)15N(4)(R) @ 1; Label: 13C(6)15N(4)(R) @ 19                                                                                                          | -0.0168491  | 2087.16846 | 696.7301 | 2087.1853  | 696.735718  | 3 | 18 | 20.2114 | 9.55 |
| 10 | 53.11 | 55.13 | 57.4 TP53_FlexIII   | 99.0 RPLTITLEDSSGNLLGR                | Label: 13C(6)15N(4)(R) @ 1; Label: 13C(6)15N(4)(R) @ 19                                                                                                          | 0.0131802   | 2087.19849 | 696.7401 | 2087.1853  | 696.735718  | 3 | 9  | 26.8314 | 9.55 |
| 10 | 53.11 | 55.13 | 57.4 TP53_FlexIII   | 99.0 RPLTITLEDSSGNLLGR                | Label: 13C(6)15N(4)(R) @ 1; Deamidated(N) @ 15; Label: 13C(6)15N(4)(R) @ 19                                                                                      | 0.0192159   | 2088.18848 | 697.0701 | 2088.16943 | 697.063721  | 3 | 11 | 26.5389 | 9.55 |
| 10 | 53.11 | 55.13 | 57.4 TP53_FlexIII   | 99.0 RPLTITLEDSSGNLLGR                | Label: 13C(6)15N(4)(R) @ 1; Label: 13C(6)15N(4)(R) @ 19                                                                                                          | -0.0178079  | 2087.16748 | 696.7298 | 2087.1853  | 696.735718  | 3 | 17 | 19.7108 | 9.55 |
| 10 | 53.11 | 55.13 | 57.4 TP53_FlexIII   | 99.0 RPLTITLEDSSGNLLGR                | Label: 13C(6)15N(4)(R) @ 1; Deamidated(N) @ 15; Label: 13C(6)15N(4)(R) @ 19                                                                                      | 0.0163149   | 2088.1853  | 1045.1   | 2088.16943 | 1045.09192  | 2 | 10 | 19.8953 | 9.55 |
| 10 | 53.11 | 55.13 | 57.4 TP53_FlexIII   | 99.0 SVTCTYSPALNK                     | Propionamide(C) @ 4; Label: 13C(6)15N(2)(K) @ 12                                                                                                                 | -0.00133901 | 1361.67273 | 681.8436 | 1361.67407 | 681.844299  | 2 | 11 | 15.8997 | 9.55 |
| 10 | 53.11 | 55.13 | 57.4 TP53_FlexIII   | 99.0 TCPVQLWVDSTPPPGTR                | Propionamide(C) @ 2; Label: 13C(6)15N(4)(R) @ 17                                                                                                                 | -0.00117897 | 1933.9585  | 967.9865 | 1933.9596  | 967.987061  | 2 | 20 | 18.6541 | 9.55 |
| 10 | 53.11 | 55.13 | 57.4 TP53_FlexIII   | 99.0 TCPVQLWVDSTPPPGTR                | Propionamide(C) @ 2; Label: 13C(6)15N(4)(R) @ 17                                                                                                                 | -0.00071938 | 1933.95886 | 645.6602 | 1933.9596  | 645.660461  | 3 | 16 | 18.6562 | 9.55 |
| 10 | 53.11 | 55.13 | 57.4 TP53_FlexIII   | 99.0 TCPVQLWVDSTPPPGTR                | Propionamide(C) @ 2; Label: 13C(6)15N(4)(R) @ 17                                                                                                                 | -0.00108559 | 1933.9585  | 645.6601 | 1933.9596  | 645.660461  | 3 | 14 | 18.9319 | 9.55 |
| 10 | 53.11 | 55.13 | 57.4 TP53_FlexIII   | 99.0 VAPAPAAPTPAAPAPAPSWPLSSSVPSQK    | Label: 13C(6)15N(2)(K) @ 29                                                                                                                                      | -0.00200561 | 2757.45606 | 920.1593 | 2757.45801 | 920.159973  | 3 | 21 | 18.6497 | 9.55 |
| 10 | 53.11 | 55.13 | 57.4 TP53_FlexIII   | 99.0 VAPAPAAPTPAAPAPAPSWPLSSSVPSQK    | Deamidated(Q) @ 28; Label: 13C(6)15N(2)(K) @ 29                                                                                                                  | 0.00641048  | 2758.44849 | 920.4901 | 2758.44214 | 920.487976  | 3 | 11 | 18.3904 | 9.55 |
| 10 | 53.11 | 55.13 | 57.4 TP53_FlexIII   | 99.0 VAPAPAAPTPAAPAPAPSWPLSSSVPSQK    | Deamidated(Q) @ 28; Label: 13C(6)15N(2)(K) @ 29                                                                                                                  | 0.0235901   | 2758.46533 | 1380.24  | 2758.44214 | 1380.22839  | 2 | 11 | 18.4307 | 9.55 |
| 10 | 53.11 | 55.13 | 57.4 TP53_FlexIII   | 99.0 VEGNLRVYLDDR                     | Label: 13C(6)15N(4)(R) @ 6; Label: 13C(6)15N(4)(R) @ 13                                                                                                          | -0.0124772  | 1596.78845 | 533.2701 | 1596.80103 | 533.274292  | 3 | 11 | 16.6744 | 9.55 |
| 10 | 53.11 | 55.13 | 57.4 TP53_FlexIII   | 99.0 YPTFLYK                          | Label: 13C(6)15N(2)(K) @ 7                                                                                                                                       | -0.00165037 | 938.497681 | 470.2561 | 938.499329 | 470.256928  | 2 | 9  | 18.0092 | 9.55 |
| 10 | 53.11 | 55.13 | 57.4 TP53_FlexIII   | 99.0 YPTFLYK                          | Label: 13C(6)15N(2)(K) @ 7                                                                                                                                       | 0.00020099  | 938.499451 | 470.257  | 938.499329 | 470.256928  | 2 | 9  | 17.9008 | 9.55 |
| 10 | 53.11 | 55.13 | 57.4 TP53_FlexIII   | 99.0 YPTFLYK                          | Label: 13C(6)15N(2)(K) @ 7                                                                                                                                       | -0.00091407 | 938.498474 | 470.2565 | 938.499329 | 470.256928  | 2 | 9  | 17.7612 | 9.55 |
| 11 | 52.74 | 54.75 | 70.6 HOXC10_FlexIII | 99.0 AADSSPDTSDNEAKEEIK               | Label: 13C(6)15N(2)(K) @ 14; Label: 13C(6)15N(2)(K) @ 18                                                                                                         | -0.00461119 | 1921.8678  | 641.6299 | 1921.87231 | 641.631409  | 3 | 16 | 14.0283 | 7.09 |
| 11 | 52.74 | 54.75 | 70.6 HOXC10_FlexIII | 99.0 AADSSPDTSDNEAKEEIKAEINTGNWLTAK   | Deamidated(N) @ 11; Label: 13C(6)15N(2)(K) @ 14; Label: 13C(6)15N(2)(K) @ 18; Label: 13C(6)15N(2)(K) @ 30                                                        | 0.0119073   | 3217.5083  | 1073.51  | 3217.49609 | 1073.505698 | 3 | 15 | 16.8921 | 7.09 |
| 11 | 52.74 | 54.75 | 70.6 HOXC10_FlexIII | 99.0 AEHLESPQLGGK                     | Label: 13C(6)15N(2)(K) @ 12                                                                                                                                      | -0.0101772  | 1272.64526 | 637.3299 | 1272.6554  | 637.334961  | 2 | 19 | 14.8587 | 7.09 |
| 11 | 52.74 | 54.75 | 70.6 HOXC10_FlexIII | 99.0 ASPSYSALKD                       | Label: 13C(6)15N(2)(K) @ 10                                                                                                                                      | -0.00016718 | 1045.51685 | 523.7657 | 1045.51709 | 523.765869  | 2 | 11 | 15.2602 | 7.09 |
| 11 | 52.74 | 54.75 | 70.6 HOXC10_FlexIII | 99.0 DEGSSPSLANTYPSYLSQLDSWDGPK       | Deamidated(N) @ 11; Label: 13C(6)15N(2)(K) @ 27                                                                                                                  | 0.0162581   | 2935.36523 | 1468.69  | 2935.34912 | 1468.68176  | 2 | 22 | 20.0517 | 7.09 |
| 11 | 52.74 | 54.75 | 70.6 HOXC10_FlexIII | 99.0 EENVCCMYSAEK                     | Propionamide(C) @ 5; Propionamide(C) @ 6; Label: 13C(6)15N(2)(K) @ 12                                                                                            | 0.00081864  | 1554.62524 | 778.3199 | 1554.62439 | 778.319458  | 2 | 12 | 15.9759 | 7.09 |
| 11 | 52.74 | 54.75 | 70.6 HOXC10_FlexIII | 99.0 EENVCCMYSAEKR                    | Propionamide(C) @ 5; Propionamide(C) @ 6; Label: 13C(6)15N(2)(K) @ 12; Label: 13C(6)15N(4)(R) @ 13                                                               | -0.00855572 | 1720.72522 | 861.3699 | 1720.73377 | 861.374146  | 2 | 16 | 15.4735 | 7.09 |
| 11 | 52.74 | 54.75 | 70.6 HOXC10_FlexIII | 99.0 EFLFNMYLTR                       | Label: 13C(6)15N(4)(R) @ 10                                                                                                                                      | 0.0033061   | 1342.66528 | 672.3399 | 1342.66187 | 672.338257  | 2 | 10 | 20.1799 | 7.09 |
| 11 | 52.74 | 54.75 | 70.6 HOXC10_FlexIII | 99.0 GCGLAPLSLK                       | Propionamide(C) @ 2; Label: 13C(6)15N(2)(K) @ 10                                                                                                                 | -0.00068274 | 1010.53027 | 506.2724 | 1010.53101 | 506.272797  | 2 | 12 | 16.0743 | 7.09 |
| 11 | 52.74 | 54.75 | 70.6 HOXC10_FlexIII | 99.0 GCGLAPLSKSR                      | Propionamide(C) @ 2; Label: 13C(6)15N(2)(K) @ 10; Label: 13C(6)15N(4)(R) @ 11                                                                                    | -0.0010837  | 1176.64026 | 589.3274 | 1176.64038 | 589.327454  | 2 | 13 | 15.1927 | 7.09 |
| 11 | 52.74 | 54.75 | 70.6 HOXC10_FlexIII | 99.0 HQTLEKEFLFNMYLTR                 | Label: 13C(6)15N(2)(K) @ 8; Label: 13C(6)15N(4)(R) @ 18                                                                                                          | 0.0181672   | 2329.20801 | 777.4099 | 2329.18945 | 777.403809  | 3 | 16 | 19.0677 | 7.09 |
| 11 | 52.74 | 54.75 | 70.6 HOXC10_FlexIII | 99.0 LEQPVGRPLSSCSYPPSVK              | Label: 13C(6)15N(4)(R) @ 7; Propionamide(C) @ 12; Label: 13C(6)15N(2)(K) @ 19                                                                                    | 0.0023421   | 2132.10791 | 711.7099 | 2132.10547 | 711.709106  | 3 | 12 | 16.5491 | 7.09 |
| 11 | 52.74 | 54.75 | 70.6 HOXC10_FlexIII | 99.0 LEQPVGRPLSSCSYPPSVKEENVCCMYSAEK  | Deamidated(Q) @ 3; Label: 13C(6)15N(4)(R) @ 7; Propionamide(C) @ 12; Label: 13C(6)15N(2)(K) @ 19; Propionamide(C) @ 24; Propion missed K-E @ 19                  | 0.0271746   | 3669.73047 | 918.4399 | 3669.70337 | 918.433106  | 4 | 13 | 16.8641 | 7.09 |
| 11 | 52.74 | 54.75 | 70.6 HOXC10_FlexIII | 99.0 NVTPNSYAEPLAAGGGGR               | Label: 13C(6)15N(4)(R) @ 14; Label: 13C(6)15N(4)(R) @ 18                                                                                                         | -0.00694494 | 1898.90552 | 950.46   | 1898.91223 | 950.463379  | 2 | 18 | 16.7793 | 7.09 |
| 11 | 52.74 | 54.75 | 70.6 HOXC10_FlexIII | 99.0 RDEGSSPSLANTYPSYLSQLDSWDGPK      | Label: 13C(6)15N(4)(R) @ 1; Label: 13C(6)15N(2)(K) @ 28                                                                                                          | 0.0035021   | 3100.47827 | 1034.5   | 3100.47437 | 1034.49878  | 3 | 25 | 19.4869 | 7.09 |
| 11 | 52.74 | 54.75 | 70.6 HOXC10_FlexIII | 99.0 SAGMYMQSGDFNCGVMR                | Propionamide(C) @ 14; Label: 13C(6)15N(4)(R) @ 18                                                                                                                | -0.00865766 | 2020.80542 | 1011.41  | 2020.81384 | 1011.41425  | 2 | 16 | 21.1419 | 7.09 |
| 11 | 52.74 | 54.75 | 70.6 HOXC10_FlexIII | 99.0 SDSQTPSPNEIK                     | Label: 13C(6)15N(2)(K) @ 12                                                                                                                                      | 0.00105051  | 1309.62524 | 655.8199 | 1309.62415 | 655.819336  | 2 | 12 | 14.6297 | 7.09 |
| 11 | 52.74 | 54.75 | 70.6 HOXC10_FlexIII | 99.0 SDSQTPSPNEIKTEQSLAGPK            | Label: 13C(6)15N(2)(K) @ 12; Label: 13C(6)15N(2)(K) @ 21                                                                                                         | -0.00412584 | 2229.10547 | 1115.56  | 2229.10962 | 1115.56201  | 2 | 26 | 15.7402 | 7.09 |
| 11 | 52.74 | 54.75 | 70.6 HOXC10_FlexIII | 99.0 SGPEAALYSHLPESCLGEHVPVPSYYR      | Propionamide(C) @ 16; Label: 13C(6)15N(4)(R) @ 29                                                                                                                | -0.00315783 | 3264.53931 | 1089.187 | 3264.54248 | 1089.18811  | 3 | 21 | 18.0898 | 7.09 |
| 11 | 52.74 | 54.75 | 70.6 HOXC10_FlexIII | 99.0 TINLTD                           | Label: 13C(6)15N(4)(R) @ 7                                                                                                                                       | -0.00100136 | 841.452271 | 421.7334 | 841.453308 | 421.733917  | 2 | 8  | 15.732  | 7.09 |
| 11 | 52.74 | 54.75 | 70.6 HOXC10_FlexIII | 99.0 TPHCSGANDFEAPFEQR                | Propionamide(C) @ 4; Label: 13C(6)15N(4)(R) @ 17                                                                                                                 | -0.00065616 | 1985.85594 | 993.9352 | 1985.85657 | 993.935547  | 2 | 18 | 17.0084 | 7.09 |
| 11 | 52.74 | 54.75 | 70.6 HOXC10_FlexIII | 99.0 VSFPTPKSDSQTPSPNEIK              | Label: 13C(6)15N(2)(K) @ 8; Label: 13C(6)15N(2)(K) @ 20                                                                                                          | 0.01985556  | 2203.11792 | 735.3799 | 2203.0979  | 735.37323   | 3 | 13 | 16.2788 | 7.09 |
| 11 | 52.74 | 54.75 | 70.6 HOXC10_FlexIII | 99.0 VSFPTPKSDSQTPSPNEIKTEQSLAGPK     | Label: 13C(6)15N(2)(K) @ 8; Deamidated(N) @ 17; Label: 13C(6)15N(2)(K) @ 20; Label: 13C(6)15N(2)(K) @ 29                                                         | 0.00404295  | 3123.60815 | 1042.21  | 3123.56738 | 1042.19641  | 3 | 15 | 16.5218 | 7.09 |
| 11 | 52.74 | 54.75 | 70.6 HOXC10_FlexIII | 99.0 LEQPVGRPLSSCSYPPSVKEENVCCMYSAEKR | Deamidated(Q) @ 3; Label: 13C(6)15N(4)(R) @ 7; Propionamide(C) @ 12; Label: 13C(6)15N(2)(K) @ 19; Propionamide(C) @ 24; Propion missed K-E @ 19; missed K-R @ 31 | 0.00019081  | 3835.81323 | 768.1699 | 3835.81274 | 768.1698    | 5 | 18 | 16.7078 | 7.09 |
| 11 | 52.74 | 54.75 | 70.6 HOXC10_FlexIII | 99.0 ASPSYSALKDTPHCSGANDFEAPFEQR      | Label: 13C(6)15N(2)(K) @ 10; Propionamide(C) @ 14; Deamidated(N) @ 18; Label: 13C(6)15N(4)(R) @ 27                                                               | 0.0307589   | 3014.37817 | 1005.8   | 3014.34717 | 1005.78967  | 3 | 11 | 17.4235 | 7.09 |
| 11 | 52.74 | 54.75 | 70.6 HOXC10_FlexIII | 99.0 AEHLESPQLGGK                     | Label: 13C(6)15N(2)(K) @ 12                                                                                                                                      | -0.00062602 | 1272.65466 | 425.2255 | 1272.6554  | 425.225739  | 3 | 13 | 15.0999 | 7.09 |
| 11 | 52.74 | 54.75 | 70.6 HOXC10_FlexIII | 99.0 AEHLESPQLGGK                     | Label: 13C(6)15N(2)(K) @ 12                                                                                                                                      | -0.00126606 | 1272.6543  | 637.3344 | 1272.6554  | 637.334961  | 2 | 18 | 15.1221 | 7.09 |
| 11 | 52.74 | 54.75 | 70.6 HOXC10_FlexIII | 99.0 AEHLESPQLGGK                     | Label: 13C(6)15N(2)(K) @ 12                                                                                                                                      | -0.00273173 | 1272.65259 | 425.2248 | 1272.6554  | 425.225739  | 3 | 13 | 14.8367 | 7.09 |
| 11 | 52.74 | 54.75 | 70.6 HOXC10_FlexIII | 99.0 AEHLESPQLGGK                     | Label: 13C(6)15N(2)(K) @ 12                                                                                                                                      | -0.0177464  | 1272.63757 | 425.2198 | 1272.6554  | 425.225739  | 3 | 12 | 15.454  | 7.09 |
| 11 | 52.74 | 54.75 | 70.6 HOXC10_FlexIII | 99.0 AEHLESPQLGGK                     | Label: 13C(6)15N(2)(K) @ 12                                                                                                                                      | -0.00062602 | 1272.65466 | 425.2255 | 1272.6554  | 4           |   |    |         |      |

|    |       |       |                      |                                   |                                                                                                   |                    |             |            |            |            |            |    |         |         |      |
|----|-------|-------|----------------------|-----------------------------------|---------------------------------------------------------------------------------------------------|--------------------|-------------|------------|------------|------------|------------|----|---------|---------|------|
| 11 | 52.74 | 54.75 | 70.6 HOXC10_FlexII   | 99.0 NVTPSNYAEPLAAGGGGER          | Label: 13C(6)15N(4)(R)@19                                                                         | -0.00324913        | 1908.91724  | 955.4659   | 1908.92053 | 955.467529 | 2          | 19 | 16.9077 | 7.09    |      |
| 11 | 52.74 | 54.75 | 70.6 HOXC10_FlexII   | 99.0 SAGMYMQSGSDFNCGVMR           | Deamidated(Q)@7; Propionamide(C)@14; Label: 13C(6)15N(4)(R)@18                                    | 0.0273465          | 2021.82544  | 1011.92    | 2021.79785 | 1011.90625 | 2          | 15 | 17.4344 | 7.09    |      |
| 11 | 52.74 | 54.75 | 70.6 HOXC10_FlexII   | 99.0 SAGMYMQSGSDFNCGVMR           | Propionamide(C)@14; Label: 13C(6)15N(4)(R)@18                                                     | -0.00142582        | 2020.81274  | 674.6115   | 2020.81384 | 674.611877 | 3          | 20 | 17.4795 | 7.09    |      |
| 11 | 52.74 | 54.75 | 70.6 HOXC10_FlexII   | 99.0 SAGMYMQSGSDFNCGVMR           | Propionamide(C)@14; Label: 13C(6)15N(4)(R)@18                                                     | 0.00037555         | 2020.81348  | 1011.414   | 2020.81384 | 1011.41425 | 2          | 21 | 17.7147 | 7.09    |      |
| 11 | 52.74 | 54.75 | 70.6 HOXC10_FlexII   | 99.0 SAGMYMQSGSDFNCGVMR           | Deamidated(Q)@7; Propionamide(C)@14; Label: 13C(6)15N(4)(R)@18                                    | 0.0273465          | 2021.82544  | 1011.92    | 2021.79785 | 1011.90625 | 2          | 18 | 18.2058 | 7.09    |      |
| 11 | 52.74 | 54.75 | 70.6 HOXC10_FlexII   | 99.0 SAGMYMQSGSDFNCGVMR           | Deamidated(Q)@7; Propionamide(C)@14; Label: 13C(6)15N(4)(R)@18                                    | 0.0273465          | 2021.82544  | 1011.92    | 2021.79785 | 1011.90625 | 2          | 15 | 20.8315 | 7.09    |      |
| 11 | 52.74 | 54.75 | 70.6 HOXC10_FlexII   | 99.0 SAGMYMQSGSDFNCGVMR           | Deamidated(Q)@7; Propionamide(C)@14; Label: 13C(6)15N(4)(R)@18                                    | 0.0273465          | 2021.82544  | 1011.92    | 2021.79785 | 1011.90625 | 2          | 12 | 21.6708 | 7.09    |      |
| 11 | 52.74 | 54.75 | 70.6 HOXC10_FlexII   | 99.0 SAGMYMQSGSDFNCGVMR           | Oxidation(M)@4; Deamidated(Q)@7; Propionamide(C)@14; Label: 13C(6)15N(4)(R)@18                    | 0.0124152          | 2037.80542  | 1019.91    | 2037.79285 | 1019.90369 | 2          | 12 | 17.0923 | 7.09    |      |
| 11 | 52.74 | 54.75 | 70.6 HOXC10_FlexII   | 99.0 SDSQTPSPNEIKTEQSLAGPK        | Deamidated(N)@9; Label: 13C(6)15N(2)(K)@12; Label: 13C(6)15N(2)(K)@21                             | 0.0242176          | 2230.11792  | 744.3799   | 2230.09351 | 744.371826 | 3          | 16 | 15.7354 | 7.09    |      |
| 11 | 52.74 | 54.75 | 70.6 HOXC10_FlexII   | 99.0 SDSQTPSPNEIKTEQSLAGPK        | Deamidated(N)@9; Label: 13C(6)15N(2)(K)@12; Label: 13C(6)15N(2)(K)@21                             | 0.0242176          | 2230.11792  | 744.3799   | 2230.09351 | 744.371826 | 3          | 13 | 16.0141 | 7.09    |      |
| 11 | 52.74 | 54.75 | 70.6 HOXC10_FlexII   | 99.0 TPHCSGANDFEAPFEQR            | Propionamide(C)@4; Deamidated(N)@8; Label: 13C(6)15N(4)(R)@17                                     | 0.00711839         | 1986.8479   | 663.2899   | 1986.84058 | 663.287476 | 3          | 15 | 16.9359 | 7.09    |      |
| 11 | 52.74 | 54.75 | 70.6 HOXC10_FlexII   | 99.0 VSFPTPKSDSQTPSPNEIKTEQSLAGPK | Label: 13C(6)15N(2)(K)@8; Deamidated(Q)@12; Label: 13C(6)15N(2)(K)@20; Label: 13C(6)15N(2)(K)@29  | 0.00310563         | 3123.57056  | 781.8999   | 3123.56738 | 781.899109 | 4          | 13 | 16.462  | 7.09    |      |
| 11 | 52.74 | 54.75 | 70.6 HOXC10_FlexII   | 99.0 YPTFLYK                      | Label: 13C(6)15N(2)(K)@7                                                                          | cleaved T-Y@N-term | -0.00165037 | 938.497681 | 470.2561   | 938.499329 | 470.256928 | 2  | 9       | 18.0092 | 7.09 |
| 11 | 52.74 | 54.75 | 70.6 HOXC10_FlexII   | 99.0 YPTFLYK                      | Label: 13C(6)15N(2)(K)@7                                                                          | cleaved T-Y@N-term | 0.00020099  | 938.499451 | 470.257    | 938.499329 | 470.256928 | 2  | 9       | 17.9008 | 7.09 |
| 11 | 52.74 | 54.75 | 70.6 HOXC10_FlexII   | 99.0 YPTFLYK                      | Label: 13C(6)15N(2)(K)@7                                                                          | cleaved T-Y@N-term | -0.00091407 | 938.498474 | 470.2565   | 938.499329 | 470.256928 | 2  | 9       | 17.7612 | 7.09 |
| 12 | 51.78 | 53.79 | 72.4 CSNK1A1L_FlexII | 99.0 AQQQAASSSGGQQQAQTQTGK        | Label: 13C(6)15N(2)(K)@21                                                                         | -0.0133703         | 2039.95789  | 680.9932   | 2039.97119 | 680.997681 | 3          | 15 | 8.274   | 9.79    |      |
| 12 | 51.78 | 53.79 | 72.4 CSNK1A1L_FlexII | 99.0 AELVVGKK                     | Label: 13C(6)15N(2)(K)@8                                                                          | -0.00045676        | 779.462891  | 390.7387   | 779.463257 | 390.738892 | 2          | 9  | 15.1821 | 9.79    |      |
| 12 | 51.78 | 53.79 | 72.4 CSNK1A1L_FlexII | 99.0 DDMESLGYVFMFNR               | Label: 13C(6)15N(4)(R)@15                                                                         | -0.00625441        | 1895.80371  | 948.9091   | 1895.80081 | 948.91217  | 2          | 18 | 20.5345 | 9.79    |      |
| 12 | 51.78 | 53.79 | 72.4 CSNK1A1L_FlexII | 99.0 DIKPDNFLMGTR                 | Label: 13C(6)15N(2)(K)@3; Label: 13C(6)15N(4)(R)@13                                               | 0.00038035         | 1480.7467   | 741.3806   | 1480.74634 | 741.380432 | 2          | 15 | 17.7632 | 9.79    |      |
| 12 | 51.78 | 53.79 | 72.4 CSNK1A1L_FlexII | 99.0 EDKHLIGTVR                   | Label: 13C(6)15N(2)(K)@3; Label: 13C(6)15N(4)(R)@10                                               | 0.00041284         | 1184.66382  | 395.8952   | 1184.66321 | 395.89502  | 3          | 9  | 14.1391 | 9.79    |      |
| 12 | 51.78 | 53.79 | 72.4 CSNK1A1L_FlexII | 99.0 GFPAEFAMLYNYCR               | Propionamide(C)@13; Label: 13C(6)15N(4)(R)@14                                                     | -0.00053342        | 1761.78748  | 588.2698   | 1761.78821 | 588.27002  | 3          | 14 | 20.1592 | 9.79    |      |
| 12 | 51.78 | 53.79 | 72.4 CSNK1A1L_FlexII | 99.0 HCNKFLIDFGLAK                | Propionamide(C)@2; Label: 13C(6)15N(2)(K)@4; Label: 13C(6)15N(2)(K)@14                            | -0.00023698        | 1704.93543  | 569.3191   | 1704.93567 | 569.319153 | 3          | 14 | 18.9237 | 9.79    |      |
| 12 | 51.78 | 53.79 | 72.4 CSNK1A1L_FlexII | 99.0 HCNKFLIDFGLAKK               | Propionamide(C)@2; Label: 13C(6)15N(2)(K)@4; Label: 13C(6)15N(2)(K)@14; Label: 13C(6)15N(2)(K)@15 | 0.00107111         | 1841.04578  | 461.2687   | 1841.0448  | 461.268463 | 4          | 14 | 18.1673 | 9.79    |      |
| 12 | 51.78 | 53.79 | 72.4 CSNK1A1L_FlexII | 99.0 HUGTVR                       | Label: 13C(6)15N(4)(R)@10                                                                         | 4.60E-06           | 804.484497  | 403.2495   | 804.484558 | 403.249542 | 2          | 9  | 14.4682 | 9.79    |      |
| 12 | 51.78 | 53.79 | 72.4 CSNK1A1L_FlexII | 99.0 HPQLLYESK                    | Label: 13C(6)15N(2)(K)@9                                                                          | -2.58E-05          | 1121.59607  | 561.8053   | 1121.59607 | 561.805298 | 2          | 12 | 15.497  | 9.79    |      |
| 12 | 51.78 | 53.79 | 72.4 CSNK1A1L_FlexII | 99.0 IGSQSGFDVYLGITTTNGEEVAVK     | Deamidated(N)@17; Label: 13C(6)15N(2)(K)@24                                                       | 0.00319483         | 2422.20337  | 1212.109   | 2422.19946 | 1212.10706 | 2          | 21 | 19.0843 | 9.79    |      |
| 12 | 51.78 | 53.79 | 72.4 CSNK1A1L_FlexII | 99.0 KMSPTVEVLCK                  | Label: 13C(6)15N(2)(K)@1; Propionamide(C)@10; Label: 13C(6)15N(2)(K)@11                           | 0.00090719         | 1320.71265  | 441.2448   | 1320.71167 | 441.244476 | 3          | 11 | 16.4721 | 9.79    |      |
| 12 | 51.78 | 53.79 | 72.4 CSNK1A1L_FlexII | 99.0 LFLIDFGLAK                   | Label: 13C(6)15N(2)(K)@10                                                                         | 0.00641056         | 1143.68481  | 572.8497   | 1143.67835 | 572.846436 | 2          | 12 | 20.3494 | 9.79    |      |
| 12 | 51.78 | 53.79 | 72.4 CSNK1A1L_FlexII | 99.0 LFLIDFGLAKK                  | Label: 13C(6)15N(2)(K)@10; Label: 13C(6)15N(2)(K)@11                                              | -0.00287375        | 1279.78467  | 640.8996   | 1279.78467 | 640.901001 | 2          | 13 | 19.6233 | 9.79    |      |
| 12 | 51.78 | 53.79 | 72.4 CSNK1A1L_FlexII | 99.0 LYTIQQGVGIPHMHMYGQEK         | Label: 13C(6)15N(2)(K)@21                                                                         | 0.0146523          | 2434.24927  | 609.5696   | 2434.23462 | 609.565979 | 4          | 12 | 18.7918 | 9.79    |      |
| 12 | 51.78 | 53.79 | 72.4 CSNK1A1L_FlexII | 99.0 MSTPVEVLCK                   | Propionamide(C)@9; Label: 13C(6)15N(2)(K)@10                                                      | -0.00018728        | 1184.6023   | 593.3084   | 1184.60242 | 593.308533 | 2          | 12 | 17.2915 | 9.79    |      |
| 12 | 51.78 | 53.79 | 72.4 CSNK1A1L_FlexII | 99.0 NNVKDNYPTFLYK                | Label: 13C(6)15N(2)(K)@4; Label: 13C(6)15N(2)(K)@13                                               | 0.00576782         | 1630.8385   | 816.4265   | 1630.83264 | 816.423584 | 2          | 17 | 17.3595 | 9.79    |      |
| 12 | 51.78 | 53.79 | 72.4 CSNK1A1L_FlexII | 99.0 QHIPYREDK                    | Gln->pyro-Glu@N-term; Label: 13C(6)15N(4)(R)@6; Label: 13C(6)15N(2)(K)@9                          | -0.00064662        | 1185.58911  | 593.8018   | 1185.58972 | 593.802124 | 2          | 10 | 14.6379 | 9.79    |      |
| 12 | 51.78 | 53.79 | 72.4 CSNK1A1L_FlexII | 99.0 QKAQAASSSGGQQQAQTQTGK        | Label: 13C(6)15N(2)(K)@2; Deamidated(Q)@6; Label: 13C(6)15N(2)(K)@23                              | 0.0233498          | 2305.146    | 769.3893   | 2305.12305 | 769.381592 | 3          | 13 | 7.5877  | 9.79    |      |
| 12 | 51.78 | 53.79 | 72.4 CSNK1A1L_FlexII | 99.0 RDMESLGYVFMFNR               | Label: 13C(6)15N(4)(R)@1; Label: 13C(6)15N(4)(R)@16                                               | -0.012537          | 2061.90674  | 688.3095   | 2061.91919 | 688.31366  | 3          | 18 | 20.279  | 9.79    |      |
| 12 | 51.78 | 53.79 | 72.4 CSNK1A1L_FlexII | 99.0 TSLPVWQGLK                   | Label: 13C(6)15N(2)(K)@9                                                                          | -0.00035574        | 1036.57922  | 519.2969   | 1036.57971 | 519.297119 | 2          | 9  | 18.455  | 9.79    |      |
| 12 | 51.78 | 53.79 | 72.4 CSNK1A1L_FlexII | 99.0 TVLMLADOMISR                 | Label: 13C(6)15N(4)(R)@12                                                                         | -0.00240284        | 1386.72144  | 694.368    | 1386.72388 | 694.369202 | 2          | 15 | 19.284  | 9.79    |      |
| 12 | 51.78 | 53.79 | 72.4 CSNK1A1L_FlexII | 99.0 VKHPQLLYESK                  | Label: 13C(6)15N(2)(K)@2; Label: 13C(6)15N(2)(K)@11                                               | 0.0140986          | 1356.78784  | 453.2699   | 1356.77368 | 453.265167 | 3          | 12 | 15.0534 | 9.79    |      |
| 12 | 51.78 | 53.79 | 72.4 CSNK1A1L_FlexII | 99.0 YASINAHLGIEQSR               | Label: 13C(6)15N(4)(R)@14                                                                         | 0.00253209         | 1567.8009   | 784.9077   | 1567.79822 | 784.906372 | 2          | 20 | 16.6518 | 9.79    |      |
| 12 | 51.78 | 53.79 | 72.4 CSNK1A1L_FlexII | 99.0 AQQQAASSSGGQQQAQTQTGK        | Label: 13C(6)15N(2)(K)@21                                                                         | 0.0003626          | 2039.97156  | 680.9978   | 2039.97119 | 680.997681 | 3          | 15 | 7.7384  | 9.79    |      |
| 12 | 51.78 | 53.79 | 72.4 CSNK1A1L_FlexII | 99.0 AQQQAASSSGGQQQAQTQTGK        | Deamidated(Q)@4; Label: 13C(6)15N(2)(K)@21                                                        | 0.00813337         | 2040.9635   | 1021.489   | 2040.9552  | 1021.48486 | 2          | 17 | 7.7538  | 9.79    |      |
| 12 | 51.78 | 53.79 | 72.4 CSNK1A1L_FlexII | 99.0 AQQQAASSSGGQQQAQTQTGK        | Label: 13C(6)15N(2)(K)@21                                                                         | 0.00548955         | 2039.97669  | 680.9995   | 2039.97119 | 680.997681 | 3          | 22 | 8.0133  | 9.79    |      |
| 12 | 51.78 | 53.79 | 72.4 CSNK1A1L_FlexII | 99.0 AQQQAASSSGGQQQAQTQTGK        | Label: 13C(6)15N(2)(K)@21                                                                         | -0.00076937        | 2039.96948  | 1020.992   | 2039.97119 | 1020.99286 | 2          | 25 | 8.0215  | 9.79    |      |
| 12 | 51.78 | 53.79 | 72.4 CSNK1A1L_FlexII | 99.0 AQQQAASSSGGQQQAQTQTGK        | Deamidated(Q)@14; Label: 13C(6)15N(2)(K)@21                                                       | 0.00126975         | 2040.95654  | 681.3261   | 2040.9552  | 681.325684 | 3          | 17 | 8.5363  | 9.79    |      |
| 12 | 51.78 | 53.79 | 72.4 CSNK1A1L_FlexII | 99.0 AQQQAASSSGGQQQAQTQTGK        | Deamidated(Q)@14; Label: 13C(6)15N(2)(K)@21                                                       | 0.00813337         | 2040.9635   | 1021.489   | 2040.9552  | 1021.48486 | 2          | 17 | 8.5647  | 9.79    |      |
| 12 | 51.78 | 53.79 | 72.4 CSNK1A1L_FlexII | 99.0 AQQQAASSSGGQQQAQTQTGK        | Deamidated(Q)@16; Label: 13C(6)15N(2)(K)@21                                                       | -0.0118861         | 2040.94348  | 1021.479   | 2040.9552  | 1021.48486 | 2          | 19 | 8.8285  | 9.79    |      |
| 12 | 51.78 | 53.79 | 72.4 CSNK1A1L_FlexII | 99.0 AELVVGKK                     | Label: 13C(6)15N(2)(K)@8                                                                          | 0.00210671         | 779.465454  | 390.74     | 779.463257 | 390.738892 | 2          | 9  | 14.9165 | 9.79    |      |
| 12 | 51.78 | 53.79 | 72.4 CSNK1A1L_FlexII | 99.0 AELVVGKK                     |                                                                                                   | -0.00363986        | 771.445496  | 386.73     | 771.449036 | 386.731812 | 2          | 9  | 14.9858 | 9.79    |      |
| 12 | 51.78 | 53.79 | 72.4 CSNK1A1L_FlexII | 99.0 DIKPDNFLMGTR                 | Label: 13C(6)15N(2)(K)@3; Label: 13C(6)15N(4)(R)@13                                               | -0.00132863        | 1480.74512  | 741.3798   | 1480.74634 | 741.380432 | 2          | 13 | 18.0358 | 9.79    |      |
| 12 | 51.78 | 53.79 | 72.4 CSNK1A1L_FlexII | 99.0 DIKPDNFLMGTR                 | Label: 13C(6)15N(2)(K)@3; Label: 13C(6)15N(4)(R)@13                                               | 0.00123766         | 1480.74756  | 494.5898   | 1480.74634 | 494.589386 | 3          | 12 | 17.7644 | 9.79    |      |
| 12 | 51.78 | 53.79 | 72.4 CSNK1A1L_FlexII | 99.0 DIKPDNFLMGTR                 | Label: 13C(6)15N(2)(K)@3; Label: 13C(6)15N(4)(R)@13                                               | 0.00123766         | 1480.74756  | 494.5898   | 1480.74634 | 494.589386 | 3          | 12 | 18.0337 | 9.79    |      |
| 12 | 51.78 | 53.79 | 72.4 CSNK1A1L_FlexII | 99.0 GFPAEFAMLYNYCR               | Deamidated(N)@11; Propionamide(C)@13; Label: 13C(6)15N(4)(R)@14                                   | 0.0115708          | 1762.78381  | 882.3992   | 1762.77222 | 882.393433 | 2          | 11 | 20.0635 | 9.79    |      |
| 12 | 51.78 | 53.79 | 72.4 CSNK1A1L_FlexII | 99.0 HCNKFLIDFGLAKK               | Propionamide(C)@2; Label: 13C(6)15N(2)(K)@4; Label: 13C(6)15N(2)(K)@14; Label: 13C(6)15N(2)(K)@15 | 0.00219744         | 1841.04688  | 614.6896   | 1841.0448  | 614.688904 | 3          | 16 | 18.2474 | 9.79    |      |
| 12 | 51.78 | 53.79 | 72.4 CSNK1A1L_FlexII | 99.0 HUGTVR                       | Label: 13C(6)15N(4)(R)@7                                                                          | -0.0001785         | 804.484497  | 403.2495   | 804.484558 | 403.249542 | 2          | 9  | 14.1974 | 9.79    |      |
| 12 | 51.78 | 53.79 | 72.4 CSNK1A1L_FlexII | 99.0 HUGTVR                       |                                                                                                   | 0.00047716         | 794.476685  | 398.2456   | 794.476257 | 398.245422 | 2          | 8  | 14.2888 | 9.79    |      |
| 12 | 51.78 | 53.79 | 72.4 CSNK1A1L_FlexII | 99.0 LFLIDFGLAK                   | Label: 13C(6)15N(2)(K)@10                                                                         | -0.00018123        | 1143.67822  | 572.8464   | 1143.67835 | 572.846436 | 2          | 11 | 20.6061 | 9.79    |      |
| 12 | 51.78 | 53.79 | 72.4 CSNK1A1L_FlexII | 99.0 LFLIDFGLAK                   | Label: 13C(6)15N(2)(K)@10                                                                         | 0.00198852         | 1143.6803   | 572.8474   | 1143.67835 | 572.846436 | 2          | 11 | 20.4755 | 9.79    |      |
| 12 | 51.78 | 53.79 | 72.4 CSNK1A1L_FlexII | 99.0 LFLIDFGLAK                   | Label: 13C(6)15N(2)(K)@10                                                                         | 0.00641056         | 1143.68481  | 572.8497   | 1143.67835 | 572.846436 | 2          | 9  | 20.8791 | 9.79    |      |
| 12 | 51.78 | 53.79 | 72.4 CSNK1A1L_FlexII | 99.0 LFLIDFGLAKK                  | Label: 13C(6)15N(2)(K)@10; Label: 13C(6)15N(2)(K)@11                                              | -0.00326766        | 1279.78418  | 427.602    | 1279.78748 | 427.603119 | 3          | 12 | 19.592  | 9.79    |      |
| 12 | 51.78 | 53.79 | 72.4 CSNK1A1L_FlexII | 99.0 LFLIDF                       |                                                                                                   |                    |             |            |            |            |            |    |         |         |      |

|    |       |       |                       |                                               |                                                                                                            |                                 |             |            |          |            |            |   |    |         |       |
|----|-------|-------|-----------------------|-----------------------------------------------|------------------------------------------------------------------------------------------------------------|---------------------------------|-------------|------------|----------|------------|------------|---|----|---------|-------|
| 12 | 51.78 | 53.79 | 72.4 CSNK1A1L_FlexIII | 99.0 YPTFLYK                                  | Label: 13C(6)15N(2)(K) @ 7                                                                                 | cleaved N-Y@N-term              | -0.00091407 | 938.498474 | 470.2565 | 938.499329 | 470.256928 | 2 | 9  | 17.7612 | 9.79  |
| 13 | 50.86 | 52.87 | 65.6 IL16_FlexIII     | 99.0 DSIYVGIGIYVK                             | Label: 13C(6)15N(2)(K) @ 12                                                                                |                                 | -0.00048112 | 1331.72131 | 666.8679 | 1331.72168 | 666.868103 | 2 | 11 | 19.1865 | 13.95 |
| 13 | 50.86 | 52.87 | 65.6 IL16_FlexIII     | 99.0 DSSSFALSPASPISTAKPNYR                    | Label: 13C(6)15N(2)(K) @ 18; Deamidated(N) @ 20; Label: 13C(6)15N(4)(R) @ 22                               |                                 | 0.0121971   | 2343.14746 | 1172.581 | 2343.13501 | 1172.57471 | 2 | 12 | 17.3345 | 13.95 |
| 13 | 50.86 | 52.87 | 65.6 IL16_FlexIII     | 99.0 EAGVGLGIGLCSVPYFQCISGIFVHTLSPGSAVHLDGR   | Label: 13C(6)15N(2)(K) @ 11; Deamidated(Q) @ 17; Propionamide(C) @ 18; Label: 13C(6)15N(4)(R) @ 38         |                                 | 0.00267091  | 4009.01489 | 1003.261 | 4009.0105  | 1003.25989 | 4 | 19 | 20.46   | 13.95 |
| 13 | 50.86 | 52.87 | 65.6 IL16_FlexIII     | 99.0 EGIFHSSVOLADTSEAGPSSVPDLALASEAAQLQAAGNDR | Deamidated(Q) @ 34; Label: 13C(6)15N(4)(R) @ 40                                                            |                                 | -0.0006594  | 4019.92114 | 1340.981 | 4019.92236 | 1340.98145 | 3 | 32 | 19.5396 | 13.95 |
| 13 | 50.86 | 52.87 | 65.6 IL16_FlexIII     | 99.0 EKPGLKEAQSSNFLFPK                        | Label: 13C(6)15N(2)(K) @ 2; Label: 13C(6)15N(2)(K) @ 5; Label: 13C(6)15N(2)(K) @ 17                        | missed K-L @ 5                  | -0.0113263  | 1943.04651 | 972.5305 | 1943.05786 | 972.536194 | 2 | 18 | 17.2467 | 13.95 |
| 13 | 50.86 | 52.87 | 65.6 IL16_FlexIII     | 99.0 GLGFSIVGGKDSIYGPIGIYVK                   | Label: 13C(6)15N(2)(K) @ 10; Label: 13C(6)15N(2)(K) @ 22                                                   | missed K-D @ 10                 | 0.00485487  | 2255.2583  | 752.7601 | 2255.25366 | 752.758484 | 3 | 16 | 19.6477 | 13.95 |
| 13 | 50.86 | 52.87 | 65.6 IL16_FlexIII     | 99.0 HPDPQKEEMEAQEVK                          | Label: 13C(6)15N(2)(K) @ 6; Label: 13C(6)15N(2)(K) @ 15                                                    | missed K-E @ 6                  | -0.00760002 | 1809.84631 | 905.9304 | 1809.85376 | 905.934204 | 2 | 22 | 14.5331 | 13.95 |
| 13 | 50.86 | 52.87 | 65.6 IL16_FlexIII     | 99.0 HPDPQKEEMEAQEVKYPTFLYK                   | Label: 13C(6)15N(2)(K) @ 6; Deamidated(Q) @ 12; Label: 13C(6)15N(2)(K) @ 15; Label: 13C(6)15N(2)(K) @ 22   | missed K-E @ 6; missed K-Y @ 15 | 0.00284016  | 2731.32935 | 911.4504 | 2731.32666 | 911.448463 | 3 | 14 | 17.2703 | 13.95 |
| 13 | 50.86 | 52.87 | 65.6 IL16_FlexIII     | 99.0 IMVEVSLQK                                | Label: 13C(6)15N(2)(K) @ 9                                                                                 |                                 | -0.00112812 | 1053.59729 | 527.8059 | 1053.59839 | 527.806458 | 2 | 11 | 17.1815 | 13.95 |
| 13 | 50.86 | 52.87 | 65.6 IL16_FlexIII     | 99.0 KGLLTITVR                                | Label: 13C(6)15N(2)(K) @ 1; Label: 13C(6)15N(4)(R) @ 9                                                     | missed K-G @ 1                  | -0.00179643 | 1017.66467 | 509.8396 | 1017.66665 | 509.840546 | 2 | 12 | 17.2238 | 13.95 |
| 13 | 50.86 | 52.87 | 65.6 IL16_FlexIII     | 99.0 KLSQQLDCPAGK                             | Label: 13C(6)15N(2)(K) @ 1; Propionamide(C) @ 9; Label: 13C(6)15N(2)(K) @ 13                               | missed K-S @ 1                  | -0.00179096 | 1460.76099 | 487.9276 | 1460.76282 | 487.928223 | 3 | 14 | 15.0187 | 13.95 |
| 13 | 50.86 | 52.87 | 65.6 IL16_FlexIII     | 99.0 LEAQSSNFLFPK                             | Label: 13C(6)15N(2)(K) @ 12                                                                                |                                 | -0.00143902 | 1387.72131 | 694.8679 | 1387.72266 | 694.868652 | 2 | 14 | 18.3314 | 13.95 |
| 13 | 50.86 | 52.87 | 65.6 IL16_FlexIII     | 99.0 LOEGDEILNGLSMAGLTHQDALQK                 | Label: 13C(6)15N(2)(K) @ 26                                                                                |                                 | -0.00282279 | 2846.38208 | 949.8013 | 2846.38477 | 949.802185 | 3 | 20 | 18.7453 | 13.95 |
| 13 | 50.86 | 52.87 | 65.6 IL16_FlexIII     | 99.0 LTAPPSCLSHLSPPLCR                        | Propionamide(C) @ 8; Propionamide(C) @ 16; Label: 13C(6)15N(4)(R) @ 17                                     |                                 | -0.00154424 | 1942.99805 | 648.6733 | 1942.99963 | 648.673828 | 3 | 14 | 17.7827 | 13.95 |
| 13 | 50.86 | 52.87 | 65.6 IL16_FlexIII     | 99.0 SAAPTDRQPYSLCSNR                         | Label: 13C(6)15N(4)(R) @ 7; Propionamide(C) @ 13; Label: 13C(6)15N(4)(R) @ 16                              | missed R-Q @ 7                  | -0.00866575 | 1855.86633 | 928.9404 | 1855.875   | 928.944763 | 2 | 16 | 15.2263 | 13.95 |
| 13 | 50.86 | 52.87 | 65.6 IL16_FlexIII     | 99.0 SAAPTDRQPYSLCSNRK                        | Label: 13C(6)15N(4)(R) @ 7; Propionamide(C) @ 13; Label: 13C(6)15N(4)(R) @ 16; Label: 13C(6)15N(2)(K) @ 17 | missed R-Q @ 7; missed R-K @ 16 | -0.00615769 | 1991.97778 | 664.9999 | 1991.98413 | 665.002014 | 3 | 12 | 14.5419 | 13.95 |
| 13 | 50.86 | 52.87 | 65.6 IL16_FlexIII     | 99.0 SLSQQLDCPAGK                             | Propionamide(C) @ 8; Label: 13C(6)15N(2)(K) @ 12                                                           |                                 | -0.00097259 | 1324.65271 | 663.3336 | 1324.65369 | 663.334106 | 2 | 14 | 15.5571 | 13.95 |
| 13 | 50.86 | 52.87 | 65.6 IL16_FlexIII     | 99.0 SLSTAQLVQPSGGLQASVISNIVLMK               | Label: 13C(6)15N(2)(K) @ 26                                                                                |                                 | 0.0015382   | 2648.46729 | 1325.241 | 2648.46631 | 1325.24036 | 2 | 17 | 20.5601 | 13.95 |
| 13 | 50.86 | 52.87 | 65.6 IL16_FlexIII     | 99.0 SNSTSVPNYCTR                             | Propionamide(C) @ 10; Label: 13C(6)15N(4)(R) @ 12                                                          |                                 | -0.0025564  | 1408.62549 | 705.32   | 1408.62805 | 705.321289 | 2 | 14 | 14.9905 | 13.95 |
| 13 | 50.86 | 52.87 | 65.6 IL16_FlexIII     | 99.0 TIFAGGAAAADGR                            |                                                                                                            |                                 | -0.00371843 | 1176.58508 | 589.2998 | 1176.58875 | 589.301636 | 2 | 14 | 16.0373 | 13.95 |
| 13 | 50.86 | 52.87 | 65.6 IL16_FlexIII     | 99.0 TRLTAPPSCLSHLSPPLCR                      | Label: 13C(6)15N(4)(R) @ 2; Propionamide(C) @ 10; Propionamide(C) @ 18; Label: 13C(6)15N(4)(R) @ 19        | missed R-L @ 2                  | 0.0130659   | 2210.16988 | 553.5497 | 2210.15674 | 553.546448 | 4 | 13 | 17.2855 | 13.95 |
| 13 | 50.86 | 52.87 | 65.6 IL16_FlexIII     | 99.0 TSDGSSPDEKYPDFEISLAQGK                   | Label: 13C(6)15N(2)(K) @ 11; Label: 13C(6)15N(2)(K) @ 24                                                   | missed K-Y @ 11                 | -0.00527745 | 2598.18921 | 867.0703 | 2598.19434 | 867.072083 | 3 | 16 | 18.2406 | 13.95 |
| 13 | 50.86 | 52.87 | 65.6 IL16_FlexIII     | 99.0 QPYSLCSNRK                               | Gln->pyro-Glu @ N-term; Propionamide(C) @ 6; Label: 13C(6)15N(4)(R) @ 9; Label: 13C(6)15N(2)(K) @ 10       | missed R-K @ 9                  | 0.00466891  | 1266.61926 | 634.3169 | 1266.61462 | 634.314575 | 2 | 10 | 15.8585 | 13.95 |
| 13 | 50.86 | 52.87 | 65.6 IL16_FlexIII     | 99.0 DSIYVGIGIYVK                             | Label: 13C(6)15N(2)(K) @ 12                                                                                |                                 | 0.00366928  | 1331.72522 | 666.8699 | 1331.72168 | 666.868103 | 2 | 11 | 18.9106 | 13.95 |
| 13 | 50.86 | 52.87 | 65.6 IL16_FlexIII     | 99.0 EAGVGLGIGLCSVPYFQCISGIFVHTLSPGSAVHLDGR   | Propionamide(C) @ 11; Deamidated(Q) @ 17; Propionamide(C) @ 18; Label: 13C(6)15N(4)(R) @ 38                |                                 | 0.0511676   | 4009.06104 | 1337.361 | 4009.0105  | 1337.34412 | 3 | 20 | 20.5151 | 13.95 |
| 13 | 50.86 | 52.87 | 65.6 IL16_FlexIII     | 99.0 EGIFHSSVOLADTSEAGPSSVPDLALASEAAQLQAAGNDR | Deamidated(Q) @ 34; Label: 13C(6)15N(4)(R) @ 40                                                            |                                 | 0.02937     | 4019.95117 | 1340.991 | 4019.92236 | 1340.98145 | 3 | 27 | 19.9824 | 13.95 |
| 13 | 50.86 | 52.87 | 65.6 IL16_FlexIII     | 99.0 EGIFHSSVOLADTSEAGPSSVPDLALASEAAQLQAAGNDR | Deamidated(Q) @ 34; Label: 13C(6)15N(4)(R) @ 40                                                            |                                 | 0.0107805   | 4019.93506 | 1005.991 | 4019.92236 | 1005.98785 | 4 | 20 | 26.643  | 13.95 |
| 13 | 50.86 | 52.87 | 65.6 IL16_FlexIII     | 99.0 EGIFHSSVOLADTSEAGPSSVPDLALASEAAQLQAAGNDR | Deamidated(Q) @ 32; Label: 13C(6)15N(4)(R) @ 40                                                            |                                 | 0.02937     | 4019.95117 | 1340.991 | 4019.92236 | 1340.98145 | 3 | 22 | 26.7088 | 13.95 |
| 13 | 50.86 | 52.87 | 65.6 IL16_FlexIII     | 99.0 EKPGLKEAQSSNFLFPK                        | Label: 13C(6)15N(2)(K) @ 2; Label: 13C(6)15N(2)(K) @ 5; Label: 13C(6)15N(2)(K) @ 17                        | missed K-L @ 5                  | -0.00995721 | 1943.04785 | 648.6899 | 1943.05786 | 648.693237 | 3 | 12 | 17.1637 | 13.95 |
| 13 | 50.86 | 52.87 | 65.6 IL16_FlexIII     | 99.0 HPDPQKEEMEAQEVK                          | Label: 13C(6)15N(2)(K) @ 6; Label: 13C(6)15N(2)(K) @ 15                                                    | missed K-E @ 6                  | -0.00623094 | 1809.84753 | 604.2898 | 1809.85376 | 604.29187  | 3 | 16 | 14.2405 | 13.95 |
| 13 | 50.86 | 52.87 | 65.6 IL16_FlexIII     | 99.0 HPDPQKEEMEAQEVK                          | Label: 13C(6)15N(2)(K) @ 6; Label: 13C(6)15N(2)(K) @ 15                                                    | missed K-E @ 6                  | 0.0124195   | 1809.86633 | 905.9404 | 1809.85376 | 905.934204 | 2 | 21 | 14.2729 | 13.95 |
| 13 | 50.86 | 52.87 | 65.6 IL16_FlexIII     | 99.0 HPDPQKEEMEAQEVK                          | Label: 13C(6)15N(2)(K) @ 6; Label: 13C(6)15N(2)(K) @ 15                                                    | missed K-E @ 6                  | -0.00073776 | 1809.85303 | 604.2916 | 1809.85376 | 604.29187  | 3 | 14 | 14.5108 | 13.95 |
| 13 | 50.86 | 52.87 | 65.6 IL16_FlexIII     | 99.0 HPDPQKEEMEAQEVK                          | Label: 13C(6)15N(2)(K) @ 6; Label: 13C(6)15N(2)(K) @ 15                                                    | missed K-E @ 6                  | -0.00119974 | 1809.85254 | 453.4704 | 1809.85376 | 453.470734 | 4 | 13 | 14.2943 | 13.95 |
| 13 | 50.86 | 52.87 | 65.6 IL16_FlexIII     | 99.0 HPDPQKEEMEAQEVK                          | Label: 13C(6)15N(2)(K) @ 6; Oxidation(M) @ 9; Label: 13C(6)15N(2)(K) @ 15                                  | missed K-E @ 6                  | -0.0110644  | 1825.83765 | 609.6198 | 1825.84876 | 609.62535  | 3 | 12 | 14.0562 | 13.95 |
| 13 | 50.86 | 52.87 | 65.6 IL16_FlexIII     | 99.0 IMVEVSLQK                                | Label: 13C(6)15N(2)(K) @ 9                                                                                 |                                 | -0.00015156 | 1053.59827 | 527.8064 | 1053.59839 | 527.806458 | 2 | 10 | 17.4524 | 13.95 |
| 13 | 50.86 | 52.87 | 65.6 IL16_FlexIII     | 99.0 KGLLTITVR                                | Label: 13C(6)15N(2)(K) @ 1; Label: 13C(6)15N(4)(R) @ 9                                                     | missed K-G @ 1                  | -0.00280772 | 1017.66364 | 340.2285 | 1017.6665  | 340.229462 | 3 | 9  | 17.2335 | 13.95 |
| 13 | 50.86 | 52.87 | 65.6 IL16_FlexIII     | 99.0 KLSQQLDCPAGK                             | Label: 13C(6)15N(2)(K) @ 9; Label: 13C(6)15N(2)(K) @ 13                                                    | missed K-S @ 1                  | 0.00279089  | 1460.76563 | 731.3901 | 1460.76282 | 731.386672 | 2 | 22 | 15.0226 | 13.95 |
| 13 | 50.86 | 52.87 | 65.6 IL16_FlexIII     | 99.0 LTAPPSCLSHLSPPLCR                        | Propionamide(C) @ 8; Propionamide(C) @ 16; Label: 13C(6)15N(4)(R) @ 17                                     |                                 | 0.00685232  | 1943.00647 | 972.5105 | 1942.99963 | 972.50708  | 2 | 20 | 17.5362 | 13.95 |
| 13 | 50.86 | 52.87 | 65.6 IL16_FlexIII     | 99.0 LTAPPSCLSHLSPPLCR                        | Propionamide(C) @ 8; Propionamide(C) @ 16; Label: 13C(6)15N(4)(R) @ 17                                     |                                 | -0.00282598 | 1942.99695 | 648.6729 | 1942.99963 | 648.673828 | 3 | 12 | 17.501  | 13.95 |
| 13 | 50.86 | 52.87 | 65.6 IL16_FlexIII     | 99.0 LTAPPSCLSHLSPPLCR                        | Propionamide(C) @ 8; Propionamide(C) @ 16; Label: 13C(6)15N(4)(R) @ 17                                     |                                 | 0.00685232  | 1943.00647 | 972.5105 | 1942.99963 | 972.50708  | 2 | 12 | 17.808  | 13.95 |
| 13 | 50.86 | 52.87 | 65.6 IL16_FlexIII     | 99.0 LTAPPSCLSHLSPPLCR                        | Propionamide(C) @ 8; Propionamide(C) @ 16                                                                  |                                 | 0.00658387  | 1932.99793 | 645.3399 | 1932.99191 | 645.337708 | 3 | 11 | 17.5774 | 13.95 |
| 13 | 50.86 | 52.87 | 65.6 IL16_FlexIII     | 99.0 SLSQQLDCPAGK                             | Propionamide(C) @ 8; Label: 13C(6)15N(2)(K) @ 12                                                           |                                 | -0.00072845 | 1324.65283 | 663.3337 | 1324.65369 | 663.334106 | 2 | 12 | 15.827  | 13.95 |
| 13 | 50.86 | 52.87 | 65.6 IL16_FlexIII     | 99.0 SLSQQLDCPAGK                             | Propionamide(C) @ 8; Label: 13C(6)15N(2)(K) @ 12                                                           |                                 | 0.0117227   | 1324.66553 | 663.34   | 1324.65369 | 663.334106 | 2 | 11 | 16.1014 | 13.95 |
| 13 | 50.86 | 52.87 | 65.6 IL16_FlexIII     | 99.0 SLSTAQLVQPSGGLQASVISNIVLMK               | Deamidated(Q) @ 9; Label: 13C(6)15N(2)(K) @ 26                                                             |                                 | 0.0175245   | 2649.46729 | 1325.741 | 2649.4502  | 1325.73242 | 2 | 17 | 20.2811 | 13.95 |
| 13 | 50.86 | 52.87 | 65.6 IL16_FlexIII     | 99.0 SLSTAQLVQPSGGLQASVISNIVLMK               | Label: 13C(6)15N(2)(K) @ 26                                                                                |                                 | 0.00302936  | 2648.46924 | 883.8304 | 2648.46631 | 883.829346 | 3 | 20 | 20.2878 | 13.95 |
| 13 | 50.86 | 52.87 | 65.6 IL16_FlexIII     | 99.0 SLSTAQLVQPSGGLQASVISNIVLMK               | Deamidated(Q) @ 15; Label: 13C(6)15N(2)(K) @ 26                                                            |                                 | 0.0088838   | 2649.45898 | 884.1603 | 2649.4502  | 884.157349 | 3 | 14 | 26.5509 | 13.95 |
| 13 | 50.86 | 52.87 | 65.6 IL16_FlexIII     | 99.0 SLSTAQLVQPSGGLQASVISNIVLMK               | Deamidated(Q) @ 15; Label: 13C(6)15N(2)(K) @ 26                                                            |                                 | 0.0088838   | 2649.45898 | 884.1603 | 2649.4502  | 884.157349 | 3 | 10 | 21.0879 | 13.95 |
| 13 | 50.86 | 52.87 | 65.6 IL16_FlexIII     | 99.0 SNSTSVPNYCTR                             | Propionamide(C) @ 10; Label: 13C(6)15N(4)(R) @ 12                                                          |                                 | -0.0025564  | 1408.62549 | 705.32   | 1408.62805 | 705.321289 | 2 | 15 | 14.7156 | 13.95 |
| 13 | 50.86 | 52.87 | 65.6 IL16_FlexIII     | 99.0 TIFAGGAAAADGR                            | Label: 13C(6)15N(4)(R) @ 13                                                                                |                                 | -0.00073811 | 1186.59631 | 594.3054 | 1186.59705 | 594.305786 | 2 | 14 | 15.9701 | 13.95 |
| 13 | 50.86 | 52.87 | 65.6 IL16_FlexIII     | 99.0 TIFAGGAAAADGR                            | Label: 13C(6)15N(4)(R) @ 13                                                                                |                                 | -0.00110433 | 1186.59583 | 594.3052 | 1186.59705 | 594.305786 | 2 | 15 | 16.2345 | 13.95 |
| 13 | 50.86 | 52.87 | 65.6 IL16_FlexIII     | 99.0 TIFAGGAAAADGR                            | Label: 13C(6)15N(4)(R) @ 13                                                                                |                                 | -0.0033016  | 1186.59363 | 594.3041 | 1186.59705 | 594.305786 | 2 | 10 | 26.5772 | 13.95 |
| 13 | 50.86 | 52.87 | 65.6 IL16_FlexIII     | 99.0 YPTFLYK                                  | Label: 13C(6)15N(2)(K) @ 7                                                                                 |                                 | -0.00165037 | 938.497681 | 470.2561 | 938.499329 | 470.256928 | 2 | 9  | 18.0092 | 13.95 |
| 13 | 50.86 | 52.87 | 65.6 IL16_FlexIII     | 99.0 YPTFLYK                                  | Label: 13C(6)15N(2)(K) @ 7                                                                                 |                                 | 0.00020099  | 938.499451 | 470.257  | 938.499329 | 470.256928 | 2 | 9  | 17.9008 | 13.95 |
| 13 | 50.86 | 52.87 | 65.6 IL16_FlexIII     | 99.0 YPTFLYK                                  | Label: 13C(6)15N(2)(K) @ 7                                                                                 |                                 | -0.00091407 | 938.498474 | 470.2565 | 938.499329 | 470.256928 | 2 | 9  | 17.7612 | 13.95 |
| 14 | 50.19 | 52.2  | 65.0 HIF1AN_FlexIII   | 99.0 AEELIENEEPVLDTNLVYPALK                   | Label: 13C(6)15N(2)(K) @ 24                                                                                |                                 | 0.00328875  | 2706.41284 | 903.1449 | 2706.40942 |            |   |    |         |       |

|    |       |      |      |                |      |                                    |                                                                                                                                |                              |             |            |          |            |            |   |    |         |       |
|----|-------|------|------|----------------|------|------------------------------------|--------------------------------------------------------------------------------------------------------------------------------|------------------------------|-------------|------------|----------|------------|------------|---|----|---------|-------|
| 14 | 50.19 | 52.2 | 65.0 | HIF1AN_Flexiil | 99.0 | LYLOQTLNDTVGRK                     | Label: 13C(6)15N(4)(R)@13; Label: 13C(6)15N(2)(K)@14                                                                           | missed R-K@13                | -0.0100832  | 1665.90686 | 556.3096 | 1665.91687 | 556.312927 | 3 | 13 | 17.3305 | 25.53 |
| 14 | 50.19 | 52.2 | 65.0 | HIF1AN_Flexiil | 99.0 | MANFQNFKPR                         | Label: 13C(6)15N(2)(K)@8; Label: 13C(6)15N(4)(R)@10                                                                            |                              | -0.00073742 | 1269.64002 | 635.8273 | 1269.64075 | 635.827637 | 2 | 12 | 16.3424 | 25.53 |
| 14 | 50.19 | 52.2 | 65.0 | HIF1AN_Flexiil | 99.0 | MLGEALGNPOEVGPLLNTMIK              | Label: 13C(6)15N(2)(K)@21                                                                                                      |                              | -0.00254906 | 2232.17139 | 1117.093 | 2232.17383 | 1117.09412 | 2 | 25 | 20.1969 | 25.53 |
| 14 | 50.19 | 52.2 | 65.0 | HIF1AN_Flexiil | 99.0 | QSQVDFDNPDYER                      | Label: 13C(6)15N(4)(R)@13                                                                                                      |                              | -0.00372805 | 1621.68469 | 811.8496 | 1621.68835 | 811.851502 | 2 | 15 | 16.1422 | 25.53 |
| 14 | 50.19 | 52.2 | 65.0 | HIF1AN_Flexiil | 99.0 | RGWGQLTSNLLLGMEGNVPYAHYDEQONFFAQIK | Label: 13C(6)15N(4)(R)@1; Oxidation(M)@15; Deamidated(N)@18; Label: 13C(6)15N(2)(K)@35                                         | missed R-G@1                 | -0.00544961 | 4009.97095 | 1003.5   | 4009.9751  | 1003.50104 | 4 | 17 | 19.8527 | 25.53 |
| 14 | 50.19 | 52.2 | 65.0 | HIF1AN_Flexiil | 99.0 | RIEYPLK                            | Label: 13C(6)15N(4)(R)@1; Label: 13C(6)15N(2)(K)@7                                                                             | missed R-I@1                 | -0.00106659 | 935.554871 | 468.7847 | 935.555908 | 468.785248 | 2 | 9  | 15.4298 | 25.53 |
| 14 | 50.19 | 52.2 | 65.0 | HIF1AN_Flexiil | 99.0 | RIEYPLKAHQK                        | Label: 13C(6)15N(4)(R)@1; Label: 13C(6)15N(2)(K)@7; Label: 13C(6)15N(2)(K)@11                                                  | missed R-I@1; missed K-A@7   | -0.00113637 | 1407.81848 | 470.2801 | 1407.8197  | 470.280518 | 3 | 14 | 13.8459 | 25.53 |
| 14 | 50.19 | 52.2 | 65.0 | HIF1AN_Flexiil | 99.0 | SNREEMKFHEFVEK                     | Label: 13C(6)15N(4)(R)@3; Label: 13C(6)15N(2)(K)@7; Label: 13C(6)15N(2)(K)@14                                                  | missed R-E@3; missed K-F@7   | -0.00341776 | 1834.88489 | 918.4497 | 1834.88818 | 918.451416 | 2 | 20 | 15.6418 | 25.53 |
| 14 | 50.19 | 52.2 | 65.0 | HIF1AN_Flexiil | 99.0 | WDLEYLQENIGNGDFSYSASTHK            | Deamidated(N)@12; Label: 13C(6)15N(2)(K)@24                                                                                    |                              | 0.0121726   | 2781.2771  | 928.0997 | 2781.26489 | 928.095581 | 3 | 18 | 26.5507 | 25.53 |
| 14 | 50.19 | 52.2 | 65.0 | HIF1AN_Flexiil | 99.0 | RCILFPDQFECLYPYVHHPCDR             | Label: 13C(6)15N(4)(R)@1; Propionamide(C)@2; Deamidated(Q)@9; Propionamide(C)@12; Propionamide(C)@22; Label: 13C(6)15N(2)(K)@1 | missed R-C@1                 | 0.0164089   | 3178.48926 | 795.6296 | 3178.47315 | 795.625549 | 4 | 13 | 18.5771 | 25.53 |
| 14 | 50.19 | 52.2 | 65.0 | HIF1AN_Flexiil | 99.0 | AEEELIENEPEPVLTDNLVYPALK           | Deamidated(N)@7; Label: 13C(6)15N(2)(K)@24                                                                                     |                              | 0.0115103   | 2707.40527 | 1354.71  | 2707.39356 | 1354.70398 | 2 | 21 | 19.5787 | 25.53 |
| 14 | 50.19 | 52.2 | 65.0 | HIF1AN_Flexiil | 99.0 | AEEELIENEPEPVLTDNLVYPALK           | Label: 13C(6)15N(2)(K)@24                                                                                                      |                              | 0.00529116  | 2706.41528 | 1354.215 | 2706.40942 | 1354.21204 | 2 | 22 | 19.8417 | 25.53 |
| 14 | 50.19 | 52.2 | 65.0 | HIF1AN_Flexiil | 99.0 | CILFPDQFECLYPYVHHPCDR              | Propionamide(C)@1; Deamidated(Q)@8; Propionamide(C)@11; Propionamide(C)@21; Label: 13C(6)15N(4)(R)@23                          |                              | 0.00561385  | 3012.36939 | 754.0996 | 3012.36353 | 754.098206 | 4 | 14 | 18.9913 | 25.53 |
| 14 | 50.19 | 52.2 | 65.0 | HIF1AN_Flexiil | 99.0 | CILFPDQFECLYPYVHHPCDR              | Propionamide(C)@1; Propionamide(C)@11; Propionamide(C)@21; Label: 13C(6)15N(4)(R)@23                                           |                              | -0.0038519  | 3011.37524 | 1004.799 | 3011.37964 | 1004.80048 | 3 | 13 | 19.2913 | 25.53 |
| 14 | 50.19 | 52.2 | 65.0 | HIF1AN_Flexiil | 99.0 | CILFPDQFECLYPYVHHPCDR              | Propionamide(C)@1; Propionamide(C)@11; Propionamide(C)@21; Label: 13C(6)15N(4)(R)@23                                           |                              | 0.0125783   | 3011.39209 | 753.8553 | 3011.37964 | 753.852173 | 4 | 12 | 26.5815 | 25.53 |
| 14 | 50.19 | 52.2 | 65.0 | HIF1AN_Flexiil | 99.0 | EEAGALGPAWDESQRL                   | Label: 13C(6)15N(4)(R)@16                                                                                                      |                              | -0.00075883 | 1737.81885 | 869.9167 | 1737.8197  | 869.917175 | 2 | 19 | 18.0721 | 25.53 |
| 14 | 50.19 | 52.2 | 65.0 | HIF1AN_Flexiil | 99.0 | EEAGALGPAWDESQRL                   | Label: 13C(6)15N(4)(R)@16                                                                                                      |                              | 0.00497848  | 1737.82471 | 869.9196 | 1737.8197  | 869.917175 | 2 | 15 | 21.5883 | 25.53 |
| 14 | 50.19 | 52.2 | 65.0 | HIF1AN_Flexiil | 99.0 | EEAGALGPAWDESQRL                   | Label: 13C(6)15N(4)(R)@16                                                                                                      |                              | 0.00065673  | 1737.82068 | 580.2808 | 1737.8197  | 580.280518 | 3 | 15 | 17.8448 | 25.53 |
| 14 | 50.19 | 52.2 | 65.0 | HIF1AN_Flexiil | 99.0 | EEAGALGPAWDESQRL                   | Label: 13C(6)15N(4)(R)@16                                                                                                      |                              | 0.00497848  | 1737.82471 | 869.9196 | 1737.8197  | 869.917175 | 2 | 13 | 20.8326 | 25.53 |
| 14 | 50.19 | 52.2 | 65.0 | HIF1AN_Flexiil | 99.0 | EEAGALGPAWDESQRL                   | Label: 13C(6)15N(4)(R)@16                                                                                                      |                              | 0.00497848  | 1737.82471 | 869.9196 | 1737.8197  | 869.917175 | 2 | 13 | 21.0919 | 25.53 |
| 14 | 50.19 | 52.2 | 65.0 | HIF1AN_Flexiil | 99.0 | EEAGALGPAWDESQRL                   | Label: 13C(6)15N(4)(R)@16                                                                                                      |                              | 0.00497848  | 1737.82471 | 869.9196 | 1737.8197  | 869.917175 | 2 | 10 | 22.5982 | 25.53 |
| 14 | 50.19 | 52.2 | 65.0 | HIF1AN_Flexiil | 99.0 | EEAGALGPAWDESQRL                   | Label: 13C(6)15N(4)(R)@16                                                                                                      |                              | 0.00497848  | 1737.82471 | 869.9196 | 1737.8197  | 869.917175 | 2 | 10 | 22.3386 | 25.53 |
| 14 | 50.19 | 52.2 | 65.0 | HIF1AN_Flexiil | 99.0 | EEAGALGPAWDESQRL                   | Label: 13C(6)15N(4)(R)@16                                                                                                      |                              | 0.00497848  | 1737.82471 | 869.9196 | 1737.8197  | 869.917175 | 2 | 8  | 26.451  | 25.53 |
| 14 | 50.19 | 52.2 | 65.0 | HIF1AN_Flexiil | 99.0 | FHEFVEK                            | Label: 13C(6)15N(4)(R)@7                                                                                                       |                              | -0.00161297 | 942.467468 | 472.241  | 942.469055 | 472.241821 | 2 | 11 | 15.363  | 25.53 |
| 14 | 50.19 | 52.2 | 65.0 | HIF1AN_Flexiil | 99.0 | FHEFVEK                            | Label: 13C(6)15N(2)(K)@7                                                                                                       |                              | -0.010366   | 934.444458 | 468.2295 | 934.454895 | 468.234711 | 2 | 10 | 15.2093 | 25.53 |
| 14 | 50.19 | 52.2 | 65.0 | HIF1AN_Flexiil | 99.0 | FHEFVEKLQDIQQR                     | Label: 13C(6)15N(2)(K)@7; Label: 13C(6)15N(4)(R)@14                                                                            | missed K-L@7                 | -0.0123582  | 1833.93689 | 612.3196 | 1833.94922 | 612.323669 | 3 | 15 | 16.8093 | 25.53 |
| 14 | 50.19 | 52.2 | 65.0 | HIF1AN_Flexiil | 99.0 | FHEFVEKLQDIQQR                     | Label: 13C(6)15N(2)(K)@7; Deamidated(Q)@9; Label: 13C(6)15N(4)(R)@14                                                           | missed K-L@7                 | 0.0356817   | 1834.96899 | 459.7495 | 1834.93323 | 459.740601 | 4 | 12 | 16.8338 | 25.53 |
| 14 | 50.19 | 52.2 | 65.0 | HIF1AN_Flexiil | 99.0 | IVMDFLGFNWNWINKQGGKR               | Deamidated(N)@9; Label: 13C(6)15N(2)(K)@15; Label: 13C(6)15N(2)(K)@19; Label: 13C(6)15N(4)(R)@20                               | missed K-Q@15; missed K-R@19 | -0.00538215 | 2520.28931 | 631.0796 | 2520.29468 | 631.080933 | 4 | 12 | 20.1771 | 25.53 |
| 14 | 50.19 | 52.2 | 65.0 | HIF1AN_Flexiil | 99.0 | KVMDFLGFNWNWINKQGGK                | Label: 13C(6)15N(2)(K)@1; Deamidated(N)@10; Label: 13C(6)15N(2)(K)@16; Label: 13C(6)15N(2)(K)@20                               | missed K-I@1; missed K-Q@16  | 0.0348644   | 2490.32935 | 623.5896 | 2490.29443 | 623.580872 | 4 | 14 | 20.0526 | 25.53 |
| 14 | 50.19 | 52.2 | 65.0 | HIF1AN_Flexiil | 99.0 | KMANFQNFKPR                        | Label: 13C(6)15N(2)(K)@1; Label: 13C(6)15N(2)(K)@9; Label: 13C(6)15N(4)(R)@11                                                  | missed K-M@1                 | -0.00199117 | 1405.74793 | 469.5899 | 1405.74988 | 469.590576 | 3 | 14 | 15.6577 | 25.53 |
| 14 | 50.19 | 52.2 | 65.0 | HIF1AN_Flexiil | 99.0 | KMANFQNFKPR                        | Label: 13C(6)15N(2)(K)@1; Label: 13C(6)15N(2)(K)@9; Label: 13C(6)15N(4)(R)@11                                                  | missed K-M@1                 | -0.00043478 | 1405.74939 | 469.5904 | 1405.74988 | 469.590576 | 3 | 13 | 15.9159 | 25.53 |
| 14 | 50.19 | 52.2 | 65.0 | HIF1AN_Flexiil | 99.0 | LSQSDPRAEELIENEPEPVLTDNLVYPALK     | Label: 13C(6)15N(4)(R)@7; Deamidated(N)@14; Label: 13C(6)15N(2)(K)@31                                                          | missed R-A@7                 | 0.00798079  | 3500.7981  | 1167.94  | 3500.79839 | 1167.93701 | 3 | 24 | 19.646  | 25.53 |
| 14 | 50.19 | 52.2 | 65.0 | HIF1AN_Flexiil | 99.0 | LYLOQTLNDTVGR                      | Deamidated(N)@8; Label: 13C(6)15N(4)(R)@13                                                                                     |                              | -0.00700489 | 1530.78491 | 766.3997 | 1530.79175 | 766.403137 | 2 | 15 | 17.4147 | 25.53 |
| 14 | 50.19 | 52.2 | 65.0 | HIF1AN_Flexiil | 99.0 | LYLOQTLNDTVGR                      | Label: 13C(6)15N(4)(R)@13                                                                                                      |                              | -0.00309219 | 1529.80469 | 765.9096 | 1529.80774 | 765.911133 | 2 | 14 | 18.145  | 25.53 |
| 14 | 50.19 | 52.2 | 65.0 | HIF1AN_Flexiil | 99.0 | LYLOQTLNDTVGR                      | Label: 13C(6)15N(4)(R)@13                                                                                                      |                              | -0.00309219 | 1529.80469 | 765.9096 | 1529.80774 | 765.911133 | 2 | 9  | 21.7706 | 25.53 |
| 14 | 50.19 | 52.2 | 65.0 | HIF1AN_Flexiil | 99.0 | LYLOQTLNDTVGRK                     | Deamidated(Q)@5; Label: 13C(6)15N(4)(R)@13; Label: 13C(6)15N(2)(K)@14                                                          | missed R-K@13                | 0.0237731   | 1666.92468 | 834.4696 | 1666.90088 | 834.457703 | 2 | 11 | 17.2956 | 25.53 |
| 14 | 50.19 | 52.2 | 65.0 | HIF1AN_Flexiil | 99.0 | MANFQNFKPR                         | Label: 13C(6)15N(2)(K)@8; Label: 13C(6)15N(4)(R)@10                                                                            |                              | 0.00390125  | 1269.64465 | 635.8296 | 1269.64075 | 635.827637 | 2 | 12 | 16.6198 | 25.53 |
| 14 | 50.19 | 52.2 | 65.0 | HIF1AN_Flexiil | 99.0 | MLGEALGNPOEVGPLLNTMIK              | Oxidation(M)@1; Label: 13C(6)15N(2)(K)@21                                                                                      |                              | 0.00841302  | 2248.17725 | 750.3997 | 2248.1687  | 750.396851 | 3 | 19 | 19.7618 | 25.53 |
| 14 | 50.19 | 52.2 | 65.0 | HIF1AN_Flexiil | 99.0 | MLGEALGNPOEVGPLLNTMIK              | Oxidation(M)@1; Deamidated(N)@8; Label: 13C(6)15N(2)(K)@21                                                                     |                              | 0.0121729   | 2249.16528 | 1125.59  | 2249.15259 | 1125.58362 | 2 | 19 | 19.6785 | 25.53 |
| 14 | 50.19 | 52.2 | 65.0 | HIF1AN_Flexiil | 99.0 | MLGEALGNPOEVGPLLNTMIK              | Oxidation(M)@1; Label: 13C(6)15N(2)(K)@21                                                                                      |                              | -0.00380577 | 2248.16528 | 1125.09  | 2248.1687  | 1125.09155 | 2 | 22 | 19.855  | 25.53 |
| 14 | 50.19 | 52.2 | 65.0 | HIF1AN_Flexiil | 99.0 | MLGEALGNPOEVGPLLNTMIK              | Label: 13C(6)15N(2)(K)@21                                                                                                      |                              | 0.00484795  | 2232.17847 | 745.0668 | 2232.17383 | 745.065186 | 3 | 23 | 19.9251 | 25.53 |
| 14 | 50.19 | 52.2 | 65.0 | HIF1AN_Flexiil | 99.0 | MLGEALGNPOEVGPLLNTMIK              | Label: 13C(6)15N(2)(K)@21                                                                                                      |                              | 0.00746071  | 2232.1814  | 1117.098 | 2232.17383 | 1117.09412 | 2 | 22 | 19.9296 | 25.53 |
| 14 | 50.19 | 52.2 | 65.0 | HIF1AN_Flexiil | 99.0 | MLGEALGNPOEVGPLLNTMIK              | Deamidated(N)@8; Label: 13C(6)15N(2)(K)@21                                                                                     |                              | 0.0193068   | 2233.17725 | 745.3997 | 2233.15772 | 745.393189 | 3 | 20 | 20.1981 | 25.53 |
| 14 | 50.19 | 52.2 | 65.0 | HIF1AN_Flexiil | 99.0 | QSQVDFDNPDYER                      | Gln->pyro-Glu@N-term; Label: 13C(6)15N(4)(R)@13                                                                                |                              | 0.00291767  | 1604.66492 | 803.3397 | 1604.66937 | 803.338196 | 2 | 14 | 17.179  | 25.53 |
| 14 | 50.19 | 52.2 | 65.0 | HIF1AN_Flexiil | 99.0 | RIEYPLKAHQK                        | Label: 13C(6)15N(4)(R)@1; Label: 13C(6)15N(2)(K)@7; Label: 13C(6)15N(2)(K)@11                                                  | missed R-I@1; missed K-A@7   | -0.00296743 | 1407.81665 | 470.2795 | 1407.8197  | 470.280518 | 3 | 12 | 14.1053 | 25.53 |
| 14 | 50.19 | 52.2 | 65.0 | HIF1AN_Flexiil | 99.0 | RIEYPLKAHQK                        | Label: 13C(6)15N(4)(R)@1; Label: 13C(6)15N(2)(K)@7; Label: 13C(6)15N(2)(K)@11                                                  | missed R-I@1; missed K-A@7   | -0.00166692 | 1407.81812 | 704.9163 | 1407.8197  | 704.917114 | 2 | 11 | 13.9337 | 25.53 |
| 14 | 50.19 | 52.2 | 65.0 | HIF1AN_Flexiil | 99.0 | SNREEMKFHEFVEK                     | Label: 13C(6)15N(4)(R)@3; Label: 13C(6)15N(2)(K)@7; Label: 13C(6)15N(2)(K)@14                                                  | missed R-E@3; missed K-F@7   | -0.00450465 | 1834.88379 | 612.6352 | 1834.88818 | 612.636658 | 3 | 15 | 15.5807 | 25.53 |
| 14 | 50.19 | 52.2 | 65.0 | HIF1AN_Flexiil | 99.0 | SNREEMKFHEFVEK                     | Label: 13C(6)15N(4)(R)@3; Label: 13C(6)15N(2)(K)@7; Label: 13C(6)15N(2)(K)@14                                                  | missed R-E@3; missed K-F@7   | 0.00075612  | 1834.88892 | 459.7295 | 1834.88818 | 459.72934  | 4 | 14 | 15.5769 | 25.53 |
| 14 | 50.19 | 52.2 | 65.0 | HIF1AN_Flexiil | 99.0 | SNREEMKFHEFVEK                     | Label: 13C(6)15N(4)(R)@3; Label: 13C(6)15N(2)(K)@7; Label: 13C(6)15N(2)(K)@14                                                  | missed R-E@3; missed K-F@7   | 0.00075612  | 1834.88892 | 459.7295 | 1834.88818 | 459.72934  | 4 | 13 | 15.8512 | 25.53 |
| 14 | 50.19 | 52.2 | 65.0 | HIF1AN_Flexiil | 99.0 | SNREEMKFHEFVEK                     | Label: 13C(6)15N(4)(R)@3; Label: 13C(6)15N(2)(K)@7; Label: 13C(6)15N(2)(K)@14                                                  | missed R-E@3; missed K-F@7   | 0.00867895  | 1834.89697 | 612.6396 | 1834.88818 | 612.636658 | 3 | 12 | 15.8527 | 25.53 |
| 14 | 50.19 | 52.2 | 65.0 | HIF1AN_Flexiil | 99.0 | WDLEYLQENIGNGDFSYSASTHK            | Deamidated(N)@12; Label: 13C(6)15N(2)(K)@24                                                                                    |                              | 0.0121726   | 2781.2771  | 928.0997 | 2781.26489 | 928.095581 | 3 | 24 | 19.2666 | 25.53 |
| 14 | 50.19 | 52.2 | 65.0 | HIF1AN_Flexiil | 99.0 | WDLEYLQENIGNGDFSYSASTHK            | Deamidated(N)@12; Label: 13C(6)15N(2)(K)@24                                                                                    |                              | 0.0121726   | 2781.2771  | 928.0997 | 2781.26489 | 928.095581 | 3 | 12 | 21.0896 | 25.53 |
| 14 | 50.19 | 52.2 | 65.0 | HIF1AN_Flexiil | 99.0 | WDLEYLQENIGNGDFSYSASTHK            | Label: 13C(6)15N(2)(K)@24                                                                                                      |                              | -0.0117327  | 2780.26929 | 927.7637 | 2780.28101 | 927.767578 | 3 | 25 | 19.4884 | 25.53 |

|    |       |       |                     |                                    |                                                                                                                                                                   |                                 |             |            |          |            |            |   |    |         |       |
|----|-------|-------|---------------------|------------------------------------|-------------------------------------------------------------------------------------------------------------------------------------------------------------------|---------------------------------|-------------|------------|----------|------------|------------|---|----|---------|-------|
| 15 | 49.13 | 51.13 | 73.0 SRGAP1_FlexIII | 99.0 KTTEATLQTIQDMVTIEDYDVSECFQHSR | Label: 13C(6)15N(2)(K) @ 1; Deamidated(Q) @ 11; Propionamide(C) @ 24; Label: 13C(6)15N(4)(R) @ 29                                                                 | missed K-T @ 1                  | 0.00726453  | 3477.61133 | 1160.211 | 3477.60352 | 1160.2085  | 3 | 22 | 20.005  | 3.80  |
| 15 | 49.13 | 51.13 | 73.0 SRGAP1_FlexIII | 99.0 LATUKIENEVKK                  | Label: 13C(6)15N(2)(K) @ 5; Label: 13C(6)15N(2)(K) @ 12; Label: 13C(6)15N(2)(K) @ 13                                                                              | missed K-I @ 5; missed K-K @ 12 | -0.00807856 | 1537.90613 | 769.9603 | 1537.91419 | 769.964356 | 2 | 15 | 15.4339 | 3.80  |
| 15 | 49.13 | 51.13 | 73.0 SRGAP1_FlexIII | 99.0 LREYLEGSNLITK                 | Label: 13C(6)15N(4)(R) @ 2; Label: 13C(6)15N(2)(K) @ 13                                                                                                           | missed R-E @ 2                  | 0.00991971  | 1552.8678  | 518.6299 | 1552.85803 | 518.626587 | 3 | 16 | 16.8585 | 3.80  |
| 15 | 49.13 | 51.13 | 73.0 SRGAP1_FlexIII | 99.0 NEYLLTLEATNASVFK              | Label: 13C(6)15N(2)(K) @ 16                                                                                                                                       |                                 | 0.00170223  | 1819.94653 | 910.9805 | 1819.9447  | 910.979614 | 2 | 18 | 19.9323 | 3.80  |
| 15 | 49.13 | 51.13 | 73.0 SRGAP1_FlexIII | 99.0 SGDPVFHIR                     | Label: 13C(6)15N(4)(R) @ 9                                                                                                                                        |                                 | 0.00015982  | 1036.53308 | 519.2738 | 1036.53296 | 519.273743 | 2 | 14 | 16.2959 | 3.80  |
| 15 | 49.13 | 51.13 | 73.0 SRGAP1_FlexIII | 99.0 SKEIAFLQHEDLMK                | Label: 13C(6)15N(2)(K) @ 2; Label: 13C(6)15N(2)(K) @ 14                                                                                                           | missed K-E @ 2                  | -0.00071329 | 1703.88806 | 568.97   | 1703.88879 | 568.970215 | 3 | 15 | 17.3234 | 3.80  |
| 15 | 49.13 | 51.13 | 73.0 SRGAP1_FlexIII | 99.0 STVSETYLSKPSIAK               | Label: 13C(6)15N(2)(K) @ 10; Label: 13C(6)15N(2)(K) @ 15                                                                                                          |                                 | -0.00155834 | 1625.8833  | 813.9489 | 1625.88464 | 813.949646 | 2 | 18 | 15.8523 | 3.80  |
| 15 | 49.13 | 51.13 | 73.0 SRGAP1_FlexIII | 99.0 TTEATLQTIQDMVTIEDYDVSECFQHSR  | Deamidated(Q) @ 10; Propionamide(C) @ 23                                                                                                                          |                                 | 0.0246153   | 3331.51123 | 1111.511 | 3331.48608 | 1111.50269 | 3 | 21 | 20.3175 | 3.80  |
| 15 | 49.13 | 51.13 | 73.0 SRGAP1_FlexIII | 99.0 TYLSAEYNLETSR                 | Label: 13C(6)15N(4)(R) @ 13                                                                                                                                       |                                 | 0.00669957  | 1555.74609 | 778.8803 | 1555.73938 | 778.876953 | 2 | 17 | 17.1813 | 3.80  |
| 15 | 49.13 | 51.13 | 73.0 SRGAP1_FlexIII | 99.0 TYLSAEYNLETSRHEGLDIENAVDNLEPR | Deamidated(N) @ 8; Label: 13C(6)15N(4)(R) @ 13; Label: 13C(6)15N(4)(R) @ 30                                                                                       | missed R-H @ 13                 | 0.0174563   | 3481.69263 | 871.4304 | 3481.67529 | 871.426086 | 4 | 12 | 20.2832 | 3.80  |
| 15 | 49.13 | 51.13 | 73.0 SRGAP1_FlexIII | 99.0 VLNELYTVMK                    | Label: 13C(6)15N(2)(K) @ 10                                                                                                                                       |                                 | 0.00389395  | 1216.66565 | 609.3401 | 1216.66174 | 609.338135 | 2 | 11 | 18.3157 | 3.80  |
| 15 | 49.13 | 51.13 | 73.0 SRGAP1_FlexIII | 99.0 VQLQLQDLQDFFR                 | Label: 13C(6)15N(4)(R) @ 12                                                                                                                                       |                                 | -0.00151693 | 1530.80542 | 766.41   | 1530.80701 | 766.410767 | 2 | 13 | 20.449  | 3.80  |
| 15 | 49.13 | 51.13 | 73.0 SRGAP1_FlexIII | 99.0 YYIHDLSDLIDCCDLGYHASLNR       | Propionamide(C) @ 12; Propionamide(C) @ 13; Label: 13C(6)15N(4)(R) @ 23                                                                                           |                                 | 0.00079641  | 2850.29883 | 713.582  | 2850.2981  | 713.581787 | 4 | 21 | 18.8274 | 3.80  |
| 15 | 49.13 | 51.13 | 73.0 SRGAP1_FlexIII | 99.0 ARNEVLLTLEATNASVFK            | Label: 13C(6)15N(4)(R) @ 2; Label: 13C(6)15N(2)(K) @ 18                                                                                                           | missed R-N @ 2                  | 0.00267385  | 2057.09424 | 686.7053 | 2057.09131 | 686.704346 | 3 | 19 | 18.7955 | 3.80  |
| 15 | 49.13 | 51.13 | 73.0 SRGAP1_FlexIII | 99.0 DHATLSDIYLNNVIMR              | Label: 13C(6)15N(4)(R) @ 16                                                                                                                                       |                                 | 0.00446332  | 1883.94849 | 628.9901 | 1883.94385 | 628.988586 | 3 | 16 | 18.8173 | 3.80  |
| 15 | 49.13 | 51.13 | 73.0 SRGAP1_FlexIII | 99.0 DQNLSPVNCWYLLNOVVR            | Deamidated(N) @ 9; Propionamide(C) @ 10; Label: 13C(6)15N(4)(R) @ 19                                                                                              |                                 | 0.0214258   | 2369.229   | 790.7503 | 2369.20776 | 790.743164 | 3 | 16 | 20.5832 | 3.80  |
| 15 | 49.13 | 51.13 | 73.0 SRGAP1_FlexIII | 99.0 ESKDHATLSDIYLNNVIMR           | Label: 13C(6)15N(2)(K) @ 3; Deamidated(N) @ 14; Label: 13C(6)15N(4)(R) @ 19                                                                                       | missed K-D @ 3                  | 0.0189775   | 2237.13062 | 560.2899 | 2237.11182 | 560.285217 | 4 | 12 | 18.2305 | 3.80  |
| 15 | 49.13 | 51.13 | 73.0 SRGAP1_FlexIII | 99.0 FGFVCICHQDPTFLYK              | Propionamide(C) @ 5; Propionamide(C) @ 7; Label: 13C(6)15N(2)(K) @ 16                                                                                             |                                 | 0.00015565  | 2101.98877 | 701.6702 | 2101.98853 | 701.670105 | 3 | 15 | 19.3212 | 3.80  |
| 15 | 49.13 | 51.13 | 73.0 SRGAP1_FlexIII | 99.0 FMEMYPAACFPMMK                | Propionamide(C) @ 10; Label: 13C(6)15N(2)(K) @ 14                                                                                                                 |                                 | 0.00436184  | 1740.76709 | 871.3908 | 1740.7627  | 871.388672 | 2 | 12 | 19.3972 | 3.80  |
| 15 | 49.13 | 51.13 | 73.0 SRGAP1_FlexIII | 99.0 FMQISEDSTR                    |                                                                                                                                                                   |                                 | 0.00048956  | 1212.54504 | 607.2798 | 1212.54443 | 607.279541 | 2 | 11 | 16.156  | 3.80  |
| 15 | 49.13 | 51.13 | 73.0 SRGAP1_FlexIII | 99.0 FMQISEDSTR                    | Label: 13C(6)15N(4)(R) @ 10                                                                                                                                       |                                 | 0.00078112  | 1222.55371 | 612.2841 | 1222.55273 | 612.28363  | 2 | 11 | 16.3363 | 3.80  |
| 15 | 49.13 | 51.13 | 73.0 SRGAP1_FlexIII | 99.0 HEGLDIENAVDNLEPR              | Deamidated(N) @ 9; Label: 13C(6)15N(4)(R) @ 17                                                                                                                    |                                 | 0.0202396   | 1943.96668 | 972.9906 | 1943.94641 | 972.980469 | 2 | 12 | 19.3908 | 3.80  |
| 15 | 49.13 | 51.13 | 73.0 SRGAP1_FlexIII | 99.0 LATUKIENEVKK                  | Label: 13C(6)15N(2)(K) @ 5; Label: 13C(6)15N(2)(K) @ 12; Label: 13C(6)15N(2)(K) @ 13                                                                              | missed K-I @ 5; missed K-K @ 12 | 0.013775    | 1537.92786 | 513.6499 | 1537.91419 | 513.645325 | 3 | 10 | 15.3846 | 3.80  |
| 15 | 49.13 | 51.13 | 73.0 SRGAP1_FlexIII | 99.0 NEYLLTLEATNASVFK              | Label: 13C(6)15N(2)(K) @ 16                                                                                                                                       |                                 | 0.00170223  | 1819.94653 | 910.9805 | 1819.9447  | 910.979614 | 2 | 20 | 19.4058 | 3.80  |
| 15 | 49.13 | 51.13 | 73.0 SRGAP1_FlexIII | 99.0 NEYLLTLEATNASVFK              | Deamidated(N) @ 1; Label: 13C(6)15N(2)(K) @ 16                                                                                                                    |                                 | 0.0176882   | 1820.94653 | 911.4805 | 1820.92871 | 911.471619 | 2 | 15 | 19.6743 | 3.80  |
| 15 | 49.13 | 51.13 | 73.0 SRGAP1_FlexIII | 99.0 NEYLLTLEATNASVFK              | Label: 13C(6)15N(2)(K) @ 16                                                                                                                                       |                                 | 0.00170223  | 1819.94653 | 910.9805 | 1819.9447  | 910.979614 | 2 | 15 | 26.4892 | 3.80  |
| 15 | 49.13 | 51.13 | 73.0 SRGAP1_FlexIII | 99.0 NEYLLTLEATNASVFK              | Deamidated(N) @ 1; Label: 13C(6)15N(2)(K) @ 16                                                                                                                    |                                 | 0.0176882   | 1820.94653 | 911.4805 | 1820.92871 | 911.471619 | 2 | 13 | 26.4442 | 3.80  |
| 15 | 49.13 | 51.13 | 73.0 SRGAP1_FlexIII | 99.0 SGDPVFHIR                     | Label: 13C(6)15N(4)(R) @ 9                                                                                                                                        |                                 | -0.00157678 | 1036.53125 | 346.5177 | 1036.53296 | 346.51825  | 3 | 10 | 16.2725 | 3.80  |
| 15 | 49.13 | 51.13 | 73.0 SRGAP1_FlexIII | 99.0 STVSETYLSKPSIAK               | Label: 13C(6)15N(2)(K) @ 10; Label: 13C(6)15N(2)(K) @ 15                                                                                                          |                                 | 0.00149342  | 1625.88623 | 813.9504 | 1625.88464 | 813.949646 | 2 | 15 | 16.132  | 3.80  |
| 15 | 49.13 | 51.13 | 73.0 SRGAP1_FlexIII | 99.0 STVSETYLSKPSIAK               | Label: 13C(6)15N(2)(K) @ 10; Label: 13C(6)15N(2)(K) @ 15                                                                                                          |                                 | 0.00320531  | 1625.88794 | 542.9699 | 1625.88464 | 542.968872 | 3 | 12 | 15.8306 | 3.80  |
| 15 | 49.13 | 51.13 | 73.0 SRGAP1_FlexIII | 99.0 STVSETYLSKPSIAK               | Label: 13C(6)15N(2)(K) @ 10; Label: 13C(6)15N(2)(K) @ 15                                                                                                          |                                 | 0.00082493  | 1625.8855  | 542.9691 | 1625.88464 | 542.968872 | 3 | 10 | 16.1038 | 3.80  |
| 15 | 49.13 | 51.13 | 73.0 SRGAP1_FlexIII | 99.0 TTEATLQTIQDMVTIEDYDVSECFQHSR  | Deamidated(Q) @ 10; Propionamide(C) @ 23; Label: 13C(6)15N(4)(R) @ 28                                                                                             |                                 | 0.00623012  | 3341.50098 | 1114.841 | 3341.49439 | 1114.83875 | 3 | 19 | 20.2106 | 3.80  |
| 15 | 49.13 | 51.13 | 73.0 SRGAP1_FlexIII | 99.0 TTEATLQTIQDMVTIEDYDVSECFQHSR  | Propionamide(C) @ 23; Label: 13C(6)15N(4)(R) @ 28                                                                                                                 |                                 | 0.0222295   | 3340.53247 | 836.1404 | 3340.51025 | 836.134827 | 4 | 20 | 20.2745 | 3.80  |
| 15 | 49.13 | 51.13 | 73.0 SRGAP1_FlexIII | 99.0 TTEATLQTIQDMVTIEDYDVSECFQHSR  | Deamidated(Q) @ 10; Propionamide(C) @ 23; Label: 13C(6)15N(4)(R) @ 28                                                                                             |                                 | 0.00623012  | 3341.50098 | 1114.841 | 3341.49439 | 1114.83875 | 3 | 19 | 20.4928 | 3.80  |
| 15 | 49.13 | 51.13 | 73.0 SRGAP1_FlexIII | 99.0 TTEATLQTIQDMVTIEDYDVSECFQHSR  | Deamidated(Q) @ 10; Propionamide(C) @ 23; Label: 13C(6)15N(4)(R) @ 28                                                                                             |                                 | 0.0362595   | 3341.53101 | 1114.851 | 3341.49439 | 1114.83875 | 3 | 15 | 26.5409 | 3.80  |
| 15 | 49.13 | 51.13 | 73.0 SRGAP1_FlexIII | 99.0 VQLQLQDLQDFFR                 | Label: 13C(6)15N(4)(R) @ 12                                                                                                                                       |                                 | -0.00102865 | 1530.80603 | 766.4103 | 1530.80701 | 766.410767 | 2 | 11 | 20.7047 | 3.80  |
| 15 | 49.13 | 51.13 | 73.0 SRGAP1_FlexIII | 99.0 YPTFLYK                       | Label: 13C(6)15N(2)(K) @ 7                                                                                                                                        | cleaved D-Y @ N-term            | -0.00165037 | 938.497681 | 470.2561 | 938.499329 | 470.256928 | 2 | 9  | 18.0092 | 3.80  |
| 15 | 49.13 | 51.13 | 73.0 SRGAP1_FlexIII | 99.0 YPTFLYK                       | Label: 13C(6)15N(2)(K) @ 7                                                                                                                                        | cleaved D-Y @ N-term            | 0.00200099  | 938.499451 | 470.257  | 938.499329 | 470.256928 | 2 | 9  | 17.9008 | 3.80  |
| 15 | 49.13 | 51.13 | 73.0 SRGAP1_FlexIII | 99.0 YPTFLYK                       | Label: 13C(6)15N(2)(K) @ 7                                                                                                                                        | cleaved D-Y @ N-term            | -0.00091407 | 938.498474 | 470.2565 | 938.499329 | 470.256928 | 2 | 9  | 17.7612 | 3.80  |
| 15 | 49.13 | 51.13 | 73.0 SRGAP1_FlexIII | 99.0 YYIHDLSDLIDCCDLGYHASLNR       | Propionamide(C) @ 12; Propionamide(C) @ 13; Deamidated(N) @ 22; Label: 13C(6)15N(4)(R) @ 23                                                                       |                                 | 0.0178171   | 2851.30005 | 951.4406 | 2851.28198 | 951.434631 | 3 | 15 | 18.842  | 3.80  |
| 16 | 48.74 | 50.75 | 67.3 CAMK2B_FlexIII | 99.0 AGAYDFPSPEDWTVTPEAK           | Label: 13C(6)15N(2)(K) @ 19                                                                                                                                       |                                 | -0.00123748 | 2087.95532 | 1044.985 | 2087.95679 | 1044.9856  | 2 | 18 | 18.6464 | 20.90 |
| 16 | 48.74 | 50.75 | 67.3 CAMK2B_FlexIII | 99.0 DLKPENLLLASK                  | Label: 13C(6)15N(2)(K) @ 3; Label: 13C(6)15N(2)(K) @ 12                                                                                                           |                                 | -0.0014868  | 1355.79785 | 452.9399 | 1355.79956 | 452.94046  | 3 | 15 | 17.6812 | 20.90 |
| 16 | 48.74 | 50.75 | 67.3 CAMK2B_FlexIII | 99.0 EYSEADASHCIIQLEAVLHCHQMGMVVHR | Propionamide(C) @ 11; Deamidated(Q) @ 14; Propionamide(C) @ 22; Label: 13C(6)15N(4)(R) @ 30                                                                       |                                 | 0.00818716  | 3618.67627 | 604.12   | 3618.66821 | 604.118652 | 6 | 13 | 20.1298 | 20.90 |
| 16 | 48.74 | 50.75 | 67.3 CAMK2B_FlexIII | 99.0 FTDEYQLYEDIGK                 | Label: 13C(6)15N(2)(K) @ 13                                                                                                                                       |                                 | -0.00409241 | 1627.74573 | 814.8801 | 1627.74976 | 814.882141 | 2 | 13 | 26.4372 | 20.90 |
| 16 | 48.74 | 50.75 | 67.3 CAMK2B_FlexIII | 99.0 GAILTTLMLATR                  | Label: 13C(6)15N(4)(R) @ 11                                                                                                                                       |                                 | -0.00074622 | 1156.65064 | 579.3326 | 1156.65137 | 579.332947 | 2 | 13 | 18.5048 | 20.90 |
| 16 | 48.74 | 50.75 | 67.3 CAMK2B_FlexIII | 99.0 GTLPPAALESSDSANTTIEDEDAK      | Label: 13C(6)15N(2)(K) @ 24                                                                                                                                       |                                 | 0.00609802  | 2439.14331 | 1220.579 | 2439.13794 | 1220.57629 | 2 | 23 | 16.9051 | 20.90 |
| 16 | 48.74 | 50.75 | 67.3 CAMK2B_FlexIII | 99.0 ICDPGLTSFEPEALGNLVEGMDFHR     | Propionamide(C) @ 2; Label: 13C(6)15N(4)(R) @ 25                                                                                                                  |                                 | -0.00158527 | 2827.3169  | 943.4462 | 2827.31836 | 943.446777 | 3 | 25 | 20.1285 | 20.90 |
| 16 | 48.74 | 50.75 | 67.3 CAMK2B_FlexIII | 99.0 ITAEALKHPWVCQR                | Label: 13C(6)15N(2)(K) @ 8; Propionamide(C) @ 13; Label: 13C(6)15N(4)(R) @ 15                                                                                     | missed K-H @ 8                  | 0.00140723  | 1876.98633 | 626.6694 | 1876.98486 | 626.668945 | 3 | 15 | 15.3034 | 20.90 |
| 16 | 48.74 | 50.75 | 67.3 CAMK2B_FlexIII | 99.0 KADGVKPQTNSTKNSAATSPK         | Label: 13C(6)15N(2)(K) @ 1; Label: 13C(6)15N(2)(K) @ 6; Label: 13C(6)15N(2)(K) @ 13; Deamidated(N) @ 14; Label: 13C(6)15N(2)(K) @ missed K-A @ 1; missed K-N @ 13 | missed K-L @ 1; missed K-G @ 3  | -0.0147823  | 2233.1709  | 559.3    | 2233.18555 | 559.30365  | 4 | 17 | 7.6999  | 20.90 |
| 16 | 48.74 | 50.75 | 67.3 CAMK2B_FlexIII | 99.0 KLGAILTTLMLATR                | Label: 13C(6)15N(2)(K) @ 1; Label: 13C(6)15N(2)(K) @ 3; Label: 13C(6)15N(4)(R) @ 14                                                                               |                                 | -0.00567597 | 1541.94812 | 514.99   | 1541.95374 | 514.991882 | 3 | 14 | 17.5173 | 20.90 |
| 16 | 48.74 | 50.75 | 67.3 CAMK2B_FlexIII | 99.0 LCTGHEYAAK                    | Propionamide(C) @ 2; Label: 13C(6)15N(2)(K) @ 10                                                                                                                  |                                 | 0.00051775  | 1170.55884 | 586.2867 | 1170.55835 | 586.286438 | 2 | 13 | 12.7073 | 20.90 |
| 16 | 48.74 | 50.75 | 67.3 CAMK2B_FlexIII | 99.0 LKGAILTTLMLATR                | Label: 13C(6)15N(2)(K) @ 2; Label: 13C(6)15N(4)(R) @ 13                                                                                                           | missed K-G @ 2                  | -0.00308379 | 1405.84143 | 703.928  | 1405.84446 | 703.929565 | 2 | 18 | 18.2146 | 20.90 |
| 16 | 48.74 | 50.75 | 67.3 CAMK2B_FlexIII | 99.0 LQYIDGQGRPR                   | Label: 13C(6)15N(4)(R) @ 10; Label: 13C(6)15N(4)(R) @ 12                                                                                                          |                                 | -0.00050253 | 1422.74793 | 712.3812 | 1422.74829 | 712.381409 | 2 | 12 | 14.7853 | 20.90 |
| 16 | 48.74 | 50.75 | 67.3 CAMK2B_FlexIII | 99.0 NLINQMLTINPAK                 | Label: 13C(6)15N(2)(K) @ 13                                                                                                                                       |                                 | -0.00183944 | 1476.8197  | 739.4171 | 1476.82141 | 739.417969 | 2 | 16 | 19.5615 | 20.90 |
| 16 | 48.74 | 50.75 | 67.3 CAMK2B_FlexIII | 99.0 NLINQMLTINPAK                 | Label: 13C(6)15N(2)(K) @ 13; Label: 13C(6)15N(4)(R) @ 14                                                                                                          | missed K-R @ 13                 | -0.00190478 | 1642.92883 | 822.4717 | 1642.93079 | 822.472656 | 2 | 14 | 18.9778 | 20.90 |
| 16 | 48.74 | 50.75 | 67.3 CAMK2B_FlexIII | 99.0 NSKPHTTLTNPHVHIGEDAACIAYIR    | Label: 13C(6)15N(2)(K) @ 3; Propionamide(C) @ 23; Label: 13C(6)15N(4)(R) @ 28                                                                                     |                                 | 0.00092892  | 3170.67847 | 793.6769 | 3170.67773 | 793.676697 | 4 | 22 |         |       |

|    |       |       |                     |                                  |                                                                                                                                                                   |             |            |          |            |            |   |    |         |       |
|----|-------|-------|---------------------|----------------------------------|-------------------------------------------------------------------------------------------------------------------------------------------------------------------|-------------|------------|----------|------------|------------|---|----|---------|-------|
| 16 | 48.74 | 50.75 | 67.3 CAMK2B_FlexIII | 99.0 FTDEQYLEDIGK                | Label: 13C(6)15N(2)(K) @ 13                                                                                                                                       | -0.00409241 | 1627.74573 | 814.8801 | 1627.74976 | 814.882141 | 2 | 16 | 18.6754 | 20.90 |
| 16 | 48.74 | 50.75 | 67.3 CAMK2B_FlexIII | 99.0 FTDEQYLEDIGK                | Label: 13C(6)15N(2)(K) @ 13                                                                                                                                       | -0.00409241 | 1627.74573 | 814.8801 | 1627.74976 | 814.882141 | 2 | 9  | 21.716  | 20.90 |
| 16 | 48.74 | 50.75 | 67.3 CAMK2B_FlexIII | 99.0 GAILTTMLATR                 |                                                                                                                                                                   | -0.00102597 | 1146.64209 | 574.3283 | 1146.64307 | 574.328796 | 2 | 12 | 18.5576 | 20.90 |
| 16 | 48.74 | 50.75 | 67.3 CAMK2B_FlexIII | 99.0 GAILTTMLATR                 | Label: 13C(6)15N(4)(R) @ 11                                                                                                                                       | -0.00086829 | 1156.65051 | 579.3325 | 1156.65137 | 579.332947 | 2 | 12 | 18.768  | 20.90 |
| 16 | 48.74 | 50.75 | 67.3 CAMK2B_FlexIII | 99.0 GAILTTMLATR                 | Label: 13C(6)15N(4)(R) @ 11                                                                                                                                       | -0.00587317 | 1156.64551 | 579.33   | 1156.65137 | 579.332947 | 2 | 12 | 19.0313 | 20.90 |
| 16 | 48.74 | 50.75 | 67.3 CAMK2B_FlexIII | 99.0 GTLPPAALESSDSSANTTIEDEDAK   | Deamidated(N) @ 15; Label: 13C(6)15N(2)(K) @ 24                                                                                                                   | 0.0237918   | 2440.14526 | 1221.08  | 2440.12207 | 1221.06824 | 2 | 17 | 16.6268 | 20.90 |
| 16 | 48.74 | 50.75 | 67.3 CAMK2B_FlexIII | 99.0 GTLPPAALESSDSSANTTIEDEDAK   | Label: 13C(6)15N(2)(K) @ 24                                                                                                                                       | 0.00780701  | 2439.14526 | 1220.58  | 2439.13794 | 1220.57629 | 2 | 24 | 17.2345 | 20.90 |
| 16 | 48.74 | 50.75 | 67.3 CAMK2B_FlexIII | 99.0 GTLPPAALESSDSSANTTIEDEDAKAR | Label: 13C(6)15N(2)(K) @ 24; Label: 13C(6)15N(4)(R) @ 26                                                                                                          | -0.00607843 | 2676.27856 | 893.1001 | 2676.28442 | 893.102112 | 3 | 11 | 16.8929 | 20.90 |
| 16 | 48.74 | 50.75 | 67.3 CAMK2B_FlexIII | 99.0 ICDPGLTSFEPEALGNLVGMDFHR    | Propionamide(C) @ 2; Deamidated(N) @ 16; Label: 13C(6)15N(4)(R) @ 25                                                                                              | 0.00364439  | 2828.30542 | 1415.16  | 2828.30249 | 1415.15857 | 2 | 18 | 20.1886 | 20.90 |
| 16 | 48.74 | 50.75 | 67.3 CAMK2B_FlexIII | 99.0 ICDPGLTSFEPEALGNLVGMDFHR    | Propionamide(C) @ 2; Label: 13C(6)15N(4)(R) @ 25                                                                                                                  | 0.0007951   | 2827.31934 | 943.447  | 2827.31836 | 943.446777 | 3 | 22 | 20.3922 | 20.90 |
| 16 | 48.74 | 50.75 | 67.3 CAMK2B_FlexIII | 99.0 ICDPGLTSFEPEALGNLVGMDFHR    | Propionamide(C) @ 2; Deamidated(N) @ 16; Label: 13C(6)15N(4)(R) @ 25                                                                                              | 0.0161695   | 2828.31885 | 943.7802 | 2828.30249 | 943.77478  | 3 | 16 | 20.6587 | 20.90 |
| 16 | 48.74 | 50.75 | 67.3 CAMK2B_FlexIII | 99.0 ICDPGLTSFEPEALGNLVGMDFHR    | Propionamide(C) @ 2; Label: 13C(6)15N(4)(R) @ 25                                                                                                                  | 0.0101335   | 2827.32837 | 943.4501 | 2827.31836 | 943.446777 | 3 | 14 | 19.8062 | 20.90 |
| 16 | 48.74 | 50.75 | 67.3 CAMK2B_FlexIII | 99.0 ITAHEALKHPWVCQR             | Label: 13C(6)15N(2)(K) @ 8; Propionamide(C) @ 13; Label: 13C(6)15N(4)(R) @ 15                                                                                     | 0.0017605   | 1876.98669 | 939.5006 | 1876.98486 | 939.499756 | 2 | 23 | 15.3496 | 20.90 |
| 16 | 48.74 | 50.75 | 67.3 CAMK2B_FlexIII | 99.0 KADGVKPKQTNSTKNSAAATSPK     | Label: 13C(6)15N(2)(K) @ 1; Label: 13C(6)15N(2)(K) @ 6; Label: 13C(6)15N(2)(K) @ 13; Deamidated(N) @ 14; Label: 13C(6)15N(2)(K) @ missed K-A @ 1; missed K-N @ 13 | -0.0147823  | 2233.1709  | 559.3    | 2233.18555 | 559.30365  | 4 | 12 | 7.9602  | 20.90 |
| 16 | 48.74 | 50.75 | 67.3 CAMK2B_FlexIII | 99.0 KADGVKPKQTNSTKNSAAATSPK     | Label: 13C(6)15N(2)(K) @ 1; Label: 13C(6)15N(2)(K) @ 6; Label: 13C(6)15N(2)(K) @ 13; Deamidated(N) @ 14; Label: 13C(6)15N(2)(K) @ missed K-A @ 1; missed K-N @ 13 | -0.00716582 | 2233.17847 | 745.4001 | 2233.18555 | 745.402466 | 3 | 8  | 7.7141  | 20.90 |
| 16 | 48.74 | 50.75 | 67.3 CAMK2B_FlexIII | 99.0 KLGKAILTTMLATR              | Label: 13C(6)15N(2)(K) @ 1; Label: 13C(6)15N(2)(K) @ 3; Label: 13C(6)15N(4)(R) @ 14                                                                               | 0.00160016  | 1541.95532 | 386.4961 | 1541.95374 | 386.495697 | 4 | 11 | 17.5946 | 20.90 |
| 16 | 48.74 | 50.75 | 67.3 CAMK2B_FlexIII | 99.0 LCTGHEYAAK                  | Propionamide(C) @ 2; Label: 13C(6)15N(2)(K) @ 10                                                                                                                  | 0.00710955  | 1170.56543 | 586.29   | 1170.55835 | 586.286438 | 2 | 11 | 12.9862 | 20.90 |
| 16 | 48.74 | 50.75 | 67.3 CAMK2B_FlexIII | 99.0 LCTGHEYAAK                  | Propionamide(C) @ 2; Label: 13C(6)15N(2)(K) @ 10                                                                                                                  | 0.00015154  | 1170.55847 | 586.2865 | 1170.55835 | 586.286438 | 2 | 11 | 13.3145 | 20.90 |
| 16 | 48.74 | 50.75 | 67.3 CAMK2B_FlexIII | 99.0 LCTGHEYAAK                  | Propionamide(C) @ 2; Label: 13C(6)15N(2)(K) @ 10                                                                                                                  | -0.0103336  | 1170.54785 | 391.1899 | 1170.55835 | 391.193359 | 3 | 10 | 13.1061 | 20.90 |
| 16 | 48.74 | 50.75 | 67.3 CAMK2B_FlexIII | 99.0 LCTGHEYAAK                  | Propionamide(C) @ 2; Label: 13C(6)15N(2)(K) @ 10                                                                                                                  | -0.00072053 | 1170.5575  | 391.1931 | 1170.55835 | 391.193359 | 3 | 10 | 12.6726 | 20.90 |
| 16 | 48.74 | 50.75 | 67.3 CAMK2B_FlexIII | 99.0 LKGAITTTMLATR               | Label: 13C(6)15N(2)(K) @ 2; Label: 13C(6)15N(4)(R) @ 13                                                                                                           | -0.00233843 | 1405.84241 | 469.6214 | 1405.8446  | 469.622131 | 3 | 15 | 18.2583 | 20.90 |
| 16 | 48.74 | 50.75 | 67.3 CAMK2B_FlexIII | 99.0 LTQYIDGGRRPR                | Label: 13C(6)15N(4)(R) @ 10; Label: 13C(6)15N(4)(R) @ 12                                                                                                          | -0.00269979 | 1422.74573 | 712.3801 | 1422.74829 | 712.381409 | 2 | 11 | 15.0526 | 20.90 |
| 16 | 48.74 | 50.75 | 67.3 CAMK2B_FlexIII | 99.0 NLINQMLTINPAK               | Deamidated(N) @ 4; Label: 13C(6)15N(2)(K) @ 13                                                                                                                    | 0.00010726  | 1477.80542 | 739.91   | 1477.80542 | 739.909973 | 2 | 12 | 18.9215 | 20.90 |
| 16 | 48.74 | 50.75 | 67.3 CAMK2B_FlexIII | 99.0 NLINQMLTINPAKR              | Label: 13C(6)15N(2)(K) @ 13; Label: 13C(6)15N(4)(R) @ 14                                                                                                          | -0.00018285 | 1642.93066 | 548.6508 | 1642.93079 | 548.650879 | 3 | 14 | 18.952  | 20.90 |
| 16 | 48.74 | 50.75 | 67.3 CAMK2B_FlexIII | 99.0 NLINQMLTINPAKR              | Label: 13C(6)15N(2)(K) @ 13; Label: 13C(6)15N(4)(R) @ 14                                                                                                          | -0.00016992 | 1642.93054 | 411.7399 | 1642.93079 | 411.73996  | 4 | 13 | 18.0104 | 20.90 |
| 16 | 48.74 | 50.75 | 67.3 CAMK2B_FlexIII | 99.0 NLINQMLTINPAKR              | Deamidated(N) @ 4; Label: 13C(6)15N(2)(K) @ 13; Label: 13C(6)15N(4)(R) @ 14                                                                                       | -0.00911335 | 1643.90564 | 822.9601 | 1643.9148  | 822.964661 | 2 | 14 | 19.2314 | 20.90 |
| 16 | 48.74 | 50.75 | 67.3 CAMK2B_FlexIII | 99.0 NLINQMLTINPAKR              | Deamidated(N) @ 4; Label: 13C(6)15N(2)(K) @ 13; Label: 13C(6)15N(4)(R) @ 14                                                                                       | 0.00328973  | 1643.91809 | 548.98   | 1643.9148  | 548.978882 | 3 | 11 | 19.2142 | 20.90 |
| 16 | 48.74 | 50.75 | 67.3 CAMK2B_FlexIII | 99.0 NSKPIHTTILNPHVHVGEDAACIAYIR | Label: 13C(6)15N(2)(K) @ 3; Deamidated(N) @ 11; Propionamide(C) @ 23; Label: 13C(6)15N(4)(R) @ 28                                                                 | 0.0293649   | 3171.69141 | 793.9301 | 3171.66187 | 793.92273  | 4 | 15 | 26.8639 | 20.90 |
| 16 | 48.74 | 50.75 | 67.3 CAMK2B_FlexIII | 99.0 NSKPIHTTILNPHVHVGEDAACIAYIR | Label: 13C(6)15N(2)(K) @ 3; Deamidated(N) @ 11; Propionamide(C) @ 23; Label: 13C(6)15N(4)(R) @ 28                                                                 | 0.0293649   | 3171.69141 | 793.9301 | 3171.66187 | 793.92273  | 4 | 13 | 17.23   | 20.90 |
| 16 | 48.74 | 50.75 | 67.3 CAMK2B_FlexIII | 99.0 NSKPIHTTILNPHVHVGEDAACIAYIR | Label: 13C(6)15N(2)(K) @ 3; Deamidated(N) @ 11; Propionamide(C) @ 23; Label: 13C(6)15N(4)(R) @ 28                                                                 | 0.0368593   | 3171.69824 | 1058.24  | 3171.66187 | 1058.22791 | 3 | 13 | 17.2775 | 20.90 |
| 16 | 48.74 | 50.75 | 67.3 CAMK2B_FlexIII | 99.0 NSKPIHTTILNPHVHVGEDAACIAYIR | Label: 13C(6)15N(2)(K) @ 3; Deamidated(N) @ 11; Propionamide(C) @ 23; Label: 13C(6)15N(4)(R) @ 28                                                                 | -0.0106742  | 3171.65088 | 793.92   | 3171.66187 | 793.92273  | 4 | 13 | 26.6037 | 20.90 |
| 16 | 48.74 | 50.75 | 67.3 CAMK2B_FlexIII | 99.0 NSKPIHTTILNPHVHVGEDAACIAYIR | Label: 13C(6)15N(2)(K) @ 3; Deamidated(N) @ 11; Propionamide(C) @ 23; Label: 13C(6)15N(4)(R) @ 28                                                                 | 0.028647    | 3171.69043 | 793.9299 | 3171.66187 | 793.92273  | 4 | 14 | 17.3231 | 20.90 |
| 16 | 48.74 | 50.75 | 67.3 CAMK2B_FlexIII | 99.0 NSKPIHTTILNPHVHVGEDAACIAYIR | Label: 13C(6)15N(2)(K) @ 3; Propionamide(C) @ 23; Label: 13C(6)15N(4)(R) @ 28                                                                                     | 0.0126629   | 3170.69043 | 793.6799 | 3170.67773 | 793.676697 | 4 | 11 | 26.8408 | 20.90 |
| 16 | 48.74 | 50.75 | 67.3 CAMK2B_FlexIII | 99.0 NSKPIHTTILNPHVHVGEDAACIAYIR | Label: 13C(6)15N(2)(K) @ 3; Deamidated(N) @ 11; Propionamide(C) @ 23; Label: 13C(6)15N(4)(R) @ 28                                                                 | 0.0293649   | 3171.69141 | 793.9301 | 3171.66187 | 793.92273  | 4 | 12 | 19.733  | 20.90 |
| 16 | 48.74 | 50.75 | 67.3 CAMK2B_FlexIII | 99.0 STVASMMHR                   | Label: 13C(6)15N(4)(R) @ 9                                                                                                                                        | -0.00024067 | 1028.47693 | 515.2457 | 1028.47705 | 515.24585  | 2 | 10 | 15.1449 | 20.90 |
| 16 | 48.74 | 50.75 | 67.3 CAMK2B_FlexIII | 99.0 TTEQLIEAVNNGDFEAYAK         | Deamidated(N) @ 11; Label: 13C(6)15N(2)(K) @ 19                                                                                                                   | -0.0135449  | 2120.98535 | 1061.5   | 2120.99927 | 1061.50696 | 2 | 23 | 18.2001 | 20.90 |
| 16 | 48.74 | 50.75 | 67.3 CAMK2B_FlexIII | 99.0 TTEQLIEAVNNGDFEAYAK         | Deamidated(N) @ 11; Label: 13C(6)15N(2)(K) @ 19                                                                                                                   | 0.00899005  | 2121.0083  | 708.0101 | 2120.99927 | 708.00708  | 3 | 20 | 18.2023 | 20.90 |
| 16 | 48.74 | 50.75 | 67.3 CAMK2B_FlexIII | 99.0 TTEQLIEAVNNGDFEAYAK         | Deamidated(N) @ 11; Label: 13C(6)15N(2)(K) @ 19                                                                                                                   | 0.00793951  | 2121.00732 | 1061.511 | 2120.99927 | 1061.50696 | 2 | 23 | 18.4765 | 20.90 |
| 16 | 48.74 | 50.75 | 67.3 CAMK2B_FlexIII | 99.0 TTEQLIEAVNNGDFEAYAK         | Deamidated(N) @ 11; Label: 13C(6)15N(2)(K) @ 19                                                                                                                   | 0.00899005  | 2121.0083  | 708.0101 | 2120.99927 | 708.00708  | 3 | 18 | 18.7121 | 20.90 |
| 16 | 48.74 | 50.75 | 67.3 CAMK2B_FlexIII | 99.0 TTEQLIEAVNNGDFEAYAK         | Deamidated(O) @ 4; Label: 13C(6)15N(2)(K) @ 19                                                                                                                    | 0.00647467  | 2121.00537 | 1061.51  | 2120.99927 | 1061.50696 | 2 | 17 | 18.7471 | 20.90 |
| 16 | 48.74 | 50.75 | 67.3 CAMK2B_FlexIII | 99.0 TTEQLIEAVNNGDFEAYAK         | Deamidated(N) @ 11; Label: 13C(6)15N(2)(K) @ 19                                                                                                                   | 0.00647467  | 2121.00537 | 1061.51  | 2120.99927 | 1061.50696 | 2 | 22 | 19.0291 | 20.90 |
| 16 | 48.74 | 50.75 | 67.3 CAMK2B_FlexIII | 99.0 TTEQLIEAVNNGDFEAYAK         | Label: 13C(6)15N(2)(K) @ 19                                                                                                                                       | 0.00716542  | 2120.02271 | 707.6815 | 2120.01538 | 707.679077 | 3 | 16 | 26.4328 | 20.90 |
| 16 | 48.74 | 50.75 | 67.3 CAMK2B_FlexIII | 99.0 TTEQLIEAVNNGDFEAYAK         | Deamidated(N) @ 10; Label: 13C(6)15N(2)(K) @ 19                                                                                                                   | 0.00647467  | 2121.00537 | 1061.51  | 2120.99927 | 1061.50696 | 2 | 16 | 26.47   | 20.90 |
| 16 | 48.74 | 50.75 | 67.3 CAMK2B_FlexIII | 99.0 TTEQLIEAVNNGDFEAYAK         | Label: 13C(6)15N(2)(K) @ 19                                                                                                                                       | -0.0102179  | 2120.00537 | 1061.01  | 2120.01538 | 1061.01489 | 2 | 22 | 18.8198 | 20.90 |
| 16 | 48.74 | 50.75 | 67.3 CAMK2B_FlexIII | 99.0 TTEQLIEAVNNGDFEAYAK         | Deamidated(N) @ 10; Label: 13C(6)15N(2)(K) @ 19                                                                                                                   | 0.00861997  | 2121.00781 | 708.0099 | 2120.99927 | 708.00708  | 3 | 16 | 18.8049 | 20.90 |
| 16 | 48.74 | 50.75 | 67.3 CAMK2B_FlexIII | 99.0 YPTFLYK                     | Label: 13C(6)15N(2)(K) @ 7                                                                                                                                        | -0.00165037 | 938.497681 | 470.2561 | 938.499329 | 470.256928 | 2 | 9  | 18.0092 | 20.90 |
| 16 | 48.74 | 50.75 | 67.3 CAMK2B_FlexIII | 99.0 YPTFLYK                     | Label: 13C(6)15N(2)(K) @ 7                                                                                                                                        | 0.00020099  | 938.499451 | 470.257  | 938.499329 | 470.256928 | 2 | 9  | 17.9008 | 20.90 |
| 16 | 48.74 | 50.75 | 67.3 CAMK2B_FlexIII | 99.0 YPTFLYK                     | Label: 13C(6)15N(2)(K) @ 7                                                                                                                                        | -0.00091407 | 938.498474 | 470.2565 | 938.499329 | 470.256928 | 2 | 9  | 17.7612 | 20.90 |
| 17 | 48.68 | 50.69 | 56.7 PRKACG_FlexIII | 99.0 ARGDFLYR                    | Label: 13C(6)15N(4)(R) @ 2; Label: 13C(6)15N(4)(R) @ 8                                                                                                            | -4.53E-05   | 1016.5307  | 509.2726 | 1016.53064 | 509.272614 | 2 | 12 | 15.8122 | 16.57 |
| 17 | 48.68 | 50.69 | 56.7 PRKACG_FlexIII | 99.0 DLKPNLLIDQQGYLQVTDGFGAK     | Label: 13C(6)15N(2)(K) @ 3; Deamidated(Q) @ 12; Label: 13C(6)15N(2)(K) @ 24                                                                                       | 0.00697854  | 2768.4314  | 1385.223 | 2768.42432 | 1385.21948 | 2 | 17 | 20.0382 | 16.57 |
| 17 | 48.68 | 50.69 | 56.7 PRKACG_FlexIII | 99.0 DLKPNLLIDQQGYLQVTDGFGAKR    | Label: 13C(6)15N(2)(K) @ 3; Label: 13C(6)15N(2)(K) @ 24; Label: 13C(6)15N(4)(R) @ 25                                                                              | 0.0138617   | 2933.56372 | 978.8618 | 2933.54981 | 978.857178 | 3 | 18 | 19.5616 | 16.57 |
| 17 | 48.68 | 50.69 | 56.7 PRKACG_FlexIII | 99.0 DTEOEESVNEFLAK              | Label: 13C(6)15N(2)(K) @ 14                                                                                                                                       | -0.00804417 | 1645.74829 | 823.8814 | 1645.75623 | 823.885376 | 2 | 15 | 17.999  | 16.57 |
| 17 | 48.68 | 50.69 | 56.7 PRKACG_FlexIII | 99.0 EFSEFYPTFLYK                |                                                                                                                                                                   | 0.00885185  | 1569.74805 | 785.8813 | 1569.73914 | 785.876831 | 2 | 13 | 19.8548 | 16.57 |
| 17 | 48.68 | 50.69 | 56.7 PRKACG_FlexIII | 99.0 FSEPHACFYAAQVVLAVQYHSLDLIHR | Propionamide(C) @ 7; Deamidated(Q) @ 12; Label: 13C(6)15N(4)(R) @ 28                                                                                              | 0.00016694  | 3308.66821 | 662.7409 | 3308.66797 | 662.740906 | 5 | 14 | 20.6168 | 16.57 |
| 17 | 48.68 | 50.69 | 56.7 PRKACG_FlexIII | 99.0 GRTWTLCGTPEYLAPEILSK        | Label: 13C(6)15N(4)(R) @ 2; Propionamide(C) @ 7; Label: 13C(6)15N(2)(K) @ 21                                                                                      | -0.00310932 | 2436.25293 | 813.0916 | 2436.28418 | 813.10199  | 3 | 16 | 19.6292 | 16.57 |
| 17 | 48.68 | 50.69 | 56.7 PRKACG_FlexIII | 99.0 HQETGGHYAMK                 | Label: 13C(6)15N(2)(K) @ 11                                                                                                                                       | 3.44E-05    | 1265.57019 | 422.864  | 1265.57031 | 422.864014 | 3 | 12 | 9.046   | 16.57 |
| 17 | 48.68 | 50.69 | 56.7 PRKACG_FlexIII | 99.0 ILQAIDFPFLVK                | Label: 13C(6)15N(2)(K) @ 12                                                                                                                                       | -0.00313753 | 1410.8335  | 706.424  | 1410.83667 | 706.425598 | 2 | 13 | 20.4425 | 16.57 |
| 17 |       |       |                     |                                  |                                                                                                                                                                   |             |            |          |            |            |   |    |         |       |

|    |       |       |                     |                                                            |                                                                                                                                                                   |                                 |             |            |          |            |            |   |    |         |       |
|----|-------|-------|---------------------|------------------------------------------------------------|-------------------------------------------------------------------------------------------------------------------------------------------------------------------|---------------------------------|-------------|------------|----------|------------|------------|---|----|---------|-------|
| 17 | 48.68 | 50.69 | 56.7 PRKACG_FlexIII | 99.0 WFATTSWIAIYEK                                         | Label: 13C(6)15N(2)(K) @ 13                                                                                                                                       |                                 | 0.00567722  | 1622.82813 | 812.4213 | 1622.82239 | 812.418518 | 2 | 12 | 26.461  | 16.57 |
| 17 | 48.68 | 50.69 | 56.7 PRKACG_FlexIII | 99.0 WGNPAQNTASSDQFER                                      |                                                                                                                                                                   |                                 | 0.00292081  | 1806.79504 | 904.4048 | 1806.79211 | 904.40332  | 2 | 23 | 16.3424 | 16.57 |
| 17 | 48.68 | 50.69 | 56.7 PRKACG_FlexIII | 99.0 YTGPGDASNFDDYEEELR                                    | Label: 13C(6)15N(4)(R) @ 19                                                                                                                                       |                                 | -0.00408661 | 2215.90161 | 739.6412 | 2215.90576 | 739.642517 | 3 | 21 | 17.5155 | 16.57 |
| 17 | 48.68 | 50.69 | 56.7 PRKACG_FlexIII | 99.0 YTGPGDASNFDDYEEELRISINEK                              | Deamidated(N) @ 9; Label: 13C(6)15N(4)(R) @ 19; Label: 13C(6)15N(2)(K) @ 25                                                                                       | missed R-I @ 19                 | 0.00904483  | 2909.29346 | 970.7718 | 2909.28467 | 970.768799 | 3 | 13 | 18.2312 | 16.57 |
| 17 | 48.68 | 50.69 | 56.7 PRKACG_FlexIII | 99.0 FSEPHACFYAAQVVLAVQYHSLDLIHRDLKPENLLIDQQGYLOVTFDGFQAKR | Propionamide(C) @ 7; Label: 13C(6)15N(4)(R) @ 28; Label: 13C(6)15N(2)(K) @ 31; Deamidated(N) @ 34; Label: 13C(6)15N(2)(K) @ 52; missed R-D @ 28; missed K-R @ 52  |                                 | 0.0411375   | 6224.24805 | 1038.382 | 6224.20703 | 1038.37512 | 6 | 12 | 20.439  | 16.57 |
| 17 | 48.68 | 50.69 | 56.7 PRKACG_FlexIII | 99.0 ARGDFLYR                                              | Label: 13C(6)15N(4)(R) @ 2; Label: 13C(6)15N(4)(R) @ 8                                                                                                            | missed R-G @ 2                  | -0.00245303 | 1016.5282  | 339.85   | 1016.53064 | 339.85083  | 3 | 9  | 16.049  | 16.57 |
| 17 | 48.68 | 50.69 | 56.7 PRKACG_FlexIII | 99.0 ARGDFLYR                                              | Label: 13C(6)15N(4)(R) @ 2; Label: 13C(6)15N(4)(R) @ 8                                                                                                            | missed R-G @ 2                  | 0.00056506  | 1016.53125 | 509.2729 | 1016.53064 | 509.272614 | 2 | 10 | 16.0789 | 16.57 |
| 17 | 48.68 | 50.69 | 56.7 PRKACG_FlexIII | 99.0 DLKPENLLIDQQGYLOVTFDGFQAK                             | Label: 13C(6)15N(2)(K) @ 3; Deamidated(Q) @ 12; Label: 13C(6)15N(2)(K) @ 24                                                                                       |                                 | 0.0188226   | 2768.44336 | 923.8217 | 2768.42432 | 923.815369 | 3 | 21 | 19.9813 | 16.57 |
| 17 | 48.68 | 50.69 | 56.7 PRKACG_FlexIII | 99.0 DLKPENLLIDQQGYLOVTFDGFQAKR                            | Label: 13C(6)15N(2)(K) @ 3; Deamidated(Q) @ 12; Label: 13C(6)15N(2)(K) @ 24; Label: 13C(6)15N(4)(R) @ 25                                                          | missed K-R @ 24                 | 0.00171486  | 2934.5354  | 734.6411 | 2934.53369 | 734.640686 | 4 | 17 | 19.6441 | 16.57 |
| 17 | 48.68 | 50.69 | 56.7 PRKACG_FlexIII | 99.0 DTEQESVNEFLAK                                         | Label: 13C(6)15N(2)(K) @ 14                                                                                                                                       |                                 | 0.00269805  | 1645.75903 | 823.8868 | 1645.75623 | 823.885372 | 2 | 16 | 17.7307 | 16.57 |
| 17 | 48.68 | 50.69 | 56.7 PRKACG_FlexIII | 99.0 DTEQESVNEFLAK                                         | Label: 13C(6)15N(2)(K) @ 14                                                                                                                                       |                                 | 0.00294535  | 1645.75928 | 549.5937 | 1645.75623 | 549.592712 | 3 | 13 | 17.7765 | 16.57 |
| 17 | 48.68 | 50.69 | 56.7 PRKACG_FlexIII | 99.0 DTEQESVNEFLAK                                         | Deamidated(Q) @ 4; Label: 13C(6)15N(2)(K) @ 14                                                                                                                    |                                 | 0.0279627   | 1646.76831 | 824.3914 | 1646.74023 | 824.377441 | 2 | 11 | 21.4766 | 16.57 |
| 17 | 48.68 | 50.69 | 56.7 PRKACG_FlexIII | 99.0 EFSEFYPTFLYK                                          | Label: 13C(6)15N(2)(K) @ 12                                                                                                                                       |                                 | -0.00215053 | 1577.75122 | 789.8829 | 1577.7533  | 789.883972 | 2 | 13 | 20.0248 | 16.57 |
| 17 | 48.68 | 50.69 | 56.7 PRKACG_FlexIII | 99.0 EFSEFYPTFLYK                                          | Label: 13C(6)15N(2)(K) @ 12                                                                                                                                       |                                 | -0.013622   | 1577.73962 | 526.9205 | 1577.7533  | 526.925049 | 3 | 12 | 19.9009 | 16.57 |
| 17 | 48.68 | 50.69 | 56.7 PRKACG_FlexIII | 99.0 EFSEFYPTFLYK                                          | Label: 13C(6)15N(2)(K) @ 12                                                                                                                                       |                                 | -0.00215053 | 1577.75122 | 789.8829 | 1577.7533  | 789.883972 | 2 | 12 | 19.7614 | 16.57 |
| 17 | 48.68 | 50.69 | 56.7 PRKACG_FlexIII | 99.0 HQETGGHYAMK                                           | Label: 13C(6)15N(2)(K) @ 11                                                                                                                                       |                                 | 3.44E-05    | 1265.57019 | 422.864  | 1265.57031 | 422.864014 | 3 | 11 | 8.7789  | 16.57 |
| 17 | 48.68 | 50.69 | 56.7 PRKACG_FlexIII | 99.0 HQETGGHYAMK                                           | Label: 13C(6)15N(2)(K) @ 11                                                                                                                                       |                                 | 0.00067531  | 1265.57105 | 422.8643 | 1265.57031 | 422.864014 | 3 | 10 | 9.3183  | 16.57 |
| 17 | 48.68 | 50.69 | 56.7 PRKACG_FlexIII | 99.0 KVEAPFIPK                                             | Label: 13C(6)15N(2)(K) @ 1; Label: 13C(6)15N(2)(K) @ 9                                                                                                            | missed K-V @ 1                  | -0.017228   | 1043.61792 | 348.8799 | 1043.63501 | 348.88562  | 3 | 9  | 16.74   | 16.57 |
| 17 | 48.68 | 50.69 | 56.7 PRKACG_FlexIII | 99.0 KVEAPFIPK                                             | Label: 13C(6)15N(2)(K) @ 1; Label: 13C(6)15N(2)(K) @ 9                                                                                                            | missed K-V @ 1                  | 0.00028247  | 1043.6355  | 522.825  | 1043.63501 | 522.824768 | 2 | 11 | 16.4487 | 16.57 |
| 17 | 48.68 | 50.69 | 56.7 PRKACG_FlexIII | 99.0 KVEAPFIPK                                             | Label: 13C(6)15N(2)(K) @ 1; Label: 13C(6)15N(2)(K) @ 9                                                                                                            | missed K-V @ 1                  | -0.0025795  | 1043.63257 | 348.8848 | 1043.63501 | 348.88562  | 3 | 9  | 16.4803 | 16.57 |
| 17 | 48.68 | 50.69 | 56.7 PRKACG_FlexIII | 99.0 KVEAPFIPK                                             | Label: 13C(6)15N(2)(K) @ 1; Label: 13C(6)15N(2)(K) @ 9                                                                                                            | missed K-V @ 1                  | -0.00264406 | 1043.63232 | 348.8847 | 1043.63501 | 348.88562  | 3 | 10 | 16.7103 | 16.57 |
| 17 | 48.68 | 50.69 | 56.7 PRKACG_FlexIII | 99.0 KVEAPFIPK                                             | Label: 13C(6)15N(2)(K) @ 1; Label: 13C(6)15N(2)(K) @ 9                                                                                                            | missed K-V @ 1                  | -0.00851007 | 1043.62671 | 522.8206 | 1043.63501 | 522.824768 | 2 | 10 | 16.7388 | 16.57 |
| 17 | 48.68 | 50.69 | 56.7 PRKACG_FlexIII | 99.0 KVEAPFIPK                                             | Label: 13C(6)15N(2)(K) @ 1; Label: 13C(6)15N(2)(K) @ 9                                                                                                            | missed K-V @ 1                  | -0.00117922 | 1043.63379 | 348.8852 | 1043.63501 | 348.88562  | 3 | 9  | 16.4314 | 16.57 |
| 17 | 48.68 | 50.69 | 56.7 PRKACG_FlexIII | 99.0 KVEAPFIPK                                             | Label: 13C(6)15N(2)(K) @ 1; Label: 13C(6)15N(2)(K) @ 9                                                                                                            | missed K-V @ 1                  | -0.00851007 | 1043.62671 | 522.8206 | 1043.63501 | 522.824768 | 2 | 7  | 23.7397 | 16.57 |
| 17 | 48.68 | 50.69 | 56.7 PRKACG_FlexIII | 99.0 MKQVEHILNEK                                           | Label: 13C(6)15N(2)(K) @ 2; Label: 13C(6)15N(2)(K) @ 11                                                                                                           | missed K-Q @ 2                  | -0.00068757 | 1383.75098 | 462.2576 | 1383.75147 | 462.257782 | 3 | 14 | 14.9023 | 16.57 |
| 17 | 48.68 | 50.69 | 56.7 PRKACG_FlexIII | 99.0 MKQVEHILNEKR                                          | Label: 13C(6)15N(2)(K) @ 2; Label: 13C(6)15N(2)(K) @ 11; Label: 13C(6)15N(4)(R) @ 12                                                                              | missed K-Q @ 2; missed K-R @ 11 | 0.00881298  | 1549.86963 | 517.6305 | 1549.86084 | 517.627564 | 3 | 14 | 14.3906 | 16.57 |
| 17 | 48.68 | 50.69 | 56.7 PRKACG_FlexIII | 99.0 MKQVEHILNEKR                                          | Label: 13C(6)15N(2)(K) @ 2; Label: 13C(6)15N(2)(K) @ 11; Label: 13C(6)15N(4)(R) @ 12                                                                              | missed K-Q @ 2; missed K-R @ 11 | -0.00943343 | 1549.85181 | 388.4702 | 1549.86084 | 388.472504 | 4 | 10 | 14.6546 | 16.57 |
| 17 | 48.68 | 50.69 | 56.7 PRKACG_FlexIII | 99.0 QVEHILNEK                                             | Gln->pyro-Glu @ N-term; Label: 13C(6)15N(2)(K) @ 9                                                                                                                |                                 | -0.00126728 | 1099.5741  | 550.7943 | 1099.57532 | 550.794922 | 2 | 13 | 16.7373 | 16.57 |
| 17 | 48.68 | 50.69 | 56.7 PRKACG_FlexIII | 99.0 QVEHILNEKR                                            | Gln->pyro-Glu @ N-term; Label: 13C(6)15N(2)(K) @ 9; Label: 13C(6)15N(4)(R) @ 10                                                                                   | missed K-R @ 9                  | -0.00583221 | 1265.67883 | 422.9002 | 1265.68469 | 422.902191 | 3 | 11 | 16.0294 | 16.57 |
| 17 | 48.68 | 50.69 | 56.7 PRKACG_FlexIII | 99.0 TLGMSGFGR                                             | Label: 13C(6)15N(4)(R) @ 9                                                                                                                                        |                                 | -0.0002407  | 934.456848 | 468.2357 | 934.457031 | 468.235779 | 2 | 10 | 17.0583 | 16.57 |
| 17 | 48.68 | 50.69 | 56.7 PRKACG_FlexIII | 99.0 TLGMSGFGR                                             |                                                                                                                                                                   |                                 | -0.00078934 | 924.448059 | 463.2313 | 924.448731 | 463.231659 | 2 | 10 | 17.1295 | 16.57 |
| 17 | 48.68 | 50.69 | 56.7 PRKACG_FlexIII | 99.0 TWTLCGTPEYLAPEILSK                                    | Propionamide(C) @ 5; Label: 13C(6)15N(2)(K) @ 19                                                                                                                  |                                 | 0.0008786   | 2213.15332 | 1107.584 | 2213.15332 | 1107.58398 | 2 | 18 | 20.5143 | 16.57 |
| 17 | 48.68 | 50.69 | 56.7 PRKACG_FlexIII | 99.0 VGRFSEPHACFYAAQVVLAVQYHSLDLIHR                        | Label: 13C(6)15N(4)(R) @ 3; Propionamide(C) @ 10; Deamidated(Q) @ 15; Label: 13C(6)15N(4)(R) @ 31                                                                 | missed R-F @ 3                  | 0.00183758  | 3630.86914 | 727.1811 | 3630.86719 | 727.180725 | 5 | 13 | 20.2901 | 16.57 |
| 17 | 48.68 | 50.69 | 56.7 PRKACG_FlexIII | 99.0 WFATTSWIAIYEK                                         | Label: 13C(6)15N(2)(K) @ 13                                                                                                                                       |                                 | -0.00848298 | 1622.81384 | 812.4142 | 1622.82239 | 812.418518 | 2 | 13 | 20.1858 | 16.57 |
| 17 | 48.68 | 50.69 | 56.7 PRKACG_FlexIII | 99.0 WGNPAQNTASSDQFER                                      | Label: 13C(6)15N(4)(R) @ 16                                                                                                                                       |                                 | 0.0082302   | 1816.80872 | 909.4116 | 1816.80042 | 909.407471 | 2 | 21 | 16.2019 | 16.57 |
| 17 | 48.68 | 50.69 | 56.7 PRKACG_FlexIII | 99.0 WGNPAQNTASSDQFER                                      | Label: 13C(6)15N(4)(R) @ 16                                                                                                                                       |                                 | 0.0100034   | 1816.8103  | 606.6107 | 1816.80042 | 606.607422 | 3 | 17 | 16.2846 | 16.57 |
| 17 | 48.68 | 50.69 | 56.7 PRKACG_FlexIII | 99.0 WGNPAQNTASSDQFER                                      | Label: 13C(6)15N(4)(R) @ 16                                                                                                                                       |                                 | 0.00102803  | 1816.80151 | 909.408  | 1816.80042 | 909.407471 | 2 | 21 | 16.466  | 16.57 |
| 17 | 48.68 | 50.69 | 56.7 PRKACG_FlexIII | 99.0 YPTFLYK                                               | Label: 13C(6)15N(2)(K) @ 7                                                                                                                                        | cleaved F-Y @ N-term            | -0.00165037 | 938.497681 | 470.2561 | 938.499329 | 470.256928 | 2 | 9  | 18.0092 | 16.57 |
| 17 | 48.68 | 50.69 | 56.7 PRKACG_FlexIII | 99.0 YPTFLYK                                               | Label: 13C(6)15N(2)(K) @ 7                                                                                                                                        | cleaved F-Y @ N-term            | 0.00020099  | 938.499451 | 470.257  | 938.499329 | 470.256928 | 2 | 9  | 17.9008 | 16.57 |
| 17 | 48.68 | 50.69 | 56.7 PRKACG_FlexIII | 99.0 YPTFLYK                                               | Label: 13C(6)15N(2)(K) @ 7                                                                                                                                        | cleaved F-Y @ N-term            | -0.0091407  | 938.498474 | 470.2565 | 938.499329 | 470.256928 | 2 | 9  | 17.7612 | 16.57 |
| 17 | 48.68 | 50.69 | 56.7 PRKACG_FlexIII | 99.0 YTGPGDASNFDDYEEELR                                    | Label: 13C(6)15N(4)(R) @ 19                                                                                                                                       |                                 | 0.00402793  | 2215.90942 | 1108.962 | 2215.90576 | 1108.96008 | 2 | 22 | 17.4636 | 16.57 |
| 17 | 48.68 | 50.69 | 56.7 PRKACG_FlexIII | 99.0 YTGPGDASNFDDYEEELR                                    | Label: 13C(6)15N(4)(R) @ 19                                                                                                                                       |                                 | -0.00134318 | 2215.90332 | 1108.959 | 2215.90576 | 1108.96008 | 2 | 19 | 17.7216 | 16.57 |
| 18 | 48.12 | 50.3  | 76.2 EVL_FlexIII    | 99.0 AASOPPNSSSEAGR                                        | Label: 13C(6)15N(4)(R) @ 16                                                                                                                                       |                                 | -0.00543413 | 1270.58484 | 636.2997 | 1270.59021 | 636.302368 | 2 | 11 | 8.4478  | 16.66 |
| 18 | 48.12 | 50.3  | 76.2 EVL_FlexIII    | 99.0 AASOSDKPAEKKEDESQMEDPSTSPSPGTR                        | Label: 13C(6)15N(2)(K) @ 7; Label: 13C(6)15N(2)(K) @ 11; Label: 13C(6)15N(2)(K) @ 12; Deamidated(Q) @ 17; Label: 13C(6)15N(4)(R) missed K-K @ 11; missed K-E @ 12 |                                 | 0.0161678   | 3224.48779 | 807.1292 | 3224.47168 | 807.125183 | 4 | 16 | 13.8658 | 16.66 |
| 18 | 48.12 | 50.3  | 76.2 EVL_FlexIII    | 99.0 ASSGGGGGGLMEEMNK                                      | Label: 13C(6)15N(2)(K) @ 16                                                                                                                                       |                                 | -0.00076298 | 1488.64209 | 745.3283 | 1488.64282 | 745.328674 | 2 | 17 | 16.6411 | 16.66 |
| 18 | 48.12 | 50.3  | 76.2 EVL_FlexIII    | 99.0 ASVMVYDDTSK                                           | Label: 13C(6)15N(2)(K) @ 11                                                                                                                                       |                                 | -0.00056165 | 1222.56262 | 612.2886 | 1222.56311 | 612.288818 | 2 | 14 | 15.6666 | 16.66 |
| 18 | 48.12 | 50.3  | 76.2 EVL_FlexIII    | 99.0 ASVMVYDDTSKK                                          | Label: 13C(6)15N(2)(K) @ 11; Label: 13C(6)15N(2)(K) @ 12                                                                                                          | missed K-K @ 11                 | 0.00628405  | 1358.67847 | 453.9001 | 1358.67224 | 453.898041 | 3 | 12 | 15.1835 | 16.66 |
| 18 | 48.12 | 50.3  | 76.2 EVL_FlexIII    | 99.0 EEAATFSNAMFLNIMNSQEGGPSSQR                            | Deamidated(N) @ 15; Label: 13C(6)15N(4)(R) @ 28                                                                                                                   |                                 | 0.00602595  | 3040.38525 | 1014.469 | 3040.37817 | 1014.46668 | 3 | 15 | 20.7762 | 16.66 |
| 18 | 48.12 | 50.3  | 76.2 EVL_FlexIII    | 99.0 INIYHNTASNTRF                                         | Label: 13C(6)15N(4)(R) @ 13                                                                                                                                       |                                 | -0.00793369 | 1559.76404 | 780.8893 | 1559.77197 | 780.893311 | 2 | 14 | 15.9584 | 16.66 |
| 18 | 48.12 | 50.3  | 76.2 EVL_FlexIII    | 99.0 KEDESQMEDPSTSPSPGTR                                   | Label: 13C(6)15N(2)(K) @ 1; Label: 13C(6)15N(4)(R) @ 19                                                                                                           | missed K-E @ 1                  | -0.0104559  | 2094.90332 | 1048.459 | 2094.91309 | 1048.46387 | 2 | 26 | 14.0896 | 16.66 |
| 18 | 48.12 | 50.3  | 76.2 EVL_FlexIII    | 99.0 KWVPKPGQQGFSR                                         | Label: 13C(6)15N(2)(K) @ 1; Label: 13C(6)15N(2)(K) @ 6; Label: 13C(6)15N(4)(R) @ 14                                                                               | missed K-W @ 1                  | -0.00432401 | 1652.93176 | 414.2402 | 1652.93616 | 414.241303 | 4 | 13 | 15.9333 | 16.66 |
| 18 | 48.12 | 50.3  | 76.2 EVL_FlexIII    | 99.0 LQDDQVINYIVK                                          | -5-15E-05                                                                                                                                                         |                                 | -5-15E-05   | 1645.90393 | 823.9592 | 1645.90393 | 823.959229 | 2 | 16 | 17.9386 | 16.66 |
| 18 | 48.12 | 50.3  | 76.2 EVL_FlexIII    | 99.0 MKPAGSVNMDALDAFDLDR                                   | Label: 13C(6)15N(2)(K) @ 2; Label: 13C(6)15N(4)(R) @ 19                                                                                                           |                                 | -0.00061605 | 2082.9834  | 1042.499 | 2082.9834  | 1042.4989  | 2 | 24 | 18.7527 | 16.66 |
| 18 | 48.12 | 50.3  | 76.2 EVL_FlexIII    | 99.0 MKQEILEEVVR                                           | Label: 13C(6)15N(2)(K) @ 2; Label: 13C(6)15N(4)(R) @ 11                                                                                                           | missed K-Q @ 2                  | 0.00042761  | 1390.76123 | 696.3879 | 1390.76086 | 696.387756 | 2 | 13 | 17.2852 | 16.66 |
| 18 | 48.12 | 50.3  | 76.2 EVL_FlexIII    | 99.0 QVMEQHQQQR                                            | Gln->pyro-Glu @ N-term                                                                                                                                            |                                 | 0.00116419  | 1293.58972 | 647.8021 | 1293.58838 | 647.801514 | 2 | 16 | 13.7762 | 16.66 |
| 18 | 48.12 | 50.3  | 76.2 EVL_FlexIII    | 99.0 QVQNGPSPDEMDIQR                                       | Gln->pyro-Glu @ N-term; Label: 13C(6)15N(4)(R) @ 15                                                                                                               |                                 | -0.00719019 | 1705.7533  | 853.8839 | 1705.7605  | 853.887512 | 2 | 15 | 16.9229 | 16.66 |
| 18 | 48.12 | 50.3  | 76.2 EVL_FlexIII    | 99.0 QVQNGPSPDEMDIQR                                       | Label: 13C(6)15N(4)(R) @ 15; Label: 13C(6)15N(4)(R) @ 16                                                                                                          |                                 |             |            |          |            |            |   |    |         |       |

|    |       |      |                  |                                     |                                                                                                                                                                   |             |            |          |            |            |   |    |         |       |
|----|-------|------|------------------|-------------------------------------|-------------------------------------------------------------------------------------------------------------------------------------------------------------------|-------------|------------|----------|------------|------------|---|----|---------|-------|
| 18 | 48.12 | 50.3 | 76.2 EVL_FlexIil | 99.0 AASOPPNSEAGR                   | Label: 13C(6)15N(4)(R) @ 13                                                                                                                                       | -0.00054493 | 1280.5979  | 641.3062 | 1280.59851 | 641.306519 | 2 | 13 | 8.6784  | 16.66 |
| 18 | 48.12 | 50.3 | 76.2 EVL_FlexIil | 99.0 AASOPPNSEAGR                   | Label: 13C(6)15N(4)(R) @ 13                                                                                                                                       | 0.00629099  | 1280.60461 | 641.3096 | 1280.59851 | 641.306519 | 2 | 13 | 8.9448  | 16.66 |
| 18 | 48.12 | 50.3 | 76.2 EVL_FlexIil | 99.0 AASOPPNSEAGR                   | Deamidated(N) @ 7; Label: 13C(6)15N(4)(R) @ 13                                                                                                                    | -0.00153079 | 1281.58093 | 641.7977 | 1281.58252 | 641.798523 | 2 | 13 | 9.2137  | 16.66 |
| 18 | 48.12 | 50.3 | 76.2 EVL_FlexIil | 99.0 AASOPPNSEAGR                   | Deamidated(N) @ 7; Label: 13C(6)15N(4)(R) @ 13                                                                                                                    | -0.00031009 | 1281.58203 | 641.7983 | 1281.58252 | 641.798523 | 2 | 12 | 9.496   | 16.66 |
| 18 | 48.12 | 50.3 | 76.2 EVL_FlexIil | 99.0 AASOSDKPAEKKEDESQMEDPSTSPSPGTR | Label: 13C(6)15N(2)(K) @ 7; Label: 13C(6)15N(2)(K) @ 11; Label: 13C(6)15N(2)(K) @ 12; Deamidated(Q) @ 17; Label: 13C(6)15N(4)(R) missed K-K @ 11; missed K-E @ 12 | 0.0220362   | 3224.49512 | 1075.839 | 3224.47168 | 1075.83118 | 3 | 18 | 13.7395 | 16.66 |
| 18 | 48.12 | 50.3 | 76.2 EVL_FlexIil | 99.0 AASOSDKPAEKKEDESQMEDPSTSPSPGTR | Label: 13C(6)15N(2)(K) @ 7; Label: 13C(6)15N(2)(K) @ 11; Label: 13C(6)15N(2)(K) @ 12; Deamidated(Q) @ 17; Label: 13C(6)15N(4)(R) missed K-K @ 11; missed K-E @ 12 | 0.0161678   | 3224.48779 | 807.1292 | 3224.47168 | 807.125183 | 4 | 14 | 13.5972 | 16.66 |
| 18 | 48.12 | 50.3 | 76.2 EVL_FlexIil | 99.0 AASOSDKPAEKKEDESQMEDPSTSPSPGTR | Label: 13C(6)15N(2)(K) @ 7; Label: 13C(6)15N(2)(K) @ 11; Label: 13C(6)15N(2)(K) @ 12; Label: 13C(6)15N(4)(R) @ 30                                                 | -0.025763   | 3223.46143 | 645.6996 | 3223.48755 | 645.704834 | 5 | 11 | 13.6074 | 16.66 |
| 18 | 48.12 | 50.3 | 76.2 EVL_FlexIil | 99.0 ASSGGGGGGLMEEMNK               | Label: 13C(6)15N(2)(K) @ 16                                                                                                                                       | 0.00143428  | 1488.64429 | 745.3294 | 1488.64282 | 745.328674 | 2 | 16 | 16.38   | 16.66 |
| 18 | 48.12 | 50.3 | 76.2 EVL_FlexIil | 99.0 ASVMVYDDTSK                    | Label: 13C(6)15N(2)(K) @ 11                                                                                                                                       | -0.0027589  | 1222.56043 | 612.2875 | 1222.56311 | 612.288818 | 2 | 11 | 15.9275 | 16.66 |
| 18 | 48.12 | 50.3 | 76.2 EVL_FlexIil | 99.0 ASVMVYDDTSKK                   | Label: 13C(6)15N(2)(K) @ 11; Label: 13C(6)15N(2)(K) @ 12                                                                                                          | -0.00765336 | 1358.66467 | 680.3396 | 1358.67224 | 680.343384 | 2 | 12 | 14.8825 | 16.66 |
| 18 | 48.12 | 50.3 | 76.2 EVL_FlexIil | 99.0 ASVMVYDDTSKK                   | Label: 13C(6)15N(2)(K) @ 7; Label: 13C(6)15N(2)(K) @ 11; Label: 13C(6)15N(2)(K) @ 12                                                                              | 0.00033314  | 1358.67249 | 453.8981 | 1358.67224 | 453.898041 | 3 | 12 | 14.9198 | 16.66 |
| 18 | 48.12 | 50.3 | 76.2 EVL_FlexIil | 99.0 ASVMVYDDTSKK                   | Oxidation(M) @ 4; Label: 13C(6)15N(2)(K) @ 11; Label: 13C(6)15N(2)(K) @ 12                                                                                        | 0.00137997  | 1374.66846 | 459.2301 | 1374.66724 | 459.229675 | 3 | 11 | 14.1587 | 16.66 |
| 18 | 48.12 | 50.3 | 76.2 EVL_FlexIil | 99.0 ASVMVYDDTSKK                   | Oxidation(M) @ 4; Label: 13C(6)15N(2)(K) @ 11; Label: 13C(6)15N(2)(K) @ 12                                                                                        | -0.00260874 | 1374.66443 | 688.3395 | 1374.66724 | 688.340881 | 2 | 10 | 14.1685 | 16.66 |
| 18 | 48.12 | 50.3 | 76.2 EVL_FlexIil | 99.0 INIYHNTASNTFR                  | Label: 13C(6)15N(4)(R) @ 13                                                                                                                                       | 0.00206696  | 1559.7738  | 520.9319 | 1559.77197 | 520.931274 | 3 | 13 | 15.9549 | 16.66 |
| 18 | 48.12 | 50.3 | 76.2 EVL_FlexIil | 99.0 INIYHNTASNTFR                  | Label: 13C(6)15N(4)(R) @ 13                                                                                                                                       | 0.00151764  | 1559.77368 | 520.9318 | 1559.77197 | 520.931274 | 3 | 13 | 16.2293 | 16.66 |
| 18 | 48.12 | 50.3 | 76.2 EVL_FlexIil | 99.0 INIYHNTASNTFR                  | Label: 13C(6)15N(4)(R) @ 13                                                                                                                                       | 8.56E-07    | 1559.7721  | 780.8933 | 1559.77197 | 780.893311 | 2 | 13 | 16.2306 | 16.66 |
| 18 | 48.12 | 50.3 | 76.2 EVL_FlexIil | 99.0 INIYHNTASNTFR                  |                                                                                                                                                                   | 0.00036066  | 1549.76404 | 775.8893 | 1549.76379 | 775.88916  | 2 | 11 | 16.0556 | 16.66 |
| 18 | 48.12 | 50.3 | 76.2 EVL_FlexIil | 99.0 INIYHNTASNTFR                  |                                                                                                                                                                   | 0.00273194  | 1549.7666  | 517.5961 | 1549.76379 | 517.595215 | 3 | 11 | 16.0769 | 16.66 |
| 18 | 48.12 | 50.3 | 76.2 EVL_FlexIil | 99.0 KEDESQMEDPSTSPSPGTR            | Label: 13C(6)15N(2)(K) @ 1; Oxidation(M) @ 7; Label: 13C(6)15N(4)(R) @ 19                                                                                         | -0.00084277 | 2110.90723 | 704.643  | 2110.90796 | 704.64325  | 3 | 17 | 13.0751 | 16.66 |
| 18 | 48.12 | 50.3 | 76.2 EVL_FlexIil | 99.0 KEDESQMEDPSTSPSPGTR            | Label: 13C(6)15N(2)(K) @ 1; Label: 13C(6)15N(4)(R) @ 19                                                                                                           | -0.00637567 | 2094.90674 | 699.3095 | 2094.91309 | 699.311646 | 3 | 20 | 14.0427 | 16.66 |
| 18 | 48.12 | 50.3 | 76.2 EVL_FlexIil | 99.0 KEDESQMEDPSTSPSPGTR            | Label: 13C(6)15N(2)(K) @ 1; Label: 13C(6)15N(4)(R) @ 19                                                                                                           | -0.00253046 | 2094.91065 | 699.3108 | 2094.91309 | 699.311646 | 3 | 20 | 14.3108 | 16.66 |
| 18 | 48.12 | 50.3 | 76.2 EVL_FlexIil | 99.0 LQDQQVINYISVK                  | Label: 13C(6)15N(2)(K) @ 14                                                                                                                                       | -0.00133139 | 1653.91687 | 827.9657 | 1653.91809 | 827.966309 | 2 | 18 | 17.8667 | 16.66 |
| 18 | 48.12 | 50.3 | 76.2 EVL_FlexIil | 99.0 LQDQQVINYISVK                  | Label: 13C(6)15N(2)(K) @ 14                                                                                                                                       | 0.00085679  | 1653.91895 | 552.3136 | 1653.91809 | 552.313294 | 3 | 15 | 17.9202 | 16.66 |
| 18 | 48.12 | 50.3 | 76.2 EVL_FlexIil | 99.0 LQDQQVINYISVK                  | Deamidated(Q) @ 5; Label: 13C(6)15N(2)(K) @ 14                                                                                                                    | 0.00171107  | 1654.90393 | 828.4592 | 1654.9021  | 828.458374 | 2 | 16 | 18.133  | 16.66 |
| 18 | 48.12 | 50.3 | 76.2 EVL_FlexIil | 99.0 LQDQQVINYISVK                  | Label: 13C(6)15N(2)(K) @ 14                                                                                                                                       | 0.0056266   | 1653.92383 | 827.9692 | 1653.91809 | 827.966309 | 2 | 13 | 21.616  | 16.66 |
| 18 | 48.12 | 50.3 | 76.2 EVL_FlexIil | 99.0 LQDQQVINYISVK                  | Deamidated(Q) @ 5; Label: 13C(6)15N(2)(K) @ 14                                                                                                                    | 0.0216085   | 1654.92383 | 828.4692 | 1654.9021  | 828.458374 | 2 | 10 | 21.8805 | 16.66 |
| 18 | 48.12 | 50.3 | 76.2 EVL_FlexIil | 99.0 LQDQQVINYISVK                  | Deamidated(Q) @ 5; Label: 13C(6)15N(2)(K) @ 14                                                                                                                    | 0.0216085   | 1654.92383 | 828.4692 | 1654.9021  | 828.458374 | 2 | 11 | 20.9998 | 16.66 |
| 18 | 48.12 | 50.3 | 76.2 EVL_FlexIil | 99.0 LQDQQVINYISVK                  | Deamidated(Q) @ 2; Label: 13C(6)15N(2)(K) @ 14                                                                                                                    | -0.0136649  | 1654.88843 | 828.4515 | 1654.9021  | 828.458374 | 2 | 10 | 17.9318 | 16.66 |
| 18 | 48.12 | 50.3 | 76.2 EVL_FlexIil | 99.0 MKPAGSVNDMALDAFDLDR            | Label: 13C(6)15N(2)(K) @ 2; Deamidated(N) @ 8; Label: 13C(6)15N(4)(R) @ 19                                                                                        | 0.019324    | 2083.98657 | 695.6695 | 2083.96729 | 695.663086 | 3 | 14 | 18.6821 | 16.66 |
| 18 | 48.12 | 50.3 | 76.2 EVL_FlexIil | 99.0 QVMEQHQQQR                     | Gln->pyro-Glu @ N-term; Label: 13C(6)15N(4)(R) @ 10                                                                                                               | -0.00041631 | 1303.59631 | 652.8054 | 1303.59668 | 652.805603 | 2 | 15 | 13.7039 | 16.66 |
| 18 | 48.12 | 50.3 | 76.2 EVL_FlexIil | 99.0 QVMEQHQQQR                     | Gln->pyro-Glu @ N-term; Label: 13C(6)15N(4)(R) @ 10                                                                                                               | 0.00056025  | 1303.59729 | 652.8059 | 1303.59668 | 652.805603 | 2 | 15 | 13.9682 | 16.66 |
| 18 | 48.12 | 50.3 | 76.2 EVL_FlexIil | 99.0 QVMEQHQQQR                     | Label: 13C(6)15N(4)(R) @ 10                                                                                                                                       | -3.13E-05   | 1320.62329 | 661.3189 | 1320.62329 | 661.318909 | 2 | 9  | 7.7272  | 16.66 |
| 18 | 48.12 | 50.3 | 76.2 EVL_FlexIil | 99.0 QVMEQHQQQR                     | Gln->pyro-Glu @ N-term; Oxidation(M) @ 3; Label: 13C(6)15N(4)(R) @ 10                                                                                             | -0.00696834 | 1319.58472 | 660.7996 | 1319.59155 | 660.803101 | 2 | 10 | 12.6164 | 16.66 |
| 18 | 48.12 | 50.3 | 76.2 EVL_FlexIil | 99.0 QVMEQHQQQR                     | Gln->pyro-Glu @ N-term; Oxidation(M) @ 3; Label: 13C(6)15N(4)(R) @ 10                                                                                             | -0.00696834 | 1319.58472 | 660.7996 | 1319.59155 | 660.803101 | 2 | 8  | 12.3656 | 16.66 |
| 18 | 48.12 | 50.3 | 76.2 EVL_FlexIil | 99.0 QVQNGPSPDEMDIQR                | Deamidated(N) @ 4; Label: 13C(6)15N(4)(R) @ 15                                                                                                                    | 0.0125947   | 1723.78369 | 862.8991 | 1723.77112 | 862.892822 | 2 | 13 | 15.9189 | 16.66 |
| 18 | 48.12 | 50.3 | 76.2 EVL_FlexIil | 99.0 QVQNGPSPDEMDIQR                | Gln->pyro-Glu @ N-term; Label: 13C(6)15N(4)(R) @ 15; Label: 13C(6)15N(4)(R) @ 16                                                                                  | -0.00664172 | 1871.86328 | 936.9389 | 1871.86987 | 936.9422   | 2 | 12 | 16.2543 | 16.66 |
| 18 | 48.12 | 50.3 | 76.2 EVL_FlexIil | 99.0 QVYGLNFAK                      | Label: 13C(6)15N(2)(K) @ 10                                                                                                                                       | 3.51E-05    | 1133.59607 | 567.8053 | 1133.59607 | 567.805298 | 2 | 12 | 17.5257 | 16.66 |
| 18 | 48.12 | 50.3 | 76.2 EVL_FlexIil | 99.0 RVQRPEDASGGSSPSGTSK            | Label: 13C(6)15N(4)(R) @ 1; Label: 13C(6)15N(4)(R) @ 4; Label: 13C(6)15N(2)(K) @ 19                                                                               | -0.0127334  | 1929.93689 | 644.3196 | 1929.94983 | 644.323914 | 3 | 13 | 8.5195  | 16.66 |
| 18 | 48.12 | 50.3 | 76.2 EVL_FlexIil | 99.0 RVQRPEDASGGSSPSGTSK            | Label: 13C(6)15N(4)(R) @ 1; Label: 13C(6)15N(4)(R) @ 4; Label: 13C(6)15N(2)(K) @ 19                                                                               | -0.0127334  | 1929.93689 | 644.3196 | 1929.94983 | 644.323914 | 3 | 11 | 8.2539  | 16.66 |
| 18 | 48.12 | 50.3 | 76.2 EVL_FlexIil | 99.0 RVQRPEDASGGSSPSGTSK            | Label: 13C(6)15N(4)(R) @ 1; Label: 13C(6)15N(4)(R) @ 4; Label: 13C(6)15N(2)(K) @ 19                                                                               | -0.018785   | 1929.9314  | 483.4901 | 1929.94983 | 483.494751 | 4 | 10 | 8.0272  | 16.66 |
| 18 | 48.12 | 50.3 | 76.2 EVL_FlexIil | 99.0 RVQRPEDASGGSSPSGTSK            | Label: 13C(6)15N(4)(R) @ 1; Deamidated(Q) @ 3; Label: 13C(6)15N(4)(R) @ 4; Label: 13C(6)15N(2)(K) @ 19                                                            | 0.0231458   | 1930.95703 | 644.6596 | 1930.93384 | 644.651917 | 3 | 9  | 9.0698  | 16.66 |
| 18 | 48.12 | 50.3 | 76.2 EVL_FlexIil | 99.0 SNSVEKPVSSILSR                 | Label: 13C(6)15N(2)(K) @ 6; Label: 13C(6)15N(4)(R) @ 14                                                                                                           | 0.0056531   | 1519.83814 | 507.62   | 1519.83252 | 507.618103 | 3 | 14 | 16.4015 | 16.66 |
| 18 | 48.12 | 50.3 | 76.2 EVL_FlexIil | 99.0 SPLQSOPHSR                     | Label: 13C(6)15N(4)(R) @ 10                                                                                                                                       | 0.00338769  | 1145.58508 | 573.7998 | 1145.58167 | 573.798096 | 2 | 11 | 10.3335 | 16.66 |
| 18 | 48.12 | 50.3 | 76.2 EVL_FlexIil | 99.0 SPLQSOPHSR                     | Label: 13C(6)15N(4)(R) @ 10                                                                                                                                       | 0.00338769  | 1145.58508 | 573.7998 | 1145.58167 | 573.798096 | 2 | 12 | 9.7863  | 16.66 |
| 18 | 48.12 | 50.3 | 76.2 EVL_FlexIil | 99.0 SPLQSOPHSR                     | Label: 13C(6)15N(4)(R) @ 10                                                                                                                                       | -3.03E-05   | 1145.58167 | 573.7981 | 1145.58167 | 573.798096 | 2 | 11 | 9.5258  | 16.66 |
| 18 | 48.12 | 50.3 | 76.2 EVL_FlexIil | 99.0 SPLQSOPHSR                     | Label: 13C(6)15N(4)(R) @ 10                                                                                                                                       | 0.00108979  | 1145.58276 | 382.8682 | 1145.58167 | 382.867828 | 3 | 10 | 9.6803  | 16.66 |
| 18 | 48.12 | 50.3 | 76.2 EVL_FlexIil | 99.0 SPLQSOPHSR                     | Label: 13C(6)15N(4)(R) @ 10                                                                                                                                       | 0.001456    | 1145.58301 | 382.8683 | 1145.58167 | 382.867828 | 3 | 10 | 9.9428  | 16.66 |
| 18 | 48.12 | 50.3 | 76.2 EVL_FlexIil | 99.0 SPLQSOPHSR                     | Deamidated(Q) @ 6; Label: 13C(6)15N(4)(R) @ 10                                                                                                                    | 0.0134401   | 1146.57898 | 383.2003 | 1146.56567 | 383.195831 | 3 | 10 | 11.6992 | 16.66 |
| 18 | 48.12 | 50.3 | 76.2 EVL_FlexIil | 99.0 SPLQSOPHSR                     | Deamidated(Q) @ 4; Label: 13C(6)15N(4)(R) @ 10                                                                                                                    | 0.00172137  | 1146.56738 | 383.1964 | 1146.56567 | 383.195831 | 3 | 10 | 10.4832 | 16.66 |
| 18 | 48.12 | 50.3 | 76.2 EVL_FlexIil | 99.0 SPLQSOPHSR                     | Deamidated(Q) @ 6; Label: 13C(6)15N(4)(R) @ 10                                                                                                                    | 0.00053118  | 1146.56616 | 383.196  | 1146.56567 | 383.195831 | 3 | 10 | 11.4381 | 16.66 |
| 18 | 48.12 | 50.3 | 76.2 EVL_FlexIil | 99.0 SPLQSOPHSR                     | Label: 13C(6)15N(4)(R) @ 10                                                                                                                                       | 0.00026582  | 1145.58179 | 382.8679 | 1145.58167 | 382.867828 | 3 | 9  | 9.4222  | 16.66 |
| 18 | 48.12 | 50.3 | 76.2 EVL_FlexIil | 99.0 VQRPEDASGGSSPSGTSK             | Label: 13C(6)15N(4)(R) @ 3; Label: 13C(6)15N(2)(K) @ 18                                                                                                           | -0.0129157  | 1763.82764 | 588.9498 | 1763.84045 | 588.954102 | 3 | 14 | 7.5811  | 16.66 |
| 18 | 48.12 | 50.3 | 76.2 EVL_FlexIil | 99.0 VQRPEDASGGSSPSGTSK             | Label: 13C(6)15N(4)(R) @ 3; Label: 13C(6)15N(2)(K) @ 18                                                                                                           | -0.0129157  | 1763.82764 | 588.9498 | 1763.84045 | 588.954102 | 3 | 15 | 8.6698  | 16.66 |
| 18 | 48.12 | 50.3 | 76.2 EVL_FlexIil | 99.0 VQRPEDASGGSSPSGTSK             | Label: 13C(6)15N(4)(R) @ 3; Label: 13C(6)15N(2)(K) @ 18                                                                                                           | 0.00302352  | 1763.84351 | 882.929  | 1763.84045 | 882.92749  | 2 | 14 | 8.8746  | 16.66 |
| 18 | 48.12 | 50.3 | 76.2 EVL_FlexIil | 99.0 VQRPEDASGGSSPSGTSK             | Label: 13C(6)15N(4)(R) @ 3; Label: 13C(6)15N(2)(K) @ 18                                                                                                           | -0.0129157  | 1763.82764 | 588.9498 | 1763.84045 | 588.954102 | 3 | 22 | 8.9433  | 16.66 |
| 18 | 48.12 | 50.3 | 76.2 EVL_FlexIil | 99.0 VQRPEDASGGSSPSGTSK             | Label: 13C(6)15N(4)(R) @ 3; Label: 13C(6)15N(2)(K) @ 18                                                                                                           | 0.00302352  | 1763.84351 | 882.929  | 1763.84045 | 882.92749  | 2 | 26 | 9.1341  | 16.66 |
| 18 | 48.12 | 50.3 | 76.2 EVL_FlexIil | 99.0 VQRPEDASGGSSPSGTSK             | Label: 13C(6)15N(4)(R) @ 3; Label: 13C(6)15N(2)(K) @ 18                                                                                                           | 0.00302352  | 1763.84351 | 882.929  | 1763.84045 | 882.92749  | 2 | 17 | 9.4244  | 16.66 |
| 18 | 48.12 | 50.3 | 76.2 EVL_FlexIil | 99.0 VQRPEDASGGSSPSGTSK             | Label: 13C(6)15N(4)(R) @ 3; Label: 13C(6)15N(2)(K) @ 18                                                                                                           | -0.0129157  | 1763.82764 | 588.9498 | 1763.84045 | 588.954102 | 3 | 23 | 9.4681  | 16.66 |
| 18 | 48.12 | 50.3 | 76.2 EVL_FlexIil |                                     |                                                                                                                                                                   |             |            |          |            |            |   |    |         |       |

|    |       |       |                   |                                       |                                                                                                                                        |                                 |             |            |          |            |            |   |    |         |       |
|----|-------|-------|-------------------|---------------------------------------|----------------------------------------------------------------------------------------------------------------------------------------|---------------------------------|-------------|------------|----------|------------|------------|---|----|---------|-------|
| 19 | 47.69 | 49.71 | 41.5 NUF2_FlexII  | 99.0 ESLNLEDOIESDESELK                | Label: 13C(6)15N(2)(K) @ 17                                                                                                            |                                 | 0.00463082  | 1984.92505 | 993.4698 | 1984.92041 | 993.467468 | 2 | 18 | 18.3995 | 8.30  |
| 19 | 47.69 | 49.71 | 41.5 NUF2_FlexII  | 99.0 ESLNLEDOIESDESELKK               | Label: 13C(6)15N(2)(K) @ 17; Label: 13C(6)15N(2)(K) @ 18                                                                               | missed K-K @ 17                 | -0.00484651 | 2121.02539 | 1061.52  | 2121.02954 | 1061.5221  | 2 | 22 | 18.005  | 8.30  |
| 19 | 47.69 | 49.71 | 41.5 NUF2_FlexII  | 99.0 FLSGINFIHFR                      | Label: 13C(6)15N(4)(R) @ 12                                                                                                            |                                 | -0.00332376 | 1472.81348 | 737.414  | 1472.81677 | 737.415649 | 2 | 14 | 20.2154 | 8.30  |
| 19 | 47.69 | 49.71 | 41.5 NUF2_FlexII  | 99.0 KIQDLSDNREK                      | Label: 13C(6)15N(2)(K) @ 1; Label: 13C(6)15N(4)(R) @ 9; Label: 13C(6)15N(2)(K) @ 11                                                    | missed K-I @ 1; missed R-E @ 9  | 0.00617727  | 1370.74268 | 457.9215 | 1370.73645 | 457.919403 | 3 | 10 | 11.4029 | 8.30  |
| 19 | 47.69 | 49.71 | 41.5 NUF2_FlexII  | 99.0 LASILK                           | Label: 13C(6)15N(2)(K) @ 6                                                                                                             |                                 | 0.00250618  | 651.443665 | 326.7291 | 651.441404 | 326.727814 | 2 | 8  | 16.1774 | 8.30  |
| 19 | 47.69 | 49.71 | 41.5 NUF2_FlexII  | 99.0 LDSVPVEEQEEFK                    | Label: 13C(6)15N(2)(K) @ 13                                                                                                            |                                 | -0.00085032 | 1555.7489  | 778.8817 | 1555.74976 | 778.882141 | 2 | 15 | 16.6278 | 8.30  |
| 19 | 47.69 | 49.71 | 41.5 NUF2_FlexII  | 99.0 LDSVPVEEQEKFQSLDGIQELQQSLNQDFHOK | Deamidated(Q) @ 9; Label: 13C(6)15N(2)(K) @ 13; Label: 13C(6)15N(2)(K) @ 33                                                            | missed K-Q @ 13                 | 0.01204     | 3901.89526 | 1301.639 | 3901.88281 | 1301.63489 | 3 | 19 | 20.3844 | 8.30  |
| 19 | 47.69 | 49.71 | 41.5 NUF2_FlexII  | 99.0 LKSOEFLNLK                       | Label: 13C(6)15N(2)(K) @ 2; Label: 13C(6)15N(2)(K) @ 11                                                                                | missed K-S @ 2                  | -0.00269157 | 1347.80713 | 674.9108 | 1347.80969 | 674.912109 | 2 | 15 | 17.7812 | 8.30  |
| 19 | 47.69 | 49.71 | 41.5 NUF2_FlexII  | 99.0 LKTEENSFRK                       | Label: 13C(6)15N(2)(K) @ 2; Label: 13C(6)15N(2)(K) @ 9; Label: 13C(6)15N(4)(R) @ 10                                                    | missed K-T @ 2; missed K-R @ 9  | 0.00536428  | 1276.70398 | 426.5753 | 1276.69861 | 426.573456 | 3 | 10 | 12.82   | 8.30  |
| 19 | 47.69 | 49.71 | 41.5 NUF2_FlexII  | 99.0 MQQLNAAHQEALMK                   | Label: 13C(6)15N(2)(K) @ 14                                                                                                            |                                 | 0.00071086  | 1619.80103 | 810.9078 | 1619.80029 | 810.907471 | 2 | 21 | 15.5714 | 8.30  |
| 19 | 47.69 | 49.71 | 41.5 NUF2_FlexII  | 99.0 QLSDGIQELQQSLNQDFHOK             | Gln->pyro-Glu @ N-term; Label: 13C(6)15N(2)(K) @ 20                                                                                    |                                 | -0.00924129 | 2346.12329 | 1174.069 | 2346.13306 | 1174.07385 | 2 | 21 | 20.1137 | 8.30  |
| 19 | 47.69 | 49.71 | 41.5 NUF2_FlexII  | 99.0 SSADKMQQLNAAHQEALMK              | Label: 13C(6)15N(2)(K) @ 5; Label: 13C(6)15N(2)(K) @ 19                                                                                | missed K-M @ 5                  | -0.00739463 | 2116.03027 | 706.3507 | 2116.0376  | 706.353149 | 3 | 21 | 15.541  | 8.30  |
| 19 | 47.69 | 49.71 | 41.5 NUF2_FlexII  | 99.0 TIVLOEGNSQK                      | Label: 13C(6)15N(2)(K) @ 11                                                                                                            |                                 | -0.00032762 | 1223.65991 | 612.8372 | 1223.66016 | 612.837341 | 2 | 12 | 15.0337 | 8.30  |
| 19 | 47.69 | 49.71 | 41.5 NUF2_FlexII  | 99.0 TIVLOEGNSQKK                     | Deamidated(N) @ 8; Label: 13C(6)15N(2)(K) @ 11; Label: 13C(6)15N(2)(K) @ 12                                                            | missed K-K @ 11                 | 0.00056122  | 1360.75391 | 681.3842 | 1360.7533  | 681.383911 | 2 | 13 | 14.5745 | 8.30  |
| 19 | 47.69 | 49.71 | 41.5 NUF2_FlexII  | 99.0 TSRFLSGIINFHFR                   | Label: 13C(6)15N(4)(R) @ 3; Label: 13C(6)15N(4)(R) @ 15                                                                                | missed R-F @ 3                  | 0.00533022  | 1827.01111 | 610.011  | 1827.00586 | 610.009216 | 3 | 15 | 20.2287 | 8.30  |
| 19 | 47.69 | 49.71 | 41.5 NUF2_FlexII  | 99.0 TVIEDCNKQVEK                     | Propionamide(C) @ 6; Label: 13C(6)15N(2)(K) @ 8; Label: 13C(6)15N(2)(K) @ 12                                                           | missed K-V @ 8                  | 0.00119153  | 1491.75867 | 746.8866 | 1491.75745 | 746.885986 | 2 | 17 | 14.0978 | 8.30  |
| 19 | 47.69 | 49.71 | 41.5 NUF2_FlexII  | 99.0 TVIEDCNKQVEKR                    | Propionamide(C) @ 6; Label: 13C(6)15N(2)(K) @ 8; Label: 13C(6)15N(2)(K) @ 12; Label: 13C(6)15N(4)(R) @ 13                              | missed K-V @ 8; missed K-R @ 12 | -0.00066023 | 1657.86609 | 829.9403 | 1657.86682 | 829.940674 | 2 | 15 | 13.6759 | 8.30  |
| 19 | 47.69 | 49.71 | 41.5 NUF2_FlexII  | 99.0 VDNFETADILCPK                    | Propionamide(C) @ 11; Label: 13C(6)15N(2)(K) @ 13                                                                                      |                                 | -0.00147815 | 1542.74646 | 772.3805 | 1542.74793 | 772.381226 | 2 | 18 | 18.0138 | 8.30  |
| 19 | 47.69 | 49.71 | 41.5 NUF2_FlexII  | 99.0 VTTINQEIQK                       | Label: 13C(6)15N(2)(K) @ 10                                                                                                            |                                 | 0.0008558   | 1180.65503 | 591.3348 | 1180.6543  | 591.334412 | 2 | 10 | 15.3252 | 8.30  |
| 19 | 47.69 | 49.71 | 41.5 NUF2_FlexII  | 99.0 YNVAEIVHFR                       | Label: 13C(6)15N(4)(R) @ 11                                                                                                            |                                 | -0.00076424 | 1335.75305 | 668.8838 | 1335.75378 | 668.884216 | 2 | 14 | 18.6858 | 8.30  |
| 19 | 47.69 | 49.71 | 41.5 NUF2_FlexII  | 99.0 LASILKESLNLEDOIESDESELKK         | Label: 13C(6)15N(2)(K) @ 6; Deamidated(N) @ 10; Label: 13C(6)15N(2)(K) @ 23; Label: 13C(6)15N(2)(K) @ 24                               | missed K-E @ 6; missed K-K @ 23 | 0.00979508  | 2755.45386 | 689.8707 | 2755.44409 | 689.868286 | 4 | 11 | 19.3755 | 8.30  |
| 19 | 47.69 | 49.71 | 41.5 NUF2_FlexII  | 99.0 ESLNLEDOIESDESELKK               | Label: 13C(6)15N(2)(K) @ 17; Label: 13C(6)15N(2)(K) @ 18                                                                               | missed K-K @ 17                 | 0.0107415   | 2121.04028 | 708.0207 | 2121.02954 | 708.017151 | 3 | 16 | 17.9524 | 8.30  |
| 19 | 47.69 | 49.71 | 41.5 NUF2_FlexII  | 99.0 ESLNLEDOIESDESELKK               | Deamidated(N) @ 4; Label: 13C(6)15N(2)(K) @ 17; Label: 13C(6)15N(2)(K) @ 18                                                            | missed K-K @ 17                 | 0.0111349   | 2122.02539 | 1062.02  | 2122.01367 | 1062.01404 | 2 | 16 | 17.9877 | 8.30  |
| 19 | 47.69 | 49.71 | 41.5 NUF2_FlexII  | 99.0 FLSGINFIHFR                      | Label: 13C(6)15N(4)(R) @ 12                                                                                                            |                                 | 0.00194937  | 1472.8186  | 491.9468 | 1472.81677 | 491.946198 | 3 | 13 | 20.1895 | 8.30  |
| 19 | 47.69 | 49.71 | 41.5 NUF2_FlexII  | 99.0 KIQDLSDNREK                      | Label: 13C(6)15N(2)(K) @ 1; Label: 13C(6)15N(4)(R) @ 9; Label: 13C(6)15N(2)(K) @ 11                                                    | missed K-I @ 1; missed R-E @ 9  | 0.00617727  | 1370.74268 | 457.9215 | 1370.73645 | 457.919403 | 3 | 9  | 11.6839 | 8.30  |
| 19 | 47.69 | 49.71 | 41.5 NUF2_FlexII  | 99.0 LKSOEFLNLK                       | Label: 13C(6)15N(2)(K) @ 2; Label: 13C(6)15N(2)(K) @ 11                                                                                | missed K-S @ 2                  | 0.00239844  | 1347.81226 | 450.278  | 1347.80969 | 450.277161 | 3 | 14 | 17.8043 | 8.30  |
| 19 | 47.69 | 49.71 | 41.5 NUF2_FlexII  | 99.0 MQQLNAAHQEALMK                   | Label: 13C(6)15N(2)(K) @ 14                                                                                                            |                                 | 0.00293223  | 1619.80335 | 540.9417 | 1619.80029 | 540.940735 | 3 | 13 | 15.5641 | 8.30  |
| 19 | 47.69 | 49.71 | 41.5 NUF2_FlexII  | 99.0 MQQLNAAHQEALMK                   | Label: 13C(6)15N(2)(K) @ 14                                                                                                            |                                 | 0.00146739  | 1619.80188 | 540.9412 | 1619.80029 | 540.940735 | 3 | 13 | 15.8263 | 8.30  |
| 19 | 47.69 | 49.71 | 41.5 NUF2_FlexII  | 99.0 QLSDGIQELQQSLNQDFHOK             | Deamidated(Q) @ 7; Label: 13C(6)15N(2)(K) @ 20                                                                                         |                                 | 0.0158079   | 2364.15942 | 789.0604 | 2364.14348 | 789.055176 | 3 | 13 | 19.056  | 8.30  |
| 19 | 47.69 | 49.71 | 41.5 NUF2_FlexII  | 99.0 SSADKMQQLNAAHQEALMK              | Label: 13C(6)15N(2)(K) @ 5; Deamidated(Q) @ 8; Label: 13C(6)15N(2)(K) @ 19                                                             | missed K-M @ 5                  | 0.0343066   | 2117.05566 | 530.2712 | 2117.02173 | 530.262695 | 4 | 11 | 15.5388 | 8.30  |
| 19 | 47.69 | 49.71 | 41.5 NUF2_FlexII  | 99.0 TIVLOEGNSQKK                     | Label: 13C(6)15N(2)(K) @ 11; Label: 13C(6)15N(2)(K) @ 12                                                                               | missed K-K @ 11                 | 0.00166322  | 1359.77112 | 454.2643 | 1359.76929 | 454.263702 | 3 | 11 | 14.298  | 8.30  |
| 19 | 47.69 | 49.71 | 41.5 NUF2_FlexII  | 99.0 TIVLOEGNSQKK                     | Label: 13C(6)15N(2)(K) @ 11; Label: 13C(6)15N(2)(K) @ 12                                                                               | missed K-K @ 11                 | -0.00223661 | 1359.76709 | 680.8908 | 1359.76929 | 680.891907 | 2 | 11 | 14.2955 | 8.30  |
| 19 | 47.69 | 49.71 | 41.5 NUF2_FlexII  | 99.0 TVIEDCNKQVEK                     | Propionamide(C) @ 6; Label: 13C(6)15N(2)(K) @ 8; Label: 13C(6)15N(2)(K) @ 12                                                           | missed K-V @ 8                  | 0.00924814  | 1491.76672 | 746.8906 | 1491.75745 | 746.885986 | 2 | 18 | 13.8238 | 8.30  |
| 19 | 47.69 | 49.71 | 41.5 NUF2_FlexII  | 99.0 TVIEDCNKQVEK                     | Propionamide(C) @ 6; Label: 13C(6)15N(2)(K) @ 8; Label: 13C(6)15N(2)(K) @ 12                                                           | missed K-V @ 8                  | 0.00628154  | 1491.76355 | 498.2618 | 1491.75745 | 498.259735 | 3 | 11 | 13.8106 | 8.30  |
| 19 | 47.69 | 49.71 | 41.5 NUF2_FlexII  | 99.0 TVIEDCNKQVEK                     | Propionamide(C) @ 6; Label: 13C(6)15N(2)(K) @ 8; Label: 13C(6)15N(2)(K) @ 12                                                           | missed K-V @ 8                  | 0.0048167   | 1491.76245 | 498.2614 | 1491.75745 | 498.259735 | 3 | 10 | 14.0763 | 8.30  |
| 19 | 47.69 | 49.71 | 41.5 NUF2_FlexII  | 99.0 TVIEDCNKQVEKR                    | Propionamide(C) @ 6; Label: 13C(6)15N(2)(K) @ 8; Label: 13C(6)15N(2)(K) @ 12; Label: 13C(6)15N(4)(R) @ 13                              | missed K-V @ 8; missed K-R @ 12 | -0.00952311 | 1657.8573  | 415.4716 | 1657.86682 | 415.473969 | 4 | 10 | 13.6368 | 8.30  |
| 19 | 47.69 | 49.71 | 41.5 NUF2_FlexII  | 99.0 VDNFETADILCPK                    | Propionamide(C) @ 11; Label: 13C(6)15N(2)(K) @ 13                                                                                      |                                 | -0.00147815 | 1542.74646 | 772.3805 | 1542.74793 | 772.381226 | 2 | 9  | 21.6942 | 8.30  |
| 19 | 47.69 | 49.71 | 41.5 NUF2_FlexII  | 99.0 YPTFLYK                          | Label: 13C(6)15N(2)(K) @ 7                                                                                                             | cleaved T-Y @ N-term            | -0.00165037 | 938.497681 | 470.2561 | 938.499329 | 470.256928 | 2 | 9  | 18.0092 | 8.30  |
| 19 | 47.69 | 49.71 | 41.5 NUF2_FlexII  | 99.0 YPTFLYK                          | Label: 13C(6)15N(2)(K) @ 7                                                                                                             | cleaved T-Y @ N-term            | 0.00020099  | 938.499451 | 470.257  | 938.499329 | 470.256928 | 2 | 9  | 17.9008 | 8.30  |
| 19 | 47.69 | 49.71 | 41.5 NUF2_FlexII  | 99.0 YPTFLYK                          | Label: 13C(6)15N(2)(K) @ 7                                                                                                             | cleaved T-Y @ N-term            | -0.0091407  | 938.498474 | 470.2565 | 938.499329 | 470.256928 | 2 | 9  | 17.7612 | 8.30  |
| 20 | 46.06 | 48.06 | 47.7 STK24_FlexII | 99.0 AANVLSEHGEVK                     |                                                                                                                                        |                                 | 0.00287207  | 1365.72815 | 456.25   | 1365.72522 | 456.249023 | 3 | 10 | 15.7363 | 27.14 |
| 20 | 46.06 | 48.06 | 47.7 STK24_FlexII | 99.0 ADIWLSGITAEIAR                   |                                                                                                                                        |                                 | 0.00258938  | 1627.89612 | 814.9553 | 1627.89331 | 814.95398  | 2 | 18 | 20.5863 | 27.14 |
| 20 | 46.06 | 48.06 | 47.7 STK24_FlexII | 99.0 ADPEELFTK                        |                                                                                                                                        |                                 | 0.00330509  | 1056.52527 | 529.2699 | 1056.52185 | 529.26825  | 2 | 9  | 17.3026 | 27.14 |
| 20 | 46.06 | 48.06 | 47.7 STK24_FlexII | 99.0 ADPEELFTKLEK                     | Label: 13C(6)15N(2)(K) @ 9                                                                                                             |                                 | -6.03E-05   | 1434.75757 | 479.2598 | 1434.75769 | 479.259857 | 3 | 10 | 18.1603 | 27.14 |
| 20 | 46.06 | 48.06 | 47.7 STK24_FlexII | 99.0 DIPKRPFSSQCLSTIISPLFAELKEK       | Label: 13C(6)15N(2)(K) @ 4; Label: 13C(6)15N(4)(R) @ 5; Propionamide(C) @ 10; Label: 13C(6)15N(2)(K) @ 23; Label: 13C(6)15N(2)(K) @ 18 | missed K-R @ 4; missed K-E @ 23 | 0.00058917  | 2964.64526 | 742.1686 | 2964.64478 | 742.168457 | 4 | 16 | 20.0763 | 27.14 |
| 20 | 46.06 | 48.06 | 47.7 STK24_FlexII | 99.0 EFVEACLNKEPSFRPTAK               | Propionamide(C) @ 6; Label: 13C(6)15N(2)(K) @ 9; Label: 13C(6)15N(4)(R) @ 14; Label: 13C(6)15N(2)(K) @ 18                              | missed K-E @ 9                  | 0.00279578  | 2162.10669 | 721.7095 | 2162.104   | 721.708618 | 3 | 11 | 16.5417 | 27.14 |
| 20 | 46.06 | 48.06 | 47.7 STK24_FlexII | 99.0 GAIYLAEEACPGISDTMVAQLVQR         | Propionamide(C) @ 10; Label: 13C(6)15N(4)(R) @ 24                                                                                      |                                 | 0.00059622  | 2615.29688 | 872.7729 | 2615.29639 | 872.772705 | 3 | 24 | 20.0175 | 27.14 |
| 20 | 46.06 | 48.06 | 47.7 STK24_FlexII | 99.0 GEPFHSELHPMK                     | Label: 13C(6)15N(2)(K) @ 12                                                                                                            |                                 | 0.00159717  | 1365.66065 | 683.8376 | 1365.65906 | 683.836792 | 2 | 13 | 14.2124 | 27.14 |
| 20 | 46.06 | 48.06 | 47.7 STK24_FlexII | 99.0 GSFGEVFK                         | Label: 13C(6)15N(2)(K) @ 8                                                                                                             |                                 | 0.00015267  | 877.442688 | 439.7286 | 877.442505 | 439.728546 | 2 | 8  | 17.2071 | 27.14 |
| 20 | 46.06 | 48.06 | 47.7 STK24_FlexII | 99.0 GSFGEVFGIDNR                     | Label: 13C(6)15N(2)(K) @ 8; Label: 13C(6)15N(4)(R) @ 13                                                                                | missed K-G @ 8                  | 0.010717    | 1442.73816 | 481.92   | 1442.7273  | 481.916382 | 3 | 10 | 17.5768 | 27.14 |
| 20 | 46.06 | 48.06 | 47.7 STK24_FlexII | 99.0 IGKGSFGEVFGIDNR                  | Label: 13C(6)15N(2)(K) @ 3; Label: 13C(6)15N(2)(K) @ 11; Label: 13C(6)15N(4)(R) @ 16                                                   | missed K-G @ 3; missed K-G @ 11 | 0.00544659  | 1748.94727 | 583.9897 | 1748.94202 | 583.987915 | 3 | 16 | 17.2637 | 27.14 |
| 20 | 46.06 | 48.06 | 47.7 STK24_FlexII | 99.0 IIDLEEAEDIEIDQOETVLSQCDSPPYTK    | Deamidated(Q) @ 16; Propionamide(C) @ 24                                                                                               |                                 | 0.0415385   | 3636.75537 | 1213.259 | 3636.71289 | 1213.24487 | 3 | 18 | 20.6757 | 27.14 |
| 20 | 46.06 | 48.06 | 47.7 STK24_FlexII | 99.0 KTSYLTELDR                       | Label: 13C(6)15N(2)(K) @ 1; Label: 13C(6)15N(4)(R) @ 11                                                                                | missed K-T @ 1                  | -0.00152022 | 1355.74011 | 678.8773 | 1355.74158 | 678.878052 | 2 | 13 | 18.2297 | 27.14 |
| 20 | 46.06 | 48.06 | 47.7 STK24_FlexII | 99.0 NLENGALQPSDLDR                   |                                                                                                                                        |                                 | -0.00379086 | 1540.74451 | 771.3795 | 1540.74817 | 771.381348 | 2 | 13 | 16.902  | 27.14 |
| 20 | 46.06 | 48.06 | 47.7 STK24_FlexII | 99.0 NLENGALQPSDLDRNK                 | Label: 13C(6)15N(4)(R) @ 14; Label: 13C(6)15N(2)(K) @ 16                                                                               | missed R-N @ 14                 | -0.00894382 | 1800.89941 | 901.457  | 1800.90845 | 901.461548 | 2 | 17 | 16.1077 | 27.14 |
| 20 | 46.06 | 48.06 | 47.7 STK24_FlexII | 99.0 NNPTLEGNYSKPLK                   | Label: 13C(6)15N(2)(K) @ 12; Label: 13C(6)15N(2)(K) @ 15                                                                               |                                 | -0.0136547  |            |          |            |            |   |    |         |       |

|    |       |       |      |               |      |                                |                                                                                                                 |                |             |            |          |            |            |   |    |         |       |
|----|-------|-------|------|---------------|------|--------------------------------|-----------------------------------------------------------------------------------------------------------------|----------------|-------------|------------|----------|------------|------------|---|----|---------|-------|
| 20 | 46.06 | 48.06 | 47.7 | STK24_FlexIII | 99.0 | AANVLLSEHGEVK                  | Label:13C(6)15N(2)(K)@13                                                                                        |                | 0.0021575   | 1373.7417  | 687.8781 | 1373.73938 | 687.877014 | 2 | 16 | 16.266  | 27.14 |
| 20 | 46.06 | 48.06 | 47.7 | STK24_FlexIII | 99.0 | AANVLLSEHGEVK                  | Label:13C(6)15N(2)(K)@13                                                                                        |                | -0.00129998 | 1373.73816 | 458.92   | 1373.73938 | 458.92041  | 3 | 10 | 16.3166 | 27.14 |
| 20 | 46.06 | 48.06 | 47.7 | STK24_FlexIII | 99.0 | AANVLLSEHGEVK                  | Label:13C(6)15N(2)(K)@13                                                                                        |                | 0.0100525   | 1373.74951 | 458.9238 | 1373.73938 | 458.92041  | 3 | 10 | 26.5577 | 27.14 |
| 20 | 46.06 | 48.06 | 47.7 | STK24_FlexIII | 99.0 | AANVLLSEHGEVK                  | Label:13C(6)15N(2)(K)@13                                                                                        |                | -0.00129998 | 1373.73816 | 458.92   | 1373.73938 | 458.92041  | 3 | 7  | 28.1357 | 27.14 |
| 20 | 46.06 | 48.06 | 47.7 | STK24_FlexIII | 99.0 | ADIWSLGITAIELAR                | Label:13C(6)15N(4)(R)@15                                                                                        |                | -0.00044718 | 1637.90125 | 819.9579 | 1637.90161 | 819.958069 | 2 | 19 | 20.4708 | 27.14 |
| 20 | 46.06 | 48.06 | 47.7 | STK24_FlexIII | 99.0 | ADIWSLGITAIELAR                | Label:13C(6)15N(4)(R)@15                                                                                        |                | -0.014067   | 1637.88757 | 546.9698 | 1637.90161 | 546.974487 | 3 | 17 | 20.4795 | 27.14 |
| 20 | 46.06 | 48.06 | 47.7 | STK24_FlexIII | 99.0 | ADIWSLGITAIELAR                | Label:13C(6)15N(4)(R)@15                                                                                        |                | -0.00288858 | 1637.89893 | 819.9567 | 1637.90161 | 819.958069 | 2 | 18 | 20.7316 | 27.14 |
| 20 | 46.06 | 48.06 | 47.7 | STK24_FlexIII | 99.0 | ADIWSLGITAIELAR                | Label:13C(6)15N(4)(R)@15                                                                                        |                | 0.00419148  | 1637.90588 | 819.9602 | 1637.90161 | 819.958069 | 2 | 17 | 20.9903 | 27.14 |
| 20 | 46.06 | 48.06 | 47.7 | STK24_FlexIII | 99.0 | ADIWSLGITAIELAR                | Label:13C(6)15N(4)(R)@15                                                                                        |                | 0.00260457  | 1637.9043  | 819.9594 | 1637.90161 | 819.958069 | 2 | 16 | 21.2566 | 27.14 |
| 20 | 46.06 | 48.06 | 47.7 | STK24_FlexIII | 99.0 | ADIWSLGITAIELAR                | Label:13C(6)15N(4)(R)@15                                                                                        |                | 0.00260457  | 1637.9043  | 819.9594 | 1637.90161 | 819.958069 | 2 | 16 | 21.5105 | 27.14 |
| 20 | 46.06 | 48.06 | 47.7 | STK24_FlexIII | 99.0 | ADIWSLGITAIELAR                | Label:13C(6)15N(4)(R)@15                                                                                        |                | 0.00260457  | 1637.9043  | 819.9594 | 1637.90161 | 819.958069 | 2 | 18 | 21.761  | 27.14 |
| 20 | 46.06 | 48.06 | 47.7 | STK24_FlexIII | 99.0 | ADIWSLGITAIELAR                | Label:13C(6)15N(4)(R)@15                                                                                        |                | -0.003621   | 1637.89807 | 819.9563 | 1637.90161 | 819.958069 | 2 | 17 | 26.4561 | 27.14 |
| 20 | 46.06 | 48.06 | 47.7 | STK24_FlexIII | 99.0 | ADIWSLGITAIELAR                | Label:13C(6)15N(4)(R)@15                                                                                        |                | -0.0142577  | 1637.88745 | 819.951  | 1637.90161 | 819.958069 | 2 | 17 | 20.5495 | 27.14 |
| 20 | 46.06 | 48.06 | 47.7 | STK24_FlexIII | 99.0 | ADIWSLGITAIELAR                | Label:13C(6)15N(4)(R)@15                                                                                        |                | -0.0132684  | 1637.88806 | 546.97   | 1637.90161 | 546.974487 | 3 | 16 | 20.6152 | 27.14 |
| 20 | 46.06 | 48.06 | 47.7 | STK24_FlexIII | 99.0 | ADPEELFTKLEK                   | Label:13C(6)15N(2)(K)@9; Label:13C(6)15N(2)(K)@12                                                               | missed K-L @9  | 0.00025387  | 1434.75794 | 718.3862 | 1434.75769 | 718.386108 | 2 | 16 | 18.1617 | 27.14 |
| 20 | 46.06 | 48.06 | 47.7 | STK24_FlexIII | 99.0 | ADPEELFTKLEK                   | Label:13C(6)15N(2)(K)@9; Label:13C(6)15N(2)(K)@12                                                               | missed K-L @9  | 0.00684565  | 1434.76453 | 718.3895 | 1434.75769 | 718.386108 | 2 | 13 | 18.4428 | 27.14 |
| 20 | 46.06 | 48.06 | 47.7 | STK24_FlexIII | 99.0 | GAIYLAEEACPGISDTMVAQLVQR       | Propionamide(C)@10; Deamidated(Q)@20; Label:13C(6)15N(4)(R)@24                                                  |                | 0.0256762   | 2616.30615 | 873.1093 | 2616.28027 | 873.100708 | 3 | 13 | 19.7386 | 27.14 |
| 20 | 46.06 | 48.06 | 47.7 | STK24_FlexIII | 99.0 | GAIYLAEEACPGISDTMVAQLVQR       | Propionamide(C)@10; Deamidated(Q)@20; Label:13C(6)15N(4)(R)@24                                                  |                | 0.0223283   | 2616.30347 | 1309.159 | 2616.28027 | 1309.14746 | 2 | 14 | 19.7734 | 27.14 |
| 20 | 46.06 | 48.06 | 47.7 | STK24_FlexIII | 99.0 | GAIYLAEEACPGISDTMVAQLVQR       | Propionamide(C)@10; Deamidated(Q)@20; Label:13C(6)15N(4)(R)@24                                                  |                | 0.0301895   | 2616.30933 | 1309.162 | 2616.28027 | 1309.14746 | 2 | 15 | 19.9481 | 27.14 |
| 20 | 46.06 | 48.06 | 47.7 | STK24_FlexIII | 99.0 | GAIYLAEEACPGISDTMVAQLVQR       | Propionamide(C)@10; Deamidated(Q)@20; Label:13C(6)15N(4)(R)@24                                                  |                | 0.0311788   | 2616.31152 | 873.1111 | 2616.28027 | 873.100708 | 3 | 14 | 19.8519 | 27.14 |
| 20 | 46.06 | 48.06 | 47.7 | STK24_FlexIII | 99.0 | IIDLEEADEIEDIOQEITVLSQCDSPPYTK | Deamidated(Q)@15; Propionamide(C)@24; Label:13C(6)15N(2)(K)@31                                                  |                | 0.0007669   | 3644.72778 | 912.1892 | 3644.72705 | 912.189026 | 4 | 25 | 20.576  | 27.14 |
| 20 | 46.06 | 48.06 | 47.7 | STK24_FlexIII | 99.0 | IIDLEEADEIEDIOQEITVLSQCDSPPYTK | Deamidated(Q)@16; Propionamide(C)@24; Label:13C(6)15N(2)(K)@31                                                  |                | 0.0007669   | 3644.72778 | 912.1892 | 3644.72705 | 912.189026 | 4 | 21 | 20.8319 | 27.14 |
| 20 | 46.06 | 48.06 | 47.7 | STK24_FlexIII | 99.0 | IIDLEEADEIEDIOQEITVLSQCDSPPYTK | Propionamide(C)@24; Label:13C(6)15N(2)(K)@31                                                                    |                | 0.00121158  | 3643.74512 | 1215.589 | 3643.74292 | 1215.58826 | 3 | 25 | 20.8481 | 27.14 |
| 20 | 46.06 | 48.06 | 47.7 | STK24_FlexIII | 99.0 | IIDLEEADEIEDIOQEITVLSQCDSPPYTK | Propionamide(C)@24; Label:13C(6)15N(2)(K)@31                                                                    |                | 0.00121158  | 3643.74512 | 1215.589 | 3643.74292 | 1215.58826 | 3 | 16 | 21.1814 | 27.14 |
| 20 | 46.06 | 48.06 | 47.7 | STK24_FlexIII | 99.0 | IIDLEEADEIEDIOQEITVLSQCDSPPYTK | Deamidated(Q)@16; Propionamide(C)@24; Label:13C(6)15N(2)(K)@31                                                  |                | 0.00742873  | 3644.73511 | 1215.919 | 3644.72705 | 1215.91626 | 3 | 12 | 21.6884 | 27.14 |
| 20 | 46.06 | 48.06 | 47.7 | STK24_FlexIII | 99.0 | IIDLEEADEIEDIOQEITVLSQCDSPPYTK | Deamidated(Q)@16; Propionamide(C)@24; Label:13C(6)15N(2)(K)@31                                                  |                | 0.0408059   | 3644.76782 | 912.1992 | 3644.72705 | 912.189026 | 4 | 8  | 21.7897 | 27.14 |
| 20 | 46.06 | 48.06 | 47.7 | STK24_FlexIII | 99.0 | IIDLEEADEIEDIOQEITVLSQCDSPPYTK | Deamidated(Q)@16; Propionamide(C)@24; Label:13C(6)15N(2)(K)@31                                                  |                | 0.00885522  | 3644.73584 | 912.1912 | 3644.72705 | 912.189026 | 4 | 22 | 20.6426 | 27.14 |
| 20 | 46.06 | 48.06 | 47.7 | STK24_FlexIII | 99.0 | KTSVLTLEIDR                    | Label:13C(6)15N(2)(K)@1; Label:13C(6)15N(4)(R)@11                                                               | missed K-T @1  | -0.00090987 | 1355.74072 | 678.8776 | 1355.74158 | 678.878052 | 2 | 17 | 17.9481 | 27.14 |
| 20 | 46.06 | 48.06 | 47.7 | STK24_FlexIII | 99.0 | KTSVLTLEIDR                    | Label:13C(6)15N(2)(K)@1; Label:13C(6)15N(4)(R)@11                                                               | missed K-T @1  | 0.00045441  | 1355.74207 | 452.9213 | 1355.74158 | 452.921112 | 3 | 12 | 17.9658 | 27.14 |
| 20 | 46.06 | 48.06 | 47.7 | STK24_FlexIII | 99.0 | NLENGALQPSDLDR                 | Deamidated(N)@4; Label:13C(6)15N(4)(R)@14                                                                       |                | 0.00390632  | 1551.74451 | 776.8795 | 1551.74048 | 776.877502 | 2 | 18 | 16.6127 | 27.14 |
| 20 | 46.06 | 48.06 | 47.7 | STK24_FlexIII | 99.0 | NLENGALQPSDLDR                 | Deamidated(N)@4                                                                                                 |                | -0.00782761 | 1541.72424 | 771.8694 | 1541.73218 | 771.873352 | 2 | 13 | 16.7173 | 27.14 |
| 20 | 46.06 | 48.06 | 47.7 | STK24_FlexIII | 99.0 | NLENGALQPSDLDR                 | Label:13C(6)15N(4)(R)@14                                                                                        |                | -0.0109012  | 1550.75525 | 776.3849 | 1550.75647 | 776.385498 | 2 | 15 | 16.8311 | 27.14 |
| 20 | 46.06 | 48.06 | 47.7 | STK24_FlexIII | 99.0 | NLENGALQPSDLDR                 | Deamidated(N)@4; Label:13C(6)15N(4)(R)@14                                                                       |                | -0.00048821 | 1551.74011 | 776.8773 | 1551.74048 | 776.877502 | 2 | 18 | 17.1122 | 27.14 |
| 20 | 46.06 | 48.06 | 47.7 | STK24_FlexIII | 99.0 | NLENGALQPSDLDRNK               | Deamidated(N)@4; Label:13C(6)15N(4)(R)@14; Label:13C(6)15N(2)(K)@16                                             | missed R-N @14 | -0.00586604 | 1801.88391 | 901.9492 | 1801.89258 | 901.935552 | 2 | 15 | 15.9498 | 27.14 |
| 20 | 46.06 | 48.06 | 47.7 | STK24_FlexIII | 99.0 | NLENGALQPSDLDRNK               | Deamidated(N)@4; Label:13C(6)15N(4)(R)@14; Label:13C(6)15N(2)(K)@16                                             | missed R-N @14 | 0.0048937   | 1801.89746 | 601.6398 | 1801.89258 | 601.638123 | 3 | 15 | 15.9679 | 27.14 |
| 20 | 46.06 | 48.06 | 47.7 | STK24_FlexIII | 99.0 | NLENGALQPSDLDRNK               | Deamidated(Q)@8; Label:13C(6)15N(4)(R)@14; Label:13C(6)15N(2)(K)@16                                             | missed R-N @14 | 0.0048937   | 1801.89746 | 601.6398 | 1801.89258 | 601.638123 | 3 | 11 | 16.2445 | 27.14 |
| 20 | 46.06 | 48.06 | 47.7 | STK24_FlexIII | 99.0 | NNPPTLEGNYSKPLK                | Label:13C(6)15N(2)(K)@12; Label:13C(6)15N(2)(K)@15                                                              | missed R-N @14 | 0.0129656   | 1686.904   | 844.4594 | 1686.89124 | 844.452881 | 2 | 13 | 15.6129 | 27.14 |
| 20 | 46.06 | 48.06 | 47.7 | STK24_FlexIII | 99.0 | NTFVGTFPFWMAPEVIK              | Label:13C(6)15N(2)(K)@16                                                                                        |                | -0.00386455 | 1843.93835 | 615.6534 | 1843.94226 | 615.654663 | 3 | 12 | 19.1599 | 27.14 |
| 20 | 46.06 | 48.06 | 47.7 | STK24_FlexIII | 99.0 | NTFVGTFPFWMAPEVIK              | Label:13C(6)15N(2)(K)@16                                                                                        |                | 0.00157657  | 1843.94385 | 922.9792 | 1843.94226 | 922.978394 | 2 | 11 | 19.1665 | 27.14 |
| 20 | 46.06 | 48.06 | 47.7 | STK24_FlexIII | 99.0 | NTFVGTFPFWMAPEVIK              | Oxidation(M)@10; Label:13C(6)15N(2)(K)@16                                                                       |                | -0.00227588 | 1859.93481 | 930.9747 | 1859.93713 | 930.97583  | 2 | 14 | 19.6421 | 27.14 |
| 20 | 46.06 | 48.06 | 47.7 | STK24_FlexIII | 99.0 | NTFVGTFPFWMAPEVIK              | Oxidation(M)@10; Label:13C(6)15N(2)(K)@16                                                                       |                | -0.00093311 | 1859.93628 | 930.9754 | 1859.93713 | 930.97583  | 2 | 16 | 20.1987 | 27.14 |
| 20 | 46.06 | 48.06 | 47.7 | STK24_FlexIII | 99.0 | NTFVGTFPFWMAPEVIK              | Label:13C(6)15N(2)(K)@16                                                                                        |                | 0.00157657  | 1843.94385 | 922.9792 | 1843.94226 | 922.978394 | 2 | 17 | 20.2045 | 27.14 |
| 20 | 46.06 | 48.06 | 47.7 | STK24_FlexIII | 99.0 | NTFVGTFPFWMAPEVIK              | Label:13C(6)15N(2)(K)@16                                                                                        |                | 0.00089618  | 1843.94324 | 615.655  | 1843.94226 | 615.654663 | 3 | 17 | 20.2565 | 27.14 |
| 20 | 46.06 | 48.06 | 47.7 | STK24_FlexIII | 99.0 | NTFVGTFPFWMAPEVIK              | Label:13C(6)15N(2)(K)@16                                                                                        |                | -0.00037655 | 1843.9419  | 922.9782 | 1843.94226 | 922.978394 | 2 | 16 | 20.4672 | 27.14 |
| 20 | 46.06 | 48.06 | 47.7 | STK24_FlexIII | 99.0 | NTFVGTFPFWMAPEVIK              | Label:13C(6)15N(2)(K)@16                                                                                        |                | 0.00157657  | 1843.94385 | 922.9792 | 1843.94226 | 922.978394 | 2 | 15 | 20.7852 | 27.14 |
| 20 | 46.06 | 48.06 | 47.7 | STK24_FlexIII | 99.0 | NTFVGTFPFWMAPEVIK              | Deamidated(N)@1; Label:13C(6)15N(2)(K)@16                                                                       |                | 0.0175593   | 1844.94385 | 923.4792 | 1844.92627 | 923.470398 | 2 | 10 | 21.3088 | 27.14 |
| 20 | 46.06 | 48.06 | 47.7 | STK24_FlexIII | 99.0 | NTFVGTFPFWMAPEVIK              | Label:13C(6)15N(2)(K)@16                                                                                        |                | 0.00157657  | 1843.94385 | 922.9792 | 1843.94226 | 922.978394 | 2 | 14 | 21.5667 | 27.14 |
| 20 | 46.06 | 48.06 | 47.7 | STK24_FlexIII | 99.0 | NTFVGTFPFWMAPEVIK              | Label:13C(6)15N(2)(K)@16                                                                                        |                | 0.00157657  | 1843.94385 | 922.9792 | 1843.94226 | 922.978394 | 2 | 15 | 21.8275 | 27.14 |
| 20 | 46.06 | 48.06 | 47.7 | STK24_FlexIII | 99.0 | NTFVGTFPFWMAPEVIK              | Label:13C(6)15N(2)(K)@16                                                                                        |                | 0.00157657  | 1843.94385 | 922.9792 | 1843.94226 | 922.978394 | 2 | 8  | 24.6523 | 27.14 |
| 20 | 46.06 | 48.06 | 47.7 | STK24_FlexIII | 99.0 | NTFVGTFPFWMAPEVIK              | Label:13C(6)15N(2)(K)@16                                                                                        |                | 0.00157657  | 1843.94385 | 922.9792 | 1843.94226 | 922.978394 | 2 | 15 | 26.4517 | 27.14 |
| 20 | 46.06 | 48.06 | 47.7 | STK24_FlexIII | 99.0 | QSAYDSKADIVSLGITAIELAR         | Deamidated(Q)@1; Label:13C(6)15N(2)(K)@7; Label:13C(6)15N(4)(R)@22                                              | missed K-A @7  | 0.0115369   | 2426.25635 | 809.7594 | 2426.24487 | 809.755554 | 3 | 14 | 20.3351 | 27.14 |
| 20 | 46.06 | 48.06 | 47.7 | STK24_FlexIII | 99.0 | QSAYDSKADIVSLGITAIELAR         | Label:13C(6)15N(2)(K)@7; Label:13C(6)15N(4)(R)@22                                                               | missed K-A @7  | -0.0179256  | 2425.24341 | 1213.629 | 2425.26074 | 1213.6377  | 2 | 21 | 20.4148 | 27.14 |
| 20 | 46.06 | 48.06 | 47.7 | STK24_FlexIII | 99.0 | RPFSQLSLTIISPLFAELKEK          | Label:13C(6)15N(4)(R)@1; Deamidated(Q)@5; Propionamide(C)@6; Label:13C(6)15N(2)(K)@19; Label:13C(6)15N(2)(K)@21 | missed K-E @19 | 0.0136635   | 2504.36963 | 627.0997 | 2504.35596 | 627.096252 | 4 | 16 | 20.0822 | 27.14 |
| 20 | 46.06 | 48.06 | 47.7 | STK24_FlexIII | 99.0 | SQACGNGLGSIEELR                | Propionamide(C)@4; Label:13C(6)15N(4)(R)@15                                                                     |                | -0.00643198 | 1613.76428 | 807.8894 | 1613.77063 | 807.892639 | 2 | 19 | 17.1818 | 27.14 |
| 20 | 46.06 | 48.06 | 47.7 | STK24_FlexIII | 99.0 | SQACGNGLGSIEELR                | Propionamide(C)@4; Label:13C(6)15N(4)(R)@15                                                                     |                | -0.014271   | 1613.76929 | 807.8919 | 1613.77063 | 807.892639 | 2 | 16 | 17.4457 | 27.14 |
| 20 | 46.06 | 48.06 | 47.7 | STK24_FlexIII | 99.0 | VLFLLPK                        | Label:13C(6)15N(2)(K)@7                                                                                         |                | 0.00403072  | 836.565491 | 419.29   | 836.561523 | 419.288025 | 2 | 8  | 18.9521 | 27.14 |
|    |       |       |      |               |      |                                |                                                                                                                 |                |             |            |          |            |            |   |    |         |       |

|    |       |       |                     |                                     |                                                                                                        |                               |             |            |          |            |            |   |    |         |      |
|----|-------|-------|---------------------|-------------------------------------|--------------------------------------------------------------------------------------------------------|-------------------------------|-------------|------------|----------|------------|------------|---|----|---------|------|
| 21 | 45.74 | 47.74 | 45.3 BAIAP2_Flexiil | 99.0 LPLWQQACADPSKIPER              | Propionamide(C) @8; Label: 13C(6) 15N(2)(K) @13; Label: 13C(6) 15N(4)(R) @17                           | missed K-I @13                | 0.0142761   | 2040.07227 | 681.0314 | 2040.05811 | 681.026672 | 3 | 17 | 17.6401 | 1.93 |
| 21 | 45.74 | 47.74 | 45.3 BAIAP2_Flexiil | 99.0 LSDSYSNTLPIVR                  | Label: 13C(6) 15N(4)(R) @12                                                                            |                               | 0.0019653   | 1360.68823 | 681.3514 | 1360.68616 | 681.350403 | 2 | 13 | 16.4257 | 1.93 |
| 21 | 45.74 | 47.74 | 45.3 BAIAP2_Flexiil | 99.0 LSDSYSNTLPIVRK                 | Label: 13C(6) 15N(4)(R) @12; Label: 13C(6) 15N(2)(K) @13                                               |                               | -0.00651436 | 1496.78882 | 749.4017 | 1496.79541 | 749.404968 | 2 | 14 | 15.4581 | 1.93 |
| 21 | 45.74 | 47.74 | 45.3 BAIAP2_Flexiil | 99.0 MRGWFFPFSYTR                   | Label: 13C(6) 15N(4)(R) @2; Label: 13C(6) 15N(4)(R) @11                                                | missed R-K @12                | 0.00446383  | 1466.70764 | 734.3611 | 1466.70325 | 734.358887 | 2 | 14 | 16.9982 | 1.93 |
| 21 | 45.74 | 47.74 | 45.3 BAIAP2_Flexiil | 99.0 NFIAMGK                        | Label: 13C(6) 15N(2)(K) @7                                                                             | missed R-G @2                 | -0.00100047 | 787.413269 | 394.7139 | 787.414185 | 394.714386 | 2 | 9  | 16.4512 | 1.93 |
| 21 | 45.74 | 47.74 | 45.3 BAIAP2_Flexiil | 99.0 QGELENYVSDGYK                  | Label: 13C(6) 15N(2)(K) @13                                                                            |                               | -0.00144516 | 1508.68604 | 755.3503 | 1508.6875  | 755.351013 | 2 | 13 | 16.7625 | 1.93 |
| 21 | 45.74 | 47.74 | 45.3 BAIAP2_Flexiil | 99.0 QIQNQLEEMLK                    | Label: 13C(6) 15N(2)(K) @11                                                                            |                               | -0.00796552 | 1380.70825 | 691.3614 | 1380.71631 | 691.365418 | 2 | 12 | 18.6304 | 1.93 |
| 21 | 45.74 | 47.74 | 45.3 BAIAP2_Flexiil | 99.0 QRPYSVAVPAFSGQLDDYGAR          | Label: 13C(6) 15N(4)(R) @2; Label: 13C(6) 15N(4)(R) @21                                                |                               | -0.00669582 | 2316.13355 | 773.0518 | 2316.14014 | 773.054016 | 3 | 21 | 18.062  | 1.93 |
| 21 | 45.74 | 47.74 | 45.3 BAIAP2_Flexiil | 99.0 SSSMAAGLER                     | Label: 13C(6) 15N(4)(R) @10                                                                            |                               | 0.00789001  | 1017.48669 | 509.7506 | 1017.47888 | 509.746704 | 2 | 11 | 15.1495 | 1.93 |
| 21 | 45.74 | 47.74 | 45.3 BAIAP2_Flexiil | 99.0 SSSGTNLLDKDDLAIPPPDYGAASR      | Label: 13C(6) 15N(2)(K) @10; Label: 13C(6) 15N(4)(R) @25                                               | missed K-D @10                | 0.0082221   | 2577.27564 | 860.0992 | 2577.26782 | 860.096497 | 3 | 15 | 17.7192 | 1.93 |
| 21 | 45.74 | 47.74 | 45.3 BAIAP2_Flexiil | 99.0 TIMEQFNPSLR                    | Label: 13C(6) 15N(4)(R) @11                                                                            |                               | -0.00813545 | 1344.66553 | 673.34   | 1344.67358 | 673.344055 | 2 | 12 | 17.8627 | 1.93 |
| 21 | 45.74 | 47.74 | 45.3 BAIAP2_Flexiil | 99.0 YLSAALK                        | Label: 13C(6) 15N(2)(K) @7                                                                             |                               | -0.00134098 | 772.456055 | 387.2353 | 772.457459 | 387.235992 | 2 | 7  | 15.7017 | 1.93 |
| 21 | 45.74 | 47.74 | 45.3 BAIAP2_Flexiil | 99.0 YLSAALKK                       | Label: 13C(6) 15N(2)(K) @7; Label: 13C(6) 15N(2)(K) @8                                                 | missed K-K @7                 | -0.00011601 | 908.566467 | 455.2905 | 908.566589 | 455.290588 | 2 | 10 | 14.4989 | 1.93 |
| 21 | 45.74 | 47.74 | 45.3 BAIAP2_Flexiil | 99.0 YSDKELQYDAISNK                 | Label: 13C(6) 15N(2)(K) @4; Label: 13C(6) 15N(2)(K) @15                                                | missed K-E @4                 | -0.00553494 | 1801.90149 | 601.6411 | 1801.90686 | 601.642883 | 3 | 16 | 17.4316 | 1.93 |
| 21 | 45.74 | 47.74 | 45.3 BAIAP2_Flexiil | 99.0 AIFSHAAGDNSTLLSFKEGDLITLLVPEAR | Deamidated(N) @10; Label: 13C(6) 15N(2)(K) @17; Label: 13C(6) 15N(4)(R) @30                            | missed K-E @17                | 0.0151851   | 3203.69849 | 801.9319 | 3203.68335 | 801.928101 | 4 | 10 | 20.2725 | 1.93 |
| 21 | 45.74 | 47.74 | 45.3 BAIAP2_Flexiil | 99.0 AIFSHAAGDNSTLLSPK              | Label: 13C(6) 15N(2)(K) @17                                                                            |                               | 0.00043581  | 1785.91443 | 596.3121 | 1785.91408 | 596.311951 | 3 | 18 | 18.0633 | 1.93 |
| 21 | 45.74 | 47.74 | 45.3 BAIAP2_Flexiil | 99.0 YPTFLYK                        | Label: 13C(6) 15N(2)(K) @7                                                                             | cleaved V-Y @N-term           | -0.00165037 | 938.497681 | 470.2561 | 938.499329 | 470.256928 | 2 | 9  | 18.0092 | 1.93 |
| 21 | 45.74 | 47.74 | 45.3 BAIAP2_Flexiil | 99.0 YPTFLYK                        | Label: 13C(6) 15N(2)(K) @7                                                                             | cleaved V-Y @N-term           | 0.00020099  | 938.499451 | 470.257  | 938.499329 | 470.256928 | 2 | 9  | 17.9008 | 1.93 |
| 21 | 45.74 | 47.74 | 45.3 BAIAP2_Flexiil | 99.0 YPTFLYK                        | Label: 13C(6) 15N(2)(K) @7                                                                             | cleaved V-Y @N-term           | -0.00091407 | 938.498474 | 470.2565 | 938.499329 | 470.256928 | 2 | 9  | 17.7612 | 1.93 |
| 21 | 45.74 | 47.74 | 45.3 BAIAP2_Flexiil | 99.0 YSDKELQYDAISNK                 | Label: 13C(6) 15N(2)(K) @4; Label: 13C(6) 15N(2)(K) @15                                                | missed K-E @4                 | -0.00221902 | 1801.90466 | 901.9596 | 1801.90686 | 901.960693 | 2 | 23 | 17.4416 | 1.93 |
| 22 | 45.72 | 47.76 | 72.9 BCKDK_Flexiil  | 99.0 ATMESHLDTPYNNVPDVIITANNNDVLIIR | Deamidated(N) @12; Label: 13C(6) 15N(4)(R) @30                                                         |                               | 0.0164179   | 3348.69531 | 1117.239 | 3348.67871 | 1117.23352 | 3 | 21 | 20.4529 | 2.26 |
| 22 | 45.72 | 47.76 | 72.9 BCKDK_Flexiil  | 99.0 AYAELYGGSLQLOSLQIGTDVYLR       | Label: 13C(6) 15N(4)(R) @25                                                                            |                               | -0.00325986 | 2724.39673 | 909.1395 | 2724.3999  | 909.140564 | 3 | 18 | 26.4498 | 2.26 |
| 22 | 45.72 | 47.76 | 72.9 BCKDK_Flexiil  | 99.0 CLPFIIGNPTILHVHLEYIR           | Propionamide(C) @1; Propionamide(C) @8; Deamidated(N) @9; Label: 13C(6) 15N(4)(R) @21                  |                               | 0.00592908  | 2603.3689  | 651.8495 | 2603.36328 | 651.848084 | 4 | 14 | 19.1531 | 2.26 |
| 22 | 45.72 | 47.76 | 72.9 BCKDK_Flexiil  | 99.0 FPFIPMLDYILPELLK               | Label: 13C(6) 15N(2)(K) @17                                                                            |                               | -0.00161112 | 2053.14331 | 1027.579 | 2053.14526 | 1027.57996 | 2 | 20 | 20.748  | 2.26 |
| 22 | 45.72 | 47.76 | 72.9 BCKDK_Flexiil  | 99.0 FPFIPMLDYILPELLKNAMR           | Oxidation(M) @6; Label: 13C(6) 15N(2)(K) @17; Label: 13C(6) 15N(4)(R) @21                              | missed K-N @17                | -0.0132066  | 2551.35693 | 851.4596 | 2551.37012 | 851.463989 | 3 | 13 | 20.6958 | 2.26 |
| 22 | 45.72 | 47.76 | 72.9 BCKDK_Flexiil  | 99.0 HDGREGESFR                     | Label: 13C(6) 15N(4)(R) @5; Label: 13C(6) 15N(4)(R) @10                                                | missed R-E @5                 | -0.00078773 | 1264.60571 | 633.3101 | 1264.60632 | 633.310425 | 2 | 13 | 13.5578 | 2.26 |
| 22 | 45.72 | 47.76 | 72.9 BCKDK_Flexiil  | 99.0 HIEDEKLVR                      | Label: 13C(6) 15N(2)(K) @6; Label: 13C(6) 15N(4)(R) @9                                                 | missed K-L @6                 | 0.00327239  | 1155.64002 | 386.2206 | 1155.63762 | 386.219513 | 3 | 12 | 13.9176 | 2.26 |
| 22 | 45.72 | 47.76 | 72.9 BCKDK_Flexiil  | 99.0 ISPLFGHLDMHSGAQSGPMHGFGLPTSR   | Deamidated(Q) @15; Label: 13C(6) 15N(4)(R) @30                                                         |                               | 0.0169448   | 3148.50537 | 1050.509 | 3148.48877 | 1050.50354 | 3 | 18 | 18.8026 | 2.26 |
| 22 | 45.72 | 47.76 | 72.9 BCKDK_Flexiil  | 99.0 KHIEDEKLVR                     | Label: 13C(6) 15N(2)(K) @1; Label: 13C(6) 15N(2)(K) @7; Label: 13C(6) 15N(4)(R) @10                    | missed K-H @1; missed K-L @7  | -0.00034861 | 1291.74548 | 646.88   | 1291.74585 | 646.880188 | 2 | 12 | 12.8194 | 2.26 |
| 22 | 45.72 | 47.76 | 72.9 BCKDK_Flexiil  | 99.0 LRHIDGREGESFR                  | Label: 13C(6) 15N(4)(R) @2; Label: 13C(6) 15N(4)(R) @7; Label: 13C(6) 15N(4)(R) @12                    | missed R-H @2; missed R-E @7  | 0.00510595  | 1543.80493 | 772.9097 | 1543.79981 | 772.907166 | 2 | 14 | 14.0714 | 2.26 |
| 22 | 45.72 | 47.76 | 72.9 BCKDK_Flexiil  | 99.0 LTFDPPIKQDAEAQYQQLVR           | Label: 13C(6) 15N(2)(K) @8; Propionamide(C) @17; Label: 13C(6) 15N(4)(R) @21                           | missed K-D @8                 | -0.00734135 | 2538.24707 | 847.0896 | 2538.2544  | 847.092041 | 3 | 24 | 18.2268 | 2.26 |
| 22 | 45.72 | 47.76 | 72.9 BCKDK_Flexiil  | 99.0 LTPTMMLYAGR                    | Label: 13C(6) 15N(4)(R) @11                                                                            |                               | -0.00128984 | 1262.63782 | 632.3262 | 1262.63904 | 632.326782 | 2 | 12 | 18.3185 | 2.26 |
| 22 | 45.72 | 47.76 | 72.9 BCKDK_Flexiil  | 99.0 MLATHHLALHEDKPDFVGIICTR        | Label: 13C(6) 15N(2)(K) @13; Propionamide(C) @21; Label: 13C(6) 15N(4)(R) @23                          |                               | -0.00528316 | 2705.38501 | 677.3535 | 2705.39014 | 677.354797 | 4 | 21 | 17.2123 | 2.26 |
| 22 | 45.72 | 47.76 | 72.9 BCKDK_Flexiil  | 99.0 QLDDHDKDVVTLAELGR              | Gln->pyro-Glu @N-term; Label: 13C(6) 15N(2)(K) @7; Label: 13C(6) 15N(4)(R) @18                         | missed K-D @7                 | -0.00301817 | 2035.10352 | 1018.559 | 2035.10693 | 1018.56073 | 2 | 23 | 20.1173 | 2.26 |
| 22 | 45.72 | 47.76 | 72.9 BCKDK_Flexiil  | 99.0 SGPGGGLPRLPLLKPALALR           | Label: 13C(6) 15N(4)(R) @10; Label: 13C(6) 15N(4)(R) @20                                               |                               | 0.00580319  | 1931.16431 | 966.5894 | 1931.15833 | 966.586426 | 2 | 11 | 19.6161 | 2.26 |
| 22 | 45.72 | 47.76 | 72.9 BCKDK_Flexiil  | 99.0 SKTVTSFYNQSAIDAAAEKPSVR        | Label: 13C(6) 15N(2)(K) @2; Label: 13C(6) 15N(2)(K) @19; Label: 13C(6) 15N(4)(R) @23                   | missed K-T @2                 | 0.00043923  | 2495.28735 | 832.7697 | 2495.28662 | 832.76947  | 3 | 24 | 16.5973 | 2.26 |
| 22 | 45.72 | 47.76 | 72.9 BCKDK_Flexiil  | 99.0 STSADTTHVHEMAR                 |                                                                                                        |                               | -0.0043589  | 1541.68481 | 771.8497 | 1541.68921 | 771.851929 | 2 | 14 | 12.6885 | 2.26 |
| 22 | 45.72 | 47.76 | 72.9 BCKDK_Flexiil  | 99.0 TVMTSYFNQSAIDAAAEKPSVR         | Deamidated(N) @7; Label: 13C(6) 15N(2)(K) @17; Label: 13C(6) 15N(4)(R) @21                             |                               | 0.00798267  | 2273.13745 | 758.7197 | 2273.1294  | 758.717102 | 3 | 15 | 16.9985 | 2.26 |
| 22 | 45.72 | 47.76 | 72.9 BCKDK_Flexiil  | 99.0 VMDYHFTTAEASTQDPR              | Label: 13C(6) 15N(4)(R) @17                                                                            |                               | 0.00176991  | 1977.87817 | 660.3    | 1977.87659 | 660.2995   | 3 | 20 | 16.2427 | 2.26 |
| 22 | 45.72 | 47.76 | 72.9 BCKDK_Flexiil  | 99.0 VRINGHVAAR                     | Label: 13C(6) 15N(4)(R) @2; Deamidated(N) @4; Label: 13C(6) 15N(4)(R) @10                              | missed R-I @2                 | -0.0116951  | 1112.62    | 371.8806 | 1112.63171 | 371.884522 | 3 | 11 | 13.6692 | 2.26 |
| 22 | 45.72 | 47.76 | 72.9 BCKDK_Flexiil  | 99.0 YLQGLPVR                       | Label: 13C(6) 15N(4)(R) @9                                                                             |                               | -0.00273367 | 1154.62964 | 578.3221 | 1154.63232 | 578.323425 | 2 | 12 | 16.6171 | 2.26 |
| 22 | 45.72 | 47.76 | 72.9 BCKDK_Flexiil  | 99.0 INGHVAARFPFIPMLDYILPELLKNAMR   | Deamidated(N) @2; Label: 13C(6) 15N(4)(R) @8; Label: 13C(6) 15N(2)(K) @25; Label: 13C(6) 15N(4)(R) @29 | missed R-F @8; missed K-N @25 | -0.00929576 | 3364.80933 | 842.2096 | 3364.81877 | 842.211914 | 4 | 13 | 20.5542 | 2.26 |
| 22 | 45.72 | 47.76 | 72.9 BCKDK_Flexiil  | 99.0 ATMESHLDTPYNNVPDVIITANNNDVLIIR | Deamidated(N) @12; Label: 13C(6) 15N(4)(R) @30                                                         |                               | 0.0164179   | 3348.69531 | 1117.239 | 3348.67871 | 1117.23352 | 3 | 20 | 20.7218 | 2.26 |
| 22 | 45.72 | 47.76 | 72.9 BCKDK_Flexiil  | 99.0 AYAELYGGSLQLOSLQIGTDVYLR       | Label: 13C(6) 15N(4)(R) @25                                                                            |                               | 0.00113466  | 2724.40088 | 909.1409 | 2724.3999  | 909.140564 | 3 | 21 | 19.9318 | 2.26 |
| 22 | 45.72 | 47.76 | 72.9 BCKDK_Flexiil  | 99.0 AYAELYGGSLQLOSLQIGTDVYLR       | Deamidated(Q) @13; Label: 13C(6) 15N(4)(R) @25                                                         |                               | 0.0184343   | 2725.40137 | 1363.708 | 2725.38379 | 1363.69922 | 2 | 25 | 19.9605 | 2.26 |
| 22 | 45.72 | 47.76 | 72.9 BCKDK_Flexiil  | 99.0 AYAELYGGSLQLOSLQIGTDVYLR       | Deamidated(Q) @13; Label: 13C(6) 15N(4)(R) @25                                                         |                               | 0.00259055  | 2725.38648 | 909.4694 | 2725.38379 | 909.468567 | 3 | 20 | 20.2442 | 2.26 |
| 22 | 45.72 | 47.76 | 72.9 BCKDK_Flexiil  | 99.0 AYAELYGGSLQLOSLQIGTDVYLR       | Deamidated(Q) @13; Label: 13C(6) 15N(4)(R) @25                                                         |                               | 0.0358412   | 2725.41968 | 909.4805 | 2725.38379 | 909.468567 | 3 | 18 | 20.0401 | 2.26 |
| 22 | 45.72 | 47.76 | 72.9 BCKDK_Flexiil  | 99.0 CLPFIIGNPTILHVHLEYIR           | Propionamide(C) @1; Propionamide(C) @8; Deamidated(N) @9; Label: 13C(6) 15N(4)(R) @21                  |                               | 0.0076698   | 2603.37085 | 651.85   | 2603.36328 | 651.848084 | 4 | 14 | 19.4412 | 2.26 |
| 22 | 45.72 | 47.76 | 72.9 BCKDK_Flexiil  | 99.0 CLPFIIGNPTILHVHLEYIR           | Propionamide(C) @1; Propionamide(C) @8; Label: 13C(6) 15N(4)(R) @21                                    |                               | -0.0223148  | 2602.35669 | 868.4595 | 2602.37915 | 868.46698  | 3 | 14 | 19.4604 | 2.26 |
| 22 | 45.72 | 47.76 | 72.9 BCKDK_Flexiil  | 99.0 FPFIPMLDYILPELLK               | Oxidation(M) @6; Label: 13C(6) 15N(2)(K) @17                                                           |                               | -0.0165804  | 2069.12329 | 1035.569 | 2069.14014 | 1035.57739 | 2 | 16 | 20.6865 | 2.26 |
| 22 | 45.72 | 47.76 | 72.9 BCKDK_Flexiil  | 99.0 INGHVAARFPFIPMLDYILPELLKNAMR   | Deamidated(N) @2; Label: 13C(6) 15N(4)(R) @8; Label: 13C(6) 15N(2)(K) @25; Label: 13C(6) 15N(4)(R) @29 | missed R-F @8; missed K-N @25 | -0.00536414 | 3364.81323 | 842.2096 | 3364.81877 | 842.211914 | 5 | 12 | 20.5627 | 2.26 |
| 22 | 45.72 | 47.76 | 72.9 BCKDK_Flexiil  | 99.0 ISPLFGHLDMHSGAQSGPMHGFGLPTSR   | Deamidated(Q) @15; Label: 13C(6) 15N(4)(R) @30                                                         |                               | 0.0169448   | 3148.50537 | 1050.509 | 3148.48877 | 1050.50354 | 3 | 15 | 19.061  | 2.26 |
| 22 | 45.72 | 47.76 | 72.9 BCKDK_Flexiil  | 99.0 ISPLFGHLDMHSGAQSGPMHGFGLPTSR   | Label: 13C(6) 15N(4)(R) @30                                                                            |                               | 0.00076922  | 3147.50562 | 630.5084 | 3147.50464 | 630.508179 | 5 | 13 | 18.7785 | 2.26 |
| 22 | 45.72 | 47.76 | 72.9 BCKDK_Flexiil  | 99.0 ISPLFGHLDMHSGAQSGPMHGFGLPTSR   | Deamidated(Q) @15; Label: 13C(6) 15N(4)(R) @30                                                         |                               | 0.0011011   | 3148.48975 | 788.1297 | 3148.48877 | 788.129456 | 4 | 12 | 18.753  | 2.26 |
| 22 | 45.72 | 47.76 | 72.9 BCKDK_Flexiil  | 99.0 KHIEDEKLVR                     | Label: 13C(6) 15N(2)(K) @1; Label: 13C(6) 15N(2)(K) @7; Label: 13C(6) 15N(4)(R) @10                    | missed K-H @1; missed K-L @7  | 0.00379663  | 1291.74976 | 431.5905 | 1291.74585 | 431.589233 | 3 | 12 | 12.754  | 2.26 |
| 22 | 45.72 | 47.76 | 72.9 BCKDK_Flexiil  | 99.0 KHIEDEKLVR                     | Label: 13C(6) 15N(2)(K) @1; Label: 13C(6) 15N(2)(K) @7; Label: 13C(6) 15N(4)(R) @10                    | missed K-H @1; missed K-L @7  | 0.0         |            |          |            |            |   |    |         |      |

|    |       |       |                   |                                                     |                                                                                                                                                   |                              |             |            |          |            |            |   |    |         |       |
|----|-------|-------|-------------------|-----------------------------------------------------|---------------------------------------------------------------------------------------------------------------------------------------------------|------------------------------|-------------|------------|----------|------------|------------|---|----|---------|-------|
| 22 | 45.72 | 47.76 | 72.9 BCKDK_FlexII | 99.0 SGPGGGLPLRLLGPALALR                            | Label: 13C(6)15N(4)(R)@10; Label: 13C(6)15N(4)(R)@20                                                                                              |                              | 0.00070163  | 1931.15894 | 644.7269 | 1931.15833 | 644.726746 | 3 | 11 | 19.8163 | 2.26  |
| 22 | 45.72 | 47.76 | 72.9 BCKDK_FlexII | 99.0 SKTVTSFYNQSAIDAAAEKPSVR                        | Label: 13C(6)15N(2)(K)@2; Label: 13C(6)15N(2)(K)@19; Label: 13C(6)15N(4)(R)@23                                                                    | missed K-T@2                 | 0.00461499  | 2495.29126 | 624.8301 | 2495.28662 | 624.828919 | 4 | 16 | 16.5541 | 2.26  |
| 22 | 45.72 | 47.76 | 72.9 BCKDK_FlexII | 99.0 STSATDTHHVMAR                                  | Label: 13C(6)15N(4)(R)@14                                                                                                                         |                              | 0.00736973  | 1551.70483 | 776.8597 | 1551.69751 | 776.856018 | 2 | 15 | 12.457  | 2.26  |
| 22 | 45.72 | 47.76 | 72.9 BCKDK_FlexII | 99.0 STSATDTHHVMAR                                  | Label: 13C(6)15N(4)(R)@14                                                                                                                         |                              | 0.0001676   | 1551.69763 | 776.8561 | 1551.69751 | 776.856018 | 2 | 23 | 12.7211 | 2.26  |
| 22 | 45.72 | 47.76 | 72.9 BCKDK_FlexII | 99.0 STSATDTHHVMAR                                  | Label: 13C(6)15N(4)(R)@14                                                                                                                         |                              | 0.00736973  | 1551.70483 | 776.8597 | 1551.69751 | 776.856018 | 2 | 18 | 13.0077 | 2.26  |
| 22 | 45.72 | 47.76 | 72.9 BCKDK_FlexII | 99.0 STSATDTHHVMAR                                  | Label: 13C(6)15N(4)(R)@14                                                                                                                         |                              | 0.00753843  | 1551.70508 | 776.8598 | 1551.69751 | 776.856018 | 2 | 10 | 12.5947 | 2.26  |
| 22 | 45.72 | 47.76 | 72.9 BCKDK_FlexII | 99.0 STSATDTHHVMAR                                  | Label: 13C(6)15N(4)(R)@14                                                                                                                         |                              | -0.00198493 | 1551.69544 | 518.2391 | 1551.69751 | 518.239807 | 3 | 12 | 12.7781 | 2.26  |
| 22 | 45.72 | 47.76 | 72.9 BCKDK_FlexII | 99.0 STSATDTHHVMAR                                  | Label: 13C(6)15N(4)(R)@14                                                                                                                         |                              | -0.00143561 | 1551.69617 | 518.2393 | 1551.69751 | 518.239807 | 3 | 10 | 12.5093 | 2.26  |
| 22 | 45.72 | 47.76 | 72.9 BCKDK_FlexII | 99.0 STSATDTHHVMAR                                  | Label: 13C(6)15N(4)(R)@14                                                                                                                         |                              | 0.00483164  | 1551.70239 | 518.2414 | 1551.69751 | 518.239807 | 3 | 11 | 12.6727 | 2.26  |
| 22 | 45.72 | 47.76 | 72.9 BCKDK_FlexII | 99.0 STSATDTHHVMAR                                  |                                                                                                                                                   |                              | 0.00604243  | 1541.69531 | 514.9057 | 1541.68921 | 514.903687 | 3 | 11 | 12.7353 | 2.26  |
| 22 | 45.72 | 47.76 | 72.9 BCKDK_FlexII | 99.0 STSATDTHHVMAR                                  | Label: 13C(6)15N(4)(R)@14                                                                                                                         |                              | 0.00245127  | 1551.69995 | 518.2406 | 1551.69751 | 518.239807 | 3 | 11 | 12.3923 | 2.26  |
| 22 | 45.72 | 47.76 | 72.9 BCKDK_FlexII | 99.0 STSATDTHHVMAR                                  | Label: 13C(6)15N(4)(R)@14                                                                                                                         |                              | 0.00098643  | 1551.69849 | 518.2401 | 1551.69751 | 518.239807 | 3 | 11 | 12.9423 | 2.26  |
| 22 | 45.72 | 47.76 | 72.9 BCKDK_FlexII | 99.0 STSATDTHHVMAR                                  | Label: 13C(6)15N(4)(R)@14                                                                                                                         |                              | 0.00153575  | 1551.6991  | 518.2403 | 1551.69751 | 518.239807 | 3 | 11 | 13.2036 | 2.26  |
| 22 | 45.72 | 47.76 | 72.9 BCKDK_FlexII | 99.0 STSATDTHHVMAR                                  | Label: 13C(6)15N(4)(R)@14                                                                                                                         |                              | -0.0044282  | 1551.69299 | 388.9305 | 1551.69751 | 388.931671 | 4 | 10 | 12.8377 | 2.26  |
| 22 | 45.72 | 47.76 | 72.9 BCKDK_FlexII | 99.0 TVTSFYNQSAIDAAAEKPSVR                          | Deamidated(N)@7; Label: 13C(6)15N(2)(K)@17; Label: 13C(6)15N(4)(R)@21                                                                             |                              | 0.0169567   | 2273.14526 | 1137.58  | 2273.1294  | 1137.57202 | 2 | 20 | 17.0454 | 2.26  |
| 22 | 45.72 | 47.76 | 72.9 BCKDK_FlexII | 99.0 TVTSFYNQSAIDAAAEKPSVR                          | Deamidated(N)@7; Label: 13C(6)15N(2)(K)@17; Label: 13C(6)15N(4)(R)@21                                                                             |                              | 0.0038092   | 2273.16333 | 1137.589 | 2273.1294  | 1137.57202 | 2 | 19 | 17.0004 | 2.26  |
| 22 | 45.72 | 47.76 | 72.9 BCKDK_FlexII | 99.0 TVTSFYNQSAIDAAAEKPSVR                          | Label: 13C(6)15N(2)(K)@17; Label: 13C(6)15N(4)(R)@21                                                                                              |                              | -0.00595126 | 2272.1394  | 758.3871 | 2272.14551 | 758.389099 | 3 | 16 | 17.2311 | 2.26  |
| 22 | 45.72 | 47.76 | 72.9 BCKDK_FlexII | 99.0 TVTSFYNQSAIDAAAEKPSVR                          | Deamidated(N)@7; Label: 13C(6)15N(2)(K)@17; Label: 13C(6)15N(4)(R)@21                                                                             |                              | -0.00622973 | 2273.12329 | 1137.569 | 2273.1294  | 1137.57202 | 2 | 19 | 17.2791 | 2.26  |
| 22 | 45.72 | 47.76 | 72.9 BCKDK_FlexII | 99.0 TVTSFYNQSAIDAAAEKPSVR                          | Deamidated(N)@7; Label: 13C(6)15N(2)(K)@17; Label: 13C(6)15N(4)(R)@21                                                                             |                              | 0.00795578  | 2273.13745 | 758.7197 | 2273.1294  | 758.717102 | 3 | 15 | 17.5739 | 2.26  |
| 22 | 45.72 | 47.76 | 72.9 BCKDK_FlexII | 99.0 TVTSFYNQSAIDAAAEKPSVR                          | Label: 13C(6)15N(2)(K)@17; Label: 13C(6)15N(4)(R)@21                                                                                              |                              | 0.00210537  | 2272.14746 | 758.3898 | 2272.14551 | 758.389099 | 3 | 14 | 16.9547 | 2.26  |
| 22 | 45.72 | 47.76 | 72.9 BCKDK_FlexII | 99.0 TVTSFYNQSAIDAAAEKPSVR                          | Deamidated(N)@7; Label: 13C(6)15N(2)(K)@17; Label: 13C(6)15N(4)(R)@21                                                                             |                              | 0.037985    | 2273.16724 | 758.7297 | 2273.1294  | 758.717102 | 3 | 12 | 26.5301 | 2.26  |
| 22 | 45.72 | 47.76 | 72.9 BCKDK_FlexII | 99.0 TVTSFYNQSAIDAAAEKPSVR                          | Label: 13C(6)15N(2)(K)@17; Label: 13C(6)15N(4)(R)@21                                                                                              |                              | -0.0279239  | 2272.11768 | 758.3798 | 2272.14551 | 758.389099 | 3 | 12 | 18.182  | 2.26  |
| 22 | 45.72 | 47.76 | 72.9 BCKDK_FlexII | 99.0 VMDYHFTTAEASTQDPR                              | Label: 13C(6)15N(4)(R)@17                                                                                                                         |                              | 0.00740027  | 1977.88403 | 989.9493 | 1977.87659 | 989.945557 | 2 | 22 | 16.2915 | 2.26  |
| 22 | 45.72 | 47.76 | 72.9 BCKDK_FlexII | 99.0 VMDYHFTTAEASTQDPR                              | Label: 13C(6)15N(4)(R)@17                                                                                                                         |                              | -0.0038048  | 1977.8728  | 660.2982 | 1977.87659 | 660.2995   | 3 | 19 | 16.5449 | 2.26  |
| 22 | 45.72 | 47.76 | 72.9 BCKDK_FlexII | 99.0 VRINGHVAAR                                     | Label: 13C(6)15N(4)(R)@2; Deamidated(N)@4; Label: 13C(6)15N(4)(R)@10                                                                              | missed R-I@2                 | -0.0116951  | 1112.62    | 371.8806 | 1112.63171 | 371.884522 | 3 | 10 | 13.9377 | 2.26  |
| 22 | 45.72 | 47.76 | 72.9 BCKDK_FlexII | 99.0 YLQQLPVR                                       | Label: 13C(6)15N(4)(R)@9                                                                                                                          |                              | 7.39E-05    | 1154.63245 | 578.3235 | 1154.63232 | 578.323425 | 2 | 12 | 16.8915 | 2.26  |
| 22 | 45.72 | 47.76 | 72.9 BCKDK_FlexII | 99.0 YPTFLYK                                        | Label: 13C(6)15N(2)(K)@7                                                                                                                          | cleaved I-Y@N-term           | -0.00165037 | 938.497681 | 470.2561 | 938.499329 | 470.256928 | 2 | 9  | 18.0092 | 2.26  |
| 22 | 45.72 | 47.76 | 72.9 BCKDK_FlexII | 99.0 YPTFLYK                                        | Label: 13C(6)15N(2)(K)@7                                                                                                                          | cleaved I-Y@N-term           | 0.00020099  | 938.499451 | 470.257  | 938.499329 | 470.256928 | 2 | 9  | 17.9008 | 2.26  |
| 22 | 45.72 | 47.76 | 72.9 BCKDK_FlexII | 99.0 YPTFLYK                                        | Label: 13C(6)15N(2)(K)@7                                                                                                                          | cleaved I-Y@N-term           | -0.00091407 | 938.498474 | 470.2565 | 938.499329 | 470.256928 | 2 | 9  | 17.7612 | 2.26  |
| 23 | 45.66 | 47.98 | 57.7 YYI_FlexII   | 99.0 DIDHETVVEEQIIGENSPDYSEYMTGK                    | Deamidated(Q)@11; Label: 13C(6)15N(2)(K)@28                                                                                                       |                              | 0.018594    | 3203.44141 | 1068.821 | 3203.42188 | 1068.81458 | 3 | 22 | 18.501  | 12.87 |
| 23 | 45.66 | 47.98 | 57.7 YYI_FlexII   | 99.0 EEVVGDDSDGLR                                   | Label: 13C(6)15N(4)(R)@13                                                                                                                         |                              | 0.00127757  | 1356.60461 | 679.3096 | 1356.60327 | 679.30889  | 2 | 11 | 15.4313 | 12.87 |
| 23 | 45.66 | 47.98 | 57.7 YYI_FlexII   | 99.0 EEVVGDDSDGLRAEDGFEDQILPVPAPAGGDDDYIEQTLVTVAAGK | Label: 13C(6)15N(4)(R)@13; Deamidated(Q)@21; Label: 13C(6)15N(2)(K)@49                                                                            | missed R-A@13                | 0.0199057   | 5032.41455 | 1259.111 | 5032.39551 | 1109.54077 | 4 | 18 | 20.4066 | 12.87 |
| 23 | 45.66 | 47.98 | 57.7 YYI_FlexII   | 99.0 FAQSTNLK                                       | Label: 13C(6)15N(2)(K)@8                                                                                                                          |                              | -0.00113738 | 915.489052 | 458.752  | 915.49054  | 458.752533 | 2 | 9  | 14.5533 | 12.87 |
| 23 | 45.66 | 47.98 | 57.7 YYI_FlexII   | 99.0 FSLDFNLR                                       | Label: 13C(6)15N(4)(R)@8                                                                                                                          |                              | -0.00146959 | 1020.52527 | 511.2699 | 1020.52679 | 511.270691 | 2 | 10 | 19.2465 | 12.87 |
| 23 | 45.66 | 47.98 | 57.7 YYI_FlexII   | 99.0 HOLVHTGEKPFQCTFEGCGK                           | Label: 13C(6)15N(2)(K)@9; Propionamide(C)@13; Propionamide(C)@18; Label: 13C(6)15N(2)(K)@20                                                       |                              | -0.0080203  | 2403.1355  | 802.0524 | 2403.14356 | 802.055115 | 3 | 20 | 15.8774 | 12.87 |
| 23 | 45.66 | 47.98 | 57.7 YYI_FlexII   | 99.0 HOLVHTGEKPFQCTFEGCGKR                          | Label: 13C(6)15N(2)(K)@9; Propionamide(C)@13; Propionamide(C)@18; Label: 13C(6)15N(2)(K)@20; Label: 13C(6)15N(4)(R)@21 missed K-R@20              |                              | -0.0131881  | 2569.2395  | 857.4205 | 2569.25293 | 857.424866 | 3 | 16 | 15.4545 | 12.87 |
| 23 | 45.66 | 47.98 | 57.7 YYI_FlexII   | 99.0 IHTGDRPYVCPFDGCKNK                             | Label: 13C(6)15N(4)(R)@6; Propionamide(C)@10; Propionamide(C)@15; Label: 13C(6)15N(2)(K)@17; Label: 13C(6)15N(2)(K)@18 missed K-K@17              |                              | 0.00042508  | 2217.06738 | 1109.541 | 2217.0669  | 1109.54077 | 2 | 23 | 15.5344 | 12.87 |
| 23 | 45.66 | 47.98 | 57.7 YYI_FlexII   | 99.0 KIKEDAPR                                       | Label: 13C(6)15N(2)(K)@1; Label: 13C(6)15N(2)(K)@3; Label: 13C(6)15N(4)(R)@9                                                                      | missed K-I@1; missed K-E@3   | -0.0113401  | 1096.59729 | 366.5397 | 1096.60864 | 366.543518 | 3 | 9  | 7.4642  | 12.87 |
| 23 | 45.66 | 47.98 | 57.7 YYI_FlexII   | 99.0 KLPPGIPGIDLSDPK                                | Label: 13C(6)15N(2)(K)@1; Label: 13C(6)15N(2)(K)@16                                                                                               | missed K-L@1                 | -0.00137479 | 1618.92517 | 540.649  | 1618.92651 | 540.649475 | 3 | 14 | 17.9481 | 12.87 |
| 23 | 45.66 | 47.98 | 57.7 YYI_FlexII   | 99.0 KSYLSGGAGAAGGGADPGNK                           | Label: 13C(6)15N(2)(K)@1; Label: 13C(6)15N(2)(K)@21                                                                                               | missed K-S@1                 | 0.00335784  | 1806.8866  | 603.3028 | 1806.88318 | 603.301636 | 3 | 19 | 14.4297 | 12.87 |
| 23 | 45.66 | 47.98 | 57.7 YYI_FlexII   | 99.0 KSYLSGGAGAAGGGADPGNKK                          | Label: 13C(6)15N(2)(K)@1; Label: 13C(6)15N(2)(K)@21; Label: 13C(6)15N(2)(K)@22                                                                    | missed K-S@1; missed K-K@21  | -0.00365479 | 1942.98889 | 648.6702 | 1942.99231 | 648.671387 | 3 | 25 | 13.9333 | 12.87 |
| 23 | 45.66 | 47.98 | 57.7 YYI_FlexII   | 99.0 LPPGIPGIDLSDPK                                 | Label: 13C(6)15N(2)(K)@15                                                                                                                         |                              | -0.0112963  | 1482.80603 | 742.4103 | 1482.81738 | 742.415955 | 2 | 11 | 18.5121 | 12.87 |
| 23 | 45.66 | 47.98 | 57.7 YYI_FlexII   | 99.0 RFSLDFNLR                                      | Label: 13C(6)15N(4)(R)@1; Label: 13C(6)15N(4)(R)@9                                                                                                | missed R-F@1                 | -0.0105436  | 1186.62573 | 594.3201 | 1186.63623 | 594.325378 | 2 | 13 | 18.5567 | 12.87 |
| 23 | 45.66 | 47.98 | 57.7 YYI_FlexII   | 99.0 RHQLVHTGEKPFQCTFEGCGKR                         | Label: 13C(6)15N(4)(R)@1; Label: 13C(6)15N(2)(K)@10; Deamidated(Q)@13; Propionamide(C)@14; Propionamide(C)@19; Label: missed R-H@1; missed K-R@21 |                              | 0.0293285   | 2736.37573 | 457.0699 | 2736.34619 | 457.064972 | 6 | 12 | 15.3058 | 12.87 |
| 23 | 45.66 | 47.98 | 57.7 YYI_FlexII   | 99.0 SYLSGGAGAAGGGADPGNK                            | Label: 13C(6)15N(2)(K)@20                                                                                                                         |                              | -0.00058217 | 1670.77344 | 836.394  | 1670.77393 | 836.394287 | 2 | 22 | 15.1034 | 12.87 |
| 23 | 45.66 | 47.98 | 57.7 YYI_FlexII   | 99.0 SYLSGGAGAAGGGADPGNKK                           | Label: 13C(6)15N(2)(K)@20; Label: 13C(6)15N(2)(K)@21                                                                                              | missed K-K@20                | -0.00012117 | 1806.88294 | 603.3016 | 1806.88318 | 603.301636 | 3 | 15 | 14.6916 | 12.87 |
| 23 | 45.66 | 47.98 | 57.7 YYI_FlexII   | 99.0 SYLSGGAGAAGGGADPGNKKWEQK                       | Label: 13C(6)15N(2)(K)@20; Label: 13C(6)15N(2)(K)@21; Label: 13C(6)15N(2)(K)@25                                                                   | missed K-K@20; missed K-W@21 | 0.00670464  | 2386.17969 | 796.4005 | 2386.17285 | 796.398193 | 3 | 14 | 15.2213 | 12.87 |
| 23 | 45.66 | 47.98 | 57.7 YYI_FlexII   | 99.0 TLEGEFSVTMWSSDEK                               | Label: 13C(6)15N(2)(K)@16                                                                                                                         |                              | -0.00137748 | 1852.82666 | 927.4206 | 1852.828   | 927.421326 | 2 | 17 | 19.0538 | 12.87 |
| 23 | 45.66 | 47.98 | 57.7 YYI_FlexII   | 99.0 TLEGEFSVTMWSSDEK                               | Label: 13C(6)15N(2)(K)@16; Label: 13C(6)15N(2)(K)@17                                                                                              | missed K-K@16                | -0.0184946  | 1988.91882 | 663.9802 | 1988.93726 | 663.986328 | 3 | 13 | 18.4777 | 12.87 |
| 23 | 45.66 | 47.98 | 57.7 YYI_FlexII   | 99.0 TLEGEFSVTMWSSDEKIDHIDHETVVEEQIIGENSPDYSEYMTGK  | Label: 13C(6)15N(2)(K)@16; Label: 13C(6)15N(2)(K)@17; Deamidated(Q)@28; Label: 13C(6)15N(2)(K)@45                                                 | missed K-K@16; missed K-D@17 | 0.0190304   | 5174.36865 | 1035.881 | 5174.34863 | 1035.87695 | 5 | 14 | 19.1467 | 12.87 |
| 23 | 45.66 | 47.98 | 57.7 YYI_FlexII   | 99.0 VHVCAECGK                                      | Propionamide(C)@4; Propionamide(C)@7; Label: 13C(6)15N(2)(K)@9                                                                                    |                              | -0.00130099 | 1094.50794 | 548.2612 | 1094.50928 | 548.261902 | 2 | 11 | 11.9627 | 12.87 |
| 23 | 45.66 | 47.98 | 57.7 YYI_FlexII   | 99.0 EEVVGDDSDGLRAEDGFEDQILPVPAPAGGDDDYIEQTLVTVAAGK | Label: 13C(6)15N(4)(R)@13; Deamidated(Q)@21; Label: 13C(6)15N(2)(K)@49                                                                            | missed R-A@13                | 0.021764    | 5032.41895 | 1007.491 | 5032.39551 | 1007.48639 | 5 | 13 | 20.4646 | 12.87 |
| 23 | 45.66 | 47.98 | 57.7 YYI_FlexII   | 99.0 FAQSTNLK                                       | Label: 13C(6)15N(2)(K)@8                                                                                                                          |                              | -0.00034393 | 915.490295 | 458.7524 | 915.49054  | 458.752533 | 2 | 9  | 14.289  | 12.87 |
| 23 | 45.66 | 47.98 | 57.7 YYI_FlexII   | 99.0 FAQSTNLK                                       |                                                                                                                                                   |                              | -0.00074536 | 907.475647 | 454.7451 | 907.476318 | 454.745453 | 2 | 9  | 14.3366 | 12.87 |
| 23 | 45.66 | 47.98 | 57.7 YYI_FlexII   | 99.0 FSLDFNLR                                       | Label: 13C(6)15N(4)(R)@8                                                                                                                          |                              | 0.00054457  | 1020.52728 | 511.2709 | 1020.52679 | 511.270691 | 2 | 9  | 19.5113 | 12.87 |
| 23 | 45.66 | 47.98 | 57.7 YYI_FlexII   | 99.0 FSLDFNLR                                       |                                                                                                                                                   |                              | 0.00678308  | 1010.52527 | 506.2699 | 1010.51856 | 506.266541 | 2 | 9  | 19.3183 | 12.87 |
| 23 | 45.66 | 47.98 | 57.7 YYI_FlexII   | 99.0 HOLVHTGEKPFQCTFEGCGK                           | Label: 13C(6)15N(2)(K)@9; Deamidated(Q)@12; Propionamide(C)@13; Propionamide(C)@18; Label: 13C(6)15N(2)(K)@20                                     |                              | 0.00372061  | 2404.13135 | 602.0401 | 2404.12744 | 602.039124 | 4 | 15 | 15.9398 |       |

|    |       |       |                    |                                       |                                                                                                                                                |                                  |             |            |          |            |            |   |    |         |       |
|----|-------|-------|--------------------|---------------------------------------|------------------------------------------------------------------------------------------------------------------------------------------------|----------------------------------|-------------|------------|----------|------------|------------|---|----|---------|-------|
| 23 | 45.66 | 47.98 | 57.7 YY1_FlexIil   | 99.0 RFLSDFNLRL                       | Label: 13C(6)15N(4)(R) @ 1; Label: 13C(6)15N(4)(R) @ 9                                                                                         | missed R-F @ 1                   | -0.00874627 | 1186.62732 | 396.5497 | 1186.63623 | 396.552673 | 3 | 11 | 18.567  | 12.87 |
| 23 | 45.66 | 47.98 | 57.7 YY1_FlexIil   | 99.0 SYLSSGAGAAAGGGADPGNKK            | Label: 13C(6)15N(2)(K) @ 20; Label: 13C(6)15N(2)(K) @ 21                                                                                       | missed K-K @ 20                  | 0.00351362  | 1806.88672 | 904.4506 | 1806.88319 | 904.448853 | 2 | 21 | 14.7586 | 12.87 |
| 23 | 45.66 | 47.98 | 57.7 YY1_FlexIil   | 99.0 SYLSSGAGAAAGGGADPGNKWVEQK        | Label: 13C(6)15N(2)(K) @ 20; Label: 13C(6)15N(2)(K) @ 21; Label: 13C(6)15N(2)(K) @ 25                                                          | missed K-K @ 20; missed K-W @ 21 | -0.00156882 | 2386.17139 | 597.5501 | 2386.17285 | 597.550476 | 4 | 11 | 15.2094 | 12.87 |
| 23 | 45.66 | 47.98 | 57.7 YY1_FlexIil   | 99.0 VHVCAECGK                        | Propionamide(C) @ 4; Propionamide(C) @ 7; Label: 13C(6)15N(2)(K) @ 9                                                                           |                                  | -0.00028592 | 1094.50952 | 548.262  | 1094.50928 | 548.261902 | 2 | 13 | 11.4343 | 12.87 |
| 23 | 45.66 | 47.98 | 57.7 YY1_FlexIil   | 99.0 VHVCAECGK                        | Propionamide(C) @ 4; Propionamide(C) @ 7; Label: 13C(6)15N(2)(K) @ 9                                                                           |                                  | 0.00028592  | 1094.50952 | 548.262  | 1094.50928 | 548.261902 | 2 | 11 | 11.6997 | 12.87 |
| 23 | 45.66 | 47.98 | 57.7 YY1_FlexIil   | 99.0 VHVCAECGK                        | Propionamide(C) @ 4; Propionamide(C) @ 7; Label: 13C(6)15N(2)(K) @ 9                                                                           |                                  | -0.0037424  | 1094.50549 | 548.26   | 1094.50928 | 548.261902 | 2 | 9  | 11.1763 | 12.87 |
| 23 | 45.66 | 47.98 | 57.7 YY1_FlexIil   | 99.0 VHVCAECGK                        | Propionamide(C) @ 4; Propionamide(C) @ 7; Label: 13C(6)15N(2)(K) @ 9                                                                           |                                  | -0.0119243  | 1094.49719 | 365.8397 | 1094.50928 | 365.843689 | 3 | 10 | 11.5125 | 12.87 |
| 23 | 45.66 | 47.98 | 57.7 YY1_FlexIil   | 99.0 VHVCAECGK                        | Propionamide(C) @ 4; Propionamide(C) @ 7; Label: 13C(6)15N(2)(K) @ 9                                                                           |                                  | -0.00084641 | 1094.50842 | 365.8434 | 1094.50928 | 365.843689 | 3 | 9  | 11.7706 | 12.87 |
| 23 | 45.66 | 47.98 | 57.7 YY1_FlexIil   | 99.0 VHVCAECGK                        | Propionamide(C) @ 4; Propionamide(C) @ 7; Label: 13C(6)15N(2)(K) @ 9                                                                           |                                  | -0.00084641 | 1094.50842 | 365.8434 | 1094.50928 | 365.843689 | 3 | 8  | 12.3888 | 12.87 |
| 23 | 45.66 | 47.98 | 57.7 YY1_FlexIil   | 99.0 VHVCAECGK                        | Propionamide(C) @ 4; Propionamide(C) @ 7; Label: 13C(6)15N(2)(K) @ 9                                                                           |                                  | -0.0119243  | 1094.49719 | 365.8397 | 1094.50928 | 365.843689 | 3 | 9  | 11.2371 | 12.87 |
| 23 | 45.66 | 47.98 | 57.7 YY1_FlexIil   | 99.0 VHVCAECGK                        | Propionamide(C) @ 7; Label: 13C(6)15N(2)(K) @ 9                                                                                                |                                  | -0.020366   | 1094.50708 | 365.843  | 1094.50928 | 365.843689 | 3 | 8  | 12.0464 | 12.87 |
| 23 | 45.66 | 47.98 | 57.7 YY1_FlexIil   | 99.0 YPTFLYK                          | Label: 13C(6)15N(2)(K) @ 7                                                                                                                     | cleaved Q-Y @ N-term             | -0.00165037 | 938.497681 | 470.2561 | 938.499329 | 470.256928 | 2 | 9  | 18.0092 | 12.87 |
| 23 | 45.66 | 47.98 | 57.7 YY1_FlexIil   | 99.0 YPTFLYK                          | Label: 13C(6)15N(2)(K) @ 7                                                                                                                     | cleaved Q-Y @ N-term             | 0.00020099  | 938.499451 | 470.257  | 938.499329 | 470.256928 | 2 | 9  | 17.9008 | 12.87 |
| 23 | 45.66 | 47.98 | 57.7 YY1_FlexIil   | 99.0 YPTFLYK                          | Label: 13C(6)15N(2)(K) @ 7                                                                                                                     | cleaved Q-Y @ N-term             | -0.00091407 | 938.498474 | 470.2565 | 938.499329 | 470.256928 | 2 | 9  | 17.7612 | 12.87 |
| 24 | 45.3  | 47.31 | 60.7 WNT7A_FlexIil | 99.0 AICQSRPDAIIVIGEGSQMGLDECQFOFR    | Propionamide(C) @ 3; Label: 13C(6)15N(4)(R) @ 6; Propionamide(C) @ 24; Label: 13C(6)15N(4)(R) @ 29                                             |                                  | -0.0116187  | 3372.60523 | 1125.209 | 3372.6167  | 1125.21289 | 3 | 22 | 20.1091 | 13.38 |
| 24 | 45.3  | 47.31 | 60.7 WNT7A_FlexIil | 99.0 CHGVSGSCTTK                      | Propionamide(C) @ 1; Propionamide(C) @ 8; Label: 13C(6)15N(2)(K) @ 11                                                                          |                                  | -0.00040891 | 1228.54138 | 410.5211 | 1228.54199 | 410.521271 | 3 | 13 | 7.3838  | 13.38 |
| 24 | 45.3  | 47.31 | 60.7 WNT7A_FlexIil | 99.0 DKYNEAVHVEPVR                    | Label: 13C(6)15N(2)(K) @ 2; Label: 13C(6)15N(4)(R) @ 13                                                                                        | missed K-Y @ 2                   | -0.0139401  | 1572.78748 | 525.2698 | 1572.80151 | 525.274475 | 3 | 14 | 14.9719 | 13.38 |
| 24 | 45.3  | 47.31 | 60.7 WNT7A_FlexIil | 99.0 EAAFTYAIAGVAHAITAACQGNLSGDCGCKEK | Propionamide(C) @ 21; Deamidated(Q) @ 23; Propionamide(C) @ 29; Propionamide(C) @ 31; Label: 13C(6)15N(2)(K) @ 33; Label: 13C(6)15N(4)(R) @ 33 |                                  | 0.0135747   | 3742.77515 | 1248.599 | 3742.76123 | 1248.59436 | 3 | 16 | 20.3875 | 13.38 |
| 24 | 45.3  | 47.31 | 60.7 WNT7A_FlexIil | 99.0 ELGYVLK                          | Label: 13C(6)15N(2)(K) @ 7                                                                                                                     |                                  | -0.00037836 | 828.483276 | 415.2489 | 828.483643 | 415.249115 | 2 | 7  | 16.968  | 13.38 |
| 24 | 45.3  | 47.31 | 60.7 WNT7A_FlexIil | 99.0 FHWCCYVK                         | Propionamide(C) @ 4; Propionamide(C) @ 5; Label: 13C(6)15N(2)(K) @ 8                                                                           |                                  | -0.0127927  | 1234.53784 | 412.5199 | 1234.55066 | 412.52417  | 3 | 10 | 17.2944 | 13.38 |
| 24 | 45.3  | 47.31 | 60.7 WNT7A_FlexIil | 99.0 GYNTHQYAR                        | Label: 13C(6)15N(4)(R) @ 9                                                                                                                     |                                  | 9.71E-05    | 1118.51343 | 560.264  | 1118.51331 | 560.263916 | 2 | 11 | 12.714  | 13.38 |
| 24 | 45.3  | 47.31 | 60.7 WNT7A_FlexIil | 99.0 IGGSSVVALLGASIIKNKIPLAPR         | Propionamide(C) @ 16; Deamidated(N) @ 17; Label: 13C(6)15N(2)(K) @ 18; Label: 13C(6)15N(4)(R) @ 25                                             | missed K-I @ 18                  | 0.0156259   | 2529.42651 | 844.1494 | 2529.41089 | 844.144226 | 3 | 11 | 20.5398 | 13.38 |
| 24 | 45.3  | 47.31 | 60.7 WNT7A_FlexIil | 99.0 IKKPLSYR                         | Label: 13C(6)15N(2)(K) @ 2; Label: 13C(6)15N(2)(K) @ 3; Label: 13C(6)15N(4)(R) @ 8                                                             | missed K-K @ 2                   | -0.00944346 | 1029.64502 | 515.8298 | 1029.65454 | 515.834534 | 2 | 9  | 13.5042 | 13.38 |
| 24 | 45.3  | 47.31 | 60.7 WNT7A_FlexIil | 99.0 KILEENMK                         | Label: 13C(6)15N(2)(K) @ 1; Label: 13C(6)15N(2)(K) @ 8                                                                                         | missed K-I @ 1                   | -0.00054556 | 1019.56506 | 510.7898 | 1019.56561 | 510.79007  | 2 | 12 | 14.2024 | 13.38 |
| 24 | 45.3  | 47.31 | 60.7 WNT7A_FlexIil | 99.0 KPMDTLVYIEK                      | Label: 13C(6)15N(2)(K) @ 1; Label: 13C(6)15N(2)(K) @ 12                                                                                        |                                  | -0.0216589  | 1466.74451 | 734.3795 | 1466.76611 | 734.390381 | 2 | 19 | 16.9408 | 13.38 |
| 24 | 45.3  | 47.31 | 60.7 WNT7A_FlexIil | 99.0 QGGYHRDEGWK                      | Gln->pyro-Glu @ N-term; Label: 13C(6)15N(4)(R) @ 6; Label: 13C(6)15N(2)(K) @ 11                                                                | missed R-D @ 6                   | -0.00120533 | 1403.63245 | 702.8235 | 1403.63379 | 702.824158 | 2 | 15 | 14.62   | 13.38 |
| 24 | 45.3  | 47.31 | 60.7 WNT7A_FlexIil | 99.0 SPNYCEEDPVTGVSQTQGR              | Propionamide(C) @ 5; Label: 13C(6)15N(4)(R) @ 19                                                                                               |                                  | -0.00497239 | 2075.90332 | 1038.959 | 2075.90942 | 1038.96191 | 2 | 24 | 16.2247 | 13.38 |
| 24 | 45.3  | 47.31 | 60.7 WNT7A_FlexIil | 99.0 TAPQASGCDLMCCGR                  | Propionamide(C) @ 8; Propionamide(C) @ 12; Propionamide(C) @ 13; Label: 13C(6)15N(4)(R) @ 15                                                   |                                  | -0.00316975 | 1734.71533 | 868.3649 | 1734.71851 | 868.366516 | 2 | 16 | 16.3428 | 13.38 |
| 24 | 45.3  | 47.31 | 60.7 WNT7A_FlexIil | 99.0 TCWTTLPQFR                       | Propionamide(C) @ 2                                                                                                                            |                                  | 0.00569503  | 1322.6499  | 662.3322 | 1322.64417 | 662.329346 | 2 | 10 | 18.5815 | 13.38 |
| 24 | 45.3  | 47.31 | 60.7 WNT7A_FlexIil | 99.0 TLMNLHNEAGR                      | Label: 13C(6)15N(4)(R) @ 12                                                                                                                    |                                  | -0.00288225 | 1378.66223 | 690.3384 | 1378.66516 | 690.339444 | 2 | 14 | 15.1809 | 13.38 |
| 24 | 45.3  | 47.31 | 60.7 WNT7A_FlexIil | 99.0 TLMNLHNEAGRK                     | Label: 13C(6)15N(4)(R) @ 12; Label: 13C(6)15N(2)(K) @ 13                                                                                       | missed R-K @ 12                  | -0.00979639 | 1514.76453 | 758.3895 | 1514.77429 | 758.394409 | 2 | 14 | 14.6825 | 13.38 |
| 24 | 45.3  | 47.31 | 60.7 WNT7A_FlexIil | 99.0 WGGCSADIR                        | Propionamide(C) @ 4; Label: 13C(6)15N(4)(R) @ 9                                                                                                |                                  | 0.0006417   | 1044.46924 | 523.2419 | 1044.46863 | 523.241577 | 2 | 10 | 15.6866 | 13.38 |
| 24 | 45.3  | 47.31 | 60.7 WNT7A_FlexIil | 99.0 WNCALSGER                        | Propionamide(C) @ 3; Label: 13C(6)15N(4)(R) @ 9                                                                                                |                                  | -0.00079378 | 1115.50513 | 558.7598 | 1115.50574 | 558.760132 | 2 | 11 | 16.2273 | 13.38 |
| 24 | 45.3  | 47.31 | 60.7 WNT7A_FlexIil | 99.0 YIGIFAK                          | Label: 13C(6)15N(2)(K) @ 7                                                                                                                     |                                  | -0.00020986 | 762.415466 | 382.215  | 762.415588 | 382.215057 | 2 | 7  | 16.9157 | 13.38 |
| 24 | 45.3  | 47.31 | 60.7 WNT7A_FlexIil | 99.0 YNEAVHVEPVR                      | Label: 13C(6)15N(4)(R) @ 11                                                                                                                    |                                  | -0.00190827 | 1321.6637  | 661.8391 | 1321.66541 | 661.839966 | 2 | 16 | 15.1194 | 13.38 |
| 24 | 45.3  | 47.31 | 60.7 WNT7A_FlexIil | 99.0 AICQSRPDAIIVIGEGSQMGLDECQFOFR    | Propionamide(C) @ 3; Label: 13C(6)15N(4)(R) @ 6; Deamidated(Q) @ 18; Oxidation(M) @ 19; Propionamide(C) @ 24; Label: 13C(6)15N(4)(R) @ 29      |                                  | 0.0195618   | 3389.61523 | 1130.879 | 3389.5957  | 1130.87256 | 3 | 21 | 18.8748 | 13.38 |
| 24 | 45.3  | 47.31 | 60.7 WNT7A_FlexIil | 99.0 AICQSRPDAIIVIGEGSQMGLDECQFOFR    | Propionamide(C) @ 3; Label: 13C(6)15N(4)(R) @ 6; Deamidated(Q) @ 18; Propionamide(C) @ 24; Label: 13C(6)15N(4)(R) @ 29                         |                                  | 0.0246281   | 3373.6205  | 1125.549 | 3373.60083 | 1125.54089 | 3 | 24 | 19.1883 | 13.38 |
| 24 | 45.3  | 47.31 | 60.7 WNT7A_FlexIil | 99.0 AICQSRPDAIIVIGEGSQMGLDECQFOFR    | Propionamide(C) @ 3; Label: 13C(6)15N(4)(R) @ 6; Deamidated(Q) @ 18; Propionamide(C) @ 24; Label: 13C(6)15N(4)(R) @ 29                         |                                  | 0.00753386  | 3373.60864 | 844.4094 | 3373.60083 | 844.407471 | 4 | 17 | 19.1905 | 13.38 |
| 24 | 45.3  | 47.31 | 60.7 WNT7A_FlexIil | 99.0 AICQSRPDAIIVIGEGSQMGLDECQFOFR    | Propionamide(C) @ 3; Label: 13C(6)15N(4)(R) @ 6; Propionamide(C) @ 24; Label: 13C(6)15N(4)(R) @ 29                                             |                                  | -0.00173106 | 3372.61426 | 1125.212 | 3372.6167  | 1125.21289 | 3 | 26 | 19.4587 | 13.38 |
| 24 | 45.3  | 47.31 | 60.7 WNT7A_FlexIil | 99.0 CHGVSGSCTTK                      | Propionamide(C) @ 1; Propionamide(C) @ 8; Label: 13C(6)15N(2)(K) @ 11                                                                          |                                  | 0.00014041  | 1228.54211 | 410.5213 | 1228.54199 | 410.521271 | 3 | 11 | 7.6435  | 13.38 |
| 24 | 45.3  | 47.31 | 60.7 WNT7A_FlexIil | 99.0 DKYNEAVHVEPVR                    | Label: 13C(6)15N(2)(K) @ 2; Label: 13C(6)15N(4)(R) @ 13                                                                                        | missed K-Y @ 2                   | 0.00912675  | 1572.81055 | 394.2099 | 1572.80151 | 394.207672 | 4 | 11 | 14.9522 | 13.38 |
| 24 | 45.3  | 47.31 | 60.7 WNT7A_FlexIil | 99.0 DKYNEAVHVEPVR                    | Label: 13C(6)15N(2)(K) @ 2; Label: 13C(6)15N(4)(R) @ 13                                                                                        | missed K-Y @ 2                   | 0.00181132  | 1572.80322 | 787.4089 | 1572.80151 | 787.40802  | 2 | 20 | 14.9629 | 13.38 |
| 24 | 45.3  | 47.31 | 60.7 WNT7A_FlexIil | 99.0 DKYNEAVHVEPVR                    | Label: 13C(6)15N(2)(K) @ 2; Label: 13C(6)15N(4)(R) @ 13                                                                                        | missed K-Y @ 2                   | -2.85E-05   | 1572.80139 | 394.2076 | 1572.80151 | 394.207672 | 4 | 11 | 15.2177 | 13.38 |
| 24 | 45.3  | 47.31 | 60.7 WNT7A_FlexIil | 99.0 DKYNEAVHVEPVR                    | Label: 13C(6)15N(2)(K) @ 2; Label: 13C(6)15N(4)(R) @ 13                                                                                        | missed K-Y @ 2                   | 0.0160891   | 1572.81751 | 525.2798 | 1572.80151 | 525.274475 | 3 | 14 | 15.2403 | 13.38 |
| 24 | 45.3  | 47.31 | 60.7 WNT7A_FlexIil | 99.0 DKYNEAVHVEPVR                    | Label: 13C(6)15N(2)(K) @ 2; Deamidated(N) @ 4; Label: 13C(6)15N(4)(R) @ 13                                                                     | missed K-Y @ 2                   | 0.0219405   | 1573.80725 | 525.6097 | 1573.78552 | 525.602478 | 3 | 10 | 15.5059 | 13.38 |
| 24 | 45.3  | 47.31 | 60.7 WNT7A_FlexIil | 99.0 FHWCCYVK                         | Propionamide(C) @ 4; Propionamide(C) @ 5; Label: 13C(6)15N(2)(K) @ 8                                                                           |                                  | -0.00586079 | 1234.54492 | 618.2797 | 1234.55066 | 618.282654 | 2 | 10 | 17.3359 | 13.38 |
| 24 | 45.3  | 47.31 | 60.7 WNT7A_FlexIil | 99.0 KPMDTLVYIEK                      | Label: 13C(6)15N(2)(K) @ 1; Label: 13C(6)15N(2)(K) @ 12                                                                                        |                                  | 0.00146897  | 1466.76758 | 489.9298 | 1466.76611 | 489.929321 | 3 | 14 | 16.992  | 13.38 |
| 24 | 45.3  | 47.31 | 60.7 WNT7A_FlexIil | 99.0 KPMDTLVYIEK                      | Label: 13C(6)15N(2)(K) @ 1; Label: 13C(6)15N(2)(K) @ 12                                                                                        |                                  | -0.00041872 | 1466.76563 | 734.3901 | 1466.76611 | 734.390381 | 2 | 19 | 17.2093 | 13.38 |
| 24 | 45.3  | 47.31 | 60.7 WNT7A_FlexIil | 99.0 KPMDTLVYIEK                      | Label: 13C(6)15N(2)(K) @ 1; Oxidation(M) @ 3; Label: 13C(6)15N(2)(K) @ 12                                                                      |                                  | 0.00745439  | 1482.76843 | 742.3915 | 1482.76111 | 742.387817 | 2 | 10 | 16.4835 | 13.38 |
| 24 | 45.3  | 47.31 | 60.7 WNT7A_FlexIil | 99.0 QGGYHRDEGWK                      | Label: 13C(6)15N(4)(R) @ 6; Label: 13C(6)15N(2)(K) @ 11                                                                                        | missed R-D @ 6                   | 0.00432889  | 1420.66467 | 711.3396 | 1420.66028 | 711.337402 | 2 | 15 | 13.1241 | 13.38 |
| 24 | 45.3  | 47.31 | 60.7 WNT7A_FlexIil | 99.0 SPNYCEEDPVTGVSQTQGR              | Propionamide(C) @ 5; Label: 13C(6)15N(4)(R) @ 19                                                                                               |                                  | -0.00472825 | 2075.90527 | 1038.96  | 2075.90942 | 1038.96191 | 2 | 26 | 15.9542 | 13.38 |
| 24 | 45.3  | 47.31 | 60.7 WNT7A_FlexIil | 99.0 SPNYCEEDPVTGVSQTQGR              | Propionamide(C) @ 5; Label: 13C(6)15N(4)(R) @ 19                                                                                               |                                  | 0.00747438  | 2075.91699 | 692.9796 | 2075.90942 | 692.977051 | 3 | 20 | 16.0187 | 13.38 |
| 24 | 45.3  | 47.31 | 60.7 WNT7A_FlexIil | 99.0 TAPQASGCDLMCCGR                  | Propionamide(C) @ 8; Propionamide(C) @ 12; Propionamide(C) @ 13; Label: 13C(6)15N(4)(R) @ 15                                                   |                                  | -0.0182697  | 1734.71668 | 868.3656 | 1734.71851 | 868.366516 | 2 | 16 | 16.0634 | 13.38 |
| 24 | 45.3  | 47.31 | 60.7 WNT7A_FlexIil | 99.0 TAPQASGCDLMCCGR                  | Propionamide(C) @ 8; Propionamide(C) @ 12; Propionamide(C) @ 13; Label: 13C(6)15N(4)(R) @ 15                                                   |                                  | 0.00878874  | 1734.7273  | 579.2497 | 1734.71851 | 579.246765 | 3 | 15 | 16.1404 | 13.38 |
| 24 | 45.3  | 47.31 | 60.7 WNT7A_FlexIil | 99.0 TCWTTLPQFR                       | Propionamide(C) @ 2; Label: 13C(6)15N(4)(R) @ 10                                                                                               |                                  | -0.00771322 | 1332.6449  | 667.3297 | 1332.65247 | 667.333496 | 2 | 10 | 18.4743 |       |

|    |       |       |                    |                                           |                                                                                                                                                      |                               |                               |             |            |            |            |            |         |         |         |       |
|----|-------|-------|--------------------|-------------------------------------------|------------------------------------------------------------------------------------------------------------------------------------------------------|-------------------------------|-------------------------------|-------------|------------|------------|------------|------------|---------|---------|---------|-------|
| 24 | 45.3  | 47.31 | 60.7 WNT7A_FlexIII | 99.0 YPTFLYK                              | Label: 13C(6)15N(2)(K)@7                                                                                                                             | -0.00165037                   | 938.497681                    | 470.2561    | 938.499329 | 470.256928 | 2          | 9          | 18.0092 | 13.38   |         |       |
| 24 | 45.3  | 47.31 | 60.7 WNT7A_FlexIII | 99.0 YPTFLYK                              | Label: 13C(6)15N(2)(K)@7                                                                                                                             | 0.00020099                    | 938.499451                    | 470.257     | 938.499329 | 470.256928 | 2          | 9          | 17.9008 | 13.38   |         |       |
| 24 | 45.3  | 47.31 | 60.7 WNT7A_FlexIII | 99.0 YPTFLYK                              | Label: 13C(6)15N(2)(K)@7                                                                                                                             | -0.00091407                   | 938.498474                    | 470.2565    | 938.499329 | 470.256928 | 2          | 9          | 17.7612 | 13.38   |         |       |
| 25 | 44.51 | 46.56 | 50.8 CDK7_FlexII   | 99.0 APELLFGAR                            | Label: 13C(6)15N(4)(R)@9                                                                                                                             | -0.00112379                   | 982.546448                    | 492.2805    | 982.547546 | 492.281036 | 2          | 11         | 18.5014 | 10.08   |         |       |
| 25 | 44.51 | 46.56 | 50.8 CDK7_FlexII   | 99.0 AYTHQVVTR                            | Label: 13C(6)15N(4)(R)@9                                                                                                                             | 0.00207309                    | 1083.57202                    | 542.7933    | 1083.57007 | 542.792297 | 2          | 14         | 12.8832 | 10.08   |         |       |
| 25 | 44.51 | 46.56 | 50.8 CDK7_FlexII   | 99.0 DKNTNQIVAIAK                         | Label: 13C(6)15N(2)(K)@2; Label: 13C(6)15N(2)(K)@11                                                                                                  | 0.00685811                    | 1258.72852                    | 630.3715    | 1258.72156 | 630.368103 | 2          | 17         | 15.3542 | 10.08   |         |       |
| 25 | 44.51 | 46.56 | 50.8 CDK7_FlexII   | 99.0 DKNTNQIVAIAK                         | Label: 13C(6)15N(2)(K)@2; Label: 13C(6)15N(2)(K)@11; Label: 13C(6)15N(2)(K)@12                                                                       | missled K-N@2                 | missled K-N@2; missled K-K@11 | -0.00179796 | 1394.8291  | 698.4218   | 1394.83081 | 698.422669 | 2       | 18      | 14.3047 | 10.08 |
| 25 | 44.51 | 46.56 | 50.8 CDK7_FlexII   | 99.0 DLKPNMLLDENGVLK                      | Label: 13C(6)15N(2)(K)@3; Deamidated(N)@12; Label: 13C(6)15N(2)(K)@16                                                                                | 0.00951053                    | 1811.01062                    | 906.5126    | 1811.0011  | 906.507813 | 2          | 17         | 18.3857 | 10.08   |         |       |
| 25 | 44.51 | 46.56 | 50.8 CDK7_FlexII   | 99.0 IFETLGTPTTEQWPMCSLPDYVTFK            | Deamidated(Q)@12; Propionamide(C)@17; Label: 13C(6)15N(2)(K)@26                                                                                      | 0.0342864                     | 3126.46704                    | 1043.163    | 3126.43335 | 1043.15173 | 3          | 14         | 20.2504 | 10.08   |         |       |
| 25 | 44.51 | 46.56 | 50.8 CDK7_FlexII   | 99.0 ITATQALK                             | Label: 13C(6)15N(2)(K)@8                                                                                                                             | -0.00111826                   | 852.514893                    | 427.2647    | 852.515991 | 427.265289 | 2          | 10         | 14.9089 | 10.08   |         |       |
| 25 | 44.51 | 46.56 | 50.8 CDK7_FlexII   | 99.0 KLIFYPTFLYK                          | Label: 13C(6)15N(2)(K)@1; Label: 13C(6)15N(2)(K)@11                                                                                                  | -0.00094641                   | 1447.84412                    | 724.9293    | 1447.84497 | 724.92981  | 2          | 18         | 19.3361 | 10.08   |         |       |
| 25 | 44.51 | 46.56 | 50.8 CDK7_FlexII   | 99.0 KRTEALEQGGLPK                        | Label: 13C(6)15N(2)(K)@1; Label: 13C(6)15N(4)(R)@2; Label: 13C(6)15N(2)(K)@13                                                                        | missled K-R@1; missled R-T@2  | -0.00145943                   | 1451.82922  | 726.9219   | 1451.83069 | 726.922607 | 2          | 15      | 14.445  | 10.08   |       |
| 25 | 44.51 | 46.56 | 50.8 CDK7_FlexII   | 99.0 LADFLGAK                             | Label: 13C(6)15N(2)(K)@8                                                                                                                             | -0.00103478                   | 841.477844                    | 421.7462    | 841.478882 | 421.746735 | 2          | 10         | 17.4427 | 10.08   |         |       |
| 25 | 44.51 | 46.56 | 50.8 CDK7_FlexII   | 99.0 LDFLGEGQFATVYK                       | Label: 13C(6)15N(2)(K)@14                                                                                                                            | -0.00302458                   | 1594.80933                    | 798.4119    | 1594.81226 | 798.413391 | 2          | 16         | 19.1375 | 10.08   |         |       |
| 25 | 44.51 | 46.56 | 50.8 CDK7_FlexII   | 99.0 LLQELSHPNILGLDAFGHK                  | Label: 13C(6)15N(2)(K)@20                                                                                                                            | -0.0145147                    | 2222.21582                    | 556.5612    | 2222.23023 | 556.564819 | 4          | 16         | 20.2897 | 10.08   |         |       |
| 25 | 44.51 | 46.56 | 50.8 CDK7_FlexII   | 99.0 NTNQIVAIAK                           | Label: 13C(6)15N(2)(K)@9; Label: 13C(6)15N(2)(K)@10                                                                                                  | -9.44E-05                     | 1143.6947                     | 572.8546    | 1143.6947  | 572.854614 | 2          | 13         | 14.6413 | 10.08   |         |       |
| 25 | 44.51 | 46.56 | 50.8 CDK7_FlexII   | 99.0 RTEALEQGGLPK                         | Label: 13C(6)15N(4)(R)@1; Label: 13C(6)15N(2)(K)@12                                                                                                  | missled R-T@1                 | -0.00279273                   | 1315.71875  | 439.5802   | 1315.72144 | 439.581116 | 3          | 12      | 15.2992 | 10.08   |       |
| 25 | 44.51 | 46.56 | 50.8 CDK7_FlexII   | 99.0 RYEKLDLFLGEGQFATVYK                  | Label: 13C(6)15N(4)(R)@1; Label: 13C(6)15N(2)(K)@4; Label: 13C(6)15N(2)(K)@18                                                                        | missled R-Y@1; missled K-L@4  | 0.00706255                    | 2189.14404  | 730.7219   | 2189.13672 | 730.719544 | 3          | 19      | 18.1969 | 10.08   |       |
| 25 | 44.51 | 46.56 | 50.8 CDK7_FlexII   | 99.0 TEALEQGGLPKK                         | Label: 13C(6)15N(2)(K)@11; Label: 13C(6)15N(2)(K)@12                                                                                                 | missled K-K@11                | 0.00729768                    | 1285.72864  | 643.8716   | 1285.72131 | 643.86792  | 2          | 14      | 14.663  | 10.08   |       |
| 25 | 44.51 | 46.56 | 50.8 CDK7_FlexII   | 99.0 WYRAPELLFGAR                         | Label: 13C(6)15N(4)(R)@3; Label: 13C(6)15N(4)(R)@12                                                                                                  | missled R-A@3                 | -0.00841078                   | 1497.79114  | 500.271    | 1497.79956 | 500.273804 | 3          | 13      | 18.7595 | 10.08   |       |
| 25 | 44.51 | 46.56 | 50.8 CDK7_FlexII   | 99.0 YEKLDLFLGEGQFATVYK                   | Label: 13C(6)15N(2)(K)@3; Label: 13C(6)15N(2)(K)@17                                                                                                  | missled K-L@3                 | 0.00011313                    | 2023.02747  | 1012.521   | 2023.02734 | 1012.52094 | 2          | 25      | 18.7202 | 10.08   |       |
| 25 | 44.51 | 46.56 | 50.8 CDK7_FlexII   | 99.0 YFSNRPGPPTPGCLRPNPCPVETLKEQSNPALAIK  | Label: 13C(6)15N(4)(R)@5; Propionamide(C)@12; Label: 13C(6)15N(4)(R)@16; Propionamide(C)@19; Label: 13C(6)15N(2)(K)@2f                               | missled K-E@25                | 0.00909076                    | 4000.06299  | 1001.023   | 4000.05371 | 1001.02069 | 4          | 12      | 17.2186 | 10.08   |       |
| 25 | 44.51 | 46.56 | 50.8 CDK7_FlexII   | 99.0 EQSNPALAIKR                          | Label: 13C(6)15N(2)(K)@10; Label: 13C(6)15N(4)(R)@11                                                                                                 | missled K-R@10                | 0.00802584                    | 1243.7085   | 622.8615   | 1243.70032 | 622.857483 | 2          | 10      | 14.9768 | 10.08   |       |
| 25 | 44.51 | 46.56 | 50.8 CDK7_FlexII   | 99.0 YFSNRPGPPTPGCLRPNPCPVETLKEQSNPALAIKR | Label: 13C(6)15N(4)(R)@5; Propionamide(C)@12; Label: 13C(6)15N(4)(R)@16; Deamidated(N)@18; Propionamide(C)@19; Label: missled K-E@25; missled K-R@35 | 0.0280612                     | 4167.17529                    | 834.4423    | 4167.14697 | 834.436707 | 5          | 12         | 16.6266 | 10.08   |         |       |
| 25 | 44.51 | 46.56 | 50.8 CDK7_FlexII   | 99.0 APELLFGAR                            | Label: 13C(6)15N(4)(R)@9                                                                                                                             | 0.00046313                    | 982.548096                    | 492.2813    | 982.547546 | 492.281036 | 2          | 11         | 18.221  | 10.08   |         |       |
| 25 | 44.51 | 46.56 | 50.8 CDK7_FlexII   | 99.0 APELLFGAR                            | Label: 13C(6)15N(4)(R)@9                                                                                                                             | -0.00149986                   | 972.537903                    | 487.2762    | 972.539246 | 487.276917 | 2          | 11         | 18.3053 | 10.08   |         |       |
| 25 | 44.51 | 46.56 | 50.8 CDK7_FlexII   | 99.0 APELLFGAR                            | Label: 13C(6)15N(4)(R)@9                                                                                                                             | 0.00107349                    | 982.548845                    | 492.2816    | 982.547546 | 492.281036 | 2          | 9          | 22.125  | 10.08   |         |       |
| 25 | 44.51 | 46.56 | 50.8 CDK7_FlexII   | 99.0 APELLFGAR                            | Label: 13C(6)15N(4)(R)@9                                                                                                                             | -0.00014722                   | 982.547485                    | 492.281     | 982.547546 | 492.281036 | 2          | 10         | 19.7049 | 10.08   |         |       |
| 25 | 44.51 | 46.56 | 50.8 CDK7_FlexII   | 99.0 APELLFGAR                            | Label: 13C(6)15N(4)(R)@9                                                                                                                             | 0.00046313                    | 982.548096                    | 492.2813    | 982.547546 | 492.281036 | 2          | 9          | 21.464  | 10.08   |         |       |
| 25 | 44.51 | 46.56 | 50.8 CDK7_FlexII   | 99.0 AYTHQVVTR                            | Label: 13C(6)15N(4)(R)@9                                                                                                                             | 0.00256138                    | 1083.57263                    | 542.7936    | 1083.57007 | 542.792297 | 2          | 13         | 12.6239 | 10.08   |         |       |
| 25 | 44.51 | 46.56 | 50.8 CDK7_FlexII   | 99.0 AYTHQVVTR                            | Label: 13C(6)15N(4)(R)@9                                                                                                                             | 0.00261255                    | 1073.56445                    | 537.7895    | 1073.56177 | 537.788147 | 2          | 11         | 12.8895 | 10.08   |         |       |
| 25 | 44.51 | 46.56 | 50.8 CDK7_FlexII   | 99.0 AYTHQVVTR                            | Label: 13C(6)15N(4)(R)@9                                                                                                                             | -0.00232146                   | 1083.56763                    | 542.7911    | 1083.57007 | 542.792297 | 2          | 11         | 13.2515 | 10.08   |         |       |
| 25 | 44.51 | 46.56 | 50.8 CDK7_FlexII   | 99.0 DKNTNQIVAIAK                         | Label: 13C(6)15N(2)(K)@2; Label: 13C(6)15N(2)(K)@11                                                                                                  | missled K-N@2                 | 0.00685811                    | 1258.72852  | 630.3715   | 1258.72156 | 630.368103 | 2          | 13      | 15.6145 | 10.08   |       |
| 25 | 44.51 | 46.56 | 50.8 CDK7_FlexII   | 99.0 DKNTNQIVAIAK                         | Label: 13C(6)15N(2)(K)@2; Label: 13C(6)15N(2)(K)@11                                                                                                  | missled K-N@2                 | -0.00139174                   | 1258.72022  | 420.5807   | 1258.72156 | 420.581146 | 3          | 11      | 15.3483 | 10.08   |       |
| 25 | 44.51 | 46.56 | 50.8 CDK7_FlexII   | 99.0 DKNTNQIVAIAK                         | Label: 13C(6)15N(2)(K)@2; Label: 13C(6)15N(2)(K)@11                                                                                                  | missled K-N@2                 | -0.00194106                   | 1258.71973  | 420.5805   | 1258.72156 | 420.581146 | 3          | 10      | 15.6123 | 10.08   |       |
| 25 | 44.51 | 46.56 | 50.8 CDK7_FlexII   | 99.0 DKNTNQIVAIAK                         | Label: 13C(6)15N(2)(K)@2; Label: 13C(6)15N(2)(K)@11; Label: 13C(6)15N(2)(K)@12                                                                       | missled K-N@2; missled K-K@11 | -0.00179796                   | 1394.8291   | 698.4218   | 1394.83081 | 698.422669 | 2          | 16      | 14.5718 | 10.08   |       |
| 25 | 44.51 | 46.56 | 50.8 CDK7_FlexII   | 99.0 DKNTNQIVAIAK                         | Label: 13C(6)15N(2)(K)@2; Label: 13C(6)15N(2)(K)@11; Label: 13C(6)15N(2)(K)@12                                                                       | missled K-N@2; missled K-K@11 | -0.00031267                   | 1394.83032  | 465.9507   | 1394.83081 | 465.950867 | 3          | 13      | 14.2745 | 10.08   |       |
| 25 | 44.51 | 46.56 | 50.8 CDK7_FlexII   | 99.0 DKNTNQIVAIAK                         | Label: 13C(6)15N(2)(K)@2; Label: 13C(6)15N(2)(K)@11; Label: 13C(6)15N(2)(K)@12                                                                       | missled K-N@2; missled K-K@11 | 5.35E-05                      | 1394.83081  | 465.9509   | 1394.83081 | 465.950867 | 3          | 12      | 14.5452 | 10.08   |       |
| 25 | 44.51 | 46.56 | 50.8 CDK7_FlexII   | 99.0 DKNTNQIVAIAK                         | Label: 13C(6)15N(2)(K)@2; Label: 13C(6)15N(2)(K)@11; Label: 13C(6)15N(2)(K)@12                                                                       | missled K-N@2; missled K-K@11 | -0.0182366                    | 1394.8125   | 349.7104   | 1394.83081 | 349.714966 | 4          | 10      | 14.277  | 10.08   |       |
| 25 | 44.51 | 46.56 | 50.8 CDK7_FlexII   | 99.0 DKNTNQIVAIAK                         | Label: 13C(6)15N(2)(K)@2; Label: 13C(6)15N(2)(K)@11; Label: 13C(6)15N(2)(K)@12                                                                       | missled K-N@2; missled K-K@11 | -0.0182366                    | 1394.8125   | 349.7104   | 1394.83081 | 349.714966 | 4          | 10      | 14.5465 | 10.08   |       |
| 25 | 44.51 | 46.56 | 50.8 CDK7_FlexII   | 99.0 DLKPNMLLDENGVLK                      | Label: 13C(6)15N(2)(K)@3; Label: 13C(6)15N(2)(K)@16                                                                                                  | -0.0146361                    | 1810.00232                    | 604.3414    | 1810.01709 | 604.346314 | 3          | 14         | 18.3441 | 10.08   |         |       |
| 25 | 44.51 | 46.56 | 50.8 CDK7_FlexII   | 99.0 ITATQALK                             | Label: 13C(6)15N(2)(K)@8                                                                                                                             | -0.0005079                    | 852.515591                    | 427.265     | 852.515991 | 427.265289 | 2          | 9          | 15.183  | 10.08   |         |       |
| 25 | 44.51 | 46.56 | 50.8 CDK7_FlexII   | 99.0 KLIFYPTFLYK                          | Label: 13C(6)15N(2)(K)@1; Label: 13C(6)15N(2)(K)@11                                                                                                  | -0.00082434                   | 1447.84424                    | 724.9294    | 1447.84497 | 724.92981  | 2          | 17         | 19.6059 | 10.08   |         |       |
| 25 | 44.51 | 46.56 | 50.8 CDK7_FlexII   | 99.0 KLIFYPTFLYK                          | Label: 13C(6)15N(2)(K)@1; Label: 13C(6)15N(2)(K)@11                                                                                                  | missled K-L@1                 | -0.00403877                   | 1447.84094  | 483.6209   | 1447.84497 | 483.622284 | 3          | 11      | 19.3151 | 10.08   |       |
| 25 | 44.51 | 46.56 | 50.8 CDK7_FlexII   | 99.0 KRTEALEQGGLPK                        | Label: 13C(6)15N(2)(K)@1; Label: 13C(6)15N(4)(R)@2; Label: 13C(6)15N(2)(K)@13                                                                        | missled K-R@1; missled R-T@2  | 0.00039207                    | 1451.83118  | 484.951    | 1451.83069 | 484.950836 | 3          | 12      | 14.4117 | 10.08   |       |
| 25 | 44.51 | 46.56 | 50.8 CDK7_FlexII   | 99.0 LADFLGAK                             | Label: 13C(6)15N(2)(K)@8                                                                                                                             | -0.00103478                   | 841.477844                    | 421.7462    | 841.478882 | 421.746735 | 2          | 10         | 17.1807 | 10.08   |         |       |
| 25 | 44.51 | 46.56 | 50.8 CDK7_FlexII   | 99.0 LADFLGAK                             | Label: 13C(6)15N(2)(K)@14                                                                                                                            | 0.0020856                     | 833.466858                    | 417.7407    | 833.464722 | 417.739624 | 2          | 9          | 17.3775 | 10.08   |         |       |
| 25 | 44.51 | 46.56 | 50.8 CDK7_FlexII   | 99.0 LDFLGEGQFATVYK                       | Label: 13C(6)15N(2)(K)@14                                                                                                                            | -0.00074583                   | 1594.8114                     | 532.6111    | 1594.81226 | 532.611389 | 3          | 15         | 19.2662 | 10.08   |         |       |
| 25 | 44.51 | 46.56 | 50.8 CDK7_FlexII   | 99.0 LDFLGEGQFATVYK                       | Label: 13C(6)15N(2)(K)@14                                                                                                                            | 0.00014926                    | 1594.8125                     | 798.4135    | 1594.81226 | 798.413391 | 2          | 16         | 19.4102 | 10.08   |         |       |
| 25 | 44.51 | 46.56 | 50.8 CDK7_FlexII   | 99.0 LDFLGEGQFATVYK                       | Label: 13C(6)15N(2)(K)@14                                                                                                                            | -0.00826605                   | 1586.78992                    | 794.4022    | 1586.7981  | 794.406311 | 2          | 14         | 19.2322 | 10.08   |         |       |
| 25 | 44.51 | 46.56 | 50.8 CDK7_FlexII   | 99.0 LDFLGEGQFATVYK                       | Label: 13C(6)15N(2)(K)@14                                                                                                                            | -0.00290251                   | 1594.80933                    | 798.4119    | 1594.81226 | 798.413391 | 2          | 14         | 19.6857 | 10.08   |         |       |
| 25 | 44.51 | 46.56 | 50.8 CDK7_FlexII   | 99.0 LDFLGEGQFATVYK                       | Label: 13C(6)15N(2)(K)@14                                                                                                                            | 0.0101591                     | 1594.82251                    | 798.4185    | 1594.81226 | 798.413391 | 2          | 11         | 19.9489 | 10.08   |         |       |
| 25 | 44.51 | 46.56 | 50.8 CDK7_FlexII   | 99.0 LDFLGEGQFATVYK                       | Label: 13C(6)15N(2)(K)@14                                                                                                                            | -0.00253629                   | 1594.80969                    | 798.4121    | 1594.81226 | 798.413391 | 2          | 11         | 20.4678 | 10.08   |         |       |
| 25 | 44.51 | 46.56 | 50.8 CDK7_FlexII   | 99.0 LLQELSHPNILGLDAFGHK                  | Label: 13C(6)15N(2)(K)@20                                                                                                                            | 0.0037144                     | 2222.23413                    | 741.752     | 2222.23023 | 741.750732 | 3          | 16         | 20.3401 | 10.08   |         |       |
| 25 | 44.51 | 46.56 | 50.8 CDK7_FlexII   | 99.0 NTNQIVAIAK                           | Label: 13C(6)15N(2)(K)@9; Label: 13C(6)15N(2)(K)@10                                                                                                  | missled K-K@9                 | 0.00511409                    | 1143.69971  | 382.2405   | 1143.6947  | 382.238831 | 3          | 10      | 14.6643 | 10.08   |       |
| 25 | 44.51 | 46.56 | 50.8 CDK7_FlexII   | 99.0 TEALEQGGLPKK                         | Label: 13C(6)15N(2)(K)@11; Label: 13C(6)15N(2)(K)@12                                                                                                 | missled K-K@11                | -0.00122684                   | 1285.71997  | 429.5806   | 1285.72131 | 429.581024 | 3          | 12      | 14.684  | 10.08   |       |
| 25 | 44.51 | 46.56 | 50.8 CDK7_FlexII   | 99.0 YEKLDLFLGEGQFATVYK                   | Label: 13C(6)15N(2)(K)@3; Label: 13C(6)15N(2)(K)@17                                                                                                  | 0.00580986                    | 2023.0332                     | 675.3517    | 2023.02734 | 675.349731 | 3          | 16         | 18.9365 | 10.08   |         |       |
| 25 | 44.51 | 46.56 | 50.8 CDK7_FlexII   | 99.0 YEKLDLFLGEGQFATVYK                   | Label: 13C(6)15N(2)(K)@3; Deamidated(Q)@11; Label: 13C(6)                                                                                            |                               |                               |             |            |            |            |            |         |         |         |       |

|    |    |       |                    |                                      |                                                                                                                             |                             |             |            |          |            |            |   |    |         |       |
|----|----|-------|--------------------|--------------------------------------|-----------------------------------------------------------------------------------------------------------------------------|-----------------------------|-------------|------------|----------|------------|------------|---|----|---------|-------|
| 26 | 44 | 46.07 | 49.5 ORC4L_FlexIII | 99.0 IALKEITR                        | Label: 13C(6)15N(2)(K)@4; Label: 13C(6)15N(4)(R)@8                                                                          | missed K-E@4                | -0.00106258 | 960.607666 | 481.3111 | 960.608704 | 481.311615 | 2 | 9  | 15.5454 | 13.72 |
| 26 | 44 | 46.07 | 49.5 ORC4L_FlexIII | 99.0 IFKEQLSLPAEFPDKVFAEK            | Label: 13C(6)15N(2)(K)@3; Label: 13C(6)15N(2)(K)@15; Label: 13C(6)15N(2)(K)@20                                              | missed K-E@3; missed K-V@15 | 0.0128266   | 2359.30176 | 787.4412 | 2359.28906 | 787.436951 | 3 | 17 | 18.5106 | 13.72 |
| 26 | 44 | 46.07 | 49.5 ORC4L_FlexIII | 99.0 KAHSVYNFEKPVVMK                 | Label: 13C(6)15N(2)(K)@1; Label: 13C(6)15N(2)(K)@10; Label: 13C(6)15N(2)(K)@15                                              | missed K-A@1                | 0.00018266  | 1799.98218 | 451.0028 | 1799.98181 | 451.002747 | 4 | 18 | 15.6625 | 13.72 |
| 26 | 44 | 46.07 | 49.5 ORC4L_FlexIII | 99.0 KAHSVYNFEKPVVMKAFEHLOQLELIKPMER | Label: 13C(6)15N(4)(R)@1; Label: 13C(6)15N(2)(K)@10; Label: 13C(6)15N(2)(K)@15; Deamidated(Q)@21; Label: 13C(6)15N(2)(K)@15 | missed K-A@1; missed K-A@15 | -0.00381874 | 3782.01953 | 757.4112 | 3782.02319 | 757.411926 | 5 | 12 | 19.0061 | 13.72 |
| 26 | 44 | 46.07 | 49.5 ORC4L_FlexIII | 99.0 LDILELLEK                       | Label: 13C(6)15N(2)(K)@9                                                                                                    |                             | -0.00446341 | 1092.64771 | 547.3311 | 1092.65222 | 547.333374 | 2 | 12 | 20.395  | 13.72 |
| 26 | 44 | 46.07 | 49.5 ORC4L_FlexIII | 99.0 LLLDNTQIMNALQK                  | Label: 13C(6)15N(2)(K)@14                                                                                                   |                             | -0.00736535 | 1621.88782 | 811.9512 | 1621.89526 | 811.954895 | 2 | 15 | 19.1172 | 13.72 |
| 26 | 44 | 46.07 | 49.5 ORC4L_FlexIII | 99.0 QIHLMNSFGFPQYVK                 | Gln->pyro-Glu@N-term                                                                                                        |                             | -0.134537   | 1790.88604 | 896.4413 | 1790.88147 | 896.447998 | 2 | 19 | 19.8428 | 13.72 |
| 26 | 44 | 46.07 | 49.5 ORC4L_FlexIII | 99.0 QSPHSNLFVGQVQYK                 | Gln->pyro-Glu@N-term; Label: 13C(6)15N(2)(K)@15                                                                             |                             | -0.00472351 | 1721.85693 | 861.9357 | 1721.86169 | 861.93811  | 2 | 19 | 18.2449 | 13.72 |
| 26 | 44 | 46.07 | 49.5 ORC4L_FlexIII | 99.0 RTALHGESNSVLIIGPR               | Label: 13C(6)15N(4)(R)@1; Label: 13C(6)15N(4)(R)@17                                                                         | missed R-T@1                | -0.1013418  | 1839.01184 | 614.0112 | 1839.02295 | 614.014954 | 3 | 19 | 15.5463 | 13.72 |
| 26 | 44 | 46.07 | 49.5 ORC4L_FlexIII | 99.0 SKSNSIHTECLSQVQR                | Label: 13C(6)15N(2)(K)@2; Propionamide(C)@11; Label: 13C(6)15N(4)(R)@17                                                     | missed K-S@2                | -0.0180607  | 2018.01538 | 505.5111 | 2018.03345 | 505.515625 | 4 | 12 | 15.6167 | 13.72 |
| 26 | 44 | 46.07 | 49.5 ORC4L_FlexIII | 99.0 SNSLIHTECLSQVQR                 | Propionamide(C)@9; Label: 13C(6)15N(4)(R)@15                                                                                |                             | -0.0080272  | 1794.89148 | 898.453  | 1794.89221 | 898.453369 | 2 | 20 | 16.139  | 13.72 |
| 26 | 44 | 46.07 | 49.5 ORC4L_FlexIII | 99.0 SVQEVLOK                        | Label: 13C(6)15N(2)(K)@8                                                                                                    |                             | 0.00179192  | 937.534302 | 469.7744 | 937.53241  | 469.773468 | 2 | 9  | 15.1669 | 13.72 |
| 26 | 44 | 46.07 | 49.5 ORC4L_FlexIII | 99.0 TALHGESNSVLIIGPR                |                                                                                                                             |                             | 0.00262838  | 1662.90784 | 832.4612 | 1662.90527 | 832.459961 | 2 | 11 | 17.1532 | 13.72 |
| 26 | 44 | 46.07 | 49.5 ORC4L_FlexIII | 99.0 TMLINHALK                       | Label: 13C(6)15N(2)(K)@9                                                                                                    |                             | -0.00114486 | 1047.5979  | 524.8062 | 1047.599   | 524.806824 | 2 | 11 | 15.803  | 13.72 |
| 26 | 44 | 46.07 | 49.5 ORC4L_FlexIII | 99.0 VTASHPFMTAVDLMEASQLCSMDSK       | Deamidated(Q)@18; Propionamide(C)@20; Label: 13C(6)15N(2)(K)@25                                                             |                             | 0.00563816  | 2778.2522  | 927.0913 | 2778.24634 | 927.089417 | 3 | 17 | 19.7338 | 13.72 |
| 26 | 44 | 46.07 | 49.5 ORC4L_FlexIII | 99.0 WNNENVQYLSedr                   | Label: 13C(6)15N(4)(R)@12                                                                                                   |                             | -0.0158399  | 1561.68787 | 781.8512 | 1561.70361 | 781.859131 | 2 | 14 | 17.2327 | 13.72 |
| 26 | 44 | 46.07 | 49.5 ORC4L_FlexIII | 99.0 YPNCPTDVR                       | Propionamide(C)@4; Label: 13C(6)15N(4)(R)@9                                                                                 |                             | 0.00020597  | 1144.52124 | 573.2679 | 1144.52112 | 573.267822 | 2 | 11 | 14.7912 | 13.72 |
| 26 | 44 | 46.07 | 49.5 ORC4L_FlexIII | 99.0 AFEHLOQLELIKPMER                | Deamidated(Q)@7; Label: 13C(6)15N(2)(K)@12; Label: 13C(6)15N(4)(R)@16                                                       |                             | 0.00323905  | 2000.0553  | 501.0211 | 2000.052   | 501.020264 | 4 | 12 | 17.9104 | 13.72 |
| 26 | 44 | 46.07 | 49.5 ORC4L_FlexIII | 99.0 AFEHLOQLELIKPMER                | Deamidated(Q)@7; Label: 13C(6)15N(2)(K)@12; Label: 13C(6)15N(4)(R)@16                                                       |                             | 0.0296957   | 2000.08167 | 667.7012 | 2000.0525  | 667.691284 | 3 | 12 | 17.9207 | 13.72 |
| 26 | 44 | 46.07 | 49.5 ORC4L_FlexIII | 99.0 AFEHLOQLELIKPMER                | Deamidated(Q)@7; Label: 13C(6)15N(2)(K)@12; Label: 13C(6)15N(4)(R)@16                                                       |                             | 0.0159912   | 2000.06751 | 1001.041 | 2000.052   | 1001.03326 | 2 | 12 | 17.9914 | 13.72 |
| 26 | 44 | 46.07 | 49.5 ORC4L_FlexIII | 99.0 AFEHLOQLELIKPMER                | Deamidated(Q)@7; Label: 13C(6)15N(2)(K)@12; Label: 13C(6)15N(4)(R)@16                                                       |                             | 0.025755    | 2000.07788 | 667.6999 | 2000.052   | 667.691284 | 3 | 11 | 17.9474 | 13.72 |
| 26 | 44 | 46.07 | 49.5 ORC4L_FlexIII | 99.0 AFEHLOQLELIKPMER                | Deamidated(Q)@7; Label: 13C(6)15N(2)(K)@12; Label: 13C(6)15N(4)(R)@16                                                       |                             | 0.0266465   | 2000.07837 | 667.7001 | 2000.052   | 667.691284 | 3 | 11 | 17.9845 | 13.72 |
| 26 | 44 | 46.07 | 49.5 ORC4L_FlexIII | 99.0 AHSVYNFEKPVVMK                  | Label: 13C(6)15N(2)(K)@9; Label: 13C(6)15N(2)(K)@14                                                                         |                             | -0.00115418 | 1663.87146 | 555.6311 | 1663.87268 | 555.631531 | 3 | 18 | 16.2068 | 13.72 |
| 26 | 44 | 46.07 | 49.5 ORC4L_FlexIII | 99.0 AHSVYNFEKPVVMK                  | Label: 13C(6)15N(2)(K)@9; Label: 13C(6)15N(2)(K)@14                                                                         |                             | -0.00478787 | 1663.86792 | 832.9412 | 1663.87268 | 832.943604 | 2 | 15 | 16.2334 | 13.72 |
| 26 | 44 | 46.07 | 49.5 ORC4L_FlexIII | 99.0 AHSVYNFEKPVVMK                  | Deamidated(N)@6; Label: 13C(6)15N(2)(K)@9; Label: 13C(6)15N(2)(K)@14                                                        |                             | 0.0384839   | 1664.89539 | 417.2311 | 1664.85669 | 417.221466 | 4 | 11 | 16.4852 | 13.72 |
| 26 | 44 | 46.07 | 49.5 ORC4L_FlexIII | 99.0 AHSVYNFEKPVVMK                  | Label: 13C(6)15N(2)(K)@9; Label: 13C(6)15N(2)(K)@14                                                                         |                             | 0.001117    | 1663.8739  | 555.6319 | 1663.87268 | 555.631531 | 3 | 14 | 16.3182 | 13.72 |
| 26 | 44 | 46.07 | 49.5 ORC4L_FlexIII | 99.0 EQLSLPAEFPDKVFAEK               | Label: 13C(6)15N(2)(K)@12; Label: 13C(6)15N(2)(K)@17                                                                        | missed K-V@12               | 0.00422982  | 1963.03137 | 655.3511 | 1963.02734 | 655.349731 | 3 | 15 | 18.5441 | 13.72 |
| 26 | 44 | 46.07 | 49.5 ORC4L_FlexIII | 99.0 HLSELLKR                        | Label: 13C(6)15N(2)(K)@7; Label: 13C(6)15N(4)(R)@8                                                                          | missed K-R@7                | 0.0164021   | 1012.63117 | 338.551  | 1012.61481 | 338.545563 | 3 | 10 | 14.7816 | 13.72 |
| 26 | 44 | 46.07 | 49.5 ORC4L_FlexIII | 99.0 HLSELLKR                        | Label: 13C(6)15N(2)(K)@7; Label: 13C(6)15N(4)(R)@8                                                                          | missed K-R@7                | 0.00175364  | 1012.61652 | 338.5461 | 1012.61481 | 338.545563 | 3 | 10 | 15.0439 | 13.72 |
| 26 | 44 | 46.07 | 49.5 ORC4L_FlexIII | 99.0 HLSELLKR                        | Label: 13C(6)15N(2)(K)@7; Label: 13C(6)15N(4)(R)@8                                                                          | missed K-R@7                | 0.00184309  | 1012.6167  | 507.3156 | 1012.61481 | 507.314697 | 2 | 10 | 15.0675 | 13.72 |
| 26 | 44 | 46.07 | 49.5 ORC4L_FlexIII | 99.0 HLSELLKR                        | Label: 13C(6)15N(2)(K)@7; Label: 13C(6)15N(4)(R)@8                                                                          | missed K-R@7                | 0.0164021   | 1012.63117 | 338.551  | 1012.61481 | 338.545563 | 3 | 11 | 15.3024 | 13.72 |
| 26 | 44 | 46.07 | 49.5 ORC4L_FlexIII | 99.0 HLSELLKR                        | Label: 13C(6)15N(2)(K)@7; Label: 13C(6)15N(4)(R)@8                                                                          | missed K-R@7                | 0.00111277  | 1012.61585 | 338.5459 | 1012.61481 | 338.545563 | 3 | 9  | 15.6046 | 13.72 |
| 26 | 44 | 46.07 | 49.5 ORC4L_FlexIII | 99.0 HLSELLKR                        | Label: 13C(6)15N(2)(K)@7; Label: 13C(6)15N(4)(R)@8                                                                          | missed K-R@7                | 0.00230295  | 1012.61707 | 338.5463 | 1012.61481 | 338.545563 | 3 | 9  | 26.5951 | 13.72 |
| 26 | 44 | 46.07 | 49.5 ORC4L_FlexIII | 99.0 HLSELLKR                        | Label: 13C(6)15N(2)(K)@7; Label: 13C(6)15N(4)(R)@8                                                                          | missed K-R@7                | 0.0130317   | 1012.62787 | 338.5499 | 1012.61481 | 338.545563 | 3 | 10 | 14.8348 | 13.72 |
| 26 | 44 | 46.07 | 49.5 ORC4L_FlexIII | 99.0 HLSELLKR                        | Label: 13C(6)15N(2)(K)@7; Label: 13C(6)15N(4)(R)@8                                                                          | missed K-R@7                | 0.00315166  | 1012.61798 | 338.5466 | 1012.61481 | 338.545563 | 3 | 10 | 14.8846 | 13.72 |
| 26 | 44 | 46.07 | 49.5 ORC4L_FlexIII | 99.0 IFKEQLSLPAEFPDKVFAEK            | Label: 13C(6)15N(2)(K)@3; Deamidated(Q)@5; Label: 13C(6)15N(2)(K)@15; Label: 13C(6)15N(2)(K)@20                             | missed K-E@3; missed K-V@15 | 0.0224964   | 2360.29565 | 591.0812 | 2360.27295 | 591.075501 | 4 | 12 | 18.4768 | 13.72 |
| 26 | 44 | 46.07 | 49.5 ORC4L_FlexIII | 99.0 KAHSVYNFEKPVVMK                 | Label: 13C(6)15N(2)(K)@1; Label: 13C(6)15N(2)(K)@10; Label: 13C(6)15N(2)(K)@15                                              | missed K-A@1                | -0.00785983 | 1799.97412 | 451.0008 | 1799.98181 | 451.002747 | 4 | 13 | 15.7719 | 13.72 |
| 26 | 44 | 46.07 | 49.5 ORC4L_FlexIII | 99.0 QIHLMNSFGFPQYVK                 | Label: 13C(6)15N(2)(K)@15                                                                                                   |                             | -0.00014319 | 1815.92188 | 606.3146 | 1815.92212 | 606.314636 | 3 | 16 | 18.7195 | 13.72 |
| 26 | 44 | 46.07 | 49.5 ORC4L_FlexIII | 99.0 QIHLMNSFGFPQYVK                 | Deamidated(Q)@1; Label: 13C(6)15N(2)(K)@15                                                                                  |                             | 0.0217294   | 1816.9281  | 909.4713 | 1816.90613 | 909.460388 | 2 | 12 | 18.724  | 13.72 |
| 26 | 44 | 46.07 | 49.5 ORC4L_FlexIII | 99.0 QIHLMNSFGFPQYVK                 | Label: 13C(6)15N(2)(K)@15                                                                                                   |                             | -0.0105802  | 1815.91187 | 606.3112 | 1815.92212 | 606.314636 | 3 | 15 | 18.9777 | 13.72 |
| 26 | 44 | 46.07 | 49.5 ORC4L_FlexIII | 99.0 QIHLMNSFGFPQYVK                 | Gln->pyro-Glu@N-term; Label: 13C(6)15N(2)(K)@15                                                                             |                             | -0.00762999 | 1798.88806 | 900.4513 | 1798.89563 | 900.455078 | 2 | 18 | 19.7141 | 13.72 |
| 26 | 44 | 46.07 | 49.5 ORC4L_FlexIII | 99.0 QIHLMNSFGFPQYVK                 | Gln->pyro-Glu@N-term; Label: 13C(6)15N(2)(K)@15                                                                             |                             | 0.00091494  | 1798.89673 | 900.4556 | 1798.89563 | 900.455078 | 2 | 20 | 19.9888 | 13.72 |
| 26 | 44 | 46.07 | 49.5 ORC4L_FlexIII | 99.0 QIHLMNSFGFPQYVK                 | Gln->pyro-Glu@N-term; Label: 13C(6)15N(2)(K)@15                                                                             |                             | -0.0127851  | 1798.88294 | 900.4487 | 1798.89563 | 900.455078 | 2 | 20 | 19.7994 | 13.72 |
| 26 | 44 | 46.07 | 49.5 ORC4L_FlexIII | 99.0 QIHLMNSFGFPQYVK                 | Gln->pyro-Glu@N-term; Label: 13C(6)15N(2)(K)@15                                                                             |                             | -0.010526   | 1798.88513 | 900.4498 | 1798.89563 | 900.455078 | 2 | 21 | 19.7936 | 13.72 |
| 26 | 44 | 46.07 | 49.5 ORC4L_FlexIII | 99.0 QIHLMNSFGFPQYVK                 | Label: 13C(6)15N(2)(K)@15                                                                                                   |                             | -0.0130219  | 1815.90906 | 606.3103 | 1815.92212 | 606.314636 | 3 | 13 | 18.7802 | 13.72 |
| 26 | 44 | 46.07 | 49.5 ORC4L_FlexIII | 99.0 QSPHSNLFVGQVQYK                 | Label: 13C(6)15N(2)(K)@15                                                                                                   |                             | -0.00026005 | 1738.88782 | 870.4512 | 1738.88818 | 870.451355 | 2 | 16 | 17.2102 | 13.72 |
| 26 | 44 | 46.07 | 49.5 ORC4L_FlexIII | 99.0 QSPHSNLFVGQVQYK                 | Label: 13C(6)15N(2)(K)@15                                                                                                   |                             | -0.0001664  | 1738.88794 | 580.6366 | 1738.88818 | 580.636658 | 3 | 14 | 17.2868 | 13.72 |
| 26 | 44 | 46.07 | 49.5 ORC4L_FlexIII | 99.0 QSPHSNLFVGQVQYK                 | Gln->pyro-Glu@N-term; Label: 13C(6)15N(2)(K)@15                                                                             |                             | 0.00626282  | 1721.86792 | 861.9412 | 1721.86169 | 861.93811  | 2 | 20 | 17.3481 | 13.72 |
| 26 | 44 | 46.07 | 49.5 ORC4L_FlexIII | 99.0 QSPHSNLFVGQVQYK                 | Deamidated(Q)@11; Label: 13C(6)15N(2)(K)@15                                                                                 |                             | 0.0157248   | 1739.88782 | 870.9512 | 1739.87219 | 870.94342  | 2 | 10 | 17.4751 | 13.72 |
| 26 | 44 | 46.07 | 49.5 ORC4L_FlexIII | 99.0 QSPHSNLFVGQVQYK                 | Gln->pyro-Glu@N-term; Label: 13C(6)15N(2)(K)@15                                                                             |                             | 0.00626282  | 1721.86792 | 861.9412 | 1721.86169 | 861.93811  | 2 | 21 | 17.9694 | 13.72 |
| 26 | 44 | 46.07 | 49.5 ORC4L_FlexIII | 99.0 QSPHSNLFVGQVQYK                 | Gln->pyro-Glu@N-term; Label: 13C(6)15N(2)(K)@15                                                                             |                             | 0.00294869  | 1721.86462 | 861.9396 | 1721.86169 | 861.93811  | 2 | 20 | 18.0922 | 13.72 |
| 26 | 44 | 46.07 | 49.5 ORC4L_FlexIII | 99.0 SKSNSIHTECLSQVQR                | Label: 13C(6)15N(2)(K)@2; Propionamide(C)@11; Label: 13C(6)15N(4)(R)@17                                                     | missed K-S@2                | 0.00802974  | 2018.04126 | 673.6877 | 2018.03345 | 673.685059 | 3 | 15 | 15.5945 | 13.72 |
| 26 | 44 | 46.07 | 49.5 ORC4L_FlexIII | 99.0 SNSLIHTECLSQVQR                 | Propionamide(C)@9; Label: 13C(6)15N(4)(R)@15                                                                                |                             | -0.00040389 | 1794.89209 | 599.3046 | 1794.89221 | 599.304688 | 3 | 15 | 16.1816 | 13.72 |
| 26 | 44 | 46.07 | 49.5 ORC4L_FlexIII | 99.0 SNSLIHTECLSQVQR                 | Propionamide(C)@9; Deamidated(Q)@12; Label: 13C(6)15N(4)(R)@15                                                              |                             | 0.00590475  | 1795.88232 | 898.9484 | 1795.87622 | 898.945374 | 2 | 16 | 16.4125 | 13.72 |
| 26 | 44 | 46.07 | 49.5 ORC4L_FlexIII | 99.0 SNSLIHTECLSQVQR                 | Propionamide(C)@9; Label: 13C(6)15N(4)(R)@15                                                                                |                             | 3.68E-05    | 1794.89233 | 898.4534 | 1794.89221 | 898.453369 | 2 | 19 | 16.2526 | 13.72 |
| 26 | 44 | 46.07 | 49.5 ORC4L_FlexIII | 99.0 TALHGESNSVLIIGPR                | Label: 13C(6)15N(4)(R)@16                                                                                                   |                             | -0.0120126  | 1672.90149 | 558.6411 | 1672.91357 | 558.645142 | 3 | 16 | 17.0472 | 13.72 |
| 26 | 44 | 46.07 | 49.5 ORC4L_FlexIII | 99.0 TALHGESNSVLIIGPR                | Label: 13C(6)15N(4)(R)@16                                                                                                   |                             | -0.00563656 | 1672.90784 | 837.4612 | 1672.91357 | 837.46405  | 2 | 21 | 17.0674 | 13.72 |
| 26 | 44 | 46.07 | 49.5 ORC4L_FlexIII | 99.0 TALHGESNSVLIIGPR                | Label: 13C(6)15N(4)(R)@                                                                                                     |                             |             |            |          |            |            |   |    |         |       |

|    |       |       |                    |                                            |                                                                                                                                |             |            |                      |            |            |   |    |         |       |
|----|-------|-------|--------------------|--------------------------------------------|--------------------------------------------------------------------------------------------------------------------------------|-------------|------------|----------------------|------------|------------|---|----|---------|-------|
| 26 | 44    | 46.07 | 49.5 ORC4L_FlexIII | 99.0 TALHGESNSVLIIGPR                      | Label: 13C(6)15N(4)(R)@ 16                                                                                                     | 0.0142649   | 1672.92786 | 558.6499             | 1672.91357 | 558.645142 | 3 | 15 | 17.089  | 13.72 |
| 26 | 44    | 46.07 | 49.5 ORC4L_FlexIII | 99.0 TALHGESNSVLIIGPR                      | Label: 13C(6)15N(4)(R)@ 16                                                                                                     | 0.0114376   | 1672.92505 | 837.4698             | 1672.91357 | 837.46405  | 2 | 17 | 17.1621 | 13.72 |
| 26 | 44    | 46.07 | 49.5 ORC4L_FlexIII | 99.0 TMLINHALK                             | Label: 13C(6)15N(2)(K)@ 9                                                                                                      | 0.00753059  | 1047.60645 | 524.8105             | 1047.599   | 524.806824 | 2 | 10 | 15.9109 | 13.72 |
| 26 | 44    | 46.07 | 49.5 ORC4L_FlexIII | 99.0 WNNVQYLSER                            | Label: 13C(6)15N(4)(R)@ 12                                                                                                     | -0.00204598 | 1561.70166 | 781.8581             | 1561.70361 | 781.859131 | 2 | 14 | 16.9718 | 13.72 |
| 26 | 44    | 46.07 | 49.5 ORC4L_FlexIII | 99.0 WNNVQYLSER                            | Label: 13C(6)15N(4)(R)@ 12                                                                                                     | -0.00214628 | 1561.70142 | 781.858              | 1561.70361 | 781.859131 | 2 | 14 | 17.0799 | 13.72 |
| 26 | 44    | 46.07 | 49.5 ORC4L_FlexIII | 99.0 YPTFLYK                               | Label: 13C(6)15N(2)(K)@ 7                                                                                                      | -0.00165037 | 938.497681 | 470.2561             | 938.499329 | 470.256928 | 2 | 9  | 18.0092 | 13.72 |
| 26 | 44    | 46.07 | 49.5 ORC4L_FlexIII | 99.0 YPTFLYK                               | Label: 13C(6)15N(2)(K)@ 7                                                                                                      |             |            | cleaved L-Y @ N-term |            |            |   |    |         |       |
| 26 | 44    | 46.07 | 49.5 ORC4L_FlexIII | 99.0 YPTFLYK                               | Label: 13C(6)15N(2)(K)@ 7                                                                                                      |             |            | cleaved L-Y @ N-term |            |            |   |    |         |       |
| 26 | 44    | 46.07 | 49.5 ORC4L_FlexIII | 99.0 YPTFLYK                               | Label: 13C(6)15N(2)(K)@ 7                                                                                                      |             |            | cleaved L-Y @ N-term |            |            |   |    |         |       |
| 29 | 42.79 | 44.97 | 59.5 PBK_FlexIII   | 99.0 AFTEANDGSLCLAMEYGGEEK                 | Propionamide(C) @ 11; Label: 13C(6)15N(2)(K) @ 20                                                                              | -0.00578261 | 2183.95337 | 1092.984             | 2183.95947 | 1092.98706 | 2 | 22 | 18.7878 | 17.23 |
| 29 | 42.79 | 44.97 | 59.5 PBK_FlexIII   | 99.0 ASDPFPAAIILK                          | Label: 13C(6)15N(2)(K)@ 13                                                                                                     | -0.00761305 | 1377.76733 | 689.8909             | 1377.77478 | 689.894653 | 2 | 15 | 19.4221 | 17.23 |
| 29 | 42.79 | 44.97 | 59.5 PBK_FlexIII   | 99.0 DRPSAAHVEALETDVYPTFLYK                | Label: 13C(6)15N(4)(R)@ 2; Label: 13C(6)15N(2)(K) @ 23                                                                         | -0.00378118 | 2652.35938 | 664.0971             | 2652.35547 | 664.09613  | 4 | 19 | 20.1488 | 17.23 |
| 29 | 42.79 | 44.97 | 59.5 PBK_FlexIII   | 99.0 EAVEENGWITDK                          | Deamidated(N) @ 6; Label: 13C(6)15N(2)(K) @ 12                                                                                 | -0.00157929 | 1311.62683 | 656.8207             | 1311.62854 | 656.821533 | 2 | 14 | 15.0557 | 17.23 |
| 29 | 42.79 | 44.97 | 59.5 PBK_FlexIII   | 99.0 GLSHSPWAVK                            | Label: 13C(6)15N(2)(K)@ 10                                                                                                     | -0.0014067  | 1088.58447 | 545.2995             | 1088.58582 | 545.300171 | 2 | 14 | 16.3748 | 17.23 |
| 29 | 42.79 | 44.97 | 59.5 PBK_FlexIII   | 99.0 GLSHSPWAVK                            | Label: 13C(6)15N(2)(K)@ 10; Label: 13C(6)15N(2)(K) @ 11                                                                        | -0.00209936 | 1224.69312 | 409.2383             | 1224.69495 | 409.238953 | 3 | 13 | 15.16   | 17.23 |
| 29 | 42.79 | 44.97 | 59.5 PBK_FlexIII   | 99.0 ICDVGVSLPLDENMTVTDPEACYIGTEPWPKPK     | Propionamide(C) @ 2; Propionamide(C) @ 22; Label: 13C(6)15N(2)(K) @ 30; Label: 13C(6)15N(2)(K) @ 32                            | 0.00108484  | 3677.76514 | 1226.929             | 3677.76392 | 1226.92859 | 3 | 19 | 19.2452 | 17.23 |
| 29 | 42.79 | 44.97 | 59.5 PBK_FlexIII   | 99.0 KINPICNDHYR                           | Label: 13C(6)15N(2)(K) @ 1; Propionamide(C) @ 6; Label: 13C(6)15N(4)(R) @ 11                                                   | -0.00403296 | 1460.7232  | 731.3709             | 1460.73132 | 731.372925 | 2 | 14 | 14.3939 | 17.23 |
| 29 | 42.79 | 44.97 | 59.5 PBK_FlexIII   | 99.0 KKSVCSTPTINIPASPFMQK                  | Label: 13C(6)15N(2)(K) @ 1; Label: 13C(6)15N(2)(K) @ 2; Propionamide(C) @ 6; Label: 13C(6)15N(2)(K) @ 21                       | -0.00883221 | 2384.29346 | 597.0806             | 2384.30225 | 597.082825 | 4 | 12 | 18.2056 | 17.23 |
| 29 | 42.79 | 44.97 | 59.5 PBK_FlexIII   | 99.0 KSVLCSTPTINIPASPFMQK                  | Label: 13C(6)15N(2)(K) @ 1; Propionamide(C) @ 5; Deamidated(N) @ 11; Label: 13C(6)15N(2)(K) @ 20                               | 0.0240217   | 2249.20117 | 750.741              | 2249.177   | 750.732971 | 3 | 14 | 18.6196 | 17.23 |
| 29 | 42.79 | 44.97 | 59.5 PBK_FlexIII   | 99.0 LGFGTGVNVYLMK                         | Label: 13C(6)15N(2)(K) @ 13                                                                                                    | 0.0152996   | 1405.76733 | 703.8909             | 1405.75195 | 703.88324  | 2 | 18 | 19.9472 | 17.23 |
| 29 | 42.79 | 44.97 | 59.5 PBK_FlexIII   | 99.0 LGFGTGVNVYLMKR                        | Label: 13C(6)15N(2)(K) @ 13; Label: 13C(6)15N(4)(R) @ 14                                                                       |             |            | missed K-R @ 13      |            |            |   |    |         |       |
| 29 | 42.79 | 44.97 | 59.5 PBK_FlexIII   | 99.0 SLHHPNIVGYR                           | Label: 13C(6)15N(4)(R) @ 11                                                                                                    | -0.0008231  | 1301.68591 | 434.9026             | 1301.68677 | 434.902893 | 3 | 12 | 15.2029 | 17.23 |
| 29 | 42.79 | 44.97 | 59.5 PBK_FlexIII   | 99.0 SLNDLIEER                             | Label: 13C(6)15N(4)(R) @ 9                                                                                                     | -0.00041348 | 1097.55884 | 549.7867             | 1097.5592  | 549.786865 | 2 | 12 | 17.6846 | 17.23 |
| 29 | 42.79 | 44.97 | 59.5 PBK_FlexIII   | 99.0 SVLCSTPTINIPASPFMQK                   | Propionamide(C) @ 4; Label: 13C(6)15N(2)(K) @ 19                                                                               | -0.00048887 | 2112.08325 | 1057.049             | 2112.08398 | 1057.04919 | 2 | 21 | 19.1223 | 17.23 |
| 29 | 42.79 | 44.97 | 59.5 PBK_FlexIII   | 99.0 SVLCSTPTINIPASPFMQKLGFGTGVNVYLMKR     | Propionamide(C) @ 4; Deamidated(Q) @ 18; Label: 13C(6)15N(2)(K) @ 19; Label: 13C(6)15N(2)(K) @ 32; Label: 13C(6)15N(4)(R) @ 33 | 0.0177951   | 3666.93652 | 917.7414             | 3666.9187  | 917.736939 | 4 | 16 | 20.0613 | 17.23 |
| 29 | 42.79 | 44.97 | 59.5 PBK_FlexIII   | 99.0 VIELFSVCTNEDEPK                       | Propionamide(C) @ 6; Label: 13C(6)15N(2)(K) @ 14                                                                               | 0.00270478  | 1671.82971 | 836.9221             | 1671.8269  | 836.920715 | 2 | 16 | 18.7686 | 17.23 |
| 29 | 42.79 | 44.97 | 59.5 PBK_FlexIII   | 99.0 VIELFSVCTNEDEPKDRPSAAHVEALETDVYPTFLYK | Propionamide(C) @ 8; Deamidated(N) @ 10; Label: 13C(6)15N(2)(K) @ 14; Label: 13C(6)15N(4)(R) @ 16; Label: 13C(6)15N(2)(K) @ 37 | 0.0224113   | 4307.17871 | 1077.802             | 4307.15576 | 1077.79627 | 4 | 15 | 20.2117 | 17.23 |
| 29 | 42.79 | 44.97 | 59.5 PBK_FlexIII   | 99.0 YKASQDPFPAIILK                        | Label: 13C(6)15N(2)(K) @ 2; Label: 13C(6)15N(2)(K) @ 15                                                                        | 0.00056239  | 1676.94788 | 839.4812             | 1676.94727 | 839.480896 | 2 | 21 | 18.9098 | 17.23 |
| 29 | 42.79 | 44.97 | 59.5 PBK_FlexIII   | 99.0 AFTEANDGSLCLAMEYGGEEK                 | Propionamide(C) @ 11; Label: 13C(6)15N(2)(K) @ 20                                                                              | 0.00032092  | 2183.95947 | 1092.987             | 2183.95947 | 1092.98706 | 2 | 24 | 18.5119 | 17.23 |
| 29 | 42.79 | 44.97 | 59.5 PBK_FlexIII   | 99.0 AFTEANDGSLCLAMEYGGEEK                 | Deamidated(N) @ 6; Propionamide(C) @ 11; Label: 13C(6)15N(2)(K) @ 20                                                           | 0.0255852   | 2184.96924 | 1093.492             | 2184.9436  | 1093.479   | 2 | 19 | 19.046  | 17.23 |
| 29 | 42.79 | 44.97 | 59.5 PBK_FlexIII   | 99.0 AFTEANDGSLCLAMEYGGEEK                 | Deamidated(N) @ 6; Propionamide(C) @ 11; Label: 13C(6)15N(2)(K) @ 20                                                           | 0.0255852   | 2184.96924 | 1093.492             | 2184.9436  | 1093.479   | 2 | 17 | 18.2516 | 17.23 |
| 29 | 42.79 | 44.97 | 59.5 PBK_FlexIII   | 99.0 AFTEANDGSLCLAMEYGGEEK                 | Propionamide(C) @ 11; Label: 13C(6)15N(2)(K) @ 20                                                                              | -0.0104213  | 2183.94946 | 1092.982             | 2183.95947 | 1092.98706 | 2 | 18 | 19.8273 | 17.23 |
| 29 | 42.79 | 44.97 | 59.5 PBK_FlexIII   | 99.0 AFTEANDGSLCLAMEYGGEEK                 | Propionamide(C) @ 11; Label: 13C(6)15N(2)(K) @ 20                                                                              | -0.0104213  | 2183.94946 | 1092.982             | 2183.95947 | 1092.98706 | 2 | 17 | 20.1533 | 17.23 |
| 29 | 42.79 | 44.97 | 59.5 PBK_FlexIII   | 99.0 AFTEANDGSLCLAMEYGGEEK                 | Deamidated(N) @ 6; Propionamide(C) @ 11; Label: 13C(6)15N(2)(K) @ 20                                                           | 0.0255852   | 2184.96924 | 1093.492             | 2184.9436  | 1093.479   | 2 | 17 | 20.8501 | 17.23 |
| 29 | 42.79 | 44.97 | 59.5 PBK_FlexIII   | 99.0 AFTEANDGSLCLAMEYGGEEK                 | Propionamide(C) @ 11; Label: 13C(6)15N(2)(K) @ 20                                                                              | 0.00959829  | 2183.96924 | 1092.992             | 2183.95947 | 1092.98706 | 2 | 15 | 21.2089 | 17.23 |
| 29 | 42.79 | 44.97 | 59.5 PBK_FlexIII   | 99.0 AFTEANDGSLCLAMEYGGEEK                 | Deamidated(N) @ 6; Propionamide(C) @ 11; Label: 13C(6)15N(2)(K) @ 20                                                           | 0.0255852   | 2184.96924 | 1093.492             | 2184.9436  | 1093.479   | 2 | 14 | 26.5123 | 17.23 |
| 29 | 42.79 | 44.97 | 59.5 PBK_FlexIII   | 99.0 AFTEANDGSLCLAMEYGGEEK                 | Deamidated(N) @ 6; Propionamide(C) @ 11; Label: 13C(6)15N(2)(K) @ 20                                                           | 0.0255852   | 2184.96924 | 1093.492             | 2184.9436  | 1093.479   | 2 | 13 | 21.4784 | 17.23 |
| 29 | 42.79 | 44.97 | 59.5 PBK_FlexIII   | 99.0 AFTEANDGSLCLAMEYGGEEK                 | Deamidated(N) @ 6; Propionamide(C) @ 11; Label: 13C(6)15N(2)(K) @ 20                                                           | 0.0275192   | 2184.9707  | 729.3309             | 2184.9436  | 729.321777 | 3 | 12 | 26.5256 | 17.23 |
| 29 | 42.79 | 44.97 | 59.5 PBK_FlexIII   | 99.0 GLSHSPWAVK                            | Label: 13C(6)15N(2)(K) @ 10                                                                                                    | 0.00054643  | 1088.58643 | 545.3005             | 1088.58582 | 545.300171 | 2 | 12 | 16.1009 | 17.23 |
| 29 | 42.79 | 44.97 | 59.5 PBK_FlexIII   | 99.0 GLSHSPWAVK                            | Label: 13C(6)15N(2)(K) @ 10; Label: 13C(6)15N(2)(K) @ 11                                                                       | -0.0017141  | 1224.69324 | 613.3539             | 1224.69495 | 613.354797 | 2 | 12 | 15.0987 | 17.23 |
| 29 | 42.79 | 44.97 | 59.5 PBK_FlexIII   | 99.0 ICDVGVSLPLDENMTVTDPEACYIGTEPWPKPK     | Propionamide(C) @ 2; Propionamide(C) @ 22; Label: 13C(6)15N(2)(K) @ 30; Label: 13C(6)15N(2)(K) @ 32                            | -0.00038001 | 3677.76221 | 1226.928             | 3677.76392 | 1226.92859 | 3 | 18 | 19.5197 | 17.23 |
| 29 | 42.79 | 44.97 | 59.5 PBK_FlexIII   | 99.0 ICDVGVSLPLDENMTVTDPEACYIGTEPWPKPK     | Propionamide(C) @ 2; Oxidation(M) @ 14; Propionamide(C) @ 22; Label: 13C(6)15N(2)(K) @ 30; Label: 13C(6)15N(2)(K) @ 32         | 0.00596535  | 3693.76416 | 1232.262             | 3693.75879 | 1232.26013 | 3 | 16 | 18.9867 | 17.23 |
| 29 | 42.79 | 44.97 | 59.5 PBK_FlexIII   | 99.0 KINPICNDHYR                           | Label: 13C(6)15N(2)(K) @ 1; Propionamide(C) @ 6; Label: 13C(6)15N(4)(R) @ 11                                                   | -0.00061499 | 1460.73071 | 731.3726             | 1460.73132 | 731.372925 | 2 | 13 | 14.6544 | 17.23 |
| 29 | 42.79 | 44.97 | 59.5 PBK_FlexIII   | 99.0 KINPICNDHYR                           | Label: 13C(6)15N(2)(K) @ 1; Propionamide(C) @ 6; Label: 13C(6)15N(4)(R) @ 11                                                   | -0.00081714 | 1460.73035 | 487.9174             | 1460.73132 | 487.917725 | 3 | 12 | 14.3918 | 17.23 |
| 29 | 42.79 | 44.97 | 59.5 PBK_FlexIII   | 99.0 KKSVCSTPTINIPASPFMQK                  | Label: 13C(6)15N(2)(K) @ 1; Label: 13C(6)15N(2)(K) @ 2; Propionamide(C) @ 6; Deamidated(N) @ 12; Label: 13C(6)15N(2)(K) @ 21   | 0.0251791   | 2385.31152 | 796.1111             | 2385.28613 | 796.102661 | 3 | 12 | 18.1822 | 17.23 |
| 29 | 42.79 | 44.97 | 59.5 PBK_FlexIII   | 99.0 LGFGTGVNVYLMK                         | Oxidation(M) @ 12; Label: 13C(6)15N(2)(K) @ 13                                                                                 | 0.00040466  | 1421.74731 | 711.8809             | 1421.74683 | 711.880676 | 2 | 16 | 18.5195 | 17.23 |
| 29 | 42.79 | 44.97 | 59.5 PBK_FlexIII   | 99.0 LGFGTGVNVYLMK                         | Label: 13C(6)15N(2)(K) @ 13                                                                                                    | -0.00667312 | 1405.74524 | 703.8799             | 1405.75195 | 703.88324  | 2 | 16 | 19.1092 | 17.23 |
| 29 | 42.79 | 44.97 | 59.5 PBK_FlexIII   | 99.0 LGFGTGVNVYLMK                         | Label: 13C(6)15N(2)(K) @ 13                                                                                                    | 0.00164682  | 1397.7395  | 699.877              | 1397.73767 | 699.87616  | 2 | 16 | 19.2001 | 17.23 |
| 29 | 42.79 | 44.97 | 59.5 PBK_FlexIII   | 99.0 LGFGTGVNVYLMK                         | Label: 13C(6)15N(2)(K) @ 13                                                                                                    | -0.00191236 | 1405.75012 | 703.8823             | 1405.75195 | 703.88324  | 2 | 16 | 19.6217 | 17.23 |
| 29 | 42.79 | 44.97 | 59.5 PBK_FlexIII   | 99.0 LGFGTGVNVYLMK                         | Label: 13C(6)15N(2)(K) @ 13                                                                                                    | -0.00471999 | 1405.74731 | 703.8809             | 1405.75195 | 703.88324  | 2 | 13 | 20.7286 | 17.23 |
| 29 | 42.79 | 44.97 | 59.5 PBK_FlexIII   | 99.0 LGFGTGVNVYLMK                         | Label: 13C(6)15N(2)(K) @ 13                                                                                                    | -0.00471999 | 1405.74731 | 703.8809             | 1405.75195 | 703.88324  | 2 | 9  | 26.8353 | 17.23 |
| 29 | 42.79 | 44.97 | 59.5 PBK_FlexIII   | 99.0 LGFGTGVNVYLMK                         | Label: 13C(6)15N(2)(K) @ 13                                                                                                    | -0.00154615 | 1405.75024 | 703.8824             | 1405.75195 | 703.88324  | 2 | 12 | 19.3457 | 17.23 |
| 29 | 42.79 | 44.97 | 59.5 PBK_FlexIII   | 99.0 LGFGTGVNVYLMKR                        | Label: 13C(6)15N(2)(K) @ 13; Label: 13C(6)15N(4)(R) @ 14                                                                       | -0.00177277 | 1571.85938 | 524.9604             | 1571.86133 | 524.96106  | 3 | 12 | 18.3592 | 17.23 |
| 29 | 42.79 | 44.97 | 59.5 PBK_FlexIII   | 99.0 SLHHPNIVGYR                           | Label: 13C(6)15N(4)(R) @ 11                                                                                                    | 5.04E-05    | 1301.68689 | 651.8507             | 1301.68677 | 651.850708 | 2 | 12 | 14.9691 | 17.23 |
| 29 | 42.79 | 44.97 | 59.5 PBK_FlexIII   | 99.0 SLHHPNIVGYR                           | Label: 13C(6)15N(4)(R) @ 11                                                                                                    | -0.00255114 | 1301.6842  | 326.4283             | 1301.68677 | 326.428986 | 4 | 11 | 14.9979 | 17.23 |
| 29 | 42.79 | 44.97 | 59.5 PBK_FlexIII   | 99.0 SLHHPNIVGYR                           | Label: 13C(6)15N(4)(R) @ 11                                                                                                    | -0.00054844 | 1301.68628 | 434.9027             | 1301.68677 | 434.902893 | 3 | 11 | 15.4643 | 17.23 |
| 29 | 42.79 | 44.97 | 59.5 PBK_FlexIII   | 99.0 SLHHPNIVGYR                           | Label: 13C(6)15N(4)(R) @ 11                                                                                                    | -0.00805579 | 1301.67883 | 434.9002             | 1301.68677 | 434.902893 | 3 | 9  | 24.059  | 17.23 |
| 29 | 42.79 | 44.97 | 59.5 PBK_FlexIII   | 99.0 SLHHPNIVGYR                           | Label: 13C(6)15N(4)(R) @ 11                                                                                                    | 0.00183193  | 1301.68872 | 434.9035             | 1301.68677 | 434.902893 | 3 | 10 | 26.6551 | 17.23 |
| 29 | 42.79 | 44.97 | 59.5 PBK_FlexIII   | 99.0 SLHHPNIVGYR                           | Label: 13C(6)15N(4)(R) @ 11                                                                                                    | -0.00291735 | 1301.6842  | 326.4283             | 1301.68677 | 326.428986 | 4 | 10 | 15.2585 | 17.23 |
| 29 | 42.79 | 44.97 | 59.5 PBK_FlexIII   | 99.0 SLNDLIEER                             | Label: 13C(6)15N(4)(R) @ 9                                                                                                     | -0.0127426  | 1097.54651 | 549.7805             | 1097.5592  | 549.786865 | 2 | 12 | 17.4101 | 17.23 |
| 29 | 4     |       |                    |                                            |                                                                                                                                |             |            |                      |            |            |   |    |         |       |

|    |       |       |                      |                                   |                                                                                                                                                |                                 |             |            |          |            |            |   |    |         |       |
|----|-------|-------|----------------------|-----------------------------------|------------------------------------------------------------------------------------------------------------------------------------------------|---------------------------------|-------------|------------|----------|------------|------------|---|----|---------|-------|
| 29 | 42.79 | 44.97 | 59.5 PBK_FlexIII     | 99.0 YPTFLYK                      | Label: 13C(6)15N(2)(K) @ 7                                                                                                                     | cleaved V-Y@N-term              | -0.00091407 | 938.498474 | 470.2565 | 938.499329 | 470.256928 | 2 | 9  | 17.7612 | 17.23 |
| 30 | 42.3  | 44.42 | 46.2 ZCCHC12_FlexIII | 99.0 AQPFPSTSGSGSYK               | Label: 13C(6)15N(2)(K) @ 13                                                                                                                    |                                 | -0.00075061 | 1293.6073  | 647.8109 | 1293.60803 | 647.81134  | 2 | 14 | 15.1786 | 11.45 |
| 30 | 42.3  | 44.42 | 46.2 ZCCHC12_FlexIII | 99.0 AQPFPSTSGSGSYKNGPGEMR        | Label: 13C(6)15N(2)(K) @ 13; Deamidated(N) @ 15; Label: 13C(6)15N(4)(R) @ 21                                                                   | missed K-N @ 13                 | -0.00449156 | 2159.96167 | 720.9945 | 2159.96060 | 720.995972 | 3 | 17 | 15.6712 | 11.45 |
| 30 | 42.3  | 44.42 | 46.2 ZCCHC12_FlexIII | 99.0 ARPODELVIDSPHNSR             | Label: 13C(6)15N(4)(R) @ 2; Label: 13C(6)15N(4)(R) @ 17                                                                                        |                                 | -0.00690559 | 1951.99121 | 651.671  | 1951.99793 | 651.673218 | 3 | 16 | 15.9814 | 11.45 |
| 30 | 42.3  | 44.42 | 46.2 ZCCHC12_FlexIII | 99.0 CSYCGEEGHSK                  | Propionamide(C) @ 1; Propionamide(C) @ 4; Label: 13C(6)15N(2)(K) @ 11                                                                          |                                 | -0.00195473 | 1348.52869 | 675.2716 | 1348.52673 | 675.27063  | 2 | 13 | 9.424   | 11.45 |
| 30 | 42.3  | 44.42 | 46.2 ZCCHC12_FlexIII | 99.0 CSYCGEEGHSKETCDNESDK         | Propionamide(C) @ 1; Propionamide(C) @ 4; Label: 13C(6)15N(2)(K) @ 11; Propionamide(C) @ 14; Label: 13C(6)15N(2)(K) @ 20                       | missed K-E @ 11                 | -0.00951388 | 2448.93408 | 613.2408 | 2448.94385 | 613.243225 | 4 | 11 | 12.7054 | 11.45 |
| 30 | 42.3  | 44.42 | 46.2 ZCCHC12_FlexIII | 99.0 EEEEDWDAFIKR                 | Label: 13C(6)15N(2)(K) @ 11; Label: 13C(6)15N(4)(R) @ 12                                                                                       | missed K-R @ 11                 | 0.00116525  | 1569.70764 | 785.8611 | 1569.70667 | 785.860596 | 2 | 12 | 17.7057 | 11.45 |
| 30 | 42.3  | 44.42 | 46.2 ZCCHC12_FlexIII | 99.0 FFNTLOAQGEK                  | Label: 13C(6)15N(2)(K) @ 11                                                                                                                    |                                 | -0.00182311 | 1289.64771 | 645.8311 | 1289.64954 | 645.832031 | 2 | 12 | 16.8263 | 11.45 |
| 30 | 42.3  | 44.42 | 46.2 ZCCHC12_FlexIII | 99.0 LEVLQNAIQAGIAEKDANR          | Deamidated(N) @ 7; Label: 13C(6)15N(2)(K) @ 17; Label: 13C(6)15N(4)(R) @ 21                                                                    | missed K-D @ 17                 | 0.0161853   | 2312.26196 | 771.7612 | 2312.24561 | 771.755798 | 3 | 18 | 19.0951 | 11.45 |
| 30 | 42.3  | 44.42 | 46.2 ZCCHC12_FlexIII | 99.0 LPNFLEIUR                    | Label: 13C(6)15N(4)(R) @ 9                                                                                                                     |                                 | 0.00175101  | 1123.66467 | 562.8396 | 1123.66284 | 562.838745 | 2 | 12 | 20.4287 | 11.45 |
| 30 | 42.3  | 44.42 | 46.2 ZCCHC12_FlexIII | 99.0 LQQLLLGGELSR                 | Label: 13C(6)15N(4)(R) @ 12                                                                                                                    |                                 | 3.60E-05    | 1335.77502 | 668.8948 | 1335.77502 | 668.894775 | 2 | 14 | 18.5718 | 11.45 |
| 30 | 42.3  | 44.42 | 46.2 ZCCHC12_FlexIII | 99.0 LVFGSESSVTAHGK               | Label: 13C(6)15N(2)(K) @ 15                                                                                                                    |                                 | 0.0134519   | 1554.79065 | 519.2708 | 1554.77698 | 519.266235 | 3 | 12 | 16.1483 | 11.45 |
| 30 | 42.3  | 44.42 | 46.2 ZCCHC12_FlexIII | 99.0 MVRREEDWDDAFIK               | Label: 13C(6)15N(4)(R) @ 3; Label: 13C(6)15N(2)(K) @ 14                                                                                        | missed R-E @ 3                  | -0.0147555  | 1799.8009  | 600.9409 | 1799.81555 | 600.945801 | 3 | 16 | 17.9623 | 11.45 |
| 30 | 42.3  | 44.42 | 46.2 ZCCHC12_FlexIII | 99.0 MVRREEDWDDAFIKR              | Label: 13C(6)15N(4)(R) @ 3; Label: 13C(6)15N(2)(K) @ 14; Label: 13C(6)15N(4)(R) @ 15                                                           | missed R-E @ 3; missed K-R @ 14 | -0.0138608  | 1965.91113 | 656.311  | 1965.92493 | 656.315552 | 3 | 18 | 17.3071 | 11.45 |
| 30 | 42.3  | 44.42 | 46.2 ZCCHC12_FlexIII | 99.0 MYANEQER                     | Label: 13C(6)15N(4)(R) @ 8                                                                                                                     |                                 | 0.00211418  | 1049.44971 | 525.7321 | 1049.44751 | 525.731079 | 2 | 9  | 12.3355 | 11.45 |
| 30 | 42.3  | 44.42 | 46.2 ZCCHC12_FlexIII | 99.0 MYANEQERLPNFLEIUR            | Label: 13C(6)15N(4)(R) @ 8; Label: 13C(6)15N(4)(R) @ 17                                                                                        | missed R-L @ 8                  | 0.0214918   | 2155.12197 | 719.381  | 2155.09985 | 719.373901 | 3 | 11 | 20.1678 | 11.45 |
| 30 | 42.3  | 44.42 | 46.2 ZCCHC12_FlexIII | 99.0 RLNAPLPWAHSMRLR              | Label: 13C(6)15N(4)(R) @ 1; Label: 13C(6)15N(4)(R) @ 15                                                                                        | missed R-L @ 1                  | 0.00555698  | 1777.97339 | 445.5006 | 1777.96765 | 445.499207 | 4 | 12 | 18.2372 | 11.45 |
| 30 | 42.3  | 44.42 | 46.2 ZCCHC12_FlexIII | 99.0 SLGPIMASMADR                 | Label: 13C(6)15N(4)(R) @ 12                                                                                                                    |                                 | -0.00123094 | 1257.6073  | 629.8109 | 1257.60852 | 629.811523 | 2 | 13 | 18.3145 | 11.45 |
| 30 | 42.3  | 44.42 | 46.2 ZCCHC12_FlexIII | 99.0 VAPGEYNDSEPLYPTFLYK          | Label: 13C(6)15N(2)(K) @ 20                                                                                                                    |                                 | -0.00563691 | 2357.1294  | 1179.572 | 2357.13477 | 1179.57459 | 2 | 15 | 19.7628 | 11.45 |
| 30 | 42.3  | 44.42 | 46.2 ZCCHC12_FlexIII | 99.0 VLQATNPMLSADFLR              | Label: 13C(6)15N(4)(R) @ 16                                                                                                                    |                                 | 0.00047895  | 1766.95593 | 884.4852 | 1766.95544 | 884.484985 | 2 | 19 | 19.5452 | 11.45 |
| 30 | 42.3  | 44.42 | 46.2 ZCCHC12_FlexIII | 99.0 SRVAPGEYNDSEPLYPTFLYK        | Label: 13C(6)15N(4)(R) @ 2; Deamidated(N) @ 9; Label: 13C(6)15N(2)(K) @ 22                                                                     | missed R-V @ 2                  | 0.0120077   | 2611.27197 | 871.4313 | 2611.26025 | 871.427307 | 3 | 12 | 19.2204 | 11.45 |
| 30 | 42.3  | 44.42 | 46.2 ZCCHC12_FlexIII | 99.0 AQPFPSTSGSGSYKNGPGEMR        | Label: 13C(6)15N(2)(K) @ 13; Deamidated(N) @ 15; Label: 13C(6)15N(4)(R) @ 21                                                                   | missed K-N @ 13                 | 0.0152839   | 2159.98145 | 721.0011 | 2159.96060 | 720.995972 | 3 | 15 | 15.4103 | 11.45 |
| 30 | 42.3  | 44.42 | 46.2 ZCCHC12_FlexIII | 99.0 ARPODELVIDSPHNSR             | Label: 13C(6)15N(4)(R) @ 2; Deamidated(N) @ 15; Label: 13C(6)15N(4)(R) @ 17                                                                    |                                 | -0.00086817 | 1952.98108 | 652.001  | 1952.98193 | 652.001221 | 3 | 21 | 16.2614 | 11.45 |
| 30 | 42.3  | 44.42 | 46.2 ZCCHC12_FlexIII | 99.0 ARPODELVIDSPHNSR             | Label: 13C(6)15N(4)(R) @ 2; Deamidated(N) @ 15; Label: 13C(6)15N(4)(R) @ 17                                                                    |                                 | 0.0266108   | 1953.00842 | 977.5115 | 1952.98193 | 977.49823  | 2 | 13 | 16.1049 | 11.45 |
| 30 | 42.3  | 44.42 | 46.2 ZCCHC12_FlexIII | 99.0 CSYCGEEGHSK                  | Propionamide(C) @ 1; Propionamide(C) @ 4; Label: 13C(6)15N(2)(K) @ 11                                                                          |                                 | 0.00185004  | 1348.52856 | 450.5168 | 1348.52673 | 450.516174 | 3 | 11 | 9.363   | 11.45 |
| 30 | 42.3  | 44.42 | 46.2 ZCCHC12_FlexIII | 99.0 CSYCGEEGHSK                  | Propionamide(C) @ 1; Propionamide(C) @ 4; Label: 13C(6)15N(2)(K) @ 11                                                                          |                                 | 0.0021247   | 1348.52893 | 450.5169 | 1348.52673 | 450.516174 | 3 | 11 | 9.6331  | 11.45 |
| 30 | 42.3  | 44.42 | 46.2 ZCCHC12_FlexIII | 99.0 FFNTLOAQGEK                  | Deamidated(Q) @ 8; Label: 13C(6)15N(2)(K) @ 11                                                                                                 |                                 | 0.0137968   | 1290.64722 | 646.3309 | 1290.63355 | 646.324036 | 2 | 12 | 17.1052 | 11.45 |
| 30 | 42.3  | 44.42 | 46.2 ZCCHC12_FlexIII | 99.0 MVRREEDWDDAFIK               | Label: 13C(6)15N(4)(R) @ 3; Label: 13C(6)15N(2)(K) @ 14                                                                                        | missed R-E @ 3                  | -0.00735707 | 1799.80823 | 900.9114 | 1799.81555 | 900.915039 | 2 | 21 | 18.0138 | 11.45 |
| 30 | 42.3  | 44.42 | 46.2 ZCCHC12_FlexIII | 99.0 MVRREEDWDDAFIKR              | Label: 13C(6)15N(4)(R) @ 3; Label: 13C(6)15N(2)(K) @ 14; Label: 13C(6)15N(4)(R) @ 15                                                           | missed R-E @ 3; missed K-R @ 14 | 0.00864803  | 1965.93372 | 492.4907 | 1965.92493 | 492.488495 | 4 | 14 | 17.2885 | 11.45 |
| 30 | 42.3  | 44.42 | 46.2 ZCCHC12_FlexIII | 99.0 MVRREEDWDDAFIKR              | Label: 13C(6)15N(4)(R) @ 3; Label: 13C(6)15N(2)(K) @ 14; Label: 13C(6)15N(4)(R) @ 15                                                           | missed R-E @ 3; missed K-R @ 14 | 0.00354736  | 1965.92847 | 983.9715 | 1965.92493 | 983.969727 | 2 | 23 | 17.3736 | 11.45 |
| 30 | 42.3  | 44.42 | 46.2 ZCCHC12_FlexIII | 99.0 MVRREEDWDDAFIKR              | Label: 13C(6)15N(4)(R) @ 3; Label: 13C(6)15N(2)(K) @ 14; Label: 13C(6)15N(4)(R) @ 15                                                           | missed R-E @ 3; missed K-R @ 14 | 0.00864803  | 1965.93372 | 492.4907 | 1965.92493 | 492.488495 | 4 | 14 | 17.5539 | 11.45 |
| 30 | 42.3  | 44.42 | 46.2 ZCCHC12_FlexIII | 99.0 MVRREEDWDDAFIKR              | Label: 13C(6)15N(4)(R) @ 3; Label: 13C(6)15N(2)(K) @ 14; Label: 13C(6)15N(4)(R) @ 15                                                           | missed R-E @ 3; missed K-R @ 14 | -0.00397312 | 1965.92102 | 656.3143 | 1965.92493 | 656.315552 | 3 | 15 | 17.6698 | 11.45 |
| 30 | 42.3  | 44.42 | 46.2 ZCCHC12_FlexIII | 99.0 VAPGEYNDSEPLYPTFLYK          | Label: 13C(6)15N(2)(K) @ 20                                                                                                                    |                                 | 0.00852327  | 2357.14331 | 1179.579 | 2357.13477 | 1179.57459 | 2 | 15 | 20.0327 | 11.45 |
| 30 | 42.3  | 44.42 | 46.2 ZCCHC12_FlexIII | 99.0 YPTFLYK                      | Label: 13C(6)15N(2)(K) @ 7                                                                                                                     | cleaved L-Y@N-term              | -0.00165037 | 938.497681 | 470.2561 | 938.499329 | 470.256928 | 2 | 9  | 18.0092 | 11.45 |
| 30 | 42.3  | 44.42 | 46.2 ZCCHC12_FlexIII | 99.0 YPTFLYK                      | Label: 13C(6)15N(2)(K) @ 7                                                                                                                     | cleaved L-Y@N-term              | 0.00020099  | 938.499451 | 470.257  | 938.499329 | 470.256928 | 2 | 9  | 17.9008 | 11.45 |
| 30 | 42.3  | 44.42 | 46.2 ZCCHC12_FlexIII | 99.0 YPTFLYK                      | Label: 13C(6)15N(2)(K) @ 7                                                                                                                     | cleaved L-Y@N-term              | -0.00091407 | 938.498474 | 470.2565 | 938.499329 | 470.256928 | 2 | 9  | 17.7612 | 11.45 |
| 31 | 41.62 | 43.81 | 59.6 LIMS1_FlexIII   | 99.6 AMNNSWHPECFR                 | Propionamide(C) @ 10; Label: 13C(6)15N(4)(R) @ 12                                                                                              |                                 | -0.00073123 | 1571.66284 | 786.8387 | 1571.6637  | 786.839111 | 2 | 15 | 16.7729 | 4.68  |
| 31 | 41.62 | 43.81 | 59.6 LIMS1_FlexIII   | 99.0 AWCVNCFACSTCNTK              | Propionamide(C) @ 3; Deamidated(N) @ 5; Propionamide(C) @ 6; Propionamide(C) @ 9; Propionamide(C) @ 12; Label: 13C(6)15N(2)(K) @ 15            |                                 | 0.015815    | 1942.80823 | 972.4114 | 1942.7926  | 972.403565 | 2 | 13 | 17.8226 | 4.68  |
| 31 | 41.62 | 43.81 | 59.6 LIMS1_FlexIII   | 99.0 CDLCQEVLDADGVK               | Propionamide(C) @ 4; Label: 13C(6)15N(2)(K) @ 15                                                                                               |                                 | -0.00317765 | 1801.88025 | 901.9474 | 1801.88342 | 901.948975 | 2 | 18 | 20.6654 | 4.68  |
| 31 | 41.62 | 43.81 | 59.6 LIMS1_FlexIII   | 99.0 CHAIDEQPLIFK                 | Propionamide(C) @ 1; Label: 13C(6)15N(2)(K) @ 13                                                                                               |                                 | -0.00018588 | 1604.84753 | 803.431  | 1604.84766 | 803.431091 | 2 | 20 | 18.1065 | 4.68  |
| 31 | 41.62 | 43.81 | 59.6 LIMS1_FlexIII   | 99.0 CHAIDEQPLIFKNDPYHPDFHCANCNGK | Propionamide(C) @ 1; Label: 13C(6)15N(2)(K) @ 13; Deamidated(N) @ 14; Propionamide(C) @ 24; Propionamide(C) @ 27; Label: 13C(6)15N(2)(K) @ 13  | missed K-N @ 13                 | -0.0125367  | 3568.61719 | 714.7307 | 3568.62964 | 714.733215 | 5 | 15 | 17.3004 | 4.68  |
| 31 | 41.62 | 43.81 | 59.6 LIMS1_FlexIII   | 99.0 CKGGFAPAEK                   | Propionamide(C) @ 1; Label: 13C(6)15N(2)(K) @ 2; Label: 13C(6)15N(2)(K) @ 10                                                                   | missed K-G @ 2                  | -0.0101192  | 1093.54602 | 547.7803 | 1093.55615 | 547.785339 | 2 | 13 | 13.709  | 4.68  |
| 31 | 41.62 | 43.81 | 59.6 LIMS1_FlexIII   | 99.0 ELKGELYCLPCHDK               | Label: 13C(6)15N(2)(K) @ 3; Propionamide(C) @ 8; Propionamide(C) @ 11; Label: 13C(6)15N(2)(K) @ 14                                             | missed K-G @ 3                  | 0.00075547  | 1804.88306 | 903.4488 | 1804.88232 | 903.448425 | 2 | 18 | 16.3576 | 4.68  |
| 31 | 41.62 | 43.81 | 59.6 LIMS1_FlexIII   | 99.0 FVEFDMKPVCK                  | Label: 13C(6)15N(2)(K) @ 7; Propionamide(C) @ 10; Label: 13C(6)15N(2)(K) @ 11                                                                  |                                 | 0.00029923  | 1428.71362 | 715.3641 | 1428.71167 | 715.363098 | 2 | 12 | 17.4142 | 4.68  |
| 31 | 41.62 | 43.81 | 59.6 LIMS1_FlexIII   | 99.0 FVEFDMKPVCKK                 | Label: 13C(6)15N(2)(K) @ 7; Propionamide(C) @ 10; Label: 13C(6)15N(2)(K) @ 11; Label: 13C(6)15N(2)(K) @ 12                                     | missed K-K @ 11                 | -0.0031787  | 1564.81787 | 522.6132 | 1564.8208  | 522.614197 | 3 | 11 | 16.6375 | 4.68  |
| 31 | 41.62 | 43.81 | 59.6 LIMS1_FlexIII   | 99.0 KGLAYCETHYNQLFGDVCFHCNR      | Label: 13C(6)15N(2)(K) @ 1; Propionamide(C) @ 6; Deamidated(N) @ 11; Propionamide(C) @ 18; Propionamide(C) @ 21; Label: 13C(6)15N(2)(K) @ 13   | missed K-G @ 1                  | 0.0226455   | 2949.33423 | 738.3408 | 2949.31152 | 738.335144 | 4 | 14 | 17.7898 | 4.68  |
| 31 | 41.62 | 43.81 | 59.6 LIMS1_FlexIII   | 99.0 KYCEHDFQMLFAPCCHQCCEFTIGR    | Label: 13C(6)15N(2)(K) @ 1; Propionamide(C) @ 3; Propionamide(C) @ 14; Propionamide(C) @ 15; Propionamide(C) @ 18; Label: 13C(6)15N(2)(K) @ 13 |                                 | -0.00017408 | 3264.41919 | 653.8911 | 3264.41919 | 653.891113 | 5 | 15 | 18.3837 | 4.68  |
| 31 | 41.62 | 43.81 | 59.6 LIMS1_FlexIII   | 99.0 MGVPICGACR                   | Propionamide(C) @ 9; Label: 13C(6)15N(4)(R) @ 10                                                                                               |                                 | -0.00103961 | 1157.53723 | 579.7759 | 1157.53833 | 579.776428 | 2 | 13 | 16.7221 | 4.68  |
| 31 | 41.62 | 43.81 | 59.6 LIMS1_FlexIII   | 99.0 NDPYHPDFHCANCNGK             | Propionamide(C) @ 11; Propionamide(C) @ 14; Label: 13C(6)15N(2)(K) @ 16                                                                        |                                 | 0.00188198  | 1980.81043 | 591.4125 | 1980.80872 | 591.411621 | 2 | 23 | 14.6803 | 4.68  |
| 31 | 41.62 | 43.81 | 59.6 LIMS1_FlexIII   | 99.0 NKFVEFDMKPVCK                | Label: 13C(6)15N(2)(K) @ 2; Label: 13C(6)15N(2)(K) @ 9; Propionamide(C) @ 12; Label: 13C(6)15N(2)(K) @ 13                                      | missed K-F @ 2                  | 0.00531302  | 1678.86914 | 560.6303 | 1678.86377 | 560.62854  | 3 | 14 | 16.8213 | 4.68  |
| 31 | 41.62 | 43.81 | 59.6 LIMS1_FlexIII   | 99.0 NKFVEFDMKPVCKK               | Label: 13C(6)15N(2)(K) @ 2; Label: 13C(6)15N(2)(K) @ 9; Propionamide(C) @ 12; Label: 13C(6)15N(2)(K) @ 13; Label: 13C(6)15N(2)(K) @ 13         | missed K-F @ 2; missed K-K @ 13 | 0.00653348  | 1814.97949 | 606.0004 | 1814.97929 | 605.99823  | 3 | 14 | 16.217  | 4.68  |
| 31 | 41.62 | 43.81 | 59.6 LIMS1_FlexIII   | 99.0 QWHVFHFVCAK                  | Gln->pyro-Glu@N-term; Propionamide(C) @ 9; Label: 13C(6)15N(2)(K) @ 11                                                                         |                                 | -0.00201716 | 1444.6781  | 723.3463 | 1444.68018 | 723.347351 | 2 | 17 | 17.3187 | 4.68  |
| 31 | 41.62 | 43.81 | 59.6 LIMS1_FlexIII   | 99.0 VIEGGSVVALNK                 | Label: 13C(6)15N(2)(K) @ 12                                                                                                                    |                                 | -0.00048282 | 1192.69031 | 597.3524 | 1192.69067 | 597.3526   | 2 | 14 | 16.9554 | 4.68  |
| 31 | 41.62 | 43.81 | 59.6 LIMS1_FlexIII   | 99.0 YCEHDFQMLFAPCCHQCCEFTIGR     | Label: 13C(6)15N(2)(K) @ 2; Propionamide(C) @ 13; Propionamide(C) @ 14; Deamidated(Q) @ 16; Propionamide(C) @ 17; Label: 13C(6)15N(4)(R) @ 24  |                                 | 0.0192749   | 3129.31445 | 1044.112 | 3129.293   |            |   |    |         |       |

|    |       |       |      |               |      |                                             |                                                                                                                                                                                                  |                                 |             |            |          |            |            |   |    |         |       |
|----|-------|-------|------|---------------|------|---------------------------------------------|--------------------------------------------------------------------------------------------------------------------------------------------------------------------------------------------------|---------------------------------|-------------|------------|----------|------------|------------|---|----|---------|-------|
| 31 | 41.62 | 43.81 | 59.6 | LIMS1_FlexIII | 99.0 | ELKGELYCLPCHDK                              | Label: 13C(6)15N(2)(K) @ 3; Propionamide(C) @ 8; Propionamide(C) @ 11; Label: 13C(6)15N(2)(K) @ 14                                                                                               | missed K-G @ 3                  | -0.0128771  | 1804.86926 | 602.6304 | 1804.88232 | 602.634705 | 3 | 11 | 16.3164 | 4.68  |
| 31 | 41.62 | 43.81 | 59.6 | LIMS1_FlexIII | 99.0 | FVEFDMKPVCK                                 | Label: 13C(6)15N(2)(K) @ 7; Propionamide(C) @ 10; Label: 13C(6)15N(2)(K) @ 11                                                                                                                    |                                 | -0.00073704 | 1428.71082 | 477.2442 | 1428.71167 | 477.244476 | 3 | 11 | 17.4113 | 4.68  |
| 31 | 41.62 | 43.81 | 59.6 | LIMS1_FlexIII | 99.0 | KYCEHDFQMLFAPCCHQCCEFTIGR                   | Label: 13C(6)15N(2)(K) @ 1; Propionamide(C) @ 3; Deamidated(Q) @ 8; Propionamide(C) @ 14; Propionamide(C) @ 15; Propionamide(C) @ 16                                                             |                                 | 0.0118677   | 3265.41504 | 817.361  | 3265.40308 | 817.358032 | 4 | 16 | 18.374  | 4.68  |
| 31 | 41.62 | 43.81 | 59.6 | LIMS1_FlexIII | 99.0 | MGVPICGACR                                  | Propionamide(C) @ 6; Propionamide(C) @ 9; Label: 13C(6)15N(4)(R) @ 10                                                                                                                            |                                 | -0.00018511 | 1157.53833 | 579.7764 | 1157.53833 | 579.776428 | 2 | 13 | 16.4426 | 4.68  |
| 31 | 41.62 | 43.81 | 59.6 | LIMS1_FlexIII | 99.0 | MGVPICGACR                                  | Propionamide(C) @ 6; Propionamide(C) @ 9                                                                                                                                                         |                                 | -2.07E-06   | 1147.53003 | 574.7723 | 1147.53003 | 574.772278 | 2 | 12 | 16.5271 | 4.68  |
| 31 | 41.62 | 43.81 | 59.6 | LIMS1_FlexIII | 99.0 | NDPYHPDHFNCANCNGK                           | Propionamide(C) @ 11; Propionamide(C) @ 14; Label: 13C(6)15N(2)(K) @ 16                                                                                                                          |                                 | -0.00021493 | 1980.80823 | 661.2767 | 1980.80872 | 661.276856 | 3 | 14 | 14.629  | 4.68  |
| 31 | 41.62 | 43.81 | 59.6 | LIMS1_FlexIII | 99.0 | NDPYHPDHFNCANCNGK                           | Propionamide(C) @ 11; Propionamide(C) @ 14; Label: 13C(6)15N(2)(K) @ 16                                                                                                                          |                                 | -0.00589122 | 1980.80249 | 661.2748 | 1980.80872 | 661.276856 | 3 | 13 | 14.903  | 4.68  |
| 31 | 41.62 | 43.81 | 59.6 | LIMS1_FlexIII | 99.0 | NDPYHPDHFNCANCNGK                           | Propionamide(C) @ 11; Propionamide(C) @ 14; Label: 13C(6)15N(2)(K) @ 16                                                                                                                          |                                 | -0.00133528 | 1980.80737 | 496.2091 | 1980.80872 | 496.209442 | 4 | 12 | 14.6497 | 4.68  |
| 31 | 41.62 | 43.81 | 59.6 | LIMS1_FlexIII | 99.0 | NKFVEFDMKPVCKK                              | Label: 13C(6)15N(2)(K) @ 2; Label: 13C(6)15N(2)(K) @ 9; Propionamide(C) @ 12; Label: 13C(6)15N(2)(K) @ 13; Label: 13C(6)15N(2)(K) @ 14; Label: 13C(6)15N(2)(K) @ 15; Label: 13C(6)15N(2)(K) @ 16 |                                 | -0.00294871 | 1814.97008 | 454.7498 | 1814.9729  | 454.750488 | 4 | 12 | 16.4426 | 4.68  |
| 31 | 41.62 | 43.81 | 59.6 | LIMS1_FlexIII | 99.0 | QWHVHFVCAK                                  | Gln->pyro-Glu @ N-term; Propionamide(C) @ 9; Label: 13C(6)15N(2)(K) @ 11                                                                                                                         |                                 | -0.00112334 | 1444.67908 | 482.567  | 1444.68018 | 482.567322 | 3 | 14 | 17.3644 | 4.68  |
| 31 | 41.62 | 43.81 | 59.6 | LIMS1_FlexIII | 99.0 | VIEGGVVSALNK                                | Label: 13C(6)15N(2)(K) @ 12                                                                                                                                                                      |                                 | -0.00451115 | 1192.68604 | 597.3503 | 1192.69067 | 597.3526   | 2 | 13 | 17.216  | 4.68  |
| 31 | 41.62 | 43.81 | 59.6 | LIMS1_FlexIII | 99.0 | YCEHDFQMLFAPCCHQCCEFTIGR                    | Propionamide(C) @ 2; Propionamide(C) @ 13; Propionamide(C) @ 14; Deamidated(Q) @ 16; Propionamide(C) @ 17; Label: 13C(6)15N(4)(R) @ 24                                                           |                                 | 0.00075948  | 3129.29443 | 783.3309 | 3129.29395 | 783.33075  | 4 | 13 | 18.8196 | 4.68  |
| 31 | 41.62 | 43.81 | 59.6 | LIMS1_FlexIII | 99.0 | YPTFLYK                                     | Label: 13C(6)15N(2)(K) @ 7                                                                                                                                                                       |                                 | -0.00165037 | 938.497681 | 470.2561 | 938.499329 | 470.256928 | 2 | 9  | 18.0092 | 4.68  |
| 31 | 41.62 | 43.81 | 59.6 | LIMS1_FlexIII | 99.0 | YPTFLYK                                     | Label: 13C(6)15N(2)(K) @ 7                                                                                                                                                                       |                                 | 0.00020099  | 938.499451 | 470.257  | 938.499329 | 470.256928 | 2 | 9  | 17.9008 | 4.68  |
| 31 | 41.62 | 43.81 | 59.6 | LIMS1_FlexIII | 99.0 | YPTFLYK                                     | Label: 13C(6)15N(2)(K) @ 7                                                                                                                                                                       |                                 | -0.00091407 | 938.498474 | 470.2565 | 938.499329 | 470.256928 | 2 | 9  | 17.7612 | 4.68  |
| 32 | 41.57 | 43.64 | 69.8 | BMP7_FlexIII  | 99.0 | AAAPHSFVALWAPLFLLR                          | Label: 13C(6)15N(4)(R) @ 18                                                                                                                                                                      |                                 | 5.54E-05    | 1989.128   | 664.0482 | 1989.1228  | 664.048218 | 3 | 18 | 20.6586 | 17.44 |
| 32 | 41.57 | 43.64 | 69.8 | BMP7_FlexIII  | 99.0 | ACGCHYPTFLYK                                | Propionamide(C) @ 2; Propionamide(C) @ 4; Label: 13C(6)15N(2)(K) @ 12                                                                                                                            |                                 | -0.00208244 | 1551.70715 | 518.243  | 1551.70935 | 518.243713 | 3 | 12 | 17.0255 | 17.44 |
| 32 | 41.57 | 43.64 | 69.8 | BMP7_FlexIII  | 99.0 | AVFSTQGPPPLASQDSHFLTDADMVMSFVNLVEHDKFEFFHPR | Deamidated(Q) @ 14; Label: 13C(6)15N(2)(K) @ 36; Label: 13C(6)15N(4)(R) @ 42                                                                                                                     | missed K-E @ 36                 | 0.0308404   | 4778.32129 | 956.6715 | 4778.29053 | 956.665344 | 5 | 12 | 20.5138 | 17.44 |
| 32 | 41.57 | 43.64 | 69.8 | BMP7_FlexIII  | 99.0 | ERFDNETFR                                   | Label: 13C(6)15N(4)(R) @ 2; Label: 13C(6)15N(4)(R) @ 9                                                                                                                                           | missed R-F @ 2                  | -0.00211929 | 1232.56665 | 617.2906 | 1232.56885 | 617.291748 | 2 | 12 | 15.2236 | 17.44 |
| 32 | 41.57 | 43.64 | 69.8 | BMP7_FlexIII  | 99.0 | ESDLFLDSR                                   | Label: 13C(6)15N(4)(R) @ 10                                                                                                                                                                      |                                 | -0.00057835 | 1203.60071 | 602.8076 | 1203.60107 | 602.8078   | 2 | 12 | 18.5716 | 17.44 |
| 32 | 41.57 | 43.64 | 69.8 | BMP7_FlexIII  | 99.0 | FDSLKPEGEAVTAAEFR                           | Label: 13C(6)15N(2)(K) @ 5; Label: 13C(6)15N(4)(R) @ 18                                                                                                                                          | missed K-I @ 5                  | 0.00016926  | 1997.02271 | 666.6815 | 1997.02246 | 666.681458 | 3 | 22 | 18.3907 | 17.44 |
| 32 | 41.57 | 43.64 | 69.8 | BMP7_FlexIII  | 99.0 | HELYVSFR                                    | Label: 13C(6)15N(4)(R) @ 8                                                                                                                                                                       |                                 | -0.00054458 | 1059.53723 | 530.7759 | 1059.53772 | 530.776123 | 2 | 10 | 16.5482 | 17.44 |
| 32 | 41.57 | 43.64 | 69.8 | BMP7_FlexIII  | 99.0 | HGPQNKPQPMVAFFK                             | Label: 13C(6)15N(2)(K) @ 6; Label: 13C(6)15N(2)(K) @ 15                                                                                                                                          | missed K-Q @ 6                  | -0.00008991 | 1790.92505 | 597.9823 | 1790.92615 | 597.982666 | 3 | 14 | 18.347  | 17.44 |
| 32 | 41.57 | 43.64 | 69.8 | BMP7_FlexIII  | 99.0 | HGPQNKPQPMVAFFKATEVHFR                      | Label: 13C(6)15N(2)(K) @ 6; Deamidated(Q) @ 7; Label: 13C(6)15N(2)(K) @ 15; Label: 13C(6)15N(4)(R) @ 22                                                                                          | missed R-Q @ 6; missed K-A @ 15 | 0.0313279   | 2642.37427 | 661.6008 | 2642.34253 | 661.592957 | 4 | 17 | 18.828  | 17.44 |
| 32 | 41.57 | 43.64 | 69.8 | BMP7_FlexIII  | 99.0 | HNLGLQLSVETLDGGSINPK                        | Label: 13C(6)15N(2)(K) @ 20                                                                                                                                                                      |                                 | -0.00175962 | 2170.14575 | 724.3892 | 2170.14746 | 724.38971  | 3 | 24 | 18.3662 | 17.44 |
| 32 | 41.57 | 43.64 | 69.8 | BMP7_FlexIII  | 99.0 | HNSAPMFMLDLYNAMAVEEGGPGGQGSYPYK             | Deamidated(N) @ 13; Label: 13C(6)15N(2)(K) @ 33                                                                                                                                                  |                                 | 0.00998514  | 3543.57666 | 886.9014 | 3543.56641 | 886.989926 | 4 | 28 | 20.2444 | 17.44 |
| 32 | 41.57 | 43.64 | 69.8 | BMP7_FlexIII  | 99.0 | IPEGEAVTAAEFR                               |                                                                                                                                                                                                  |                                 | 0.00610431  | 1388.69971 | 695.3571 | 1388.6936  | 695.354065 | 2 | 15 | 17.1227 | 17.44 |
| 32 | 41.57 | 43.64 | 69.8 | BMP7_FlexIII  | 99.0 | ISVYQVLQELHGR                               | Label: 13C(6)15N(4)(R) @ 13                                                                                                                                                                      |                                 | -0.0149474  | 1550.82935 | 517.9504 | 1550.84448 | 517.955444 | 3 | 10 | 19.2125 | 17.44 |
| 32 | 41.57 | 43.64 | 69.8 | BMP7_FlexIII  | 99.0 | IYKDYIR                                     | Label: 13C(6)15N(2)(K) @ 3; Label: 13C(6)15N(4)(R) @ 7                                                                                                                                           | missed K-D @ 3                  | -0.00043607 | 987.550476 | 494.7825 | 987.550842 | 494.782684 | 2 | 9  | 14.8132 | 17.44 |
| 32 | 41.57 | 43.64 | 69.8 | BMP7_FlexIII  | 99.0 | KHELYVSFR                                   | Label: 13C(6)15N(2)(K) @ 1; Label: 13C(6)15N(4)(R) @ 9                                                                                                                                           | missed K-H @ 1                  | -0.0183385  | 1195.62854 | 399.5501 | 1195.64685 | 399.556244 | 3 | 11 | 15.7569 | 17.44 |
| 32 | 41.57 | 43.64 | 69.8 | BMP7_FlexIII  | 99.0 | LAGLIGR                                     |                                                                                                                                                                                                  |                                 | 0.00156808  | 698.445496 | 350.23   | 698.443909 | 350.229218 | 2 | 8  | 16.22   | 17.44 |
| 32 | 41.57 | 43.64 | 69.8 | BMP7_FlexIII  | 99.0 | MANVAENSSDOR                                | Deamidated(N) @ 7                                                                                                                                                                                |                                 | 0.0183834   | 1408.6073  | 705.3109 | 1408.58887 | 705.301697 | 2 | 13 | 12.6237 | 17.44 |
| 32 | 41.57 | 43.64 | 69.8 | BMP7_FlexIII  | 99.0 | QPFMVAFFK                                   | Gln->pyro-Glu @ N-term; Label: 13C(6)15N(2)(K) @ 9                                                                                                                                               |                                 | -0.00922754 | 1104.54663 | 553.2806 | 1104.55579 | 553.285156 | 2 | 12 | 20.5801 | 17.44 |
| 32 | 41.57 | 43.64 | 69.8 | BMP7_FlexIII  | 99.0 | SALADSLDNEVHSSFIHR                          | Label: 13C(6)15N(4)(R) @ 19                                                                                                                                                                      |                                 | -0.00259258 | 2154.03467 | 539.5159 | 2154.03687 | 539.516541 | 4 | 16 | 18.1174 | 17.44 |
| 32 | 41.57 | 43.64 | 69.8 | BMP7_FlexIII  | 99.0 | TLWASEEGVLVFDITATSNHWVWVNR                  | Label: 13C(6)15N(4)(R) @ 26                                                                                                                                                                      |                                 | -0.0129361  | 3037.48413 | 1013.502 | 3037.49609 | 1013.50598 | 3 | 11 | 21.8998 | 17.44 |
| 32 | 41.57 | 43.64 | 69.8 | BMP7_FlexIII  | 99.0 | AAAPHSFVALWAPLFLLR                          | Label: 13C(6)15N(4)(R) @ 18                                                                                                                                                                      |                                 | 0.00774587  | 1989.13049 | 664.0508 | 1989.1228  | 664.048218 | 3 | 18 | 20.3989 | 17.44 |
| 32 | 41.57 | 43.64 | 69.8 | BMP7_FlexIII  | 99.0 | AAAPHSFVALWAPLFLLR                          | Label: 13C(6)15N(4)(R) @ 18                                                                                                                                                                      |                                 | 0.00510247  | 1989.12793 | 995.5712 | 1989.1228  | 995.568665 | 2 | 22 | 20.4335 | 17.44 |
| 32 | 41.57 | 43.64 | 69.8 | BMP7_FlexIII  | 99.0 | AAAPHSFVALWAPLFLLR                          | Label: 13C(6)15N(4)(R) @ 18                                                                                                                                                                      |                                 | 0.00774587  | 1989.13049 | 664.0508 | 1989.1228  | 664.048218 | 3 | 17 | 20.9181 | 17.44 |
| 32 | 41.57 | 43.64 | 69.8 | BMP7_FlexIII  | 99.0 | AAAPHSFVALWAPLFLLR                          | Label: 13C(6)15N(4)(R) @ 18                                                                                                                                                                      |                                 | 0.00719655  | 1989.13001 | 664.0506 | 1989.1228  | 664.048218 | 3 | 16 | 26.4535 | 17.44 |
| 32 | 41.57 | 43.64 | 69.8 | BMP7_FlexIII  | 99.0 | AAAPHSFVALWAPLFLLR                          | Label: 13C(6)15N(4)(R) @ 18                                                                                                                                                                      |                                 | -0.00044392 | 1989.12207 | 664.048  | 1989.1228  | 664.048218 | 3 | 18 | 20.4364 | 17.44 |
| 32 | 41.57 | 43.64 | 69.8 | BMP7_FlexIII  | 99.0 | AAAPHSFVALWAPLFLLR                          | Label: 13C(6)15N(4)(R) @ 18                                                                                                                                                                      |                                 | -0.00190877 | 1989.12061 | 664.0475 | 1989.1228  | 664.048218 | 3 | 18 | 20.6944 | 17.44 |
| 32 | 41.57 | 43.64 | 69.8 | BMP7_FlexIII  | 99.0 | AAAPHSFVALWAPLFLLR                          | Label: 13C(6)15N(4)(R) @ 18                                                                                                                                                                      |                                 | -0.0121145  | 1989.11072 | 995.5626 | 1989.1228  | 995.568665 | 2 | 19 | 20.7589 | 17.44 |
| 32 | 41.57 | 43.64 | 69.8 | BMP7_FlexIII  | 99.0 | AAAPHSFVALWAPLFLLR                          | Label: 13C(6)15N(4)(R) @ 18                                                                                                                                                                      |                                 | 0.00175335  | 1989.12463 | 664.0488 | 1989.1228  | 664.048218 | 3 | 16 | 20.9448 | 17.44 |
| 32 | 41.57 | 43.64 | 69.8 | BMP7_FlexIII  | 99.0 | AAAPHSFVALWAPLFLLR                          | Label: 13C(6)15N(4)(R) @ 18                                                                                                                                                                      |                                 | 0.0178667   | 1989.14038 | 664.0541 | 1989.1228  | 664.048218 | 3 | 15 | 26.4647 | 17.44 |
| 32 | 41.57 | 43.64 | 69.8 | BMP7_FlexIII  | 99.0 | AAAPHSFVALWAPLFLLR                          | Label: 13C(6)15N(4)(R) @ 18                                                                                                                                                                      |                                 | 0.0072345   | 1989.13001 | 664.0506 | 1989.1228  | 664.048218 | 3 | 18 | 20.5587 | 17.44 |
| 32 | 41.57 | 43.64 | 69.8 | BMP7_FlexIII  | 99.0 | ACGCHYPTFLYK                                | Propionamide(C) @ 2; Propionamide(C) @ 4; Label: 13C(6)15N(2)(K) @ 12                                                                                                                            |                                 | 0.00064526  | 1551.71008 | 776.8623 | 1551.70935 | 776.862    | 2 | 17 | 17.0304 | 17.44 |
| 32 | 41.57 | 43.64 | 69.8 | BMP7_FlexIII  | 99.0 | ACGCHYPTFLYK                                | Propionamide(C) @ 2; Propionamide(C) @ 4; Label: 13C(6)15N(2)(K) @ 12                                                                                                                            |                                 | -0.00167739 | 1551.70789 | 518.2432 | 1551.70935 | 518.243713 | 3 | 13 | 17.1274 | 17.44 |
| 32 | 41.57 | 43.64 | 69.8 | BMP7_FlexIII  | 99.0 | ACGCHYPTFLYK                                | Propionamide(C) @ 2; Propionamide(C) @ 4; Label: 13C(6)15N(2)(K) @ 12                                                                                                                            |                                 | -0.00022541 | 1551.70923 | 776.8619 | 1551.70935 | 776.862    | 2 | 18 | 17.1316 | 17.44 |
| 32 | 41.57 | 43.64 | 69.8 | BMP7_FlexIII  | 99.0 | ACGCHYPTFLYK                                | Propionamide(C) @ 2; Propionamide(C) @ 4; Label: 13C(6)15N(2)(K) @ 12                                                                                                                            |                                 | -0.00022541 | 1551.70923 | 776.8619 | 1551.70935 | 776.862    | 2 | 11 | 17.4046 | 17.44 |
| 32 | 41.57 | 43.64 | 69.8 | BMP7_FlexIII  | 99.0 | AVFSTQGPPPLASQDSHFLTDADMVMSFVNLVEHDKFEFFHPR | Deamidated(Q) @ 14; Label: 13C(6)15N(2)(K) @ 36; Label: 13C(6)15N(4)(R) @ 42                                                                                                                     | missed K-E @ 36                 | 0.0134962   | 4778.30273 | 1195.583 | 4778.29053 | 1195.57983 | 4 | 12 | 20.4387 | 17.44 |
| 32 | 41.57 | 43.64 | 69.8 | BMP7_FlexIII  | 99.0 | AVFSTQGPPPLASQDSHFLTDADMVMSFVNLVEHDKFEFFHPR | Deamidated(Q) @ 14; Oxidation(M) @ 26; Label: 13C(6)15N(2)(K) @ 36; Label: 13C(6)15N(4)(R) @ 42                                                                                                  | missed K-E @ 36                 | 0.0407437   | 4794.32617 | 959.8725 | 4794.28516 | 959.864319 | 5 | 11 | 20.4565 | 17.44 |
| 32 | 41.57 | 43.64 | 69.8 | BMP7_FlexIII  | 99.0 | ERFDNETFR                                   | Label: 13C(6)15N(4)(R) @ 2; Label: 13C(6)15N(4)(R) @ 9                                                                                                                                           | missed R-F @ 2                  | -0.00082387 | 1232.56812 | 617.2913 | 1232.56885 | 617.291748 | 2 | 11 | 15.3669 | 17.44 |
| 32 | 41.57 | 43.64 | 69.8 | BMP7_FlexIII  | 99.0 | ESDLFLDSR                                   | Label: 13C(6)15N(4)(R) @ 10                                                                                                                                                                      |                                 | 0.00691769  | 1203.60803 | 602.8113 | 1203.60107 | 602.8078   | 2 | 11 | 18.629  | 17.44 |
| 32 | 41.57 | 43.64 | 69.8 | BMP7_FlexIII  | 99.0 | ESDLFLDSR                                   | Label: 13C(6)15N(4)(R) @ 10                                                                                                                                                                      |                                 | -0.00089484 | 1203.60022 | 602.8074 | 1203.60107 | 602.8078   | 2 | 11 | 18.8895 | 17.44 |
| 32 | 41.57 | 43.64 | 69.8 | BMP7_FlexIII  | 99.0 | HELYVSFR                                    | Label: 13C(6)15N(4)(R) @ 8                                                                                                                                                                       |                                 | -0.00013085 | 1059.53772 | 530.7761 | 1059.53772 | 530.776123 | 2 | 10 | 1       |       |

|    |       |       |                  |                                      |                                                                    |                |            |            |            |            |            |    |         |         |       |
|----|-------|-------|------------------|--------------------------------------|--------------------------------------------------------------------|----------------|------------|------------|------------|------------|------------|----|---------|---------|-------|
| 32 | 41.57 | 43.64 | 69.8 BMP7_FlexII | 99.0 HNLGLQLSVETLDGGSINPK            | Label: 13C(6)15N(2)(K) @ 20                                        | 0.00373355     | 2170.15112 | 724.391    | 2170.14746 | 724.38971  | 3          | 20 | 18.67   | 17.44   |       |
| 32 | 41.57 | 43.64 | 69.8 BMP7_FlexII | 99.0 HNLGLQLSVETLDGGSINPK            | Deamidated(Q) @ 15; Label: 13C(6)15N(2)(K) @ 20                    | 0.00958865     | 2171.14087 | 724.7209   | 2171.13135 | 724.717712 | 3          | 12 | 18.9458 | 17.44   |       |
| 32 | 41.57 | 43.64 | 69.8 BMP7_FlexII | 99.0 HNLGLQLSVETLDGGSINPK            | Deamidated(Q) @ 6; Label: 13C(6)15N(2)(K) @ 20                     | 0.039618       | 2171.17114 | 724.731    | 2171.13135 | 724.717712 | 3          | 14 | 19.6197 | 17.44   |       |
| 32 | 41.57 | 43.64 | 69.8 BMP7_FlexII | 99.0 HNLGLQLSVETLDGGSINPK            | Deamidated(Q) @ 6; Label: 13C(6)15N(2)(K) @ 20                     | 0.00958865     | 2171.14087 | 724.7209   | 2171.13135 | 724.717712 | 3          | 15 | 19.896  | 17.44   |       |
| 32 | 41.57 | 43.64 | 69.8 BMP7_FlexII | 99.0 HNLGLQLSVETLDGGSINPK            | Deamidated(Q) @ 15; Label: 13C(6)15N(2)(K) @ 20                    | 0.00958865     | 2171.14087 | 724.7209   | 2171.13135 | 724.717712 | 3          | 20 | 26.5109 | 17.44   |       |
| 32 | 41.57 | 43.64 | 69.8 BMP7_FlexII | 99.0 HNLGLQLSVETLDGGSINPK            | Label: 13C(6)15N(2)(K) @ 20                                        | 0.00373355     | 2170.15112 | 724.391    | 2170.14746 | 724.38971  | 3          | 20 | 26.7829 | 17.44   |       |
| 32 | 41.57 | 43.64 | 69.8 BMP7_FlexII | 99.0 HNLGLQLSVETLDGGSINPK            | Label: 13C(6)15N(2)(K) @ 20                                        | 0.00373355     | 2170.15112 | 724.391    | 2170.14746 | 724.38971  | 3          | 19 | 27.0516 | 17.44   |       |
| 32 | 41.57 | 43.64 | 69.8 BMP7_FlexII | 99.0 HNLGLQLSVETLDGGSINPK            | Label: 13C(6)15N(2)(K) @ 20                                        | 0.00386579     | 2170.15137 | 1086.083   | 2170.14746 | 1086.08093 | 2          | 32 | 18.1622 | 17.44   |       |
| 32 | 41.57 | 43.64 | 69.8 BMP7_FlexII | 99.0 HNLGLQLSVETLDGGSINPK            | Label: 13C(6)15N(2)(K) @ 20                                        | 0.00959387     | 2170.15332 | 724.3917   | 2170.14746 | 724.38971  | 3          | 24 | 18.1743 | 17.44   |       |
| 32 | 41.57 | 43.64 | 69.8 BMP7_FlexII | 99.0 HNLGLQLSVETLDGGSINPK            | Label: 13C(6)15N(2)(K) @ 20                                        | -0.00539871    | 2170.14185 | 724.3879   | 2170.14746 | 724.38971  | 3          | 23 | 18.4362 | 17.44   |       |
| 32 | 41.57 | 43.64 | 69.8 BMP7_FlexII | 99.0 HNLGLQLSVETLDGGSINPK            | Label: 13C(6)15N(2)(K) @ 20                                        | -0.00174946    | 2170.14526 | 1086.08    | 2170.14746 | 1086.08093 | 2          | 28 | 18.4384 | 17.44   |       |
| 32 | 41.57 | 43.64 | 69.8 BMP7_FlexII | 99.0 HNLGLQLSVETLDGGSINPK            | Deamidated(Q) @ 6; Label: 13C(6)15N(2)(K) @ 20                     | 0.0118098      | 2171.14331 | 724.7217   | 2171.13135 | 724.717712 | 3          | 15 | 18.714  | 17.44   |       |
| 32 | 41.57 | 43.64 | 69.8 BMP7_FlexII | 99.0 HNLGLQLSVETLDGGSINPK            | Label: 13C(6)15N(2)(K) @ 20                                        | 0.00959387     | 2170.15332 | 724.3917   | 2170.14746 | 724.38971  | 3          | 22 | 19.0007 | 17.44   |       |
| 32 | 41.57 | 43.64 | 69.8 BMP7_FlexII | 99.0 HNLGLQLSVETLDGGSINPK            | Deamidated(Q) @ 15; Label: 13C(6)15N(2)(K) @ 20                    | 0.0418392      | 2171.17334 | 724.7317   | 2171.13135 | 724.717712 | 3          | 13 | 19.7063 | 17.44   |       |
| 32 | 41.57 | 43.64 | 69.8 BMP7_FlexII | 99.0 HNLGLQLSVETLDGGSINPK            | Label: 13C(6)15N(2)(K) @ 20                                        | -0.0019197     | 2170.14551 | 724.3891   | 2170.14746 | 724.38971  | 3          | 23 | 19.9838 | 17.44   |       |
| 32 | 41.57 | 43.64 | 69.8 BMP7_FlexII | 99.0 HNLGLQLSVETLDGGSINPK            | Label: 13C(6)15N(2)(K) @ 20                                        | 0.0317718      | 2170.1792  | 724.4003   | 2170.14746 | 724.38971  | 3          | 24 | 26.5151 | 17.44   |       |
| 32 | 41.57 | 43.64 | 69.8 BMP7_FlexII | 99.0 HNLGLQLSVETLDGGSINPK            | Deamidated(Q) @ 6; Label: 13C(6)15N(2)(K) @ 20                     | 0.0118098      | 2171.14331 | 724.7217   | 2171.13135 | 724.717712 | 3          | 17 | 26.7826 | 17.44   |       |
| 32 | 41.57 | 43.64 | 69.8 BMP7_FlexII | 99.0 HNLGLQLSVETLDGGSINPK            | Label: 13C(6)15N(2)(K) @ 20                                        | 0.00959387     | 2170.15332 | 724.3917   | 2170.14746 | 724.38971  | 3          | 19 | 27.0549 | 17.44   |       |
| 32 | 41.57 | 43.64 | 69.8 BMP7_FlexII | 99.0 HNLGLQLSVETLDGGSINPK            | Label: 13C(6)15N(2)(K) @ 20                                        | 0.00445496     | 2170.15137 | 1086.083   | 2170.14746 | 1086.08093 | 2          | 24 | 18.2357 | 17.44   |       |
| 32 | 41.57 | 43.64 | 69.8 BMP7_FlexII | 99.0 HNLGLQLSVETLDGGSINPK            | Label: 13C(6)15N(2)(K) @ 20                                        | 0.00478847     | 2170.1521  | 724.3913   | 2170.14746 | 724.38971  | 3          | 18 | 26.7051 | 17.44   |       |
| 32 | 41.57 | 43.64 | 69.8 BMP7_FlexII | 99.0 HNSAPMFMLDLYNAMAVEEGGPGGQGFSPYK | Deamidated(N) @ 13; Oxidation(M) @ 15; Label: 13C(6)15N(2)(K) @ 33 | 0.0132412      | 3559.57422 | 1187.532   | 3559.56152 | 1187.52771 | 3          | 26 | 19.7189 | 17.44   |       |
| 32 | 41.57 | 43.64 | 69.8 BMP7_FlexII | 99.0 HNSAPMFMLDLYNAMAVEEGGPGGQGFSPYK | Deamidated(N) @ 13; Label: 13C(6)15N(2)(K) @ 33                    | 0.0178808      | 3543.58423 | 1182.202   | 3543.56641 | 1182.19617 | 3          | 26 | 20.2179 | 17.44   |       |
| 32 | 41.57 | 43.64 | 69.8 BMP7_FlexII | 99.0 HNSAPMFMLDLYNAMAVEEGGPGGQGFSPYK | Deamidated(N) @ 13; Oxidation(M) @ 15; Label: 13C(6)15N(2)(K) @ 33 | 0.0166602      | 3559.57715 | 1187.533   | 3559.56152 | 1187.52771 | 3          | 26 | 19.7676 | 17.44   |       |
| 32 | 41.57 | 43.64 | 69.8 BMP7_FlexII | 99.0 HNSAPMFMLDLYNAMAVEEGGPGGQGFSPYK | Deamidated(N) @ 13; Label: 13C(6)15N(2)(K) @ 33                    | 0.021286       | 3543.58716 | 1182.203   | 3543.56641 | 1182.19617 | 3          | 23 | 20.2518 | 17.44   |       |
| 32 | 41.57 | 43.64 | 69.8 BMP7_FlexII | 99.0 HNSAPMFMLDLYNAMAVEEGGPGGQGFSPYK | Deamidated(N) @ 13; Label: 13C(6)15N(2)(K) @ 33                    | 0.0813448      | 3543.64722 | 1182.223   | 3543.56641 | 1182.19617 | 3          | 21 | 26.5987 | 17.44   |       |
| 32 | 41.57 | 43.64 | 69.8 BMP7_FlexII | 99.0 ISVYQVLQEHGR                    | Label: 13C(6)15N(4)(R) @ 13                                        | 0.00098278     | 1550.84522 | 517.9557   | 1550.84448 | 517.955444 | 3          | 11 | 18.9536 | 17.44   |       |
| 32 | 41.57 | 43.64 | 69.8 BMP7_FlexII | 99.0 ISVYQVLQEHGR                    | Label: 13C(6)15N(4)(R) @ 13                                        | 0.0021846      | 1550.84668 | 776.4306   | 1550.84448 | 776.429504 | 2          | 19 | 19.0002 | 17.44   |       |
| 32 | 41.57 | 43.64 | 69.8 BMP7_FlexII | 99.0 ISVYQVLQEHGR                    | Label: 13C(6)15N(4)(R) @ 13                                        | -0.0013595     | 1550.84326 | 517.955    | 1550.84448 | 517.955444 | 3          | 12 | 19.0483 | 17.44   |       |
| 32 | 41.57 | 43.64 | 69.8 BMP7_FlexII | 99.0 ISVYQVLQEHGR                    | Label: 13C(6)15N(4)(R) @ 13                                        | 0.00033662     | 1550.84485 | 776.4297   | 1550.84448 | 776.429504 | 2          | 18 | 19.0757 | 17.44   |       |
| 32 | 41.57 | 43.64 | 69.8 BMP7_FlexII | 99.0 ISVYQVLQEHGR                    | Label: 13C(6)15N(4)(R) @ 13                                        | -0.0132614     | 1550.83118 | 517.951    | 1550.84448 | 517.955444 | 3          | 10 | 19.3085 | 17.44   |       |
| 32 | 41.57 | 43.64 | 69.8 BMP7_FlexII | 99.0 KHELVSFR                        | Label: 13C(6)15N(2)(K) @ 1; Label: 13C(6)15N(4)(R) @ 9             | missed K-H @ 1 | 0.0130705  | 1195.66003 | 399.5606   | 1195.64685 | 399.566244 | 3  | 12      | 15.8587 | 17.44 |
| 32 | 41.57 | 43.64 | 69.8 BMP7_FlexII | 99.0 LAGLGR                          |                                                                    | -0.0004049     | 698.443481 | 350.229    | 698.443909 | 350.229218 | 2          | 8  | 16.3395 | 17.44   |       |
| 32 | 41.57 | 43.64 | 69.8 BMP7_FlexII | 99.0 MANVAENSSSDOR                   | Label: 13C(6)15N(4)(R) @ 13                                        | -0.00584705    | 1417.6073  | 709.8109   | 1417.61316 | 709.813843 | 2          | 12 | 12.4945 | 17.44   |       |
| 32 | 41.57 | 43.64 | 69.8 BMP7_FlexII | 99.0 MANVAENSSSDOR                   | Label: 13C(6)15N(4)(R) @ 13                                        | 0.0159614      | 1417.62903 | 473.5503   | 1417.61316 | 473.544983 | 3          | 14 | 12.6171 | 17.44   |       |
| 32 | 41.57 | 43.64 | 69.8 BMP7_FlexII | 99.0 MANVAENSSSDOR                   | Label: 13C(6)15N(4)(R) @ 13                                        | 0.00159926     | 1417.61462 | 709.8146   | 1417.61316 | 709.813843 | 2          | 17 | 12.7499 | 17.44   |       |
| 32 | 41.57 | 43.64 | 69.8 BMP7_FlexII | 99.0 MANVAENSSSDOR                   | Label: 13C(6)15N(4)(R) @ 13                                        | -0.00145251    | 1417.61169 | 709.8131   | 1417.61316 | 709.813843 | 2          | 17 | 13.0131 | 17.44   |       |
| 32 | 41.57 | 43.64 | 69.8 BMP7_FlexII | 99.0 MANVAENSSSDOR                   | Deamidated(N) @ 7; Label: 13C(6)15N(4)(R) @ 13                     | 0.0101399      | 1418.6073  | 710.3109   | 1418.59717 | 710.305847 | 2          | 16 | 13.2946 | 17.44   |       |
| 32 | 41.57 | 43.64 | 69.8 BMP7_FlexII | 99.0 MANVAENSSSDOR                   | Label: 13C(6)15N(4)(R) @ 13                                        | -0.004392      | 1417.60864 | 709.8116   | 1417.61316 | 709.813843 | 2          | 15 | 12.8935 | 17.44   |       |
| 32 | 41.57 | 43.64 | 69.8 BMP7_FlexII | 99.0 MANVAENSSSDOR                   | Label: 13C(6)15N(4)(R) @ 13                                        | -0.0124053     | 1417.60083 | 473.5409   | 1417.61316 | 473.544983 | 3          | 13 | 12.9938 | 17.44   |       |
| 32 | 41.57 | 43.64 | 69.8 BMP7_FlexII | 99.0 MANVAENSSSDOR                   |                                                                    | 0.00384285     | 1407.60864 | 704.8116   | 1407.60496 | 704.809692 | 2          | 14 | 13.0562 | 17.44   |       |
| 32 | 41.57 | 43.64 | 69.8 BMP7_FlexII | 99.0 MANVAENSSSDOR                   | Label: 13C(6)15N(4)(R) @ 13                                        | 0.00244397     | 1417.61572 | 709.8151   | 1417.61316 | 709.813843 | 2          | 16 | 13.1688 | 17.44   |       |
| 32 | 41.57 | 43.64 | 69.8 BMP7_FlexII | 99.0 MANVAENSSSDOR                   | Deamidated(N) @ 7; Label: 13C(6)15N(4)(R) @ 13                     | 0.0115958      | 1418.60864 | 710.3116   | 1418.59717 | 710.305847 | 2          | 15 | 13.4444 | 17.44   |       |
| 32 | 41.57 | 43.64 | 69.8 BMP7_FlexII | 99.0 QPFMVAFFK                       | Gln->pyro-Glu @ N-term; Label: 13C(6)15N(2)(K) @ 9                 | -0.00206109    | 1104.55371 | 553.2841   | 1104.55579 | 553.285156 | 2          | 12 | 20.6265 | 17.44   |       |
| 32 | 41.57 | 43.64 | 69.8 BMP7_FlexII | 99.0 QPFMVAFFK                       | Label: 13C(6)15N(2)(K) @ 9                                         | 0.00015531     | 1121.58252 | 561.7985   | 1121.58228 | 561.798462 | 2          | 9  | 19.8351 | 17.44   |       |
| 32 | 41.57 | 43.64 | 69.8 BMP7_FlexII | 99.0 SALADFSLDNEVHSSFIHR             | Deamidated(N) @ 10; Label: 13C(6)15N(4)(R) @ 19                    | 0.00995752     | 2155.03076 | 719.3509   | 2155.021   | 719.347595 | 3          | 13 | 17.9612 | 17.44   |       |
| 32 | 41.57 | 43.64 | 69.8 BMP7_FlexII | 99.0 SALADFSLDNEVHSSFIHR             | Deamidated(N) @ 10; Label: 13C(6)15N(4)(R) @ 19                    | 0.0482688      | 2155.06934 | 1078.542   | 2155.021   | 1078.5177  | 2          | 17 | 17.9826 | 17.44   |       |
| 32 | 41.57 | 43.64 | 69.8 BMP7_FlexII | 99.0 SALADFSLDNEVHSSFIHR             | Deamidated(N) @ 10; Label: 13C(6)15N(4)(R) @ 19                    | 0.00995752     | 2155.03076 | 719.3509   | 2155.021   | 719.347595 | 3          | 13 | 18.2189 | 17.44   |       |
| 32 | 41.57 | 43.64 | 69.8 BMP7_FlexII | 99.0 SALADFSLDNEVHSSFIHR             | Deamidated(N) @ 10; Label: 13C(6)15N(4)(R) @ 19                    | 0.00995752     | 2155.03076 | 719.3509   | 2155.021   | 719.347595 | 3          | 11 | 18.4942 | 17.44   |       |
| 32 | 41.57 | 43.64 | 69.8 BMP7_FlexII | 99.0 SALADFSLDNEVHSSFIHR             | Deamidated(N) @ 10; Label: 13C(6)15N(4)(R) @ 19                    | 0.00995752     | 2155.03076 | 719.3509   | 2155.021   | 719.347595 | 3          | 12 | 18.7805 | 17.44   |       |
| 32 | 41.57 | 43.64 | 69.8 BMP7_FlexII | 99.0 SALADFSLDNEVHSSFIHR             | Label: 13C(6)15N(4)(R) @ 19                                        | 0.00410242     | 2154.04077 | 719.0209   | 2154.03687 | 719.019592 | 3          | 12 | 19.3911 | 17.44   |       |
| 32 | 41.57 | 43.64 | 69.8 BMP7_FlexII | 99.0 SALADFSLDNEVHSSFIHR             | Label: 13C(6)15N(4)(R) @ 19                                        | 0.00410242     | 2154.04077 | 719.0209   | 2154.03687 | 719.019592 | 3          | 15 | 19.6526 | 17.44   |       |
| 32 | 41.57 | 43.64 | 69.8 BMP7_FlexII | 99.0 SALADFSLDNEVHSSFIHR             | Label: 13C(6)15N(4)(R) @ 19                                        | 0.0159621      | 2154.05298 | 539.5205   | 2154.03687 | 539.516541 | 4          | 14 | 19.6583 | 17.44   |       |
| 32 | 41.57 | 43.64 | 69.8 BMP7_FlexII | 99.0 SALADFSLDNEVHSSFIHR             | Deamidated(N) @ 10; Label: 13C(6)15N(4)(R) @ 19                    | 0.00995752     | 2155.03076 | 719.3509   | 2155.021   | 719.347595 | 3          | 11 | 20.7026 | 17.44   |       |
| 32 | 41.57 | 43.64 | 69.8 BMP7_FlexII | 99.0 SALADFSLDNEVHSSFIHR             | Label: 13C(6)15N(4)(R) @ 19                                        | 0.00410242     | 2154.04077 | 719.0209   | 2154.03687 | 719.019592 | 3          | 12 | 21.1649 | 17.44   |       |
| 32 | 41.57 | 43.64 | 69.8 BMP7_FlexII | 99.0 SALADFSLDNEVHSSFIHR             | Label: 13C(6)15N(4)(R) @ 19                                        | 0.00410242     | 2154.04077 | 719.0209   | 2154.03687 | 719.019592 | 3          | 9  | 21.732  | 17.44   |       |
| 32 | 41.57 | 43.64 | 69.8 BMP7_FlexII | 99.0 SALADFSLDNEVHSSFIHR             | Label: 13C(6)15N(4)(R) @ 19                                        | 0.00546408     | 2154.04248 | 539.5179   | 2154.03687 | 539.516541 | 4          | 15 | 26.5153 | 17.44   |       |
| 32 | 41.57 | 43.64 | 69.8 BMP7_FlexII | 99.0 SALADFSLDNEVHSSFIHR             | Deamidated(N) @ 10; Label: 13C(6)15N(4)(R) @ 19                    | 0.0399869      | 2155.06079 | 719.3609   | 2155.021   | 719.347595 | 3          | 14 | 26.5175 | 17.44   |       |
| 32 | 41.57 | 43.64 | 69.8 BMP7_FlexII | 99.0 SALADFSLDNEVHSSFIHR             | Label: 13C(6)15N(4)(R) @ 19                                        | 0.00424337     | 2154.04126 | 539.5176   | 2154.03687 | 539.516541 | 4          | 14 | 26.7784 | 17.44   |       |
| 32 | 41.57 | 43.64 | 69.8 BMP7_FlexII | 99.0 SALADFSLDNEVHSSFIHR             | Deamidated(N) @ 10; Label: 13C(6)15N(4)(R) @ 19                    | 0.0399869      | 2155.06079 | 719.3609   | 2155.021   | 719.347595 | 3          | 13 | 26.7806 | 17.44   |       |
| 32 | 41.57 | 43.64 | 69.8 BMP7_FlexII | 99.0 SALADFSLDNEVHSSFIHR             | Label: 13C(6)15N(4)(R) @ 19                                        | 0.0159621      | 2154.05298 | 539.5205   | 2154.03687 | 539.516541 | 4          | 9  | 27.0427 | 17.44   |       |
| 32 | 41.57 | 43.64 | 69.8 BMP7_FlexII | 99.0 SALADFSLDNEVHSSFIHR             | Label: 13C(6)15N(4)(R) @ 19                                        | 0.00410242     | 2154.04077 | 719.0209   | 2154.03687 | 719.019592 | 3          | 11 | 27.1311 | 17.44   |       |
| 32 | 41.57 | 43.64 | 69.8 BMP7_FlexII | 99.0 SALADFSLDNEVHSSFIHR             | Deamidated(N) @ 10; Label: 13C(6)15N(4)(R) @ 19                    | 0.0121648      | 2155.03296 | 719.35     |            |            |            |    |         |         |       |

|    |       |       |                   |                                  |                                                                                                    |                      |             |            |            |            |            |    |         |         |       |
|----|-------|-------|-------------------|----------------------------------|----------------------------------------------------------------------------------------------------|----------------------|-------------|------------|------------|------------|------------|----|---------|---------|-------|
| 32 | 41.57 | 43.64 | 69.8 BMP7_FlexII  | 99.0 SALADFSLDNEVHSSFIHR         | Deamidated(N) @ 10; Label: 13C(6)15N(4)(R) @ 19                                                    | 0.0121648            | 2155.03296  | 719.3516   | 2155.021   | 719.347595 | 3          | 11 | 18.5606 | 17.44   |       |
| 32 | 41.57 | 43.64 | 69.8 BMP7_FlexII  | 99.0 SALADFSLDNEVHSSFIHR         | Label: 13C(6)15N(4)(R) @ 19                                                                        | 0.00630883           | 2154.04346  | 719.0217   | 2154.03687 | 719.019592 | 3          | 15 | 18.858  | 17.44   |       |
| 32 | 41.57 | 43.64 | 69.8 BMP7_FlexII  | 99.0 SALADFSLDNEVHSSFIHR         | Deamidated(N) @ 10; Label: 13C(6)15N(4)(R) @ 19                                                    | 0.0121648            | 2155.03296  | 719.3516   | 2155.021   | 719.347595 | 3          | 13 | 19.2457 | 17.44   |       |
| 32 | 41.57 | 43.64 | 69.8 BMP7_FlexII  | 99.0 SALADFSLDNEVHSSFIHR         | Deamidated(N) @ 10; Label: 13C(6)15N(4)(R) @ 19                                                    | 0.0342725            | 2155.05542  | 539.7711   | 2155.021   | 539.762512 | 4          | 11 | 19.377  | 17.44   |       |
| 32 | 41.57 | 43.64 | 69.8 BMP7_FlexII  | 99.0 SALADFSLDNEVHSSFIHR         | Label: 13C(6)15N(4)(R) @ 19                                                                        | 0.00630883           | 2154.04346  | 719.0217   | 2154.03687 | 719.019592 | 3          | 13 | 19.6009 | 17.44   |       |
| 32 | 41.57 | 43.64 | 69.8 BMP7_FlexII  | 99.0 SALADFSLDNEVHSSFIHR         | Deamidated(N) @ 10; Label: 13C(6)15N(4)(R) @ 19                                                    | -0.00576674          | 2155.01489  | 539.761    | 2155.021   | 539.762512 | 4          | 11 | 19.6502 | 17.44   |       |
| 32 | 41.57 | 43.64 | 69.8 BMP7_FlexII  | 99.0 SALADFSLDNEVHSSFIHR         | Label: 13C(6)15N(4)(R) @ 19                                                                        | 0.0182846            | 2154.05542  | 539.5211   | 2154.03687 | 539.516541 | 4          | 14 | 19.7974 | 17.44   |       |
| 32 | 41.57 | 43.64 | 69.8 BMP7_FlexII  | 99.0 SALADFSLDNEVHSSFIHR         | Label: 13C(6)15N(4)(R) @ 19                                                                        | 0.00630883           | 2154.04346  | 719.0217   | 2154.03687 | 719.019592 | 3          | 15 | 19.8785 | 17.44   |       |
| 32 | 41.57 | 43.64 | 69.8 BMP7_FlexII  | 99.0 SALADFSLDNEVHSSFIHR         | Label: 13C(6)15N(4)(R) @ 19                                                                        | 0.0182846            | 2154.05542  | 539.5211   | 2154.03687 | 539.516541 | 4          | 11 | 20.4214 | 17.44   |       |
| 32 | 41.57 | 43.64 | 69.8 BMP7_FlexII  | 99.0 SALADFSLDNEVHSSFIHR         | Label: 13C(6)15N(4)(R) @ 19                                                                        | 0.00630883           | 2154.04346  | 719.0217   | 2154.03687 | 719.019592 | 3          | 13 | 20.8283 | 17.44   |       |
| 32 | 41.57 | 43.64 | 69.8 BMP7_FlexII  | 99.0 SALADFSLDNEVHSSFIHR         | Label: 13C(6)15N(4)(R) @ 19                                                                        | 0.00630883           | 2154.04346  | 719.0217   | 2154.03687 | 719.019592 | 3          | 10 | 21.5024 | 17.44   |       |
| 32 | 41.57 | 43.64 | 69.8 BMP7_FlexII  | 99.0 SALADFSLDNEVHSSFIHR         | Label: 13C(6)15N(4)(R) @ 19                                                                        | 0.0182846            | 2154.05542  | 539.5211   | 2154.03687 | 539.516541 | 4          | 12 | 26.5107 | 17.44   |       |
| 32 | 41.57 | 43.64 | 69.8 BMP7_FlexII  | 99.0 SALADFSLDNEVHSSFIHR         | Deamidated(N) @ 10; Label: 13C(6)15N(4)(R) @ 19                                                    | 0.0421942            | 2155.06299  | 719.3616   | 2155.021   | 719.347595 | 3          | 12 | 26.5305 | 17.44   |       |
| 32 | 41.57 | 43.64 | 69.8 BMP7_FlexII  | 99.0 SALADFSLDNEVHSSFIHR         | Deamidated(N) @ 10; Label: 13C(6)15N(4)(R) @ 19                                                    | 0.0342725            | 2155.05542  | 539.7711   | 2155.021   | 539.762512 | 4          | 13 | 26.7651 | 17.44   |       |
| 32 | 41.57 | 43.64 | 69.8 BMP7_FlexII  | 99.0 SALADFSLDNEVHSSFIHR         | Label: 13C(6)15N(4)(R) @ 19                                                                        | 0.00630883           | 2154.04346  | 719.0217   | 2154.03687 | 719.019592 | 3          | 15 | 26.7912 | 17.44   |       |
| 32 | 41.57 | 43.64 | 69.8 BMP7_FlexII  | 99.0 SALADFSLDNEVHSSFIHR         | Deamidated(N) @ 10; Label: 13C(6)15N(4)(R) @ 19                                                    | 0.0342725            | 2155.05542  | 539.7711   | 2155.021   | 539.762512 | 4          | 11 | 27.0209 | 17.44   |       |
| 32 | 41.57 | 43.64 | 69.8 BMP7_FlexII  | 99.0 SALADFSLDNEVHSSFIHR         | Deamidated(N) @ 10; Label: 13C(6)15N(4)(R) @ 19                                                    | 0.0121648            | 2155.03296  | 719.3516   | 2155.021   | 719.347595 | 3          | 13 | 27.0438 | 17.44   |       |
| 32 | 41.57 | 43.64 | 69.8 BMP7_FlexII  | 99.0 SALADFSLDNEVHSSFIHR         | Deamidated(N) @ 10; Label: 13C(6)15N(4)(R) @ 19                                                    | 0.0121648            | 2155.03296  | 719.3516   | 2155.021   | 719.347595 | 3          | 6  | 27.3445 | 17.44   |       |
| 32 | 41.57 | 43.64 | 69.8 BMP7_FlexII  | 99.0 SALADFSLDNEVHSSFIHR         | Label: 13C(6)15N(4)(R) @ 19                                                                        | 0.00418388           | 2154.04126  | 719.021    | 2154.03687 | 719.019592 | 3          | 15 | 18.0754 | 17.44   |       |
| 32 | 41.57 | 43.64 | 69.8 BMP7_FlexII  | 99.0 SALADFSLDNEVHSSFIHR         | Label: 13C(6)15N(4)(R) @ 19                                                                        | 0.0134896            | 2154.05054  | 539.5199   | 2154.03687 | 539.516541 | 4          | 15 | 18.1506 | 17.44   |       |
| 32 | 41.57 | 43.64 | 69.8 BMP7_FlexII  | 99.0 SALADFSLDNEVHSSFIHR         | Label: 13C(6)15N(4)(R) @ 19                                                                        | 0.00113774           | 2154.03833  | 719.02     | 2154.03687 | 719.019592 | 3          | 15 | 18.1885 | 17.44   |       |
| 32 | 41.57 | 43.64 | 69.8 BMP7_FlexII  | 99.0 SALADFSLDNEVHSSFIHR         | Label: 13C(6)15N(4)(R) @ 19                                                                        | 0.00410242           | 2154.04077  | 719.0209   | 2154.03687 | 719.019592 | 3          | 9  | 21.4417 | 17.44   |       |
| 32 | 41.57 | 43.64 | 69.8 BMP7_FlexII  | 99.0 SALADFSLDNEVHSSFIHR         | Deamidated(N) @ 10; Label: 13C(6)15N(4)(R) @ 19                                                    | 0.0303084            | 2155.05127  | 539.7701   | 2155.021   | 539.762512 | 4          | 12 | 18.1704 | 17.44   |       |
| 32 | 41.57 | 43.64 | 69.8 BMP7_FlexII  | 99.0 SALADFSLDNEVHSSFIHR         | Deamidated(N) @ 10; Label: 13C(6)15N(4)(R) @ 19                                                    | 0.0294802            | 2155.05054  | 539.7699   | 2155.021   | 539.762512 | 4          | 10 | 26.6679 | 17.44   |       |
| 32 | 41.57 | 43.64 | 69.8 BMP7_FlexII  | 99.0 SALADFSLDNEVHSSFIHR         | Label: 13C(6)15N(4)(R) @ 19                                                                        | 0.0143247            | 2154.05127  | 539.5201   | 2154.03687 | 539.516541 | 4          | 9  | 26.6284 | 17.44   |       |
| 32 | 41.57 | 43.64 | 69.8 BMP7_FlexII  | 99.0 TLWASEEGWLVPDITATSNHWVVNPR  | Deamidated(N) @ 19; Label: 13C(6)15N(4)(R) @ 26                                                    | 0.0231315            | 3038.50415  | 1013.842   | 3038.48023 | 1013.83398 | 3          | 13 | 20.3234 | 17.44   |       |
| 32 | 41.57 | 43.64 | 69.8 BMP7_FlexII  | 99.0 TLWASEEGWLVPDITATSNHWVVNPR  | Label: 13C(6)15N(4)(R) @ 26                                                                        | -0.00107633          | 3037.49487  | 760.381    | 3037.49609 | 760.381348 | 4          | 23 | 20.3798 | 17.44   |       |
| 32 | 41.57 | 43.64 | 69.8 BMP7_FlexII  | 99.0 TLWASEEGWLVPDITATSNHWVVNPR  | Deamidated(N) @ 19; Label: 13C(6)15N(4)(R) @ 26                                                    | 0.0231315            | 3038.50415  | 1013.842   | 3038.48023 | 1013.83398 | 3          | 11 | 20.8661 | 17.44   |       |
| 32 | 41.57 | 43.64 | 69.8 BMP7_FlexII  | 99.0 TLWASEEGWLVPDITATSNHWVVNPR  | Deamidated(N) @ 19; Label: 13C(6)15N(4)(R) @ 26                                                    | 0.0231315            | 3038.50415  | 1013.842   | 3038.48023 | 1013.83398 | 3          | 11 | 21.2425 | 17.44   |       |
| 32 | 41.57 | 43.64 | 69.8 BMP7_FlexII  | 99.0 TLWASEEGWLVPDITATSNHWVVNPR  | Deamidated(N) @ 19; Label: 13C(6)15N(4)(R) @ 26                                                    | 0.0149106            | 3038.49487  | 760.631    | 3038.48023 | 760.627319 | 4          | 16 | 26.4623 | 17.44   |       |
| 32 | 41.57 | 43.64 | 69.8 BMP7_FlexII  | 99.0 TLWASEEGWLVPDITATSNHWVVNPR  | Deamidated(N) @ 19; Label: 13C(6)15N(4)(R) @ 26                                                    | 0.0231315            | 3038.50415  | 1013.842   | 3038.48023 | 1013.83398 | 3          | 12 | 26.7041 | 17.44   |       |
| 32 | 41.57 | 43.64 | 69.8 BMP7_FlexII  | 99.0 TLWASEEGWLVPDITATSNHWVVNPR  | Deamidated(N) @ 19; Label: 13C(6)15N(4)(R) @ 26                                                    | 0.0179961            | 3038.49805  | 760.6318   | 3038.48023 | 760.627319 | 4          | 17 | 20.4103 | 17.44   |       |
| 32 | 41.57 | 43.64 | 69.8 BMP7_FlexII  | 99.0 TLWASEEGWLVPDITATSNHWVVNPR  | Deamidated(N) @ 19; Label: 13C(6)15N(4)(R) @ 26                                                    | -0.00392847          | 3038.4773   | 1013.833   | 3038.48023 | 1013.83398 | 3          | 12 | 20.6252 | 17.44   |       |
| 32 | 41.57 | 43.64 | 69.8 BMP7_FlexII  | 99.0 TLWASEEGWLVPDITATSNHWVVNPR  | Label: 13C(6)15N(4)(R) @ 26                                                                        | -0.0096753           | 3037.48706  | 1013.503   | 3037.49609 | 1013.50598 | 3          | 19 | 20.9817 | 17.44   |       |
| 32 | 41.57 | 43.64 | 69.8 BMP7_FlexII  | 99.0 TLWASEEGWLVPDITATSNHWVVNPR  | Deamidated(N) @ 19; Label: 13C(6)15N(4)(R) @ 26                                                    | 0.0261009            | 3038.50732  | 1013.843   | 3038.48023 | 1013.83398 | 3          | 14 | 21.2693 | 17.44   |       |
| 32 | 41.57 | 43.64 | 69.8 BMP7_FlexII  | 99.0 TLWASEEGWLVPDITATSNHWVVNPR  | Label: 13C(6)15N(4)(R) @ 26                                                                        | 0.0200619            | 3037.51709  | 1013.513   | 3037.49609 | 1013.50598 | 3          | 16 | 21.3031 | 17.44   |       |
| 32 | 41.57 | 43.64 | 69.8 BMP7_FlexII  | 99.0 TLWASEEGWLVPDITATSNHWVVNPR  | Deamidated(N) @ 19; Label: 13C(6)15N(4)(R) @ 26                                                    | 0.0261009            | 3038.50732  | 1013.843   | 3038.48023 | 1013.83398 | 3          | 11 | 21.5553 | 17.44   |       |
| 32 | 41.57 | 43.64 | 69.8 BMP7_FlexII  | 99.0 TLWASEEGWLVPDITATSNHWVVNPR  | Deamidated(N) @ 19; Label: 13C(6)15N(4)(R) @ 26                                                    | 0.0261009            | 3038.50732  | 1013.843   | 3038.48023 | 1013.83398 | 3          | 11 | 21.8131 | 17.44   |       |
| 32 | 41.57 | 43.64 | 69.8 BMP7_FlexII  | 99.0 TLWASEEGWLVPDITATSNHWVVNPR  | Label: 13C(6)15N(4)(R) @ 26                                                                        | 0.0295963            | 3037.52564  | 760.3887   | 3037.49609 | 760.381348 | 4          | 19 | 26.4756 | 17.44   |       |
| 32 | 41.57 | 43.64 | 69.8 BMP7_FlexII  | 99.0 TLWASEEGWLVPDITATSNHWVVNPR  | Deamidated(N) @ 19; Label: 13C(6)15N(4)(R) @ 26                                                    | 0.0156176            | 3038.49585  | 760.6312   | 3038.48023 | 760.627319 | 4          | 15 | 20.541  | 17.44   |       |
| 32 | 41.57 | 43.64 | 69.8 BMP7_FlexII  | 99.0 TLWASEEGWLVPDITATSNHWVVNPR  | Label: 13C(6)15N(4)(R) @ 26                                                                        | 0.0112796            | 3037.5083   | 1013.51    | 3037.49609 | 1013.50598 | 3          | 19 | 20.4022 | 17.44   |       |
| 32 | 41.57 | 43.64 | 69.8 BMP7_FlexII  | 99.0 TLWASEEGWLVPDITATSNHWVVNPR  | Deamidated(N) @ 19; Label: 13C(6)15N(4)(R) @ 26                                                    | 0.0173146            | 3038.49829  | 1013.84    | 3038.48023 | 1013.83398 | 3          | 17 | 26.519  | 17.44   |       |
| 32 | 41.57 | 43.64 | 69.8 BMP7_FlexII  | 99.0 TLWASEEGWLVPDITATSNHWVVNPR  | Deamidated(N) @ 19; Label: 13C(6)15N(4)(R) @ 26                                                    | 0.0115196            | 3038.49219  | 1013.838   | 3038.48023 | 1013.83398 | 3          | 13 | 26.6694 | 17.44   |       |
| 32 | 41.57 | 43.64 | 69.8 BMP7_FlexII  | 99.0 TLWASEEGWLVPDITATSNHWVVNPR  | Deamidated(N) @ 19; Label: 13C(6)15N(4)(R) @ 26                                                    | 0.0263925            | 3038.50732  | 1013.843   | 3038.48023 | 1013.83398 | 3          | 12 | 20.4119 | 17.44   |       |
| 32 | 41.57 | 43.64 | 69.8 BMP7_FlexII  | 99.0 TLWASEEGWLVPDITATSNHWVVNPR  | Deamidated(N) @ 19; Label: 13C(6)15N(4)(R) @ 26                                                    | 0.0470064            | 3038.52808  | 1013.85    | 3038.48023 | 1013.83398 | 3          | 11 | 26.563  | 17.44   |       |
| 32 | 41.57 | 43.64 | 69.8 BMP7_FlexII  | 99.0 YPTFLYK                     | Label: 13C(6)15N(2)(K) @ 7                                                                         | cleaved H-Y @ N-term | -0.00165037 | 938.497681 | 470.2561   | 938.499329 | 470.256928 | 2  | 9       | 18.0092 | 17.44 |
| 32 | 41.57 | 43.64 | 69.8 BMP7_FlexII  | 99.0 YPTFLYK                     | Label: 13C(6)15N(2)(K) @ 7                                                                         | cleaved H-Y @ N-term | 0.00020099  | 938.499451 | 470.257    | 938.499329 | 470.256928 | 2  | 9       | 17.9008 | 17.44 |
| 32 | 41.57 | 43.64 | 69.8 BMP7_FlexII  | 99.0 YPTFLYK                     | Label: 13C(6)15N(2)(K) @ 7                                                                         | cleaved H-Y @ N-term | -0.00091407 | 938.498474 | 470.2565   | 938.499329 | 470.256928 | 2  | 9       | 17.7612 | 17.44 |
| 33 | 41.31 | 43.51 | 73.9 CDCA7_FlexII | 99.0 AYPTFLYK                    | Label: 13C(6)15N(2)(K) @ 8                                                                         | cleaved Q-A @ N-term | -0.0009432  | 1009.53546 | 505.775    | 1009.53644 | 505.775482 | 2  | 10      | 17.6256 | 7.86  |
| 33 | 41.31 | 43.51 | 73.9 CDCA7_FlexII | 99.0 CATGVLVYLAK                 | Propionamide(C) @ 1; Label: 13C(6)15N(2)(K) @ 11                                                   | 0.00229873           | 1215.68005  | 608.8473   | 1215.67773 | 608.84613  | 2          | 12 | 18.692  | 7.86    |       |
| 33 | 41.31 | 43.51 | 73.9 CDCA7_FlexII | 99.0 DALLDPNWHCPPCR              | Propionamide(C) @ 10; Propionamide(C) @ 13; Label: 13C(6)15N(4)(R) @ 14                            | -0.00264862          | 1787.80847  | 894.9115   | 1787.81116 | 894.912842 | 2          | 16 | 17.4663 | 7.86    |       |
| 33 | 41.31 | 43.51 | 73.9 CDCA7_FlexII | 99.0 GRHPLPGSDSQSR               | Label: 13C(6)15N(4)(R) @ 2; Label: 13C(6)15N(4)(R) @ 13                                            | 0.00528211           | 1412.70764  | 707.3611   | 1412.70239 | 707.35846  | 2          | 9  | 8.8501  | 7.86    |       |
| 33 | 41.31 | 43.51 | 73.9 CDCA7_FlexII | 99.0 HPLPGSDSQSR                 | Label: 13C(6)15N(4)(R) @ 11                                                                        | 0.00244427           | 1189.5741   | 595.7943   | 1189.57153 | 595.79303  | 2          | 8  | 10.0856 | 7.86    |       |
| 33 | 41.31 | 43.51 | 73.9 CDCA7_FlexII | 99.0 ILGSLDALMEEEEEEDKMYMLVR     | Label: 13C(6)15N(2)(K) @ 18; Label: 13C(6)15N(4)(R) @ 23                                           | 0.00801227           | 2726.323    | 909.7816   | 2726.31494 | 909.778931 | 3          | 18 | 19.1922 | 7.86    |       |
| 33 | 41.31 | 43.51 | 73.9 CDCA7_FlexII | 99.0 KTVDGYNMEDDLPR              | Label: 13C(6)15N(2)(K) @ 1; Label: 13C(6)15N(4)(R) @ 14                                            | misses K-T @ 1       | -0.00537209 | 1669.76831 | 835.8914   | 1669.77368 | 835.894104 | 2  | 21      | 16.3166 | 7.86  |
| 33 | 41.31 | 43.51 | 73.9 CDCA7_FlexII | 99.0 LISMETSSSDSDCSFASDNFANTR    | Propionamide(C) @ 14; Deamidated(N) @ 21; Label: 13C(6)15N(4)(R) @ 26                              | 0.0131531            | 2868.17139  | 1435.093   | 2868.15772 | 1435.08618 | 2          | 18 | 17.7099 | 7.86    |       |
| 33 | 41.31 | 43.51 | 73.9 CDCA7_FlexII | 99.0 LMSELESFPGSFR               | Label: 13C(6)15N(4)(R) @ 13                                                                        | -0.00045101          | 1508.72046  | 755.3675   | 1508.72093 | 755.367737 | 2          | 14 | 19.1623 | 7.86    |       |
| 33 | 41.31 | 43.51 | 73.9 CDCA7_FlexII | 99.0 NRYGEEVR                    | Label: 13C(6)15N(4)(R) @ 2; Label: 13C(6)15N(4)(R) @ 8                                             | misses R-Y @ 2       | 0.00841479  | 1041.51904 | 348.1803   | 1041.51062 | 348.17749  | 3  | 8       | 11.6197 | 7.86  |
| 33 | 41.31 | 43.51 | 73.9 CDCA7_FlexII | 99.0 SLGSTCHOCR                  | Propionamide(C) @ 6; Propionamide(C) @ 9; Label: 13C(6)15N(4)(R) @ 10                              | 5.43E-05             | 1242.54724  | 622.2809   | 1242.54724 | 622.280945 | 2          | 11 | 9.0183  | 7.86    |       |
| 33 | 41.31 | 43.51 | 73.9 CDCA7_FlexII | 99.0 SSVTLPHIRPVVEEITEELENVCSNSR | Label: 13C(6)15N(4)(R) @ 10; Propionamide(C) @ 24; Deamidated(N) @ 26; Label: 13C(6)15N(4)(R) @ 28 | -0.0103004           | 3271.60425  | 1091.542   | 3271.61455 | 1091       |            |    |         |         |       |

|    |       |       |      |               |      |                             |                                                                                          |                             |             |            |          |            |            |   |    |         |      |
|----|-------|-------|------|---------------|------|-----------------------------|------------------------------------------------------------------------------------------|-----------------------------|-------------|------------|----------|------------|------------|---|----|---------|------|
| 33 | 41.31 | 43.51 | 73.9 | CDCA7_FlexIII | 99.0 | DALLDPNWHCPPCR              | Propionamide(C)@10; Propionamide(C)@13; Label:13C(6)15N(4)(R)@14                         |                             | 0.00076936  | 1787.81189 | 894.9132 | 1787.81116 | 894.912842 | 2 | 15 | 17.7375 | 7.86 |
| 33 | 41.31 | 43.51 | 73.9 | CDCA7_FlexIII | 99.0 | GRHPLPGSDSQSR               | Label:13C(6)15N(4)(R)@2; Label:13C(6)15N(4)(R)@13                                        | missed R-H@2                | 0.00756717  | 1412.70996 | 471.9106 | 1412.70239 | 471.908051 | 3 | 11 | 8.7758  | 7.86 |
| 33 | 41.31 | 43.51 | 73.9 | CDCA7_FlexIII | 99.0 | GRHPLPGSDSQSR               | Label:13C(6)15N(4)(R)@2; Label:13C(6)15N(4)(R)@13                                        | missed R-H@2                | 0.00756717  | 1412.70996 | 471.9106 | 1412.70239 | 471.908051 | 3 | 11 | 9.0356  | 7.86 |
| 33 | 41.31 | 43.51 | 73.9 | CDCA7_FlexIII | 99.0 | GRHPLPGSDSQSR               | Label:13C(6)15N(4)(R)@2; Label:13C(6)15N(4)(R)@13                                        | missed R-H@2                | 0.00528211  | 1412.70764 | 707.3611 | 1412.70239 | 707.35846  | 2 | 7  | 8.5918  | 7.86 |
| 33 | 41.31 | 43.51 | 73.9 | CDCA7_FlexIII | 99.0 | GRHPLPGSDSQSR               | Label:13C(6)15N(4)(R)@2; Label:13C(6)15N(4)(R)@13                                        | missed R-H@2                | 0.00756717  | 1412.70996 | 471.9106 | 1412.70239 | 471.908051 | 3 | 10 | 8.5201  | 7.86 |
| 33 | 41.31 | 43.51 | 73.9 | CDCA7_FlexIII | 99.0 | HPLPGSDSQSR                 | Label:13C(6)15N(4)(R)@11                                                                 |                             | -0.00439168 | 1189.56702 | 595.7908 | 1189.57153 | 595.79303  | 2 | 8  | 9.3111  | 7.86 |
| 33 | 41.31 | 43.51 | 73.9 | CDCA7_FlexIII | 99.0 | HPLPGSDSQSR                 | Label:13C(6)15N(4)(R)@11                                                                 |                             | 0.0014677   | 1189.57312 | 595.7938 | 1189.57153 | 595.79303  | 2 | 9  | 9.5666  | 7.86 |
| 33 | 41.31 | 43.51 | 73.9 | CDCA7_FlexIII | 99.0 | HPLPGSDSQSR                 | Label:13C(6)15N(4)(R)@11                                                                 |                             | -0.00210662 | 1189.56934 | 397.5304 | 1189.57153 | 397.531128 | 3 | 8  | 9.8713  | 7.86 |
| 33 | 41.31 | 43.51 | 73.9 | CDCA7_FlexIII | 99.0 | HPLPGSDSQSR                 | Label:13C(6)15N(4)(R)@11                                                                 |                             | -0.00439168 | 1189.56702 | 595.7908 | 1189.57153 | 595.79303  | 2 | 8  | 9.8292  | 7.86 |
| 33 | 41.31 | 43.51 | 73.9 | CDCA7_FlexIII | 99.0 | HPLPGSDSQSR                 | Label:13C(6)15N(4)(R)@11                                                                 |                             | -0.00439168 | 1189.56702 | 595.7908 | 1189.57153 | 595.79303  | 2 | 7  | 10.353  | 7.86 |
| 33 | 41.31 | 43.51 | 73.9 | CDCA7_FlexIII | 99.0 | ILGSLDALPMEEEEEDKMYLVR      | Label:13C(6)15N(2)(K)@18; Label:13C(6)15N(4)(R)@23                                       | missed K-Y@18               | 0.0080127   | 2726.323   | 909.7816 | 2726.31494 | 909.778931 | 3 | 10 | 26.5391 | 7.86 |
| 33 | 41.31 | 43.51 | 73.9 | CDCA7_FlexIII | 99.0 | KTVDGVMNEDDLPR              | Label:13C(6)15N(2)(K)@1; Label:13C(6)15N(4)(R)@14                                        | missed K-T@1                | 0.00677017  | 1669.78064 | 557.6008 | 1669.77368 | 557.598511 | 3 | 15 | 16.306  | 7.86 |
| 33 | 41.31 | 43.51 | 73.9 | CDCA7_FlexIII | 99.0 | LISMETSSSSDDSCDSFASDNFANTR  | Propionamide(C)@14; Deamidated(N)@21; Label:13C(6)15N(4)(R)@26                           |                             | 0.0354882   | 2868.19336 | 957.0717 | 2868.15772 | 957.059876 | 3 | 14 | 17.7166 | 7.86 |
| 33 | 41.31 | 43.51 | 73.9 | CDCA7_FlexIII | 99.0 | LMSELESFPGSFR               | Label:13C(6)15N(4)(R)@13                                                                 |                             | 0.00699529  | 1508.72791 | 755.3712 | 1508.72083 | 755.367737 | 2 | 14 | 18.8823 | 7.86 |
| 33 | 41.31 | 43.51 | 73.9 | CDCA7_FlexIII | 99.0 | NRYGEEVR                    | Label:13C(6)15N(4)(R)@2; Label:13C(6)15N(4)(R)@8                                         | missed R-Y@2                | 0.00841479  | 1041.51904 | 348.1803 | 1041.51062 | 348.17749  | 3 | 8  | 11.3417 | 7.86 |
| 33 | 41.31 | 43.51 | 73.9 | CDCA7_FlexIII | 99.0 | NRYGEEVR                    | Label:13C(6)15N(4)(R)@2; Label:13C(6)15N(4)(R)@8                                         | missed R-Y@2                | 0.00841479  | 1041.51904 | 348.1803 | 1041.51062 | 348.17749  | 3 | 7  | 11.8768 | 7.86 |
| 33 | 41.31 | 43.51 | 73.9 | CDCA7_FlexIII | 99.0 | SLGSTCHOCR                  | Propionamide(C)@6; Propionamide(C)@9; Label:13C(6)15N(4)(R)@10                           |                             | 0.00335025  | 1242.55066 | 622.2826 | 1242.54724 | 622.280945 | 2 | 11 | 9.5339  | 7.86 |
| 33 | 41.31 | 43.51 | 73.9 | CDCA7_FlexIII | 99.0 | SLGSTCHOCR                  | Propionamide(C)@6; Propionamide(C)@9; Label:13C(6)15N(4)(R)@10                           |                             | 5.43E-05    | 1242.54724 | 622.2809 | 1242.54724 | 622.280945 | 2 | 9  | 9.7998  | 7.86 |
| 33 | 41.31 | 43.51 | 73.9 | CDCA7_FlexIII | 99.0 | SLGSTCHOCR                  | Propionamide(C)@6; Propionamide(C)@9; Label:13C(6)15N(4)(R)@10                           |                             | 0.00176334  | 1242.54907 | 622.2818 | 1242.54724 | 622.280945 | 2 | 10 | 9.2788  | 7.86 |
| 33 | 41.31 | 43.51 | 73.9 | CDCA7_FlexIII | 99.0 | SLGSTCHOCR                  | Propionamide(C)@6; Deamidated(Q)@8; Propionamide(C)@9; Label:13C(6)15N(4)(R)@10          |                             | 0.00432225  | 1243.53565 | 622.7751 | 1243.53125 | 622.772949 | 2 | 7  | 11.6241 | 7.86 |
| 33 | 41.31 | 43.51 | 73.9 | CDCA7_FlexIII | 99.0 | SLGSTCHOCR                  | Propionamide(C)@6; Deamidated(Q)@8; Propionamide(C)@9; Label:13C(6)15N(4)(R)@10          |                             | -0.00397855 | 1243.52722 | 622.7709 | 1243.53125 | 622.772949 | 2 | 8  | 12.3331 | 7.86 |
| 33 | 41.31 | 43.51 | 73.9 | CDCA7_FlexIII | 99.0 | SSVTLPHIIRPVVEITEEELNVCSNSR | Label:13C(6)15N(4)(R)@10; Deamidated(N)@22; Propionamide(C)@24; Label:13C(6)15N(4)(R)@28 |                             | 0.0197289   | 3271.63428 | 1091.552 | 3271.6145  | 1091.54541 | 3 | 13 | 19.6808 | 7.86 |
| 33 | 41.31 | 43.51 | 73.9 | CDCA7_FlexIII | 99.0 | SSVTLPHIIRPVVEITEEELNVCSNSR | Label:13C(6)15N(4)(R)@10; Propionamide(C)@24; Label:13C(6)15N(4)(R)@28                   |                             | -0.00254816 | 3270.62769 | 818.6642 | 3270.63062 | 818.664917 | 4 | 12 | 19.6554 | 7.86 |
| 33 | 41.31 | 43.51 | 73.9 | CDCA7_FlexIII | 99.0 | SSVTLPHIIRPVVEITEEELNVCSNSR | Label:13C(6)15N(4)(R)@10; Propionamide(C)@24; Deamidated(N)@26; Label:13C(6)15N(4)(R)@28 |                             | 0.00171974  | 3271.61621 | 818.9113 | 3271.6145  | 818.910889 | 4 | 12 | 19.3929 | 7.86 |
| 33 | 41.31 | 43.51 | 73.9 | CDCA7_FlexIII | 99.0 | SSVTLPHIIRPVVEITEEELNVCSNSR | Label:13C(6)15N(4)(R)@10; Deamidated(N)@22; Propionamide(C)@24; Label:13C(6)15N(4)(R)@28 |                             | 0.0197289   | 3271.63428 | 1091.552 | 3271.6145  | 1091.54541 | 3 | 12 | 19.9632 | 7.86 |
| 33 | 41.31 | 43.51 | 73.9 | CDCA7_FlexIII | 99.0 | SSVTLPHIIRPVVEITEEELNVCSNSR | Label:13C(6)15N(4)(R)@10; Propionamide(C)@24; Label:13C(6)15N(4)(R)@28                   |                             | -0.0142669  | 3270.61621 | 818.6613 | 3270.63062 | 818.664917 | 4 | 11 | 19.9368 | 7.86 |
| 33 | 41.31 | 43.51 | 73.9 | CDCA7_FlexIII | 99.0 | SSVTLPHIIRPVVEITEEELNVCSNSR | Label:13C(6)15N(4)(R)@10; Deamidated(N)@22; Propionamide(C)@24; Label:13C(6)15N(4)(R)@28 |                             | 0.00171974  | 3271.61621 | 818.9113 | 3271.6145  | 818.910889 | 4 | 11 | 19.926  | 7.86 |
| 33 | 41.31 | 43.51 | 73.9 | CDCA7_FlexIII | 99.0 | TNCRNPDCWGVRR               | Propionamide(C)@3; Label:13C(6)15N(4)(R)@4; Propionamide(C)@8; Label:13C(6)15N(4)(R)@12  | missed R-N@4                | 0.00367227  | 1581.70813 | 791.8613 | 1581.70435 | 791.859436 | 2 | 13 | 15.652  | 7.86 |
| 33 | 41.31 | 43.51 | 73.9 | CDCA7_FlexIII | 99.0 | TVDGYMNNEDDLPR              | Oxidation(M)@6; Label:13C(6)15N(4)(R)@13                                                 |                             | -0.0113905  | 1549.64807 | 775.8313 | 1549.65942 | 775.836975 | 2 | 13 | 16.0039 | 7.86 |
| 33 | 41.31 | 43.51 | 73.9 | CDCA7_FlexIII | 99.0 | TVDGYMNNEDDLPR              | Label:13C(6)15N(4)(R)@13                                                                 |                             | 0.00350764  | 1533.66785 | 767.8412 | 1533.66455 | 767.839539 | 2 | 13 | 16.881  | 7.86 |
| 33 | 41.31 | 43.51 | 73.9 | CDCA7_FlexIII | 99.0 | TVDGYMNNEDDLPR              | Label:13C(6)15N(4)(R)@13                                                                 |                             | -0.00052069 | 1533.66382 | 767.8392 | 1533.66455 | 767.839539 | 2 | 14 | 17.1632 | 7.86 |
| 33 | 41.31 | 43.51 | 73.9 | CDCA7_FlexIII | 99.0 | VAMKFPAR                    | Oxidation(M)@3; Label:13C(6)15N(2)(K)@4; Label:13C(6)15N(4)(R)@8                         | missed K-F@4                | -0.00171125 | 952.526672 | 477.2706 | 952.52832  | 477.271454 | 2 | 9  | 13.8737 | 7.86 |
| 33 | 41.31 | 43.51 | 73.9 | CDCA7_FlexIII | 99.0 | YGEEVRDALLDPNWHCPPCR        | Label:13C(6)15N(4)(R)@6; Deamidated(N)@13; Propionamide(C)@16; Label:13C(6)15N(4)(R)@20  | missed R-D@6                | 0.0195319   | 2532.16235 | 845.0614 | 2532.14282 | 845.054932 | 3 | 11 | 17.8271 | 7.86 |
| 33 | 41.31 | 43.51 | 73.9 | CDCA7_FlexIII | 99.0 | YPTFLYK                     | Label:13C(6)15N(2)(K)@7                                                                  | cleaved A-Y@N-term          | -0.00165037 | 938.497681 | 470.2561 | 938.499329 | 470.256928 | 2 | 9  | 18.0092 | 7.86 |
| 33 | 41.31 | 43.51 | 73.9 | CDCA7_FlexIII | 99.0 | YPTFLYK                     | Label:13C(6)15N(2)(K)@7                                                                  | cleaved A-Y@N-term          | 0.00020099  | 938.499451 | 470.257  | 938.499329 | 470.256928 | 2 | 9  | 17.9008 | 7.86 |
| 33 | 41.31 | 43.51 | 73.9 | CDCA7_FlexIII | 99.0 | YPTFLYK                     | Label:13C(6)15N(2)(K)@7                                                                  | cleaved A-Y@N-term          | -0.00091407 | 938.498474 | 470.2565 | 938.499329 | 470.256928 | 2 | 9  | 17.7612 | 7.86 |
| 34 | 40.84 | 42.89 | 51.0 | PITX2_FlexIII | 99.0 | DKSQGKNEVDGAEDPSK           | Label:13C(6)15N(2)(K)@2; Label:13C(6)15N(2)(K)@7; Label:13C(6)15N(2)(K)@18               | missed K-S@2; missed K-N@7  | 0.00251247  | 1954.93176 | 652.6512 | 1954.92944 | 652.650391 | 3 | 19 | 8.7529  | 6.02 |
| 34 | 40.84 | 42.89 | 51.0 | PITX2_FlexIII | 99.0 | DTCSNSSLASLR                | Propionamide(C)@3; Label:13C(6)15N(4)(R)@11                                              |                             | -0.00110516 | 1246.58411 | 624.2993 | 1246.58508 | 624.299866 | 2 | 12 | 16.095  | 6.02 |
| 34 | 40.84 | 42.89 | 51.0 | PITX2_FlexIII | 99.0 | EEIAVWNTLTEAR               |                                                                                          |                             | 0.00205119  | 1530.7699  | 766.3922 | 1530.76782 | 766.391174 | 2 | 15 | 18.8992 | 6.02 |
| 34 | 40.84 | 42.89 | 51.0 | PITX2_FlexIII | 99.0 | ERNOQAELCK                  | Label:13C(6)15N(4)(R)@2; Propionamide(C)@9; Label:13C(6)15N(2)(K)@10                     | missed R-N@2                | -0.0110158  | 1306.63086 | 436.5509 | 1306.64185 | 436.554565 | 3 | 9  | 10.5404 | 6.02 |
| 34 | 40.84 | 42.89 | 51.0 | PITX2_FlexIII | 99.0 | GLTSASLSTK                  | Label:13C(6)15N(2)(K)@10                                                                 |                             | 0.00012551  | 971.538086 | 486.7763 | 971.537903 | 486.776215 | 2 | 11 | 15.1917 | 6.02 |
| 34 | 40.84 | 42.89 | 51.0 | PITX2_FlexIII | 99.0 | HRLEVHTISDTSSPEAAEK         | Label:13C(6)15N(4)(R)@2; Label:13C(6)15N(2)(K)@19                                        | missed R-L@2                | 0.0113704   | 2124.06836 | 709.03   | 2124.05664 | 709.026123 | 3 | 14 | 14.6237 | 6.02 |
| 34 | 40.84 | 42.89 | 51.0 | PITX2_FlexIII | 99.0 | HRLEVHTISDTSSPEAAEKDK       | Label:13C(6)15N(4)(R)@2; Label:13C(6)15N(2)(K)@19; Label:13C(6)15N(2)(K)@21              | missed R-L@2; missed K-D@19 | -0.0173179  | 2375.17529 | 594.8011 | 2375.19263 | 594.805481 | 4 | 17 | 14.4811 | 6.02 |
| 34 | 40.84 | 42.89 | 51.0 | PITX2_FlexIII | 99.0 | LEVHTISDTSSPEAAEK           | Label:13C(6)15N(2)(K)@17                                                                 |                             | 0.00323426  | 1820.8916  | 607.9711 | 1820.88831 | 607.970032 | 3 | 19 | 15.3922 | 6.02 |
| 34 | 40.84 | 42.89 | 51.0 | PITX2_FlexIII | 99.0 | LEVHTISDTSSPEAAEKDK         | Label:13C(6)15N(2)(K)@17; Label:13C(6)15N(2)(K)@19                                       | missed K-D@17               | -0.00940175 | 2072.01489 | 519.011  | 2072.02441 | 519.013367 | 4 | 19 | 14.9482 | 6.02 |
| 34 | 40.84 | 42.89 | 51.0 | PITX2_FlexIII | 99.0 | LSAVSSSSCHHPQPLAMASVLAPGQPR | Propionamide(C)@9; Label:13C(6)15N(4)(R)@27                                              |                             | -0.00139081 | 2808.40234 | 937.1414 | 2808.40381 | 937.141907 | 3 | 22 | 17.7807 | 6.02 |
| 34 | 40.84 | 42.89 | 51.0 | PITX2_FlexIII | 99.0 | NEDVGAEDPSK                 |                                                                                          |                             | 0.00436922  | 1159.50366 | 580.7591 | 1159.49927 | 580.756958 | 2 | 10 | 11.36   | 6.02 |
| 34 | 40.84 | 42.89 | 51.0 | PITX2_FlexIII | 99.0 | NEDVGAEDPSKK                | Label:13C(6)15N(2)(K)@11; Label:13C(6)15N(2)(K)@12                                       | missed K-K@11               | 0.00220795  | 1303.62488 | 435.5489 | 1303.62268 | 435.548157 | 3 | 9  | 9.0951  | 6.02 |
| 34 | 40.84 | 42.89 | 51.0 | PITX2_FlexIII | 99.0 | NQQAELCK                    | Propionamide(C)@7; Label:13C(6)15N(2)(K)@8                                               |                             | -0.00241552 | 1011.48749 | 506.751  | 1011.48987 | 506.752288 | 2 | 10 | 12.8724 | 6.02 |
| 34 | 40.84 | 42.89 | 51.0 | PITX2_FlexIII | 99.0 | NRYPDMSTR                   | Label:13C(6)15N(4)(R)@2; Label:13C(6)15N(4)(R)@9                                         | missed R-Y@2                | 0.0004265   | 1158.53589 | 580.2752 | 1158.53552 | 580.275024 | 2 | 13 | 14.2125 | 6.02 |
| 34 | 40.84 | 42.89 | 51.0 | PITX2_FlexIII | 99.0 | NRYPDMSTRREEIAVWNTLTEAR     | Label:13C(6)15N(4)(R)@2; Label:13C(6)15N(4)(R)@9; Label:13C(6)15N(4)(R)@22               | missed R-Y@2; missed R-E@9  | -0.00060984 | 2681.30054 | 671.3324 | 2681.30103 | 671.33252  | 4 | 13 | 18.9185 | 6.02 |
| 34 | 40.84 | 42.89 | 51.0 | PITX2_FlexIII | 99.0 | QRTHTSQQLQLELATFOR          | Label:13C(6)15N(4)(R)@2; Deamidated(Q)@11; Label:13C(6)15N(4)(R)@19                      | missed R-T@2                | 0.0079454   | 2368.17529 | 593.0511 | 2368.16748 | 593.049133 | 4 | 13 | 18.1682 | 6.02 |
| 34 | 40.84 | 42.89 | 51.0 | PITX2_FlexIII | 99.0 | SQQGKNEVDGAEDPSK            | Label:13C(6)15N(2)(K)@5; Label:13C(6)15N(2)(K)@16                                        | missed K-N@5                | -0.00474901 | 1703.7887  | 852.9016 | 1703.79334 | 852.903931 | 2 | 26 | 9.4509  | 6.02 |
| 34 | 40.84 | 42.89 | 51.0 | PITX2_FlexIII | 99.0 | SQQGKNEVDGAEDPSKK           | Label:13C(6)15N(2)(K)@5; Label:13C(6)15N(2)(K)@16; Label:13C(6)15N(2)(K)@17              | missed K-N@5; missed K-K@16 | -0.00779164 | 1839.8949  | 460.981  | 1839.90247 | 460.98291  | 4 | 13 | 8.0974  | 6.02 |
| 34 | 40.84 | 42.89 | 51.0 | PITX2_FlexIII | 99.0 | THFTSQQLQLELATFOR           |                                                                                          |                             | -0.0132382  | 2063.00586 | 688.6759 | 2063.007   |            |   |    |         |      |

|    |       |       |      |               |      |                              |                                                                                                    |                               |             |            |            |            |            |    |         |         |       |
|----|-------|-------|------|---------------|------|------------------------------|----------------------------------------------------------------------------------------------------|-------------------------------|-------------|------------|------------|------------|------------|----|---------|---------|-------|
| 34 | 40.84 | 42.89 | 51.0 | PITX2_FlexIII | 99.0 | LSAIVSSSSCHHPOPLAMASVLPAGQPR | Propionamide(C) @9; Deamidated(Q) @13; Label:13C(6)15N(4)(R) @27                                   | 0.0222474                     | 2809.40942  | 1405.712   | 2809.38794 | 1405.70117 | 2          | 15 | 17.6816 | 6.02    |       |
| 34 | 40.84 | 42.89 | 51.0 | PITX2_FlexIII | 99.0 | LSAIVSSSSCHHPOPLAMASVLPAGQPR | Propionamide(C) @9; Label:13C(6)15N(4)(R) @27                                                      | -0.00049818                   | 2808.40332  | 703.1081   | 2808.40381 | 703.108215 | 4          | 13 | 17.7569 | 6.02    |       |
| 34 | 40.84 | 42.89 | 51.0 | PITX2_FlexIII | 99.0 | NEDVGAEDPSK                  | Label:13C(6)15N(2)(K) @11                                                                          | 0.00238954                    | 1167.51587  | 584.7652   | 1167.51355 | 584.764038 | 2          | 14 | 11.3448 | 6.02    |       |
| 34 | 40.84 | 42.89 | 51.0 | PITX2_FlexIII | 99.0 | NEDVGAEDPSK                  | Label:13C(6)15N(2)(K) @11                                                                          | 0.0021454                     | 1167.51563  | 584.7651   | 1167.51355 | 584.764038 | 2          | 13 | 11.601  | 6.02    |       |
| 34 | 40.84 | 42.89 | 51.0 | PITX2_FlexIII | 99.0 | NEDVGAEDPSK                  | Label:13C(6)15N(2)(K) @11                                                                          | 0.00263368                    | 1167.51611  | 584.7653   | 1167.51355 | 584.764038 | 2          | 12 | 11.8559 | 6.02    |       |
| 34 | 40.84 | 42.89 | 51.0 | PITX2_FlexIII | 99.0 | NEDVGAEDPSK                  | Label:13C(6)15N(2)(K) @11                                                                          | 0.00080262                    | 1167.51428  | 584.7644   | 1167.51355 | 584.764038 | 2          | 11 | 12.1248 | 6.02    |       |
| 34 | 40.84 | 42.89 | 51.0 | PITX2_FlexIII | 99.0 | NEDVGAEDPSK                  | Label:13C(6)15N(2)(K) @11                                                                          | -0.00578918                   | 1167.50769  | 584.7611   | 1167.51355 | 584.764038 | 2          | 9  | 12.3936 | 6.02    |       |
| 34 | 40.84 | 42.89 | 51.0 | PITX2_FlexIII | 99.0 | NEDVGAEDPSK                  | Label:13C(6)15N(2)(K) @11                                                                          | 0.00202333                    | 1167.5155   | 584.765    | 1167.51355 | 584.764038 | 2          | 10 | 11.0815 | 6.02    |       |
| 34 | 40.84 | 42.89 | 51.0 | PITX2_FlexIII | 99.0 | NEDVGAEDPSKK                 | Label:13C(6)15N(2)(K) @11; Label:13C(6)15N(2)(K) @12                                               | 0.00367279                    | 1303.62634  | 435.5494   | 1303.62268 | 435.548157 | 3          | 8  | 8.8242  | 6.02    |       |
| 34 | 40.84 | 42.89 | 51.0 | PITX2_FlexIII | 99.0 | NRYPDMSTR                    | Label:13C(6)15N(4)(R) @2; Label:13C(6)15N(4)(R) @9                                                 | -0.0148552                    | 1158.52051  | 387.1808   | 1158.53552 | 387.185761 | 3          | 11 | 14.1472 | 6.02    |       |
| 34 | 40.84 | 42.89 | 51.0 | PITX2_FlexIII | 99.0 | NRYPDMSTR                    | Label:13C(6)15N(4)(R) @2; Label:13C(6)15N(4)(R) @9                                                 | -0.00038986                   | 1158.53503  | 387.1856   | 1158.53552 | 387.185761 | 3          | 11 | 14.4173 | 6.02    |       |
| 34 | 40.84 | 42.89 | 51.0 | PITX2_FlexIII | 99.0 | NRYPDMSTRREEIAVWNTLTEAR      | Label:13C(6)15N(4)(R) @2; Label:13C(6)15N(4)(R) @9; Label:13C(6)15N(4)(R) @22                      | misses R-Y @2; missed R-E @9  | -0.00500438 | 2681.29614 | 671.3313   | 2681.30103 | 671.33252  | 4  | 12      | 19.2005 | 6.02  |
| 34 | 40.84 | 42.89 | 51.0 | PITX2_FlexIII | 99.0 | NRYPDMSTRREEIAVWNTLTEAR      | Label:13C(6)15N(4)(R) @2; Label:13C(6)15N(4)(R) @9; Label:13C(6)15N(4)(R) @22                      | misses R-Y @2; missed R-E @9  | -0.00500438 | 2681.29614 | 671.3313   | 2681.30103 | 671.33252  | 4  | 10      | 26.595  | 6.02  |
| 34 | 40.84 | 42.89 | 51.0 | PITX2_FlexIII | 99.0 | QRTHTFSQQLQEATFOR            | Label:13C(6)15N(4)(R) @2; Deamidated(Q) @9; Label:13C(6)15N(4)(R) @19                              | misses R-T @2                 | 0.0151094   | 2368.18262 | 790.4015   | 2368.16748 | 790.396423 | 3  | 16      | 18.1449 | 6.02  |
| 34 | 40.84 | 42.89 | 51.0 | PITX2_FlexIII | 99.0 | SQGGKNEVDGAEDPSK             | Label:13C(6)15N(2)(K) @5; Label:13C(6)15N(2)(K) @16                                                | misses K-N @5                 | 0.00816756  | 1703.80151 | 568.9411   | 1703.79334 | 568.938355 | 3  | 10      | 9.0798  | 6.02  |
| 34 | 40.84 | 42.89 | 51.0 | PITX2_FlexIII | 99.0 | SQGGKNEVDGAEDPSK             | Label:13C(6)15N(2)(K) @5; Label:13C(6)15N(2)(K) @16                                                | misses K-N @5                 | 0.00816756  | 1703.80151 | 568.9411   | 1703.79334 | 568.938355 | 3  | 18      | 9.3478  | 6.02  |
| 34 | 40.84 | 42.89 | 51.0 | PITX2_FlexIII | 99.0 | SQGGKNEVDGAEDPSK             | Label:13C(6)15N(2)(K) @5; Label:13C(6)15N(2)(K) @16                                                | misses K-N @5                 | 0.00340681  | 1703.79675 | 568.9395   | 1703.79334 | 568.938355 | 3  | 19      | 9.6093  | 6.02  |
| 34 | 40.84 | 42.89 | 51.0 | PITX2_FlexIII | 99.0 | SQGGKNEVDGAEDPSK             | Label:13C(6)15N(2)(K) @5; Label:13C(6)15N(2)(K) @16                                                | misses K-N @5                 | -0.00474901 | 1703.7887  | 852.9016   | 1703.79334 | 852.903931 | 2  | 11      | 9.7196  | 6.02  |
| 34 | 40.84 | 42.89 | 51.0 | PITX2_FlexIII | 99.0 | SQGGKNEVDGAEDPSK             | Label:13C(6)15N(2)(K) @5; Label:13C(6)15N(2)(K) @16                                                | misses K-N @5                 | 0.00816756  | 1703.80151 | 568.9411   | 1703.79334 | 568.938355 | 3  | 15      | 9.8779  | 6.02  |
| 34 | 40.84 | 42.89 | 51.0 | PITX2_FlexIII | 99.0 | SQGGKNEVDGAEDPSK             | Label:13C(6)15N(2)(K) @5; Deamidated(N) @6; Label:13C(6)15N(2)(K) @16                              | misses K-N @5                 | 0.0142048   | 1704.7915  | 569.2711   | 1704.77734 | 569.266419 | 3  | 15      | 10.1389 | 6.02  |
| 34 | 40.84 | 42.89 | 51.0 | PITX2_FlexIII | 99.0 | SQGGKNEVDGAEDPSK             | Label:13C(6)15N(2)(K) @5; Deamidated(N) @6; Label:13C(6)15N(2)(K) @16                              | misses K-N @5                 | 0.0142048   | 1704.7915  | 569.2711   | 1704.77734 | 569.266419 | 3  | 11      | 10.4151 | 6.02  |
| 34 | 40.84 | 42.89 | 51.0 | PITX2_FlexIII | 99.0 | SQGGKNEVDGAEDPSK             | Deamidated(Q) @3; Label:13C(6)15N(2)(K) @5; Label:13C(6)15N(2)(K) @16                              | misses K-N @5                 | 0.0112369   | 1704.7887  | 853.4016   | 1704.77734 | 853.395935 | 2  | 7       | 9.1844  | 6.02  |
| 34 | 40.84 | 42.89 | 51.0 | PITX2_FlexIII | 99.0 | SQGGKNEVDGAEDPSKK            | Label:13C(6)15N(2)(K) @5; Label:13C(6)15N(2)(K) @16; Label:13C(6)15N(2)(K) @17                     | misses K-N @5; missed K-K @16 | 0.00919905  | 1839.91187 | 614.3112   | 1839.90247 | 614.308106 | 3  | 14      | 7.8107  | 6.02  |
| 34 | 40.84 | 42.89 | 51.0 | PITX2_FlexIII | 99.0 | SQGGKNEVDGAEDPSKK            | Label:13C(6)15N(2)(K) @5; Label:13C(6)15N(2)(K) @16; Label:13C(6)15N(2)(K) @17                     | -0.00779164                   | 1839.8949   | 460.981    | 1839.90247 | 460.98291  | 4          | 14 | 7.8281  | 6.02    |       |
| 34 | 40.84 | 42.89 | 51.0 | PITX2_FlexIII | 99.0 | SQGGKNEVDGAEDPSKK            | Label:13C(6)15N(2)(K) @5; Label:13C(6)15N(2)(K) @16; Label:13C(6)15N(2)(K) @17                     | misses K-N @5; missed K-K @16 | 0.00919905  | 1839.91187 | 614.3112   | 1839.90247 | 614.308106 | 3  | 19      | 8.0756  | 6.02  |
| 34 | 40.84 | 42.89 | 51.0 | PITX2_FlexIII | 99.0 | SQGGKNEVDGAEDPSKK            | Label:13C(6)15N(2)(K) @5; Deamidated(N) @6; Label:13C(6)15N(2)(K) @16; Label:13C(6)15N(2)(K) @17   | misses K-N @5; missed K-K @16 | 0.0152363   | 1840.90173 | 614.6412   | 1840.88648 | 614.636108 | 3  | 11      | 8.3371  | 6.02  |
| 34 | 40.84 | 42.89 | 51.0 | PITX2_FlexIII | 99.0 | THFTSQQLQEATFOR              | Deamidated(Q) @9; Label:13C(6)15N(4)(R) @17                                                        | 0.00262436                    | 2074.0022   | 692.3413   | 2073.99951 | 692.340454 | 3          | 16 | 18.5049 | 6.02    |       |
| 34 | 40.84 | 42.89 | 51.0 | PITX2_FlexIII | 99.0 | THFTSQQLQEATFOR              | Label:13C(6)15N(4)(R) @17                                                                          | -0.00638068                   | 2073.00928  | 1037.512   | 2073.01538 | 1037.51502 | 2          | 26 | 18.531  | 6.02    |       |
| 34 | 40.84 | 42.89 | 51.0 | PITX2_FlexIII | 99.0 | THFTSQQLQEATFOR              | Label:13C(6)15N(4)(R) @17                                                                          | -0.00011694                   | 2073.01538  | 692.0124   | 2073.01538 | 692.012451 | 3          | 19 | 18.7788 | 6.02    |       |
| 34 | 40.84 | 42.89 | 51.0 | PITX2_FlexIII | 99.0 | THFTSQQLQEATFOR              | Label:13C(6)15N(4)(R) @17                                                                          | -0.0029627                    | 2073.01343  | 1037.514   | 2073.01538 | 1037.51502 | 2          | 23 | 18.8051 | 6.02    |       |
| 34 | 40.84 | 42.89 | 51.0 | PITX2_FlexIII | 99.0 | THFTSQQLQEATFOR              | Deamidated(Q) @9; Label:13C(6)15N(4)(R) @17                                                        | 0.00262436                    | 2074.0022   | 692.3413   | 2073.99951 | 692.340454 | 3          | 15 | 19.0342 | 6.02    |       |
| 34 | 40.84 | 42.89 | 51.0 | PITX2_FlexIII | 99.0 | THFTSQQLQEATFOR              | Deamidated(Q) @9; Label:13C(6)15N(4)(R) @17                                                        | 0.0324706                     | 2074.03223  | 692.3513   | 2073.99951 | 692.340454 | 3          | 15 | 19.3788 | 6.02    |       |
| 34 | 40.84 | 42.89 | 51.0 | PITX2_FlexIII | 99.0 | THFTSQQLQEATFOR              | Label:13C(6)15N(4)(R) @17                                                                          | -0.00011694                   | 2073.01538  | 692.0124   | 2073.01538 | 692.012451 | 3          | 19 | 19.7871 | 6.02    |       |
| 34 | 40.84 | 42.89 | 51.0 | PITX2_FlexIII | 99.0 | THFTSQQLQEATFOR              | Deamidated(Q) @9; Label:13C(6)15N(4)(R) @17                                                        | 0.0324706                     | 2074.03223  | 692.3513   | 2073.99951 | 692.340454 | 3          | 14 | 21.4205 | 6.02    |       |
| 34 | 40.84 | 42.89 | 51.0 | PITX2_FlexIII | 99.0 | THFTSQQLQEATFOR              | Label:13C(6)15N(4)(R) @17                                                                          | -0.00341285                   | 2073.01196  | 692.0113   | 2073.01538 | 692.012451 | 3          | 14 | 21.4242 | 6.02    |       |
| 34 | 40.84 | 42.89 | 51.0 | PITX2_FlexIII | 99.0 | THFTSQQLQEATFOR              | Label:13C(6)15N(4)(R) @17                                                                          | 0.00648903                    | 2073.02417  | 692.0153   | 2073.01538 | 692.012451 | 3          | 16 | 26.5468 | 6.02    |       |
| 34 | 40.84 | 42.89 | 51.0 | PITX2_FlexIII | 99.0 | THFTSQQLQEATFOR              | Label:13C(6)15N(4)(R) @17                                                                          | -0.00341285                   | 2073.01196  | 692.0113   | 2073.01538 | 692.012451 | 3          | 10 | 26.8047 | 6.02    |       |
| 34 | 40.84 | 42.89 | 51.0 | PITX2_FlexIII | 99.0 | THFTSQQLQEATFOR              | Deamidated(Q) @9; Label:13C(6)15N(4)(R) @17                                                        | 0.0324706                     | 2074.03223  | 692.3513   | 2073.99951 | 692.340454 | 3          | 11 | 21.1453 | 6.02    |       |
| 34 | 40.84 | 42.89 | 51.0 | PITX2_FlexIII | 99.0 | THFTSQQLQEATFOR              | Deamidated(Q) @9; Label:13C(6)15N(4)(R) @17                                                        | 0.00262436                    | 2074.0022   | 692.3413   | 2073.99951 | 692.340454 | 3          | 10 | 20.8801 | 6.02    |       |
| 34 | 40.84 | 42.89 | 51.0 | PITX2_FlexIII | 99.0 | YPTFLYK                      | Label:13C(6)15N(2)(K) @7                                                                           | -0.00165037                   | 938.497681  | 470.2561   | 938.499329 | 470.256928 | 2          | 9  | 18.0092 | 6.02    |       |
| 34 | 40.84 | 42.89 | 51.0 | PITX2_FlexIII | 99.0 | YPTFLYK                      | Label:13C(6)15N(2)(K) @7                                                                           | 0.00020099                    | 938.499451  | 470.257    | 938.499329 | 470.256928 | 2          | 9  | 17.9008 | 6.02    |       |
| 34 | 40.84 | 42.89 | 51.0 | PITX2_FlexIII | 99.0 | YPTFLYK                      | Label:13C(6)15N(2)(K) @7                                                                           | -0.00091407                   | 938.498474  | 470.2565   | 938.499329 | 470.256928 | 2          | 9  | 17.7612 | 6.02    |       |
| 35 | 40.71 | 42.76 | 46.9 | SP100_FlexIII | 99.0 | AEPTESSCEQIAVQVNNDAGR        | Propionamide(C) @7; Deamidated(N) @16; Label:13C(6)15N(4)(R) @21                                   | -0.0012095                    | 2269.0144   | 757.3454   | 2269.01563 | 757.345825 | 3          | 18 | 16.0825 | 15.89   |       |
| 35 | 40.71 | 42.76 | 46.9 | SP100_FlexIII | 99.0 | DTTSDKDDSLGSGQQTNEQCAQK      | Label:13C(6)15N(2)(K) @6; Deamidated(N) @16; Propionamide(C) @19; Label:13C(6)15N(2)(K) @22        | 0.00909877                    | 2486.07764  | 829.6998   | 2486.0686  | 829.696777 | 3          | 17 | 13.7576 | 15.89   |       |
| 35 | 40.71 | 42.76 | 46.9 | SP100_FlexIII | 99.0 | EKPFNSKVECCQAAR              | Label:13C(6)15N(2)(K) @2; Label:13C(6)15N(2)(K) @8; Propionamide(C) @11; Label:13C(6)15N(4)(R) @16 | misses K-V @8                 | 0.0100736   | 1917.9679  | 640.3299   | 1917.95776 | 640.326538 | 3  | 12      | 13.9396 | 15.89 |
| 35 | 40.71 | 42.76 | 46.9 | SP100_FlexIII | 99.0 | KDTTSDKDDSLGSGQQTNEQCAQK     | Label:13C(6)15N(2)(K) @1; Label:13C(6)15N(2)(K) @7; Propionamide(C) @20; Label:13C(6)15N(2)(K) @23 | misses K-D @1; missed K-D @7  | 0.00386162  | 2621.19751 | 874.7398   | 2621.1936  | 874.738525 | 3  | 14      | 12.9097 | 15.89 |
| 35 | 40.71 | 42.76 | 46.9 | SP100_FlexIII | 99.0 | KTFPFLGLR                    | Label:13C(6)15N(2)(K) @1; Label:13C(6)15N(4)(R) @10                                                | misses K-T @1                 | 0.00657503  | 1224.70532 | 613.3599   | 1224.69861 | 613.356567 | 2  | 10      | 18.7058 | 15.89 |
| 35 | 40.71 | 42.76 | 46.9 | SP100_FlexIII | 99.0 | LLYDIVFK                     | Label:13C(6)15N(2)(K) @8                                                                           | -0.0059389                    | 1017.59845  | 509.8065   | 1017.599   | 509.806793 | 2          | 9  | 14.9793 | 15.89   |       |
| 35 | 40.71 | 42.76 | 46.9 | SP100_FlexIII | 99.0 | LNCEISPVANEMNHLPASHDLQR      | Propionamide(C) @4; Label:13C(6)15N(4)(R) @24                                                      | -0.00256664                   | 2805.3291   | 562.0731   | 2805.33154 | 562.073547 | 5          | 13 | 16.5565 | 15.89   |       |
| 35 | 40.71 | 42.76 | 46.9 | SP100_FlexIII | 99.0 | MFEDSQDSCR                   | Propionamide(C) @9; Label:13C(6)15N(4)(R) @10                                                      | -0.00104578                   | 1297.49329  | 649.7539   | 1297.49426 | 649.754395 | 2          | 13 | 14.538  | 15.89   |       |
| 35 | 40.71 | 42.76 | 46.9 | SP100_FlexIII | 99.0 | MFTEDQGVDDR                  | Label:13C(6)15N(4)(R) @11                                                                          | -1.85E-05                     | 1321.54846  | 661.7815   | 1321.54834 | 661.781494 | 2          | 13 | 15.3954 | 15.89   |       |
| 35 | 40.71 | 42.76 | 46.9 | SP100_FlexIII | 99.0 | MFTEDQGVDDRLLYDIVFK          | Label:13C(6)15N(4)(R) @11; Label:13C(6)15N(2)(K) @19                                               | -0.0119953                    | 2321.12524  | 1161.57    | 2321.13696 | 1161.57568 | 2          | 15 | 20.2636 | 15.89   |       |
| 35 | 40.71 | 42.76 | 46.9 | SP100_FlexIII | 99.0 | NKVEISNAIK                   | Label:13C(6)15N(2)(K) @2; Label:13C(6)15N(2)(K) @10                                                | misses K-V @2                 | 1.89E-05    | 1130.66309 | 566.3388   | 1130.66226 | 566.338806 | 2  | 15      | 14.9255 | 15.89 |
| 35 | 40.71 | 42.76 | 46.9 | SP100_FlexIII | 99.0 | NKVEISNAIKK                  | Label:13C(6)15N(2)(K) @2; Label:13C(6)15N(2)(K) @10; Label:13C(6)15N(2)(K) @11                     | misses K-V @2; missed K-K @10 | -0.0142998  | 1266.75781 | 423.2599   | 1266.77222 | 423.264679 | 3  | 15      | 13.9539 | 15.89 |
| 35 | 40.71 | 42.76 | 46.9 | SP100_FlexIII | 99.0 | RLNECISPVANEMNHLPASHDLQR     | Label:13C(6)15N(4)(R) @1; Propionamide(C) @5; Label:13C(6)15N(4)(R) @25                            | misses R-L @1                 | -0.0054097  | 2971.43555 | 595.2944   | 2971.44092 | 595.29541  | 5  | 16      | 16.4472 | 15.89 |

|    |       |       |                     |                                       |                                                                                                            |                                 |             |            |           |            |             |   |    |         |       |
|----|-------|-------|---------------------|---------------------------------------|------------------------------------------------------------------------------------------------------------|---------------------------------|-------------|------------|-----------|------------|-------------|---|----|---------|-------|
| 35 | 40.71 | 42.76 | 46.9 SP100_FlexIII  | 99.0 NKVEISNAIKK                      | Label: 13C(6)15N(2)(K) @ 2; Deamidated(N) @ 7; Label: 13C(6)15N(2)(K) @ 10; Label: 13C(6)15N(2)(K) @ 11    | missed K-V @ 2; missed K-K @ 10 | -0.00295427 | 1267.7533  | 423.5917  | 1267.75623 | 423.592682  | 3 | 12 | 14.4831 | 15.89 |
| 35 | 40.71 | 42.76 | 46.9 SP100_FlexIII  | 99.0 RLNECISPVANEMNHLPAHSHDLQR        | Label: 13C(6)15N(4)(R) @ 1; Propionamide(C) @ 5; Deamidated(N) @ 14; Label: 13C(6)15N(4)(R) @ 25           | missed R-L @ 1                  | 0.00253864  | 2972.4502  | 744.1198  | 2972.42481 | 744.113464  | 4 | 14 | 15.9353 | 15.89 |
| 35 | 40.71 | 42.76 | 46.9 SP100_FlexIII  | 99.0 RLNECISPVANEMNHLPAHSHDLQR        | Label: 13C(6)15N(4)(R) @ 1; Propionamide(C) @ 5; Label: 13C(6)15N(4)(R) @ 25                               | missed R-L @ 1                  | 0.00220561  | 2971.46314 | 595.2999  | 2971.44092 | 595.29541   | 5 | 14 | 16.178  | 15.89 |
| 35 | 40.71 | 42.76 | 46.9 SP100_FlexIII  | 99.0 RLNECISPVANEMNHLPAHSHDLQR        | Label: 13C(6)15N(4)(R) @ 1; Propionamide(C) @ 5; Deamidated(N) @ 14; Label: 13C(6)15N(4)(R) @ 25           | missed R-L @ 1                  | 0.0127325   | 2972.43774 | 991.8198  | 2972.42481 | 991.815552  | 3 | 16 | 16.2434 | 15.89 |
| 35 | 40.71 | 42.76 | 46.9 SP100_FlexIII  | 99.0 RLNECISPVANEMNHLPAHSHDLQR        | Label: 13C(6)15N(4)(R) @ 1; Propionamide(C) @ 5; Deamidated(N) @ 11; Label: 13C(6)15N(4)(R) @ 25           | missed R-L @ 1                  | -0.0146526  | 2972.41016 | 744.1098  | 2972.42481 | 744.113464  | 4 | 18 | 16.4709 | 15.89 |
| 35 | 40.71 | 42.76 | 46.9 SP100_FlexIII  | 99.0 RVIGQDHDFSESSEEEAPAEASSGALR      | Label: 13C(6)15N(4)(R) @ 1; Label: 13C(6)15N(4)(R) @ 27                                                    | missed R-V @ 1                  | 0.00744781  | 2893.33008 | 724.3398  | 2893.323   | 724.338013  | 4 | 18 | 15.6331 | 15.89 |
| 35 | 40.71 | 42.76 | 46.9 SP100_FlexIII  | 99.0 THHNQASDIVIISSEGSTDDDEPLEVFISAPR | Deamidated(N) @ 4; Label: 13C(6)15N(4)(R) @ 35                                                             |                                 | 0.0260152   | 3804.81006 | 952.2098  | 3804.78418 | 952.203308  | 4 | 14 | 19.3509 | 15.89 |
| 35 | 40.71 | 42.76 | 46.9 SP100_FlexIII  | 99.0 VIGQDHDFSESSEEEAPAEASSGALR       | Deamidated(Q) @ 4; Label: 13C(6)15N(4)(R) @ 26                                                             |                                 | 0.00995907  | 2728.20752 | 910.4098  | 2728.19751 | 910.406433  | 3 | 11 | 16.0564 | 15.89 |
| 35 | 40.71 | 42.76 | 46.9 SP100_FlexIII  | 99.0 YPTFLYK                          | Label: 13C(6)15N(2)(K) @ 7                                                                                 | cleaved D-Y @ N-term            | -0.00165037 | 938.497681 | 470.2561  | 938.499329 | 470.256928  | 2 | 9  | 18.0092 | 15.89 |
| 35 | 40.71 | 42.76 | 46.9 SP100_FlexIII  | 99.0 YPTFLYK                          | Label: 13C(6)15N(2)(K) @ 7                                                                                 | cleaved D-Y @ N-term            | 0.00020099  | 938.499451 | 470.257   | 938.499329 | 470.256928  | 2 | 9  | 17.9008 | 15.89 |
| 35 | 40.71 | 42.76 | 46.9 SP100_FlexIII  | 99.0 YPTFLYK                          | Label: 13C(6)15N(2)(K) @ 7                                                                                 | cleaved D-Y @ N-term            | -0.00091407 | 938.498474 | 470.2565  | 938.499329 | 470.256928  | 2 | 9  | 17.7612 | 15.89 |
| 36 | 40.58 | 42.7  | 45.4 CSNK1D_FlexIII | 99.0 DVKPDNFLMGLGK                    | Label: 13C(6)15N(2)(K) @ 3; Label: 13C(6)15N(2)(K) @ 13                                                    |                                 | -0.00015004 | 1448.76672 | 483.9295  | 1448.76685 | 483.929565  | 3 | 15 | 18.6695 | 14.60 |
| 36 | 40.58 | 42.7  | 45.4 CSNK1D_FlexIII | 99.0 DVKPDNFLMGLGKK                   | Label: 13C(6)15N(2)(K) @ 3; Label: 13C(6)15N(2)(K) @ 13; Label: 13C(6)15N(2)(K) @ 14                       | missed K-K @ 13                 | -0.00397164 | 1584.87219 | 397.2253  | 1584.87598 | 397.226288  | 4 | 15 | 17.9598 | 14.60 |
| 36 | 40.58 | 42.7  | 45.4 CSNK1D_FlexIII | 99.0 GAPVNISSDLTGR                    | Label: 13C(6)15N(4)(R) @ 14                                                                                |                                 | -0.00132398 | 1382.70166 | 692.3581  | 1382.70288 | 692.358765  | 2 | 16 | 16.5848 | 14.60 |
| 36 | 40.58 | 42.7  | 45.4 CSNK1D_FlexIII | 99.0 GNLVYIDFGLAK                     | Label: 13C(6)15N(2)(K) @ 13                                                                                |                                 | -0.00208861 | 1429.80383 | 715.9092  | 1429.80603 | 715.910278  | 2 | 15 | 20.3773 | 14.60 |
| 36 | 40.58 | 42.7  | 45.4 CSNK1D_FlexIII | 99.0 GNLVYIDFGLAKK                    | Label: 13C(6)15N(2)(K) @ 13; Label: 13C(6)15N(2)(K) @ 14                                                   | missed K-K @ 13                 | 0.00159713  | 1565.91699 | 522.9796  | 1565.91516 | 522.979004  | 3 | 12 | 19.8314 | 14.60 |
| 36 | 40.58 | 42.7  | 45.4 CSNK1D_FlexIII | 99.0 GYPSEFATYLNFCR                   | Propionamide(C) @ 13; Label: 13C(6)15N(4)(R) @ 14                                                          |                                 | -0.00475603 | 1747.78565 | 874.9001  | 1747.79041 | 874.902466  | 2 | 14 | 19.4626 | 14.60 |
| 36 | 40.58 | 42.7  | 45.4 CSNK1D_FlexIII | 99.0 IGSGSFGDIYLTGDIAAGEEVAIKLECVK    | Label: 13C(6)15N(2)(K) @ 24; Propionamide(C) @ 27; Label: 13C(6)15N(2)(K) @ 29                             | missed K-L @ 24                 | -0.00132941 | 3041.55811 | 1014.86   | 3041.55603 | 1014.86066  | 3 | 18 | 20.3444 | 14.60 |
| 36 | 40.58 | 42.7  | 45.4 CSNK1D_FlexIII | 99.0 KGNLVYIDFGLAK                    | Label: 13C(6)15N(2)(K) @ 1; Label: 13C(6)15N(2)(K) @ 14                                                    | missed K-G @ 1;                 | -0.00986542 | 1565.90552 | 783.96    | 1565.91516 | 783.964905  | 2 | 24 | 19.6176 | 14.60 |
| 36 | 40.58 | 42.7  | 45.4 CSNK1D_FlexIII | 99.0 KGNLVYIDFGLAKK                   | Label: 13C(6)15N(2)(K) @ 1; Label: 13C(6)15N(2)(K) @ 14; Label: 13C(6)15N(2)(K) @ 15                       | missed K-G @ 1; missed K-K @ 14 | 0.00260939  | 1702.02698 | 568.3496  | 1702.02441 | 568.348755  | 3 | 16 | 18.9274 | 14.60 |
| 36 | 40.58 | 42.7  | 45.4 CSNK1D_FlexIII | 99.0 IGSGSFGDIYLTGDIAAGEEVAIKLECVK    | Label: 13C(6)15N(2)(K) @ 1; Label: 13C(6)15N(2)(K) @ 25; Propionamide(C) @ 28; Label: 13C(6)15N(2)(K) @ 30 | missed K-I @ 1; missed K-L @ 25 | 0.0212773   | 3177.69043 | 795.4299  | 3177.66943 | 795.424622  | 4 | 17 | 20.0553 | 14.60 |
| 36 | 40.58 | 42.7  | 45.4 CSNK1D_FlexIII | 99.0 KMSTPIEVLCK                      | Label: 13C(6)15N(2)(K) @ 1; Propionamide(C) @ 10; Label: 13C(6)15N(2)(K) @ 11                              | missed K-M @ 1                  | -0.00328112 | 1334.72412 | 668.3693  | 1334.7273  | 668.370911  | 2 | 17 | 17.098  | 14.60 |
| 36 | 40.58 | 42.7  | 45.4 CSNK1D_FlexIII | 99.0 MMQGVGVPITR                      | Label: 13C(6)15N(4)(R) @ 12                                                                                |                                 | -0.00056092 | 1268.66028 | 635.3374  | 1268.66089 | 635.337708  | 2 | 13 | 17.7203 | 14.60 |
| 36 | 40.58 | 42.7  | 45.4 CSNK1D_FlexIII | 99.0 MSTPIEVLCK                       | Propionamide(C) @ 9; Label: 13C(6)15N(2)(K) @ 10                                                           |                                 | -0.00075333 | 1198.61743 | 600.316   | 1198.61816 | 600.316345  | 2 | 11 | 17.956  | 14.60 |
| 36 | 40.58 | 42.7  | 45.4 CSNK1D_FlexIII | 99.0 MSTSQIPGR                        | Label: 13C(6)15N(4)(R) @ 9                                                                                 |                                 | -0.00172818 | 985.487244 | 493.7509  | 985.489014 | 493.751801  | 2 | 11 | 14.8608 | 14.60 |
| 36 | 40.58 | 42.7  | 45.4 CSNK1D_FlexIII | 99.0 THQHPIPYR                        | Label: 13C(6)15N(4)(R) @ 8                                                                                 |                                 | -0.00074086 | 1060.54346 | 531.279   | 1060.54419 | 531.279358  | 2 | 10 | 12.6848 | 14.60 |
| 36 | 40.58 | 42.7  | 45.4 CSNK1D_FlexIII | 99.0 THQHPIPYRENK                     | Label: 13C(6)15N(4)(R) @ 8; Label: 13C(6)15N(2)(K) @ 11                                                    | missed R-E @ 8                  | -0.0009395  | 1439.73779 | 480.9199  | 1439.73889 | 480.920227  | 3 | 11 | 9.1484  | 14.60 |
| 36 | 40.58 | 42.7  | 45.4 CSNK1D_FlexIII | 99.0 TKHPQLHIESK                      | Label: 13C(6)15N(2)(K) @ 2; Label: 13C(6)15N(2)(K) @ 11                                                    | missed K-H @ 2                  | -0.00349222 | 1332.74512 | 667.3798  | 1332.74854 | 667.381531  | 2 | 15 | 13.081  | 14.60 |
| 36 | 40.58 | 42.7  | 45.4 CSNK1D_FlexIII | 99.0 TVLLAADQMISR                     | Label: 13C(6)15N(4)(R) @ 12                                                                                |                                 | -0.00238128 | 1368.76502 | 685.3898  | 1368.76746 | 685.390991  | 2 | 12 | 19.406  | 14.60 |
| 36 | 40.58 | 42.7  | 45.4 CSNK1D_FlexIII | 99.0 VASSGLQSVVHR                     | Label: 13C(6)15N(4)(R) @ 12                                                                                |                                 | -0.00110485 | 1248.6803  | 625.3474  | 1248.6814  | 625.347961  | 2 | 17 | 15.4729 | 14.60 |
| 36 | 40.58 | 42.7  | 45.4 CSNK1D_FlexIII | 99.0 YASINTHLGIEQSR                   | Label: 13C(6)15N(4)(R) @ 14                                                                                |                                 | -0.00349397 | 1597.8053  | 799.9099  | 1597.80884 | 799.911682  | 2 | 19 | 16.3619 | 14.60 |
| 36 | 40.58 | 42.7  | 45.4 CSNK1D_FlexIII | 99.0 DVKPDNFLMGLGKK                   | Label: 13C(6)15N(2)(K) @ 3; Label: 13C(6)15N(2)(K) @ 13; Label: 13C(6)15N(2)(K) @ 14                       | missed K-K @ 13                 | -0.00115195 | 1584.87488 | 529.2989  | 1584.87598 | 529.299255  | 3 | 15 | 17.9335 | 14.60 |
| 36 | 40.58 | 42.7  | 45.4 CSNK1D_FlexIII | 99.0 KGNLVYIDFGLAK                    | Label: 13C(6)15N(2)(K) @ 1; Label: 13C(6)15N(2)(K) @ 14                                                    | missed K-G @ 1                  | 0.00159713  | 1565.91699 | 522.9796  | 1565.91516 | 522.979004  | 3 | 13 | 19.563  | 14.60 |
| 36 | 40.58 | 42.7  | 45.4 CSNK1D_FlexIII | 99.0 KMSTPIEVLCK                      | Label: 13C(6)15N(2)(K) @ 1; Propionamide(C) @ 10; Label: 13C(6)15N(2)(K) @ 11                              | missed K-M @ 1                  | -0.00332371 | 1334.72412 | 445.9153  | 1334.7273  | 445.916382  | 3 | 11 | 17.083  | 14.60 |
| 36 | 40.58 | 42.7  | 45.4 CSNK1D_FlexIII | 99.0 THQHPIPYR                        | Label: 13C(6)15N(4)(R) @ 8                                                                                 |                                 | 0.00047984  | 1060.54468 | 531.2796  | 1060.54419 | 531.279358  | 2 | 9  | 12.96   | 14.60 |
| 36 | 40.58 | 42.7  | 45.4 CSNK1D_FlexIII | 99.0 THQHPIPYR                        | Label: 13C(6)15N(4)(R) @ 8                                                                                 |                                 | -0.00227882 | 1060.54175 | 354.5212  | 1060.54419 | 354.522003  | 3 | 9  | 12.7741 | 14.60 |
| 36 | 40.58 | 42.7  | 45.4 CSNK1D_FlexIII | 99.0 THQHPIPYR                        | Label: 13C(6)15N(4)(R) @ 8                                                                                 |                                 | -0.00227882 | 1060.54175 | 354.5212  | 1060.54419 | 354.522003  | 3 | 9  | 12.5062 | 14.60 |
| 36 | 40.58 | 42.7  | 45.4 CSNK1D_FlexIII | 99.0 THQHPIPYRENK                     | Label: 13C(6)15N(4)(R) @ 8; Label: 13C(6)15N(2)(K) @ 11                                                    | missed R-E @ 8                  | -0.00158036 | 1439.73731 | 480.9197  | 1439.73889 | 480.920227  | 3 | 11 | 9.4154  | 14.60 |
| 36 | 40.58 | 42.7  | 45.4 CSNK1D_FlexIII | 99.0 THQHPIPYRENK                     | Label: 13C(6)15N(4)(R) @ 8; Label: 13C(6)15N(2)(K) @ 11                                                    | missed R-E @ 8                  | 0.00627474  | 1439.74512 | 720.8798  | 1439.73889 | 720.876709  | 2 | 8  | 9.0311  | 14.60 |
| 36 | 40.58 | 42.7  | 45.4 CSNK1D_FlexIII | 99.0 TKHPQLHIESK                      | Label: 13C(6)15N(2)(K) @ 2; Label: 13C(6)15N(2)(K) @ 11                                                    | missed K-H @ 2                  | -0.00152065 | 1332.74707 | 445.2563  | 1332.74854 | 445.256775  | 3 | 11 | 13.2973 | 14.60 |
| 36 | 40.58 | 42.7  | 45.4 CSNK1D_FlexIII | 99.0 TKHPQLHIESK                      | Label: 13C(6)15N(2)(K) @ 2; Label: 13C(6)15N(2)(K) @ 11                                                    | missed K-H @ 2                  | -0.0203621  | 1332.72815 | 334.1893  | 1332.74854 | 334.194397  | 4 | 10 | 13.271  | 14.60 |
| 36 | 40.58 | 42.7  | 45.4 CSNK1D_FlexIII | 99.0 TKHPQLHIESK                      | Label: 13C(6)15N(2)(K) @ 2; Label: 13C(6)15N(2)(K) @ 11                                                    | missed K-H @ 2                  | -0.00400465 | 1332.74451 | 334.1934  | 1332.74854 | 334.194397  | 4 | 11 | 13.0093 | 14.60 |
| 36 | 40.58 | 42.7  | 45.4 CSNK1D_FlexIII | 99.0 VASSGLQSVVHR                     | Label: 13C(6)15N(4)(R) @ 12                                                                                |                                 | -0.00239866 | 1248.67896 | 417.2336  | 1248.6814  | 417.234406  | 3 | 12 | 15.4688 | 14.60 |
| 36 | 40.58 | 42.7  | 45.4 CSNK1D_FlexIII | 99.0 VASSGLQSVVHR                     | Label: 13C(6)15N(4)(R) @ 12                                                                                |                                 | -0.00505368 | 1248.67627 | 417.2327  | 1248.6814  | 417.234406  | 3 | 11 | 15.7421 | 14.60 |
| 36 | 40.58 | 42.7  | 45.4 CSNK1D_FlexIII | 99.0 YASINTHLGIEQSR                   | Label: 13C(6)15N(4)(R) @ 14                                                                                |                                 | -0.00283466 | 1597.80615 | 533.6093  | 1597.80884 | 533.61023   | 3 | 11 | 16.3501 | 14.60 |
| 36 | 40.58 | 42.7  | 45.4 CSNK1D_FlexIII | 99.0 YPTFLYK                          | Label: 13C(6)15N(2)(K) @ 7                                                                                 |                                 | -0.00165037 | 938.497681 | 470.2561  | 938.499329 | 470.256928  | 2 | 9  | 18.0092 | 14.60 |
| 36 | 40.58 | 42.7  | 45.4 CSNK1D_FlexIII | 99.0 YPTFLYK                          | Label: 13C(6)15N(2)(K) @ 7                                                                                 |                                 | 0.00020099  | 938.499451 | 470.257   | 938.499329 | 470.256928  | 2 | 9  | 17.9008 | 14.60 |
| 36 | 40.58 | 42.7  | 45.4 CSNK1D_FlexIII | 99.0 YPTFLYK                          | Label: 13C(6)15N(2)(K) @ 7                                                                                 |                                 | -0.00091407 | 938.498474 | 470.2565  | 938.499329 | 470.256928  | 2 | 9  | 17.7612 | 14.60 |
| 37 | 40.52 | 46.67 | 40.3 PRKACB_FlexIII | 99.0 AKEDFLK                          | Label: 13C(6)15N(2)(K) @ 2; Label: 13C(6)15N(2)(K) @ 7                                                     | missed K-E @ 2                  | -0.00158593 | 865.48645  | 433.7505  | 865.488037 | 433.751282  | 2 | 11 | 14.9647 | 9.90  |
| 37 | 40.52 | 46.67 | 40.3 PRKACB_FlexIII | 99.0 AKEDFLKK                         | Label: 13C(6)15N(2)(K) @ 2; Label: 13C(6)15N(2)(K) @ 7; Label: 13C(6)15N(2)(K) @ 8                         | missed K-E @ 2; missed K-K @ 7  | 3.43E-05    | 1001.59711 | 334.873   | 1001.59717 | 334.873016  | 3 | 9  | 13.6607 | 9.90  |
| 37 | 40.52 | 46.67 | 40.3 PRKACB_FlexIII | 99.0 ATEQYYAMK                        | Label: 13C(6)15N(2)(K) @ 9                                                                                 |                                 | -0.00098251 | 1111.50903 | 556.7618  | 1111.50989 | 556.762268  | 2 | 10 | 15.7354 | 9.90  |
| 37 | 40.52 | 46.67 | 40.3 PRKACB_FlexIII | 99.0 DLKPENLLDHQGYIQVTDGFAK           | Label: 13C(6)15N(2)(K) @ 3; Label: 13C(6)15N(2)(K) @ 24                                                    |                                 | 0.014875    | 2776.45581 | 695.1212  | 2776.44067 | 695.117432  | 4 | 13 | 19.3304 | 9.90  |
| 37 | 40.52 | 46.67 | 40.3 PRKACB_FlexIII | 99.0 DLKPENLLDHQGYIQVTDGFAK           | Label: 13C(6)15N(2)(K) @ 3; Label: 13C(6)15N(2)(K) @ 24; Label: 13C(6)15N(4)(R) @ 25                       | missed K-R @ 24                 | -0.013802   | 2942.53662 | 736.6414  | 2942.55005 | 736.644775  | 4 | 12 | 18.948  | 9.90  |
| 37 | 40.52 | 46.67 | 40.3 PRKACB_FlexIII | 99.0 GSEVESVKFEFLAK                   | Label: 13C(6)15N(2)(K) @ 8; Label: 13C(6)15N(2)(K) @ 13                                                    | missed K-E @ 8                  | -0.00109388 | 1437.7677  | 1719.8911 | 1437.76856 | 1719.891602 | 2 | 20 | 17.7936 | 9.90  |
| 37 | 40.52 | 46.67 | 40.3 PRKACB_FlexIII | 99.0 HKATEQYYAMK                      | Label: 13C(6)15N(2)(K) @ 2; Label: 13C(6)15N(2)(K) @ 11                                                    | missed K-A @ 2                  | 0.00117089  | 1384.67908 | 462.567   | 1384.67798 | 462.56662   | 3 | 13 | 14.1173 | 9.90  |
| 37 | 40.52 | 46.67 | 40.3 PRKACB_FlexIII | 99.0 IGRFSEPHAR                       | Label: 13C(6)15N(4)(R) @ 3; Label: 13C(                                                                    |                                 |             |            |           |            |             |   |    |         |       |

|    |       |       |                    |                                     |                                                                                                   |                               |             |            |            |            |            |    |         |         |       |
|----|-------|-------|--------------------|-------------------------------------|---------------------------------------------------------------------------------------------------|-------------------------------|-------------|------------|------------|------------|------------|----|---------|---------|-------|
| 37 | 40.52 | 46.67 | 40.3 PRKACB_FlexII | 99.0 DNSNLVMEYVPGGEMFSHLR           | Deamidated(N) @4; Label:13C(6)15N(4)(R) @22                                                       | 0.0115834                     | 2599.15356  | 867.3918   | 2599.14209 | 867.388001 | 3          | 11 | 20.3677 | 9.90    |       |
| 37 | 40.52 | 46.67 | 40.3 PRKACB_FlexII | 99.0 ATEQYYAMK                      | Label:13C(6)15N(2)(K) @9                                                                          | -0.00122665                   | 1111.50891  | 556.7617   | 1111.50899 | 556.762268 | 2          | 10 | 15.4666 | 9.90    |       |
| 37 | 40.52 | 46.67 | 40.3 PRKACB_FlexII | 99.0 DLKPENLLIDHQYIQVTDGFAK         | Label:13C(6)15N(2)(K) @3; Deamidated(N) @6; Label:13C(6)15N(2)(K) @24                             | 0.0196225                     | 2777.44434  | 926.822    | 2777.42481 | 926.815491 | 3          | 17 | 19.3348 | 9.90    |       |
| 37 | 40.52 | 46.67 | 40.3 PRKACB_FlexII | 99.0 DLKPENLLIDHQYIQVTDGFAK         | Label:13C(6)15N(2)(K) @3; Deamidated(N) @6; Label:13C(6)15N(2)(K) @24                             | 0.0196225                     | 2777.44434  | 926.822    | 2777.42481 | 926.815491 | 3          | 15 | 19.5937 | 9.90    |       |
| 37 | 40.52 | 46.67 | 40.3 PRKACB_FlexII | 99.0 GRTWTLCGTPEYLAPEILSK           | Label:13C(6)15N(4)(R) @2; Propionamide(C) @7; Label:13C(6)15N(2)(K) @21                           | -0.0310932                    | 2436.25293  | 813.0916   | 2436.28418 | 813.10199  | 3          | 16 | 19.6292 | 9.90    |       |
| 37 | 40.52 | 46.67 | 40.3 PRKACB_FlexII | 99.0 GSEVESKFEFLAK                  | Label:13C(6)15N(2)(K) @8; Label:13C(6)15N(2)(K) @13                                               | -0.00245704                   | 1437.76624  | 480.2627   | 1437.76856 | 480.263489 | 3          | 10 | 17.7731 | 9.90    |       |
| 37 | 40.52 | 46.67 | 40.3 PRKACB_FlexII | 99.0 HKATEQYYAMK                    | Label:13C(6)15N(2)(K) @2; Label:13C(6)15N(2)(K) @11                                               | misses R-T @2                 | 0.00238146  | 1384.68042 | 693.3475   | 1384.67798 | 693.346314 | 2  | 17      | 14.122  | 9.90  |
| 37 | 40.52 | 46.67 | 40.3 PRKACB_FlexII | 99.0 HKATEQYYAMK                    | Label:13C(6)15N(2)(K) @2; Label:13C(6)15N(2)(K) @11                                               | misses K-A @2                 | 0.00144555  | 1384.67944 | 462.5671   | 1384.67798 | 462.56662  | 3  | 12      | 14.3877 | 9.90  |
| 37 | 40.52 | 46.67 | 40.3 PRKACB_FlexII | 99.0 HKATEQYYAMK                    | Label:13C(6)15N(2)(K) @2; Label:13C(6)15N(2)(K) @11                                               | misses K-A @2                 | 0.0110586   | 1384.68909 | 462.5703   | 1384.67798 | 462.56662  | 3  | 10      | 14.6633 | 9.90  |
| 37 | 40.52 | 46.67 | 40.3 PRKACB_FlexII | 99.0 KGSEVESKFEFLAK                 | Label:13C(6)15N(2)(K) @1; Label:13C(6)15N(2)(K) @9; Label:13C(6)15N(2)(K) @14                     | misses K-G @1; misses K-E @9  | -0.00267803 | 1573.87512 | 525.6323   | 1573.87781 | 525.633179 | 3  | 18      | 16.9852 | 9.90  |
| 37 | 40.52 | 46.67 | 40.3 PRKACB_FlexII | 99.0 KGSEVESKFEFLAK                 | Label:13C(6)15N(2)(K) @1; Label:13C(6)15N(2)(K) @9; Label:13C(6)15N(2)(K) @14                     | misses K-G @1; misses K-E @9  | 0.0133234   | 1573.89099 | 394.48     | 1573.87781 | 394.476715 | 4  | 13      | 17.106  | 9.90  |
| 37 | 40.52 | 46.67 | 40.3 PRKACB_FlexII | 99.0 KGSEVESKFEFLAK                 | Label:13C(6)15N(2)(K) @1; Label:13C(6)15N(2)(K) @9; Label:13C(6)15N(2)(K) @14                     | misses K-G @1; misses K-E @9  | -0.00798811 | 1573.87    | 525.6306   | 1573.87781 | 525.633179 | 3  | 16      | 17.2532 | 9.90  |
| 37 | 40.52 | 46.67 | 40.3 PRKACB_FlexII | 99.0 KGSEVESKFEFLAK                 | Label:13C(6)15N(2)(K) @1; Label:13C(6)15N(2)(K) @9; Label:13C(6)15N(2)(K) @14                     | misses K-G @1; misses K-E @9  | 0.0107396   | 1573.88843 | 787.9515   | 1573.87781 | 787.946167 | 2  | 21      | 17.2803 | 9.90  |
| 37 | 40.52 | 46.67 | 40.3 PRKACB_FlexII | 99.0 KGSEVESKFEFLAK                 | Label:13C(6)15N(2)(K) @1; Label:13C(6)15N(2)(K) @9; Label:13C(6)15N(2)(K) @14                     | misses K-G @1; misses K-E @9  | -0.00798811 | 1573.87    | 525.6306   | 1573.87781 | 525.633179 | 3  | 11      | 26.7036 | 9.90  |
| 37 | 40.52 | 46.67 | 40.3 PRKACB_FlexII | 99.0 KKTLTGTSFGFR                   | Label:13C(6)15N(2)(K) @1; Label:13C(6)15N(2)(K) @2; Label:13C(6)15N(4)(R) @11                     | misses K-K @1; misses K-T @2  | -0.0142171  | 1176.66821 | 393.23     | 1176.6825  | 393.234772 | 3  | 11      | 13.8688 | 9.90  |
| 37 | 40.52 | 46.67 | 40.3 PRKACB_FlexII | 99.0 KKTLTGTSFGFR                   | Label:13C(6)15N(2)(K) @1; Label:13C(6)15N(2)(K) @2; Label:13C(6)15N(4)(R) @11                     | misses K-K @1; misses K-T @2  | -0.0142171  | 1176.66821 | 393.23     | 1176.6825  | 393.234772 | 3  | 10      | 14.1391 | 9.90  |
| 37 | 40.52 | 46.67 | 40.3 PRKACB_FlexII | 99.0 KWTENPTQNNAGLEDFER             | Label:13C(6)15N(2)(K) @1; Label:13C(6)15N(4)(R) @17                                               | misses K-W @1                 | 0.00966655  | 2064.97168 | 689.3312   | 2064.96191 | 689.327942 | 3  | 21      | 17.042  | 9.90  |
| 37 | 40.52 | 46.67 | 40.3 PRKACB_FlexII | 99.0 KWTENPTQNNAGLEDFER             | Label:13C(6)15N(2)(K) @1; Deamidated(N) @4; Label:13C(6)15N(4)(R) @17                             | misses K-W @1                 | 0.0243018   | 2065.96924 | 1033.992   | 2065.94605 | 1033.98023 | 2  | 15      | 17.0595 | 9.90  |
| 37 | 40.52 | 46.67 | 40.3 PRKACB_FlexII | 99.0 KWTENPTQNNAGLEDFER             | Label:13C(6)15N(2)(K) @1; Deamidated(N) @8; Label:13C(6)15N(4)(R) @17                             | misses K-W @1                 | 0.0243018   | 2065.96924 | 1033.992   | 2065.94605 | 1033.98023 | 2  | 21      | 17.3268 | 9.90  |
| 37 | 40.52 | 46.67 | 40.3 PRKACB_FlexII | 99.0 LKQIEHTLNEK                    | Label:13C(6)15N(2)(K) @2; Label:13C(6)15N(2)(K) @11                                               | misses K-Q @2                 | -0.00539219 | 1367.76904 | 456.9303   | 1367.77441 | 456.932068 | 3  | 12      | 13.9827 | 9.90  |
| 37 | 40.52 | 46.67 | 40.3 PRKACB_FlexII | 99.0 LKQIEHTLNEK                    | Label:13C(6)15N(2)(K) @2; Label:13C(6)15N(2)(K) @11                                               | misses K-Q @2                 | -0.00403928 | 1367.77051 | 342.9499   | 1367.77441 | 342.950867 | 4  | 11      | 13.9892 | 9.90  |
| 37 | 40.52 | 46.67 | 40.3 PRKACB_FlexII | 99.0 LKQIEHTLNEKR                   | Label:13C(6)15N(2)(K) @2; Label:13C(6)15N(2)(K) @11; Label:13C(6)15N(4)(R) @12                    | misses K-Q @2; misses K-R @11 | 0.00461711  | 1533.88843 | 767.9515   | 1533.88379 | 767.949158 | 2  | 17      | 13.619  | 9.90  |
| 37 | 40.52 | 46.67 | 40.3 PRKACB_FlexII | 99.0 LKQIEHTLNEKR                   | Label:13C(6)15N(2)(K) @2; Label:13C(6)15N(2)(K) @11; Label:13C(6)15N(4)(R) @12                    | misses K-Q @2; misses K-R @11 | 0.00720086  | 1533.89099 | 384.48     | 1533.88379 | 384.47821  | 4  | 11      | 13.5616 | 9.90  |
| 37 | 40.52 | 46.67 | 40.3 PRKACB_FlexII | 99.0 LKQIEHTLNEKR                   | Label:13C(6)15N(2)(K) @2; Label:13C(6)15N(2)(K) @11; Label:13C(6)15N(4)(R) @12                    | misses K-Q @2; misses K-R @11 | -0.00416186 | 1533.87964 | 512.3005   | 1533.88379 | 512.30188  | 3  | 10      | 26.7871 | 9.90  |
| 37 | 40.52 | 46.67 | 40.3 PRKACB_FlexII | 99.0 LKQIEHTLNEKR                   | Label:13C(6)15N(2)(K) @2; Label:13C(6)15N(2)(K) @11; Label:13C(6)15N(4)(R) @12                    | misses K-Q @2; misses K-R @11 | 0.00720086  | 1533.89099 | 384.48     | 1533.88379 | 384.47821  | 4  | 10      | 13.8409 | 9.90  |
| 37 | 40.52 | 46.67 | 40.3 PRKACB_FlexII | 99.0 QIEHTLNEK                      | Gln->pyro-Glu @N-term; Label:13C(6)15N(2)(K) @9                                                   | 0.00072476                    | 1101.5553   | 551.7849   | 1101.55457 | 551.784546 | 2          | 12 | 15.7376 | 9.90    |       |
| 37 | 40.52 | 46.67 | 40.3 PRKACB_FlexII | 99.0 QIEHTLNEKR                     | Gln->pyro-Glu @N-term; Label:13C(6)15N(2)(K) @9; Label:13C(6)15N(4)(R) @10                        | misses K-R @9                 | 0.00341995  | 1267.66724 | 634.8409   | 1267.66394 | 634.839233 | 2  | 15      | 14.8384 | 9.90  |
| 37 | 40.52 | 46.67 | 40.3 PRKACB_FlexII | 99.0 QIEHTLNEKR                     | Label:13C(6)15N(2)(K) @9; Label:13C(6)15N(4)(R) @10                                               | misses K-R @9                 | 0.00208138  | 1284.69263 | 643.3536   | 1284.69055 | 643.352539 | 2  | 9       | 10.8705 | 9.90  |
| 37 | 40.52 | 46.67 | 40.3 PRKACB_FlexII | 99.0 TLGTGSFGFR                     | Label:13C(6)15N(4)(R) @9                                                                          | 0.00174825                    | 904.466065  | 453.2403   | 904.464172 | 453.23938  | 2          | 9  | 14.3606 | 9.90    |       |
| 37 | 40.52 | 46.67 | 40.3 PRKACB_FlexII | 99.0 TLGTGSFGFR                     | Label:13C(6)15N(4)(R) @9                                                                          | -0.00203595                   | 904.46228   | 453.2384   | 904.464172 | 453.23938  | 2          | 8  | 16.0149 | 9.90    |       |
| 37 | 40.52 | 46.67 | 40.3 PRKACB_FlexII | 99.0 TWTLCGTPEYLAPEILSK             | Propionamide(C) @5; Label:13C(6)15N(2)(K) @19                                                     | -0.0112573                    | 2213.14209  | 738.7213   | 2213.15332 | 738.725037 | 3          | 20 | 20.33   | 9.90    |       |
| 37 | 40.52 | 46.67 | 40.3 PRKACB_FlexII | 99.0 TWTLCGTPEYLAPEILSK             | Propionamide(C) @5; Label:13C(6)15N(2)(K) @19                                                     | 0.0006786                     | 2213.15332  | 1107.584   | 2213.15332 | 1107.58398 | 2          | 18 | 20.5143 | 9.90    |       |
| 37 | 40.52 | 46.67 | 40.3 PRKACB_FlexII | 99.0 WENPTQNNAGLEDFER               | Label:13C(6)15N(4)(R) @16                                                                         | -0.00303158                   | 1928.84985  | 965.4322   | 1928.85278 | 965.433716 | 2          | 19 | 17.7227 | 9.90    |       |
| 37 | 40.52 | 46.67 | 40.3 PRKACB_FlexII | 99.0 YPTFLYK                        | Label:13C(6)15N(2)(K) @7                                                                          | -0.00165037                   | 938.497681  | 470.2561   | 938.499329 | 470.256928 | 2          | 9  | 18.0092 | 9.90    |       |
| 37 | 40.52 | 46.67 | 40.3 PRKACB_FlexII | 99.0 YPTFLYK                        | Label:13C(6)15N(2)(K) @7                                                                          | misses F-Y @N-term            | 0.00020099  | 938.499451 | 470.257    | 938.499329 | 470.256928 | 2  | 9       | 17.9008 | 9.90  |
| 37 | 40.52 | 46.67 | 40.3 PRKACB_FlexII | 99.0 YPTFLYK                        | Label:13C(6)15N(2)(K) @7                                                                          | misses F-Y @N-term            | -0.00091407 | 938.498474 | 470.2565   | 938.499329 | 470.256928 | 2  | 9       | 17.7612 | 9.90  |
| 38 | 40.23 | 42.26 | 57.4 CDK4_FlexII   | 99.0 APPGPLPAETIKDLMR               | Label:13C(6)15N(2)(K) @2; Label:13C(6)15N(4)(R) @16                                               | -0.00076187                   | 1722.94519  | 575.3223   | 1722.9468  | 575.32251  | 3          | 15 | 18.9613 | 14.73   |       |
| 38 | 40.23 | 42.26 | 57.4 CDK4_FlexII   | 99.0 ARDPHSGHFVALK                  | Label:13C(6)15N(4)(R) @2; Label:13C(6)15N(2)(K) @13                                               | -0.00940908                   | 1451.76587  | 726.8902   | 1451.77527 | 726.894898 | 2          | 19 | 14.2423 | 14.73   |       |
| 38 | 40.23 | 42.26 | 57.4 CDK4_FlexII   | 99.0 DLKPENILVTSGGTVK               | Label:13C(6)15N(2)(K) @3; Label:13C(6)15N(2)(K) @16                                               | -0.00778169                   | 1685.94568  | 843.9801   | 1685.95349 | 843.984009 | 2          | 19 | 17.3385 | 14.73   |       |
| 38 | 40.23 | 42.26 | 57.4 CDK4_FlexII   | 99.0 DPHSGHFVALK                    | Label:13C(6)15N(2)(K) @11                                                                         | -0.00026089                   | 1214.62842  | 608.3215   | 1214.62878 | 608.321655 | 2          | 14 | 15.0454 | 14.73   |       |
| 38 | 40.23 | 42.26 | 57.4 CDK4_FlexII   | 99.0 DVSLPFR                        | Label:13C(6)15N(4)(R) @6                                                                          | 0.00061018                    | 695.384644  | 348.6996   | 695.384155 | 348.699341 | 2          | 7  | 15.5728 | 14.73   |       |
| 38 | 40.23 | 42.26 | 57.4 CDK4_FlexII   | 99.0 GLDFLHANCIVHR                  | Propionamide(C) @9; Label:13C(6)15N(4)(R) @13                                                     | 0.00063439                    | 1574.80212  | 394.7078   | 1574.80118 | 394.707672 | 4          | 10 | 17.6479 | 14.73   |       |
| 38 | 40.23 | 42.26 | 57.4 CDK4_FlexII   | 99.0 GPRPVQSV/PEMEEGAQLLLEMLTFNPHK  | Label:13C(6)15N(4)(R) @3; Deamidated(Q) @18; Label:13C(6)15N(2)(K) @30                            | 0.0352291                     | 3351.73145  | 838.9401   | 3351.69629 | 838.931335 | 4          | 17 | 20.5356 | 14.73   |       |
| 38 | 40.23 | 42.26 | 57.4 CDK4_FlexII   | 99.0 GPRPVQSV/PEMEEGAQLLLEMLTFNPHKR | Label:13C(6)15N(4)(R) @3; Deamidated(Q) @18; Label:13C(6)15N(2)(K) @30; Label:13C(6)15N(4)(R) @31 | misses K-R @30                | 0.00585335  | 3517.81128 | 880.4601   | 3517.80566 | 880.458679 | 4  | 16      | 20.706  | 14.73 |
| 38 | 40.23 | 42.26 | 57.4 CDK4_FlexII   | 99.0 IFDLGLPPEDDWPR                 | 0.00687123                                                                                        | 1781.90564                    | 891.9601    | 1781.8988  | 891.956665 | 891.956665 | 2          | 16 | 20.4096 | 14.73   |       |
| 38 | 40.23 | 42.26 | 57.4 CDK4_FlexII   | 99.0 KPLFCGNSADQLGK                 | Label:13C(6)15N(2)(K) @1; Propionamide(C) @5; Label:13C(6)15N(2)(K) @15                           | -0.00038572                   | 1692.84717  | 565.2897   | 1692.84766 | 565.289795 | 3          | 17 | 16.2367 | 14.73   |       |
| 38 | 40.23 | 42.26 | 57.4 CDK4_FlexII   | 99.0 LADFLGAR                       | Label:13C(6)15N(4)(R) @8                                                                          | 0.00035629                    | 871.479492  | 436.747    | 871.479126 | 436.746826 | 2          | 9  | 17.4043 | 14.73   |       |
| 38 | 40.23 | 42.26 | 57.4 CDK4_FlexII   | 99.0 LEAFEPNVVR                     | Label:13C(6)15N(4)(R) @11                                                                         | -0.0003331                    | 1319.68591  | 660.8502   | 1319.68616 | 660.850342 | 2          | 15 | 16.1965 | 14.73   |       |
| 38 | 40.23 | 42.26 | 57.4 CDK4_FlexII   | 99.0 LMDVCATSR                      | Propionamide(C) @5; Label:13C(6)15N(4)(R) @9                                                      | 0.00022082                    | 1075.5033   | 538.7589   | 1075.50293 | 538.758789 | 2          | 10 | 15.8506 | 14.73   |       |
| 38 | 40.23 | 42.26 | 57.4 CDK4_FlexII   | 99.0 RKPLFCGNSADQLGK                | Label:13C(6)15N(4)(R) @1; Label:13C(6)15N(2)(K) @2; Propionamide(C) @6; Label:13C(6)15N(2)(K) @16 | -0.0035164                    | 1858.95337  | 620.6584   | 1858.95703 | 620.659607 | 3          | 17 | 15.7827 | 14.73   |       |
| 38 | 40.23 | 42.26 | 57.4 CDK4_FlexII   | 99.0 RLEAFEPNVVR                    | Label:13C(6)15N(4)(R) @1; Label:13C(6)15N(4)(R) @12                                               | -0.00968937                   | 1485.78589  | 743.9002   | 1485.79553 | 743.905029 | 2          | 14 | 15.9072 | 14.73   |       |
| 38 | 40.23 | 42.26 | 57.4 CDK4_FlexII   | 99.0 SVRVPNGGGGGGLPISTVR            | Label:13C(6)15N(4)(R) @3; Label:13C(6)15N(4)(R) @20                                               | 0.00570611                    | 1856.01868  | 619.6802   | 1856.01318 | 619.678345 | 3          | 23 | 16.6415 | 14.73   |       |
| 38 | 40.23 | 42.26 | 57.4 CDK4_FlexII   | 99.0 VPNGGGGGGGGLPISTVR             | Label:13C(6)15N(4)(R) @17                                                                         | 0.00242495                    | 1503.80591  | 752.9102   | 1503.80335 | 752.908936 | 2          | 19 | 16.7735 | 14.73   |       |
| 38 | 40.23 | 42.26 | 57.4 CDK4_FlexII   | 99.0 VTLVFEHVDDLR                   | -0.0094023                                                                                        | 1569.80591                    | 785.9102    | 1569.81506 | 785.914856 | 785.914856 | 2          | 13 | 18.1502 | 14.73   |       |
| 38 | 40.23 | 42.26 | 57.4 CDK4_FlexII   | 99.0 YEP/AEIGVAGYGVYK               | Label:13C(6)15N(2)(K) @17                                                                         | 0.00473907                    | 1822.9281   | 912.4713   | 1822.92322 | 912.468933 | 2          | 14 | 26.527  | 14.73   |       |
| 38 | 40.23 | 42.26 | 57.4 CDK4_FlexII   | 99.0 ARDPHSGHFVALK                  | Label:13C(6)15N(4)(R) @2; Label:13C(6)15N(2)(K) @13                                               | -0.00061303                   | 1451.77454  | 363.9509   | 1451.77527 | 363.95108  | 4          | 13 | 14.1928 | 14.73   |       |
| 38 | 40.23 | 42.26 | 57.4 CDK4_FlexII   | 99.0 ARDPHSGHFVALK                  | Label:13C(6)15N(4)(R) @2; Label:13C(6)15N(2)(K) @13                                               | 0.00024146                    | 1451.77539  | 363.9511   |            |            |            |    |         |         |       |

|    |       |       |                  |                                     |                                                                                               |               |             |            |          |            |            |   |    |         |       |
|----|-------|-------|------------------|-------------------------------------|-----------------------------------------------------------------------------------------------|---------------|-------------|------------|----------|------------|------------|---|----|---------|-------|
| 38 | 40.23 | 42.26 | 57.4 CDK4_FlexII | 99.0 GPRPVQSV/PEMEESGAQLLEMLTFNPHKR | Label:13C(6)15N(4)(R)@3; Deamidated(O)@18; Label:13C(6)15N(2)(K)@30; Label:13C(6)15N(4)(R)@31 | missed K-R@30 | 0.0325222   | 3517.83814 | 1173.62  | 3517.80566 | 1173.60913 | 3 | 23 | 20.4894 | 14.73 |
| 38 | 40.23 | 42.26 | 57.4 CDK4_FlexII | 99.0 GPRPVQSV/PEMEESGAQLLEMLTFNPHKR | Label:13C(6)15N(4)(R)@3; Deamidated(O)@18; Label:13C(6)15N(2)(K)@30; Label:13C(6)15N(4)(R)@31 | missed K-R@30 | 0.00903068  | 3517.81445 | 704.5702 | 3517.80566 | 704.56842  | 5 | 14 | 20.6863 | 14.73 |
| 38 | 40.23 | 42.26 | 57.4 CDK4_FlexII | 99.0 IFDLGLPPEDDWR                  | Label:13C(6)15N(4)(R)@15                                                                      |               | -0.00667456 | 1791.90149 | 896.958  | 1791.9071  | 896.960815 | 2 | 18 | 20.3241 | 14.73 |
| 38 | 40.23 | 42.26 | 57.4 CDK4_FlexII | 99.0 IFDLGLPPEDDWR                  | Label:13C(6)15N(4)(R)@15                                                                      |               | 0.00177522  | 1791.90869 | 598.3102 | 1791.9071  | 598.309631 | 3 | 14 | 20.352  | 14.73 |
| 38 | 40.23 | 42.26 | 57.4 CDK4_FlexII | 99.0 IFDLGLPPEDDWR                  | Label:13C(6)15N(4)(R)@15                                                                      |               | -0.0014021  | 1791.90564 | 896.9601 | 1791.9071  | 896.960815 | 2 | 13 | 26.5366 | 14.73 |
| 38 | 40.23 | 42.26 | 57.4 CDK4_FlexII | 99.0 IFDLGLPPEDDWR                  | Label:13C(6)15N(4)(R)@15                                                                      |               | -0.0014021  | 1791.90564 | 896.9601 | 1791.9071  | 896.960815 | 2 | 10 | 21.4168 | 14.73 |
| 38 | 40.23 | 42.26 | 57.4 CDK4_FlexII | 99.0 KPLFCGNSEADQLGK                | Label:13C(6)15N(2)(K)@1; Propionamide(C)@5; Deamidated(O)@12; Label:13C(6)15N(2)(K)@15        |               | 0.0140689   | 1693.8457  | 847.9301 | 1693.83167 | 847.923096 | 2 | 14 | 16.2985 | 14.73 |
| 38 | 40.23 | 42.26 | 57.4 CDK4_FlexII | 99.0 LADFLGAR                       |                                                                                               |               | 0.00093357  | 861.471863 | 431.7432 | 861.470825 | 431.742706 | 2 | 11 | 17.3967 | 14.73 |
| 38 | 40.23 | 42.26 | 57.4 CDK4_FlexII | 99.0 LADFLGAR                       | Label:13C(6)15N(4)(R)@8                                                                       |               | 0.00029579  | 871.479492 | 436.747  | 871.479126 | 436.746826 | 2 | 9  | 17.3885 | 14.73 |
| 38 | 40.23 | 42.26 | 57.4 CDK4_FlexII | 99.0 LEAFEPNVVR                     | Label:13C(6)15N(4)(R)@11                                                                      |               | 0.00070799  | 1319.68689 | 440.9029 | 1319.68616 | 440.902649 | 3 | 10 | 16.1672 | 14.73 |
| 38 | 40.23 | 42.26 | 57.4 CDK4_FlexII | 99.0 LMDVCATSR                      | Propionamide(C)@5; Label:13C(6)15N(4)(R)@9                                                    |               | 0.00302844  | 1075.5061  | 538.7603 | 1075.50293 | 538.758789 | 2 | 10 | 14.8481 | 14.73 |
| 38 | 40.23 | 42.26 | 57.4 CDK4_FlexII | 99.0 LMDVCATSR                      | Propionamide(C)@5                                                                             |               | -0.00188182 | 1065.49292 | 533.7537 | 1065.49475 | 533.754639 | 2 | 10 | 15.6457 | 14.73 |
| 38 | 40.23 | 42.26 | 57.4 CDK4_FlexII | 99.0 LMDVCATSR                      | Propionamide(C)@5; Label:13C(6)15N(4)(R)@9                                                    |               | 0.00095324  | 1075.50391 | 538.7592 | 1075.50293 | 538.758789 | 2 | 10 | 15.5753 | 14.73 |
| 38 | 40.23 | 42.26 | 57.4 CDK4_FlexII | 99.0 LMDVCATSR                      | Propionamide(C)@5; Label:13C(6)15N(4)(R)@9                                                    |               | 0.00022432  | 1075.50305 | 359.5083 | 1075.50293 | 359.50827  | 3 | 9  | 14.7756 | 14.73 |
| 38 | 40.23 | 42.26 | 57.4 CDK4_FlexII | 99.0 RKPLFCGNSEADQLGK               | Label:13C(6)15N(4)(R)@1; Label:13C(6)15N(2)(K)@2; Propionamide(C)@6; Label:13C(6)15N(2)(K)@16 | missed R-K@1  | 0.00399092  | 1858.96082 | 620.6609 | 1858.95703 | 620.659607 | 3 | 19 | 15.5235 | 14.73 |
| 38 | 40.23 | 42.26 | 57.4 CDK4_FlexII | 99.0 RKPLFCGNSEADQLGK               | Label:13C(6)15N(4)(R)@1; Label:13C(6)15N(2)(K)@2; Propionamide(C)@6; Label:13C(6)15N(2)(K)@16 | missed R-K@1  | 0.00082609  | 1858.9657  | 930.4901 | 1858.95703 | 930.485779 | 2 | 21 | 15.658  | 14.73 |
| 38 | 40.23 | 42.26 | 57.4 CDK4_FlexII | 99.0 RKPLFCGNSEADQLGK               | Label:13C(6)15N(4)(R)@1; Label:13C(6)15N(2)(K)@2; Propionamide(C)@6; Label:13C(6)15N(2)(K)@16 | missed R-K@1  | 0.0151028   | 1858.97217 | 465.7503 | 1858.95703 | 465.746521 | 4 | 12 | 15.5295 | 14.73 |
| 38 | 40.23 | 42.26 | 57.4 CDK4_FlexII | 99.0 RLEAFEPNVVR                    | Label:13C(6)15N(4)(R)@1; Label:13C(6)15N(4)(R)@12                                             | missed R-L@1  | -0.00654257 | 1485.78906 | 496.2703 | 1485.79553 | 496.272461 | 3 | 14 | 15.7019 | 14.73 |
| 38 | 40.23 | 42.26 | 57.4 CDK4_FlexII | 99.0 RLEAFEPNVVR                    | Label:13C(6)15N(4)(R)@1; Label:13C(6)15N(4)(R)@12                                             | missed R-L@1  | -0.00654257 | 1485.78906 | 496.2703 | 1485.79553 | 496.272461 | 3 | 14 | 15.9697 | 14.73 |
| 38 | 40.23 | 42.26 | 57.4 CDK4_FlexII | 99.0 RLEAFEPNVVR                    | Label:13C(6)15N(4)(R)@1; Label:13C(6)15N(4)(R)@12                                             | missed R-L@1  | -3.88E-05   | 1485.79529 | 372.4561 | 1485.79553 | 372.456146 | 4 | 13 | 16.05   | 14.73 |
| 38 | 40.23 | 42.26 | 57.4 CDK4_FlexII | 99.0 RLEAFEPNVVR                    | Label:13C(6)15N(4)(R)@1; Label:13C(6)15N(4)(R)@12                                             | missed R-L@1  | -3.88E-05   | 1485.79529 | 372.4561 | 1485.79553 | 372.456146 | 4 | 12 | 15.7646 | 14.73 |
| 38 | 40.23 | 42.26 | 57.4 CDK4_FlexII | 99.0 RLEAFEPNVVR                    | Label:13C(6)15N(4)(R)@1; Label:13C(6)15N(4)(R)@12                                             | missed R-L@1  | -0.00654257 | 1485.78906 | 496.2703 | 1485.79553 | 496.272461 | 3 | 9  | 26.8946 | 14.73 |
| 38 | 40.23 | 42.26 | 57.4 CDK4_FlexII | 99.0 RLEAFEPNVVR                    | Label:13C(6)15N(4)(R)@1; Label:13C(6)15N(4)(R)@12                                             | missed R-L@1  | -0.00654257 | 1485.78906 | 496.2703 | 1485.79553 | 496.272461 | 3 | 10 | 16.2318 | 14.73 |
| 38 | 40.23 | 42.26 | 57.4 CDK4_FlexII | 99.0 SVRVPNGGGGGGLPISTVR            | Label:13C(6)15N(4)(R)@3; Deamidated(N)@6; Label:13C(6)15N(4)(R)@20                            | missed R-V@3  | 0.008503    | 1857.00562 | 929.5101 | 1856.99719 | 929.505859 | 2 | 14 | 16.8519 | 14.73 |
| 38 | 40.23 | 42.26 | 57.4 CDK4_FlexII | 99.0 SVRVPNGGGGGGLPISTVR            | Label:13C(6)15N(4)(R)@3; Deamidated(N)@6; Label:13C(6)15N(4)(R)@20                            | missed R-V@3  | -0.0005267  | 1856.99683 | 620.0062 | 1856.99719 | 620.006348 | 3 | 22 | 16.9101 | 14.73 |
| 38 | 40.23 | 42.26 | 57.4 CDK4_FlexII | 99.0 VPNGGGGGGLPISTVR               | Deamidated(N)@3; Label:13C(6)15N(4)(R)@17                                                     |               | -0.00038989 | 1504.78711 | 753.4008 | 1504.78735 | 753.40094  | 2 | 23 | 17.0315 | 14.73 |
| 38 | 40.23 | 42.26 | 57.4 CDK4_FlexII | 99.0 VPNGGGGGGLPISTVR               | Deamidated(N)@3; Label:13C(6)15N(4)(R)@17                                                     |               | -0.00038989 | 1504.78711 | 753.4008 | 1504.78735 | 753.40094  | 2 | 22 | 17.2988 | 14.73 |
| 38 | 40.23 | 42.26 | 57.4 CDK4_FlexII | 99.0 VPNGGGGGGLPISTVR               | Deamidated(N)@3; Label:13C(6)15N(4)(R)@17                                                     |               | -0.00148853 | 1504.78589 | 753.4002 | 1504.78735 | 753.40094  | 2 | 14 | 26.6465 | 14.73 |
| 38 | 40.23 | 42.26 | 57.4 CDK4_FlexII | 99.0 VPNGGGGGGLPISTVR               | Deamidated(N)@3; Label:13C(6)15N(4)(R)@17                                                     |               | -0.00148853 | 1504.78589 | 753.4002 | 1504.78735 | 753.40094  | 2 | 11 | 21.8482 | 14.73 |
| 38 | 40.23 | 42.26 | 57.4 CDK4_FlexII | 99.0 VPNGGGGGGLPISTVR               | Deamidated(N)@3; Label:13C(6)15N(4)(R)@17                                                     |               | -0.00148853 | 1504.78589 | 753.4002 | 1504.78735 | 753.40094  | 2 | 11 | 21.5602 | 14.73 |
| 38 | 40.23 | 42.26 | 57.4 CDK4_FlexII | 99.0 VPNGGGGGGLPISTVR               | Deamidated(N)@3; Label:13C(6)15N(4)(R)@17                                                     |               | -0.00136646 | 1504.78613 | 753.4003 | 1504.78735 | 753.40094  | 2 | 12 | 17.5661 | 14.73 |
| 38 | 40.23 | 42.26 | 57.4 CDK4_FlexII | 99.0 VPNGGGGGGLPISTVR               | Deamidated(N)@3; Label:13C(6)15N(4)(R)@17                                                     |               | -0.00148853 | 1504.78589 | 753.4002 | 1504.78735 | 753.40094  | 2 | 11 | 21.2598 | 14.73 |
| 38 | 40.23 | 42.26 | 57.4 CDK4_FlexII | 99.0 VPNGGGGGGLPISTVR               | Deamidated(N)@3; Label:13C(6)15N(4)(R)@17                                                     |               | 0.00241772  | 1504.78992 | 753.4022 | 1504.78735 | 753.40094  | 2 | 11 | 17.8294 | 14.73 |
| 38 | 40.23 | 42.26 | 57.4 CDK4_FlexII | 99.0 VTLVFEHVDQDLR                  | Label:13C(6)15N(4)(R)@13                                                                      |               | -0.00082994 | 1579.82263 | 790.9186 | 1579.82336 | 790.918945 | 2 | 19 | 17.987  | 14.73 |
| 38 | 40.23 | 42.26 | 57.4 CDK4_FlexII | 99.0 VTLVFEHVDQDLR                  | Label:13C(6)15N(4)(R)@13                                                                      |               | 0.00057736  | 1579.82373 | 527.6152 | 1579.82336 | 527.615051 | 3 | 13 | 18.0115 | 14.73 |
| 38 | 40.23 | 42.26 | 57.4 CDK4_FlexII | 99.0 VTLVFEHVDQDLR                  | Label:13C(6)15N(4)(R)@13                                                                      |               | -0.00046373 | 1579.82312 | 790.9188 | 1579.82336 | 790.918945 | 2 | 18 | 18.26   | 14.73 |
| 38 | 40.23 | 42.26 | 57.4 CDK4_FlexII | 99.0 VTLVFEHVDQDLR                  | Label:13C(6)15N(4)(R)@13                                                                      |               | 0.00057736  | 1579.82373 | 527.6152 | 1579.82336 | 527.615051 | 3 | 13 | 18.2837 | 14.73 |
| 38 | 40.23 | 42.26 | 57.4 CDK4_FlexII | 99.0 VTLVFEHVDQDLR                  | Label:13C(6)15N(4)(R)@13                                                                      |               | 0.00234388  | 1579.82593 | 790.9202 | 1579.82336 | 790.918945 | 2 | 13 | 21.0044 | 14.73 |
| 38 | 40.23 | 42.26 | 57.4 CDK4_FlexII | 99.0 VTLVFEHVDQDLR                  | Label:13C(6)15N(4)(R)@13                                                                      |               | 0.00234388  | 1579.82593 | 790.9202 | 1579.82336 | 790.918945 | 2 | 11 | 21.7066 | 14.73 |
| 38 | 40.23 | 42.26 | 57.4 CDK4_FlexII | 99.0 VTLVFEHVDQDLR                  | Label:13C(6)15N(4)(R)@13                                                                      |               | 0.00234388  | 1579.82593 | 790.9202 | 1579.82336 | 790.918945 | 2 | 11 | 21.3437 | 14.73 |
| 38 | 40.23 | 42.26 | 57.4 CDK4_FlexII | 99.0 VTLVFEHVDQDLR                  |                                                                                               |               | 0.00396789  | 1569.81897 | 524.2803 | 1569.81506 | 524.278992 | 3 | 12 | 18.0496 | 14.73 |
| 38 | 40.23 | 42.26 | 57.4 CDK4_FlexII | 99.0 VTLVFEHVDQDLR                  | Label:13C(6)15N(4)(R)@13                                                                      |               | -0.0144373  | 1579.80884 | 527.6102 | 1579.82336 | 527.615051 | 3 | 9  | 24.3933 | 14.73 |
| 38 | 40.23 | 42.26 | 57.4 CDK4_FlexII | 99.0 VTLVFEHVDQDLR                  | Label:13C(6)15N(4)(R)@13                                                                      |               | 0.0018591   | 1579.82532 | 527.6157 | 1579.82336 | 527.615051 | 3 | 10 | 26.5948 | 14.73 |
| 38 | 40.23 | 42.26 | 57.4 CDK4_FlexII | 99.0 VTLVFEHVDQDLR                  | Label:13C(6)15N(4)(R)@13                                                                      |               | 0.015592    | 1579.83875 | 527.6202 | 1579.82332 | 527.615051 | 3 | 8  | 23.6481 | 14.73 |
| 38 | 40.23 | 42.26 | 57.4 CDK4_FlexII | 99.0 YEPVAEIGVGAGTVYK               | Label:13C(6)15N(2)(K)@17                                                                      |               | 0.00473907  | 1822.9281  | 912.4713 | 1822.92322 | 912.468933 | 2 | 23 | 18.3565 | 14.73 |
| 38 | 40.23 | 42.26 | 57.4 CDK4_FlexII | 99.0 YEPVAEIGVGAGTVYK               | Label:13C(6)15N(2)(K)@17                                                                      |               | 0.00473907  | 1822.9281  | 912.4713 | 1822.92322 | 912.468933 | 2 | 15 | 18.6275 | 14.73 |
| 38 | 40.23 | 42.26 | 57.4 CDK4_FlexII | 99.0 YEPVAEIGVGAGTVYK               | Label:13C(6)15N(2)(K)@17                                                                      |               | 0.00158871  | 1822.92493 | 912.4697 | 1822.92322 | 912.468933 | 2 | 23 | 18.2707 | 14.73 |
| 38 | 40.23 | 42.26 | 57.4 CDK4_FlexII | 99.0 YEPVAEIGVGAGTVYK               | Label:13C(6)15N(2)(K)@17                                                                      |               | 0.00568156  | 1822.9292  | 608.6503 | 1822.92322 | 608.648377 | 3 | 21 | 18.2976 | 14.73 |
| 38 | 40.23 | 42.26 | 57.4 CDK4_FlexII | 99.0 YEPVAEIGVGAGTVYK               | Label:13C(6)15N(2)(K)@17                                                                      |               | 0.00012387  | 1822.92346 | 912.469  | 1822.92322 | 912.468933 | 2 | 22 | 18.539  | 14.73 |
| 38 | 40.23 | 42.26 | 57.4 CDK4_FlexII | 99.0 YEPVAEIGVGAGTVYK               | Label:13C(6)15N(2)(K)@17                                                                      |               | 0.00110392  | 1822.92419 | 608.6487 | 1822.92322 | 608.648377 | 3 | 16 | 18.5697 | 14.73 |
| 38 | 40.23 | 42.26 | 57.4 CDK4_FlexII | 99.0 YEPVAEIGVGAGTVYK               | Label:13C(6)15N(2)(K)@17                                                                      |               | -0.0119611  | 1822.9115  | 912.463  | 1822.92322 | 912.468933 | 2 | 14 | 18.8179 | 14.73 |
| 38 | 40.23 | 42.26 | 57.4 CDK4_FlexII | 99.0 YEPVAEIGVGAGTVYK               | Label:13C(6)15N(2)(K)@17                                                                      |               | -0.00378238 | 1822.91943 | 912.467  | 1822.92322 | 912.468933 | 2 | 17 | 19.3648 | 14.73 |
| 38 | 40.23 | 42.26 | 57.4 CDK4_FlexII | 99.0 YEPVAEIGVGAGTVYK               | Label:13C(6)15N(2)(K)@17                                                                      |               | 0.00232113  | 1822.92566 | 912.4701 | 1822.92322 | 912.468933 | 2 | 22 | 19.9265 | 14.73 |
| 38 | 40.23 | 42.26 | 57.4 CDK4_FlexII | 99.0 YEPVAEIGVGAGTVYK               | Label:13C(6)15N(2)(K)@17                                                                      |               | -0.00256168 | 1822.9209  | 912.4677 | 1822.92322 | 912.468933 | 2 | 16 | 20.4525 | 14.73 |
| 38 | 40.23 | 42.26 | 57.4 CDK4_FlexII | 99.0 YEPVAEIGVGAGTVYK               | Label:13C(6)15N(2)(K)@17                                                                      |               | 0.00232113  | 1822.92566 | 912.4701 | 1822.92322 | 912.468933 | 2 | 20 | 20.7147 | 14.73 |
| 38 | 40.23 | 42.26 | 57.4 CDK4_FlexII | 99.0 YEPVAEIGVGAGTVYK               | Label:13C(6)15N(2)(K)@17                                                                      |               | 0.00232113  | 1822.92566 | 912.4701 | 1822.92322 | 912.468933 | 2 | 15 | 20.9697 | 14.73 |
| 38 | 40.23 | 42.26 | 57.4 CDK4_FlexII | 99.0 YEPVAEIGVGAGTVYK               | Label:13C(6)15N(2)(K)@17                                                                      |               | -0.00024234 | 1822.9231  | 912.4688 | 1822.92322 | 912.468933 | 2 | 15 | 21.6107 | 14.73 |
| 38 | 40.23 | 42.26 | 57.4 CDK4_FlexII | 99.0 YEPVAEIGVGAGTVYK               | Label:13C(6)15N(2)(K)@17                                                                      |               | 0.00073771  | 1822.92407 | 608.6486 | 1822.92322 | 608.648377 | 3 | 15 | 26.5299 | 14.73 |
| 38 | 40.23 | 42.26 | 57.4 CDK4_FlexII | 99.0 YEPVAEIGVGAGTVYK               | Label:13C(6)15N(2)(K)@17                                                                      |               | -0.0243477  | 1822.89917 | 608.6403 | 1822.92322 | 608.648377 | 3 | 13 | 18.8442 | 14.73 |
| 38 | 40.23 | 42.2  |                  |                                     |                                                                                               |               |             |            |          |            |            |   |    |         |       |

|    |       |       |      |               |      |                                |                                                                                                                                      |                             |             |            |          |            |            |   |    |         |      |
|----|-------|-------|------|---------------|------|--------------------------------|--------------------------------------------------------------------------------------------------------------------------------------|-----------------------------|-------------|------------|----------|------------|------------|---|----|---------|------|
| 39 | 39.97 | 42    | 41.5 | SOCSS_FlexIII | 99.0 | EKNISIGDSTPQQQSSPLR            | Label:13C(6)15N(2)(K)@2; Deamidated(Q)@13; Label:13C(6)15N(4)(R)@19                                                                  | missed K-N@2                | 0.00835233  | 2103.0647  | 702.0288 | 2103.0564  | 702.026062 | 3 | 12 | 15.7381 | 1.66 |
| 39 | 39.97 | 42    | 41.5 | SOCSS_FlexIII | 99.0 | ENIALQLGLSPSK                  | Label:13C(6)15N(2)(K)@13                                                                                                             |                             | -0.0123316  | 1376.76331 | 689.3899 | 1376.77551 | 689.39502  | 2 | 15 | 18.3551 | 1.66 |
| 39 | 39.97 | 42    | 41.5 | SOCSS_FlexIII | 99.0 | IHLSELMLEK                     | Label:13C(6)15N(2)(K)@10                                                                                                             |                             | -0.00893007 | 1219.6637  | 610.8391 | 1219.67261 | 610.843567 | 2 | 13 | 17.853  | 1.66 |
| 39 | 39.97 | 42    | 41.5 | SOCSS_FlexIII | 99.0 | KIHLSELMLEK                    | Label:13C(6)15N(2)(K)@1; Label:13C(6)15N(2)(K)@11                                                                                    | missed K-I@1                | -0.00013946 | 1355.78174 | 452.9345 | 1355.78174 | 452.93454  | 3 | 13 | 17.1953 | 1.66 |
| 39 | 39.97 | 42    | 41.5 | SOCSS_FlexIII | 99.0 | LQDVTGLGCFPMR                  | Propionamide(C)@8; Label:13C(6)15N(4)(R)@12                                                                                          |                             | -0.00309738 | 1459.71606 | 730.8653 | 1459.71912 | 730.866821 | 2 | 14 | 18.9492 | 1.66 |
| 39 | 39.97 | 42    | 41.5 | SOCSS_FlexIII | 99.0 | LSIEEGVDPPNPAQHTEATAQVNPPLYK   | Label:13C(6)15N(2)(K)@29                                                                                                             |                             | -0.00309083 | 3185.60913 | 1062.877 | 3185.61255 | 1062.87805 | 3 | 17 | 18.5013 | 1.66 |
| 39 | 39.97 | 42    | 41.5 | SOCSS_FlexIII | 99.0 | NISIGDSTPQQQSSPLR              | Label:13C(6)15N(4)(R)@17                                                                                                             |                             | 0.00109536  | 1836.92163 | 919.4681 | 1836.92053 | 919.467529 | 2 | 20 | 16.5157 | 1.66 |
| 39 | 39.97 | 42    | 41.5 | SOCSS_FlexIII | 99.0 | QISGDSTHTVHSR                  | Gln->pyro-Glu@N-term; Label:13C(6)15N(4)(R)@12                                                                                       |                             | 0.00887895  | 1315.62329 | 658.8189 | 1315.6145  | 658.814514 | 2 | 17 | 13.5217 | 1.66 |
| 39 | 39.97 | 42    | 41.5 | SOCSS_FlexIII | 99.0 | QSKPLFSNKR                     | Gln->pyro-Glu@N-term; Label:13C(6)15N(2)(K)@3; Label:13C(6)15N(2)(K)@9; Label:13C(6)15N(4)(R)@10                                     | missed K-R@9                | -0.00168552 | 1212.68079 | 405.2342 | 1212.6825  | 405.234772 | 3 | 11 | 14.8517 | 1.66 |
| 39 | 39.97 | 42    | 41.5 | SOCSS_FlexIII | 99.0 | RLSIEEGVDPPNPAQHTEATAQVNPPLYK  | Label:13C(6)15N(4)(R)@1; Label:13C(6)15N(2)(K)@30                                                                                    | missed R-L@1                | 0.00254978  | 3351.72461 | 838.9384 | 3351.72192 | 838.937744 | 4 | 17 | 18.1977 | 1.66 |
| 39 | 39.97 | 42    | 41.5 | SOCSS_FlexIII | 99.0 | RNQNCAITEIQIVEISIEKDNDSCVTPGTR | Label:13C(6)15N(4)(R)@1; Propionamide(C)@5; Label:13C(6)15N(2)(K)@19; Propionamide(C)@24; Label:13C(6)15N(4)(R)@30                   | missed R-N@1; missed K-D@19 | -0.0190968  | 3499.68394 | 875.9282 | 3499.70288 | 875.933044 | 4 | 20 | 18.4785 | 1.66 |
| 39 | 39.97 | 42    | 41.5 | SOCSS_FlexIII | 99.0 | RYGVSSVHMDMSVSSR               | Label:13C(6)15N(4)(R)@1; Label:13C(6)15N(4)(R)@16                                                                                    | missed R-Y@1                | 0.00899226  | 1800.84192 | 901.4282 | 1800.83276 | 901.423645 | 2 | 16 | 15.0371 | 1.66 |
| 39 | 39.97 | 42    | 41.5 | SOCSS_FlexIII | 99.0 | WLEREPVK                       | Label:13C(6)15N(4)(R)@4; Label:13C(6)15N(2)(K)@8                                                                                     | missed R-E@4                | -0.00040034 | 1073.59851 | 537.8065 | 1073.59888 | 537.806702 | 2 | 11 | 15.2426 | 1.66 |
| 39 | 39.97 | 42    | 41.5 | SOCSS_FlexIII | 99.0 | YEAEALLEGKPEGTFLLR             | Label:13C(6)15N(2)(K)@10; Label:13C(6)15N(4)(R)@18                                                                                   |                             | -0.00037463 | 2053.08447 | 685.3688 | 2053.08496 | 685.368958 | 3 | 12 | 18.8152 | 1.66 |
| 39 | 39.97 | 42    | 41.5 | SOCSS_FlexIII | 99.0 | YGVSSVHMDMSVSSR                | Label:13C(6)15N(4)(R)@15                                                                                                             |                             | -0.00171312 | 1634.72168 | 818.3681 | 1634.72339 | 818.368958 | 2 | 20 | 15.4953 | 1.66 |
| 39 | 39.97 | 42    | 41.5 | SOCSS_FlexIII | 99.0 | IHLSELMLEK                     | Label:13C(6)15N(2)(K)@10                                                                                                             |                             | 0.0147526   | 1219.68276 | 407.5697 | 1219.67261 | 407.564819 | 3 | 11 | 17.8263 | 1.66 |
| 39 | 39.97 | 42    | 41.5 | SOCSS_FlexIII | 99.0 | LQDVTGLGCFPMR                  | Deamidated(Q)@2; Propionamide(C)@8; Label:13C(6)15N(4)(R)@12                                                                         |                             | 0.0197198   | 1460.7229  | 731.3687 | 1460.70313 | 731.358826 | 2 | 10 | 18.6879 | 1.66 |
| 39 | 39.97 | 42    | 41.5 | SOCSS_FlexIII | 99.0 | QISGDSTHTVHSR                  | Gln->pyro-Glu@N-term; Label:13C(6)15N(4)(R)@12                                                                                       |                             | 0.0125422   | 1315.62695 | 439.5496 | 1315.6145  | 439.54541  | 3 | 11 | 13.4911 | 1.66 |
| 39 | 39.97 | 42    | 41.5 | SOCSS_FlexIII | 99.0 | RNQNCAITEIQIVEISIEKDNDSCVTPGTR | Label:13C(6)15N(4)(R)@1; Propionamide(C)@5; Deamidated(Q)@11; Label:13C(6)15N(2)(K)@19; Propionamide(C)@24; Label:13C(6)15N(4)(R)@10 | missed R-N@1; missed K-D@19 | 0.0133017   | 3500.69922 | 1167.907 | 3500.68701 | 1167.90295 | 3 | 19 | 18.5615 | 1.66 |
| 39 | 39.97 | 42    | 41.5 | SOCSS_FlexIII | 99.0 | RYGVSSVHMDMSVSSR               | Label:13C(6)15N(4)(R)@1; Label:13C(6)15N(4)(R)@16                                                                                    | missed R-Y@1                | 0.0164408   | 1800.84937 | 451.2196 | 1800.83276 | 451.215485 | 4 | 14 | 15.0096 | 1.66 |
| 39 | 39.97 | 42    | 41.5 | SOCSS_FlexIII | 99.0 | RYGVSSVHMDMSVSSR               | Label:13C(6)15N(4)(R)@1; Label:13C(6)15N(4)(R)@16                                                                                    | missed R-Y@1                | -0.0019929  | 1800.83069 | 601.2842 | 1800.83276 | 601.284951 | 3 | 12 | 14.9818 | 1.66 |
| 39 | 39.97 | 42    | 41.5 | SOCSS_FlexIII | 99.0 | YGVSSVHMDMSVSSR                | Label:13C(6)15N(4)(R)@15                                                                                                             |                             | 0.00030218  | 1634.72388 | 545.9152 | 1634.72339 | 545.9151   | 3 | 15 | 15.5137 | 1.66 |
| 39 | 39.97 | 42    | 41.5 | SOCSS_FlexIII | 99.0 | YPTFLYK                        | Label:13C(6)15N(2)(K)@7                                                                                                              |                             | -0.00165037 | 938.497681 | 470.2561 | 938.499329 | 470.256928 | 2 | 9  | 18.0092 | 1.66 |
| 39 | 39.97 | 42    | 41.5 | SOCSS_FlexIII | 99.0 | YPTFLYK                        | Label:13C(6)15N(2)(K)@7                                                                                                              |                             | 0.00020099  | 938.499451 | 470.257  | 938.499329 | 470.256928 | 2 | 9  | 17.9008 | 1.66 |
| 39 | 39.97 | 42    | 41.5 | SOCSS_FlexIII | 99.0 | YPTFLYK                        | Label:13C(6)15N(2)(K)@7                                                                                                              |                             | -0.00091407 | 938.498474 | 470.2565 | 938.499329 | 470.256928 | 2 | 9  | 17.7612 | 1.66 |
| 40 | 39.12 | 41.12 | 63.3 | VASP_FlexIII  | 99.0 | ATQVGKTKPDESANQEEPEAR          | Label:13C(6)15N(2)(K)@7; Label:13C(6)15N(2)(K)@10; Label:13C(6)15N(4)(R)@22                                                          | missed K-T@7; missed K-D@10 | -0.00034236 | 2439.17212 | 610.8003 | 2439.17236 | 610.800354 | 4 | 11 | 13.4485 | 4.96 |
| 40 | 39.12 | 41.12 | 63.3 | VASP_FlexIII  | 99.0 | ATVMLYDDGNKR                   | Label:13C(6)15N(2)(K)@11; Label:13C(6)15N(4)(R)@12                                                                                   | missed K-R@11               | -0.00214138 | 1399.68652 | 700.8505 | 1399.68848 | 700.851502 | 2 | 12 | 15.6214 | 4.96 |
| 40 | 39.12 | 41.12 | 63.3 | VASP_FlexIII  | 99.0 | DESANQEEPEAR                   | Label:13C(6)15N(2)(K)@1; Label:13C(6)15N(2)(K)@4; Label:13C(6)15N(2)(K)@16                                                           | missed K-M@1                | -0.0032325  | 1373.56628 | 687.7904 | 1373.56946 | 687.792053 | 2 | 11 | 10.9375 | 4.96 |
| 40 | 39.12 | 41.12 | 63.3 | VASP_FlexIII  | 99.0 | KMQPDQQVVINCAIVR               | Label:13C(6)15N(2)(K)@1; Label:13C(6)15N(2)(K)@4; Label:13C(6)15N(2)(K)@16                                                           | missed K-V@1; missed K-Q@4  | -0.00078555 | 1930.02393 | 966.0192 | 1930.02478 | 966.019653 | 2 | 20 | 17.0239 | 4.96 |
| 40 | 39.12 | 41.12 | 63.3 | VASP_FlexIII  | 99.0 | KYSKQEEASGGTPAPK               | Label:13C(6)15N(2)(K)@11; Label:13C(6)15N(4)(R)@15                                                                                   |                             | 0.0141233   | 1636.8988  | 546.6402 | 1636.88464 | 546.635498 | 3 | 17 | 8.2847  | 4.96 |
| 40 | 39.12 | 41.12 | 63.3 | VASP_FlexIII  | 99.0 | MQPDQQVVINCAIVR                | Gln->pyro-Glu@N-term; Label:13C(6)15N(2)(K)@12                                                                                       |                             | -0.00844676 | 1793.9071  | 897.9608 | 1793.91553 | 897.960508 | 2 | 15 | 17.6828 | 4.96 |
| 40 | 39.12 | 41.12 | 63.3 | VASP_FlexIII  | 99.0 | QEEASGGTPAPK                   | Gln->pyro-Glu@N-term; Label:13C(6)15N(2)(K)@12                                                                                       |                             | 0.00020211  | 1161.53943 | 581.777  | 1161.53931 | 581.776917 | 2 | 14 | 14.1715 | 4.96 |
| 40 | 39.12 | 41.12 | 63.3 | VASP_FlexIII  | 99.0 | QQPGPSEHIER                    | Gln->pyro-Glu@N-term; Label:13C(6)15N(4)(R)@11                                                                                       |                             | -0.00136348 | 1269.59644 | 635.8055 | 1269.59778 | 635.806152 | 2 | 15 | 14.7702 | 4.96 |
| 40 | 39.12 | 41.12 | 63.3 | VASP_FlexIII  | 99.0 | RQQPGPSEHIER                   | Label:13C(6)15N(4)(R)@1; Label:13C(6)15N(4)(R)@12                                                                                    | missed R-Q@1                | -0.0382277  | 1452.69544 | 485.2391 | 1452.73364 | 485.251831 | 3 | 13 | 12.6065 | 4.96 |
| 40 | 39.12 | 41.12 | 63.3 | VASP_FlexIII  | 99.0 | SGGGGLMEEMNAMLAR               | Label:13C(6)15N(4)(R)@16                                                                                                             |                             | 8.69E-05    | 1632.72986 | 817.3722 | 1632.72974 | 817.372131 | 2 | 18 | 20.1464 | 4.96 |
| 40 | 39.12 | 41.12 | 63.3 | VASP_FlexIII  | 99.0 | SSSSVTTSETQPTPSSSDYSDLQR       | Deamidated(Q)@11; Propionamide(C)@13; Label:13C(6)15N(4)(R)@25                                                                       |                             | 0.0245362   | 2731.18945 | 1366.602 | 2731.16431 | 1366.58936 | 2 | 20 | 15.8858 | 4.96 |
| 40 | 39.12 | 41.12 | 63.3 | VASP_FlexIII  | 99.0 | TPKDESANQEEPEAR                | Label:13C(6)15N(2)(K)@3; Label:13C(6)15N(4)(R)@15                                                                                    | missed K-D@3                | -0.00859053 | 1717.77881 | 573.6002 | 1717.78735 | 573.603088 | 3 | 16 | 10.6523 | 4.96 |
| 40 | 39.12 | 41.12 | 63.3 | VASP_FlexIII  | 99.0 | VKEEIEAFVQELR                  | Label:13C(6)15N(2)(K)@2; Label:13C(6)15N(4)(R)@14                                                                                    | missed K-E@2                | -0.00568953 | 1719.9469  | 860.9807 | 1719.95264 | 860.983582 | 2 | 20 | 20.0969 | 4.96 |
| 40 | 39.12 | 41.12 | 63.3 | VASP_FlexIII  | 99.0 | VKQELLEEVKK                    | Label:13C(6)15N(2)(K)@2; Label:13C(6)15N(2)(K)@10; Label:13C(6)15N(2)(K)@11                                                          | missed K-Q@2; missed K-K@10 | -0.0111312  | 1365.81812 | 456.28   | 1365.82335 | 456.283722 | 3 | 15 | 15.1626 | 4.96 |
| 40 | 39.12 | 41.12 | 63.3 | VASP_FlexIII  | 99.0 | VPAQSESVR                      | Label:13C(6)15N(4)(R)@9                                                                                                              |                             | -0.00044094 | 981.511475 | 491.763  | 981.511902 | 491.763214 | 2 | 11 | 11.0983 | 4.96 |
| 40 | 39.12 | 41.12 | 63.3 | VASP_FlexIII  | 99.0 | VQIYHNPTANSFR                  | Label:13C(6)15N(4)(R)@13                                                                                                             |                             | -0.0104078  | 1555.76672 | 778.8906 | 1555.7771  | 778.895813 | 2 | 18 | 15.9286 | 4.96 |
| 40 | 39.12 | 41.12 | 63.3 | VASP_FlexIII  | 99.0 | VSKQEEASGGTAPK                 | Label:13C(6)15N(2)(K)@3; Label:13C(6)15N(2)(K)@15                                                                                    | missed K-Q@3                | 5.34E-05    | 1500.77564 | 501.2658 | 1500.77551 | 501.265778 | 3 | 17 | 10.0365 | 4.96 |
| 40 | 39.12 | 41.12 | 63.3 | VASP_FlexIII  | 99.0 | WLPAGTGPQAFSR                  | Label:13C(6)15N(4)(R)@13                                                                                                             |                             | -0.00038123 | 1396.71252 | 699.3635 | 1396.71265 | 699.363648 | 2 | 12 | 18.0373 | 4.96 |
| 40 | 39.12 | 41.12 | 63.3 | VASP_FlexIII  | 99.0 | YNQATPNFHQWR                   | Label:13C(6)15N(4)(R)@12                                                                                                             |                             | 8.12E-05    | 1570.73047 | 524.5841 | 1570.73047 | 524.584106 | 3 | 11 | 16.4648 | 4.96 |
| 40 | 39.12 | 41.12 | 63.3 | VASP_FlexIII  | 99.0 | DESANQEEPEAR                   | Label:13C(6)15N(4)(R)@12                                                                                                             |                             | 0.00096789  | 1383.57861 | 692.7966 | 1383.57776 | 692.796143 | 2 | 16 | 10.9918 | 4.96 |
| 40 | 39.12 | 41.12 | 63.3 | VASP_FlexIII  | 99.0 | DESANQEEPEAR                   | Label:13C(6)15N(4)(R)@12                                                                                                             |                             | 0.00853626  | 1383.5863  | 692.8004 | 1383.57776 | 692.796143 | 2 | 10 | 10.7241 | 4.96 |
| 40 | 39.12 | 41.12 | 63.3 | VASP_FlexIII  | 99.0 | KMQPDQQVVINCAIVR               | Label:13C(6)15N(2)(K)@1; Propionamide(C)@12; Label:13C(6)15N(4)(R)@16                                                                | missed K-M@1                | -0.00050147 | 1930.02429 | 644.3487 | 1930.02478 | 644.348877 | 3 | 18 | 17.0185 | 4.96 |
| 40 | 39.12 | 41.12 | 63.3 | VASP_FlexIII  | 99.0 | KYSKQEEASGGTPAPK               | Label:13C(6)15N(2)(K)@1; Label:13C(6)15N(2)(K)@4; Label:13C(6)15N(2)(K)@16                                                           | missed K-V@1; missed K-Q@4  | 0.0141233   | 1636.8988  | 546.6402 | 1636.88464 | 546.635498 | 3 | 14 | 8.0236  | 4.96 |
| 40 | 39.12 | 41.12 | 63.3 | VASP_FlexIII  | 99.0 | KYSKQEEASGGTPAPK               | Label:13C(6)15N(2)(K)@1; Label:13C(6)15N(2)(K)@4; Label:13C(6)15N(2)(K)@16                                                           | missed K-V@1; missed K-Q@4  | 0.00604556  | 1636.8905  | 410.2299 | 1636.88464 | 410.228424 | 4 | 12 | 8.326   | 4.96 |
| 40 | 39.12 | 41.12 | 63.3 | VASP_FlexIII  | 99.0 | MQPDQQVVINCAIVR                | Propionamide(C)@11; Label:13C(6)15N(4)(R)@15                                                                                         |                             | -0.00193708 | 1793.9137  | 598.9785 | 1793.91553 | 598.979126 | 3 | 14 | 17.7346 | 4.96 |
| 40 | 39.12 | 41.12 | 63.3 | VASP_FlexIII  | 99.0 | QEEASGGTPAPK                   | Label:13C(6)15N(2)(K)@12                                                                                                             |                             | 5.10E-05    | 1178.56592 | 590.2902 | 1178.56592 | 590.290222 | 2 | 11 | 10.6458 | 4.96 |
| 40 | 39.12 | 41.12 | 63.3 | VASP_FlexIII  | 99.0 | QEEASGGTPAPK                   | Label:13C(6)15N(2)(K)@12                                                                                                             |                             | 0.00053925  | 1178.56653 | 590.2905 | 1178.56592 | 590.290222 | 2 | 12 | 10.375  | 4.96 |
| 40 | 39.12 | 41.12 | 63.3 | VASP_FlexIII  | 99.0 | QEEASGGTPAPK                   | Label:13C(6)15N(2)(K)@12                                                                                                             |                             | 5.10E-05    | 1178.56592 | 590.2902 | 1178.56592 | 590.290222 | 2 | 8  | 10.1148 | 4.96 |
| 40 | 39.12 | 41.12 | 63.3 | VASP_FlexIII  | 99.0 | QQPGPSEHIER                    | Gln->pyro-Glu@N-term; Label:13C(6)15N(4)(R)@11                                                                                       |                             | -0.00136348 | 1269.59644 | 635.8055 | 1269.59778 | 635.806152 | 2 | 14 | 15.5112 | 4.96 |
| 40 | 39.12 | 41.12 | 63.3 | VASP_FlexIII  | 99.0 | QQPGPSEHIER                    | Label:13C(6)15N(4)(R)@11                                                                                                             |                             | -0.00017184 | 1286.62402 | 644.3193 | 1286.62427 | 644.319397 | 2 | 11 | 13.6134 | 4.96 |
| 40 | 39.12 | 41.12 | 63.3 | VASP_FlexIII  | 99.0 |                                |                                                                                                                                      |                             |             |            |          |            |            |   |    |         |      |

|    |       |       |                    |                                                  |                                                                                                                   |                      |             |            |          |            |            |   |    |         |       |
|----|-------|-------|--------------------|--------------------------------------------------|-------------------------------------------------------------------------------------------------------------------|----------------------|-------------|------------|----------|------------|------------|---|----|---------|-------|
| 40 | 39.12 | 41.12 | 63.3 VASP_FlexIII  | 99.0 TPKDESANQEEPEAR                             | Label: 13C(6)15N(2)(K) @ 3; Label: 13C(6)15N(4)(R) @ 15                                                           | missed K-D @ 3       | -0.00859053 | 1717.77881 | 573.6002 | 1717.78735 | 573.603088 | 3 | 15 | 10.9157 | 4.96  |
| 40 | 39.12 | 41.12 | 63.3 VASP_FlexIII  | 99.0 TPKDESANQEEPEAR                             | Label: 13C(6)15N(2)(K) @ 3; Deamidated(N) @ 8; Label: 13C(6)15N(4)(R) @ 15                                        | missed K-D @ 3       | -0.00255305 | 1718.76868 | 573.9302 | 1718.77136 | 573.931091 | 3 | 14 | 10.1323 | 4.96  |
| 40 | 39.12 | 41.12 | 63.3 VASP_FlexIII  | 99.0 TPKDESANQEEPEAR                             | Label: 13C(6)15N(2)(K) @ 3; Deamidated(N) @ 8; Label: 13C(6)15N(4)(R) @ 15                                        | missed K-D @ 3       | -0.00255305 | 1718.76868 | 573.9302 | 1718.77136 | 573.931091 | 3 | 11 | 9.8601  | 4.96  |
| 40 | 39.12 | 41.12 | 63.3 VASP_FlexIII  | 99.0 VKEEIEAFVQELR                               | Label: 13C(6)15N(2)(K) @ 2; Label: 13C(6)15N(4)(R) @ 14                                                           | missed K-E @ 2       | 0.0163231   | 1719.96912 | 574.3303 | 1719.95264 | 574.324829 | 3 | 17 | 20.0642 | 4.96  |
| 40 | 39.12 | 41.12 | 63.3 VASP_FlexIII  | 99.0 VQIYHNPTANSFR                               | Label: 13C(6)15N(4)(R) @ 13                                                                                       |                      | 0.00141199  | 1555.77844 | 519.6001 | 1555.7771  | 519.59867  | 3 | 13 | 15.9032 | 4.96  |
| 40 | 39.12 | 41.12 | 63.3 VASP_FlexIII  | 99.0 VQIYHNPTANSFR                               | Label: 13C(6)15N(4)(R) @ 13                                                                                       |                      | -0.0015177  | 1555.77551 | 519.5991 | 1555.7771  | 519.59867  | 3 | 13 | 16.1702 | 4.96  |
| 40 | 39.12 | 41.12 | 63.3 VASP_FlexIII  | 99.0 VSKQEEASGGPTAPK                             | Label: 13C(6)15N(2)(K) @ 3; Label: 13C(6)15N(2)(K) @ 15                                                           | missed K-Q @ 3       | 0.00041961  | 1500.77588 | 501.2659 | 1500.77551 | 501.265778 | 3 | 17 | 9.7817  | 4.96  |
| 40 | 39.12 | 41.12 | 63.3 VASP_FlexIII  | 99.0 VSKQEEASGGPTAPK                             | Label: 13C(6)15N(2)(K) @ 3; Label: 13C(6)15N(2)(K) @ 15                                                           | missed K-Q @ 3       | 0.00123416  | 1500.77673 | 751.3956 | 1500.77551 | 751.39502  | 2 | 18 | 9.8317  | 4.96  |
| 40 | 39.12 | 41.12 | 63.3 VASP_FlexIII  | 99.0 VSKQEEASGGPTAPK                             | Label: 13C(6)15N(2)(K) @ 3; Label: 13C(6)15N(2)(K) @ 15                                                           | missed K-Q @ 3       | 0.00111209  | 1500.77673 | 751.3956 | 1500.77551 | 751.39502  | 2 | 18 | 10.1017 | 4.96  |
| 40 | 39.12 | 41.12 | 63.3 VASP_FlexIII  | 99.0 VSKQEEASGGPTAPK                             | Label: 13C(6)15N(2)(K) @ 3; Label: 13C(6)15N(2)(K) @ 15                                                           | missed K-Q @ 3       | 0.00069427  | 1500.77612 | 501.266  | 1500.77551 | 501.265778 | 3 | 17 | 10.3097 | 4.96  |
| 40 | 39.12 | 41.12 | 63.3 VASP_FlexIII  | 99.0 VSKQEEASGGPTAPK                             | Label: 13C(6)15N(2)(K) @ 3; Label: 13C(6)15N(2)(K) @ 15                                                           | missed K-Q @ 3       | 0.00069427  | 1500.77612 | 501.266  | 1500.77551 | 501.265778 | 3 | 16 | 10.5728 | 4.96  |
| 40 | 39.12 | 41.12 | 63.3 VASP_FlexIII  | 99.0 VSKQEEASGGPTAPK                             | Label: 13C(6)15N(2)(K) @ 3; Deamidated(Q) @ 4; Label: 13C(6)15N(2)(K) @ 15                                        | missed K-Q @ 3       | -0.0110295  | 1501.74841 | 501.5901 | 1501.75952 | 501.593781 | 3 | 15 | 11.118  | 4.96  |
| 40 | 39.12 | 41.12 | 63.3 VASP_FlexIII  | 99.0 VSKQEEASGGPTAPK                             | Label: 13C(6)15N(2)(K) @ 3; Label: 13C(6)15N(2)(K) @ 15                                                           | missed K-Q @ 3       | -0.0088977  | 1500.76672 | 751.3906 | 1500.77551 | 751.39502  | 2 | 9  | 10.3597 | 4.96  |
| 40 | 39.12 | 41.12 | 63.3 VASP_FlexIII  | 99.0 VSKQEEASGGPTAPK                             | Label: 13C(6)15N(2)(K) @ 3; Label: 13C(6)15N(2)(K) @ 15                                                           | missed K-Q @ 3       | 0.0129624   | 1500.78845 | 501.2701 | 1500.77551 | 501.265778 | 3 | 9  | 10.846  | 4.96  |
| 40 | 39.12 | 41.12 | 63.3 VASP_FlexIII  | 99.0 WLPAGTGPQAFSR                               | Label: 13C(6)15N(4)(R) @ 13                                                                                       |                      | 0.0007174   | 1396.7135  | 699.364  | 1396.71265 | 699.363648 | 2 | 11 | 17.7617 | 4.96  |
| 40 | 39.12 | 41.12 | 63.3 VASP_FlexIII  | 99.0 YPTFLYK                                     | Label: 13C(6)15N(2)(K) @ 7                                                                                        | cleaved P-Y @ N-term | -0.00165037 | 938.497681 | 470.2561 | 938.499329 | 470.256928 | 2 | 9  | 18.0092 | 4.96  |
| 40 | 39.12 | 41.12 | 63.3 VASP_FlexIII  | 99.0 YPTFLYK                                     | Label: 13C(6)15N(2)(K) @ 7                                                                                        | cleaved P-Y @ N-term | 0.00020099  | 938.499451 | 470.257  | 938.499329 | 470.256928 | 2 | 9  | 17.9008 | 4.96  |
| 40 | 39.12 | 41.12 | 63.3 VASP_FlexIII  | 99.0 YPTFLYK                                     | Label: 13C(6)15N(2)(K) @ 7                                                                                        | cleaved P-Y @ N-term | -0.00091407 | 938.498474 | 470.2565 | 938.499329 | 470.256928 | 2 | 9  | 17.7612 | 4.96  |
| 41 | 38.89 | 40.91 | 49.1 CASP9_FlexIII | 99.0 DHGFEVASTSPEDSPGSNPEDATPFQOGLR              | Label: 13C(6)15N(4)(R) @ 32                                                                                       |                      | -0.00085497 | 3408.48828 | 1137.17  | 3408.48926 | 1137.17041 | 3 | 29 | 17.9141 | 23.69 |
| 41 | 38.89 | 40.91 | 49.1 CASP9_FlexIII | 99.0 ELFRPHMIDIQR                                | Label: 13C(6)15N(4)(R) @ 4; Label: 13C(6)15N(4)(R) @ 13                                                           |                      | -0.00495702 | 1702.8678  | 568.6299 | 1702.8728  | 568.631531 | 3 | 15 | 17.1704 | 23.69 |
| 41 | 38.89 | 40.91 | 49.1 CASP9_FlexIII | 99.0 FSSLHFMVEVK                                 | Label: 13C(6)15N(2)(K) @ 11                                                                                       |                      | 0.0038338   | 1330.68726 | 444.5697 | 1330.68347 | 444.568451 | 3 | 12 | 18.1683 | 23.69 |
| 41 | 38.89 | 40.91 | 49.1 CASP9_FlexIII | 99.0 GNADLAYLSMEPCGHCLINNWNFCR                   | Propionamide(C) @ 14; Propionamide(C) @ 17; Deamidated(N) @ 21; Propionamide(C) @ 26; Label: 13C(6)15N(4)(R) @ 27 |                      | 0.00177564  | 3203.4917  | 801.8802 | 3203.48999 | 801.879761 | 4 | 12 | 19.9342 | 23.69 |
| 41 | 38.89 | 40.91 | 49.1 CASP9_FlexIII | 99.0 GSQLALPLFISCLEDTGQDMLASFLR                  | Propionamide(C) @ 11; Deamidated(Q) @ 17; Label: 13C(6)15N(4)(R) @ 25                                             |                      | 0.0281703   | 2793.38745 | 1397.701 | 2793.35938 | 1397.68689 | 2 | 18 | 20.821  | 23.69 |
| 41 | 38.89 | 40.91 | 49.1 CASP9_FlexIII | 99.0 IVNIFNGTSCPSLGGKPK                          | Deamidated(N) @ 6; Propionamide(C) @ 10; Label: 13C(6)15N(2)(K) @ 16; Label: 13C(6)15N(2)(K) @ 18                 |                      | 0.00145966  | 1919.01721 | 640.6797 | 1919.01575 | 640.679199 | 3 | 16 | 17.9394 | 23.69 |
| 41 | 38.89 | 40.91 | 49.1 CASP9_FlexIII | 99.0 KPEVLRPTPRPVDIGSGGFGDVGALESLR               | Label: 13C(6)15N(2)(K) @ 1; Label: 13C(6)15N(4)(R) @ 6; Label: 13C(6)15N(4)(R) @ 11; Label: 13C(6)15N(4)(R) @ 30  |                      | -0.0149796  | 3185.69165 | 797.4302 | 3185.70679 | 797.43396  | 4 | 11 | 18.1429 | 23.69 |
| 41 | 38.89 | 40.91 | 49.1 CASP9_FlexIII | 99.0 LFFIQACGGEQK                                | Propionamide(C) @ 7; Label: 13C(6)15N(2)(K) @ 12                                                                  |                      | -0.00518521 | 1418.70544 | 710.36   | 1418.71082 | 710.362671 | 2 | 12 | 18.4402 | 23.69 |
| 41 | 38.89 | 40.91 | 49.1 CASP9_FlexIII | 99.0 LFFIQACGGEQKDHHGFEVASTSPEDSPGSNPEDATPFQOGLR | Propionamide(C) @ 7; Label: 13C(6)15N(2)(K) @ 12; Label: 13C(6)15N(4)(R) @ 44                                     | missed K-D @ 12      | -0.0149022  | 4809.17481 | 1203.301 | 4809.18945 | 1203.30469 | 4 | 15 | 18.8919 | 23.69 |
| 41 | 38.89 | 40.91 | 49.1 CASP9_FlexIII | 99.0 LRLVEELQVDQLWDALLSR                         | Label: 13C(6)15N(4)(R) @ 2; Label: 13C(6)15N(4)(R) @ 19                                                           | missed R-L @ 2       | 0.0135234   | 2315.28882 | 772.7702 | 2315.27515 | 772.765668 | 3 | 20 | 20.4459 | 23.69 |
| 41 | 38.89 | 40.91 | 49.1 CASP9_FlexIII | 99.0 LVEELQVDQLWDALLSR                           | Deamidated(Q) @ 6                                                                                                 |                      | 0.0289204   | 2027.08545 | 1014.55  | 2027.0575  | 1014.53601 | 2 | 16 | 20.5727 | 23.69 |
| 41 | 38.89 | 40.91 | 49.1 CASP9_FlexIII | 99.0 QLIDLETR                                    | Gln->pyro-Glu @ N-term; Label: 13C(6)15N(4)(R) @ 9                                                                |                      | -0.00114543 | 1092.60425 | 547.3094 | 1092.60547 | 547.309998 | 2 | 11 | 20.3573 | 23.69 |
| 41 | 38.89 | 40.91 | 49.1 CASP9_FlexIII | 99.0 QMPGCFNFLR                                  | Propionamide(C) @ 5; Label: 13C(6)15N(4)(R) @ 10                                                                  |                      | 0.00024979  | 1292.60364 | 647.3091 | 1292.60339 | 647.30896  | 2 | 10 | 19.1708 | 23.69 |
| 41 | 38.89 | 40.91 | 49.1 CASP9_FlexIII | 99.0 QMPGCFNFLRK                                 | Gln->pyro-Glu @ N-term; Propionamide(C) @ 5; Label: 13C(6)15N(4)(R) @ 10; Label: 13C(6)15N(2)(K) @ 11             | missed R-K @ 10      | -0.00138577 | 1411.68445 | 706.8495 | 1411.68591 | 706.850281 | 2 | 12 | 19.0285 | 23.69 |
| 41 | 38.89 | 40.91 | 49.1 CASP9_FlexIII | 99.0 TFDQLDLSLPTSPDISFYSTFPGFVSWRDPK             | Label: 13C(6)15N(4)(R) @ 31; Label: 13C(6)15N(2)(K) @ 34                                                          | missed R-D @ 31      | -0.00165482 | 3837.89136 | 960.4801 | 3837.88965 | 960.479675 | 4 | 13 | 20.4895 | 23.69 |
| 41 | 38.89 | 40.91 | 49.1 CASP9_FlexIII | 99.0 TGSNIDCEK                                   | Propionamide(C) @ 7; Label: 13C(6)15N(2)(K) @ 9                                                                   |                      | 0.00048364  | 1044.46326 | 523.2389 | 1044.46375 | 523.239136 | 2 | 11 | 9.6025  | 23.69 |
| 41 | 38.89 | 40.91 | 49.1 CASP9_FlexIII | 99.0 TGSNIDCEKLR                                 | Propionamide(C) @ 7; Label: 13C(6)15N(2)(K) @ 9; Label: 13C(6)15N(4)(R) @ 11                                      | missed K-L @ 9       | 0.0101607   | 1323.66724 | 442.2297 | 1323.65723 | 442.226318 | 3 | 10 | 14.3622 | 23.69 |
| 41 | 38.89 | 40.91 | 49.1 CASP9_FlexIII | 99.0 TRTGSNIDCEK                                 | Label: 13C(6)15N(4)(R) @ 2; Propionamide(C) @ 9; Label: 13C(6)15N(2)(K) @ 11                                      | missed R-T @ 2       | -0.00181055 | 1311.6189  | 438.2136 | 1311.62073 | 438.214203 | 3 | 8  | 8.6573  | 23.69 |
| 41 | 38.89 | 40.91 | 49.1 CASP9_FlexIII | 99.0 TSYPTFLYK                                   | Label: 13C(6)15N(2)(K) @ 9                                                                                        |                      | -0.00115442 | 1126.57788 | 564.2962 | 1126.57898 | 564.296753 | 2 | 9  | 18.1582 | 23.69 |
| 41 | 38.89 | 40.91 | 49.1 CASP9_FlexIII | 99.0 DHGFEVASTSPEDSPGSNPEDATPFQOGLR              | Deamidated(N) @ 19; Label: 13C(6)15N(4)(R) @ 32                                                                   |                      | 0.00683006  | 3409.4812  | 1137.501 | 3409.47339 | 1137.49841 | 3 | 24 | 17.6476 | 23.69 |
| 41 | 38.89 | 40.91 | 49.1 CASP9_FlexIII | 99.0 DHGFEVASTSPEDSPGSNPEDATPFQOGLR              | Deamidated(N) @ 19; Label: 13C(6)15N(4)(R) @ 32                                                                   |                      | 0.0368594   | 3409.51123 | 1137.511 | 3409.47339 | 1137.49841 | 3 | 17 | 21.3727 | 23.69 |
| 41 | 38.89 | 40.91 | 49.1 CASP9_FlexIII | 99.0 DHGFEVASTSPEDSPGSNPEDATPFQOGLR              | Deamidated(N) @ 19; Label: 13C(6)15N(4)(R) @ 32                                                                   |                      | 0.00683006  | 3409.4812  | 1137.501 | 3409.47339 | 1137.49841 | 3 | 6  | 22.5948 | 23.69 |
| 41 | 38.89 | 40.91 | 49.1 CASP9_FlexIII | 99.0 DHGFEVASTSPEDSPGSNPEDATPFQOGLR              | Label: 13C(6)15N(4)(R) @ 32                                                                                       |                      | 0.00097608  | 3408.49121 | 1137.171 | 3408.48926 | 1137.17041 | 3 | 6  | 22.2332 | 23.69 |
| 41 | 38.89 | 40.91 | 49.1 CASP9_FlexIII | 99.0 ELFRPHMIDIQR                                | Label: 13C(6)15N(4)(R) @ 4; Label: 13C(6)15N(4)(R) @ 13                                                           |                      | 0.00322937  | 1702.8761  | 852.4453 | 1702.8728  | 852.443665 | 2 | 18 | 16.9964 | 23.69 |
| 41 | 38.89 | 40.91 | 49.1 CASP9_FlexIII | 99.0 ELFRPHMIDIQR                                | Label: 13C(6)15N(4)(R) @ 4; Label: 13C(6)15N(4)(R) @ 13                                                           |                      | -0.00153138 | 1702.87122 | 852.4429 | 1702.8728  | 852.443665 | 2 | 18 | 17.2641 | 23.69 |
| 41 | 38.89 | 40.91 | 49.1 CASP9_FlexIII | 99.0 ELFRPHMIDIQR                                | Label: 13C(6)15N(4)(R) @ 4; Deamidated(Q) @ 12; Label: 13C(6)15N(4)(R) @ 13                                       |                      | -0.00020168 | 1703.85657 | 568.9595 | 1703.85681 | 568.959534 | 3 | 12 | 17.4401 | 23.69 |
| 41 | 38.89 | 40.91 | 49.1 CASP9_FlexIII | 99.0 IVNIFNGTSCPSLGGKPK                          | Deamidated(N) @ 6; Propionamide(C) @ 10; Label: 13C(6)15N(2)(K) @ 16; Label: 13C(6)15N(2)(K) @ 18                 |                      | 0.0027414   | 1919.01856 | 640.6801 | 1919.01575 | 640.679199 | 3 | 17 | 17.6747 | 23.69 |
| 41 | 38.89 | 40.91 | 49.1 CASP9_FlexIII | 99.0 IVNIFNGTSCPSLGGKPK                          | Deamidated(N) @ 6; Propionamide(C) @ 10; Label: 13C(6)15N(2)(K) @ 16; Label: 13C(6)15N(2)(K) @ 18                 |                      | 0.0106226   | 1919.02625 | 960.5204 | 1919.01575 | 960.515137 | 2 | 19 | 17.6853 | 23.69 |
| 41 | 38.89 | 40.91 | 49.1 CASP9_FlexIII | 99.0 IVNIFNGTSCPSLGGKPK                          | Deamidated(N) @ 6; Propionamide(C) @ 10; Label: 13C(6)15N(2)(K) @ 16; Label: 13C(6)15N(2)(K) @ 18                 |                      | 0.0106226   | 1919.02625 | 960.5204 | 1919.01575 | 960.515137 | 2 | 18 | 17.9659 | 23.69 |
| 41 | 38.89 | 40.91 | 49.1 CASP9_FlexIII | 99.0 LFFIQACGGEQK                                | Propionamide(C) @ 7                                                                                               |                      | -0.011017   | 1410.68543 | 706.35   | 1410.69653 | 706.355591 | 2 | 11 | 18.5531 | 23.69 |
| 41 | 38.89 | 40.91 | 49.1 CASP9_FlexIII | 99.0 LFFIQACGGEQK                                | Propionamide(C) @ 7; Label: 13C(6)15N(2)(K) @ 12                                                                  |                      | -0.00518521 | 1418.70544 | 710.36   | 1418.71082 | 710.362671 | 2 | 9  | 21.5441 | 23.69 |
| 41 | 38.89 | 40.91 | 49.1 CASP9_FlexIII | 99.0 LRLVEELQVDQLWDALLSR                         | Label: 13C(6)15N(4)(R) @ 2; Deamidated(Q) @ 11; Label: 13C(6)15N(4)(R) @ 19                                       | missed R-L @ 2       | 0.0193774   | 2316.27881 | 773.1002 | 2316.25928 | 773.093689 | 3 | 14 | 26.5182 | 23.69 |
| 41 | 38.89 | 40.91 | 49.1 CASP9_FlexIII | 99.0 LVEELQVDQLWDALLSR                           | Label: 13C(6)15N(4)(R) @ 17                                                                                       |                      | 0.00467967  | 2036.08545 | 1019.05  | 2036.08179 | 1019.04816 | 2 | 23 | 20.4931 | 23.69 |
| 41 | 38.89 | 40.91 | 49.1 CASP9_FlexIII | 99.0 LVEELQVDQLWDALLSR                           | Deamidated(Q) @ 9; Label: 13C(6)15N(4)(R) @ 17                                                                    |                      | 0.0324376   | 2037.09815 | 680.04   | 2037.0658  | 680.029236 | 3 | 16 | 20.497  | 23.69 |
| 41 | 38.89 | 40.91 | 49.1 CASP9_FlexIII | 99.0 LVEELQVDQLWDALLSR                           | Deamidated(Q) @ 9; Label: 13C(6)15N(4)(R) @ 17                                                                    |                      | 0.0206655   | 2037.08545 | 1019.55  | 2037.0658  | 1019.54016 | 2 | 17 | 20.7674 | 23.69 |
| 41 | 38.89 | 40.91 | 49.1 CASP9_FlexIII | 99.0 LVEELQVDQLWDALLSR                           | Deamidated(Q) @ 9; Label: 13C(6)15N(4)(R) @ 17                                                                    |                      | 0.00259139  | 2037.06848 | 680.0301 | 2037.0658  | 680.029236 | 3 | 17 | 20.774  | 23.69 |
| 41 | 38.89 | 40.91 | 49.1 CASP9_FlexIII | 99.0 LVEELQVDQLWDALLSR                           | Deamidated(Q) @ 6; Label: 13C(6)15N(4)(R) @ 17                                                                    |                      | 0.0206655   | 2037.08545 | 1019.55  | 2037.0658  | 1019.54016 | 2 | 16 | 21.0245 | 23.69 |
| 41 | 38.89 | 40.91 | 49.1 CASP9_FlexIII | 99.0 LVEELQVDQLWDALLSR                           | Deamidated(Q) @ 6; Label: 13C(6)15N(4)(R) @ 17                                                                    |                      | 0.0206655   | 2037.08545 | 1019.55  | 2037       |            |   |    |         |       |

|    |       |       |                       |                                    |                                                                                                         |                                 |             |            |          |            |            |   |    |         |       |
|----|-------|-------|-----------------------|------------------------------------|---------------------------------------------------------------------------------------------------------|---------------------------------|-------------|------------|----------|------------|------------|---|----|---------|-------|
| 41 | 38.89 | 40.91 | 49.1 CASP9_FlexIII    | 99.0 TRTGSNIDCEK                   | Label: 13C(6)15N(4)(R) @ 2; Deamidated(N) @ 6; Propionamide(C) @ 9; Label: 13C(6)15N(2)(K) @ 11         | missed R-T @ 2                  | 0.0224456   | 1312.62732 | 438.5497 | 1312.60474 | 438.542206 | 3 | 8  | 8.9134  | 23.69 |
| 41 | 38.89 | 40.91 | 49.1 CASP9_FlexIII    | 99.0 TSYPTFLYK                     |                                                                                                         |                                 | -0.00198133 | 1118.56287 | 560.2887 | 1118.56482 | 560.289673 | 2 | 9  | 18.066  | 23.69 |
| 41 | 38.89 | 40.91 | 49.1 CASP9_FlexIII    | 99.0 YPTFLYK                       | Label: 13C(6)15N(2)(K) @ 7                                                                              | cleaved S-Y @ N-term            | -0.00165037 | 938.497681 | 470.2561 | 938.499329 | 470.256928 | 2 | 9  | 18.0092 | 23.69 |
| 41 | 38.89 | 40.91 | 49.1 CASP9_FlexIII    | 99.0 YPTFLYK                       | Label: 13C(6)15N(2)(K) @ 7                                                                              | cleaved S-Y @ N-term            | 0.00020099  | 938.499451 | 470.257  | 938.499329 | 470.256928 | 2 | 9  | 17.9008 | 23.69 |
| 41 | 38.89 | 40.91 | 49.1 CASP9_FlexIII    | 99.0 YPTFLYK                       | Label: 13C(6)15N(2)(K) @ 7                                                                              | cleaved S-Y @ N-term            | -0.00091407 | 938.498474 | 470.2565 | 938.499329 | 470.256928 | 2 | 9  | 17.7612 | 23.69 |
| 42 | 38.57 | 40.97 | 55.8 MAPKAPK3_FlexIII | 99.0 CLIIIMECEMGEGFLSR             | Propionamide(C) @ 1; Propionamide(C) @ 8; Label: 13C(6)15N(4)(R) @ 17                                   |                                 | 0.00016866  | 2094.98535 | 1048.5   | 2094.98486 | 1048.49976 | 2 | 18 | 20.5272 | 15.68 |
| 42 | 38.57 | 40.97 | 55.8 MAPKAPK3_FlexIII | 99.0 DIGTAIOFLHSHNIAHR             | Label: 13C(6)15N(4)(R) @ 17                                                                             |                                 | -0.00751402 | 1938.99756 | 647.3398 | 1939.00525 | 647.342346 | 3 | 15 | 18.3295 | 15.68 |
| 42 | 38.57 | 40.97 | 55.8 MAPKAPK3_FlexIII | 99.0 DVKPENLLYTSK                  | Label: 13C(6)15N(2)(K) @ 3; Label: 13C(6)15N(2)(K) @ 12                                                 |                                 | -0.0007638  | 1421.77295 | 474.9316 | 1421.77368 | 474.931854 | 3 | 13 | 16.9541 | 15.68 |
| 42 | 38.57 | 40.97 | 55.8 MAPKAPK3_FlexIII | 99.0 ETTQNALQTPCYTPYYVAPEVLGPEK    | Propionamide(C) @ 11; Label: 13C(6)15N(2)(K) @ 26                                                       |                                 | -0.0008695  | 2990.44531 | 997.8224 | 2990.44629 | 997.822693 | 3 | 20 | 18.7765 | 15.68 |
| 42 | 38.57 | 40.97 | 55.8 MAPKAPK3_FlexIII | 99.0 ETTQNALQTPCYTPYYVAPEVLGPEKYDK | Deamidated(Q) @ 8; Propionamide(C) @ 11; Label: 13C(6)15N(2)(K) @ 26; Label: 13C(6)15N(2)(K) @ 29       | missed K-Y @ 26                 | 0.00792261  | 3405.63818 | 1136.22  | 3405.62964 | 1136.21716 | 3 | 18 | 18.4622 | 15.68 |
| 42 | 38.57 | 40.97 | 55.8 MAPKAPK3_FlexIII | 99.0 GDOAFTEREAEEIMR               | Label: 13C(6)15N(4)(R) @ 8; Label: 13C(6)15N(4)(R) @ 15                                                 | missed R-E @ 8                  | 0.00090819  | 1742.82507 | 872.4198 | 1742.81604 | 872.415283 | 2 | 15 | 17.1893 | 15.68 |
| 42 | 38.57 | 40.97 | 55.8 MAPKAPK3_FlexIII | 99.0 IQERGDQAFTER                  | Label: 13C(6)15N(4)(R) @ 4; Label: 13C(6)15N(4)(R) @ 12                                                 | missed R-G @ 4                  | 0.00773296  | 1468.7251  | 735.3698 | 1468.71729 | 735.365967 | 2 | 18 | 14.5175 | 15.68 |
| 42 | 38.57 | 40.97 | 55.8 MAPKAPK3_FlexIII | 99.0 KYAVTDYQLSK                   | Label: 13C(6)15N(2)(K) @ 1; Label: 13C(6)15N(2)(K) @ 12                                                 | missed K-Y @ 1                  | -0.00099699 | 1445.73633 | 482.9194 | 1445.73731 | 482.919708 | 3 | 16 | 15.8402 | 15.68 |
| 42 | 38.57 | 40.97 | 55.8 MAPKAPK3_FlexIII | 99.0 LGQYGFNPPEWSEVEDAK            | Deamidated(Q) @ 3; Label: 13C(6)15N(2)(K) @ 19                                                          |                                 | 0.012026    | 2160.98535 | 1081.5   | 2160.97315 | 1081.4939  | 2 | 16 | 18.5697 | 15.68 |
| 42 | 38.57 | 40.97 | 55.8 MAPKAPK3_FlexIII | 99.0 LLLKTDPTR                     | Label: 13C(6)15N(2)(K) @ 4; Label: 13C(6)15N(4)(R) @ 10                                                 | missed K-T @ 4                  | -0.00075482 | 1202.69824 | 401.9067 | 1202.69898 | 401.906921 | 3 | 10 | 15.6851 | 15.68 |
| 42 | 38.57 | 40.97 | 55.8 MAPKAPK3_FlexIII | 99.0 LTTITQFMNHPWINGSMVVPQTPLHTAR  | Deamidated(N) @ 13; Label: 13C(6)15N(4)(R) @ 27                                                         |                                 | 0.0144406   | 3170.61816 | 1057.88  | 3170.60327 | 1057.875   | 3 | 16 | 19.4756 | 15.68 |
| 42 | 38.57 | 40.97 | 55.8 MAPKAPK3_FlexIII | 99.0 QAGSSASQGCNNQYPTFLYK          | Gln->pyro-Glu @ N-term; Propionamide(C) @ 11; Label: 13C(6)15N(2)(K) @ 21                               |                                 | -0.00629225 | 2312.01758 | 771.6798 | 2312.02588 | 771.682556 | 3 | 18 | 18.3847 | 15.68 |
| 42 | 38.57 | 40.97 | 55.8 MAPKAPK3_FlexIII | 99.0 VLQEDKDHWDVKEEMTSALATMR       | Label: 13C(6)15N(2)(K) @ 6; Label: 13C(6)15N(2)(K) @ 13; Label: 13C(6)15N(4)(R) @ 24                    | missed K-D @ 6; missed K-E @ 13 | -0.00870036 | 2886.36523 | 1444.19  | 2886.37378 | 1444.19421 | 2 | 28 | 19.0254 | 15.68 |
| 42 | 38.57 | 40.97 | 55.8 MAPKAPK3_FlexIII | 99.0 YAVTDDYQLSK                   | Label: 13C(6)15N(2)(K) @ 11                                                                             |                                 | -0.00062036 | 1309.62744 | 655.821  | 1309.62817 | 655.82135  | 2 | 12 | 16.3551 | 15.68 |
| 42 | 38.57 | 40.97 | 55.8 MAPKAPK3_FlexIII | 99.0 QVVLGLGVNGK                   | Deamidated(N) @ 8; Label: 13C(6)15N(2)(K) @ 10                                                          |                                 | -0.00056716 | 992.574097 | 497.2943 | 992.574585 | 497.294586 | 2 | 12 | 17.108  | 15.68 |
| 42 | 38.57 | 40.97 | 55.8 MAPKAPK3_FlexIII | 99.0 DIGTAIOFLHSHNIAHR             | Label: 13C(6)15N(4)(R) @ 17                                                                             |                                 | 3.09E-05    | 1939.00537 | 485.7586 | 1939.00525 | 485.758575 | 4 | 15 | 18.0507 | 15.68 |
| 42 | 38.57 | 40.97 | 55.8 MAPKAPK3_FlexIII | 99.0 DIGTAIOFLHSHNIAHR             |                                                                                                         |                                 | 0.0107026   | 1929.00769 | 644.0098 | 1928.99695 | 644.006226 | 3 | 14 | 18.1568 | 15.68 |
| 42 | 38.57 | 40.97 | 55.8 MAPKAPK3_FlexIII | 99.0 DIGTAIOFLHSHNIAHR             | Label: 13C(6)15N(4)(R) @ 17                                                                             |                                 | -0.00228842 | 1939.00293 | 485.758  | 1939.00525 | 485.758575 | 4 | 14 | 18.3282 | 15.68 |
| 42 | 38.57 | 40.97 | 55.8 MAPKAPK3_FlexIII | 99.0 DIGTAIOFLHSHNIAHR             | Label: 13C(6)15N(4)(R) @ 17                                                                             |                                 | 0.00733171  | 1939.0127  | 388.8098 | 1939.00525 | 388.808319 | 5 | 13 | 18.0916 | 15.68 |
| 42 | 38.57 | 40.97 | 55.8 MAPKAPK3_FlexIII | 99.0 DIGTAIOFLHSHNIAHR             | Deamidated(Q) @ 7; Label: 13C(6)15N(4)(R) @ 17                                                          |                                 | 0.028368    | 1940.01758 | 647.6798 | 1939.98926 | 647.670349 | 3 | 13 | 18.0539 | 15.68 |
| 42 | 38.57 | 40.97 | 55.8 MAPKAPK3_FlexIII | 99.0 DIGTAIOFLHSHNIAHR             | Deamidated(Q) @ 7; Label: 13C(6)15N(4)(R) @ 17                                                          |                                 | 0.0159402   | 1940.00513 | 971.0098 | 1939.98926 | 971.001892 | 2 | 13 | 18.3471 | 15.68 |
| 42 | 38.57 | 40.97 | 55.8 MAPKAPK3_FlexIII | 99.0 DIGTAIOFLHSHNIAHR             |                                                                                                         |                                 | -0.00244339 | 1928.99451 | 483.2559 | 1928.99695 | 483.2565   | 4 | 11 | 18.1505 | 15.68 |
| 42 | 38.57 | 40.97 | 55.8 MAPKAPK3_FlexIII | 99.0 DIGTAIOFLHSHNIAHR             | Label: 13C(6)15N(4)(R) @ 17                                                                             |                                 | 0.00845377  | 1939.01379 | 485.7607 | 1939.00525 | 485.758575 | 4 | 10 | 26.6146 | 15.68 |
| 42 | 38.57 | 40.97 | 55.8 MAPKAPK3_FlexIII | 99.0 DVKPENLLYTSK                  | Label: 13C(6)15N(2)(K) @ 3; Label: 13C(6)15N(2)(K) @ 12                                                 |                                 | -0.00101503 | 1421.77271 | 711.8936 | 1421.77368 | 711.894104 | 2 | 12 | 16.9767 | 15.68 |
| 42 | 38.57 | 40.97 | 55.8 MAPKAPK3_FlexIII | 99.0 DVKPENLLYTSK                  | Label: 13C(6)15N(2)(K) @ 3; Label: 13C(6)15N(2)(K) @ 12                                                 |                                 | -0.00616541 | 1421.76758 | 474.9298 | 1421.77368 | 474.931854 | 3 | 11 | 16.8808 | 15.68 |
| 42 | 38.57 | 40.97 | 55.8 MAPKAPK3_FlexIII | 99.0 ETTQNALQTPCYTPYYVAPEVLGPEKYDK | Deamidated(Q) @ 8; Propionamide(C) @ 11; Label: 13C(6)15N(2)(K) @ 26; Label: 13C(6)15N(2)(K) @ 29       | missed K-Y @ 26                 | 0.0204114   | 3405.65015 | 852.4198 | 3405.62964 | 852.414734 | 4 | 13 | 18.5476 | 15.68 |
| 42 | 38.57 | 40.97 | 55.8 MAPKAPK3_FlexIII | 99.0 IQERGDQAFTER                  | Label: 13C(6)15N(4)(R) @ 4; Label: 13C(6)15N(4)(R) @ 12                                                 | missed R-G @ 4                  | 0.00017169  | 1468.71753 | 490.5798 | 1468.71729 | 490.579712 | 3 | 12 | 14.5158 | 15.68 |
| 42 | 38.57 | 40.97 | 55.8 MAPKAPK3_FlexIII | 99.0 KYAVTDYQLSK                   | Label: 13C(6)15N(2)(K) @ 1; Label: 13C(6)15N(2)(K) @ 12                                                 | missed K-Y @ 1                  | 0.00082698  | 1445.73804 | 723.8763 | 1445.73731 | 723.875916 | 2 | 20 | 15.5696 | 15.68 |
| 42 | 38.57 | 40.97 | 55.8 MAPKAPK3_FlexIII | 99.0 KYAVTDYQLSK                   | Label: 13C(6)15N(2)(K) @ 1; Label: 13C(6)15N(2)(K) @ 12                                                 | missed K-Y @ 1                  | -0.00088201 | 1445.73864 | 723.8755 | 1445.73731 | 723.875916 | 2 | 21 | 15.8414 | 15.68 |
| 42 | 38.57 | 40.97 | 55.8 MAPKAPK3_FlexIII | 99.0 KYAVTDYQLSK                   | Label: 13C(6)15N(2)(K) @ 1; Label: 13C(6)15N(2)(K) @ 12                                                 | missed K-Y @ 1                  | 0.00028475  | 1445.73755 | 482.9198 | 1445.73731 | 482.919708 | 3 | 15 | 15.5662 | 15.68 |
| 42 | 38.57 | 40.97 | 55.8 MAPKAPK3_FlexIII | 99.0 LGQYGFNPPEWSEVEDAK            | Deamidated(N) @ 8; Label: 13C(6)15N(2)(K) @ 19                                                          |                                 | 0.0245758   | 2160.99756 | 721.3398 | 2160.97315 | 721.331665 | 3 | 15 | 18.6661 | 15.68 |
| 42 | 38.57 | 40.97 | 55.8 MAPKAPK3_FlexIII | 99.0 LTTITQFMNHPWINGSMVVPQTPLHTAR  | Label: 13C(6)15N(4)(R) @ 27                                                                             |                                 | -0.00919675 | 3169.61011 | 793.4098 | 3169.61939 | 793.412109 | 4 | 14 | 19.4335 | 15.68 |
| 42 | 38.57 | 40.97 | 55.8 MAPKAPK3_FlexIII | 99.0 LTTITQFMNHPWINGSMVVPQTPLHTAR  | Label: 13C(6)15N(4)(R) @ 27                                                                             |                                 | -0.00382566 | 3169.61523 | 793.4111 | 3169.61939 | 793.412109 | 4 | 13 | 19.6951 | 15.68 |
| 42 | 38.57 | 40.97 | 55.8 MAPKAPK3_FlexIII | 99.0 QAGSSASQGCNNQYPTFLYK          | Deamidated(Q) @ 9; Propionamide(C) @ 11; Label: 13C(6)15N(2)(K) @ 21                                    |                                 | 0.0111742   | 2330.04761 | 777.6898 | 2330.03638 | 777.686096 | 3 | 18 | 17.7343 | 15.68 |
| 42 | 38.57 | 40.97 | 55.8 MAPKAPK3_FlexIII | 99.0 QAGSSASQGCNNQYPTFLYK          | Propionamide(C) @ 11; Label: 13C(6)15N(2)(K) @ 21                                                       |                                 | 0.00058417  | 2329.05347 | 1165.534 | 2329.05249 | 1165.53345 | 2 | 25 | 17.7366 | 15.68 |
| 42 | 38.57 | 40.97 | 55.8 MAPKAPK3_FlexIII | 99.0 QAGSSASQGCNNQYPTFLYK          | Gln->pyro-Glu @ N-term; Propionamide(C) @ 11; Label: 13C(6)15N(2)(K) @ 21                               |                                 | -0.00070046 | 2312.02539 | 1157.02  | 2312.02588 | 1157.02026 | 2 | 21 | 18.4392 | 15.68 |
| 42 | 38.57 | 40.97 | 55.8 MAPKAPK3_FlexIII | 99.0 QVVLGLGVNGK                   | Label: 13C(6)15N(2)(K) @ 10                                                                             |                                 | -0.00196428 | 991.588684 | 496.8016 | 991.590576 | 496.802551 | 2 | 10 | 16.5464 | 15.68 |
| 42 | 38.57 | 40.97 | 55.8 MAPKAPK3_FlexIII | 99.0 VLQEDKDHWDVKEEMTSALATMR       | Label: 13C(6)15N(2)(K) @ 6; Label: 13C(6)15N(2)(K) @ 13; Label: 13C(6)15N(4)(R) @ 24                    | missed K-D @ 6; missed K-E @ 13 | -0.00609928 | 2886.36768 | 963.1298 | 2886.37378 | 963.131897 | 3 | 21 | 18.9471 | 15.68 |
| 42 | 38.57 | 40.97 | 55.8 MAPKAPK3_FlexIII | 99.0 VLQEDKDHWDVKEEMTSALATMR       | Label: 13C(6)15N(2)(K) @ 6; Label: 13C(6)15N(2)(K) @ 13; Label: 13C(6)15N(4)(R) @ 24                    | missed K-D @ 6; missed K-E @ 13 | 0.0006522   | 2886.37451 | 722.6009 | 2886.37378 | 722.600708 | 4 | 16 | 19.1733 | 15.68 |
| 42 | 38.57 | 40.97 | 55.8 MAPKAPK3_FlexIII | 99.0 VLQEDKDHWDVKEEMTSALATMR       | Label: 13C(6)15N(2)(K) @ 6; Label: 13C(6)15N(2)(K) @ 13; Label: 13C(6)15N(4)(R) @ 24                    | missed K-D @ 6; missed K-E @ 13 | -0.00609928 | 2886.36768 | 963.1298 | 2886.37378 | 963.131897 | 3 | 17 | 19.2236 | 15.68 |
| 42 | 38.57 | 40.97 | 55.8 MAPKAPK3_FlexIII | 99.0 VLQEDKDHWDVKEEMTSALATMR       | Label: 13C(6)15N(2)(K) @ 6; Label: 13C(6)15N(2)(K) @ 13; Label: 13C(6)15N(4)(R) @ 24                    | missed K-D @ 6; missed K-E @ 13 | -0.00374234 | 2886.37012 | 722.5998 | 2886.37378 | 722.600708 | 4 | 14 | 19.4443 | 15.68 |
| 42 | 38.57 | 40.97 | 55.8 MAPKAPK3_FlexIII | 99.0 VLQEDKDHWDVKEEMTSALATMR       | Label: 13C(6)15N(2)(K) @ 6; Label: 13C(6)15N(2)(K) @ 13; Label: 13C(6)15N(4)(R) @ 24                    | missed K-D @ 6; missed K-E @ 13 | -0.0110289  | 2886.36255 | 578.2798 | 2886.37378 | 578.282044 | 5 | 13 | 18.934  | 15.68 |
| 42 | 38.57 | 40.97 | 55.8 MAPKAPK3_FlexIII | 99.0 VLQEDKDHWDVKEEMTSALATMR       | Deamidated(Q) @ 3; Label: 13C(6)15N(2)(K) @ 6; Label: 13C(6)15N(2)(K) @ 13; Label: 13C(6)15N(4)(R) @ 24 | missed K-D @ 6; missed K-E @ 13 | 0.0122422   | 2887.37012 | 722.8498 | 2887.35791 | 722.846741 | 4 | 12 | 26.6234 | 15.68 |
| 42 | 38.57 | 40.97 | 55.8 MAPKAPK3_FlexIII | 99.0 VLQEDKDHWDVKEEMTSALATMR       | Deamidated(Q) @ 3; Label: 13C(6)15N(2)(K) @ 6; Label: 13C(6)15N(2)(K) @ 13; Label: 13C(6)15N(4)(R) @ 24 | missed K-D @ 6; missed K-E @ 13 | 0.0122422   | 2887.37012 | 722.8498 | 2887.35791 | 722.846741 | 4 | 12 | 18.9041 | 15.68 |
| 42 | 38.57 | 40.97 | 55.8 MAPKAPK3_FlexIII | 99.0 YPTFLYK                       | Label: 13C(6)15N(2)(K) @ 7                                                                              | cleaved Q-Y @ N-term            | -0.00165037 | 938.497681 | 470.2561 | 938.499329 | 470.256928 | 2 | 9  | 18.0092 | 15.68 |
| 42 | 38.57 | 40.97 | 55.8 MAPKAPK3_FlexIII | 99.0 YPTFLYK                       | Label: 13C(6)15N(2)(K) @ 7                                                                              | cleaved Q-Y @ N-term            | 0.00020099  | 938.499451 | 470.257  | 938.499329 | 470.256928 | 2 | 9  | 17.9008 | 15.68 |
| 42 | 38.57 | 40.97 | 55.8 MAPKAPK3_FlexIII | 99.0 YPTFLYK                       | Label: 13C(6)15N(2)(K) @ 7                                                                              | cleaved Q-Y @ N-term            | -0.00091407 | 938.498474 | 470.2565 | 938.499329 | 470.256928 | 2 | 9  | 17.7612 | 15.68 |
| 43 | 38.44 | 40.47 | 30.1 ARCP1B_FlexIII   | 99.0 ASSEGGTAAGALDSLHK             | Label: 13C(6)15N(2)(K) @ 18                                                                             |                                 | -0.00841679 | 1635.78613 | 818.9003 | 1635.79443 | 818.90048  | 2 | 20 | 15.2474 | 4.64  |
| 43 | 38.44 | 40.47 | 30.1 ARCP1B_FlexIII   | 99.0 CSQFCTTGMGDGMSIWDVK           | Propionamide(C) @ 1; Propionamide(C) @ 5; Label: 13C(6)15N(2)(K) @ 19                                   |                                 | -0.00281555 | 2214.92725 | 1108.471 | 2214.92699 | 1108.47217 | 2 | 19 | 19.3678 | 4.64  |
| 43 | 38.44 | 40.47 | 30.1 ARCP1B_FlexIII   | 99.0 DRTQIAICPNNHVEHVIYEK          | Label: 13C(6)15N(4)(R) @ 2; Propionamide(C) @ 8; Deamidated(N) @ 11; Label: 13C(6)15N(2)(K) @ 19        | missed R-T @ 2                  | 0.013351    | 2369.16895 | 790.7302 | 23         |            |   |    |         |       |

|    |       |       |      |               |      |                         |                                                                                                                          |                |             |            |          |            |            |   |    |         |      |
|----|-------|-------|------|---------------|------|-------------------------|--------------------------------------------------------------------------------------------------------------------------|----------------|-------------|------------|----------|------------|------------|---|----|---------|------|
| 43 | 38.44 | 40.47 | 30.1 | ARPC1B_FlexII | 99.0 | VISICYFEQENDWVWVK       | Propionamide(C) @5; Deamidated(Q) @9; Propionamide(C) @16; Label:13C(6)15N(2)(K) @17                                     |                | 0.0299455   | 2312.06738 | 1157.041 | 2312.03735 | 1157.02588 | 2 | 13 | 20.2049 | 4.64 |
| 43 | 38.44 | 40.47 | 30.1 | ARPC1B_FlexII | 99.0 | WAPNEKFAVGGSSR          | Label:13C(6)15N(2)(K) @7; Label:13C(6)15N(4)(R) @15                                                                      | missed K-F @7  | 0.00038518  | 1636.80811 | 819.4113 | 1636.80762 | 819.411133 | 2 | 11 | 16.0743 | 4.64 |
| 43 | 38.44 | 40.47 | 30.1 | ARPC1B_FlexII | 99.0 | ASSEGTAAGAGDLSLHK       | Label:13C(6)15N(2)(K) @18                                                                                                |                | -0.00700232 | 1635.78735 | 546.2697 | 1635.79443 | 546.272095 | 3 | 16 | 15.2414 | 4.64 |
| 43 | 38.44 | 40.47 | 30.1 | ARPC1B_FlexII | 99.0 | ASSEGTAAGAGDLSLHK       | Label:13C(6)15N(2)(K) @18                                                                                                |                | 0.00013881  | 1635.79443 | 546.2721 | 1635.79443 | 546.272095 | 3 | 15 | 15.5033 | 4.64 |
| 43 | 38.44 | 40.47 | 30.1 | ARPC1B_FlexII | 99.0 | CSQFCTTGMDDGMSIWDVK     | Propionamide(C) @1; Deamidated(Q) @3; Propionamide(C) @5; Label:13C(6)15N(2)(K) @19                                      |                | 0.0331903   | 2215.94727 | 1108.981 | 2215.91382 | 1108.96411 | 2 | 17 | 19.1041 | 4.64 |
| 43 | 38.44 | 40.47 | 30.1 | ARPC1B_FlexII | 99.0 | CSQFCTTGMDDGMSIWDVK     | Propionamide(C) @1; Propionamide(C) @5; Label:13C(6)15N(2)(K) @19                                                        |                | 0.00866974  | 2214.93848 | 739.3201 | 2214.92969 | 739.3172   | 3 | 16 | 19.1251 | 4.64 |
| 43 | 38.44 | 40.47 | 30.1 | ARPC1B_FlexII | 99.0 | IVTCGTDTR               | Propionamide(C) @4; Label:13C(6)15N(4)(R) @8                                                                             |                | 0.00209604  | 944.464661 | 473.2396 | 944.462463 | 473.238525 | 2 | 9  | 11.9342 | 4.64 |
| 43 | 38.44 | 40.47 | 30.1 | ARPC1B_FlexII | 99.0 | IVTCGTDTR               | Propionamide(C) @4; Label:13C(6)15N(4)(R) @8                                                                             |                | -0.00107779 | 944.461487 | 473.238  | 944.462463 | 473.238525 | 2 | 9  | 12.2033 | 4.64 |
| 43 | 38.44 | 40.47 | 30.1 | ARPC1B_FlexII | 99.0 | NSVSQISVLSGGK           | Deamidated(N) @1; Label:13C(6)15N(2)(K) @13                                                                              |                | 0.00395028  | 1283.6853  | 642.8499 | 1283.68127 | 642.8479   | 2 | 12 | 17.4161 | 4.64 |
| 43 | 38.44 | 40.47 | 30.1 | ARPC1B_FlexII | 99.0 | SLESALKDLK              | Label:13C(6)15N(2)(K) @7; Label:13C(6)15N(2)(K) @10                                                                      | missed K-D @7  | -0.00540838 | 1118.64636 | 373.8894 | 1118.65173 | 373.891205 | 3 | 11 | 17.6118 | 4.64 |
| 43 | 38.44 | 40.47 | 30.1 | ARPC1B_FlexII | 99.0 | STVLSLDWHNNVLLAAGSCDFK  | Deamidated(N) @12; Propionamide(C) @20; Label:13C(6)15N(2)(K) @23                                                        |                | 0.0373642   | 2566.29907 | 856.4403 | 2566.26172 | 856.427856 | 3 | 15 | 19.521  | 4.64 |
| 43 | 38.44 | 40.47 | 30.1 | ARPC1B_FlexII | 99.0 | TQIAICPNNHVHIYK         | Propionamide(C) @6; Label:13C(6)15N(2)(K) @17                                                                            |                | 0.00040315  | 2087.0354  | 696.6857 | 2087.03491 | 696.685608 | 3 | 15 | 16.1903 | 4.64 |
| 43 | 38.44 | 40.47 | 30.1 | ARPC1B_FlexII | 99.0 | TQIAICPNNHVHIYK         | Propionamide(C) @6; Label:13C(6)15N(2)(K) @17                                                                            |                | 0.00185734  | 2087.03735 | 1044.526 | 2087.03491 | 1044.52478 | 2 | 22 | 16.2491 | 4.64 |
| 43 | 38.44 | 40.47 | 30.1 | ARPC1B_FlexII | 99.0 | TQIAICPNNHVHIYK         | Propionamide(C) @6; Label:13C(6)15N(2)(K) @17                                                                            |                | -0.00216033 | 2087.03272 | 696.6849 | 2087.03491 | 696.685608 | 3 | 16 | 16.4567 | 4.64 |
| 43 | 38.44 | 40.47 | 30.1 | ARPC1B_FlexII | 99.0 | TQIAICPNNHVHIYK         | Propionamide(C) @6; Deamidated(N) @8; Label:13C(6)15N(2)(K) @17                                                          |                | 0.00783387  | 2088.02734 | 1045.021 | 2088.01904 | 1045.01672 | 2 | 21 | 16.5237 | 4.64 |
| 43 | 38.44 | 40.47 | 30.1 | ARPC1B_FlexII | 99.0 | TQIAICPNNHVHIYK         | Propionamide(C) @6; Label:13C(6)15N(2)(K) @17                                                                            |                | 0.00224487  | 2087.03735 | 522.7666 | 2087.03491 | 522.765991 | 4 | 13 | 16.1841 | 4.64 |
| 43 | 38.44 | 40.47 | 30.1 | ARPC1B_FlexII | 99.0 | TWKPTLVILR              | Label:13C(6)15N(2)(K) @3; Label:13C(6)15N(4)(R) @10                                                                      |                | 0.00807018  | 1243.78528 | 622.8999 | 1243.7771  | 622.895874 | 2 | 11 | 18.4574 | 4.64 |
| 43 | 38.44 | 40.47 | 30.1 | ARPC1B_FlexII | 99.0 | TWKPTLVILR              | Label:13C(6)15N(2)(K) @3; Label:13C(6)15N(4)(R) @10                                                                      |                | -0.00055566 | 1243.77661 | 415.5995 | 1243.7771  | 415.59967  | 3 | 11 | 18.4325 | 4.64 |
| 43 | 38.44 | 40.47 | 30.1 | ARPC1B_FlexII | 99.0 | VAWVSHDSTVCLADADKK      | Propionamide(C) @11; Label:13C(6)15N(2)(K) @17; Label:13C(6)15N(2)(K) @18                                                | missed K-K @17 | 7.77E-05    | 2031.00659 | 508.7589 | 2031.00659 | 508.758942 | 4 | 13 | 16.297  | 4.64 |
| 43 | 38.44 | 40.47 | 30.1 | ARPC1B_FlexII | 99.0 | VHELKEHNGQVTDIDWAPESNR  | Label:13C(6)15N(2)(K) @5; Deamidated(N) @8; Label:13C(6)15N(4)(R) @22                                                    | missed K-E @5  | 0.0321669   | 2534.25903 | 845.7603 | 2534.22681 | 845.749573 | 3 | 16 | 16.167  | 4.64 |
| 43 | 38.44 | 40.47 | 30.1 | ARPC1B_FlexII | 99.0 | VHELKEHNGQVTDIDWAPESNR  | Label:13C(6)15N(2)(K) @5; Deamidated(N) @8; Label:13C(6)15N(4)(R) @22                                                    | missed K-E @5  | 0.0235715   | 2534.25049 | 634.5699 | 2534.22681 | 634.564026 | 4 | 13 | 16.2315 | 4.64 |
| 43 | 38.44 | 40.47 | 30.1 | ARPC1B_FlexII | 99.0 | VHELKEHNGQVTDIDWAPESNR  | Label:13C(6)15N(2)(K) @5; Deamidated(Q) @10; Label:13C(6)15N(4)(R) @22                                                   | missed K-E @5  | 0.0348737   | 2534.26148 | 507.8596 | 2534.22681 | 507.852661 | 5 | 13 | 16.1628 | 4.64 |
| 43 | 38.44 | 40.47 | 30.1 | ARPC1B_FlexII | 99.0 | YPTFLYK                 | Label:13C(6)15N(2)(K) @7                                                                                                 |                | -0.00165037 | 938.497681 | 470.2561 | 938.499329 | 470.256928 | 2 | 9  | 18.0092 | 4.64 |
| 43 | 38.44 | 40.47 | 30.1 | ARPC1B_FlexII | 99.0 | YPTFLYK                 | Label:13C(6)15N(2)(K) @7                                                                                                 |                | 0.00020099  | 938.499451 | 470.257  | 938.499329 | 470.256928 | 2 | 9  | 17.9008 | 4.64 |
| 43 | 38.44 | 40.47 | 30.1 | ARPC1B_FlexII | 99.0 | YPTFLYK                 | Label:13C(6)15N(2)(K) @7                                                                                                 |                | -0.00091407 | 938.498474 | 470.2565 | 938.499329 | 470.256928 | 2 | 9  | 17.7612 | 4.64 |
| 44 | 37.29 | 39.32 | 43.8 | GMCL1_FlexII  | 99.0 | AEQDSEVGPQOEINKELEGNSMR | Label:13C(6)15N(2)(K) @14; Label:13C(6)15N(4)(R) @23                                                                     | missed K-E @14 | -0.00187023 | 2606.18726 | 1304.101 | 2606.18848 | 1304.10156 | 2 | 25 | 16.3178 | 3.65 |
| 44 | 37.29 | 39.32 | 43.8 | GMCL1_FlexII  | 99.0 | DFEGMAFLETEQGKPFVSVFR   | Deamidated(Q) @12; Label:13C(6)15N(2)(K) @14; Label:13C(6)15N(4)(R) @21                                                  |                | 0.0126449   | 2452.18726 | 1227.101 | 2452.17407 | 1227.09424 | 2 | 17 | 20.1129 | 3.65 |
| 44 | 37.29 | 39.32 | 43.8 | GMCL1_FlexII  | 99.0 | DQEQVVMNLDNR            | Label:13C(6)15N(4)(R) @12                                                                                                |                | -0.00336343 | 1442.66663 | 722.3406 | 1442.66992 | 722.342224 | 2 | 15 | 16.8966 | 3.65 |
| 44 | 37.29 | 39.32 | 43.8 | GMCL1_FlexII  | 99.0 | IEQDAVVPSEWLSSVYK       | Label:13C(6)15N(2)(K) @18                                                                                                |                | -0.00027482 | 2070.07544 | 1036.045 | 2070.07642 | 1036.04553 | 2 | 20 | 19.6896 | 3.65 |
| 44 | 37.29 | 39.32 | 43.8 | GMCL1_FlexII  | 99.0 | KDFEGMAFLETEQGKPFVSVFR  | Label:13C(6)15N(2)(K) @1; Deamidated(Q) @13; Label:13C(6)15N(2)(K) @15; Label:13C(6)15N(4)(R) @22                        | missed K-D @1  | 0.00987938  | 2588.29297 | 648.0805 | 2588.2832  | 648.078064 | 4 | 17 | 19.2062 | 3.65 |
| 44 | 37.29 | 39.32 | 43.8 | GMCL1_FlexII  | 99.0 | LIFLYICCNFLYISPEKK      | Propionamide(C) @9; Propionamide(C) @10; Label:13C(6)15N(2)(K) @19; Label:13C(6)15N(2)(K) @20                            | missed K-K @19 | 0.00335765  | 2574.40015 | 859.1406 | 2574.39648 | 859.139465 | 3 | 13 | 20.4371 | 3.65 |
| 44 | 37.29 | 39.32 | 43.8 | GMCL1_FlexII  | 99.0 | LQYIISLASAR             | Label:13C(6)15N(4)(R) @1                                                                                                 |                | -0.00017354 | 1348.73486 | 675.3747 | 1348.73511 | 675.374817 | 2 | 13 | 18.5531 | 3.65 |
| 44 | 37.29 | 39.32 | 43.8 | GMCL1_FlexII  | 99.0 | NTLNQPCSGSVSLQPR        | Propionamide(C) @7; Label:13C(6)15N(4)(R) @16                                                                            |                | -0.00999544 | 1780.8667  | 891.4406 | 1780.87659 | 891.445557 | 2 | 17 | 15.9514 | 3.65 |
| 44 | 37.29 | 39.32 | 43.8 | GMCL1_FlexII  | 99.0 | QLLTETDVVFSK            | Gln->pyro-Glu @N-term; Label:13C(6)15N(2)(K) @12                                                                         |                | -0.00645882 | 1456.72644 | 729.3705 | 1456.73291 | 729.373779 | 2 | 13 | 20.4196 | 3.65 |
| 44 | 37.29 | 39.32 | 43.8 | GMCL1_FlexII  | 99.0 | QPRPALAAQQAQGAR         | Gln->pyro-Glu @N-term; Label:13C(6)15N(4)(R) @3; Label:13C(6)15N(4)(R) @14                                               |                | 0.00045316  | 1493.79712 | 747.9058 | 1493.79663 | 747.905579 | 2 | 18 | 15.322  | 3.65 |
| 44 | 37.29 | 39.32 | 43.8 | GMCL1_FlexII  | 99.0 | QQWFAMLR                | Gln->pyro-Glu @N-term; Label:13C(6)15N(4)(R) @8                                                                          |                | 0.00213769  | 1071.5221  | 536.7683 | 1071.5199  | 536.767273 | 2 | 10 | 20.4837 | 3.65 |
| 44 | 37.29 | 39.32 | 43.8 | GMCL1_FlexII  | 99.0 | RNTLNQPCSGSVSLQPR       | Label:13C(6)15N(4)(R) @1; Propionamide(C) @8; Label:13C(6)15N(4)(R) @17                                                  | missed R-N @1  | -0.0062245  | 1946.97961 | 650.0005 | 1946.98596 | 650.002564 | 3 | 14 | 15.4986 | 3.65 |
| 44 | 37.29 | 39.32 | 43.8 | GMCL1_FlexII  | 99.0 | RPDTGDDAAGHGFCYAGSHKR   | Label:13C(6)15N(4)(R) @1; Propionamide(C) @14; Propionamide(C) @16; Label:13C(6)15N(2)(K) @21                            |                | 0.00795049  | 2323.9895  | 775.6705 | 2323.98169 | 775.667847 | 3 | 17 | 14.6874 | 3.65 |
| 44 | 37.29 | 39.32 | 43.8 | GMCL1_FlexII  | 99.0 | RPDTGDDAAGHGFCYAGSHKR   | Label:13C(6)15N(4)(R) @1; Propionamide(C) @14; Propionamide(C) @16; Label:13C(6)15N(2)(K) @21; Label:13C(6)15N(4)(R) @22 | missed K-R @21 | 0.00189476  | 2490.09302 | 623.5305 | 2490.09106 | 623.53009  | 4 | 19 | 14.1931 | 3.65 |
| 44 | 37.29 | 39.32 | 43.8 | GMCL1_FlexII  | 99.0 | TTGYQLTLEKDEQVVMNLDNR   | Label:13C(6)15N(2)(K) @11; Deamidated(Q) @13; Label:13C(6)15N(4)(R) @23                                                  | missed K-D @11 | 0.00604264  | 2699.35034 | 900.7907 | 2699.34424 | 900.788696 | 3 | 18 | 19.1361 | 3.65 |
| 44 | 37.29 | 39.32 | 43.8 | GMCL1_FlexII  | 99.0 | TVCGYYSAGTYGLDSVK       | Propionamide(C) @3; Label:13C(6)15N(2)(K) @18                                                                            |                | -0.00581924 | 1962.90662 | 982.4606 | 1962.91248 | 982.463501 | 2 | 12 | 17.5358 | 3.65 |
| 44 | 37.29 | 39.32 | 43.8 | GMCL1_FlexII  | 99.0 | YIYQTLFLNGENSIDK        | Label:13C(6)15N(2)(K) @16                                                                                                |                | 0.00036093  | 1924.96643 | 963.4905 | 1924.96619 | 963.490356 | 2 | 19 | 19.1103 | 3.65 |
| 44 | 37.29 | 39.32 | 43.8 | GMCL1_FlexII  | 99.0 | HRLQYIISLASAR           | Label:13C(6)15N(4)(R) @3; Deamidated(Q) @5; Label:13C(6)15N(4)(R) @15                                                    | missed R-L @3  | 0.0300011   | 1776.00964 | 593.0105 | 1775.97974 | 593.000488 | 3 | 10 | 19.108  | 3.65 |
| 44 | 37.29 | 39.32 | 43.8 | GMCL1_FlexII  | 99.0 | AEQDSEVGPQOEINKELEGNSMR | Deamidated(Q) @10; Label:13C(6)15N(2)(K) @14; Label:13C(6)15N(4)(R) @23                                                  | missed K-E @14 | 0.0173136   | 2607.18994 | 870.0706 | 2607.17261 | 870.064758 | 3 | 18 | 16.2154 | 3.65 |
| 44 | 37.29 | 39.32 | 43.8 | GMCL1_FlexII  | 99.0 | AEQDSEVGPQOEINKELEGNSMR | Deamidated(N) @13; Label:13C(6)15N(2)(K) @14; Label:13C(6)15N(4)(R) @23                                                  | missed K-E @14 | 0.0173136   | 2607.18994 | 870.0706 | 2607.17261 | 870.064758 | 3 | 17 | 16.4967 | 3.65 |
| 44 | 37.29 | 39.32 | 43.8 | GMCL1_FlexII  | 99.0 | DFEGMAFLETEQGKPFVSVFR   | Deamidated(Q) @12; Label:13C(6)15N(2)(K) @14; Label:13C(6)15N(4)(R) @21                                                  |                | 0.00589543  | 2452.17993 | 818.4006 | 2452.17407 | 818.398621 | 3 | 13 | 20.0865 | 3.65 |
| 44 | 37.29 | 39.32 | 43.8 | GMCL1_FlexII  | 99.0 | IEQDAVVPSEWLSSVYK       | Label:13C(6)15N(2)(K) @18                                                                                                |                | 0.0032296   | 2070.07959 | 691.0338 | 2070.07642 | 691.032776 | 3 | 16 | 19.7152 | 3.65 |
| 44 | 37.29 | 39.32 | 43.8 | GMCL1_FlexII  | 99.0 | IEQDAVVPSEWLSSVYK       | Label:13C(6)15N(2)(K) @18                                                                                                |                | -3.07E-05   | 2070.07739 | 1036.046 | 2070.07642 | 1036.04553 | 2 | 18 | 19.9513 | 3.65 |
| 44 | 37.29 | 39.32 | 43.8 | GMCL1_FlexII  | 99.0 | IEQDAVVPSEWLSSVYK       | Deamidated(Q) @4                                                                                                         |                | 0.00036639  | 2063.04736 | 1032.531 | 2063.04639 | 1032.5304  | 2 | 12 | 19.8078 | 3.65 |
| 44 | 37.29 | 39.32 | 43.8 | GMCL1_FlexII  | 99.0 | LQYIISLASAR             | Label:13C(6)15N(4)(R) @12                                                                                                |                | 0.00315591  | 1358.74646 | 680.3805 | 1358.74329 | 680.378967 | 2 | 13 | 18.4846 | 3.65 |
| 44 | 37.29 | 39.32 | 43.8 | GMCL1_FlexII  | 99.0 | LQYIISLASAR             | Label:13C(6)15N(4)(R) @12                                                                                                |                | -0.00148277 | 1358.74182 | 680.3782 | 1358.74329 | 680.378967 | 2 | 13 | 18.7644 | 3.65 |
| 44 | 37.29 | 39.32 | 43.8 | GMCL1_FlexII  | 99.0 | NTLNQPCSGSVSLQPR        | Propionamide(C) @7; Label:13C(6)15N(4)(R) @16                                                                            |                | 0.00248115  | 1780.87903 | 594.6336 | 1780.87659 | 594.632813 | 3 | 16 | 16.0479 | 3.65 |
| 44 | 37.29 | 39.32 | 43.8 | GMCL1_FlexII  | 99.0 | NTLNQPCSGSVSLQPR        | Propionamide(C) @7; Label:13C(6)15N(4)(R) @16                                                                            |                | 0.00160124  | 1780.8783  | 891.4464 | 1780.87659 | 891.445557 | 2 | 18 | 16.2297 | 3.65 |
| 44 | 37.29 | 39.32 | 43.8 | GMCL1_FlexII  | 99.0 | QLLTETDVVFSK            | Label:13C(6)15N(2)(K) @12                                                                                                |                | 0.00703393  | 1473.76672 | 737.8906 | 1473.75952 | 737.887024 | 2 | 12 | 19.0707 | 3.65 |
| 44 | 37.29 | 39.32 | 43.8 | GMCL1_FlexII  | 99.0 | QPRPALAAQQAQGAR         | Label:13C(6)15N(4)(R) @3; Label:13C(6)15N(4)(R) @14                                                                      |                | 0.          |            |          |            |            |   |    |         |      |

|    |       |       |      |                |      |                            |                                                                                                 |                              |             |            |          |            |            |   |    |         |       |
|----|-------|-------|------|----------------|------|----------------------------|-------------------------------------------------------------------------------------------------|------------------------------|-------------|------------|----------|------------|------------|---|----|---------|-------|
| 44 | 37.29 | 39.32 | 43.8 | GMCL1_FlexIII  | 99.0 | YPTFLYK                    | Label:13C(6)15N(2)(K)@7                                                                         | cleaved N-Y@N-term           | -0.00091407 | 938.498474 | 470.2565 | 938.499329 | 470.256928 | 2 | 9  | 17.7612 | 3.65  |
| 45 | 37.2  | 41.27 | 48.7 | CDC2L5_FlexIII | 99.0 | CLLADLPLPPELPGGDDLSK       | Propionamide(C)@1; Label:13C(6)15N(2)(K)@20                                                     |                              | -0.0089261  | 2141.10815 | 714.71   | 2141.11694 | 714.712952 | 3 | 14 | 20.4165 | 12.09 |
| 45 | 37.2  | 41.27 | 48.7 | CDC2L5_FlexIII | 99.0 | CLLADLPLPPELPGGDDLSKSPEEKK | Propionamide(C)@1; Label:13C(6)15N(2)(K)@20; Label:13C(6)15N(2)(K)@25; Label:13C(6)15N(2)(K)@26 | missed K-S@20; missed K-K@25 | 0.0227537   | 2855.52808 | 952.85   | 2855.50537 | 952.842346 | 3 | 12 | 19.1117 | 12.09 |
| 45 | 37.2  | 41.27 | 48.7 | CDC2L5_FlexIII | 99.0 | CNSILLNNR                  | Propionamide(C)@1; Label:13C(6)15N(4)(R)@9                                                      |                              | -0.00121388 | 1126.57813 | 564.2963 | 1126.57922 | 564.296875 | 2 | 12 | 16.2565 | 12.09 |
| 45 | 37.2  | 41.27 | 48.7 | CDC2L5_FlexIII | 99.0 | CVDKFDIGIIGEGTYGQVYK       | Propionamide(C)@1; Label:13C(6)15N(2)(K)@4; Label:13C(6)15N(2)(K)@21                            | missed K-F@4                 | -0.017302   | 2404.2146  | 802.4122 | 2404.23193 | 802.417908 | 3 | 19 | 19.666  | 12.09 |
| 45 | 37.2  | 41.27 | 48.7 | CDC2L5_FlexIII | 99.0 | DKDGTGEMVALK               | Label:13C(6)15N(2)(K)@2; Label:13C(6)15N(2)(K)@11                                               | missed K-D@2                 | -0.00015173 | 1221.62451 | 611.8195 | 1221.62463 | 611.81958  | 2 | 17 | 15.4959 | 12.09 |
| 45 | 37.2  | 41.27 | 48.7 | CDC2L5_FlexIII | 99.0 | DKDGTGEMVALKK              | Label:13C(6)15N(2)(K)@2; Label:13C(6)15N(2)(K)@11; Label:13C(6)15N(2)(K)@12                     | missed K-D@2; missed K-K@11  | -0.00846052 | 1357.72522 | 679.8699 | 1357.73377 | 679.874146 | 2 | 19 | 14.4673 | 12.09 |
| 45 | 37.2  | 41.27 | 48.7 | CDC2L5_FlexIII | 99.0 | EIVTDKEDALDFK              | Label:13C(6)15N(2)(K)@6; Label:13C(6)15N(2)(K)@13                                               | missed K-E@6                 | 0.00072496  | 1537.78552 | 769.9    | 1537.78467 | 769.899597 | 2 | 18 | 16.7683 | 12.09 |
| 45 | 37.2  | 41.27 | 48.7 | CDC2L5_FlexIII | 99.0 | EIVTDKEDALDFKK             | Label:13C(6)15N(2)(K)@6; Label:13C(6)15N(2)(K)@13; Label:13C(6)15N(2)(K)@14                     | missed K-E@6; missed K-K@13  | -0.00843832 | 1673.8855  | 837.95   | 1673.8938  | 837.954163 | 2 | 18 | 15.9745 | 12.09 |
| 45 | 37.2  | 41.27 | 48.7 | CDC2L5_FlexIII | 99.0 | EKIDIWGKR                  | Label:13C(6)15N(2)(K)@2; Label:13C(6)15N(2)(K)@8; Label:13C(6)15N(4)(R)@9                       | missed K-D@2; missed K-R@8   | 0.00288457  | 1171.62244 | 586.8185 | 1171.61963 | 586.817078 | 2 | 11 | 14.2474 | 12.09 |
| 45 | 37.2  | 41.27 | 48.7 | CDC2L5_FlexIII | 99.0 | KPIFQANQELAQLLEIR          | Label:13C(6)15N(2)(K)@1; Label:13C(6)15N(4)(R)@17                                               |                              | -0.00323244 | 2028.14551 | 1015.08  | 2028.14868 | 1015.0816  | 2 | 25 | 19.0691 | 12.09 |
| 45 | 37.2  | 41.27 | 48.7 | CDC2L5_FlexIII | 99.0 | KPIFQANQELAQLLEIRHEENEVSDK | Label:13C(6)15N(2)(K)@1; Label:13C(6)15N(4)(R)@17; Label:13C(6)15N(2)(K)@26                     | missed R-H@17                | -0.00429039 | 3103.6106  | 776.9099 | 3103.61475 | 776.911011 | 4 | 19 | 18.1173 | 12.09 |
| 45 | 37.2  | 41.27 | 48.7 | CDC2L5_FlexIII | 99.0 | LDNEKEGFPITAIR             | Label:13C(6)15N(2)(K)@5; Label:13C(6)15N(4)(R)@14                                               | missed K-E@5                 | 0.00155798  | 1619.86523 | 810.9399 | 1619.86377 | 810.939148 | 2 | 17 | 17.4369 | 12.09 |
| 45 | 37.2  | 41.27 | 48.7 | CDC2L5_FlexIII | 99.0 | LYSSEESRPTYNKK             | Label:13C(6)15N(4)(R)@8; Label:13C(6)15N(2)(K)@13                                               |                              | 0.00089758  | 1590.7655  | 796.39   | 1590.76453 | 796.389526 | 2 | 16 | 14.4152 | 12.09 |
| 45 | 37.2  | 41.27 | 48.7 | CDC2L5_FlexIII | 99.0 | QLTHQSIINMK                | Gln->pyro-Glu@N-term; Label:13C(6)15N(2)(K)@11                                                  |                              | 7.36E-05    | 1302.68469 | 652.3496 | 1302.68457 | 652.349548 | 2 | 14 | 17.46   | 12.09 |
| 45 | 37.2  | 41.27 | 48.7 | CDC2L5_FlexIII | 99.0 | VITLWYRPPPELLLGEER         | Label:13C(6)15N(4)(R)@7; Label:13C(6)15N(4)(R)@17                                               |                              | -0.00389676 | 2103.15942 | 1052.587 | 2103.16309 | 1052.58887 | 2 | 15 | 19.7938 | 12.09 |
| 45 | 37.2  | 41.27 | 48.7 | CDC2L5_FlexIII | 99.0 | VRLDNEKEGFPITAIR           | Label:13C(6)15N(4)(R)@2; Label:13C(6)15N(2)(K)@7; Label:13C(6)15N(4)(R)@16                      | missed R-L@2; missed K-E@7   | -0.0137355  | 1885.02795 | 629.3499 | 1885.04163 | 629.354492 | 3 | 14 | 17.2454 | 12.09 |
| 45 | 37.2  | 41.27 | 48.7 | CDC2L5_FlexIII | 99.0 | YTPAIDVWSCGILGELFTK        | Propionamide(C)@10; Propionamide(C)@12; Label:13C(6)15N(2)(K)@20                                |                              | 0.0149341   | 2365.17334 | 1183.594 | 2365.15772 | 1183.58618 | 2 | 19 | 20.5073 | 12.09 |
| 45 | 37.2  | 41.27 | 48.7 | CDC2L5_FlexIII | 99.0 | CLLADLPLPPELPGGDDLSK       | Propionamide(C)@1; Label:13C(6)15N(2)(K)@20                                                     |                              | 0.0083671   | 2141.12524 | 1071.57  | 2141.11694 | 1071.5658  | 2 | 16 | 20.0819 | 12.09 |
| 45 | 37.2  | 41.27 | 48.7 | CDC2L5_FlexIII | 99.0 | CLLADLPLPPELPGGDDLSK       | Propionamide(C)@1; Label:13C(6)15N(2)(K)@20                                                     |                              | -0.00086946 | 2141.11597 | 714.7126 | 2141.11694 | 714.712952 | 3 | 15 | 20.1345 | 12.09 |
| 45 | 37.2  | 41.27 | 48.7 | CDC2L5_FlexIII | 99.0 | CLLADLPLPPELPGGDDLSK       | Propionamide(C)@1; Label:13C(6)15N(2)(K)@20                                                     |                              | 0.00446085  | 2141.12134 | 1071.568 | 2141.11694 | 1071.5658  | 2 | 16 | 20.361  | 12.09 |
| 45 | 37.2  | 41.27 | 48.7 | CDC2L5_FlexIII | 99.0 | CNSILLNNR                  | Propionamide(C)@1; Label:13C(6)15N(4)(R)@9                                                      |                              | 0.00598827  | 1126.58533 | 564.2999 | 1126.57922 | 564.296875 | 2 | 12 | 16.5303 | 12.09 |
| 45 | 37.2  | 41.27 | 48.7 | CDC2L5_FlexIII | 99.0 | CNSILLNNR                  | Propionamide(C)@1                                                                               |                              | -0.00576408 | 1116.56531 | 559.2899 | 1116.57092 | 559.292786 | 2 | 11 | 16.3501 | 12.09 |
| 45 | 37.2  | 41.27 | 48.7 | CDC2L5_FlexIII | 99.0 | CNSILLNNR                  | Propionamide(C)@1; Label:13C(6)15N(4)(R)@9                                                      |                              | 0.00598827  | 1126.58533 | 564.2999 | 1126.57922 | 564.296875 | 2 | 9  | 22.3102 | 12.09 |
| 45 | 37.2  | 41.27 | 48.7 | CDC2L5_FlexIII | 99.0 | CVDKFDIGIIGEGTYGQVYK       | Propionamide(C)@1; Label:13C(6)15N(2)(K)@4; Label:13C(6)15N(2)(K)@21                            | missed K-F@4                 | -0.00019983 | 2404.23145 | 802.4178 | 2404.23193 | 802.417908 | 3 | 22 | 19.8671 | 12.09 |
| 45 | 37.2  | 41.27 | 48.7 | CDC2L5_FlexIII | 99.0 | CVDKFDIGIIGEGTYGQVYK       | Propionamide(C)@1; Label:13C(6)15N(2)(K)@4; Label:13C(6)15N(2)(K)@21                            | missed K-F@4                 | 0.00602576  | 2404.23804 | 802.4199 | 2404.23193 | 802.417908 | 3 | 18 | 20.128  | 12.09 |
| 45 | 37.2  | 41.27 | 48.7 | CDC2L5_FlexIII | 99.0 | CVDKFDIGIIGEGTYGQVYK       | Propionamide(C)@1; Label:13C(6)15N(2)(K)@4; Deamidated(Q)@18; Label:13C(6)15N(2)(K)@21          | missed K-F@4                 | 0.00951839  | 2405.22534 | 1203.62  | 2405.21606 | 1203.61523 | 2 | 17 | 19.6512 | 12.09 |
| 45 | 37.2  | 41.27 | 48.7 | CDC2L5_FlexIII | 99.0 | CVDKFDIGIIGEGTYGQVYK       | Propionamide(C)@1; Label:13C(6)15N(2)(K)@4; Label:13C(6)15N(2)(K)@21                            | missed K-F@4                 | -0.0213993  | 2404.21045 | 602.0599 | 2404.23193 | 602.065247 | 4 | 17 | 19.7263 | 12.09 |
| 45 | 37.2  | 41.27 | 48.7 | CDC2L5_FlexIII | 99.0 | CVDKFDIGIIGEGTYGQVYK       | Propionamide(C)@1; Label:13C(6)15N(2)(K)@4; Label:13C(6)15N(2)(K)@21                            | missed K-F@4                 | 0.00602576  | 2404.23804 | 802.4199 | 2404.23193 | 802.417908 | 3 | 13 | 26.5361 | 12.09 |
| 45 | 37.2  | 41.27 | 48.7 | CDC2L5_FlexIII | 99.0 | CVDKFDIGIIGEGTYGQVYK       | Propionamide(C)@1; Label:13C(6)15N(2)(K)@4; Deamidated(Q)@18; Label:13C(6)15N(2)(K)@21          | missed K-F@4                 | 0.0120616   | 2405.22778 | 802.7499 | 2405.21606 | 802.745911 | 3 | 9  | 26.7908 | 12.09 |
| 45 | 37.2  | 41.27 | 48.7 | CDC2L5_FlexIII | 99.0 | DKDGTGEMVALKK              | Label:13C(6)15N(2)(K)@2; Label:13C(6)15N(2)(K)@11; Label:13C(6)15N(2)(K)@12                     | missed K-D@2; missed K-K@11  | 0.0140717   | 1357.74793 | 453.5899 | 1357.73377 | 453.585205 | 3 | 15 | 14.6548 | 12.09 |
| 45 | 37.2  | 41.27 | 48.7 | CDC2L5_FlexIII | 99.0 | DKDGTGEMVALKK              | Label:13C(6)15N(2)(K)@2; Label:13C(6)15N(2)(K)@11; Label:13C(6)15N(2)(K)@12                     | missed K-D@2; missed K-K@11  | 0.00921109  | 1373.73779 | 458.9199 | 1373.72864 | 458.91684  | 3 | 11 | 12.692  | 12.09 |
| 45 | 37.2  | 41.27 | 48.7 | CDC2L5_FlexIII | 99.0 | DKDGTGEMVALKK              | Label:13C(6)15N(2)(K)@2; Label:13C(6)15N(2)(K)@11; Label:13C(6)15N(2)(K)@12                     | missed K-D@2; missed K-K@11  | -0.00337406 | 1357.73059 | 340.4399 | 1357.73377 | 340.440704 | 4 | 11 | 14.4653 | 12.09 |
| 45 | 37.2  | 41.27 | 48.7 | CDC2L5_FlexIII | 99.0 | DKDGTGEMVALKK              | Label:13C(6)15N(2)(K)@2; Oxidation(M)@7; Label:13C(6)15N(2)(K)@11; Label:13C(6)15N(2)(K)@12     | missed K-D@2; missed K-K@11  | 0.00921109  | 1373.73779 | 458.9199 | 1373.72864 | 458.91684  | 3 | 10 | 12.9564 | 12.09 |
| 45 | 37.2  | 41.27 | 48.7 | CDC2L5_FlexIII | 99.0 | EIVTDKEDALDFK              | Label:13C(6)15N(2)(K)@6; Label:13C(6)15N(2)(K)@13; Label:13C(6)15N(2)(K)@14                     | missed K-E@6; missed K-K@13  | -0.00601716 | 1673.88757 | 558.9698 | 1673.8938  | 558.971863 | 3 | 12 | 15.9164 | 12.09 |
| 45 | 37.2  | 41.27 | 48.7 | CDC2L5_FlexIII | 99.0 | KPIFQANQELAQLLEIR          | Label:13C(6)15N(2)(K)@1; Label:13C(6)15N(4)(R)@17                                               |                              | 0.00925952  | 2028.15784 | 677.0599 | 2028.14868 | 677.056824 | 3 | 22 | 19.0462 | 12.09 |
| 45 | 37.2  | 41.27 | 48.7 | CDC2L5_FlexIII | 99.0 | KPIFQANQELAQLLEIRHEENEVSDK | Label:13C(6)15N(2)(K)@1; Label:13C(6)15N(4)(R)@17; Label:13C(6)15N(2)(K)@26                     | missed R-H@17                | 0.0192888   | 3104.61816 | 1035.88  | 3104.59888 | 1035.87354 | 3 | 18 | 18.1515 | 12.09 |
| 45 | 37.2  | 41.27 | 48.7 | CDC2L5_FlexIII | 99.0 | KPIFQANQELAQLLEIRHEENEVSDK | Label:13C(6)15N(2)(K)@1; Deamidated(Q)@12; Label:13C(6)15N(4)(R)@17; Label:13C(6)15N(2)(K)@26   | missed R-H@17                | 0.0142985   | 3104.61304 | 621.9299 | 3104.59888 | 621.927063 | 5 | 14 | 18.2328 | 12.09 |
| 45 | 37.2  | 41.27 | 48.7 | CDC2L5_FlexIII | 99.0 | LADFGLAR                   | Label:13C(6)15N(4)(R)@8                                                                         |                              | 0.00035629  | 871.479492 | 436.747  | 871.479126 | 436.746826 | 2 | 9  | 17.4043 | 12.09 |
| 45 | 37.2  | 41.27 | 48.7 | CDC2L5_FlexIII | 99.0 | LADFGLAR                   | Label:13C(6)15N(4)(R)@8                                                                         |                              | 0.00083357  | 861.471863 | 431.7432 | 861.470825 | 431.742706 | 2 | 11 | 17.3967 | 12.09 |
| 45 | 37.2  | 41.27 | 48.7 | CDC2L5_FlexIII | 99.0 | LADFGLAR                   | Label:13C(6)15N(4)(R)@8                                                                         |                              | 0.00029579  | 871.479492 | 436.747  | 871.479126 | 436.746826 | 2 | 9  | 17.3885 | 12.09 |
| 45 | 37.2  | 41.27 | 48.7 | CDC2L5_FlexIII | 99.0 | LDNEKEGFPITAIR             | Label:13C(6)15N(2)(K)@5; Label:13C(6)15N(4)(R)@14                                               | missed K-E@5                 | -0.00584752 | 1619.85791 | 540.9599 | 1619.86377 | 540.961853 | 3 | 14 | 17.4118 | 12.09 |
| 45 | 37.2  | 41.27 | 48.7 | CDC2L5_FlexIII | 99.0 | LDNEKEGFPITAIR             | Label:13C(6)15N(2)(K)@5; Label:13C(6)15N(4)(R)@14                                               | missed K-E@5                 | 0.00037807  | 1619.86414 | 540.962  | 1619.86377 | 540.961853 | 3 | 14 | 17.6902 | 12.09 |
| 45 | 37.2  | 41.27 | 48.7 | CDC2L5_FlexIII | 99.0 | LDNEKEGFPITAIR             | Label:13C(6)15N(2)(K)@5; Label:13C(6)15N(4)(R)@14                                               | missed K-E@5                 | -2.89E-05   | 1619.86365 | 810.9391 | 1619.86377 | 810.939148 | 2 | 12 | 17.7301 | 12.09 |
| 45 | 37.2  | 41.27 | 48.7 | CDC2L5_FlexIII | 99.0 | LYSSEESRPTYNKK             | Label:13C(6)15N(4)(R)@8; Label:13C(6)15N(2)(K)@13                                               |                              | 0.00089758  | 1590.7655  | 796.39   | 1590.76453 | 796.389526 | 2 | 16 | 14.1385 | 12.09 |
| 45 | 37.2  | 41.27 | 48.7 | CDC2L5_FlexIII | 99.0 | LYSSEESRPTYNKK             | Label:13C(6)15N(4)(R)@8; Label:13C(6)15N(2)(K)@13                                               |                              | -0.00656896 | 1590.75781 | 531.2599 | 1590.76453 | 531.262085 | 3 | 11 | 14.1189 | 12.09 |
| 45 | 37.2  | 41.27 | 48.7 | CDC2L5_FlexIII | 99.0 | QLTHQSIINMK                | Label:13C(6)15N(2)(K)@11                                                                        |                              | 0.00160361  | 1319.71265 | 660.8636 | 1319.71106 | 660.862854 | 2 | 13 | 15.9758 | 12.09 |
| 45 | 37.2  | 41.27 | 48.7 | CDC2L5_FlexIII | 99.0 | VITLWYRPPPELLLGEER         | Label:13C(6)15N(4)(R)@7; Label:13C(6)15N(4)(R)@17                                               |                              | 0.00611301  | 2103.16943 | 1052.592 | 2103.16309 | 1052.58887 | 2 | 13 | 20.0797 | 12.09 |
| 45 | 37.2  | 41.27 | 48.7 | CDC2L5_FlexIII | 99.0 | VITLWYRPPPELLLGEER         | Label:13C(6)15N(4)(R)@7; Label:13C(6)15N(4)(R)@17                                               |                              | -0.00519875 | 2103.15772 | 702.0599 | 2103.16309 | 702.061646 | 3 | 12 | 20.1258 | 12.09 |
| 45 | 37.2  | 41.27 | 48.7 | CDC2L5_FlexIII | 99.0 | VRLDNEKEGFPITAIR           | Label:13C(6)15N(4)(R)@2; Label:13C(6)15N(2)(K)@7; Label:13C(6)15N(4)(R)@16                      | missed R-L@2; missed K-E@7   | -0.0048041  | 1885.03687 | 943.5257 | 1885.04163 | 943.528076 | 2 | 15 | 17.3281 | 12.09 |
| 45 | 37.2  | 41.27 | 48.7 | CDC2L5_FlexIII | 99.0 | VRLDNEKEGFPITAIR           | Label:13C(6)15N(4)(R)@2; Deamidated(N)@5; Label:13C(6)15N(2)(K)@7; Label:13C(6)15N(4)(R)@16     | missed R-L@2; missed K-E@7   | 0.0223297   | 1886.04785 | 629.6899 | 1886.02564 | 629.682495 | 3 | 13 | 17.5263 | 12.09 |
| 45 | 37.2  | 41.27 | 48.7 | CDC2L5_FlexIII | 99.0 | YPTFLYK                    | Label:13C(6)15N(2)(K)@7                                                                         | cleaved I-Y@N-term           | -0.00165037 | 938.497681 | 470.2561 | 938.499329 | 470.256928 | 2 | 9  | 18.0092 | 12.09 |
| 45 | 37.2  |       |      |                |      |                            |                                                                                                 |                              |             |            |          |            |            |   |    |         |       |

|    |       |       |                     |                                              |                                                                                              |             |            |          |            |             |   |    |         |       |
|----|-------|-------|---------------------|----------------------------------------------|----------------------------------------------------------------------------------------------|-------------|------------|----------|------------|-------------|---|----|---------|-------|
| 46 | 36.36 | 38.64 | 86.3 HOXC11_FlexIII | 99.0 NSYSSCYAAADELMHR                        | Propionamide(C) @6                                                                           | -0.00248051 | 1887.78552 | 944.9    | 1887.78796 | 944.901245  | 2 | 17 | 17.3528 | 3.80  |
| 46 | 36.36 | 38.64 | 86.3 HOXC11_FlexIII | 99.0 QISYPYSAQVPVPR                          | Gln->pyro-Glu @N-term; Label:13C(6)15N(4)(R) @ 14                                            | 0.00095303  | 1596.81848 | 799.4165 | 1596.81751 | 799.416077  | 2 | 15 | 18.5506 | 3.80  |
| 46 | 36.36 | 38.64 | 86.3 HOXC11_FlexIII | 99.0 GSCASNLVLPSCCTYYMPEFSTVFSFLPQAPSR       | Propionamide(C) @3; Deamidated(N) @6; Propionamide(C) @12; Label:13C(6)15N(4)(R) @32         | 0.0273764   | 3715.71802 | 1239.58  | 3715.69116 | 1239.57105  | 3 | 13 | 20.4524 | 3.80  |
| 46 | 36.36 | 38.64 | 86.3 HOXC11_FlexIII | 99.0 AEAGAEAEAEENTNPSSSGSAHSAVAKPAK          | Deamidated(N) @15; Label:13C(6)15N(2)(K) @27; Label:13C(6)15N(2)(K) @31                      | 0.0310881   | 3071.40845 | 1024.81  | 3071.37744 | 1024.79881  | 3 | 19 | 14.0952 | 3.80  |
| 46 | 36.36 | 38.64 | 86.3 HOXC11_FlexIII | 99.0 AEAGAEAEAEENTNPSSSGSAHSAVAKPAK          | Deamidated(N) @15; Label:13C(6)15N(2)(K) @27; Label:13C(6)15N(2)(K) @31                      | 0.0305024   | 3071.4126  | 615.2898 | 3071.37744 | 615.282776  | 5 | 18 | 14.2082 | 3.80  |
| 46 | 36.36 | 38.64 | 86.3 HOXC11_FlexIII | 99.0 AEAGAEAEAEENTNPSSSGSAHSAVAKPAK          | Deamidated(N) @15; Label:13C(6)15N(2)(K) @27; Label:13C(6)15N(2)(K) @31                      | 0.0329645   | 3071.41065 | 768.8599 | 3071.37744 | 768.851624  | 4 | 24 | 14.3116 | 3.80  |
| 46 | 36.36 | 38.64 | 86.3 HOXC11_FlexIII | 99.0 AEAGAEAEAEENTNPSSSGSAHSAVAKPAK          | Deamidated(N) @15; Label:13C(6)15N(2)(K) @27; Label:13C(6)15N(2)(K) @31                      | 0.0329645   | 3071.41065 | 768.8599 | 3071.37744 | 768.851624  | 4 | 18 | 14.5857 | 3.80  |
| 46 | 36.36 | 38.64 | 86.3 HOXC11_FlexIII | 99.0 DRLQYSGNPLLYPTFLYK                      | Label:13C(6)15N(4)(R) @2; Deamidated(N) @9; Label:13C(6)15N(2)(K) @19                        | 0.0264775   | 2353.23804 | 785.4199 | 2353.21143 | 785.411072  | 3 | 15 | 20.3844 | 3.80  |
| 46 | 36.36 | 38.64 | 86.3 HOXC11_FlexIII | 99.0 ECLPPSTVTEILMK                          | Propionamide(C) @2; Label:13C(6)15N(2)(K) @14                                                | -0.00018339 | 1638.84509 | 820.4298 | 1638.84522 | 820.429871  | 2 | 14 | 19.1063 | 3.80  |
| 46 | 36.36 | 38.64 | 86.3 HOXC11_FlexIII | 99.0 ECLPPSTVTEILMK                          | Propionamide(C) @2; Label:13C(6)15N(2)(K) @14                                                | -0.00177031 | 1638.84351 | 820.429  | 1638.84522 | 820.429871  | 2 | 14 | 19.3665 | 3.80  |
| 46 | 36.36 | 38.64 | 86.3 HOXC11_FlexIII | 99.0 ECLPPSTVTEILMK                          | Propionamide(C) @2; Oxidation(M) @13; Label:13C(6)15N(2)(K) @14                              | 0.00076203  | 1654.84082 | 828.4277 | 1654.84009 | 828.427368  | 2 | 13 | 18.5398 | 3.80  |
| 46 | 36.36 | 38.64 | 86.3 HOXC11_FlexIII | 99.0 ECLPPSTVTEILMK                          | Propionamide(C) @2; Label:13C(6)15N(2)(K) @14                                                | 6.07E-05    | 1638.84522 | 820.4299 | 1638.84522 | 820.429871  | 2 | 13 | 19.6408 | 3.80  |
| 46 | 36.36 | 38.64 | 86.3 HOXC11_FlexIII | 99.0 ECLPPSTVTEILMK                          | Propionamide(C) @2                                                                           | -0.00576505 | 1630.82532 | 816.4199 | 1630.83106 | 816.422791  | 2 | 12 | 19.1805 | 3.80  |
| 46 | 36.36 | 38.64 | 86.3 HOXC11_FlexIII | 99.0 ECLPPSTVTEILMK                          | Propionamide(C) @2; Label:13C(6)15N(2)(K) @14                                                | -0.00123931 | 1638.84412 | 820.4293 | 1638.84522 | 820.429871  | 2 | 10 | 19.2445 | 3.80  |
| 46 | 36.36 | 38.64 | 86.3 HOXC11_FlexIII | 99.0 ECLPPSTVTEILMK                          | Propionamide(C) @2; Label:13C(6)15N(2)(K) @14                                                | -0.0199588  | 1638.82532 | 820.4199 | 1638.84522 | 820.429871  | 2 | 11 | 19.9121 | 3.80  |
| 46 | 36.36 | 38.64 | 86.3 HOXC11_FlexIII | 99.0 ELERFFFFNVVINK                          | Label:13C(6)15N(4)(R) @4; Label:13C(6)15N(2)(K) @14                                          | -0.00082226 | 1864.94714 | 622.6563 | 1864.9478  | 622.656555  | 3 | 12 | 19.3053 | 3.80  |
| 46 | 36.36 | 38.64 | 86.3 HOXC11_FlexIII | 99.0 FFDNAYCGGGDPPAEPCCSGK                   | Propionamide(C) @7; Propionamide(C) @18; Label:13C(6)15N(2)(K) @21                           | -0.00164902 | 2277.95337 | 760.3251 | 2277.95508 | 760.325623  | 3 | 12 | 16.9575 | 3.80  |
| 46 | 36.36 | 38.64 | 86.3 HOXC11_FlexIII | 99.0 GEPEAPPASGLASR                          | Label:13C(6)15N(4)(R) @14                                                                    | -0.00065804 | 1347.66504 | 674.8398 | 1347.66577 | 674.84021   | 2 | 14 | 15.2101 | 3.80  |
| 46 | 36.36 | 38.64 | 86.3 HOXC11_FlexIII | 99.0 GSCASNLVLPSCCTYYMPEFSTVFSFLPQAPSR       | Propionamide(C) @3; Deamidated(N) @6; Propionamide(C) @12; Label:13C(6)15N(4)(R) @32         | 0.026806    | 3715.71802 | 1239.58  | 3715.69116 | 1239.57105  | 3 | 12 | 20.5391 | 3.80  |
| 46 | 36.36 | 38.64 | 86.3 HOXC11_FlexIII | 99.0 LQYFSGNPLLYPTFLYK                       | Deamidated(N) @7; Label:13C(6)15N(2)(K) @17                                                  | 0.0106553   | 2072.08545 | 1037.05  | 2072.07495 | 1037.0448   | 2 | 14 | 20.342  | 3.80  |
| 46 | 36.36 | 38.64 | 86.3 HOXC11_FlexIII | 99.0 NEGSYGGHHHPSAPHATPAGFYSSVVK             | Deamidated(N) @1; Label:13C(6)15N(2)(K) @27                                                  | 0.0277438   | 2814.29004 | 704.5798 | 2814.2627  | 704.572937  | 4 | 12 | 15.2021 | 3.80  |
| 46 | 36.36 | 38.64 | 86.3 HOXC11_FlexIII | 99.0 NSVLPOAFDR                              | Label:13C(6)15N(4)(R) @10                                                                    | -0.00135708 | 1155.58984 | 578.8022 | 1155.59119 | 578.802856  | 2 | 12 | 17.2716 | 3.80  |
| 46 | 36.36 | 38.64 | 86.3 HOXC11_FlexIII | 99.0 NSVLPOAFDR                              | Label:13C(6)15N(4)(R) @10                                                                    | -0.00160122 | 1155.58972 | 578.8021 | 1155.59119 | 578.802856  | 2 | 10 | 21.34   | 3.80  |
| 46 | 36.36 | 38.64 | 86.3 HOXC11_FlexIII | 99.0 NSVLPOAFDR                              | Label:13C(6)15N(4)(R) @10                                                                    | -0.00115137 | 1145.58191 | 573.7982 | 1145.58289 | 573.798767  | 2 | 11 | 17.3701 | 3.80  |
| 46 | 36.36 | 38.64 | 86.3 HOXC11_FlexIII | 99.0 NSVLPOAFDR                              | Deamidated(N) @1; Label:13C(6)15N(4)(R) @10                                                  | -0.00282807 | 1156.57251 | 579.2935 | 1156.5752  | 579.294861  | 2 | 11 | 17.8285 | 3.80  |
| 46 | 36.36 | 38.64 | 86.3 HOXC11_FlexIII | 99.0 NSVLPOAFDR                              | Label:13C(6)15N(4)(R) @10                                                                    | -0.0062399  | 1155.58484 | 578.7997 | 1155.59119 | 578.802856  | 2 | 9  | 21.0788 | 3.80  |
| 46 | 36.36 | 38.64 | 86.3 HOXC11_FlexIII | 99.0 NSYSSCYAAADELMHR                        | Propionamide(C) @6; Label:13C(6)15N(4)(R) @16                                                | 0.0091546   | 1897.80542 | 949.91   | 1897.79627 | 949.905396  | 2 | 17 | 17.2575 | 3.80  |
| 46 | 36.36 | 38.64 | 86.3 HOXC11_FlexIII | 99.0 NSYSSCYAAADELMHR                        | Propionamide(C) @6; Label:13C(6)15N(4)(R) @16                                                | 0.00285228  | 1897.79919 | 633.607  | 1897.79627 | 633.606018  | 3 | 16 | 17.5082 | 3.80  |
| 46 | 36.36 | 38.64 | 86.3 HOXC11_FlexIII | 99.0 NSYSSCYAAADELMHR                        | Propionamide(C) @6; Label:13C(6)15N(4)(R) @16                                                | 0.00622491  | 1897.80249 | 949.9085 | 1897.79627 | 949.905396  | 2 | 17 | 17.5359 | 3.80  |
| 46 | 36.36 | 38.64 | 86.3 HOXC11_FlexIII | 99.0 NSYSSCYAAADELMHR                        | Deamidated(N) @1; Propionamide(C) @6; Label:13C(6)15N(4)(R) @16                              | -0.00122753 | 1898.77905 | 950.3968 | 1898.78027 | 950.3974    | 2 | 19 | 17.7992 | 3.80  |
| 46 | 36.36 | 38.64 | 86.3 HOXC11_FlexIII | 99.0 NSYSSCYAAADELMHR                        | Propionamide(C) @6; Label:13C(6)15N(4)(R) @16                                                | -0.0187542  | 1897.77759 | 633.5998 | 1897.79627 | 633.606018  | 3 | 14 | 17.2334 | 3.80  |
| 46 | 36.36 | 38.64 | 86.3 HOXC11_FlexIII | 99.0 NSYSSCYAAADELMHR                        | Deamidated(N) @1; Propionamide(C) @6; Label:13C(6)15N(4)(R) @16                              | -0.0127178  | 1898.76758 | 633.9298 | 1898.78027 | 633.934021  | 3 | 13 | 17.7761 | 3.80  |
| 46 | 36.36 | 38.64 | 86.3 HOXC11_FlexIII | 99.0 NSYSSCYAAADELMHR                        | Propionamide(C) @6; Oxidation(M) @14; Label:13C(6)15N(4)(R) @16                              | 0.00642222  | 1913.79761 | 638.9398 | 1913.79114 | 638.937683  | 3 | 12 | 16.2652 | 3.80  |
| 46 | 36.36 | 38.64 | 86.3 HOXC11_FlexIII | 99.0 NSYSSCYAAADELMHR                        | Propionamide(C) @6; Oxidation(M) @14; Label:13C(6)15N(4)(R) @16                              | 0.0142504   | 1913.80542 | 957.91   | 1913.79114 | 957.902832  | 2 | 12 | 16.292  | 3.80  |
| 46 | 36.36 | 38.64 | 86.3 HOXC11_FlexIII | 99.0 QISYPYSAQVPVPR                          | Label:13C(6)15N(4)(R) @14                                                                    | -0.00057625 | 1613.84338 | 538.9551 | 1613.84412 | 538.955322  | 3 | 18 | 17.2965 | 3.80  |
| 46 | 36.36 | 38.64 | 86.3 HOXC11_FlexIII | 99.0 QISYPYSAQVPVPR                          | Gln->pyro-Glu @N-term; Label:13C(6)15N(4)(R) @14                                             | 0.0076669   | 1596.82532 | 799.4199 | 1596.81751 | 799.416077  | 2 | 15 | 18.2918 | 3.80  |
| 46 | 36.36 | 38.64 | 86.3 HOXC11_FlexIII | 99.0 QISYPYSAQVPVPR                          | Label:13C(6)15N(4)(R) @14                                                                    | -0.00075936 | 1613.84338 | 538.9551 | 1613.84412 | 538.955322  | 3 | 14 | 17.5567 | 3.80  |
| 46 | 36.36 | 38.64 | 86.3 HOXC11_FlexIII | 99.0 QISYPYSAQVPVPR                          | Label:13C(6)15N(4)(R) @14                                                                    | -0.00019435 | 1613.84412 | 807.9293 | 1613.84412 | 807.929321  | 2 | 14 | 17.7252 | 3.80  |
| 46 | 36.36 | 38.64 | 86.3 HOXC11_FlexIII | 99.0 QISYPYSAQVPVPR                          | Gln->pyro-Glu @N-term; Label:13C(6)15N(4)(R) @14                                             | -0.00148838 | 1596.81604 | 799.4153 | 1596.81751 | 799.416077  | 2 | 14 | 18.8284 | 3.80  |
| 46 | 36.36 | 38.64 | 86.3 HOXC11_FlexIII | 99.0 QISYPYSAQVPVPR                          | Label:13C(6)15N(4)(R) @14                                                                    | -0.00385646 | 1613.84033 | 807.9274 | 1613.84412 | 807.929321  | 2 | 13 | 17.1629 | 3.80  |
| 46 | 36.36 | 38.64 | 86.3 HOXC11_FlexIII | 99.0 QISYPYSAQVPVPR                          | Label:13C(6)15N(4)(R) @14                                                                    | -0.00165919 | 1613.84253 | 807.9285 | 1613.84412 | 807.929321  | 2 | 13 | 17.4582 | 3.80  |
| 46 | 36.36 | 38.64 | 86.3 HOXC11_FlexIII | 99.0 QISYPYSAQVPVPR                          | Gln->pyro-Glu @N-term; Label:13C(6)15N(4)(R) @14                                             | -0.0123526  | 1596.8053  | 799.4099 | 1596.81751 | 799.416077  | 2 | 11 | 21.3433 | 3.80  |
| 46 | 36.36 | 38.64 | 86.3 HOXC11_FlexIII | 99.0 QISYPYSAQVPVPR                          | Label:13C(6)15N(4)(R) @14                                                                    | -0.00059899 | 1603.83533 | 802.9249 | 1603.83582 | 802.925171  | 2 | 11 | 17.3296 | 3.80  |
| 46 | 36.36 | 38.64 | 86.3 HOXC11_FlexIII | 99.0 QISYPYSAQVPVPR                          | Label:13C(6)15N(4)(R) @14                                                                    | 0.00125481  | 1613.84522 | 538.9557 | 1613.84412 | 538.955322  | 3 | 11 | 17.8247 | 3.80  |
| 46 | 36.36 | 38.64 | 86.3 HOXC11_FlexIII | 99.0 QISYPYSAQVPVPR                          | Label:13C(6)15N(4)(R) @14                                                                    | 0.00114843  | 1613.84522 | 807.9299 | 1613.84412 | 807.929321  | 2 | 9  | 21.4669 | 3.80  |
| 46 | 36.36 | 38.64 | 86.3 HOXC11_FlexIII | 99.0 YPTFLYK                                 | Label:13C(6)15N(2)(K) @7                                                                     | -0.00165037 | 938.497681 | 470.2561 | 938.499329 | 470.256928  | 2 | 9  | 18.0092 | 3.80  |
| 46 | 36.36 | 38.64 | 86.3 HOXC11_FlexIII | 99.0 YPTFLYK                                 | Label:13C(6)15N(2)(K) @7                                                                     | 0.00020099  | 938.499451 | 470.257  | 938.499329 | 470.256928  | 2 | 9  | 17.9008 | 3.80  |
| 46 | 36.36 | 38.64 | 86.3 HOXC11_FlexIII | 99.0 YPTFLYK                                 | Label:13C(6)15N(2)(K) @7                                                                     | -0.00091407 | 938.498474 | 470.2565 | 938.499329 | 470.256928  | 2 | 9  | 17.7612 | 3.80  |
| 47 | 36.2  | 38.23 | 36.2 WAS_FlexIII    | 99.0 ADIGAPSGFK                              | Label:13C(6)15N(2)(K) @10                                                                    | -0.0016247  | 969.499451 | 485.757  | 969.50109  | 485.757813  | 2 | 12 | 15.8259 | 11.23 |
| 47 | 36.2  | 38.23 | 36.2 WAS_FlexIII    | 99.0 AGISEAQLTDAETSK                         | Label:13C(6)15N(2)(K) @15                                                                    | -0.00407022 | 1527.7467  | 764.8806 | 1527.75073 | 764.88269   | 2 | 17 | 16.0359 | 11.23 |
| 47 | 36.2  | 38.23 | 36.2 WAS_FlexIII    | 99.0 EHCAGVCFVK                              | Propionamide(C) @3; Propionamide(C) @7; Label:13C(6)15N(2)(K) @10                            | 0.00166751  | 1241.57922 | 621.7969 | 1241.57764 | 621.796082  | 2 | 14 | 15.4986 | 11.23 |
| 47 | 36.2  | 38.23 | 36.2 WAS_FlexIII    | 99.0 EHCAGVCFVKDNPQK                         | Propionamide(C) @3; Propionamide(C) @7; Label:13C(6)15N(2)(K) @10; Label:13C(6)15N(2)(K) @15 | -0.0168605  | 1831.85132 | 458.9701 | 1831.86804 | 458.974274  | 4 | 11 | 14.8421 | 11.23 |
| 47 | 36.2  | 38.23 | 36.2 WAS_FlexIII    | 99.0 GALLDOI                                 | Label:13C(6)15N(4)(R) @8                                                                     | 0.00928213  | 894.525696 | 448.2701 | 894.516235 | 448.265381  | 2 | 9  | 17.0394 | 11.23 |
| 47 | 36.2  | 38.23 | 36.2 WAS_FlexIII    | 99.0 GAPAVQQNPSTLQDHENQR                     | Deamidated(Q) @7; Label:13C(6)15N(4)(R) @21                                                  | 0.0268021   | 2326.18018 | 776.4007 | 2326.15405 | 776.391968  | 3 | 16 | 17.1944 | 11.23 |
| 47 | 36.2  | 38.23 | 36.2 WAS_FlexIII    | 99.0 GGPPPPPPPATGR                           | Label:13C(6)15N(4)(R) @13                                                                    | -0.00038626 | 1206.63806 | 604.3263 | 1206.63843 | 604.326538  | 2 | 11 | 14.2961 | 11.23 |
| 47 | 36.2  | 38.23 | 36.2 WAS_FlexIII    | 99.0 HVSHVGWDQNGFVDVNNLDPDLR                 | Deamidated(N) @16; Label:13C(6)15N(4)(R) @23                                                 | -0.00586529 | 2641.21265 | 661.3104 | 2641.21851 | 661.31189   | 4 | 12 | 18.5378 | 11.23 |
| 47 | 36.2  | 38.23 | 36.2 WAS_FlexIII    | 99.0 LYDFIEDQGLEAVR                          | Label:13C(6)15N(4)(R) @16                                                                    | -0.00682079 | 1846.92725 | 924.4709 | 1846.93408 | 924.6174304 | 2 | 18 | 19.2738 | 11.23 |
| 47 | 36.2  | 38.23 | 36.2 WAS_FlexIII    | 99.0 LYGLOAGR                                | Label:13C(6)15N(4)(R) @8                                                                     | -0.00089482 | 886.489075 | 444.2518 | 886.48999  | 444.252289  | 2 | 9  | 16.0562 | 11.23 |
| 47 | 36.2  | 38.23 | 36.2 WAS_FlexIII    | 99.0 QEPLPPPPPPPSR                           | Label:13C(6)15N(4)(R) @12                                                                    | -0.00148412 | 1320.70508 | 661.3598 | 1320.70854 | 661.360535  | 2 | 11 | 15.4638 | 11.23 |
| 47 | 36.2  | 38.23 | 36.2 WAS_FlexIII    | 99.0 QLPPPPPTPANER                           | Label:13C(6)15N(4)(R) @13                                                                    | 0.00726482  | 1454.7467  | 728.3806 | 1454.73926 | 728.376953  | 2 | 10 | 15.3991 | 11.23 |
| 47 | 36.2  | 38.23 | 36.2 WAS_FlexIII    | 99.0 RGGLPLPLPHGGDQGGPPVPLSLGLATVDIONPDITSSR | Label:13C(6)15N(4)(R) @1; Deamidated(Q) @15; Label:13C(6)15N(4)(R) @41                       | 0.0303385   | 4073.17    |          |            |             |   |    |         |       |

|    |       |       |                        |                                             |                                                                                                          |                            |             |            |          |            |            |   |    |         |       |
|----|-------|-------|------------------------|---------------------------------------------|----------------------------------------------------------------------------------------------------------|----------------------------|-------------|------------|----------|------------|------------|---|----|---------|-------|
| 47 | 36.2  | 38.23 | 36.2_WAS_FlexIII       | 99.0_YPTFLYK                                | Label:13C(6)15N(2)(K)@7                                                                                  | cleaved D-Y@N-term         | -0.00165037 | 938.497681 | 470.2561 | 938.499329 | 470.256928 | 2 | 9  | 18.0092 | 11.23 |
| 47 | 36.2  | 38.23 | 36.2_WAS_FlexIII       | 99.0_YPTFLYK                                | Label:13C(6)15N(2)(K)@7                                                                                  | cleaved D-Y@N-term         | 0.00020099  | 938.499451 | 470.257  | 938.499329 | 470.256928 | 2 | 9  | 17.9008 | 11.23 |
| 47 | 36.2  | 38.23 | 36.2_WAS_FlexIII       | 99.0_YPTFLYK                                | Label:13C(6)15N(2)(K)@7                                                                                  | cleaved D-Y@N-term         | -0.00091407 | 938.498474 | 470.2565 | 938.499329 | 470.256928 | 2 | 9  | 17.7612 | 11.23 |
| 48 | 36.13 | 38.14 | 49.0_TNFRSF10A_FlexIII | 99.0_AGTAGPGDALYAMLKM                       | Label:13C(6)15N(2)(K)@16                                                                                 |                            | -0.00038247 | 1573.77185 | 787.8932 | 1573.77234 | 787.893494 | 2 | 15 | 19.9649 | 12.24 |
| 48 | 36.13 | 38.14 | 49.0_TNFRSF10A_FlexIII | 99.0_AGTAGPGDALYAMLKMWNKTGR                 | Label:13C(6)15N(2)(K)@16; Label:13C(6)15N(2)(K)@20; Label:13C(6)15N(4)(R)@23                             |                            | 0.00031224  | 2433.25098 | 609.32   | 2433.25073 | 609.319846 | 4 | 14 | 20.3159 | 12.24 |
| 48 | 36.13 | 38.14 | 49.0_TNFRSF10A_FlexIII | 99.0_CTEGVGYTNASNLNFACLPCTACK               | Propionamide(C)@1; Propionamide(C)@17; Propionamide(C)@20; Propionamide(C)@23; Label:13C(6)15N(2)(K)@24  |                            | -0.0110354  | 2771.21533 | 1386.615 | 2771.22656 | 1386.62061 | 2 | 20 | 18.5874 | 12.24 |
| 48 | 36.13 | 38.14 | 49.0_TNFRSF10A_FlexIII | 99.0_EKIQDLLVDSGK                           | Label:13C(6)15N(2)(K)@2; Label:13C(6)15N(2)(K)@12                                                        | missed K-I@2               | 0.0033625   | 1359.76148 | 680.888  | 1359.75806 | 680.886292 | 2 | 15 | 17.1289 | 12.24 |
| 48 | 36.13 | 38.14 | 49.0_TNFRSF10A_FlexIII | 99.0_FANIVPFDSDQLMR                         | Label:13C(6)15N(4)(R)@15                                                                                 |                            | -0.00531358 | 1847.88513 | 924.9498 | 1847.89038 | 924.952454 | 2 | 12 | 20.3484 | 12.24 |
| 48 | 36.13 | 38.14 | 49.0_TNFRSF10A_FlexIII | 99.0_GALPTSMGQHGPSAR                        | Label:13C(6)15N(4)(R)@15                                                                                 |                            | 0.00110376  | 1475.71912 | 738.8668 | 1475.71719 | 738.866211 | 2 | 14 | 15.0002 | 12.24 |
| 48 | 36.13 | 38.14 | 49.0_TNFRSF10A_FlexIII | 99.0_IQDLLVDSGK                             | Label:13C(6)15N(2)(K)@10                                                                                 |                            | -0.00034072 | 1094.60584 | 548.3102 | 1094.60632 | 548.310425 | 2 | 12 | 17.1011 | 12.24 |
| 48 | 36.13 | 38.14 | 49.0_TNFRSF10A_FlexIII | 99.0_LHDQSIGTQQWEHSPGLGELCPPGSHR            | Propionamide(C)@20; Label:13C(6)15N(4)(R)@26                                                             |                            | -0.0010684  | 2989.41187 | 748.3602 | 2989.41284 | 748.360474 | 4 | 17 | 17.6544 | 12.24 |
| 48 | 36.13 | 38.14 | 49.0_TNFRSF10A_FlexIII | 99.0_NASHTLLDALER                           | Label:13C(6)15N(4)(R)@13                                                                                 |                            | -0.00113144 | 1461.78052 | 731.8975 | 1461.78149 | 731.89801  | 2 | 20 | 19.1821 | 12.24 |
| 48 | 36.13 | 38.14 | 49.0_TNFRSF10A_FlexIII | 99.0_NTACQCKPGTFR                           | Propionamide(C)@4; Propionamide(C)@6; Label:13C(6)15N(2)(K)@7; Label:13C(6)15N(4)(R)@12                  |                            | -0.00096483 | 1484.69751 | 743.356  | 1484.69836 | 743.356445 | 2 | 13 | 14.1561 | 12.24 |
| 48 | 36.13 | 38.14 | 49.0_TNFRSF10A_FlexIII | 99.0_QDLTKNEIDVVR                           | Gln->pyro-Glu@N-term; Label:13C(6)15N(2)(K)@6; Label:13C(6)15N(4)(R)@13                                  | missed K-N@6               | 0.00057883  | 1542.83789 | 772.4262 | 1542.83728 | 772.425903 | 2 | 20 | 18.2083 | 12.24 |
| 48 | 36.13 | 38.14 | 49.0_TNFRSF10A_FlexIII | 99.0_SDEEERSPCTTTR                          | Label:13C(6)15N(4)(R)@6; Propionamide(C)@9; Label:13C(6)15N(4)(R)@13                                     | missed R-S@6               | -0.00500998 | 1600.6853  | 801.3499 | 1600.69019 | 801.352356 | 2 | 13 | 9.945   | 12.24 |
| 48 | 36.13 | 38.14 | 49.0_TNFRSF10A_FlexIII | 99.0_VHKTFKVVVGVLLQVVPSSAAITK               | Label:13C(6)15N(2)(K)@3; Label:13C(6)15N(2)(K)@6; Deamidated(Q)@15; Label:13C(6)15N(2)(K)@25             | missed K-T@3; missed K-F@6 | -0.00126009 | 2691.61401 | 539.3301 | 2691.61523 | 539.330322 | 5 | 13 | 19.8598 | 12.24 |
| 48 | 36.13 | 38.14 | 49.0_TNFRSF10A_FlexIII | 99.0_VHLGAFLAVTPNPGSAASGTEAAAAATPSK         | Label:13C(6)15N(2)(K)@29                                                                                 |                            | -0.00257154 | 2700.39356 | 901.1385 | 2700.39624 | 901.139343 | 3 | 27 | 18.2702 | 12.24 |
| 48 | 36.13 | 38.14 | 49.0_TNFRSF10A_FlexIII | 99.0_VHLGAFLAVTPNPGSAASGTEAAAAATPSKVVGSSAGR | Label:13C(6)15N(2)(K)@29; Label:13C(6)15N(4)(R)@37                                                       |                            | -0.02713    | 3510.77026 | 878.6998 | 3510.79736 | 878.706665 | 4 | 20 | 18.2594 | 12.24 |
| 48 | 36.13 | 38.14 | 49.0_TNFRSF10A_FlexIII | 99.0_VKDCTPWSIDIECVHK                       | Label:13C(6)15N(2)(K)@2; Propionamide(C)@4; Propionamide(C)@12; Label:13C(6)15N(2)(K)@15                 | missed K-D@2               | -0.0181492  | 1916.89136 | 480.2301 | 1916.90955 | 480.23465  | 4 | 12 | 16.7952 | 12.24 |
| 48 | 36.13 | 38.14 | 49.0_TNFRSF10A_FlexIII | 99.0_NASHTLLDALERMEER                       | Label:13C(6)15N(4)(R)@13; Label:13C(6)15N(4)(R)@17                                                       | missed R-M@13              | -0.0183579  | 2016.99829 | 673.34   | 2017.01166 | 673.34613  | 3 | 10 | 20.0881 | 12.24 |
| 48 | 36.13 | 38.14 | 49.0_TNFRSF10A_FlexIII | 99.0_AGTAGPGDALYAMLKM                       | Label:13C(6)15N(2)(K)@16                                                                                 |                            | 0.0514974   | 1573.82385 | 787.9192 | 1573.77234 | 787.893494 | 2 | 11 | 20.1187 | 12.24 |
| 48 | 36.13 | 38.14 | 49.0_TNFRSF10A_FlexIII | 99.0_GALPTSMGQHGPSAR                        | Label:13C(6)15N(4)(R)@15                                                                                 |                            | 0.00144281  | 1475.71924 | 492.9137 | 1475.71719 | 492.913239 | 3 | 11 | 14.9791 | 12.24 |
| 48 | 36.13 | 38.14 | 49.0_TNFRSF10A_FlexIII | 99.0_GALPTSMGQHGPSAR                        |                                                                                                          |                            | -0.00248849 | 1465.70703 | 489.5763 | 1465.7096  | 489.577148 | 3 | 11 | 15.0903 | 12.24 |
| 48 | 36.13 | 38.14 | 49.0_TNFRSF10A_FlexIII | 99.0_LHDQSIGTQQWEHSPGLGELCPPGSHR            | Propionamide(C)@20; Label:13C(6)15N(4)(R)@26                                                             |                            | 0.00545347  | 2989.41724 | 997.4797 | 2989.41284 | 997.47821  | 3 | 18 | 17.4166 | 12.24 |
| 48 | 36.13 | 38.14 | 49.0_TNFRSF10A_FlexIII | 99.0_LHDQSIGTQQWEHSPGLGELCPPGSHR            | Deamidated(Q)@10; Propionamide(C)@20; Label:13C(6)15N(4)(R)@26                                           |                            | 0.0105785   | 2990.40772 | 997.8098 | 2990.39697 | 997.806213 | 3 | 19 | 17.6754 | 12.24 |
| 48 | 36.13 | 38.14 | 49.0_TNFRSF10A_FlexIII | 99.0_LHDQSIGTQQWEHSPGLGELCPPGSHR            | Propionamide(C)@20; Label:13C(6)15N(4)(R)@26                                                             |                            | -0.00051572 | 2989.41235 | 598.8898 | 2989.41284 | 598.889832 | 5 | 13 | 17.629  | 12.24 |
| 48 | 36.13 | 38.14 | 49.0_TNFRSF10A_FlexIII | 99.0_LHDQSIGTQQWEHSPGLGELCPPGSHR            | Deamidated(Q)@10; Propionamide(C)@20; Label:13C(6)15N(4)(R)@26                                           |                            | 0.0170549   | 2990.41406 | 599.0901 | 2990.39697 | 599.08667  | 5 | 12 | 17.3632 | 12.24 |
| 48 | 36.13 | 38.14 | 49.0_TNFRSF10A_FlexIII | 99.0_LHDQSIGTQQWEHSPGLGELCPPGSHR            | Deamidated(Q)@10; Propionamide(C)@20; Label:13C(6)15N(4)(R)@26                                           |                            | 0.0136946   | 2990.41065 | 748.6099 | 2990.39697 | 748.606506 | 4 | 12 | 17.3929 | 12.24 |
| 48 | 36.13 | 38.14 | 49.0_TNFRSF10A_FlexIII | 99.0_NASHTLLDALER                           | Label:13C(6)15N(4)(R)@13                                                                                 |                            | 0.00695908  | 1461.78845 | 488.2701 | 1461.78149 | 488.267792 | 3 | 12 | 19.1516 | 12.24 |
| 48 | 36.13 | 38.14 | 49.0_TNFRSF10A_FlexIII | 99.0_NTACQCKPGTFR                           | Propionamide(C)@4; Deamidated(Q)@5; Propionamide(C)@6; Label:13C(6)15N(2)(K)@7; Label:13C(6)15N(4)(R)@12 |                            | 0.00293396  | 1485.6853  | 743.8499 | 1485.68237 | 743.84845  | 2 | 13 | 14.5393 | 12.24 |
| 48 | 36.13 | 38.14 | 49.0_TNFRSF10A_FlexIII | 99.0_NTACQCKPGTFR                           | Propionamide(C)@4; Propionamide(C)@6; Label:13C(6)15N(2)(K)@7; Label:13C(6)15N(4)(R)@12                  |                            | 0.00696974  | 1484.70532 | 743.3599 | 1484.69836 | 743.356445 | 2 | 12 | 13.8932 | 12.24 |
| 48 | 36.13 | 38.14 | 49.0_TNFRSF10A_FlexIII | 99.0_NTACQCKPGTFR                           | Propionamide(C)@4; Propionamide(C)@6; Label:13C(6)15N(2)(K)@7; Label:13C(6)15N(4)(R)@12                  |                            | -0.00035112 | 1484.69788 | 495.9066 | 1484.69836 | 495.906708 | 3 | 10 | 14.1333 | 12.24 |
| 48 | 36.13 | 38.14 | 49.0_TNFRSF10A_FlexIII | 99.0_QDLTKNEIDVVR                           | Label:13C(6)15N(2)(K)@6; Label:13C(6)15N(4)(R)@13                                                        |                            | 0.0014839   | 1559.86523 | 780.9399 | 1559.86377 | 780.939148 | 2 | 16 | 17.0667 | 12.24 |
| 48 | 36.13 | 38.14 | 49.0_TNFRSF10A_FlexIII | 99.0_QDLTKNEIDVVR                           | Gln->pyro-Glu@N-term; Label:13C(6)15N(2)(K)@6; Label:13C(6)15N(4)(R)@13                                  | missed K-N@6               | 0.00802511  | 1542.84522 | 772.4299 | 1542.83728 | 772.425903 | 2 | 17 | 18.4682 | 12.24 |
| 48 | 36.13 | 38.14 | 49.0_TNFRSF10A_FlexIII | 99.0_SDEEERSPCTTTR                          | Label:13C(6)15N(4)(R)@6; Propionamide(C)@9; Label:13C(6)15N(4)(R)@13                                     | missed R-S@6               | -0.00177176 | 1600.6886  | 534.5701 | 1600.69019 | 534.570679 | 3 | 10 | 9.8659  | 12.24 |
| 48 | 36.13 | 38.14 | 49.0_TNFRSF10A_FlexIII | 99.0_SDEEERSPCTTTR                          | Label:13C(6)15N(4)(R)@6; Propionamide(C)@9; Label:13C(6)15N(4)(R)@13                                     | missed R-S@6               | 0.0002424   | 1600.69019 | 534.5707 | 1600.69019 | 534.570679 | 3 | 10 | 10.1225 | 12.24 |
| 48 | 36.13 | 38.14 | 49.0_TNFRSF10A_FlexIII | 99.0_SDEEERSPCTTTR                          | Label:13C(6)15N(4)(R)@6; Propionamide(C)@9; Label:13C(6)15N(4)(R)@13                                     | missed R-S@6               | -0.00177176 | 1600.6886  | 534.5701 | 1600.69019 | 534.570679 | 3 | 9  | 9.6081  | 12.24 |
| 48 | 36.13 | 38.14 | 49.0_TNFRSF10A_FlexIII | 99.0_SDEEERSPCTTTR                          | Label:13C(6)15N(4)(R)@6; Propionamide(C)@9; Label:13C(6)15N(4)(R)@13                                     | missed R-S@6               | -0.00177176 | 1600.6886  | 534.5701 | 1600.69019 | 534.570679 | 3 | 9  | 10.6351 | 12.24 |
| 48 | 36.13 | 38.14 | 49.0_TNFRSF10A_FlexIII | 99.0_VHKTFKVVVGVLLQVVPSSAAITK               | Label:13C(6)15N(2)(K)@3; Label:13C(6)15N(2)(K)@6; Deamidated(Q)@15; Label:13C(6)15N(2)(K)@25             | missed K-T@3; missed K-F@6 | 0.0354187   | 2691.65088 | 673.92   | 2691.61523 | 673.911133 | 4 | 13 | 19.8662 | 12.24 |
| 48 | 36.13 | 38.14 | 49.0_TNFRSF10A_FlexIII | 99.0_VHLGAFLAVTPNPGSAASGTEAAAAATPSK         | Deamidated(N)@12; Label:13C(6)15N(2)(K)@29                                                               |                            | 0.0305054   | 2701.41089 | 676.36   | 2701.38037 | 676.352356 | 4 | 23 | 18.0983 | 12.24 |
| 48 | 36.13 | 38.14 | 49.0_TNFRSF10A_FlexIII | 99.0_VHLGAFLAVTPNPGSAASGTEAAAAATPSK         | Label:13C(6)15N(2)(K)@29                                                                                 |                            | 0.00816728  | 2700.40332 | 1351.209 | 2700.39624 | 1351.20544 | 2 | 34 | 18.1025 | 12.24 |
| 48 | 36.13 | 38.14 | 49.0_TNFRSF10A_FlexIII | 99.0_VHLGAFLAVTPNPGSAASGTEAAAAATPSK         | Deamidated(N)@12; Label:13C(6)15N(2)(K)@29                                                               |                            | 0.00730868  | 2701.38745 | 901.4698 | 2701.38037 | 901.467346 | 3 | 22 | 18.5442 | 12.24 |
| 48 | 36.13 | 38.14 | 49.0_TNFRSF10A_FlexIII | 99.0_VHLGAFLAVTPNPGSAASGTEAAAAATPSK         | Deamidated(N)@12; Label:13C(6)15N(2)(K)@29                                                               |                            | 0.00730868  | 2701.38745 | 901.4698 | 2701.38037 | 901.467346 | 3 | 17 | 20.9492 | 12.24 |
| 48 | 36.13 | 38.14 | 49.0_TNFRSF10A_FlexIII | 99.0_VHLGAFLAVTPNPGSAASGTEAAAAATPSK         | Deamidated(N)@12; Label:13C(6)15N(2)(K)@29                                                               |                            | 0.00730868  | 2701.38745 | 901.4698 | 2701.38037 | 901.467346 | 3 | 20 | 21.2943 | 12.24 |
| 48 | 36.13 | 38.14 | 49.0_TNFRSF10A_FlexIII | 99.0_VHLGAFLAVTPNPGSAASGTEAAAAATPSK         | Label:13C(6)15N(2)(K)@29                                                                                 |                            | 0.00145677  | 2700.39746 | 901.1398 | 2700.39624 | 901.139343 | 3 | 21 | 21.586  | 12.24 |
| 48 | 36.13 | 38.14 | 49.0_TNFRSF10A_FlexIII | 99.0_VHLGAFLAVTPNPGSAASGTEAAAAATPSK         | Deamidated(N)@12; Label:13C(6)15N(2)(K)@29                                                               |                            | 0.00730868  | 2701.38745 | 901.4698 | 2701.38037 | 901.467346 | 3 | 24 | 26.5844 | 12.24 |
| 48 | 36.13 | 38.14 | 49.0_TNFRSF10A_FlexIII | 99.0_VHLGAFLAVTPNPGSAASGTEAAAAATPSK         | Label:13C(6)15N(2)(K)@29                                                                                 |                            | 0.00145677  | 2700.39746 | 901.1398 | 2700.39624 | 901.139343 | 3 | 25 | 26.5911 | 12.24 |
| 48 | 36.13 | 38.14 | 49.0_TNFRSF10A_FlexIII | 99.0_VHLGAFLAVTPNPGSAASGTEAAAAATPSK         | Deamidated(N)@12; Label:13C(6)15N(2)(K)@29                                                               |                            | 0.00730868  | 2701.38745 | 901.4698 | 2701.38037 | 901.467346 | 3 | 15 | 17.7238 | 12.24 |
| 48 | 36.13 | 38.14 | 49.0_TNFRSF10A_FlexIII | 99.0_VHLGAFLAVTPNPGSAASGTEAAAAATPSK         | Deamidated(N)@12; Label:13C(6)15N(2)(K)@29                                                               |                            | 0.00730868  | 2701.38745 | 901.4698 | 2701.38037 | 901.467346 | 3 | 11 | 19.0381 | 12.24 |
| 48 | 36.13 | 38.14 | 49.0_TNFRSF10A_FlexIII | 99.0_VHLGAFLAVTPNPGSAASGTEAAAAATPSKVVGSSAGR | Deamidated(N)@12; Label:13C(6)15N(2)(K)@29; Label:13C(6)15N(4)(R)@37                                     |                            |             |            |          |            |            |   |    |         |       |
| 48 | 36.13 | 38.14 | 49.0_TNFRSF10A_FlexIII | 99.0_YPTFLYK                                | Label:13C(6)15N(2)(K)@7                                                                                  | missed K-V@29              | 0.0255935   | 3511.80811 | 1171.61  | 3511.78149 | 1171.60107 | 3 | 20 | 18.3503 | 12.24 |
| 48 | 36.13 | 38.14 | 49.0_TNFRSF10A_FlexIII | 99.0_YPTFLYK                                | Label:13C(6)15N(2)(K)@7                                                                                  | cleaved E-Y@N-term         | -0.00165037 | 938.497681 | 470.2561 | 938.499329 | 470.256928 | 2 | 9  | 18.0092 | 12.24 |
| 48 | 36.13 | 38.14 | 49.0_TNFRSF10A_FlexIII | 99.0_YPTFLYK                                | Label:13C(6)15N(2)(K)@7                                                                                  | cleaved E-Y@N-term         | 0.00020099  | 938.499451 | 470.257  | 938.499329 | 470.256928 | 2 | 9  | 17.9008 | 12.24 |
| 48 | 36.13 | 38.14 | 49.0_TNFRSF10A_FlexIII | 99.0_YPTFLYK                                | Label:13C(6)15N(2)(K)@7                                                                                  | cleaved E-Y@N-term         | -0.00091407 | 938.498474 | 470.2565 | 938.499329 | 470.256928 | 2 | 9  | 17.7612 | 12.24 |
| 49 | 33.63 | 37.69 | 49.1_TDG_FlexIII       | 99.0_AQDKVHYHYK                             | Label:13C(6)15N(2)(K)@4; Label:13C(6)15N(2)(K)@10                                                        | missed K-V@4               | -0.00344372 | 1279.68604 | 640.8503 | 1279.68958 | 640.852051 | 2 | 15 | 14.6498 | 7.02  |
| 49 | 33.63 | 37.69 | 49.1_TDG_FlexIII       | 99.0_CIEYFSK                                | Propionamide(C)@1; Label:13C(6)15N(2)(K)@8                                                               |                            | 0.00173239  | 1080.54224 | 541.2784 | 1080.54053 | 541.277527 | 2 | 10 | 18.2186 |       |

|    |       |       |                   |                               |                                                                                                                             |                            |             |            |          |            |            |   |    |         |       |
|----|-------|-------|-------------------|-------------------------------|-----------------------------------------------------------------------------------------------------------------------------|----------------------------|-------------|------------|----------|------------|------------|---|----|---------|-------|
| 49 | 33.63 | 37.69 | 49.1 TDG_FlexIII  | 99.0 AYPFTFLYK                | Label: 13C(6)15N(2)(K)@8                                                                                                    | cleaved H-A@N-term         | -0.0009432  | 1009.53546 | 505.775  | 1009.53644 | 505.775482 | 2 | 10 | 17.6256 | 7.02  |
| 49 | 33.63 | 37.69 | 49.1 TDG_FlexIII  | 99.0 AYPFTFLYK                | Label: 13C(6)15N(2)(K)@8                                                                                                    | cleaved H-A@N-term         | -0.00137045 | 1009.5351  | 505.7748 | 1009.53644 | 505.775482 | 2 | 10 | 17.9068 | 7.02  |
| 49 | 33.63 | 37.69 | 49.1 TDG_FlexIII  | 99.0 AYPFTFLYK                | Label: 13C(6)15N(2)(K)@8                                                                                                    | cleaved H-A@N-term         | 0.00784765  | 1009.54425 | 505.7794 | 1009.53644 | 505.775482 | 2 | 9  | 17.9276 | 7.02  |
| 49 | 33.63 | 37.69 | 49.1 TDG_FlexIII  | 99.0 CLFMSGSLGSEVLNHHMDHTLPKG | Propionamide(C)@1; Deamidated(Q)@11; Label: 13C(6)15N(2)(K)@23                                                              |                            | 0.00311817  | 2651.23023 | 884.7507 | 2651.2273  | 884.749695 | 3 | 13 | 18.4926 | 7.02  |
| 49 | 33.63 | 37.69 | 49.1 TDG_FlexIII  | 99.0 FNGVSEAEALLTK            | Deamidated(N)@2; Label: 13C(6)15N(2)(K)@12                                                                                  |                            | 0.00156678  | 1315.67664 | 658.8456 | 1315.67505 | 658.844849 | 2 | 12 | 17.8185 | 7.02  |
| 49 | 33.63 | 37.69 | 49.1 TDG_FlexIII  | 99.0 GHHPYGPNGNHFVK           | Label: 13C(6)15N(2)(K)@13                                                                                                   |                            | -0.00051661 | 1540.71973 | 386.1872 | 1540.72034 | 386.187378 | 4 | 10 | 15.5846 | 7.02  |
| 49 | 33.63 | 37.69 | 49.1 TDG_FlexIII  | 99.0 IPDTETLYCGMPSSSAR        | Propionamide(C)@8; Label: 13C(6)15N(4)(R)@17                                                                                |                            | 0.00392857  | 1907.86731 | 954.9409 | 1907.86328 | 954.938904 | 2 | 14 | 17.535  | 7.02  |
| 49 | 33.63 | 37.69 | 49.1 TDG_FlexIII  | 99.0 KVDRFNGVSEAEALLTK        | Label: 13C(6)15N(2)(K)@1; Label: 13C(6)15N(4)(R)@4; Deamidated(N)@6; Label: 13C(6)15N(2)(K)@16                              | missed K-V@1; missed R-F@4 | 7.46E-05    | 1831.98901 | 611.6703 | 1831.98901 | 611.670288 | 3 | 13 | 17.2274 | 7.02  |
| 49 | 33.63 | 37.69 | 49.1 TDG_FlexIII  | 99.0 KVDRFNGVSEAEALLTK        | Label: 13C(6)15N(2)(K)@1; Label: 13C(6)15N(4)(R)@4; Deamidated(N)@6; Label: 13C(6)15N(2)(K)@16                              | missed K-V@1; missed R-F@4 | 0.0222173   | 1832.01135 | 459.0101 | 1831.98901 | 459.004517 | 4 | 11 | 17.0568 | 7.02  |
| 49 | 33.63 | 37.69 | 49.1 TDG_FlexIII  | 99.0 NLEFGLQPHK               | Label: 13C(6)15N(2)(K)@10                                                                                                   |                            | -0.00088345 | 1189.63269 | 397.5515 | 1189.63355 | 397.551788 | 3 | 10 | 16.8704 | 7.02  |
| 49 | 33.63 | 37.69 | 49.1 TDG_FlexIII  | 99.0 NMDVQEVQYTFDLQLAQEDAK    | Deamidated(Q)@5; Label: 13C(6)15N(2)(K)@21                                                                                  |                            | 0.0219858   | 2493.16724 | 1247.591 | 2493.146   | 1247.58032 | 2 | 21 | 19.3744 | 7.02  |
| 49 | 33.63 | 37.69 | 49.1 TDG_FlexIII  | 99.0 NMDVQEVQYTFDLQLAQEDAKK   | Deamidated(Q)@5; Label: 13C(6)15N(2)(K)@21; Label: 13C(6)15N(2)(K)@22                                                       | missed K-K@21              | 0.0331612   | 2629.28735 | 1315.651 | 2629.25513 | 1315.63489 | 2 | 21 | 18.8869 | 7.02  |
| 49 | 33.63 | 37.69 | 49.1 TDG_FlexIII  | 99.0 NMDVQEVQYTFDLQLAQEDAKK   | Deamidated(Q)@8; Label: 13C(6)15N(2)(K)@21; Label: 13C(6)15N(2)(K)@22                                                       | missed K-K@21              | 0.0372854   | 2629.29248 | 658.3304 | 2629.25513 | 658.321106 | 4 | 18 | 18.9474 | 7.02  |
| 49 | 33.63 | 37.69 | 49.1 TDG_FlexIII  | 99.0 NMDVQEVQYTFDLQLAQEDAKK   | Deamidated(Q)@8; Label: 13C(6)15N(2)(K)@21; Label: 13C(6)15N(2)(K)@22                                                       | missed K-K@21              | 0.0151427   | 2629.27026 | 877.4307 | 2629.25513 | 877.42572  | 3 | 17 | 19.103  | 7.02  |
| 49 | 33.63 | 37.69 | 49.1 TDG_FlexIII  | 99.0 YGIGFTNMVVER             | Label: 13C(6)15N(4)(R)@11                                                                                                   |                            | 0.00543933  | 1295.62622 | 648.8204 | 1295.62073 | 648.817688 | 2 | 13 | 18.2205 | 7.02  |
| 49 | 33.63 | 37.69 | 49.1 TDG_FlexIII  | 99.0 YPTFLYK                  | Label: 13C(6)15N(2)(K)@7                                                                                                    | cleaved A-Y@N-term         | -0.00165037 | 938.497681 | 470.2561 | 938.499329 | 470.256928 | 2 | 9  | 18.0092 | 7.02  |
| 49 | 33.63 | 37.69 | 49.1 TDG_FlexIII  | 99.0 YPTFLYK                  | Label: 13C(6)15N(2)(K)@7                                                                                                    | cleaved A-Y@N-term         | 0.00020099  | 938.499451 | 470.257  | 938.499329 | 470.256928 | 2 | 9  | 17.9008 | 7.02  |
| 49 | 33.63 | 37.69 | 49.1 TDG_FlexIII  | 99.0 YPTFLYK                  | Label: 13C(6)15N(2)(K)@7                                                                                                    | cleaved A-Y@N-term         | -0.00091407 | 938.498474 | 470.2565 | 938.499329 | 470.256928 | 2 | 9  | 17.7612 | 7.02  |
| 51 | 32.48 | 34.57 | 50.0 WNT2_FlexIII | 99.0 AISQGVAEWTAECQHQFR       | Propionamide(C)@13; Label: 13C(6)15N(4)(R)@18                                                                               |                            | -0.00422042 | 2140.99463 | 714.6721 | 2140.99878 | 714.673523 | 3 | 14 | 17.5884 | 11.83 |
| 51 | 32.48 | 34.57 | 50.0 WNT2_FlexIII | 99.0 CHGVSGSCTLR              | Propionamide(C)@1; Propionamide(C)@8                                                                                        |                            | 0.00821097  | 1260.57849 | 421.2001 | 1260.57031 | 421.197388 | 3 | 13 | 13.7619 | 11.83 |
| 51 | 32.48 | 34.57 | 50.0 WNT2_FlexIII | 99.0 CDDCLEALDVHTCK           | Propionamide(C)@1; Propionamide(C)@4; Propionamide(C)@13; Label: 13C(6)15N(2)(K)@14                                         |                            | -0.0107114  | 1797.78333 | 899.8999 | 1797.79395 | 899.904236 | 2 | 18 | 16.6159 | 11.83 |
| 51 | 32.48 | 34.57 | 50.0 WNT2_FlexIII | 99.0 DREAGSLGTAGR             | Label: 13C(6)15N(4)(R)@2; Label: 13C(6)15N(4)(R)@12                                                                         | missed R-E@2               | -0.0126299  | 1208.58838 | 403.8701 | 1208.6012  | 403.874359 | 3 | 14 | 12.5844 | 11.83 |
| 51 | 32.48 | 34.57 | 50.0 WNT2_FlexIII | 99.0 ESAFVYAISSAGVVFATR       | Label: 13C(6)15N(4)(R)@19                                                                                                   |                            | -0.00200955 | 1997.04785 | 666.6899 | 1997.04981 | 666.690552 | 3 | 18 | 20.5716 | 11.83 |
| 51 | 32.48 | 34.57 | 50.0 WNT2_FlexIII | 99.0 FKPKTKNDLVVFENSPDYCIR    | Label: 13C(6)15N(2)(K)@2; Label: 13C(6)15N(2)(K)@3; Label: 13C(6)15N(2)(K)@6; Propionamide(C)@19; Label: 13C(6)15N(4)(R)@25 | missed K-K@2; missed K-N@6 | 0.00272928  | 2681.36865 | 671.3494 | 2681.36133 | 671.347595 | 4 | 14 | 17.1939 | 11.83 |
| 51 | 32.48 | 34.57 | 50.0 WNT2_FlexIII | 99.0 GIFDWGGCSNDIYGIK         | Propionamide(C)@8; Label: 13C(6)15N(2)(K)@17                                                                                |                            | -0.00810936 | 1937.86292 | 969.9387 | 1937.87097 | 969.942749 | 2 | 21 | 19.6886 | 11.83 |
| 51 | 32.48 | 34.57 | 50.0 WNT2_FlexIII | 99.0 GMDSCVEMCCGR             | Propionamide(C)@5; Propionamide(C)@9; Propionamide(C)@10; Label: 13C(6)15N(4)(R)@12                                         |                            | -0.00105612 | 1512.55164 | 757.2831 | 1512.55273 | 757.28363  | 2 | 15 | 15.7827 | 11.83 |
| 51 | 32.48 | 34.57 | 50.0 WNT2_FlexIII | 99.0 KYNGAIQVVMQDGTGFTVANER   | Label: 13C(6)15N(2)(K)@1; Deamidated(N)@11; Label: 13C(6)15N(4)(R)@23                                                       | missed K-Y@1               | 0.0110255   | 2530.23511 | 844.419  | 2530.22412 | 844.415283 | 3 | 20 | 17.906  | 11.83 |
| 51 | 32.48 | 34.57 | 50.0 WNT2_FlexIII | 99.0 NDLVVFENSPDYCIR          | Propionamide(C)@13; Label: 13C(6)15N(4)(R)@15                                                                               |                            | -0.00117658 | 1927.86389 | 964.9392 | 1927.86499 | 964.939758 | 2 | 19 | 18.5763 | 11.83 |
| 51 | 32.48 | 34.57 | 50.0 WNT2_FlexIII | 99.0 TCWLAMADFRK              | Propionamide(C)@2; Label: 13C(6)15N(4)(R)@10; Label: 13C(6)15N(2)(K)@11                                                     | missed R-K@10              | -0.00039364 | 1429.69629 | 477.5727 | 1429.69653 | 477.572784 | 3 | 11 | 18.505  | 11.83 |
| 51 | 32.48 | 34.57 | 50.0 WNT2_FlexIII | 99.0 VMCDNVPLGVSSQR           | Propionamide(C)@3; Label: 13C(6)15N(4)(R)@14                                                                                |                            | -0.00218944 | 1584.76062 | 793.3876 | 1584.76282 | 793.388672 | 2 | 18 | 16.9441 | 11.83 |
| 51 | 32.48 | 34.57 | 50.0 WNT2_FlexIII | 99.0 WNCNTLDRDHSLFGR          | Propionamide(C)@3; Label: 13C(6)15N(4)(R)@8; Label: 13C(6)15N(4)(R)@15                                                      | missed R-D@8               | -0.00844223 | 1923.88294 | 962.9487 | 1923.89136 | 962.952942 | 2 | 17 | 17.0912 | 11.83 |
| 51 | 32.48 | 34.57 | 50.0 WNT2_FlexIII | 99.0 AISQGVAEWTAECQHQFR       | Deamidated(Q)@4; Propionamide(C)@13; Label: 13C(6)15N(4)(R)@18                                                              |                            | 0.0194781   | 2142.00147 | 1072.008 | 2141.98291 | 1071.99866 | 2 | 14 | 17.6017 | 11.83 |
| 51 | 32.48 | 34.57 | 50.0 WNT2_FlexIII | 99.0 AISQGVAEWTAECQHQFR       | Propionamide(C)@13; Label: 13C(6)15N(4)(R)@18                                                                               |                            | -0.00238937 | 2140.99634 | 714.6727 | 2140.99878 | 714.673523 | 3 | 13 | 17.849  | 11.83 |
| 51 | 32.48 | 34.57 | 50.0 WNT2_FlexIII | 99.0 AISQGVAEWTAECQHQFR       | Propionamide(C)@13                                                                                                          |                            | 0.00578357  | 2130.99634 | 711.3394 | 2130.99048 | 711.337463 | 3 | 12 | 17.6497 | 11.83 |
| 51 | 32.48 | 34.57 | 50.0 WNT2_FlexIII | 99.0 CHGVSGSCTLR              | Propionamide(C)@1; Propionamide(C)@8; Label: 13C(6)15N(4)(R)@11                                                             |                            | 0.00040423  | 1270.57898 | 424.5336 | 1270.57861 | 424.533478 | 3 | 12 | 13.6712 | 11.83 |
| 51 | 32.48 | 34.57 | 50.0 WNT2_FlexIII | 99.0 CHGVSGSCTLR              | Propionamide(C)@1; Propionamide(C)@8; Label: 13C(6)15N(4)(R)@11                                                             |                            | 0.00592371  | 1270.58472 | 636.2996 | 1270.57861 | 636.29657  | 2 | 12 | 13.6915 | 11.83 |
| 51 | 32.48 | 34.57 | 50.0 WNT2_FlexIII | 99.0 CDDCLEALDVHTCK           | Propionamide(C)@1; Propionamide(C)@4; Propionamide(C)@13; Label: 13C(6)15N(2)(K)@14                                         |                            | -0.00091105 | 1797.79297 | 600.2716 | 1797.79395 | 600.271912 | 3 | 19 | 16.5742 | 11.83 |
| 51 | 32.48 | 34.57 | 50.0 WNT2_FlexIII | 99.0 CDDCLEALDVHTCK           | Propionamide(C)@1; Propionamide(C)@4; Propionamide(C)@13; Label: 13C(6)15N(2)(K)@14                                         |                            | -0.00200968 | 1797.79175 | 600.2712 | 1797.79395 | 600.271912 | 3 | 14 | 16.8426 | 11.83 |
| 51 | 32.48 | 34.57 | 50.0 WNT2_FlexIII | 99.0 DREAGSLGTAGR             | Label: 13C(6)15N(4)(R)@2; Label: 13C(6)15N(4)(R)@12                                                                         | missed R-E@2               | 0.00344863  | 1208.60461 | 605.3096 | 1208.6012  | 605.307922 | 2 | 12 | 12.3495 | 11.83 |
| 51 | 32.48 | 34.57 | 50.0 WNT2_FlexIII | 99.0 DREAGSLGTAGR             | Label: 13C(6)15N(4)(R)@2; Label: 13C(6)15N(4)(R)@12                                                                         | missed R-E@2               | 0.00344863  | 1208.60461 | 605.3096 | 1208.6012  | 605.307922 | 2 | 17 | 12.6113 | 11.83 |
| 51 | 32.48 | 34.57 | 50.0 WNT2_FlexIII | 99.0 DREAGSLGTAGR             | Label: 13C(6)15N(4)(R)@2; Label: 13C(6)15N(4)(R)@12                                                                         | missed R-E@2               | 4.34E-06    | 1208.60132 | 403.8744 | 1208.6012  | 403.874359 | 3 | 13 | 12.865  | 11.83 |
| 51 | 32.48 | 34.57 | 50.0 WNT2_FlexIII | 99.0 DREAGSLGTAGR             | Label: 13C(6)15N(4)(R)@2; Label: 13C(6)15N(4)(R)@12                                                                         | missed R-E@2               | -0.0126299  | 1208.58838 | 403.8701 | 1208.6012  | 403.874359 | 3 | 12 | 12.3125 | 11.83 |
| 51 | 32.48 | 34.57 | 50.0 WNT2_FlexIII | 99.0 ESAFVYAISSAGVVFATR       | Label: 13C(6)15N(4)(R)@19                                                                                                   |                            | -0.00259843 | 1997.04712 | 999.5308 | 1997.04981 | 999.532166 | 2 | 19 | 20.53   | 11.83 |
| 51 | 32.48 | 34.57 | 50.0 WNT2_FlexIII | 99.0 ESAFVYAISSAGVVFATR       | Label: 13C(6)15N(4)(R)@19                                                                                                   |                            | 0.00239445  | 1997.052   | 666.6913 | 1997.04981 | 666.690552 | 3 | 20 | 20.5426 | 11.83 |
| 51 | 32.48 | 34.57 | 50.0 WNT2_FlexIII | 99.0 ESAFVYAISSAGVVFATR       | Label: 13C(6)15N(4)(R)@19                                                                                                   |                            | 0.00052381  | 1997.05029 | 999.5324 | 1997.04981 | 999.532166 | 2 | 21 | 20.5276 | 11.83 |
| 51 | 32.48 | 34.57 | 50.0 WNT2_FlexIII | 99.0 ESAFVYAISSAGVVFATR       | Label: 13C(6)15N(4)(R)@19                                                                                                   |                            | -8.65E-05   | 1997.04968 | 999.5321 | 1997.04981 | 999.532166 | 2 | 16 | 26.4393 | 11.83 |
| 51 | 32.48 | 34.57 | 50.0 WNT2_FlexIII | 99.0 ESAFVYAISSAGVVFATR       | Label: 13C(6)15N(4)(R)@19                                                                                                   |                            | -0.00133356 | 1997.04858 | 666.6901 | 1997.04981 | 666.690552 | 3 | 17 | 26.4534 | 11.83 |
| 51 | 32.48 | 34.57 | 50.0 WNT2_FlexIII | 99.0 ESAFVYAISSAGVVFATR       | Label: 13C(6)15N(4)(R)@19                                                                                                   |                            | -0.00035214 | 1997.04944 | 666.6904 | 1997.04981 | 666.690552 | 3 | 11 | 26.4807 | 11.83 |
| 51 | 32.48 | 34.57 | 50.0 WNT2_FlexIII | 99.0 FKPKTKNDLVVFENSPDYCIR    | Label: 13C(6)15N(2)(K)@2; Label: 13C(6)15N(2)(K)@3; Label: 13C(6)15N(2)(K)@6; Propionamide(C)@19; Label: 13C(6)15N(4)(R)@25 | missed K-K@2; missed K-N@6 | 0.00147063  | 2681.36255 | 537.2798 | 2681.36133 | 537.279541 | 5 | 11 | 17.2433 | 11.83 |
| 51 | 32.48 | 34.57 | 50.0 WNT2_FlexIII | 99.0 GIFDWGGCSNDIYGIK         | Propionamide(C)@8; Deamidated(N)@11; Label: 13C(6)15N(2)(K)@17                                                              |                            | 0.0278919   | 1938.88294 | 970.4487 | 1938.85498 | 970.434753 | 2 | 12 | 19.4273 | 11.83 |
| 51 | 32.48 | 34.57 | 50.0 WNT2_FlexIII | 99.0 KYNGAIQVVMQDGTGFTVANER   | Label: 13C(6)15N(2)(K)@1; Deamidated(N)@3; Label: 13C(6)15N(4)(R)@23                                                        | missed K-Y@1               | 0.0110255   | 2530.23511 | 844.419  | 2530.22412 | 844.415283 | 3 | 20 | 18.1768 | 11.83 |
| 51 | 32.48 | 34.57 | 50.0 WNT2_FlexIII | 99.0 VMCDNVPLGVSSQR           | Propionamide(C)@3; Label: 13C(6)15N(4)(R)@14                                                                                |                            | -0.00145702 | 1584.76123 | 793.3879 | 1584.76282 | 793.388672 | 2 | 18 | 17.2025 | 11.83 |
| 51 | 32.48 | 34.57 | 50.0 WNT2_FlexIII | 99.0 VMCDNVPLGVSSQR           | Propionamide(C)@3; Label: 13C(6)15N(4)(R)@14                                                                                |                            | -0.00508441 | 1584.75769 | 529.2598 | 1584.76282 | 529.261536 | 3 | 13 | 16.9709 | 11.83 |
| 51 | 32.48 | 34.57 | 50.0 WNT2_FlexIII | 99.0 VMCDNVPLGVSSQR           | Propionamide(C)@3; Label: 13C(6)15N(4)(R)@14                                                                                |                            | 0.00098438  | 1584.76392 | 793.3892 | 1584.76282 | 793.388672 | 2 | 12 | 12.6414 | 11.83 |
| 51 | 32.48 | 34.57 | 50.0 WNT2_FlexIII | 99.0 VMCDNVPLGVSSQR           | Propionamide(C)@3; Label: 13C(6)15N(4)(R)@14                                                                                |                            | 0.00098438  | 1584.76392 | 793.3892 | 1584.76282 | 793.388672 | 2 | 10 | 21.3856 | 11.83 |
| 51 | 32.48 | 34.57 | 50.0 WNT2_FlexIII | 99.0 VMCDNVPLGVSSQR           | Propionamide(C)@3; Deamidated(N)@5                                                                                          |                            | 0.0252612   | 1575.76392 | 788.8892 | 1575.73853 | 788.876526 | 2 | 11 | 17.0206 | 11.83 |
| 51 | 32.48 | 34.57 | 50.0 WNT2_FlexIII | 99.0 YPTFLYK                  | Label: 13C(6)15N(2)(K)@7                                                                                                    | cleaved T-Y@N-term         | -0.00165037 | 938.497681 | 470.2561 | 938.499329 | 470.256928 | 2 | 9  | 1       |       |

|    |       |       |                    |                                      |                                                                                             |                     |             |            |          |            |            |   |    |         |      |
|----|-------|-------|--------------------|--------------------------------------|---------------------------------------------------------------------------------------------|---------------------|-------------|------------|----------|------------|------------|---|----|---------|------|
| 52 | 31.37 | 33.43 | 67.9 MMP28_FlexIII | 99.0 LTFFGQDHDNGLGNAFDGPGGALAHAFLLPR | Label: 13C(6)15N(4)(R)@30                                                                   |                     | 0.00088385  | 3121.50464 | 781.3834 | 3121.50342 | 781.383118 | 4 | 20 | 20.0899 | 2.09 |
| 52 | 31.37 | 33.43 | 67.9 MMP28_FlexIII | 99.0 NLFVLAHEIGHTLGLTHSPAPR          | Label: 13C(6)15N(4)(R)@23                                                                   |                     | -0.00033689 | 2488.35742 | 830.4598 | 2488.35791 | 830.4599   | 3 | 18 | 20.4428 | 2.09 |
| 52 | 31.37 | 33.43 | 67.9 MMP28_FlexIII | 99.0 RGEAHFDQDER                     | Label: 13C(6)15N(4)(R)@1; Label: 13C(6)15N(4)(R)@11                                         | missed R-G @1       | -0.00801413 | 1378.60486 | 690.3097 | 1378.61292 | 690.313721 | 2 | 16 | 10.6436 | 2.09 |
| 52 | 31.37 | 33.43 | 67.9 MMP28_FlexIII | 99.0 WVGLPNIEAAAVSLNDGDFYFFK         | Deamidated(N) @7; Label: 13C(6)15N(2)(K)@24                                                 |                     | 0.0305585   | 2678.34546 | 1340.18  | 2678.3147  | 1340.16467 | 2 | 18 | 20.5692 | 2.09 |
| 52 | 31.37 | 33.43 | 67.9 MMP28_FlexIII | 99.0 YCHSSFDAITVDR                   | Propionamide(C) @2; Label: 13C(6)15N(4)(R)@13                                               |                     | -0.00051288 | 1593.7113  | 532.2444 | 1593.71216 | 532.244629 | 3 | 15 | 16.5278 | 2.09 |
| 52 | 31.37 | 33.43 | 67.9 MMP28_FlexIII | 99.0 YGYLNEQPKV                      | Label: 13C(6)15N(2)(K)@10                                                                   |                     | -0.00077507 | 1217.61646 | 609.8155 | 1217.61719 | 609.815857 | 2 | 12 | 16.5093 | 2.09 |
| 52 | 31.37 | 33.43 | 67.9 MMP28_FlexIII | 99.0 AFQWVSQLPVGVLDR                 | Label: 13C(6)15N(4)(R)@16                                                                   |                     | 0.00444011  | 1810.96484 | 906.4897 | 1810.96057 | 906.487549 | 2 | 19 | 20.0702 | 2.09 |
| 52 | 31.37 | 33.43 | 67.9 MMP28_FlexIII | 99.0 CGVTDTSNYSAAWAER                | Propionamide(C) @1; Deamidated(N) @7; Label: 13C(6)15N(4)(R)@15                             |                     | 0.0110133   | 1724.74512 | 863.3798 | 1724.73401 | 863.374268 | 2 | 18 | 17.2857 | 2.09 |
| 52 | 31.37 | 33.43 | 67.9 MMP28_FlexIII | 99.0 CGVTDTSNYSAAWAER                | Propionamide(C) @7; Label: 13C(6)15N(4)(R)@15                                               |                     | -0.00082105 | 1723.74902 | 862.8818 | 1723.75    | 862.882263 | 2 | 20 | 17.3523 | 2.09 |
| 52 | 31.37 | 33.43 | 67.9 MMP28_FlexIII | 99.0 GRNLFVLAHEIGHTLGLTHSPAPR        | Label: 13C(6)15N(4)(R)@2; Label: 13C(6)15N(4)(R)@25                                         | missed R-N @2       | 0.0232657   | 2711.51196 | 543.3097 | 2711.48877 | 543.304993 | 5 | 14 | 20.5054 | 2.09 |
| 52 | 31.37 | 33.43 | 67.9 MMP28_FlexIII | 99.0 KEAEAFLEK                       | Label: 13C(6)15N(2)(K)@1; Label: 13C(6)15N(2)(K)@9                                          | missed K-E @1       | 0.0036202   | 1079.58691 | 360.8696 | 1079.58337 | 360.868408 | 3 | 10 | 15.5043 | 2.09 |
| 52 | 31.37 | 33.43 | 67.9 MMP28_FlexIII | 99.0 LTFFGQDHDNGLGNAFDGPGGALAHAFLLPR | Deamidated(N) @14; Label: 13C(6)15N(4)(R)@30                                                |                     | 0.00246427  | 3122.49023 | 781.6298 | 3122.48731 | 781.62915  | 4 | 18 | 19.8303 | 2.09 |
| 52 | 31.37 | 33.43 | 67.9 MMP28_FlexIII | 99.0 LTFFGQDHDNGLGNAFDGPGGALAHAFLLPR | Label: 13C(6)15N(4)(R)@30                                                                   |                     | 0.00426039  | 3121.5083  | 1041.51  | 3121.50342 | 1041.50842 | 3 | 24 | 19.8631 | 2.09 |
| 52 | 31.37 | 33.43 | 67.9 MMP28_FlexIII | 99.0 LTFFGQDHDNGLGNAFDGPGGALAHAFLLPR | Deamidated(N) @14; Label: 13C(6)15N(4)(R)@30                                                |                     | 0.00246427  | 3122.49023 | 781.6298 | 3122.48731 | 781.62915  | 4 | 8  | 26.7006 | 2.09 |
| 52 | 31.37 | 33.43 | 67.9 MMP28_FlexIII | 99.0 NLFVLAHEIGHTLGLTHSPAPR          | Label: 13C(6)15N(4)(R)@23                                                                   |                     | 0.00401844  | 2488.36206 | 498.6797 | 2488.35791 | 498.678833 | 5 | 12 | 20.479  | 2.09 |
| 52 | 31.37 | 33.43 | 67.9 MMP28_FlexIII | 99.0 NLFVLAHEIGHTLGLTHSPAPR          | Deamidated(N) @1; Label: 13C(6)15N(4)(R)@23                                                 |                     | 0.0277132   | 2489.36963 | 623.3497 | 2489.3418  | 623.342712 | 4 | 12 | 20.3888 | 2.09 |
| 52 | 31.37 | 33.43 | 67.9 MMP28_FlexIII | 99.0 RGEAHFDQDER                     | Label: 13C(6)15N(4)(R)@1; Label: 13C(6)15N(4)(R)@11                                         | missed R-G @1       | 0.0141831   | 1378.62695 | 460.5496 | 1378.61292 | 460.544891 | 3 | 13 | 10.4333 | 2.09 |
| 52 | 31.37 | 33.43 | 67.9 MMP28_FlexIII | 99.0 RGEAHFDQDER                     | Label: 13C(6)15N(4)(R)@1; Label: 13C(6)15N(4)(R)@11                                         | missed R-G @1       | 0.0141831   | 1378.62695 | 460.5496 | 1378.61292 | 460.544891 | 3 | 12 | 10.6106 | 2.09 |
| 52 | 31.37 | 33.43 | 67.9 MMP28_FlexIII | 99.0 RGEAHFDQDER                     | Label: 13C(6)15N(4)(R)@1; Label: 13C(6)15N(4)(R)@11                                         | missed R-G @1       | -0.0157547  | 1378.59705 | 460.5396 | 1378.61292 | 460.544891 | 3 | 12 | 10.9508 | 2.09 |
| 52 | 31.37 | 33.43 | 67.9 MMP28_FlexIII | 99.0 RGEAHFDQDER                     | Label: 13C(6)15N(4)(R)@1; Label: 13C(6)15N(4)(R)@11                                         | missed R-G @1       | -0.00801413 | 1378.60486 | 690.3097 | 1378.61292 | 690.313721 | 2 | 7  | 10.3842 | 2.09 |
| 52 | 31.37 | 33.43 | 67.9 MMP28_FlexIII | 99.0 RGEAHFDQDER                     | Label: 13C(6)15N(4)(R)@1; Deamidated(Q) @8; Label: 13C(6)15N(4)(R)@11                       | missed R-G @1       | -0.0120489  | 1379.58484 | 690.7997 | 1379.58692 | 690.805725 | 2 | 8  | 12.7154 | 2.09 |
| 52 | 31.37 | 33.43 | 67.9 MMP28_FlexIII | 99.0 RGEAHFDQDER                     | Label: 13C(6)15N(4)(R)@1; Label: 13C(6)15N(4)(R)@11                                         | missed R-G @1       | -0.00194981 | 1378.61096 | 345.66   | 1378.61292 | 345.660492 | 4 | 8  | 10.5346 | 2.09 |
| 52 | 31.37 | 33.43 | 67.9 MMP28_FlexIII | 99.0 WVGLPNIEAAAVSLNDGDFYFFK         | Deamidated(N) @7; Label: 13C(6)15N(2)(K)@24                                                 |                     | 0.0326141   | 2678.34717 | 893.7897 | 2678.3147  | 893.77887  | 3 | 16 | 20.5992 | 2.09 |
| 52 | 31.37 | 33.43 | 67.9 MMP28_FlexIII | 99.0 YCHSSFDAITVDR                   | Propionamide(C) @2; Label: 13C(6)15N(4)(R)@13                                               |                     | 0.0012157   | 1593.7135  | 797.864  | 1593.71216 | 797.863342 | 2 | 17 | 16.5602 | 2.09 |
| 52 | 31.37 | 33.43 | 67.9 MMP28_FlexIII | 99.0 YCHSSFDAITVDR                   | Propionamide(C) @2; Label: 13C(6)15N(4)(R)@13                                               |                     | -0.0149782  | 1593.69702 | 532.2396 | 1593.71216 | 532.244629 | 3 | 14 | 16.7888 | 2.09 |
| 52 | 31.37 | 33.43 | 67.9 MMP28_FlexIII | 99.0 YPTFLYK                         | Label: 13C(6)15N(2)(K)@7                                                                    | cleaved V-Y @N-term | -0.00165037 | 938.497681 | 470.2561 | 938.499329 | 470.256928 | 2 | 9  | 18.0092 | 2.09 |
| 52 | 31.37 | 33.43 | 67.9 MMP28_FlexIII | 99.0 YPTFLYK                         | Label: 13C(6)15N(2)(K)@7                                                                    | cleaved V-Y @N-term | 0.00020099  | 938.499451 | 470.257  | 938.499329 | 470.256928 | 2 | 9  | 17.9008 | 2.09 |
| 52 | 31.37 | 33.43 | 67.9 MMP28_FlexIII | 99.0 YPTFLYK                         | Label: 13C(6)15N(2)(K)@7                                                                    | cleaved V-Y @N-term | -0.00091407 | 938.498474 | 470.2565 | 938.499329 | 470.256928 | 2 | 9  | 17.7612 | 2.09 |
| 53 | 31.04 | 33.33 | 61.1 IRF3_FlexIII  | 99.0 AGOWLWAQR                       | Label: 13C(6)15N(4)(R)@9                                                                    |                     | 0.00142227  | 1124.5769  | 563.2957 | 1124.57564 | 563.295044 | 2 | 12 | 18.3448 | 5.45 |
| 53 | 31.04 | 33.33 | 61.1 IRF3_FlexIII  | 99.0 DGGQCAHVQGLGR                   | Propionamide(C) @5; Label: 13C(6)15N(4)(R)@14                                               |                     | -0.00989144 | 1474.68762 | 738.3511 | 1474.69751 | 738.356018 | 2 | 22 | 14.9135 | 5.45 |
| 53 | 31.04 | 33.33 | 61.1 IRF3_FlexIII  | 99.0 DKPDLPTWKR                      | Label: 13C(6)15N(2)(K)@2; Label: 13C(6)15N(2)(K)@9; Label: 13C(6)15N(4)(R)@10               | missed K-R @9       | -0.0030102  | 1280.70581 | 427.9092 | 1280.70874 | 427.910187 | 3 | 10 | 15.8359 | 5.45 |
| 53 | 31.04 | 33.33 | 61.1 IRF3_FlexIII  | 99.0 EGGVFDLPGPIVGSWAPR              | Label: 13C(6)15N(4)(R)@18                                                                   |                     | -0.0208315  | 1912.95032 | 957.4824 | 1912.97107 | 957.492798 | 2 | 19 | 20.4669 | 5.45 |
| 53 | 31.04 | 33.33 | 61.1 IRF3_FlexIII  | 99.0 GRQVFQQTISCEGLR                 | Label: 13C(6)15N(4)(R)@2; Label: 13C(6)15N(4)(R)@16                                         | missed R-Q @2       | 0.015983    | 1908.99023 | 955.5024 | 1908.97424 | 955.494446 | 2 | 20 | 16.6773 | 5.45 |
| 53 | 31.04 | 33.33 | 61.1 IRF3_FlexIII  | 99.0 HGLRQDAQOEDFGIFQAWAEATGAYVGR    | Label: 13C(6)15N(4)(R)@4; Deamidated(Q) @16; Label: 13C(6)15N(4)(R)@29                      | missed R-N @4       | 0.00356245  | 3238.53687 | 810.6415 | 3238.53345 | 810.640625 | 4 | 18 | 20.2095 | 5.45 |
| 53 | 31.04 | 33.33 | 61.1 IRF3_FlexIII  | 99.0 ILPWLVSQLDLGOLEGVAWVVK          | Label: 13C(6)15N(2)(K)@22                                                                   |                     | -0.0192563  | 2485.36328 | 829.4617 | 2485.38232 | 829.468079 | 3 | 20 | 20.4912 | 5.45 |
| 53 | 31.04 | 33.33 | 61.1 IRF3_FlexIII  | 99.0 LGHCHTYVAVSEELLPSNGHGDPEVPKDK   | Propionamide(C) @4; Deamidated(N) @17; Label: 13C(6)15N(2)(K)@28; Label: 13C(6)15N(2)(K)@30 | missed K-D @28      | 0.0318202   | 3359.61719 | 672.9307 | 3359.58521 | 672.924316 | 5 | 12 | 17.3079 | 5.45 |
| 53 | 31.04 | 33.33 | 61.1 IRF3_FlexIII  | 99.0 LLVPGEEWEFEVTAfYR               | Label: 13C(6)15N(4)(R)@17                                                                   |                     | -0.00230208 | 2094.03125 | 1048.023 | 2094.03369 | 1048.02417 | 2 | 17 | 20.375  | 5.45 |
| 53 | 31.04 | 33.33 | 61.1 IRF3_FlexIII  | 99.0 LVSGSEVGR                       | Label: 13C(6)15N(4)(R)@9                                                                    |                     | 0.00139488  | 940.486694 | 471.2506 | 940.485352 | 471.249393 | 2 | 9  | 14.3172 | 5.45 |
| 53 | 31.04 | 33.33 | 61.1 IRF3_FlexIII  | 99.0 QDAQQEDFGIFQAWAEATGAYVGR        | Label: 13C(6)15N(4)(R)@25                                                                   |                     | -0.0309086  | 2764.24463 | 922.4222 | 2764.27564 | 922.432495 | 3 | 23 | 20.4471 | 5.45 |
| 53 | 31.04 | 33.33 | 61.1 IRF3_FlexIII  | 99.0 QVFQQTISCEGLR                   | Gln->pyro-Glu @N-term; Propionamide(C) @9; Label: 13C(6)15N(4)(R)@14                        |                     | -0.00351295 | 1668.81348 | 835.414  | 1668.8169  | 835.41571  | 2 | 14 | 18.4616 | 5.45 |
| 53 | 31.04 | 33.33 | 61.1 IRF3_FlexIII  | 99.0 SPSLDNPTFPNGLPSENPLKR           | Label: 13C(6)15N(2)(K)@21; Label: 13C(6)15N(4)(R)@22                                        | missed K-R @21      | -0.00724135 | 2394.22266 | 799.0815 | 2394.22974 | 799.083862 | 3 | 21 | 18.4012 | 5.45 |
| 53 | 31.04 | 33.33 | 61.1 IRF3_FlexIII  | 99.0 SSWCASNPVPVPHLNQYPTFLYK         | Propionamide(C) @4; Label: 13C(6)15N(2)(K)@23                                               |                     | 0.00371656  | 2764.33472 | 922.4522 | 2764.33106 | 922.450989 | 3 | 13 | 17.7655 | 5.45 |
| 53 | 31.04 | 33.33 | 61.1 IRF3_FlexIII  | 99.0 TLTTLCPLVLCGGVMAPGPAVDQEAR      | Propionamide(C) @6; Propionamide(C) @11; Label: 13C(6)15N(4)(R)@26                          |                     | -0.00426641 | 2763.39526 | 1382.705 | 2763.39966 | 1382.70715 | 2 | 27 | 19.5752 | 5.45 |
| 53 | 31.04 | 33.33 | 61.1 IRF3_FlexIII  | 99.0 DGGQCAHVQGLGR                   | Propionamide(C) @5; Label: 13C(6)15N(4)(R)@14                                               |                     | -0.00128761 | 1474.69629 | 492.5727 | 1474.69751 | 492.57309  | 3 | 13 | 14.924  | 5.45 |
| 53 | 31.04 | 33.33 | 61.1 IRF3_FlexIII  | 99.0 DGGQCAHVQGLGR                   | Propionamide(C) @5; Label: 13C(6)15N(4)(R)@14                                               |                     | 0.00072874  | 1474.69824 | 738.3564 | 1474.69751 | 738.356018 | 2 | 17 | 15.1912 | 5.45 |
| 53 | 31.04 | 33.33 | 61.1 IRF3_FlexIII  | 99.0 DGGQCAHVQGLGR                   | Deamidated(Q) @3; Propionamide(C) @5                                                        |                     | 0.0136636   | 1465.68701 | 489.5696 | 1465.67322 | 489.565002 | 3 | 10 | 14.9876 | 5.45 |
| 53 | 31.04 | 33.33 | 61.1 IRF3_FlexIII  | 99.0 ILPWLVSQLDLGOLEGVAWVVK          | Deamidated(Q) @8; Label: 13C(6)15N(2)(K)@22                                                 |                     | 0.00726503  | 2486.37329 | 1244.194 | 2486.36646 | 1244.19055 | 2 | 21 | 20.4803 | 5.45 |
| 53 | 31.04 | 33.33 | 61.1 IRF3_FlexIII  | 99.0 ILPWLVSQLDLGOLEGVAWVVK          | Deamidated(Q) @13; Label: 13C(6)15N(2)(K)@22                                                |                     | 0.00585685  | 2486.37207 | 622.6003 | 2486.36646 | 622.598877 | 4 | 13 | 20.5476 | 5.45 |
| 53 | 31.04 | 33.33 | 61.1 IRF3_FlexIII  | 99.0 ILPWLVSQLDLGOLEGVAWVVK          | Label: 13C(6)15N(2)(K)@22                                                                   |                     | -0.00872553 | 2485.37329 | 1243.694 | 2485.38232 | 1243.69849 | 2 | 26 | 20.6031 | 5.45 |
| 53 | 31.04 | 33.33 | 61.1 IRF3_FlexIII  | 99.0 ILPWLVSQLDLGOLEGVAWVVK          | Label: 13C(6)15N(2)(K)@22                                                                   |                     | -0.0192563  | 2485.36328 | 829.4617 | 2485.38232 | 829.468079 | 3 | 13 | 21.0467 | 5.45 |
| 53 | 31.04 | 33.33 | 61.1 IRF3_FlexIII  | 99.0 ILPWLVSQLDLGOLEGVAWVVK          | Label: 13C(6)15N(2)(K)@22                                                                   |                     | 0.01059     | 2485.39307 | 829.4716 | 2485.38232 | 829.468079 | 3 | 19 | 26.5156 | 5.45 |
| 53 | 31.04 | 33.33 | 61.1 IRF3_FlexIII  | 99.0 ILPWLVSQLDLGOLEGVAWVVK          | Deamidated(Q) @13; Label: 13C(6)15N(2)(K)@22                                                |                     | 0.0113192   | 2486.37793 | 829.7999 | 2486.36646 | 829.796082 | 3 | 14 | 20.5733 | 5.45 |
| 53 | 31.04 | 33.33 | 61.1 IRF3_FlexIII  | 99.0 LLVPGEEWEFEVTAfYR               | Label: 13C(6)15N(4)(R)@17                                                                   |                     | 0.00700366  | 2094.04077 | 699.0209 | 2094.03369 | 699.018555 | 3 | 17 | 20.3943 | 5.45 |
| 53 | 31.04 | 33.33 | 61.1 IRF3_FlexIII  | 99.0 LLVPGEEWEFEVTAfYR               | Label: 13C(6)15N(4)(R)@17                                                                   |                     | -0.00230208 | 2094.03125 | 1048.023 | 2094.03369 | 1048.02417 | 2 | 14 | 20.6361 | 5.45 |
| 53 | 31.04 | 33.33 | 61.1 IRF3_FlexIII  | 99.0 QDAQQEDFGIFQAWAEATGAYVGR        | Deamidated(Q) @12; Label: 13C(6)15N(4)(R)@25                                                |                     | 0.0158765   | 2765.27539 | 1383.645 | 2765.25977 | 1383.63709 | 2 | 24 | 20.4516 | 5.45 |
| 53 | 31.04 | 33.33 | 61.1 IRF3_FlexIII  | 99.0 QVFQQTISCEGLR                   | Propionamide(C) @9; Label: 13C(6)15N(4)(R)@14                                               |                     | 0.00544286  | 1685.84888 | 843.9317 | 1685.84351 | 843.929016 | 2 | 13 | 17.1162 | 5.45 |
| 53 | 31.04 | 33.33 | 61.1 IRF3_FlexIII  | 99.0 QVFQQTISCEGLR                   | Deamidated(Q) @5; Propionamide(C) @9; Label: 13C(6)15N(4)(R)@14                             |                     | 0.0214334   | 1686.84888 | 844.4317 | 1686.82752 | 844.421021 | 2 | 11 | 17.3875 | 5.45 |
| 53 | 31.04 | 33.33 | 61.1 IRF3_FlexIII  | 99.0 SPSLDNPTFPNGLPSENPLKR           | Deamidated(N) @12; Label: 13C(6)15N(2)(K)@21; Label: 13C(6)15N(4)(R)@22                     | missed K-R @21      | 0.0286468   | 2395.24243 | 799.4214 | 2395.21387 | 799.411965 | 3 | 13 | 18.1319 | 5.45 |

|    |       |       |                    |                                              |                                                                                          |                               |             |            |          |            |            |   |    |         |       |
|----|-------|-------|--------------------|----------------------------------------------|------------------------------------------------------------------------------------------|-------------------------------|-------------|------------|----------|------------|------------|---|----|---------|-------|
| 57 | 27.77 | 29.91 | 42.0 MAPK9_FlexIII | 99.0 EHAIEEWKELIYK                           | Label: 13C(6)15N(2)(K)@8; Label: 13C(6)15N(2)(K)@13                                      | missed K-E @8                 | -0.00530003 | 1702.88489 | 852.4497 | 1702.89014 | 852.452332 | 2 | 18 | 17.9615 | 2.36  |
| 57 | 27.77 | 29.91 | 42.0 MAPK9_FlexIII | 99.0 ELVLKL                                  | Label: 13C(6)15N(2)(K)@6                                                                 |                               | -0.00130834 | 721.48169  | 361.7481 | 721.48291  | 361.748749 | 2 | 7  | 17.5105 | 2.36  |
| 57 | 27.77 | 29.91 | 42.0 MAPK9_FlexIII | 99.0 HPYITVWYDPAEAEAPPPQIYDAQLEER            | Deamidated(Q)@19; Label: 13C(6)15N(4)(R)@28                                              |                               | 0.00390148  | 3308.55811 | 1103.86  | 3308.5542  | 1103.85864 | 3 | 16 | 18.8948 | 2.36  |
| 57 | 27.77 | 29.91 | 42.0 MAPK9_FlexIII | 99.0 ILDFGLAR                                | Label: 13C(6)15N(4)(R)@8                                                                 |                               | -0.00119613 | 913.524902 | 457.7697 | 913.526062 | 457.770325 | 2 | 9  | 18.3946 | 2.36  |
| 57 | 27.77 | 29.91 | 42.0 MAPK9_FlexIII | 99.0 LSRPFQNGTHAK                            | Label: 13C(6)15N(4)(R)@3; Label: 13C(6)15N(2)(K)@12                                      |                               | -0.014258   | 1443.75574 | 482.2592 | 1443.77014 | 482.264008 | 3 | 13 | 13.5412 | 2.36  |
| 57 | 27.77 | 29.91 | 42.0 MAPK9_FlexIII | 99.0 LSRPFQNGTHAKR                           | Label: 13C(6)15N(4)(R)@3; Label: 13C(6)15N(2)(K)@12; Label: 13C(6)15N(4)(R)@13           | missed K-R @12                | -0.0134555  | 1609.86597 | 537.6293 | 1609.87952 | 537.633789 | 3 | 10 | 12.8031 | 2.36  |
| 57 | 27.77 | 29.91 | 42.0 MAPK9_FlexIII | 99.0 MLVIDPKDR                               | Label: 13C(6)15N(2)(K)@8; Label: 13C(6)15N(4)(R)@9                                       | missed K-R @8                 | -0.0017819  | 1103.61096 | 368.8776 | 1103.61279 | 368.878204 | 3 | 9  | 16.2956 | 2.36  |
| 57 | 27.77 | 29.91 | 42.0 MAPK9_FlexIII | 99.0 TACTNFMMTPIYVVTR                        | Propionamide(C)@3; Label: 13C(6)15N(4)(R)@15                                             |                               | -0.00196218 | 1814.83752 | 605.9531 | 1814.83936 | 605.953735 | 3 | 15 | 18.5857 | 2.36  |
| 57 | 27.77 | 29.91 | 42.0 MAPK9_FlexIII | 99.0 VIEQLGTPSAEFMK                          | Label: 13C(6)15N(2)(K)@14                                                                |                               | 0.00458964  | 1556.80444 | 779.4095 | 1556.79993 | 779.407288 | 2 | 16 | 17.7564 | 2.36  |
| 57 | 27.77 | 29.91 | 42.0 MAPK9_FlexIII | 99.0 YPGIKFEELFPDWIFFPSESERDK                | Label: 13C(6)15N(2)(K)@5; Label: 13C(6)15N(4)(R)@21; Label: 13C(6)15N(2)(K)@23           | missed K-F @5; missed R-D @21 | 0.00246439  | 2854.40894 | 714.6095 | 2854.40649 | 714.608887 | 4 | 17 | 20.1934 | 2.36  |
| 57 | 27.77 | 29.91 | 42.0 MAPK9_FlexIII | 99.0 CDSQFYSVQVADSTFTVLKR                    | Propionamide(C)@1; Deamidated(Q)@9; Label: 13C(6)15N(2)(K)@19; Label: 13C(6)15N(4)(R)@20 | missed K-R @19                | 0.0285841   | 2383.17725 | 795.3997 | 2383.14844 | 795.390076 | 3 | 17 | 18.6055 | 2.36  |
| 57 | 27.77 | 29.91 | 42.0 MAPK9_FlexIII | 99.0 CDSQFYSVQVADSTFTVLKR                    | Propionamide(C)@1; Deamidated(Q)@4; Label: 13C(6)15N(2)(K)@19; Label: 13C(6)15N(4)(R)@20 | missed K-R @19                | 0.0269748   | 2383.17554 | 795.3991 | 2383.14844 | 795.390076 | 3 | 14 | 18.6989 | 2.36  |
| 57 | 27.77 | 29.91 | 42.0 MAPK9_FlexIII | 99.0 DLKPSNIIVK                              | Label: 13C(6)15N(2)(K)@3; Label: 13C(6)15N(2)(K)@10                                      |                               | -0.00249585 | 1127.68591 | 376.9026 | 1127.68848 | 376.903442 | 3 | 11 | 15.7204 | 2.36  |
| 57 | 27.77 | 29.91 | 42.0 MAPK9_FlexIII | 99.0 EHAIEEWKELIYK                           | Label: 13C(6)15N(2)(K)@8; Label: 13C(6)15N(2)(K)@13                                      | missed K-E @8                 | 0.00610729  | 1702.896   | 568.6393 | 1702.89014 | 568.637329 | 3 | 15 | 17.909  | 2.36  |
| 57 | 27.77 | 29.91 | 42.0 MAPK9_FlexIII | 99.0 LSRPFQNGTHAK                            | Label: 13C(6)15N(4)(R)@3; Label: 13C(6)15N(2)(K)@12                                      |                               | 0.00057981  | 1443.77063 | 722.8926 | 1443.77014 | 722.892334 | 2 | 10 | 13.559  | 2.36  |
| 57 | 27.77 | 29.91 | 42.0 MAPK9_FlexIII | 99.0 MLVIDPKDR                               | Label: 13C(6)15N(2)(K)@8; Label: 13C(6)15N(4)(R)@9                                       | missed K-R @8                 | -0.00052441 | 1103.61231 | 552.8134 | 1103.61279 | 552.81366  | 2 | 10 | 16.0612 | 2.36  |
| 57 | 27.77 | 29.91 | 42.0 MAPK9_FlexIII | 99.0 MLVIDPKDR                               | Label: 13C(6)15N(2)(K)@8; Label: 13C(6)15N(4)(R)@9                                       | missed K-R @8                 | 0.00270419  | 1103.61548 | 368.8791 | 1103.61279 | 368.878204 | 3 | 9  | 16.0183 | 2.36  |
| 57 | 27.77 | 29.91 | 42.0 MAPK9_FlexIII | 99.0 TACTNFMMTPIYVVTR                        | Propionamide(C)@3; Label: 13C(6)15N(4)(R)@15                                             |                               | -2.78E-06   | 1814.83923 | 908.4269 | 1814.83936 | 908.426941 | 2 | 15 | 18.536  | 2.36  |
| 57 | 27.77 | 29.91 | 42.0 MAPK9_FlexIII | 99.0 YPTFLYK                                 | Label: 13C(6)15N(2)(K)@7                                                                 |                               | -0.00165037 | 938.497681 | 470.2561 | 938.499329 | 470.256928 | 2 | 9  | 18.0092 | 2.36  |
| 57 | 27.77 | 29.91 | 42.0 MAPK9_FlexIII | 99.0 YPTFLYK                                 | Label: 13C(6)15N(2)(K)@7                                                                 |                               | 0.00020099  | 938.499451 | 470.257  | 938.499329 | 470.256928 | 2 | 9  | 17.9008 | 2.36  |
| 57 | 27.77 | 29.91 | 42.0 MAPK9_FlexIII | 99.0 YPTFLYK                                 | Label: 13C(6)15N(2)(K)@7                                                                 |                               | -0.00091407 | 938.498474 | 470.2565 | 938.499329 | 470.256928 | 2 | 9  | 17.7612 | 2.36  |
| 60 | 26.43 | 28.47 | 59.7 FCRLA_FlexIII | 99.0 ADSGHYHCISGIFGSPGIPETASVVAITVQELFPAPILR | Propionamide(C)@8; Deamidated(Q)@13                                                      |                               | 0.00912846  | 4233.13086 | 1059.29  | 4233.12061 | 1059.28735 | 4 | 12 | 20.6389 | 41.77 |
| 60 | 26.43 | 28.47 | 59.7 FCRLA_FlexIII | 99.0 ATAIEPTFLYK                             |                                                                                          |                               | -0.00122967 | 1302.64844 | 652.3315 | 1302.64966 | 652.330292 | 2 | 13 | 18.15   | 41.77 |
| 60 | 26.43 | 28.47 | 59.7 FCRLA_FlexIII | 99.0 AVPSAEPOAGSPMTLSCQTK                    | Deamidated(Q)@8; Propionamide(C)@17                                                      |                               | -0.00368523 | 2073.96753 | 692.3298 | 2073.97119 | 692.330994 | 3 | 12 | 16.5004 | 41.77 |
| 60 | 26.43 | 28.47 | 59.7 FCRLA_FlexIII | 99.0 AYTFSEPFHLIVS/DW/LILQGPAKPVFEGDLLVLR    | Deamidated(Q)@20; Label: 13C(6)15N(2)(K)@24; Label: 13C(6)15N(4)(R)@35                   |                               | 0.0219234   | 4052.16821 | 1351.73  | 4052.14575 | 1351.72253 | 3 | 15 | 20.5447 | 41.77 |
| 60 | 26.43 | 28.47 | 59.7 FCRLA_FlexIII | 99.0 CQAWQDWPLTQVTFYR                        | Propionamide(C)@1                                                                        |                               | -0.0103511  | 2111.9773  | 1056.996 | 2111.98877 | 1057.00159 | 2 | 18 | 20.2502 | 41.77 |
| 60 | 26.43 | 28.47 | 59.7 FCRLA_FlexIII | 99.0 DGSALGPPGPNR                            |                                                                                          |                               | -0.00081742 | 1136.55664 | 569.2856 | 1136.5575  | 569.286011 | 2 | 13 | 14.9283 | 41.77 |
| 60 | 26.43 | 28.47 | 59.7 FCRLA_FlexIII | 99.0 DGSALGPPGPNREFSITVVQK                   | Label: 13C(6)15N(4)(R)@12; Label: 13C(6)15N(2)(K)@21                                     | missed R-E @12                | -0.00780964 | 2186.13745 | 729.7197 | 2186.14502 | 729.72229  | 3 | 12 | 17.6331 | 41.77 |
| 60 | 26.43 | 28.47 | 59.7 FCRLA_FlexIII | 99.0 EFSITVQK                                | Label: 13C(6)15N(2)(K)@9                                                                 |                               | 0.00029621  | 1057.59033 | 529.8024 | 1057.58997 | 529.802246 | 2 | 9  | 17.307  | 41.77 |
| 60 | 26.43 | 28.47 | 59.7 FCRLA_FlexIII | 99.0 GLSSEFQIPTASEDHSGSYWCEAATEDNQVWK        | Propionamide(C)@21; Label: 13C(6)15N(2)(K)@32                                            |                               | -4.16E-05   | 3650.60034 | 1217.874 | 3650.59863 | 1217.87354 | 3 | 20 | 18.7313 | 41.77 |
| 60 | 26.43 | 28.47 | 59.7 FCRLA_FlexIII | 99.0 LLFSFYK                                 | Label: 13C(6)15N(2)(K)@7                                                                 |                               | -0.00102921 | 924.519104 | 463.2668 | 924.52002  | 463.267304 | 2 | 7  | 25.3209 | 41.77 |
| 60 | 26.43 | 28.47 | 59.7 FCRLA_FlexIII | 99.0 LLFSFYKDR                               | Label: 13C(6)15N(2)(K)@7; Label: 13C(6)15N(4)(R)@10                                      | missed K-D @7                 | 0.00089617  | 1262.67883 | 421.9002 | 1262.67786 | 421.899872 | 3 | 9  | 18.5997 | 41.77 |
| 60 | 26.43 | 28.47 | 59.7 FCRLA_FlexIII | 99.0 QSPQLEIR                                | Gln->pyro-Glu @N-term; Label: 13C(6)15N(4)(R)@8                                          |                               | -6.33E-05   | 962.506104 | 482.2603 | 962.506043 | 482.260315 | 2 | 9  | 17.4613 | 41.77 |
| 60 | 26.43 | 28.47 | 59.7 FCRLA_FlexIII | 99.0 VQGASSAAPTLPNAPQK                       | Label: 13C(6)15N(2)(K)@19                                                                |                               | 0.00622793  | 1827.96326 | 914.9889 | 1827.95703 | 914.985779 | 2 | 18 | 15.623  | 41.77 |
| 60 | 26.43 | 28.47 | 59.7 FCRLA_FlexIII | 99.0 ADSGHYHCISGIFGSPGIPETASVVAITVQELFPAPILR | Propionamide(C)@8; Deamidated(Q)@13; Label: 13C(6)15N(4)(R)@40                           |                               | 0.0260109   | 4243.15479 | 708.1997 | 4243.12891 | 708.195374 | 6 | 14 | 20.5271 | 41.77 |
| 60 | 26.43 | 28.47 | 59.7 FCRLA_FlexIII | 99.0 ADSGHYHCISGIFGSPGIPETASVVAITVQELFPAPILR | Propionamide(C)@8; Deamidated(Q)@13; Label: 13C(6)15N(4)(R)@40                           |                               | 0.00085717  | 4243.13086 | 1061.79  | 4243.12891 | 1061.78943 | 4 | 14 | 20.7596 | 41.77 |
| 60 | 26.43 | 28.47 | 59.7 FCRLA_FlexIII | 99.0 ATAIEPTFLYK                             | Label: 13C(6)15N(2)(K)@11                                                                |                               | -0.00053799 | 1310.66333 | 656.3389 | 1310.66382 | 656.339172 | 2 | 12 | 18.0536 | 41.77 |
| 60 | 26.43 | 28.47 | 59.7 FCRLA_FlexIII | 99.0 ATAIEPTFLYK                             | Label: 13C(6)15N(2)(K)@11                                                                |                               | -0.00066006 | 1310.66333 | 656.3389 | 1310.66382 | 656.339172 | 2 | 12 | 18.3146 | 41.77 |
| 60 | 26.43 | 28.47 | 59.7 FCRLA_FlexIII | 99.0 ATAIEPTFLYK                             | Label: 13C(6)15N(2)(K)@11                                                                |                               | 0.001171    | 1310.66504 | 656.3398 | 1310.66382 | 656.339172 | 2 | 11 | 18.5733 | 41.77 |
| 60 | 26.43 | 28.47 | 59.7 FCRLA_FlexIII | 99.0 ATAIEPTFLYK                             | Label: 13C(6)15N(2)(K)@11                                                                |                               | 0.001171    | 1310.66504 | 656.3398 | 1310.66382 | 656.339172 | 2 | 10 | 20.9237 | 41.77 |
| 60 | 26.43 | 28.47 | 59.7 FCRLA_FlexIII | 99.0 ATAIEPTFLYK                             | Label: 13C(6)15N(2)(K)@11                                                                |                               | 0.00153721  | 1310.66553 | 656.34   | 1310.66382 | 656.339172 | 2 | 11 | 21.5422 | 41.77 |
| 60 | 26.43 | 28.47 | 59.7 FCRLA_FlexIII | 99.0 ATAIEPTFLYK                             | Label: 13C(6)15N(2)(K)@11                                                                |                               | -0.00029384 | 1310.6637  | 656.3391 | 1310.66382 | 656.339172 | 2 | 11 | 21.8008 | 41.77 |
| 60 | 26.43 | 28.47 | 59.7 FCRLA_FlexIII | 99.0 ATAIEPTFLYK                             | Label: 13C(6)15N(2)(K)@11                                                                |                               | 0.001171    | 1310.66504 | 656.3398 | 1310.66382 | 656.339172 | 2 | 10 | 22.0842 | 41.77 |
| 60 | 26.43 | 28.47 | 59.7 FCRLA_FlexIII | 99.0 ATAIEPTFLYK                             | Label: 13C(6)15N(2)(K)@11                                                                |                               | 0.00214756  | 1310.66602 | 656.3403 | 1310.66382 | 656.339172 | 2 | 9  | 22.3362 | 41.77 |
| 60 | 26.43 | 28.47 | 59.7 FCRLA_FlexIII | 99.0 ATAIEPTFLYK                             | Label: 13C(6)15N(2)(K)@11                                                                |                               | -5.98E-05   | 1310.66382 | 656.3392 | 1310.66382 | 656.339172 | 2 | 13 | 18.239  | 41.77 |
| 60 | 26.43 | 28.47 | 59.7 FCRLA_FlexIII | 99.0 ATAIEPTFLYK                             | Label: 13C(6)15N(2)(K)@11                                                                |                               | 0.001171    | 1310.66504 | 656.3398 | 1310.66382 | 656.339172 | 2 | 9  | 19.7705 | 41.77 |
| 60 | 26.43 | 28.47 | 59.7 FCRLA_FlexIII | 99.0 AVPSAEPOAGSPMTLSCQTK                    | Oxidation(M)@13; Propionamide(C)@17; Label: 13C(6)15N(2)(K)@20                           |                               | -0.0114585  | 2096.98535 | 1049.5   | 2096.99609 | 1049.50537 | 2 | 15 | 15.5077 | 41.77 |
| 60 | 26.43 | 28.47 | 59.7 FCRLA_FlexIII | 99.0 AVPSAEPOAGSPMTLSCQTK                    | Propionamide(C)@17; Label: 13C(6)15N(2)(K)@20                                            |                               | 0.00177057  | 2081.00342 | 1041.509 | 2081.00122 | 1041.50794 | 2 | 22 | 16.3136 | 41.77 |
| 60 | 26.43 | 28.47 | 59.7 FCRLA_FlexIII | 99.0 AVPSAEPOAGSPMTLSCQTK                    | Deamidated(Q)@8; Propionamide(C)@17; Label: 13C(6)15N(2)(K)@20                           |                               | 0.0220919   | 2082.00757 | 695.0098 | 2081.98535 | 695.00238  | 3 | 12 | 16.3191 | 41.77 |
| 60 | 26.43 | 28.47 | 59.7 FCRLA_FlexIII | 99.0 AVPSAEPOAGSPMTLSCQTK                    | Deamidated(Q)@8; Propionamide(C)@17                                                      |                               | 0.0136451   | 2073.98535 | 1038     | 2073.97119 | 1037.9928  | 2 | 12 | 16.5238 | 41.77 |
| 60 | 26.43 | 28.47 | 59.7 FCRLA_FlexIII | 99.0 AVPSAEPOAGSPMTLSCQTK                    | Propionamide(C)@17; Label: 13C(6)15N(2)(K)@20                                            |                               | -0.00091497 | 2080.99927 | 1041.507 | 2081.00122 | 1041.50794 | 2 | 22 | 16.573  | 41.77 |
| 60 | 26.43 | 28.47 | 59.7 FCRLA_FlexIII | 99.0 AVPSAEPOAGSPMTLSCQTK                    | Propionamide(C)@17; Label: 13C(6)15N(2)(K)@20                                            |                               | -0.00280341 | 2080.99878 | 694.6735 | 2081.00122 | 694.674377 | 3 | 14 | 16.5967 | 41.77 |
| 60 | 26.43 | 28.47 | 59.7 FCRLA_FlexIII | 99.0 AVPSAEPOAGSPMTLSCQTK                    | Propionamide(C)@17; Label: 13C(6)15N(2)(K)@20                                            |                               | 0.0160564   | 2081.01733 | 694.6797 | 2081.00122 | 694.674377 | 3 | 11 | 22.2913 | 41.77 |
| 60 | 26.43 | 28.47 | 59.7 FCRLA_FlexIII | 99.0 AVPSAEPOAGSPMTLSCQTK                    | Propionamide(C)@17; Label: 13C(6)15N(2)(K)@20                                            |                               | 0.00347956  | 2081.00537 | 1041.51  | 2081.00122 | 1041.50794 | 2 | 7  | 21.7523 | 41.77 |
| 60 | 26.43 | 28.47 | 59.7 FCRLA_FlexIII | 99.0 AYTFSEPFHLIVS/DW/LILQGPAKPVFEGDLLVLR    | Deamidated(Q)@20; Label: 13C(6)15N(2)(K)@24; Label: 13C(6)15N(4)(R)@35                   |                               | 0.0244024   | 4052.1709  | 1014.05  | 4052.14575 | 1014.04376 | 4 | 15 | 20.5211 | 41.77 |
| 60 | 26.43 | 28.47 | 59.7 FCRLA_FlexIII | 99.0 CQAWQDWPLTQVTFYR                        | Propionamide(C)@1; Deamidated(Q)@5; Label: 13C(6)15N(4)(R)@16                            |                               | 0.00627653  | 2122.98731 | 708.6697 | 2122.98096 | 708.667603 | 3 | 13 | 20.1773 | 41.77 |
| 60 | 26.43 | 28.47 | 59.7 FCRLA_FlexIII | 99.0 CQAWQDWPLTQVTFYR                        | Propionamide(C)@1; Label: 13C(6)15N(4)(R)@16                                             |                               | -0.00202087 | 2121.99536 | 1062.005 | 2121.99707 | 1062.00574 | 2 | 22 | 20.1962 | 41.77 |
| 60 | 26.43 | 28.47 | 59.7 FCRLA_FlexIII | 99.0 CQAWQDWPLTQVTFYR                        | Propionamide(C)@1; Label: 13C(6)15N(4)(R)@16                                             |                               | 0.00115661  | 2121.99829 | 708.34   | 2121.99707 | 708.3396   | 3 | 17 | 20.4365 | 41.77 |
| 60 | 26.43 | 28.47 | 59.7 FCRLA_FlexIII | 99.0 CQAWQDWPLTQVTFYR                        | Propionamide(C)@1; Label: 13C(6)15N(4)(R)@16                                             |                               | -0.00153259 | 2121.99536 | 1062.005 | 2121.99707 |            |   |    |         |       |

|    |       |       |                     |                                 |                                                                                   |                                 |             |            |          |            |            |   |    |         |       |
|----|-------|-------|---------------------|---------------------------------|-----------------------------------------------------------------------------------|---------------------------------|-------------|------------|----------|------------|------------|---|----|---------|-------|
| 60 | 26.43 | 28.47 | 59.7 FCRLA_FlexII   | 99.0 DGSALGPPGPNREFSITVVQK      | Label: 13C(6)15N(4)(R)@ 12; Label: 13C(6)15N(2)(K)@ 21                            | missed R-E @ 12                 | -0.00164875 | 2186.14331 | 1094.079 | 2186.14502 | 1094.07983 | 2 | 17 | 17.9019 | 41.77 |
| 60 | 26.43 | 28.47 | 59.7 FCRLA_FlexII   | 99.0 LLFSFYK                    | Label: 13C(6)15N(2)(K)@ 7                                                         |                                 | -0.00041886 | 924.519653 | 463.2671 | 924.52002  | 463.267304 | 2 | 7  | 25.5755 | 41.77 |
| 60 | 26.43 | 28.47 | 59.7 FCRLA_FlexII   | 99.0 LLFSFYK                    | Label: 13C(6)15N(2)(K)@ 7                                                         |                                 | -0.00102921 | 924.519104 | 463.2668 | 924.52002  | 463.267304 | 2 | 7  | 24.8158 | 41.77 |
| 60 | 26.43 | 28.47 | 59.7 FCRLA_FlexII   | 99.0 LLFSFYK                    | Label: 13C(6)15N(2)(K)@ 7                                                         |                                 | 0.00495223  | 924.525085 | 463.2698 | 924.52002  | 463.267304 | 2 | 7  | 26.3411 | 41.77 |
| 60 | 26.43 | 28.47 | 59.7 FCRLA_FlexII   | 99.0 LLFSFYK                    | Label: 13C(6)15N(2)(K)@ 7                                                         |                                 | -0.00102921 | 924.519104 | 463.2668 | 924.52002  | 463.267304 | 2 | 7  | 25.0668 | 41.77 |
| 60 | 26.43 | 28.47 | 59.7 FCRLA_FlexII   | 99.0 LLFSFYK                    | Label: 13C(6)15N(2)(K)@ 7                                                         |                                 | 0.00495223  | 924.525085 | 463.2698 | 924.52002  | 463.267304 | 2 | 7  | 23.8161 | 41.77 |
| 60 | 26.43 | 28.47 | 59.7 FCRLA_FlexII   | 99.0 LLFSFYK                    | Label: 13C(6)15N(2)(K)@ 7                                                         |                                 | 0.00495223  | 924.525085 | 463.2698 | 924.52002  | 463.267304 | 2 | 7  | 23.2554 | 41.77 |
| 60 | 26.43 | 28.47 | 59.7 FCRLA_FlexII   | 99.0 LLFSFYKDKR                 | Label: 13C(6)15N(2)(K)@ 7; Label: 13C(6)15N(4)(R)@ 10                             | missed K-D @ 7                  | 0.00705707  | 1262.68481 | 632.3497 | 1262.67786 | 632.346191 | 2 | 11 | 18.3689 | 41.77 |
| 60 | 26.43 | 28.47 | 59.7 FCRLA_FlexII   | 99.0 LLFSFYKDKR                 | Label: 13C(6)15N(2)(K)@ 7; Label: 13C(6)15N(4)(R)@ 10                             | missed K-D @ 7                  | -0.00029402 | 1262.67761 | 421.8998 | 1262.67786 | 421.899872 | 3 | 9  | 18.3197 | 41.77 |
| 60 | 26.43 | 28.47 | 59.7 FCRLA_FlexII   | 99.0 QSPQLEIR                   | Label: 13C(6)15N(4)(R)@ 8                                                         |                                 | 0.00036101  | 979.533081 | 490.7738 | 979.532593 | 490.77359  | 2 | 10 | 15.8708 | 41.77 |
| 60 | 26.43 | 28.47 | 59.7 FCRLA_FlexII   | 99.0 QSPQLEIR                   | Label: 13C(6)15N(4)(R)@ 8                                                         |                                 | -0.00018831 | 979.532471 | 490.7735 | 979.532593 | 490.77359  | 2 | 9  | 16.1289 | 41.77 |
| 60 | 26.43 | 28.47 | 59.7 FCRLA_FlexII   | 99.0 QSPQLEIR                   | Gln->pyro-Glu@ N-term; Label: 13C(6)15N(4)(R)@ 8                                  |                                 | 0.00011979  | 962.506287 | 482.2604 | 962.506043 | 482.260315 | 2 | 10 | 17.1811 | 41.77 |
| 60 | 26.43 | 28.47 | 59.7 FCRLA_FlexII   | 99.0 QSPQLEIR                   | Label: 13C(6)15N(4)(R)@ 8                                                         |                                 | -0.00763459 | 979.525085 | 490.7698 | 979.532593 | 490.77359  | 2 | 8  | 26.5114 | 41.77 |
| 60 | 26.43 | 28.47 | 59.7 FCRLA_FlexII   | 99.0 VQGASSSAAPPTLNPAPOK        | Label: 13C(6)15N(2)(K)@ 19                                                        |                                 | 0.00775095  | 1827.96484 | 914.9897 | 1827.95703 | 914.985779 | 2 | 21 | 15.3438 | 41.77 |
| 60 | 26.43 | 28.47 | 59.7 FCRLA_FlexII   | 99.0 VQGASSSAAPPTLNPAPOK        | Label: 13C(6)15N(2)(K)@ 19                                                        |                                 | 0.00055245  | 1827.95764 | 610.3265 | 1827.95703 | 610.326294 | 3 | 16 | 15.3664 | 41.77 |
| 60 | 26.43 | 28.47 | 59.7 FCRLA_FlexII   | 99.0 VQGASSSAAPPTLNPAPOK        | Label: 13C(6)15N(2)(K)@ 19                                                        |                                 | 0.00193231  | 1819.94482 | 910.9797 | 1819.94287 | 910.978699 | 2 | 21 | 15.5033 | 41.77 |
| 60 | 26.43 | 28.47 | 59.7 FCRLA_FlexII   | 99.0 VQGASSSAAPPTLNPAPOK        | Label: 13C(6)15N(2)(K)@ 19                                                        |                                 | -0.00103811 | 1827.95606 | 914.9853 | 1827.95703 | 914.985779 | 2 | 20 | 15.611  | 41.77 |
| 60 | 26.43 | 28.47 | 59.7 FCRLA_FlexII   | 99.0 VQGASSSAAPPTLNPAPOK        | Label: 13C(6)15N(2)(K)@ 19                                                        |                                 | -0.0012786  | 1827.95593 | 610.3259 | 1827.95703 | 610.326294 | 3 | 16 | 15.6345 | 41.77 |
| 60 | 26.43 | 28.47 | 59.7 FCRLA_FlexII   | 99.0 VQGASSSAAPPTLNPAPOK        | Label: 13C(6)15N(2)(K)@ 19                                                        |                                 | -0.00421194 | 1827.95288 | 914.9837 | 1827.95703 | 914.985779 | 2 | 18 | 15.8794 | 41.77 |
| 60 | 26.43 | 28.47 | 59.7 FCRLA_FlexII   | 99.0 YPTFLYK                    | Label: 13C(6)15N(2)(K)@ 7                                                         | cleaved E-Y@ N-term             | -0.00165037 | 938.497681 | 470.2561 | 938.499329 | 470.256928 | 2 | 9  | 18.0092 | 41.77 |
| 60 | 26.43 | 28.47 | 59.7 FCRLA_FlexII   | 99.0 YPTFLYK                    | Label: 13C(6)15N(2)(K)@ 7                                                         | cleaved E-Y@ N-term             | 0.00020099  | 938.499451 | 470.257  | 938.499329 | 470.256928 | 2 | 9  | 17.9008 | 41.77 |
| 60 | 26.43 | 28.47 | 59.7 FCRLA_FlexII   | 99.0 YPTFLYK                    | Label: 13C(6)15N(2)(K)@ 7                                                         | cleaved E-Y@ N-term             | -0.00091407 | 938.498474 | 470.2565 | 938.499329 | 470.256928 | 2 | 9  | 17.7612 | 41.77 |
| 61 | 26.19 | 28.33 | 39.3 CEACAM1_FlexII | 99.0 EDAGTYWCEVFNPISK           | Propionamide(C) @ 8; Label: 13C(6)15N(2)(K)@ 16                                   |                                 | -0.00436003 | 1936.87122 | 969.4429 | 1936.87561 | 969.445129 | 2 | 20 | 15.9789 | 25.32 |
| 61 | 26.19 | 28.33 | 39.3 CEACAM1_FlexII | 99.0 ETIYPNASLIQNVQNDTGFYTLQVIK | Label: 13C(6)15N(2)(K)@ 28                                                        |                                 | -0.00096735 | 3190.66431 | 1064.562 | 3190.66406 | 1064.56201 | 3 | 26 | 20.4736 | 25.32 |
| 61 | 26.19 | 28.33 | 39.3 CEACAM1_FlexII | 99.0 EVLLLVHNLPOQLFGYSWYKGER    | Deamidated(Q) @ 11; Label: 13C(6)15N(2)(K)@ 20; Label: 13C(6)15N(4)(R)@ 23        | missed K-G @ 20                 | 0.025073    | 2807.50147 | 936.8411 | 2807.47656 | 936.832825 | 3 | 16 | 20.0559 | 25.32 |
| 61 | 26.19 | 28.33 | 39.3 CEACAM1_FlexII | 99.0 LSQGNLTLSINPVK             | Label: 13C(6)15N(2)(K)@ 14                                                        |                                 | 0.00889243  | 1478.82727 | 740.4209 | 1478.81836 | 740.416504 | 2 | 19 | 16.7114 | 25.32 |
| 61 | 26.19 | 28.33 | 39.3 CEACAM1_FlexII | 99.0 LSQGNLTLSINPVKR            | Label: 13C(6)15N(2)(K)@ 14; Label: 13C(6)15N(4)(R)@ 15                            | missed K-R @ 14                 | -0.00035768 | 1644.92749 | 823.471  | 1644.92773 | 823.471191 | 2 | 16 | 15.9785 | 25.32 |
| 61 | 26.19 | 28.33 | 39.3 CEACAM1_FlexII | 99.0 MKLSQGNLTLSINPVKR          | Label: 13C(6)15N(2)(K)@ 2; Label: 13C(6)15N(2)(K)@ 16; Label: 13C(6)15N(4)(R)@ 17 | missed K-L @ 2; missed K-R @ 16 | 0.0132676   | 1912.09058 | 638.3708 | 1912.07739 | 638.366394 | 3 | 21 | 16.1528 | 25.32 |
| 61 | 26.19 | 28.33 | 39.3 CEACAM1_FlexII | 99.0 NDTGPYCEIQNPVSANR          | Deamidated(N) @ 1; Propionamide(C)@ 8                                             |                                 | 0.00671385  | 2077.90747 | 1039.961 | 2077.90112 | 1039.95789 | 2 | 15 | 16.6012 | 25.32 |
| 61 | 26.19 | 28.33 | 39.3 CEACAM1_FlexII | 99.0 QIVGYAIGTQOATPGPANSGR      | Gln->pyro-Glu@ N-term; Label: 13C(6)15N(4)(R)@ 21                                 |                                 | -0.0141069  | 2078.02734 | 1040.021 | 2078.04199 | 1040.02832 | 2 | 22 | 18.2699 | 25.32 |
| 61 | 26.19 | 28.33 | 39.3 CEACAM1_FlexII | 99.0 REDAGTYWCEVFNPISK          | Label: 13C(6)15N(4)(R)@ 1; Propionamide(C)@ 9; Label: 13C(6)15N(2)(K)@ 17         | missed R-E @ 1                  | -0.00415078 | 2102.98096 | 702.0009 | 2102.98511 | 702.002319 | 3 | 18 | 18.9154 | 25.32 |
| 61 | 26.19 | 28.33 | 39.3 CEACAM1_FlexII | 99.0 TIIVTLESPVAKPQIK           | Label: 13C(6)15N(2)(K)@ 13; Label: 13C(6)15N(2)(K)@ 17                            |                                 | -0.010962   | 1851.13049 | 618.0508 | 1851.1416  | 618.054443 | 3 | 15 | 17.9759 | 25.32 |
| 61 | 26.19 | 28.33 | 39.3 CEACAM1_FlexII | 99.0 TLTLTSVTR                  | Label: 13C(6)15N(4)(R)@ 9                                                         |                                 | -0.00072359 | 1012.61487 | 507.3147 | 1012.6156  | 507.315094 | 2 | 11 | 18.4751 | 25.32 |
| 61 | 26.19 | 28.33 | 39.3 CEACAM1_FlexII | 99.0 TTVTGDKDDSVNLCTSTNDTGISIR  | Label: 13C(6)15N(2)(K)@ 7; Propionamide(C)@ 14; Label: 13C(6)15N(4)(R)@ 24        | missed K-D @ 7                  | -0.00605226 | 2586.25    | 863.0906 | 2586.2561  | 863.092651 | 3 | 25 | 16.9106 | 25.32 |
| 61 | 26.19 | 28.33 | 39.3 CEACAM1_FlexII | 99.0 EDAGTYWCEVFNPISK           | Propionamide(C) @ 8; Label: 13C(6)15N(2)(K)@ 16                                   |                                 | -0.00094206 | 1936.87463 | 969.4446 | 1936.87561 | 969.445129 | 2 | 18 | 19.8499 | 25.32 |
| 61 | 26.19 | 28.33 | 39.3 CEACAM1_FlexII | 99.0 EDAGTYWCEVFNPISK           | Propionamide(C) @ 8; Label: 13C(6)15N(2)(K)@ 16                                   |                                 | -0.00491046 | 1936.87097 | 646.6309 | 1936.87561 | 646.632507 | 3 | 13 | 19.6879 | 25.32 |
| 61 | 26.19 | 28.33 | 39.3 CEACAM1_FlexII | 99.0 EDAGTYWCEVFNPISK           | Propionamide(C) @ 8; Label: 13C(6)15N(2)(K)@ 16                                   |                                 | -0.00790007 | 1936.86792 | 969.4412 | 1936.87561 | 969.445129 | 2 | 13 | 20.1252 | 25.32 |
| 61 | 26.19 | 28.33 | 39.3 CEACAM1_FlexII | 99.0 ETIYPNASLIQNVQNDTGFYTLQVIK | Deamidated(Q) @ 12; Label: 13C(6)15N(2)(K)@ 28                                    |                                 | 0.00378752  | 3191.65112 | 1064.891 | 3191.64819 | 1064.89002 | 3 | 21 | 20.7746 | 25.32 |
| 61 | 26.19 | 28.33 | 39.3 CEACAM1_FlexII | 99.0 ETIYPNASLIQNVQNDTGFYTLQVIK | Label: 13C(6)15N(2)(K)@ 28                                                        |                                 | -0.00424385 | 3190.66138 | 1064.561 | 3190.66406 | 1064.56201 | 3 | 22 | 20.3974 | 25.32 |
| 61 | 26.19 | 28.33 | 39.3 CEACAM1_FlexII | 99.0 LSQGNLTLSINPVK             | Deamidated(N) @ 5; Label: 13C(6)15N(2)(K)@ 14                                     |                                 | 0.00485823  | 1479.80725 | 740.9109 | 1479.80237 | 740.908508 | 2 | 14 | 16.9817 | 25.32 |
| 61 | 26.19 | 28.33 | 39.3 CEACAM1_FlexII | 99.0 LSQGNLTLSINPVKR            | Label: 13C(6)15N(2)(K)@ 14; Label: 13C(6)15N(4)(R)@ 15                            | missed K-R @ 14                 | 0.0013502   | 1644.9292  | 549.317  | 1644.92773 | 549.316528 | 3 | 15 | 15.976  | 25.32 |
| 61 | 26.19 | 28.33 | 39.3 CEACAM1_FlexII | 99.0 LSQGNLTLSINPVKR            | Label: 13C(6)15N(2)(K)@ 14; Label: 13C(6)15N(4)(R)@ 15                            | missed K-R @ 14                 | -0.00743887 | 1644.92041 | 549.3141 | 1644.92773 | 549.316528 | 3 | 12 | 16.1555 | 25.32 |
| 61 | 26.19 | 28.33 | 39.3 CEACAM1_FlexII | 99.0 LSQGNLTLSINPVKR            | Label: 13C(6)15N(2)(K)@ 14; Label: 13C(6)15N(4)(R)@ 15                            | missed K-R @ 14                 | 0.00562156  | 1644.93335 | 412.2406 | 1644.92773 | 412.239227 | 4 | 11 | 15.0669 | 25.32 |
| 61 | 26.19 | 28.33 | 39.3 CEACAM1_FlexII | 99.0 LSQGNLTLSINPVKR            | Label: 13C(6)15N(2)(K)@ 14; Label: 13C(6)15N(4)(R)@ 15                            | missed K-R @ 14                 | 0.0127028   | 1644.94055 | 549.3208 | 1644.92773 | 549.316528 | 3 | 11 | 16.6342 | 25.32 |
| 61 | 26.19 | 28.33 | 39.3 CEACAM1_FlexII | 99.0 LSQGNLTLSINPVKR            | Deamidated(N) @ 5; Label: 13C(6)15N(2)(K)@ 14; Label: 13C(6)15N(4)(R)@ 15         | missed K-R @ 14                 | 0.0187394   | 1645.93066 | 549.6508 | 1645.91174 | 549.644531 | 3 | 11 | 15.0253 | 25.32 |
| 61 | 26.19 | 28.33 | 39.3 CEACAM1_FlexII | 99.0 MKLSQGNLTLSINPVKR          | Label: 13C(6)15N(2)(K)@ 2; Label: 13C(6)15N(2)(K)@ 16; Label: 13C(6)15N(4)(R)@ 17 | missed K-L @ 2; missed K-R @ 16 | -0.00095472 | 1912.07654 | 479.0264 | 1912.07739 | 479.028642 | 4 | 14 | 16.187  | 25.32 |
| 61 | 26.19 | 28.33 | 39.3 CEACAM1_FlexII | 99.0 NDTGPYCEIQNPVSANR          | Propionamide(C) @ 8; Label: 13C(6)15N(4)(R)@ 18                                   |                                 | 0.00248846  | 2086.92725 | 1044.471 | 2086.92529 | 1044.46997 | 2 | 22 | 16.4839 | 25.32 |
| 61 | 26.19 | 28.33 | 39.3 CEACAM1_FlexII | 99.0 NDTGPYCEIQNPVSANR          | Propionamide(C) @ 8; Label: 13C(6)15N(4)(R)@ 18                                   |                                 | 0.00560014  | 2086.93091 | 696.6509 | 2086.92529 | 696.649048 | 3 | 15 | 16.5262 | 25.32 |
| 61 | 26.19 | 28.33 | 39.3 CEACAM1_FlexII | 99.0 NDTGPYCEIQNPVSANR          | Propionamide(C) @ 8; Label: 13C(6)15N(4)(R)@ 18                                   |                                 | -0.00190608 | 2086.92334 | 1044.469 | 2086.92529 | 1044.46997 | 2 | 23 | 16.752  | 25.32 |
| 61 | 26.19 | 28.33 | 39.3 CEACAM1_FlexII | 99.0 NDTGPYCEIQNPVSANR          | Propionamide(C) @ 8; Label: 13C(6)15N(4)(R)@ 18                                   |                                 | 0.00248846  | 2086.92725 | 1044.471 | 2086.92529 | 1044.46997 | 2 | 13 | 21.7319 | 25.32 |
| 61 | 26.19 | 28.33 | 39.3 CEACAM1_FlexII | 99.0 NDTGPYCEIQNPVSANR          | Deamidated(N) @ 1; Propionamide(C) @ 8; Label: 13C(6)15N(4)(R)@ 18                |                                 | 0.0184738   | 2087.92725 | 1044.971 | 2087.90942 | 1044.96191 | 2 | 13 | 21.6381 | 25.32 |
| 61 | 26.19 | 28.33 | 39.3 CEACAM1_FlexII | 99.0 NDTGPYCEIQNPVSANR          | Deamidated(N) @ 1; Propionamide(C) @ 8; Label: 13C(6)15N(4)(R)@ 18                |                                 | 0.0384934   | 2087.94727 | 1044.981 | 2087.90942 | 1044.96191 | 2 | 11 | 22.3275 | 25.32 |
| 61 | 26.19 | 28.33 | 39.3 CEACAM1_FlexII | 99.0 QIVGYAIGTQOATPGPANSGR      | Label: 13C(6)15N(4)(R)@ 21                                                        |                                 | 0.00214437  | 2095.0708  | 699.3642 | 2095.0686  | 699.363464 | 3 | 18 | 18.8063 | 25.32 |
| 61 | 26.19 | 28.33 | 39.3 CEACAM1_FlexII | 99.0 QIVGYAIGTQOATPGPANSGR      | Label: 13C(6)15N(4)(R)@ 21                                                        |                                 | -0.00060111 | 2095.06738 | 1048.541 | 2095.0686  | 1048.54163 | 2 | 25 | 16.8119 | 25.32 |
| 61 | 26.19 | 28.33 | 39.3 CEACAM1_FlexII | 99.0 QIVGYAIGTQOATPGPANSGR      | Label: 13C(6)15N(4)(R)@ 21                                                        |                                 | -0.0089019  | 2095.05933 | 1048.537 | 2095.0686  | 1048.54163 | 2 | 23 | 17.0809 | 25.32 |
| 61 | 26.19 | 28.33 | 39.3 CEACAM1_FlexII | 99.0 QIVGYAIGTQOATPGPANSGR      | Gln->pyro-Glu@ N-term; Label: 13C(6)15N(4)(R)@ 21                                 |                                 | 0.00591266  | 2078.04736 | 1040.031 | 2078.04199 | 1040.02832 | 2 | 17 | 17.6405 | 25.32 |
| 61 | 26.19 | 28.33 | 39.3 CEACAM1_FlexII | 99.0 QIVGYAIGTQOATPGPANSGR      | Gln->pyro-Glu@ N-term; Label: 13C(6)15N(4)(R)@ 21                                 |                                 | 0.00591266  | 2078.04736 | 1040.031 | 2078.04199 | 1040.02832 | 2 | 23 | 17.8982 | 25.32 |
| 61 | 26.19 | 28.3  |                     |                                 |                                                                                   |                                 |             |            |          |            |            |   |    |         |       |

|    |       |       |                       |                                |                                                                                         |                                  |             |            |          |            |            |   |    |         |       |
|----|-------|-------|-----------------------|--------------------------------|-----------------------------------------------------------------------------------------|----------------------------------|-------------|------------|----------|------------|------------|---|----|---------|-------|
| 61 | 26.19 | 28.33 | 39.3 CEACAM1_FlexIII  | 99.0 TIIVTELSPV/VAKPQIK        | Label:13C(6)15N(2)(K)@13; Label:13C(6)15N(2)(K)@17                                      |                                  | -0.010962   | 1851.13049 | 618.0508 | 1851.1416  | 618.054443 | 3 | 11 | 20.9686 | 25.32 |
| 61 | 26.19 | 28.33 | 39.3 CEACAM1_FlexIII  | 99.0 TLTLTSVTR                 | Label:13C(6)15N(4)(R)@9                                                                 |                                  | -0.0087192  | 1012.60687 | 507.3107 | 1012.6156  | 507.315094 | 2 | 10 | 18.7555 | 25.32 |
| 61 | 26.19 | 28.33 | 39.3 CEACAM1_FlexIII  | 99.0 TLTLTSVTR                 | Label:13C(6)15N(4)(R)@9                                                                 |                                  | 0.00110746  | 1012.6167  | 507.3156 | 1012.6156  | 507.315094 | 2 | 10 | 26.5037 | 25.32 |
| 61 | 26.19 | 28.33 | 39.3 CEACAM1_FlexIII  | 99.0 TTVTGDOKDSVNLCTSTNDTGISIR | Label:13C(6)15N(2)(K)@7; Propionamide(C)@14; Label:13C(6)15N(4)(R)@24                   | missed K-D@7                     | -0.00477052 | 2586.25147 | 863.0911 | 2586.2561  | 863.092651 | 3 | 20 | 16.3121 | 25.32 |
| 61 | 26.19 | 28.33 | 39.3 CEACAM1_FlexIII  | 99.0 TTVTGDOKDSVNLCTSTNDTGISIR | Label:13C(6)15N(2)(K)@7; Deamidated(N)@11; Propionamide(C)@14; Label:13C(6)15N(4)(R)@24 | missed K-D@7                     | 0.0311123   | 2587.27124 | 863.431  | 2587.24023 | 863.420654 | 3 | 19 | 16.6528 | 25.32 |
| 61 | 26.19 | 28.33 | 39.3 CEACAM1_FlexIII  | 99.0 TTVTGDOKDSVNLCTSTNDTGISIR | Label:13C(6)15N(2)(K)@7; Deamidated(N)@11; Propionamide(C)@14; Label:13C(6)15N(4)(R)@24 | missed K-D@7                     | 0.00816418  | 2587.24731 | 1294.631 | 2587.24023 | 1294.62732 | 2 | 21 | 16.6901 | 25.32 |
| 61 | 26.19 | 28.33 | 39.3 CEACAM1_FlexIII  | 99.0 TTVTGDOKDSVNLCTSTNDTGISIR | Label:13C(6)15N(2)(K)@7; Propionamide(C)@14; Deamidated(N)@17; Label:13C(6)15N(4)(R)@24 | missed K-D@7                     | 0.00816418  | 2587.24731 | 1294.631 | 2587.24023 | 1294.62732 | 2 | 25 | 16.9599 | 25.32 |
| 61 | 26.19 | 28.33 | 39.3 CEACAM1_FlexIII  | 99.0 TTVTGDOKDSVNLCTSTNDTGISIR | Label:13C(6)15N(2)(K)@7; Deamidated(N)@11; Propionamide(C)@14; Label:13C(6)15N(4)(R)@24 | missed K-D@7                     | 0.0311123   | 2587.27124 | 863.431  | 2587.24023 | 863.420654 | 3 | 13 | 26.6298 | 25.32 |
| 61 | 26.19 | 28.33 | 39.3 CEACAM1_FlexIII  | 99.0 TTVTGDOKDSVNLCTSTNDTGISIR | Label:13C(6)15N(2)(K)@7; Deamidated(N)@11; Propionamide(C)@14; Label:13C(6)15N(4)(R)@24 | missed K-D@7                     | 0.0311123   | 2587.27124 | 863.431  | 2587.24023 | 863.420654 | 3 | 10 | 21.7134 | 25.32 |
| 61 | 26.19 | 28.33 | 39.3 CEACAM1_FlexIII  | 99.0 YPTFLYK                   | Label:13C(6)15N(2)(K)@7                                                                 |                                  | -0.00165037 | 938.497681 | 470.2561 | 938.499329 | 470.256928 | 2 | 9  | 18.0092 | 25.32 |
| 61 | 26.19 | 28.33 | 39.3 CEACAM1_FlexIII  | 99.0 YPTFLYK                   | Label:13C(6)15N(2)(K)@7                                                                 |                                  | 0.00020099  | 938.499451 | 470.257  | 938.499329 | 470.256928 | 2 | 9  | 17.9008 | 25.32 |
| 61 | 26.19 | 28.33 | 39.3 CEACAM1_FlexIII  | 99.0 YPTFLYK                   | Label:13C(6)15N(2)(K)@7                                                                 |                                  | -0.00091407 | 938.498474 | 470.2565 | 938.499329 | 470.256928 | 2 | 9  | 17.7612 | 25.32 |
| 62 | 26.07 | 28.07 | 17.4 CWF19L1_FlexIII  | 99.0 CGSALVSSLATGLKPR          | Propionamide(C)@1; Label:13C(6)15N(2)(K)@14; Label:13C(6)15N(4)(R)@16                   |                                  | -0.00010986 | 1647.90967 | 550.3105 | 1647.90967 | 550.310486 | 3 | 17 | 17.9272 | 0.57  |
| 62 | 26.07 | 28.07 | 17.4 CWF19L1_FlexIII  | 99.0 CVGNFGNSSSGEVDTK          | Propionamide(C)@1; Label:13C(6)15N(2)(K)@15                                             |                                  | 0.00569872  | 1591.7085  | 796.8615 | 1591.70276 | 796.858643 | 2 | 17 | 15.4655 | 0.57  |
| 62 | 26.07 | 28.07 | 17.4 CWF19L1_FlexIII  | 99.0 EVLASEAILNVPDK            | Label:13C(6)15N(2)(K)@14                                                                |                                  | 0.00528184  | 1504.82813 | 753.4213 | 1504.82288 | 753.418701 | 2 | 14 | 18.2133 | 0.57  |
| 62 | 26.07 | 28.07 | 17.4 CWF19L1_FlexIII  | 99.0 FIALANVGNPEK              | Label:13C(6)15N(2)(K)@12                                                                |                                  | 0.00055204  | 1279.70203 | 640.8583 | 1279.70154 | 640.858093 | 2 | 14 | 17.7034 | 0.57  |
| 62 | 26.07 | 28.07 | 17.4 CWF19L1_FlexIII  | 99.0 GVDILLTSPWPK              | Label:13C(6)15N(2)(K)@12                                                                |                                  | 0.00034827  | 1332.75366 | 667.3841 | 1332.7533  | 667.383911 | 2 | 11 | 19.6737 | 0.57  |
| 62 | 26.07 | 28.07 | 17.4 CWF19L1_FlexIII  | 99.0 HLVVNIQTHCYLALAK          | Propionamide(C)@10; Label:13C(6)15N(2)(K)@16                                            |                                  | 0.00384416  | 1830.01025 | 611.0107 | 1830.00659 | 611.00946  | 3 | 11 | 17.7614 | 0.57  |
| 62 | 26.07 | 28.07 | 17.4 CWF19L1_FlexIII  | 99.0 KVPIQTIVYLGANNQETVK       | Label:13C(6)15N(2)(K)@1; Label:13C(6)15N(2)(K)@18                                       | missed K-V@1                     | 0.00440195  | 2017.12207 | 673.3813 | 2017.11792 | 673.379883 | 3 | 16 | 17.053  | 0.57  |
| 62 | 26.07 | 28.07 | 17.4 CWF19L1_FlexIII  | 99.0 LMDAAELVK                 | Label:13C(6)15N(2)(K)@9                                                                 |                                  | -0.00036227 | 996.5401   | 499.2773 | 996.540527 | 499.277527 | 2 | 11 | 17.4336 | 0.57  |
| 62 | 26.07 | 28.07 | 17.4 CWF19L1_FlexIII  | 99.0 MMLCTTSQFK                | Propionamide(C)@4; Label:13C(6)15N(2)(K)@10                                             |                                  | -0.0090306  | 1267.58472 | 634.7996 | 1267.58545 | 634.799988 | 2 | 11 | 17.1223 | 0.57  |
| 62 | 26.07 | 28.07 | 17.4 CWF19L1_FlexIII  | 99.0 NHILQENAQHATR             | Label:13C(6)15N(4)(R)@14                                                                |                                  | -0.00701106 | 1653.85059 | 414.4699 | 1653.85742 | 414.471649 | 4 | 12 | 14.385  | 0.57  |
| 62 | 26.07 | 28.07 | 17.4 CWF19L1_FlexIII  | 99.0 YFQDADGCELAENITYLGR       | Deamidated(Q)@3; Propionamide(C)@8; Label:13C(6)15N(4)(R)@19                            |                                  | 0.028486    | 2259.03125 | 1130.523 | 2259.00293 | 1130.50879 | 2 | 17 | 19.0657 | 0.57  |
| 62 | 26.07 | 28.07 | 17.4 CWF19L1_FlexIII  | 99.0 YHFAALEK                  | Label:13C(6)15N(2)(K)@8                                                                 |                                  | -0.00357571 | 985.507568 | 329.5098 | 985.511292 | 329.511017 | 3 | 10 | 16.2068 | 0.57  |
| 62 | 26.07 | 28.07 | 17.4 CWF19L1_FlexIII  | 99.0 YLYAFSIVPMK               | Label:13C(6)15N(2)(K)@11                                                                |                                  | -0.00254999 | 1338.7113  | 670.3629 | 1338.71375 | 670.364136 | 2 | 11 | 19.8568 | 0.57  |
| 62 | 26.07 | 28.07 | 17.4 CWF19L1_FlexIII  | 99.0 NHILQENAQHATR             | Label:13C(6)15N(4)(R)@14                                                                |                                  | 0.0113148   | 1653.8689  | 827.9417 | 1653.85742 | 827.936035 | 2 | 18 | 14.3691 | 0.57  |
| 62 | 26.07 | 28.07 | 17.4 CWF19L1_FlexIII  | 99.0 NHILQENAQHATR             | Deamidated(N)@8; Label:13C(6)15N(4)(R)@14                                               |                                  | -0.0319085  | 1654.80957 | 552.6105 | 1654.84143 | 552.621094 | 3 | 10 | 14.7001 | 0.57  |
| 62 | 26.07 | 28.07 | 17.4 CWF19L1_FlexIII  | 99.0 YHFAALEK                  | Label:13C(6)15N(2)(K)@8                                                                 |                                  | -0.00155394 | 985.509644 | 493.7621 | 985.511292 | 493.762909 | 2 | 12 | 16.2257 | 0.57  |
| 62 | 26.07 | 28.07 | 17.4 CWF19L1_FlexIII  | 99.0 YPTFLYK                   | Label:13C(6)15N(2)(K)@7                                                                 | cleaved D-Y@N-term               | -0.00165037 | 938.497681 | 470.2561 | 938.499329 | 470.256928 | 2 | 9  | 18.0092 | 0.57  |
| 62 | 26.07 | 28.07 | 17.4 CWF19L1_FlexIII  | 99.0 YPTFLYK                   | Label:13C(6)15N(2)(K)@7                                                                 | cleaved D-Y@N-term               | 0.00020099  | 938.499451 | 470.257  | 938.499329 | 470.256928 | 2 | 9  | 17.9008 | 0.57  |
| 62 | 26.07 | 28.07 | 17.4 CWF19L1_FlexIII  | 99.0 YPTFLYK                   | Label:13C(6)15N(2)(K)@7                                                                 | cleaved D-Y@N-term               | -0.00091407 | 938.498474 | 470.2565 | 938.499329 | 470.256928 | 2 | 9  | 17.7612 | 0.57  |
| 65 | 25.39 | 29.86 | 33.5 BAIAP2L2_FlexIII | 99.0 AHSPPGLGPALGPPYPSSGR      | Label:13C(6)15N(4)(R)@19                                                                |                                  | 0.00820928  | 1852.99048 | 618.6708 | 1852.9823  | 618.66803  | 3 | 17 | 17.6204 | 0.51  |
| 65 | 25.39 | 29.86 | 33.5 BAIAP2L2_FlexIII | 99.0 ALQSPTSOILGEILVQMSDQOR    | Deamidated(Q)@16; Label:13C(6)15N(4)(R)@22                                              |                                  | 0.0318235   | 2425.27173 | 809.4312 | 2425.23975 | 809.420532 | 3 | 15 | 20.4776 | 0.51  |
| 65 | 25.39 | 29.86 | 33.5 BAIAP2L2_FlexIII | 99.0 ALVSHSEGANHLLR            | Label:13C(6)15N(4)(R)@15                                                                |                                  | -0.0035723  | 1613.8479  | 807.9312 | 1613.85132 | 807.932922 | 2 | 16 | 15.0402 | 0.51  |
| 65 | 25.39 | 29.86 | 33.5 BAIAP2L2_FlexIII | 99.0 APSAPPPLPSSR              | Label:13C(6)15N(4)(R)@13                                                                |                                  | -0.00380175 | 1282.68713 | 642.3508 | 1282.69092 | 642.357272 | 2 | 13 | 15.9073 | 0.51  |
| 65 | 25.39 | 29.86 | 33.5 BAIAP2L2_FlexIII | 99.0 FSAGDVVEVLVPEAQNGWLVGK    | Deamidated(N)@16; Label:13C(6)15N(2)(K)@22                                              |                                  | 0.0155355   | 2386.20947 | 1194.112 | 2386.1936  | 1194.10413 | 2 | 21 | 20.3262 | 0.51  |
| 65 | 25.39 | 29.86 | 33.5 BAIAP2L2_FlexIII | 99.0 HLNSDLVEVVQTFHGGLQHMEK    | Label:13C(6)15N(2)(K)@23                                                                |                                  | -0.00715907 | 2638.33447 | 660.5909 | 2638.34418 | 660.592712 | 4 | 18 | 19.4168 | 0.51  |
| 65 | 25.39 | 29.86 | 33.5 BAIAP2L2_FlexIII | 99.0 LHAQMQAOFVSESQR           | Label:13C(6)15N(4)(R)@14                                                                |                                  | 0.0109169   | 1640.80762 | 821.4111 | 1640.79688 | 821.405701 | 2 | 19 | 16.34   | 0.51  |
| 65 | 25.39 | 29.86 | 33.5 BAIAP2L2_FlexIII | 99.0 QHYELEVR                  | Gln->pyro-Glu@N-term; Label:13C(6)15N(4)(R)@8                                           |                                  | 9.59E-05    | 1129.50684 | 565.7607 | 1129.50684 | 565.760681 | 2 | 11 | 16.3935 | 0.51  |
| 65 | 25.39 | 29.86 | 33.5 BAIAP2L2_FlexIII | 99.0 RSSMGSTAVATDVK            | Label:13C(6)15N(4)(R)@1; Label:13C(6)15N(2)(K)@14                                       | missed R-S@1                     | -0.00072768 | 1426.71973 | 476.5805 | 1426.72046 | 476.58078  | 3 | 12 | 14.3275 | 0.51  |
| 65 | 25.39 | 29.86 | 33.5 BAIAP2L2_FlexIII | 99.0 SSMGSTAVATDVKK            | Label:13C(6)15N(2)(K)@13; Label:13C(6)15N(2)(K)@14                                      | missed K-K@13                    | 0.007075    | 1396.72742 | 699.371  | 1396.72034 | 699.367342 | 2 | 17 | 14.2035 | 0.51  |
| 65 | 25.39 | 29.86 | 33.5 BAIAP2L2_FlexIII | 99.0 LDMQFIKDSR                | Label:13C(6)15N(2)(K)@7; Label:13C(6)15N(4)(R)@10                                       | missed K-D@7                     | -0.0034634  | 1269.64722 | 635.8309 | 1269.65064 | 635.832581 | 2 | 10 | 17.1719 | 0.51  |
| 65 | 25.39 | 29.86 | 33.5 BAIAP2L2_FlexIII | 99.0 LMSSEQYPQOELFPR           | Deamidated(Q)@6; Label:13C(6)15N(4)(R)@15                                               |                                  | 0.0191863   | 1831.88831 | 916.9514 | 1831.86902 | 916.941773 | 2 | 12 | 18.2721 | 0.51  |
| 65 | 25.39 | 29.86 | 33.5 BAIAP2L2_FlexIII | 99.0 ALVSHSEGANHLLR            | Label:13C(6)15N(4)(R)@15                                                                |                                  | 0.00889863  | 1613.86023 | 538.9607 | 1613.85132 | 538.957703 | 3 | 13 | 14.929  | 0.51  |
| 65 | 25.39 | 29.86 | 33.5 BAIAP2L2_FlexIII | 99.0 IRYPTFLYK                 | Label:13C(6)15N(4)(R)@2; Label:13C(6)15N(2)(K)@9                                        | cleaved L-I@N-term; missed R-Y@2 | -0.0003413  | 1217.69251 | 609.8535 | 1217.69275 | 609.853638 | 2 | 12 | 17.9401 | 0.51  |
| 65 | 25.39 | 29.86 | 33.5 BAIAP2L2_FlexIII | 99.0 IRYPTFLYK                 | Label:13C(6)15N(4)(R)@2; Label:13C(6)15N(2)(K)@9                                        | cleaved L-I@N-term; missed R-Y@2 | -0.00693311 | 1217.68891 | 609.8502 | 1217.69275 | 609.853638 | 2 | 11 | 17.6713 | 0.51  |
| 65 | 25.39 | 29.86 | 33.5 BAIAP2L2_FlexIII | 99.0 LHAQMQAOFVSESQR           | Label:13C(6)15N(4)(R)@14                                                                |                                  | 0.00336824  | 1640.80017 | 547.9407 | 1640.79688 | 547.939575 | 3 | 15 | 16.3366 | 0.51  |
| 65 | 25.39 | 29.86 | 33.5 BAIAP2L2_FlexIII | 99.0 LHAQMQAOFVSESQR           | Label:13C(6)15N(4)(R)@14                                                                |                                  | 0.00336824  | 1640.80017 | 547.9407 | 1640.79688 | 547.939575 | 3 | 13 | 26.6386 | 0.51  |
| 65 | 25.39 | 29.86 | 33.5 BAIAP2L2_FlexIII | 99.0 RSSMGSTAVATDVK            | Label:13C(6)15N(4)(R)@1; Label:13C(6)15N(2)(K)@14                                       | missed R-S@1                     | -0.00151035 | 1426.71912 | 714.3668 | 1426.72046 | 714.367554 | 2 | 11 | 14.3602 | 0.51  |
| 65 | 25.39 | 29.86 | 33.5 BAIAP2L2_FlexIII | 99.0 YPTFLYK                   | Label:13C(6)15N(2)(K)@7                                                                 |                                  | -0.00165037 | 938.497681 | 470.2561 | 938.499329 | 470.256928 | 2 | 9  | 18.0092 | 0.51  |
| 65 | 25.39 | 29.86 | 33.5 BAIAP2L2_FlexIII | 99.0 YPTFLYK                   | Label:13C(6)15N(2)(K)@7                                                                 |                                  | 0.00020099  | 938.499451 | 470.257  | 938.499329 | 470.256928 | 2 | 9  | 17.9008 | 0.51  |
| 65 | 25.39 | 29.86 | 33.5 BAIAP2L2_FlexIII | 99.0 YPTFLYK                   | Label:13C(6)15N(2)(K)@7                                                                 |                                  | -0.00091407 | 938.498474 | 470.2565 | 938.499329 | 470.256928 | 2 | 9  | 17.7612 | 0.51  |
| 67 | 22.59 | 26.91 | 26.5 HCK_FlexIII      | 99.0 FLOVGGNTFSK               | Label:13C(6)15N(2)(K)@11                                                                |                                  | 0.00038458  | 1204.63342 | 603.324  | 1204.63318 | 603.328533 | 2 | 11 | 17.2287 | 0.80  |
| 67 | 22.59 | 26.91 | 26.5 HCK_FlexIII      | 99.0 KLGAGQFGEVWMATYNK         | Label:13C(6)15N(2)(K)@1; Deamidated(Q)@6; Label:13C(6)15N(2)(K)@17                      | missed K-L@1                     | 0.0175459   | 1915.96484 | 958.9897 | 1915.94727 | 958.980597 | 2 | 15 | 18.5113 | 0.80  |
| 67 | 22.59 | 26.91 | 26.5 HCK_FlexIII      | 99.0 KLGAGQFGEVWMATYNK         | Deamidated(Q)@5; Label:13C(6)15N(2)(K)@16                                               |                                  | 0.0267774   | 1779.86511 | 890.9398 | 1779.83814 | 890.926331 | 2 | 13 | 19.2147 | 0.80  |
| 67 | 22.59 | 26.91 | 26.5 HCK_FlexIII      | 99.0 QLLAPGNMLGSGFMIR          | Label:13C(6)15N(4)(R)@15                                                                |                                  | -0.00694848 | 1656.86511 | 829.4398 | 1656.87195 | 829.443237 | 2 | 16 | 20.3476 | 0.80  |
| 67 | 22.59 | 26.91 | 26.5 HCK_FlexIII      | 99.0 STFSTLQELVDHYK            | Label:13C(6)15N(2)(K)@7                                                                 |                                  | 0.0104979   | 1674.84485 | 838.4297 | 1674.83447 | 838.4245   | 2 | 15 | 19.6234 | 0.80  |
| 67 | 22.59 | 26.91 | 26.5 HCK_FlexIII      | 99.0 STFSTLQELVDHYK            | Label:13C(6)15N(2)(K)@14; Label:13C(6)15N(2)(K)@15                                      | missed K-K@14                    | 0.013984    | 1810.95752 | 604.6598 | 1810.94348 | 604.655151 | 3 | 13 | 18.8857 | 0.80  |
| 67 | 22.59 | 26.91 | 26.5 HCK_FlexIII      | 99.0 TLDNGGFYSR                | Deamidated(N)@4; Label:13C(                                                             |                                  |             |            |          |            |            |   |    |         |       |

|    |       |       |                        |                                     |                                                                                       |                    |             |            |          |            |            |   |    |         |       |
|----|-------|-------|------------------------|-------------------------------------|---------------------------------------------------------------------------------------|--------------------|-------------|------------|----------|------------|------------|---|----|---------|-------|
| 67 | 22.59 | 26.91 | 26.5 HCK_FlexIII       | 99.0 YPTFLYK                        | Label: 13C(6)15N(2)(K) @ 7                                                            | cleaved P-Y@N-term | -0.00091407 | 938.498474 | 470.2565 | 938.499329 | 470.256928 | 2 | 9  | 17.7612 | 0.80  |
| 68 | 22.06 | 24.16 | 23.2 FSCN3_FlexIII     | 99.0 ADOSGTLADSEDIR                 | Label: 13C(6)15N(4)(R) @ 16                                                           |                    | 0.00574495  | 1700.81506 | 851.4148 | 1700.8092  | 851.411926 | 2 | 19 | 17.3701 | 1.45  |
| 68 | 22.06 | 24.16 | 23.2 FSCN3_FlexIII     | 99.0 AVMDAGHPLESDTFFR               | Label: 13C(6)15N(4)(R) @ 16                                                           |                    | 0.00735685  | 1801.8407  | 901.9276 | 1801.83325 | 901.92395  | 2 | 15 | 17.752  | 1.45  |
| 68 | 22.06 | 24.16 | 23.2 FSCN3_FlexIII     | 99.0 FISVIYDGEVR                    | Label: 13C(6)15N(4)(R) @ 11                                                           |                    | -0.0106897  | 1306.66907 | 654.3418 | 1306.67969 | 654.347107 | 2 | 13 | 18.2079 | 1.45  |
| 68 | 22.06 | 24.16 | 23.2 FSCN3_FlexIII     | 99.0 MSLFQFECDESPTVQLR              | Propionamide(C) @ 8; Label: 13C(6)15N(4)(R) @ 18                                      |                    | -0.00875243 | 2196.99731 | 1099.506 | 2197.00586 | 1099.51025 | 2 | 21 | 19.3838 | 1.45  |
| 68 | 22.06 | 24.16 | 23.2 FSCN3_FlexIII     | 99.0 OTWEILVLSNEHETQAVVR            | Gln->pyro-Glu @ N-term; Label: 13C(6)15N(4)(R) @ 18                                   |                    | -0.00119735 | 2131.05542 | 1066.535 | 2131.05737 | 1066.53601 | 2 | 20 | 19.1852 | 1.45  |
| 68 | 22.06 | 24.16 | 23.2 FSCN3_FlexIII     | 99.0 RQTWEILVLSNEHETQAVVR           | Label: 13C(6)15N(4)(R) @ 1; Deamidated(N) @ 10; Label: 13C(6)15N(4)(R) @ 19           | missed R-Q @ 1     | 0.0291548   | 2315.2063  | 772.7427 | 2315.17725 | 772.733032 | 3 | 12 | 26.6156 | 1.45  |
| 68 | 22.06 | 24.16 | 23.2 FSCN3_FlexIII     | 99.0 TSHHGCFLLR                     | Propionamide(C) @ 3; Label: 13C(6)15N(4)(R) @ 10                                      |                    | -0.00243476 | 1250.61939 | 417.8804 | 1250.62183 | 417.881195 | 3 | 11 | 15.6534 | 1.45  |
| 68 | 22.06 | 24.16 | 23.2 FSCN3_FlexIII     | 99.0 DGCYHLETSTHHFLSHVDR            | Propionamide(C) @ 3; Label: 13C(6)15N(4)(R) @ 19                                      |                    | 0.00797397  | 2334.05566 | 584.5212 | 2334.04761 | 584.519165 | 4 | 11 | 16.061  | 1.45  |
| 68 | 22.06 | 24.16 | 23.2 FSCN3_FlexIII     | 99.0 SANGYYLSQR                     | Deamidated(N) @ 3; Label: 13C(6)15N(4)(R) @ 10                                        |                    | -6.84E-05   | 1168.53882 | 585.2767 | 1168.53882 | 585.276672 | 2 | 12 | 15.7571 | 1.45  |
| 68 | 22.06 | 24.16 | 23.2 FSCN3_FlexIII     | 99.0 YGVYSSSGHDLIQCNOQDPDR          | Deamidated(Q) @ 14; Propionamide(C) @ 15; Label: 13C(6)15N(4)(R) @ 22                 |                    | 0.0230966   | 2520.10791 | 841.0433 | 2520.08521 | 841.035645 | 3 | 13 | 16.0341 | 1.45  |
| 68 | 22.06 | 24.16 | 23.2 FSCN3_FlexIII     | 99.0 MSLFQFECDESPTVQLR              | Deamidated(Q) @ 5; Propionamide(C) @ 8; Label: 13C(6)15N(4)(R) @ 18                   |                    | 0.00548477  | 2197.99536 | 733.6724 | 2197.98999 | 733.670593 | 3 | 16 | 19.3926 | 1.45  |
| 68 | 22.06 | 24.16 | 23.2 FSCN3_FlexIII     | 99.0 RQTWEILVLSNEHETQAVVR           | Label: 13C(6)15N(4)(R) @ 1; Deamidated(N) @ 10; Label: 13C(6)15N(4)(R) @ 19           | missed R-Q @ 1     | 0.0291548   | 2315.2063  | 772.7427 | 2315.17725 | 772.733032 | 3 | 12 | 17.4902 | 1.45  |
| 68 | 22.06 | 24.16 | 23.2 FSCN3_FlexIII     | 99.0 RQTWEILVLSNEHETQAVVR           | Label: 13C(6)15N(4)(R) @ 1; Deamidated(N) @ 10; Label: 13C(6)15N(4)(R) @ 19           | missed R-Q @ 1     | 0.0379581   | 2315.21533 | 579.8111 | 2315.17725 | 579.801575 | 4 | 9  | 26.6812 | 1.45  |
| 68 | 22.06 | 24.16 | 23.2 FSCN3_FlexIII     | 99.0 SANGYYLSQR                     | Label: 13C(6)15N(4)(R) @ 10                                                           |                    | 0.00237125  | 1167.55725 | 584.7859 | 1167.55481 | 584.784668 | 2 | 10 | 15.4945 | 1.45  |
| 68 | 22.06 | 24.16 | 23.2 FSCN3_FlexIII     | 99.0 YPTFLYK                        | Label: 13C(6)15N(2)(K) @ 7                                                            | cleaved F-Y@N-term | -0.00165037 | 938.497681 | 470.2561 | 938.499329 | 470.256928 | 2 | 9  | 18.0092 | 1.45  |
| 68 | 22.06 | 24.16 | 23.2 FSCN3_FlexIII     | 99.0 YPTFLYK                        | Label: 13C(6)15N(2)(K) @ 7                                                            | cleaved F-Y@N-term | 0.00020099  | 938.499451 | 470.257  | 938.499329 | 470.256928 | 2 | 9  | 17.9008 | 1.45  |
| 68 | 22.06 | 24.16 | 23.2 FSCN3_FlexIII     | 99.0 YPTFLYK                        | Label: 13C(6)15N(2)(K) @ 7                                                            | cleaved F-Y@N-term | -0.00091407 | 938.498474 | 470.2565 | 938.499329 | 470.256928 | 2 | 9  | 17.7612 | 1.45  |
| 70 | 21.59 | 23.62 | 34.5 NLE1_FlexIII      | 99.0 ILTGHTQSVTCLR                  | Propionamide(C) @ 11; Label: 13C(6)15N(4)(R) @ 13                                     |                    | 0.00175001  | 1508.80273 | 755.4086 | 1508.8009  | 755.407715 | 2 | 12 | 15.5567 | 25.98 |
| 70 | 21.59 | 23.62 | 34.5 NLE1_FlexIII      | 99.0 LLLVSGSSDSTLK                  | Label: 13C(6)15N(2)(K) @ 12                                                           |                    | -0.00162985 | 1213.66284 | 607.8387 | 1213.66455 | 607.839539 | 2 | 13 | 15.9803 | 25.98 |
| 70 | 21.59 | 23.62 | 34.5 NLE1_FlexIII      | 99.0 LQVCNALLAAGDPLPAFFVHDAEIVSSLGK | Propionamide(C) @ 5; Deamidated(Q) @ 11; Label: 13C(6)15N(2)(K) @ 32                  |                    | 0.0417411   | 3529.90405 | 1177.642 | 3529.86231 | 1177.62805 | 3 | 16 | 20.653  | 25.98 |
| 70 | 21.59 | 23.62 | 34.5 NLE1_FlexIII      | 99.0 LVSGSDDFTLFLWSPAEDKKPLTR       | Label: 13C(6)15N(2)(K) @ 19; Label: 13C(6)15N(2)(K) @ 20; Label: 13C(6)15N(4)(R) @ 24 | missed K-K @ 19    | 0.0167732   | 2747.45483 | 687.871  | 2747.43799 | 687.86676  | 4 | 13 | 19.5867 | 25.98 |
| 70 | 21.59 | 23.62 | 34.5 NLE1_FlexIII      | 99.0 MTGHQALNQVLFPSPDSR             | Label: 13C(6)15N(4)(R) @ 18                                                           |                    | -0.00980401 | 2023.00952 | 1012.512 | 2023.01843 | 1012.51648 | 2 | 21 | 18.4368 | 25.98 |
| 70 | 21.59 | 23.62 | 34.5 NLE1_FlexIII      | 99.0 NGQILLWDPSTGK                  | Label: 13C(6)15N(2)(K) @ 13                                                           |                    | -0.04757    | 1435.70752 | 718.861  | 1435.75513 | 718.884827 | 2 | 12 | 16.6895 | 25.98 |
| 70 | 21.59 | 23.62 | 34.5 NLE1_FlexIII      | 99.0 VLDIYQPOAIFR                   | Label: 13C(6)15N(4)(R) @ 13                                                           |                    | -0.00249108 | 1584.88782 | 793.4512 | 1584.89038 | 793.452454 | 2 | 14 | 19.7305 | 25.98 |
| 70 | 21.59 | 23.62 | 34.5 NLE1_FlexIII      | 99.0 WGGDGLLYASODR                  | Label: 13C(6)15N(4)(R) @ 14                                                           |                    | -0.00104768 | 1533.70764 | 767.8611 | 1533.70874 | 767.861633 | 2 | 12 | 17.9583 | 25.98 |
| 70 | 21.59 | 23.62 | 34.5 NLE1_FlexIII      | 99.0 WITGLSWEPLHANPECR              | Propionamide(C) @ 16; Label: 13C(6)15N(4)(R) @ 17                                     |                    | -0.00663335 | 2089.00122 | 697.341  | 2089.00781 | 697.343262 | 3 | 14 | 18.9891 | 25.98 |
| 70 | 21.59 | 23.62 | 34.5 NLE1_FlexIII      | 99.0 YLASGSGDITVR                   | Label: 13C(6)15N(4)(R) @ 12                                                           |                    | 0.00500752  | 1235.6073  | 618.8109 | 1235.60217 | 618.80835  | 2 | 13 | 14.4457 | 25.98 |
| 70 | 21.59 | 23.62 | 34.5 NLE1_FlexIII      | 99.0 ILTGHTQSVTCLR                  | Propionamide(C) @ 11; Label: 13C(6)15N(4)(R) @ 13                                     |                    | 0.00042718  | 1508.80115 | 503.941  | 1508.8009  | 503.940888 | 3 | 11 | 15.5544 | 25.98 |
| 70 | 21.59 | 23.62 | 34.5 NLE1_FlexIII      | 99.0 MTGHQALNQVLFPSPDSR             | Deamidated(Q) @ 10; Label: 13C(6)15N(4)(R) @ 18                                       |                    | 0.0185619   | 2024.02124 | 675.681  | 2024.00244 | 675.674744 | 3 | 12 | 18.3212 | 25.98 |
| 70 | 21.59 | 23.62 | 34.5 NLE1_FlexIII      | 99.0 VLDIYQPOAIFR                   | Label: 13C(6)15N(4)(R) @ 13                                                           |                    | 0.00410073  | 1584.89453 | 793.4545 | 1584.89038 | 793.452454 | 2 | 11 | 19.9878 | 25.98 |
| 70 | 21.59 | 23.62 | 34.5 NLE1_FlexIII      | 99.0 WITGLSWEPLHANPECR              | Deamidated(N) @ 13; Propionamide(C) @ 16; Label: 13C(6)15N(4)(R) @ 17                 |                    | 0.0168709   | 2090.00928 | 1046.012 | 2089.99194 | 1046.00317 | 2 | 11 | 19.0218 | 25.98 |
| 70 | 21.59 | 23.62 | 34.5 NLE1_FlexIII      | 99.0 YPTFLYK                        | Label: 13C(6)15N(2)(K) @ 7                                                            |                    | -0.00165037 | 938.497681 | 470.2561 | 938.499329 | 470.256928 | 2 | 9  | 18.0092 | 25.98 |
| 70 | 21.59 | 23.62 | 34.5 NLE1_FlexIII      | 99.0 YPTFLYK                        | Label: 13C(6)15N(2)(K) @ 7                                                            |                    | 0.00020099  | 938.499451 | 470.257  | 938.499329 | 470.256928 | 2 | 9  | 17.9008 | 25.98 |
| 70 | 21.59 | 23.62 | 34.5 NLE1_FlexIII      | 99.0 YPTFLYK                        | Label: 13C(6)15N(2)(K) @ 7                                                            |                    | -0.00091407 | 938.498474 | 470.2565 | 938.499329 | 470.256928 | 2 | 9  | 17.7612 | 25.98 |
| 73 | 20.3  | 23.6  | 44.5 TNFRSF10B_FlexIII | 99.0 CDSGEVELSPCTTTR                | Propionamide(C) @ 1; Propionamide(C) @ 11; Label: 13C(6)15N(4)(R) @ 15                |                    | 0.0137854   | 1748.77222 | 875.3934 | 1748.75842 | 875.386536 | 2 | 19 | 15.7487 | 34.27 |
| 73 | 20.3  | 23.6  | 44.5 TNFRSF10B_FlexIII | 99.0 DASVHTLLDALETGLER              | Label: 13C(6)15N(4)(R) @ 17                                                           |                    | -0.00310016 | 1848.94263 | 617.3215 | 1848.94568 | 617.32251  | 3 | 17 | 20.3522 | 34.27 |
| 73 | 20.3  | 23.6  | 44.5 TNFRSF10B_FlexIII | 99.0 FMYLEGNADSAMSPTFLYK            | Deamidated(N) @ 7; Label: 13C(6)15N(2)(K) @ 20                                        |                    | 0.0245319   | 2356.07739 | 1179.046 | 2356.05225 | 1179.03345 | 2 | 18 | 19.7413 | 34.27 |
| 73 | 20.3  | 23.6  | 44.5 TNFRSF10B_FlexIII | 99.0 KGLGMDNEIK                     | Label: 13C(6)15N(2)(K) @ 1; Label: 13C(6)15N(2)(K) @ 10                               | missed K-L @ 1     | 0.00383739  | 1175.6593  | 588.8369 | 1175.65552 | 588.835022 | 2 | 16 | 16.3962 | 34.27 |
| 73 | 20.3  | 23.6  | 44.5 TNFRSF10B_FlexIII | 99.0 LLVPANEGDPTETLR                | Label: 13C(6)15N(4)(R) @ 15                                                           |                    | 0.00531513  | 1633.86023 | 817.9374 | 1633.8551  | 817.934815 | 2 | 15 | 17.2003 | 34.27 |
| 73 | 20.3  | 23.6  | 44.5 TNFRSF10B_FlexIII | 99.0 QCDFDADLVFPDSDWEPLMR           | Propionamide(C) @ 2; Label: 13C(6)15N(4)(R) @ 20                                      |                    | 0.00659932  | 2511.11743 | 1256.566 | 2511.11133 | 1256.56299 | 2 | 20 | 20.4928 | 34.27 |
| 73 | 20.3  | 23.6  | 44.5 TNFRSF10B_FlexIII | 99.0 QKIEDHLLSSGK                   | Gln->pyro-Glu @ N-term; Label: 13C(6)15N(2)(K) @ 2; Label: 13C(6)15N(2)(K) @ 12       | missed K-I @ 2     | 0.00095785  | 1352.72805 | 677.3713 | 1352.72705 | 677.370789 | 2 | 20 | 16.0556 | 34.27 |
| 73 | 20.3  | 23.6  | 44.5 TNFRSF10B_FlexIII | 99.0 VGDCPTPWSDIECVHK               | Propionamide(C) @ 4; Propionamide(C) @ 12; Label: 13C(6)15N(2)(K) @ 15                |                    | -0.00942747 | 1837.81238 | 613.6114 | 1837.8219  | 613.614563 | 3 | 17 | 17.4695 | 34.27 |
| 73 | 20.3  | 23.6  | 44.5 TNFRSF10B_FlexIII | 99.0 YGQDYSTHWNDLLFCLR              | Propionamide(C) @ 15; Label: 13C(6)15N(4)(R) @ 17                                     |                    | 0.00740438  | 2211.01538 | 1106.515 | 2211.0083  | 1106.51148 | 2 | 21 | 19.7105 | 34.27 |
| 73 | 20.3  | 23.6  | 44.5 TNFRSF10B_FlexIII | 99.0 SSPSEGLCPPGHISEDGR             | Propionamide(C) @ 8; Label: 13C(6)15N(4)(R) @ 19                                      |                    | 0.0189478   | 2041.93408 | 681.652  | 2041.91516 | 681.64563  | 3 | 11 | 14.7584 | 34.27 |
| 73 | 20.3  | 23.6  | 44.5 TNFRSF10B_FlexIII | 99.0 CDSGEVELSPCTTTR                | Propionamide(C) @ 1; Propionamide(C) @ 11; Label: 13C(6)15N(4)(R) @ 15                |                    | -0.0139245  | 1748.74463 | 875.3796 | 1748.75842 | 875.386536 | 2 | 19 | 15.7569 | 34.27 |
| 73 | 20.3  | 23.6  | 44.5 TNFRSF10B_FlexIII | 99.0 DASVHTLLDALETGLER              | Label: 13C(6)15N(4)(R) @ 17                                                           |                    | 0.0534545   | 1848.99902 | 617.3403 | 1848.94568 | 617.32251  | 3 | 12 | 20.3571 | 34.27 |
| 73 | 20.3  | 23.6  | 44.5 TNFRSF10B_FlexIII | 99.0 FMYLEGNADSAMSPTFLYK            | Deamidated(N) @ 7; Label: 13C(6)15N(2)(K) @ 20                                        |                    | 0.0127292   | 2356.06543 | 1179.04  | 2356.05225 | 1179.03345 | 2 | 16 | 19.8685 | 34.27 |
| 73 | 20.3  | 23.6  | 44.5 TNFRSF10B_FlexIII | 99.0 FMYLEGNADSAMSPTFLYK            | Deamidated(N) @ 7; Label: 13C(6)15N(2)(K) @ 20                                        |                    | 0.0139904   | 2356.06616 | 786.3627 | 2356.05225 | 786.359032 | 3 | 13 | 19.7763 | 34.27 |
| 73 | 20.3  | 23.6  | 44.5 TNFRSF10B_FlexIII | 99.0 KGLGMDNEIK                     | Label: 13C(6)15N(2)(K) @ 1; Label: 13C(6)15N(2)(K) @ 10                               | missed K-L @ 1     | -0.00792488 | 1175.64758 | 392.8898 | 1175.65552 | 392.892426 | 3 | 10 | 16.4114 | 34.27 |
| 73 | 20.3  | 23.6  | 44.5 TNFRSF10B_FlexIII | 99.0 LLVPANEGDPTETLR                | Label: 13C(6)15N(4)(R) @ 15                                                           |                    | 0.0100263   | 1633.86511 | 817.9398 | 1633.8551  | 817.934815 | 2 | 13 | 17.2586 | 34.27 |
| 73 | 20.3  | 23.6  | 44.5 TNFRSF10B_FlexIII | 99.0 LLVPANEGDPTETLR                | Label: 13C(6)15N(4)(R) @ 15                                                           |                    | -0.0102164  | 1633.84485 | 817.9297 | 1633.8551  | 817.934815 | 2 | 13 | 17.2577 | 34.27 |
| 73 | 20.3  | 23.6  | 44.5 TNFRSF10B_FlexIII | 99.0 QKIEDHLLSSGK                   | Gln->pyro-Glu @ N-term; Label: 13C(6)15N(2)(K) @ 2; Label: 13C(6)15N(2)(K) @ 12       | missed K-I @ 2     | 0.0118093   | 1352.73877 | 451.9202 | 1352.72705 | 451.91629  | 3 | 15 | 16.0477 | 34.27 |
| 73 | 20.3  | 23.6  | 44.5 TNFRSF10B_FlexIII | 99.0 SSPSEGLCPPGHISEDGR             | Propionamide(C) @ 8; Label: 13C(6)15N(4)(R) @ 19                                      |                    | 0.0016923   | 2041.91699 | 511.4865 | 2041.91516 | 511.486054 | 4 | 11 | 14.7476 | 34.27 |
| 73 | 20.3  | 23.6  | 44.5 TNFRSF10B_FlexIII | 99.0 VGDCPTPWSDIECVHK               | Propionamide(C) @ 4; Propionamide(C) @ 12; Label: 13C(6)15N(2)(K) @ 15                |                    | -0.00164636 | 1837.82019 | 613.614  | 1837.8219  | 613.614563 | 3 | 13 | 17.5248 | 34.27 |
| 73 | 20.3  | 23.6  | 44.5 TNFRSF10B_FlexIII | 99.0 YGQDYSTHWNDLLFCLR              | Propionamide(C) @ 15; Label: 13C(6)15N(4)(R) @ 17                                     |                    | 0.00143124  | 2211.00977 | 738.0105 | 2211.0083  | 738.010071 | 3 | 15 | 19.6925 | 34.27 |
| 73 | 20.3  | 23.6  | 44.5 TNFRSF10B_FlexIII | 99.0 YGQDYSTHWNDLLFCLR              | Deamidated(N) @ 10; Propionamide(C) @ 15; Label: 13C(6)15N(4)(R) @ 17                 |                    | 0.00337659  | 2211.99536 | 1107.005 | 2211.99219 | 1107.00342 | 2 | 14 | 19.6812 | 34.27 |
| 73 | 20.3  | 23.6  | 44.5 TNFRSF10B_FlexIII | 99.0 YGQDYSTHWNDLLFCLR              | Deamidated(Q) @ 3; Propionamide(C) @ 15; Label: 13C(6)15N(4)(R) @ 17                  |                    | 0.0130378   | 2212.00537 | 738.3424 | 2211.99219 | 738.338074 | 3 | 13 | 19.6475 | 34.27 |
| 73 | 20.3  | 23.6  | 44.                    |                                     |                                                                                       |                    |             |            |          |            |            |   |    |         |       |

|    |       |       |                       |                                    |                                                                                                  |                              |             |            |          |            |            |   |    |         |       |
|----|-------|-------|-----------------------|------------------------------------|--------------------------------------------------------------------------------------------------|------------------------------|-------------|------------|----------|------------|------------|---|----|---------|-------|
| 74 | 19.77 | 22.05 | 31.7 CD2_Flexiil      | 99.0 TDDQDIYKVSIDYTK               | Label:13C(6)15N(2)(K)@8; Label:13C(6)15N(2)(K)@15                                                | missed K-V@8                 | -0.00031038 | 1818.8855  | 910.45   | 1818.88586 | 910.450195 | 2 | 22 | 16.9648 | 11.54 |
| 74 | 19.77 | 22.05 | 31.7 CD2_Flexiil      | 99.0 VOHQPOKRRPPASGTQVHQOK         | Deamidated(Q)@6; Label:13C(6)15N(2)(K)@7; Label:13C(6)15N(4)(R)@8; Label:13C(6)15N(2)(K)@21      | missed K-R@7                 | 0.0347518   | 2402.3125  | 481.4698 | 2402.27783 | 481.46283  | 5 | 12 | 9.5282  | 11.54 |
| 74 | 19.77 | 22.05 | 31.7 CD2_Flexiil      | 99.0 GRKQQQIPASTPQNPNATSQHPPPPGHR  | Label:13C(6)15N(4)(R)@2; Label:13C(6)15N(2)(K)@3; Deamidated(N)@14; Label:13C(6)15N(4)(R)@28     | missed R-K@2                 | 0.00170357  | 3006.55444 | 502.0997 | 3006.55298 | 502.099457 | 6 | 13 | 14.9309 | 11.54 |
| 74 | 19.77 | 22.05 | 31.7 CD2_Flexiil      | 99.0 HLKTDQQDIYK                   | Label:13C(6)15N(2)(K)@3; Label:13C(6)15N(2)(K)@11                                                | missed K-T@3                 | 0.00040685  | 1390.70679 | 464.5762 | 1390.7063  | 464.57605  | 3 | 15 | 14.1401 | 11.54 |
| 74 | 19.77 | 22.05 | 31.7 CD2_Flexiil      | 99.0 RNDEELETR                     | Label:13C(6)15N(4)(R)@1; Label:13C(6)15N(4)(R)@9                                                 | missed R-N@1                 | 0.00579762  | 1180.5647  | 591.2896 | 1180.55872 | 591.286621 | 2 | 14 | 11.9593 | 11.54 |
| 74 | 19.77 | 22.05 | 31.7 CD2_Flexiil      | 99.0 RNDEELETR                     | Label:13C(6)15N(4)(R)@1; Label:13C(6)15N(4)(R)@9                                                 | missed R-N@1                 | 0.00579762  | 1180.5647  | 591.2896 | 1180.55872 | 591.286621 | 2 | 11 | 12.2232 | 11.54 |
| 74 | 19.77 | 22.05 | 31.7 CD2_Flexiil      | 99.0 RPPAPSGTQVHQOK                | Label:13C(6)15N(4)(R)@1; Label:13C(6)15N(2)(K)@14                                                |                              | -0.00032523 | 1547.82837 | 516.9501 | 1547.82874 | 516.950195 | 3 | 18 | 8.7008  | 11.54 |
| 74 | 19.77 | 22.05 | 31.7 CD2_Flexiil      | 99.0 RPPAPSGTQVHQOK                | Label:13C(6)15N(4)(R)@1; Label:13C(6)15N(2)(K)@14                                                |                              | -0.00142386 | 1547.82727 | 516.9497 | 1547.82874 | 516.950195 | 3 | 18 | 8.9542  | 11.54 |
| 74 | 19.77 | 22.05 | 31.7 CD2_Flexiil      | 99.0 RPPAPSGTQVHQOK                | Label:13C(6)15N(4)(R)@1; Label:13C(6)15N(2)(K)@14                                                |                              | -0.00050834 | 1547.82825 | 516.95   | 1547.82874 | 516.950195 | 3 | 18 | 9.2238  | 11.54 |
| 74 | 19.77 | 22.05 | 31.7 CD2_Flexiil      | 99.0 RPPAPSGTQVHQOK                | Label:13C(6)15N(4)(R)@1; Label:13C(6)15N(2)(K)@14                                                |                              | 0.00059029  | 1547.82935 | 516.9504 | 1547.82874 | 516.950195 | 3 | 12 | 8.4414  | 11.54 |
| 74 | 19.77 | 22.05 | 31.7 CD2_Flexiil      | 99.0 RPPAPSGTQVHQOK                | Label:13C(6)15N(4)(R)@1; Label:13C(6)15N(2)(K)@14                                                |                              | 0.00040719  | 1547.8291  | 516.9503 | 1547.82874 | 516.950195 | 3 | 14 | 9.4796  | 11.54 |
| 74 | 19.77 | 22.05 | 31.7 CD2_Flexiil      | 99.0 RPPAPSGTQVHQOK                | Label:13C(6)15N(4)(R)@1; Deamidated(Q)@13; Label:13C(6)15N(2)(K)@14                              |                              | 0.00460986  | 1548.81738 | 517.2797 | 1548.81274 | 517.278198 | 3 | 14 | 9.7452  | 11.54 |
| 74 | 19.77 | 22.05 | 31.7 CD2_Flexiil      | 99.0 RPPAPSGTQVHQOK                | Label:13C(6)15N(4)(R)@1; Label:13C(6)15N(2)(K)@14                                                |                              | -0.00494617 | 1547.82385 | 774.9192 | 1547.82874 | 774.921631 | 2 | 11 | 8.8999  | 11.54 |
| 74 | 19.77 | 22.05 | 31.7 CD2_Flexiil      | 99.0 YPTFLYK                       | Label:13C(6)15N(2)(K)@7                                                                          | cleaved N-Y@N-term           | -0.00165037 | 938.497681 | 470.2561 | 938.499329 | 470.256928 | 2 | 9  | 18.0092 | 11.54 |
| 74 | 19.77 | 22.05 | 31.7 CD2_Flexiil      | 99.0 YPTFLYK                       | Label:13C(6)15N(2)(K)@7                                                                          | cleaved N-Y@N-term           | 0.00020099  | 938.499451 | 470.257  | 938.499329 | 470.256928 | 2 | 9  | 17.9008 | 11.54 |
| 74 | 19.77 | 22.05 | 31.7 CD2_Flexiil      | 99.0 YPTFLYK                       | Label:13C(6)15N(2)(K)@7                                                                          | cleaved N-Y@N-term           | -0.00091407 | 938.498474 | 470.2565 | 938.499329 | 470.256928 | 2 | 9  | 17.7612 | 11.54 |
| 76 | 18.62 | 20.7  | 20.8 TNFRSF1A_Flexiil | 99.0 DMDLLGLEDIEEALCGPAALPPAPSLLR  | Propionamide(C)@7; Propionamide(C)@16; Label:13C(6)15N(4)(R)@29                                  |                              | -0.0064592  | 3173.56104 | 1058.861 | 3173.5686  | 1058.86353 | 3 | 22 | 20.7171 | 1.24  |
| 76 | 18.62 | 20.7  | 20.8 TNFRSF1A_Flexiil | 99.0 EAQYSMLATWR                   | Label:13C(6)15N(4)(R)@11                                                                         |                              | 0.00070859  | 1364.64282 | 683.3287 | 1364.64221 | 683.328369 | 2 | 11 | 18.4551 | 1.24  |
| 76 | 18.62 | 20.7  | 20.8 TNFRSF1A_Flexiil | 99.0 ECESGSFTASENHRLR              | Propionamide(C)@2; Label:13C(6)15N(4)(R)@15                                                      |                              | 0.00766393  | 1746.75842 | 583.2601 | 1746.75073 | 583.257507 | 3 | 12 | 15.2213 | 1.24  |
| 76 | 18.62 | 20.7  | 20.8 TNFRSF1A_Flexiil | 99.0 QNTVCTCHAGFFLR                | Gln->pyro-Glu@N-term; Propionamide(C)@5; Propionamide(C)@7; Label:13C(6)15N(4)(R)@14             |                              | -0.00251608 | 1730.78711 | 866.4008 | 1730.78967 | 866.4021   | 2 | 21 | 18.2177 | 1.24  |
| 76 | 18.62 | 20.7  | 20.8 TNFRSF1A_Flexiil | 99.0 REATLELLGR                    | Label:13C(6)15N(4)(R)@1; Label:13C(6)15N(4)(R)@10                                                | missed R-E@1                 | -0.00195007 | 1176.67114 | 393.231  | 1176.67297 | 393.231598 | 3 | 10 | 17.1041 | 1.24  |
| 76 | 18.62 | 20.7  | 20.8 TNFRSF1A_Flexiil | 99.0 REVAPPYQAGADPILATALSDPIPNPLOK | Label:13C(6)15N(4)(R)@1; Deamidated(Q)@8; Label:13C(6)15N(2)(K)@29                               | missed R-E@1                 | 0.0167332   | 3060.64111 | 1021.221 | 3060.625   | 1021.21564 | 3 | 16 | 19.787  | 1.24  |
| 76 | 18.62 | 20.7  | 20.8 TNFRSF1A_Flexiil | 99.0 YIHPQNNISICCTK                | Propionamide(C)@10; Propionamide(C)@11; Label:13C(6)15N(2)(K)@13                                 |                              | 8.58E-05    | 1669.77979 | 557.6005 | 1669.77954 | 557.600464 | 3 | 13 | 14.5592 | 1.24  |
| 76 | 18.62 | 20.7  | 20.8 TNFRSF1A_Flexiil | 99.0 EATLELLGR                     | Label:13C(6)15N(4)(R)@9                                                                          |                              | 0.00156303  | 1010.56525 | 506.2899 | 1010.5636  | 506.289063 | 2 | 9  | 17.9164 | 1.24  |
| 76 | 18.62 | 20.7  | 20.8 TNFRSF1A_Flexiil | 99.0 WEDSAHKPQSLDTPATLYAVVENVPPLR  | Label:13C(6)15N(2)(K)@7; Deamidated(Q)@9; Label:13C(6)15N(4)(R)@30                               |                              | 0.00549953  | 3381.65405 | 846.4208 | 3381.64844 | 846.419373 | 4 | 11 | 19.1001 | 1.24  |
| 76 | 18.62 | 20.7  | 20.8 TNFRSF1A_Flexiil | 99.0 QNTVCTCHAGFFLR                | Propionamide(C)@5; Propionamide(C)@7; Label:13C(6)15N(4)(R)@14                                   |                              | 0.0108982   | 1747.82703 | 874.9208 | 1747.81616 | 874.915405 | 2 | 12 | 17.4827 | 1.24  |
| 76 | 18.62 | 20.7  | 20.8 TNFRSF1A_Flexiil | 99.0 REVAPPYQAGADPILATALSDPIPNPLOK | Label:13C(6)15N(4)(R)@1; Label:13C(6)15N(2)(K)@8; Label:13C(6)15N(2)(K)@29                       | missed R-E@1                 | 0.0279404   | 3060.65283 | 766.1705 | 3060.625   | 766.163513 | 4 | 12 | 19.8658 | 1.24  |
| 76 | 18.62 | 20.7  | 20.8 TNFRSF1A_Flexiil | 99.0 WEDSAHKPQSLDTPATLYAVVENVPPLR  | Label:13C(6)15N(2)(K)@7; Deamidated(Q)@9; Label:13C(6)15N(4)(R)@30                               |                              | 0.0168898   | 3381.66504 | 677.3403 | 3381.64844 | 677.336975 | 5 | 11 | 19.2129 | 1.24  |
| 76 | 18.62 | 20.7  | 20.8 TNFRSF1A_Flexiil | 99.0 YIHPQNNISICCTK                | Propionamide(C)@10; Propionamide(C)@11; Label:13C(6)15N(2)(K)@13                                 |                              | 0.0073723   | 1669.78711 | 835.9008 | 1669.77954 | 835.897095 | 2 | 18 | 14.5838 | 1.24  |
| 76 | 18.62 | 20.7  | 20.8 TNFRSF1A_Flexiil | 99.0 YPTFLYK                       | Label:13C(6)15N(2)(K)@7                                                                          |                              | -0.00165037 | 938.497681 | 470.2561 | 938.499329 | 470.256928 | 2 | 9  | 18.0092 | 1.24  |
| 76 | 18.62 | 20.7  | 20.8 TNFRSF1A_Flexiil | 99.0 YPTFLYK                       | Label:13C(6)15N(2)(K)@7                                                                          |                              | 0.00020099  | 938.499451 | 470.257  | 938.499329 | 470.256928 | 2 | 9  | 17.9008 | 1.24  |
| 76 | 18.62 | 20.7  | 20.8 TNFRSF1A_Flexiil | 99.0 YPTFLYK                       | Label:13C(6)15N(2)(K)@7                                                                          |                              | -0.00091407 | 938.498474 | 470.2565 | 938.499329 | 470.256928 | 2 | 9  | 17.7612 | 1.24  |
| 77 | 18.56 | 20.75 | 31.4 HOXA3_Flexiil    | 99.0 AHELSEACLR                    | Propionamide(C)@8; Label:13C(6)15N(4)(R)@10                                                      |                              | -0.00057057 | 1208.58423 | 605.2994 | 1208.58472 | 605.299622 | 2 | 13 | 14.9777 | 2.41  |
| 77 | 18.56 | 20.75 | 31.4 HOXA3_Flexiil    | 99.0 KGMLTSSGGQSPSR                | Label:13C(6)15N(2)(K)@2; Label:13C(6)15N(4)(R)@15                                                | missed K-G@2                 | -0.00268014 | 1466.72412 | 734.3693 | 1466.72669 | 734.370606 | 2 | 13 | 13.2359 | 2.41  |
| 77 | 18.56 | 20.75 | 31.4 HOXA3_Flexiil    | 99.0 GMLTSSGGQSPSR                 | Label:13C(6)15N(4)(R)@13                                                                         |                              | -0.0114586  | 1273.58472 | 637.7996 | 1273.59607 | 637.805298 | 2 | 15 | 14.2816 | 2.41  |
| 77 | 18.56 | 20.75 | 31.4 HOXA3_Flexiil    | 99.0 LTHLYPTFLYK                   | Label:13C(6)15N(2)(K)@11                                                                         |                              | -0.00946883 | 1402.76453 | 702.3895 | 1402.77405 | 702.394287 | 2 | 15 | 18.1859 | 2.41  |
| 77 | 18.56 | 20.75 | 31.4 HOXA3_Flexiil    | 99.0 RVEVMALLNLTR                  | Label:13C(6)15N(4)(R)@1; Label:13C(6)15N(4)(R)@13                                                | missed R-V@1                 | 0.00149013  | 1577.84766 | 526.9565 | 1577.84619 | 526.956055 | 3 | 15 | 18.526  | 2.41  |
| 77 | 18.56 | 20.75 | 31.4 HOXA3_Flexiil    | 99.0 SPLNPSPTVAK                   | Label:13C(6)15N(2)(K)@11                                                                         |                              | -8.98E-05   | 1133.65344 | 567.834  | 1133.65356 | 567.834045 | 2 | 12 | 15.9679 | 2.41  |
| 77 | 18.56 | 20.75 | 31.4 HOXA3_Flexiil    | 99.0 TAYTSAQLVELEKEFHNR            | Deamidated(Q)@7; Label:13C(6)15N(2)(K)@13; Label:13C(6)15N(4)(R)@19                              | missed K-E@13                | 0.0160036   | 2301.15552 | 768.0591 | 2301.13965 | 768.053833 | 3 | 15 | 18.6007 | 2.41  |
| 77 | 18.56 | 20.75 | 31.4 HOXA3_Flexiil    | 99.0 TSSSSSGESCAGDSPPGQASSK        | Propionamide(C)@10; Label:13C(6)15N(2)(K)@14; Label:13C(6)15N(2)(K)@23                           | missed K-S@14                | 0.00243916  | 2227.98584 | 743.6692 | 2227.9834  | 743.668396 | 3 | 17 | 8.3951  | 2.41  |
| 77 | 18.56 | 20.75 | 31.4 HOXA3_Flexiil    | 99.0 TSSSSSGESCAGDSPPGQASSKR       | Propionamide(C)@10; Label:13C(6)15N(2)(K)@14; Label:13C(6)15N(2)(K)@23; Label:13C(6)15N(4)(R)@24 | missed K-S@14; missed K-R@23 | -0.0029928  | 2394.08984 | 599.5297 | 2394.09277 | 599.530457 | 4 | 12 | 7.7668  | 2.41  |
| 77 | 18.56 | 20.75 | 31.4 HOXA3_Flexiil    | 99.0 AHELSEACLR                    | Propionamide(C)@8; Label:13C(6)15N(4)(R)@10                                                      |                              | 0.00435403  | 1208.58911 | 403.8703 | 1208.58472 | 403.868866 | 3 | 12 | 14.9301 | 2.41  |
| 77 | 18.56 | 20.75 | 31.4 HOXA3_Flexiil    | 99.0 AHELSEACLR                    | Propionamide(C)@8                                                                                |                              | 0.00255323  | 1198.57898 | 400.5336 | 1198.57642 | 400.532776 | 3 | 11 | 15.0243 | 2.41  |
| 77 | 18.56 | 20.75 | 31.4 HOXA3_Flexiil    | 99.0 AHELSEACLR                    | Propionamide(C)@8; Label:13C(6)15N(4)(R)@10                                                      |                              | 0.00050882  | 1208.58508 | 403.869  | 1208.58472 | 403.868866 | 3 | 11 | 15.2007 | 2.41  |
| 77 | 18.56 | 20.75 | 31.4 HOXA3_Flexiil    | 99.0 KGMLTSSGGQSPSR                | Label:13C(6)15N(2)(K)@2; Label:13C(6)15N(4)(R)@15                                                | missed K-G@2                 | 0.0116744   | 1466.73816 | 489.92   | 1466.72669 | 489.916168 | 3 | 13 | 13.201  | 2.41  |
| 77 | 18.56 | 20.75 | 31.4 HOXA3_Flexiil    | 99.0 LTHLYPTFLYK                   | Label:13C(6)15N(2)(K)@11                                                                         |                              | -0.00077826 | 1402.77332 | 468.5984 | 1402.77405 | 468.598602 | 3 | 13 | 18.2267 | 2.41  |
| 77 | 18.56 | 20.75 | 31.4 HOXA3_Flexiil    | 99.0 LTHLYPTFLYK                   | Label:13C(6)15N(2)(K)@11                                                                         |                              | 0.0105507   | 1402.78442 | 702.3995 | 1402.77405 | 702.394287 | 2 | 12 | 18.4501 | 2.41  |
| 77 | 18.56 | 20.75 | 31.4 HOXA3_Flexiil    | 99.0 LTHLYPTFLYK                   | Label:13C(6)15N(2)(K)@11                                                                         |                              | -0.00041204 | 1402.77368 | 468.5985 | 1402.77405 | 468.598602 | 3 | 12 | 18.4967 | 2.41  |
| 77 | 18.56 | 20.75 | 31.4 HOXA3_Flexiil    | 99.0 RVEVMALLNLTR                  | Label:13C(6)15N(4)(R)@1; Label:13C(6)15N(4)(R)@13                                                | missed R-V@1                 | 0.00999303  | 1577.85645 | 526.9594 | 1577.84619 | 526.956055 | 3 | 15 | 18.638  | 2.41  |
| 77 | 18.56 | 20.75 | 31.4 HOXA3_Flexiil    | 99.0 TAYTSAQLVELEKEFHNR            | Deamidated(Q)@7; Label:13C(6)15N(2)(K)@13; Label:13C(6)15N(4)(R)@19                              | missed K-E@13                | 0.021638    | 2301.16138 | 1151.588 | 2301.13965 | 1151.57715 | 2 | 20 | 18.6643 | 2.41  |
| 77 | 18.56 | 20.75 | 31.4 HOXA3_Flexiil    | 99.0 TAYTSAQLVELEKEFHNR            | Label:13C(6)15N(2)(K)@13; Label:13C(6)15N(4)(R)@19                                               | missed K-E@13                | 0.00278933  | 2300.15845 | 576.0469 | 2300.15552 | 576.046204 | 4 | 14 | 18.7094 | 2.41  |
| 77 | 18.56 | 20.75 | 31.4 HOXA3_Flexiil    | 99.0 TAYTSAQLVELEKEFHNR            | Deamidated(Q)@7; Label:13C(6)15N(2)(K)@13; Label:13C(6)15N(4)(R)@19                              | missed K-E@13                | 0.0258689   | 2301.16528 | 1151.59  | 2301.13965 | 1151.57715 | 2 | 17 | 17.5456 | 2.41  |
| 77 | 18.56 | 20.75 | 31.4 HOXA3_Flexiil    | 99.0 TAYTSAQLVELEKEFHNR            | Label:13C(6)15N(2)(K)@13; Label:13C(6)15N(4)(R)@19                                               | missed K-E@13                | -0.0101362  | 2300.14526 | 1151.08  | 2300.15552 | 1151.08508 | 2 | 25 | 18.7952 | 2.41  |
| 77 | 18.56 | 20.75 | 31.4 HOXA3_Flexiil    | 99.0 TAYTSAQLVELEKEFHNR            | Label:13C(6)15N(2)(K)@13; Label:13C(6)15N(4)(R)@19                                               | missed K-E@13                | 0.0097099   | 2300.16553 | 767.7291 | 2300.15552 | 767.72583  | 3 | 12 | 18.8758 | 2.41  |
| 77 | 18.56 | 20.75 | 31.4 HOXA3_Flexiil    | 99.0 TAYTSAQLVELEKEFHNR            | Deamidated(Q)@7; Label:13C(6)15N(2)(K)@13; Label:13C(6)15N(4)(R)@19                              | missed K-E@13                | 0.0302665   | 2301.16968 | 576.2997 | 2301.13965 | 576.292175 | 4 | 12 | 18.5854 | 2.41  |
| 77 | 18.56 | 20.75 | 31.4 HOXA3_Flexiil    | 99.0 TAYTSAQLVELEKEFHNR            | Label:13C(6)15N(2)(K)@13; Label:13C(6)15N(4)(R)@19                                               | missed K-E@13                | 0.0142852   | 2300.16968 | 576.0497 | 2300.15552 | 576.046204 | 4 | 11 | 18.8472 | 2.41  |
| 77 | 18.56 | 20.75 | 31.4 HOXA3_Flexiil    | 99.0 YPTFLYK                       | Label:13C(6)15N(2)(K)@7                                                                          | cleaved L-Y@                 |             |            |          |            |            |   |    |         |       |

|    |       |       |      |              |      |                               |                                                                      |                    |             |            |            |            |            |        |       |         |       |
|----|-------|-------|------|--------------|------|-------------------------------|----------------------------------------------------------------------|--------------------|-------------|------------|------------|------------|------------|--------|-------|---------|-------|
| 79 | 18.05 | 20.06 | 32.5 | ETV5_FlexII  | 99.0 | VKQPTMYR                      | Label:13C(6)15N(2)(K)@2; Label:13C(6)15N(4)(R)@9                     | missed K-Q@2       | 0.00091056  | 1168.60388 | 585.3092   | 1168.60291 | 585.308777 | 2      | 11    | 13.9828 | 1.82  |
| 79 | 18.05 | 20.06 | 32.5 | ETV5_FlexII  | 99.0 | ELHSPSELSSCSHEQALGANYGEK      | Propionamide(C)@12; Deamidated(Q)@16; Label:13C(6)15N(2)(K)@25       |                    | 0.0370909   | 2739.2544  | 914.0921   | 2739.21729 | 914.079712 | 3      | 12    | 15.6716 | 1.82  |
| 79 | 18.05 | 20.06 | 32.5 | ETV5_FlexII  | 99.0 | MMPENQYPSEQR                  | Label:13C(6)15N(4)(R)@12                                             |                    | 0.00103726  | 1518.64807 | 760.3313   | 1518.6471  | 760.330811 | 2      | 10    | 15.2612 | 1.82  |
| 79 | 18.05 | 20.06 | 32.5 | ETV5_FlexII  | 99.0 | YPTFLYK                       | Label:13C(6)15N(2)(K)@7                                              | cleaved Y-Y@N-term | -0.00165037 | 938.497681 | 470.2561   | 938.499329 | 470.256928 | 2      | 9     | 18.0092 | 1.82  |
| 79 | 18.05 | 20.06 | 32.5 | ETV5_FlexII  | 99.0 | YPTFLYK                       | Label:13C(6)15N(2)(K)@7                                              | cleaved Y-Y@N-term | 0.00020099  | 938.499451 | 470.257    | 938.499329 | 470.256928 | 2      | 9     | 17.9008 | 1.82  |
| 79 | 18.05 | 20.06 | 32.5 | ETV5_FlexII  | 99.0 | YPTFLYK                       | Label:13C(6)15N(2)(K)@7                                              | cleaved Y-Y@N-term | -0.00091407 | 938.498474 | 470.2565   | 938.499329 | 470.256928 | 2      | 9     | 17.7612 | 1.82  |
| 80 | 18    | 20    | 26.9 | PSEN1_FlexII | 99.0 | AAVQELSSSILAGEDPEER           | Label:13C(6)15N(4)(R)@19                                             |                    | -0.014342   | 2009.9635  | 1005.989   | 2009.97815 | 1005.99634 | 2      | 23    | 18.1033 | 27.70 |
| 80 | 18    | 20    | 26.9 | PSEN1_FlexII | 99.0 | DGQLIYTPFTEDTETVGQR           | Label:13C(6)15N(4)(R)@19                                             |                    | -0.00583185 | 2179.02539 | 1090.52    | 2179.03076 | 1090.52271 | 2      | 21    | 18.6189 | 27.70 |
| 80 | 18    | 20    | 26.9 | PSEN1_FlexII | 99.0 | ESQDVAENDDGGFSEWEAQR          | Label:13C(6)15N(4)(R)@22                                             |                    | -0.00771562 | 2508.01123 | 1255.013   | 2508.0188  | 1255.01672 | 2      | 25    | 17.3964 | 27.70 |
| 80 | 18    | 20    | 26.9 | PSEN1_FlexII | 99.0 | KDGLIYTPFTEDTETVGQR           | Label:13C(6)15N(2)(K)@1; Label:13C(6)15N(4)(R)@20                    | missed K-D@1       | -0.00241602 | 2315.13745 | 772.7198   | 2315.14014 | 772.720642 | 3      | 21    | 17.8679 | 27.70 |
| 80 | 18    | 20    | 26.9 | PSEN1_FlexII | 99.0 | LGLGDFIFYSVLVGK               | Label:13C(6)15N(2)(K)@15                                             |                    | 0.00886552  | 1634.92505 | 818.4698   | 1634.91638 | 818.465454 | 2      | 21    | 20.5748 | 27.70 |
| 80 | 18    | 20    | 26.9 | PSEN1_FlexII | 99.0 | MLVETAQR                      | Label:13C(6)15N(4)(R)@9                                              |                    | 0.00378693  | 1085.54529 | 543.7799   | 1085.5415  | 543.778015 | 2      | 12    | 15.2493 | 27.70 |
| 80 | 18    | 20    | 26.9 | PSEN1_FlexII | 99.0 | QVVEQDEEEDELTLK               | Gln->pyro-Glu@N-term; Label:13C(6)15N(2)(K)@16                       |                    | -0.0083785  | 1922.86401 | 962.4393   | 1922.87244 | 962.443481 | 2      | 19    | 17.8134 | 27.70 |
| 80 | 18    | 20    | 26.9 | PSEN1_FlexII | 99.0 | SLGHPEPLSNGRPQGNRSR           | Deamidated(N)@10; Label:13C(6)15N(4)(R)@12; Label:13C(6)15N(4)(R)@18 |                    | -0.00218461 | 1922.94385 | 962.4792   | 1922.94617 | 962.480347 | 2      | 16    | 14.4272 | 27.70 |
| 80 | 18    | 20    | 26.9 | PSEN1_FlexII | 99.0 | YNAESTERESQDTVAENDDGGFSEWEAQR | Label:13C(6)15N(4)(R)@8; Deamidated(N)@17; Label:13C(6)15N(4)(R)@30  | missed R-E@8       | -0.00622702 | 3469.41528 | 1157.479   | 3469.42041 | 1157.48084 | 3      | 22    | 17.1894 | 27.70 |
| 80 | 18    | 20    | 26.9 | PSEN1_FlexII | 99.0 | AAVQELSSSILAGEDPEER           | Label:13C(6)15N(4)(R)@19                                             |                    | 0.00048405  | 2009.97852 | 671.0001   | 2009.97815 | 671        | 3      | 19    | 18.1183 | 27.70 |
| 80 | 18    | 20    | 26.9 | PSEN1_FlexII | 99.0 | AAVQELSSSILAGEDPEER           | Label:13C(6)15N(4)(R)@19                                             |                    | -0.00372189 | 2009.97351 | 1005.994   | 2009.97815 | 1005.99634 | 2      | 25    | 18.3645 | 27.70 |
| 80 | 18    | 20    | 26.9 | PSEN1_FlexII | 99.0 | AAVQELSSSILAGEDPEER           | Label:13C(6)15N(4)(R)@19                                             |                    | 0.00048405  | 2009.97852 | 671.0001   | 2009.97815 | 671        | 3      | 21    | 18.3878 | 27.70 |
| 80 | 18    | 20    | 26.9 | PSEN1_FlexII | 99.0 | AAVQELSSSILAGEDPEER           | Label:13C(6)15N(4)(R)@19                                             |                    | -0.014342   | 2009.9635  | 1005.989   | 2009.97815 | 1005.99634 | 2      | 17    | 20.8916 | 27.70 |
| 80 | 18    | 20    | 26.9 | PSEN1_FlexII | 99.0 | AAVQELSSSILAGEDPEER           | Label:13C(6)15N(4)(R)@19                                             |                    | 0.006924    | 2009.98547 | 1006       | 2009.97815 | 1005.99634 | 2      | 24    | 18.1032 | 27.70 |
| 80 | 18    | 20    | 26.9 | PSEN1_FlexII | 99.0 | AAVQELSSSILAGEDPEER           | Label:13C(6)15N(4)(R)@19                                             |                    | -0.00038055 | 2009.97778 | 670.9999   | 2009.97815 | 671        | 3      | 20    | 18.1205 | 27.70 |
| 80 | 18    | 20    | 26.9 | PSEN1_FlexII | 99.0 | AAVQELSSSILAGEDPEER           | Label:13C(6)15N(4)(R)@19                                             |                    | -0.00162092 | 2009.97742 | 1005.996   | 2009.97815 | 1005.99634 | 2      | 22    | 18.3626 | 27.70 |
| 80 | 18    | 20    | 26.9 | PSEN1_FlexII | 99.0 | AAVQELSSSILAGEDPEER           | Label:13C(6)15N(4)(R)@19                                             |                    | -0.014342   | 2009.9635  | 1005.989   | 2009.97815 | 1005.99634 | 2      | 9     | 26.5374 | 27.70 |
| 80 | 18    | 20    | 26.9 | PSEN1_FlexII | 99.0 | DGQLIYTPFTEDTETVGQR           | Deamidated(Q)@3; Label:13C(6)15N(4)(R)@19                            |                    | 0.00844325  | 2180.02344 | 1091.019   | 2180.01489 | 1091.01477 | 2      | 15    | 18.6103 | 27.70 |
| 80 | 18    | 20    | 26.9 | PSEN1_FlexII | 99.0 | DGQLIYTPFTEDTETVGQR           | Deamidated(Q)@3; Label:13C(6)15N(4)(R)@19                            |                    | 0.00318876  | 2180.01807 | 727.68     | 2180.01489 | 727.678894 | 3      | 12    | 18.6685 | 27.70 |
| 80 | 18    | 20    | 26.9 | PSEN1_FlexII | 99.0 | ESQDTVAENDDGGFSEWEAQR         | Deamidated(N)@9; Label:13C(6)15N(4)(R)@22                            |                    | 0.0194963   | 2509.02124 | 1255.518   | 2509.00293 | 1255.50867 | 2      | 22    | 17.201  | 27.70 |
| 80 | 18    | 20    | 26.9 | PSEN1_FlexII | 99.0 | ESQDTVAENDDGGFSEWEAQR         | Label:13C(6)15N(4)(R)@22                                             |                    | -0.00564592 | 2508.01343 | 837.0117   | 2508.0188  | 837.01355  | 3      | 20    | 17.2706 | 27.70 |
| 80 | 18    | 20    | 26.9 | PSEN1_FlexII | 99.0 | ESQDTVAENDDGGFSEWEAQR         | Label:13C(6)15N(4)(R)@22                                             |                    | -0.011198   | 2508.00757 | 837.0098   | 2508.0188  | 837.01355  | 3      | 17    | 17.2902 | 27.70 |
| 80 | 18    | 20    | 26.9 | PSEN1_FlexII | 99.0 | KDGLIYTPFTEDTETVGQR           | Label:13C(6)15N(2)(K)@1; Label:13C(6)15N(4)(R)@20                    | missed K-D@1       | 0.00277744  | 2315.14331 | 1158.579   | 2315.14014 | 1158.57727 | 2      | 22    | 17.926  | 27.70 |
| 80 | 18    | 20    | 26.9 | PSEN1_FlexII | 99.0 | KDGLIYTPFTEDTETVGQR           | Label:13C(6)15N(2)(K)@1; Deamidated(Q)@4; Label:13C(6)15N(4)(R)@20   | missed K-D@1       | 0.00358516  | 2316.12769 | 773.0498   | 2316.12402 | 773.048645 | 3      | 11    | 17.908  | 27.70 |
| 80 | 18    | 20    | 26.9 | PSEN1_FlexII | 99.0 | LGLGDFIFYSVLVGK               | Label:13C(6)15N(2)(K)@15                                             |                    | -0.00226574 | 1634.91406 | 818.4643   | 1634.91638 | 818.465454 | 2      | 23    | 20.5673 | 27.70 |
| 80 | 18    | 20    | 26.9 | PSEN1_FlexII | 99.0 | MLVETAQR                      | Label:13C(6)15N(4)(R)@9                                              |                    | -0.00170623 | 1085.53992 | 543.7772   | 1085.5415  | 543.778015 | 2      | 11    | 14.9914 | 27.70 |
| 80 | 18    | 20    | 26.9 | PSEN1_FlexII | 99.0 | MLVETAQR                      | Oxidation(M)@1; Label:13C(6)15N(4)(R)@9                              |                    | 0.0100945   | 1101.54651 | 551.7805   | 1101.53638 | 551.775452 | 2      | 12    | 14.1668 | 27.70 |
| 80 | 18    | 20    | 26.9 | PSEN1_FlexII | 99.0 | MLVETAQR                      | Label:13C(6)15N(4)(R)@9                                              |                    | -0.00064477 | 1085.54089 | 543.7777   | 1085.5415  | 543.778015 | 2      | 11    | 15.239  | 27.70 |
| 80 | 18    | 20    | 26.9 | PSEN1_FlexII | 99.0 | MLVETAQR                      | Label:13C(6)15N(4)(R)@9                                              |                    | -0.0017434  | 1085.53992 | 543.7772   | 1085.5415  | 543.778015 | 2      | 11    | 14.9715 | 27.70 |
| 80 | 18    | 20    | 26.9 | PSEN1_FlexII | 99.0 | MLVETAQR                      | Label:13C(6)15N(4)(R)@9                                              |                    | 0.00041694  | 1085.54187 | 543.7782   | 1085.5415  | 543.778015 | 2      | 11    | 15.2767 | 27.70 |
| 80 | 18    | 20    | 26.9 | PSEN1_FlexII | 99.0 | MLVETAQR                      | 4.79E-05                                                             | 1075.53333         | 538.7739    | 1075.5332  | 538.773865 | 2          | 11         | 15.093 | 27.70 |         |       |
| 80 | 18    | 20    | 26.9 | PSEN1_FlexII | 99.0 | MLVETAQR                      | Label:13C(6)15N(4)(R)@9                                              |                    | 0.0013935   | 1085.54285 | 543.7787   | 1085.5415  | 543.778015 | 2      | 11    | 15.0017 | 27.70 |
| 80 | 18    | 20    | 26.9 | PSEN1_FlexII | 99.0 | MLVETAQR                      | Deamidated(Q)@7; Label:13C(6)15N(4)(R)@9                             |                    | -0.00398723 | 1086.52148 | 544.268    | 1086.52551 | 544.27002  | 2      | 11    | 15.4285 | 27.70 |
| 80 | 18    | 20    | 26.9 | PSEN1_FlexII | 99.0 | MLVETAQR                      | Label:13C(6)15N(4)(R)@9                                              |                    | 0.0050556   | 1085.54651 | 543.7805   | 1085.5415  | 543.778015 | 2      | 10    | 15.5408 | 27.70 |
| 80 | 18    | 20    | 26.9 | PSEN1_FlexII | 99.0 | QVVEQDEEEDELTLK               | Label:13C(6)15N(2)(K)@16                                             |                    | 0.00506197  | 1939.90405 | 970.9593   | 1939.89893 | 970.956787 | 2      | 17    | 16.8653 | 27.70 |
| 80 | 18    | 20    | 26.9 | PSEN1_FlexII | 99.0 | QVVEQDEEEDELTLK               | Label:13C(6)15N(2)(K)@16                                             |                    | -0.0149575  | 1939.88403 | 970.9493   | 1939.89893 | 970.956787 | 2      | 18    | 16.9824 | 27.70 |
| 80 | 18    | 20    | 26.9 | PSEN1_FlexII | 99.0 | QVVEQDEEEDELTLK               | Gln->pyro-Glu@N-term; Label:13C(6)15N(2)(K)@16                       |                    | -0.0083785  | 1922.86401 | 962.4393   | 1922.87244 | 962.443481 | 2      | 14    | 26.4193 | 27.70 |
| 80 | 18    | 20    | 26.9 | PSEN1_FlexII | 99.0 | QVVEQDEEEDELTLK               | Deamidated(Q)@1; Label:13C(6)15N(2)(K)@16                            |                    | 0.022102    | 1940.90503 | 971.4598   | 1940.88294 | 971.448792 | 2      | 15    | 16.6815 | 27.70 |
| 80 | 18    | 20    | 26.9 | PSEN1_FlexII | 99.0 | QVVEQDEEEDELTLK               | Gln->pyro-Glu@N-term; Label:13C(6)15N(2)(K)@16                       |                    | -0.00736903 | 1922.86511 | 962.4398   | 1922.87244 | 962.443481 | 2      | 18    | 17.8238 | 27.70 |
| 80 | 18    | 20    | 26.9 | PSEN1_FlexII | 99.0 | QVVEQDEEEDELTLK               | Gln->pyro-Glu@N-term; Label:13C(6)15N(2)(K)@16                       |                    | -0.00736903 | 1922.86511 | 962.4398   | 1922.87244 | 962.443481 | 2      | 12    | 26.3958 | 27.70 |
| 80 | 18    | 20    | 26.9 | PSEN1_FlexII | 99.0 | SLGHPEPLSNGRPQGNRSR           | Deamidated(N)@10; Label:13C(6)15N(4)(R)@12; Label:13C(6)15N(4)(R)@18 |                    | -0.00117493 | 1922.94507 | 962.4798   | 1922.94617 | 962.480347 | 2      | 16    | 14.2844 | 27.70 |
| 80 | 18    | 20    | 26.9 | PSEN1_FlexII | 99.0 | SLGHPEPLSNGRPQGNRSR           | Deamidated(N)@10; Label:13C(6)15N(4)(R)@12; Label:13C(6)15N(4)(R)@18 |                    | 0.00263167  | 1922.94873 | 641.9902   | 1922.94617 | 641.989319 | 3      | 13    | 14.3328 | 27.70 |
| 80 | 18    | 20    | 26.9 | PSEN1_FlexII | 99.0 | SLGHPEPLSNGRPQGNRSR           | Deamidated(N)@10; Label:13C(6)15N(4)(R)@12; Label:13C(6)15N(4)(R)@18 |                    | 0.00153028  | 1922.948   | 641.9899   | 1922.94617 | 641.989319 | 3      | 11    | 14.3389 | 27.70 |
| 80 | 18    | 20    | 26.9 | PSEN1_FlexII | 99.0 | YPTFLYK                       | Label:13C(6)15N(2)(K)@7                                              | cleaved I-Y@N-term | -0.00165037 | 938.497681 | 470.2561   | 938.499329 | 470.256928 | 2      | 9     | 18.0092 | 27.70 |
| 80 | 18    | 20    | 26.9 | PSEN1_FlexII | 99.0 | YPTFLYK                       | Label:13C(6)15N(2)(K)@7                                              | cleaved I-Y@N-term | 0.00020099  | 938.499451 | 470.257    | 938.499329 | 470.256928 | 2      | 9     | 17.9008 | 27.70 |
| 80 | 18    | 20    | 26.9 | PSEN1_FlexII | 99.0 | YPTFLYK                       | Label:13C(6)15N(2)(K)@7                                              | cleaved Y-Y@N-term | -0.00091407 | 938.498474 | 470.2565   | 938.499329 | 470.256928 | 2      | 9     | 17.7612 | 27.70 |
| 81 | 17.8  | 20.23 | 78.7 | CREB1_FlexII | 99.0 | ILNDLSSDAPGVPR                | Label:13C(6)15N(4)(R)@14                                             |                    | -0.016659   | 1462.74878 | 488.5902   | 1462.7655  | 488.595795 | 3      | 16    | 17.223  | 9.31  |
| 81 | 17.8  | 20.23 | 78.7 | CREB1_FlexII | 99.0 | KILNDLSSDAPGVPR               | Label:13C(6)15N(2)(K)@1; Label:13C(6)15N(4)(R)@15                    | missed K-I@1       | -0.00582022 | 1598.8689  | 800.4417   | 1598.87463 | 800.444641 | 2      | 20    | 16.6377 | 9.31  |
| 81 | 17.8  | 20.23 | 78.7 | CREB1_FlexII | 99.0 | LFSGTQISTIAESEDQSQSVDSVDSQK   | Deamidated(Q)@17; Label:13C(6)15N(2)(K)@28                           |                    | 0.0147524   | 2996.38599 | 999.8026   | 2996.37134 | 999.79773  | 3      | 19    | 18.1214 | 9.31  |
| 81 | 17.8  | 20.23 | 78.7 | CREB1_FlexII | 99.0 | RLFSGTQISTIAESEDQSQSVDSVDSQK  | Label:13C(6)15N(4)(R)@1; Deamidated(Q)@18; Label:13C(6)15N(2)(K)@29  | missed R-L@1       | 0.0163251   | 3162.49707 | 1055.173   | 3162.48071 | 1055.16748 | 3      | 18    | 17.7737 | 9.31  |
| 81 | 17.8  | 20.23 | 78.7 | CREB1_FlexII | 99.0 | TAPTSTIAPGVMASSPALTPQAEAAAR   | Label:13C(6)15N(4)(R)@29                                             |                    | 0.00347444  | 2830.44458 | 944.4888   | 2830.44092 | 944.48761  | 3      | 22    | 18.242  | 9.31  |
| 81 | 17.8  | 20.23 | 78.7 | CREB1_FlexII | 99.0 | TLIEELK                       | Label:13C(6)15N(2)(K)@7                                              |                    | -0.00186555 | 852.502869 | 427.2587   | 852.504761 | 427.258674 | 2      | 9     | 17.5384 | 9.31  |
| 81 | 17.8  | 20.23 | 78.7 | CREB1_FlexII | 99.0 | VAVLENQNK                     | Label:13C(6                                                          |                    |             |            |            |            |            |        |       |         |       |

|    |       |       |                     |                                         |                                                                                                                        |                                  |             |             |          |            |            |   |    |         |      |
|----|-------|-------|---------------------|-----------------------------------------|------------------------------------------------------------------------------------------------------------------------|----------------------------------|-------------|-------------|----------|------------|------------|---|----|---------|------|
| 81 | 17.8  | 20.23 | 78.7 CREB1_FlexIII  | 99.0 KILNDLSSDAPGVPR                    | Label: 13C(6)15N(2)(K)@1; Label: 13C(6)15N(4)(R)@15                                                                    | missed K-I@1                     | -0.00045309 | 1598.87402  | 533.9653 | 1598.87463 | 533.965515 | 3 | 14 | 16.9075 | 9.31 |
| 81 | 17.8  | 20.23 | 78.7 CREB1_FlexIII  | 99.0 TAPTSTIAPGVVMASSPALPTQPAEEAAR      | Label: 13C(6)15N(4)(R)@29                                                                                              |                                  | 0.0136103   | 2830.45532  | 1416.235 | 2830.44092 | 1416.22778 | 2 | 27 | 18.481  | 9.31 |
| 81 | 17.8  | 20.23 | 78.7 CREB1_FlexIII  | 99.0 TAPTSTIAPGVVMASSPALPTQPAEEAAR      | Label: 13C(6)15N(4)(R)@29                                                                                              |                                  | 0.0142777   | 2830.45532  | 944.4924 | 2830.44092 | 944.48761  | 3 | 18 | 18.5169 | 9.31 |
| 81 | 17.8  | 20.23 | 78.7 CREB1_FlexIII  | 99.0 TAPTSTIAPGVVMASSPALPTQPAEEAAR      | Label: 13C(6)15N(4)(R)@29                                                                                              |                                  | 0.0142777   | 2830.45532  | 944.4924 | 2830.44092 | 944.48761  | 3 | 14 | 21.0868 | 9.31 |
| 81 | 17.8  | 20.23 | 78.7 CREB1_FlexIII  | 99.0 TAPTSTIAPGVVMASSPALPTQPAEEAAR      | Deamidated(Q)@22; Label: 13C(6)15N(4)(R)@29                                                                            |                                  | 0.0295995   | 2831.45532  | 1416.735 | 2831.42505 | 1416.71985 | 2 | 15 | 18.222  | 9.31 |
| 81 | 17.8  | 20.23 | 78.7 CREB1_FlexIII  | 99.0 TAPTSTIAPGVVMASSPALPTQPAEEAAR      | Label: 13C(6)15N(4)(R)@29                                                                                              |                                  | 0.0142777   | 2830.45532  | 944.4924 | 2830.44092 | 944.48761  | 3 | 13 | 20.8337 | 9.31 |
| 81 | 17.8  | 20.23 | 78.7 CREB1_FlexIII  | 99.0 TAPTSTIAPGVVMASSPALPTQPAEEAAR      | Label: 13C(6)15N(4)(R)@29                                                                                              |                                  | 0.0142777   | 2830.45532  | 944.4924 | 2830.44092 | 944.48761  | 3 | 10 | 21.4391 | 9.31 |
| 81 | 17.8  | 20.23 | 78.7 CREB1_FlexIII  | 99.0 TAPTSTIAPGVVMASSPALPTQPAEEAAR      | Deamidated(Q)@22; Label: 13C(6)15N(4)(R)@29                                                                            |                                  | 0.0203181   | 2831.44531  | 944.8224 | 2831.42505 | 944.815613 | 3 | 12 | 18.5102 | 9.31 |
| 81 | 17.8  | 20.23 | 78.7 CREB1_FlexIII  | 99.0 TLIEELK                            | Label: 13C(6)15N(2)(K)@7                                                                                               |                                  | 0.00057587  | 852.505249  | 427.2599 | 852.504761 | 427.259674 | 2 | 9  | 17.2721 | 9.31 |
| 81 | 17.8  | 20.23 | 78.7 CREB1_FlexIII  | 99.0 VAVLENQNK                          | Label: 13C(6)15N(2)(K)@9                                                                                               |                                  | 0.00139698  | 1021.5661   | 511.7903 | 1021.56476 | 511.789642 | 2 | 10 | 14.6807 | 9.31 |
| 81 | 17.8  | 20.23 | 78.7 CREB1_FlexIII  | 99.0 VAVLENQNK                          |                                                                                                                        |                                  | -0.00446145 | 1013.54608  | 507.7803 | 1013.55054 | 507.782562 | 2 | 10 | 14.4705 | 9.31 |
| 81 | 17.8  | 20.23 | 78.7 CREB1_FlexIII  | 99.0 YPTFLYK                            | Label: 13C(6)15N(2)(K)@7                                                                                               | cleaved D-Y@N-term               | -0.00165037 | 938.497681  | 470.2561 | 938.499329 | 470.256928 | 2 | 9  | 18.0092 | 9.31 |
| 81 | 17.8  | 20.23 | 78.7 CREB1_FlexIII  | 99.0 YPTFLYK                            | Label: 13C(6)15N(2)(K)@7                                                                                               | cleaved D-Y@N-term               | 0.00020099  | 938.499451  | 470.257  | 938.499329 | 470.256928 | 2 | 9  | 17.9008 | 9.31 |
| 81 | 17.8  | 20.23 | 78.7 CREB1_FlexIII  | 99.0 YPTFLYK                            | Label: 13C(6)15N(2)(K)@7                                                                                               | cleaved D-Y@N-term               | -0.00091407 | 938.498474  | 470.2565 | 938.499329 | 470.256928 | 2 | 9  | 17.7612 | 9.31 |
| 90 | 12.01 | 18.01 | 33.3 SRGAP3_FlexIII | 99.0 ARNDYLLNLAATNAISK                  | Label: 13C(6)15N(4)(R)@2; Label: 13C(6)15N(2)(K)@18                                                                    | missed R-N@2                     | -0.0196337  | 1936.02991  | 646.3506 | 1936.04968 | 646.357178 | 3 | 19 | 18.2418 | 0.68 |
| 90 | 12.01 | 18.01 | 33.3 SRGAP3_FlexIII | 99.0 FEFOPHMGDEVCQVSAQPVQTELLMR         | Propionamide(C)@12; Deamidated(Q)@17; Label: 13C(6)15N(4)(R)@27                                                        |                                  | 0.0271197   | 3228.51831  | 1077.118 | 3228.4917  | 1077.11714 | 3 | 20 | 18.698  | 0.68 |
| 90 | 12.01 | 18.01 | 33.3 SRGAP3_FlexIII | 99.0 HEGLDVIENAVDNLDSR                  | Label: 13C(6)15N(4)(R)@17                                                                                              |                                  | -0.00422593 | 1904.90613  | 953.4603 | 1904.9104  | 953.462463 | 2 | 25 | 18.9211 | 0.68 |
| 90 | 12.01 | 18.01 | 33.3 SRGAP3_FlexIII | 99.0 NDYLLNLAATNAISK                    | Label: 13C(6)15N(2)(K)@16                                                                                              |                                  | 0.00315327  | 1698.90625  | 850.4604 | 1698.9032  | 850.458862 | 2 | 17 | 18.8943 | 0.68 |
| 90 | 12.01 | 18.01 | 33.3 SRGAP3_FlexIII | 99.0 SGDSLMMNLR                         | Label: 13C(6)15N(4)(R)@10                                                                                              |                                  | -0.00062063 | 1114.56751  | 558.291  | 1114.56799 | 558.29126  | 2 | 13 | 18.0851 | 0.68 |
| 90 | 12.01 | 18.01 | 33.3 SRGAP3_FlexIII | 99.0 TYLSAEYNLETSRHEGLDVIENAVDNLDSR     | Label: 13C(6)15N(4)(R)@13; Label: 13C(6)15N(4)(R)@30                                                                   | missed R-H@13                    | -0.0105287  | 3442.62842  | 1148.55  | 3442.63916 | 1148.55371 | 3 | 14 | 19.7138 | 0.68 |
| 90 | 12.01 | 18.01 | 33.3 SRGAP3_FlexIII | 99.0 ARNDYLLNLAATNAISK                  | Label: 13C(6)15N(4)(R)@2; Deamidated(N)@13; Label: 13C(6)15N(2)(K)@18                                                  | missed R-N@2                     | 0.0123981   | 1937.04602  | 969.5303 | 1937.03369 | 969.524109 | 2 | 13 | 18.2903 | 0.68 |
| 90 | 12.01 | 18.01 | 33.3 SRGAP3_FlexIII | 99.0 HEGLDVIENAVDNLDSR                  | Label: 13C(6)15N(4)(R)@17                                                                                              |                                  | -0.00159765 | 1904.90894  | 635.9769 | 1904.9104  | 635.977417 | 3 | 18 | 18.8855 | 0.68 |
| 90 | 12.01 | 18.01 | 33.3 SRGAP3_FlexIII | 99.0 RLYPTFLYK                          | Label: 13C(6)15N(4)(R)@1; Label: 13C(6)15N(2)(K)@9                                                                     | cleaved P-R@N-term; missed R-L@1 | -0.00034113 | 1217.689251 | 609.8535 | 1217.69275 | 609.853638 | 2 | 12 | 17.9401 | 0.68 |
| 90 | 12.01 | 18.01 | 33.3 SRGAP3_FlexIII | 99.0 RLYPTFLYK                          | Label: 13C(6)15N(4)(R)@1; Label: 13C(6)15N(2)(K)@9                                                                     | cleaved P-R@N-term; missed R-L@1 | -0.00693311 | 1217.68891  | 609.8502 | 1217.69275 | 609.853638 | 2 | 11 | 17.6713 | 0.68 |
| 90 | 12.01 | 18.01 | 33.3 SRGAP3_FlexIII | 99.0 TYLSAEYNLETSR                      | Label: 13C(6)15N(4)(R)@13                                                                                              |                                  | 0.00669957  | 1555.74609  | 778.8803 | 1555.73938 | 778.876953 | 2 | 17 | 17.1813 | 0.68 |
| 90 | 12.01 | 18.01 | 33.3 SRGAP3_FlexIII | 99.0 TYLSAEYNLETSRHEGLDVIENAVDNLDSR     | Deamidated(N)@8; Label: 13C(6)15N(4)(R)@13; Label: 13C(6)15N(4)(R)@30                                                  | missed R-H@13                    | -0.00467716 | 3443.61816  | 1148.88  | 3443.62329 | 1148.88171 | 3 | 14 | 19.5947 | 0.68 |
| 90 | 12.01 | 18.01 | 33.3 SRGAP3_FlexIII | 99.0 YPTFLYK                            | Label: 13C(6)15N(2)(K)@7                                                                                               | cleaved L-Y@N-term               | -0.00165037 | 938.497681  | 470.2561 | 938.499329 | 470.256928 | 2 | 9  | 18.0092 | 0.68 |
| 90 | 12.01 | 18.01 | 33.3 SRGAP3_FlexIII | 99.0 YPTFLYK                            | Label: 13C(6)15N(2)(K)@7                                                                                               | cleaved L-Y@N-term               | 0.00020099  | 938.499451  | 470.257  | 938.499329 | 470.256928 | 2 | 9  | 17.9008 | 0.68 |
| 90 | 12.01 | 18.01 | 33.3 SRGAP3_FlexIII | 99.0 YPTFLYK                            | Label: 13C(6)15N(2)(K)@7                                                                                               | cleaved L-Y@N-term               | -0.00091407 | 938.498474  | 470.2565 | 938.499329 | 470.256928 | 2 | 9  | 17.7612 | 0.68 |
| 91 | 12    | 20.75 | 41.1 HOXD3_FlexIII  | 99.0 AAYYENPGFLGGYGYSK                  | Deamidated(N)@6; Label: 13C(6)15N(2)(K)@17                                                                             |                                  | 0.0251357   | 1864.86511  | 933.4398 | 1864.83997 | 933.427246 | 2 | 14 | 18.3002 | 4.09 |
| 91 | 12    | 20.75 | 41.1 HOXD3_FlexIII  | 99.0 GILHSPASQSPER                      | Label: 13C(6)15N(4)(R)@13                                                                                              |                                  | -0.00021296 | 1387.70825  | 463.5767 | 1387.70837 | 463.576721 | 3 | 13 | 14.6815 | 4.09 |
| 91 | 12    | 20.75 | 41.1 HOXD3_FlexIII  | 99.0 NSCATAGESCEDKSPPGPASK              | Propionamide(C)@3; Propionamide(C)@10; Label: 13C(6)15N(2)(K)@13; Label: 13C(6)15N(2)(K)@21                            | missed K-S@13                    | -0.00247041 | 2192.96265  | 731.9948 | 2192.96484 | 731.995544 | 3 | 16 | 13.7507 | 4.09 |
| 91 | 12    | 20.75 | 41.1 HOXD3_FlexIII  | 99.0 NSCATAGESCEDKSPPGPASKR             | Propionamide(C)@3; Propionamide(C)@10; Label: 13C(6)15N(2)(K)@13; Label: 13C(6)15N(2)(K)@21; Label: 13C(6)15N(4)(R)@22 | missed K-S@13; missed K-R@21     | 0.0143731   | 2359.08862  | 590.7794 | 2359.07422 | 590.775818 | 4 | 11 | 13.24   | 4.09 |
| 91 | 12    | 20.75 | 41.1 HOXD3_FlexIII  | 99.0 SPPLGGAAGHVAYSQGLPPVGLAYDAPSPPAFAK | Label: 13C(6)15N(2)(K)@35                                                                                              |                                  | 0.00286675  | 3364.73633  | 1122.586 | 3364.73634 | 1122.58508 | 3 | 22 | 18.9864 | 4.09 |
| 91 | 12    | 20.75 | 41.1 HOXD3_FlexIII  | 99.0 SQPNMVGAAVYAPLSSCLPQQK             | Propionamide(C)@18; Label: 13C(6)15N(2)(K)@23                                                                          |                                  | -0.0115797  | 2546.2273   | 849.7497 | 2546.23877 | 849.75354  | 3 | 22 | 19.0469 | 4.09 |
| 91 | 12    | 20.75 | 41.1 HOXD3_FlexIII  | 99.0 LTHLYPTFLYK                        | Label: 13C(6)15N(2)(K)@11                                                                                              |                                  | -0.00946883 | 1402.76453  | 702.3895 | 1402.77405 | 702.394287 | 2 | 15 | 18.1859 | 4.09 |
| 91 | 12    | 20.75 | 41.1 HOXD3_FlexIII  | 99.0 LTHLYPTFLYK                        | Label: 13C(6)15N(2)(K)@11                                                                                              |                                  | -0.00077826 | 1402.77332  | 468.5984 | 1402.77405 | 468.598602 | 3 | 13 | 18.2267 | 4.09 |
| 91 | 12    | 20.75 | 41.1 HOXD3_FlexIII  | 99.0 LTHLYPTFLYK                        | Label: 13C(6)15N(2)(K)@11                                                                                              |                                  | 0.0105507   | 1402.78442  | 702.3895 | 1402.77405 | 702.394287 | 2 | 12 | 18.4501 | 4.09 |
| 91 | 12    | 20.75 | 41.1 HOXD3_FlexIII  | 99.0 LTHLYPTFLYK                        | Label: 13C(6)15N(2)(K)@11                                                                                              |                                  | -0.00041204 | 1402.77368  | 468.5985 | 1402.77405 | 468.598602 | 3 | 12 | 18.4967 | 4.09 |
| 91 | 12    | 20.75 | 41.1 HOXD3_FlexIII  | 99.0 NSCATAGESCEDKSPPGPASK              | Propionamide(C)@3; Propionamide(C)@10; Label: 13C(6)15N(2)(K)@13; Label: 13C(6)15N(2)(K)@21                            | missed K-S@13                    | 0.00052726  | 2192.96533  | 1097.49  | 2192.96484 | 1097.48975 | 2 | 24 | 13.5868 | 4.09 |
| 91 | 12    | 20.75 | 41.1 HOXD3_FlexIII  | 99.0 NSCATAGESCEDKSPPGPASK              | Deamidated(N)@1; Propionamide(C)@3; Propionamide(C)@10; Label: 13C(6)15N(2)(K)@13; Label: 13C(6)15N(2)(K)@21           | missed K-S@13                    | 0.0180318   | 2193.96704  | 732.3296 | 2193.94898 | 732.323608 | 3 | 12 | 13.4898 | 4.09 |
| 91 | 12    | 20.75 | 41.1 HOXD3_FlexIII  | 99.0 NSCATAGESCEDKSPPGPASK              | Deamidated(N)@1; Propionamide(C)@3; Propionamide(C)@10; Label: 13C(6)15N(2)(K)@13; Label: 13C(6)15N(2)(K)@21           | missed K-S@13                    | -0.0119976  | 2193.93701  | 732.3196 | 2193.94898 | 732.323608 | 3 | 12 | 14.0249 | 4.09 |
| 91 | 12    | 20.75 | 41.1 HOXD3_FlexIII  | 99.0 RVEMANLLNLTER                      | Label: 13C(6)15N(4)(R)@1; Label: 13C(6)15N(4)(R)@13                                                                    | missed R-V@1                     | 0.00149013  | 1577.84766  | 526.9565 | 1577.84619 | 526.956055 | 3 | 15 | 18.526  | 4.09 |
| 91 | 12    | 20.75 | 41.1 HOXD3_FlexIII  | 99.0 RVEMANLLNLTER                      | Label: 13C(6)15N(4)(R)@1; Label: 13C(6)15N(4)(R)@13                                                                    | missed R-V@1                     | 0.00999303  | 1577.85645  | 526.9594 | 1577.84619 | 526.956055 | 3 | 15 | 18.638  | 4.09 |
| 91 | 12    | 20.75 | 41.1 HOXD3_FlexIII  | 99.0 SPPLGGAAGHVAYSQGLPPVPLAYDAPSPPAFAK | Deamidated(Q)@16; Label: 13C(6)15N(2)(K)@35                                                                            |                                  | 0.0121315   | 3365.72974  | 842.4397 | 3365.71753 | 842.436646 | 4 | 13 | 18.9756 | 4.09 |
| 91 | 12    | 20.75 | 41.1 HOXD3_FlexIII  | 99.0 TAYTSAQLELEKEFHNR                  | Deamidated(Q)@7; Label: 13C(6)15N(2)(K)@13; Label: 13C(6)15N(4)(R)@19                                                  | missed K-E@13                    | 0.0160036   | 2301.15552  | 768.0591 | 2301.13965 | 768.058333 | 3 | 15 | 18.6007 | 4.09 |
| 91 | 12    | 20.75 | 41.1 HOXD3_FlexIII  | 99.0 TAYTSAQLELEKEFHNR                  | Deamidated(Q)@7; Label: 13C(6)15N(2)(K)@13; Label: 13C(6)15N(4)(R)@19                                                  | missed K-E@13                    | 0.021638    | 2301.16138  | 1151.588 | 2301.13965 | 1151.57715 | 2 | 20 | 18.6643 | 4.09 |
| 91 | 12    | 20.75 | 41.1 HOXD3_FlexIII  | 99.0 TAYTSAQLELEKEFHNR                  | Label: 13C(6)15N(2)(K)@13; Label: 13C(6)15N(4)(R)@19                                                                   | missed K-E@13                    | 0.00278933  | 2300.15845  | 576.0469 | 2300.15552 | 576.046204 | 4 | 14 | 18.7094 | 4.09 |
| 91 | 12    | 20.75 | 41.1 HOXD3_FlexIII  | 99.0 TAYTSAQLELEKEFHNR                  | Deamidated(Q)@7; Label: 13C(6)15N(2)(K)@13; Label: 13C(6)15N(4)(R)@19                                                  | missed K-E@13                    | 0.0258689   | 2301.16528  | 1151.59  | 2300.15552 | 1151.57715 | 2 | 17 | 18.7546 | 4.09 |
| 91 | 12    | 20.75 | 41.1 HOXD3_FlexIII  | 99.0 TAYTSAQLELEKEFHNR                  | Label: 13C(6)15N(2)(K)@13; Label: 13C(6)15N(4)(R)@19                                                                   | missed K-E@13                    | -0.0101362  | 2300.14526  | 1151.08  | 2300.15552 | 1151.08508 | 2 | 25 | 18.7952 | 4.09 |
| 91 | 12    | 20.75 | 41.1 HOXD3_FlexIII  | 99.0 TAYTSAQLELEKEFHNR                  | Label: 13C(6)15N(2)(K)@13; Label: 13C(6)15N(4)(R)@19                                                                   | missed K-E@13                    | 0.00997099  | 2300.16553  | 767.7291 | 2300.15552 | 767.72583  | 3 | 12 | 18.8758 | 4.09 |
| 91 | 12    | 20.75 | 41.1 HOXD3_FlexIII  | 99.0 TAYTSAQLELEKEFHNR                  | Deamidated(Q)@7; Label: 13C(6)15N(2)(K)@13; Label: 13C(6)15N(4)(R)@19                                                  | missed K-E@13                    | 0.0302665   | 2301.16968  | 576.2997 | 2301.13965 | 576.292175 | 4 | 12 | 18.5854 | 4.09 |
| 91 | 12    | 20.75 | 41.1 HOXD3_FlexIII  | 99.0 TAYTSAQLELEKEFHNR                  | Label: 13C(6)15N(2)(K)@13; Label: 13C(6)15N(4)(R)@19                                                                   | missed K-E@13                    | 0.0142852   | 2300.16968  | 576.0497 | 2300.15552 | 576.046204 | 4 | 11 | 18.8472 | 4.09 |
| 91 | 12    | 20.75 | 41.1 HOXD3_FlexIII  | 99.0 YPTFLYK                            | Label: 13C(6)15N(2)(K)@7                                                                                               | cleaved L-Y@N-term               | -0.00165037 | 938.497681  | 470.2561 | 938.499329 | 470.256928 | 2 | 9  | 18.0092 | 4.09 |
| 91 | 12    | 20.75 | 41.1 HOXD3_FlexIII  | 99.0 YPTFLYK                            | Label: 13C(6)15N(2)(K)@7                                                                                               | cleaved L-Y@N-term               | 0.00020099  | 938.499451  | 470.257  | 938.499329 | 470.256928 | 2 | 9  | 17.9008 | 4.09 |
| 91 | 12    | 20.75 | 41.1 HOXD3_FlexIII  | 99.0 YPTFLYK                            | Label: 13C(6)15N(2)(K)@7                                                                                               | cleaved L-Y@N-term               | -0.00091407 | 938.498474  | 470.2565 | 938.499329 | 470.256928 | 2 | 9  | 17.7612 | 4.09 |
| 96 | 10    | 12    | 18.9 SLC3A2_FlexIII | 99.0 AFGLVGK                            | Label: 13C(6)15N(2)(K)@7                                                                                               |                                  | 0.00439629  | 698.425049  | 350.2198 | 698.420654 | 350.217621 | 2 | 8  | 16.7254 | 9.75 |
| 96 | 10    | 12    | 18.9 SLC3A2_FlexIII | 99.0 FSISPDEDSSSYSNSDFNYSYPTK           | Label: 13C(6)15N(2)(K)@25                                                                                              |                                  | 0.00592494  |             |          |            |            |   |    |         |      |

|     |       |       |      |                 |      |                       |                                                                                                                |                              |             |            |          |            |            |   |    |         |       |
|-----|-------|-------|------|-----------------|------|-----------------------|----------------------------------------------------------------------------------------------------------------|------------------------------|-------------|------------|----------|------------|------------|---|----|---------|-------|
| 96  | 10    | 12    | 18.9 | SLC38A2_FlexIII | 99.0 | SHYADVDPENQNFLESNLGKK | Deamidated(N) @10; Label:13C(6)15N(2)(K) @21; Label:13C(6)15N(2)(K) @22                                        | missed K-K @21               | 0.0261299   | 2534.2522  | 634.5703 | 2534.22607 | 634.563782 | 4 | 18 | 17.4126 | 9.75  |
| 96  | 10    | 12    | 18.9 | SLC38A2_FlexIII | 99.0 | YPTFLYK               | Label:13C(6)15N(2)(K) @7                                                                                       | cleaved H-Y @N-term          | -0.00165037 | 938.497681 | 470.2561 | 938.499329 | 470.256928 | 2 | 9  | 18.0092 | 9.75  |
| 96  | 10    | 12    | 18.9 | SLC38A2_FlexIII | 99.0 | YPTFLYK               | Label:13C(6)15N(2)(K) @7                                                                                       | cleaved H-Y @N-term          | 0.00020099  | 938.499451 | 470.257  | 938.499329 | 470.256928 | 2 | 9  | 17.9008 | 9.75  |
| 96  | 10    | 12    | 18.9 | SLC38A2_FlexIII | 99.0 | YPTFLYK               | Label:13C(6)15N(2)(K) @7                                                                                       | cleaved H-Y @N-term          | -0.00091407 | 938.498474 | 470.2565 | 938.499329 | 470.256928 | 2 | 9  | 17.7612 | 9.75  |
| 98  | 9.49  | 15.64 | 11.4 | PSEN2_FlexIII   | 99.0 | NEPIFPALYSSAMVWTVGMAK | Deamidated(N) @1; Label:13C(6)15N(2)(K) @22                                                                    |                              | 0.0264513   | 2433.24731 | 1217.631 | 2433.22046 | 1217.61743 | 2 | 16 | 20.6026 | 11.78 |
| 98  | 9.49  | 15.64 | 11.4 | PSEN2_FlexIII   | 99.0 | NGQLIYTPFTEDTPSVGQR   | Label:13C(6)15N(4)(R) @19                                                                                      |                              | 0.00589377  | 2132.04736 | 711.6897 | 2132.04126 | 711.687744 | 3 | 15 | 18.5303 | 11.78 |
| 98  | 9.49  | 15.64 | 11.4 | PSEN2_FlexIII   | 99.0 | QGPDEGENTAQRW         | Gln->pyro-Glu @N-term; Label:13C(6)15N(4)(R) @13                                                               |                              | -0.00043967 | 1479.62512 | 740.8198 | 1479.62537 | 740.820007 | 2 | 14 | 16.3111 | 11.78 |
| 98  | 9.49  | 15.64 | 11.4 | PSEN2_FlexIII   | 99.0 | TSLSAESPTPR           |                                                                                                                |                              | -0.00835609 | 1275.60461 | 638.8096 | 1275.61292 | 638.813721 | 2 | 13 | 15.7695 | 11.78 |
| 98  | 9.49  | 15.64 | 11.4 | PSEN2_FlexIII   | 99.0 | SOENEEDGEEDPDR        | Deamidated(N) @4; Label:13C(6)15N(4)(R) @14                                                                    |                              | 0.0197989   | 1658.62524 | 830.3199 | 1658.60547 | 830.310059 | 2 | 7  | 10.2814 | 11.78 |
| 98  | 9.49  | 15.64 | 11.4 | PSEN2_FlexIII   | 99.0 | LGLGDFIFYSVLVGK       | Label:13C(6)15N(2)(K) @15                                                                                      |                              | 0.00886552  | 1634.92505 | 818.4698 | 1634.91638 | 818.465454 | 2 | 21 | 20.5748 | 11.78 |
| 98  | 9.49  | 15.64 | 11.4 | PSEN2_FlexIII   | 99.0 | LGLGDFIFYSVLVGK       | Label:13C(6)15N(2)(K) @15                                                                                      |                              | -0.00226574 | 1634.91406 | 818.4643 | 1634.91638 | 818.465454 | 2 | 23 | 20.5673 | 11.78 |
| 98  | 9.49  | 15.64 | 11.4 | PSEN2_FlexIII   | 99.0 | MLVETAQR              | Label:13C(6)15N(4)(R) @9                                                                                       |                              | 0.00378693  | 1085.54529 | 543.7799 | 1085.5415  | 543.778015 | 2 | 12 | 15.2493 | 11.78 |
| 98  | 9.49  | 15.64 | 11.4 | PSEN2_FlexIII   | 99.0 | MLVETAQR              | Label:13C(6)15N(4)(R) @9                                                                                       |                              | -0.00170623 | 1085.53992 | 543.7772 | 1085.5415  | 543.778015 | 2 | 11 | 14.9914 | 11.78 |
| 98  | 9.49  | 15.64 | 11.4 | PSEN2_FlexIII   | 99.0 | MLVETAQR              | Oxidation(M) @1; Label:13C(6)15N(4)(R) @9                                                                      |                              | 0.0100945   | 1101.54651 | 551.7805 | 1101.53638 | 551.775452 | 2 | 12 | 14.1668 | 11.78 |
| 98  | 9.49  | 15.64 | 11.4 | PSEN2_FlexIII   | 99.0 | MLVETAQR              | Label:13C(6)15N(4)(R) @9                                                                                       |                              | -0.00064477 | 1085.54089 | 543.7777 | 1085.5415  | 543.778015 | 2 | 11 | 15.239  | 11.78 |
| 98  | 9.49  | 15.64 | 11.4 | PSEN2_FlexIII   | 99.0 | MLVETAQR              | Label:13C(6)15N(4)(R) @9                                                                                       |                              | -0.0017434  | 1085.53992 | 543.7772 | 1085.5415  | 543.778015 | 2 | 11 | 14.9715 | 11.78 |
| 98  | 9.49  | 15.64 | 11.4 | PSEN2_FlexIII   | 99.0 | MLVETAQR              | Label:13C(6)15N(4)(R) @9                                                                                       |                              | 0.00041694  | 1085.54187 | 543.7782 | 1085.5415  | 543.778015 | 2 | 11 | 15.2767 | 11.78 |
| 98  | 9.49  | 15.64 | 11.4 | PSEN2_FlexIII   | 99.0 | MLVETAQR              |                                                                                                                |                              | 4.79E-05    | 1075.53333 | 538.7739 | 1075.5332  | 538.773865 | 2 | 11 | 15.093  | 11.78 |
| 98  | 9.49  | 15.64 | 11.4 | PSEN2_FlexIII   | 99.0 | MLVETAQR              | Label:13C(6)15N(4)(R) @9                                                                                       |                              | 0.0013935   | 1085.54285 | 543.7787 | 1085.5415  | 543.778015 | 2 | 11 | 15.0017 | 11.78 |
| 98  | 9.49  | 15.64 | 11.4 | PSEN2_FlexIII   | 99.0 | MLVETAQR              | Deamidated(Q) @7; Label:13C(6)15N(4)(R) @9                                                                     |                              | -0.00398723 | 1086.52148 | 544.268  | 1086.52551 | 544.27002  | 2 | 11 | 15.4285 | 11.78 |
| 98  | 9.49  | 15.64 | 11.4 | PSEN2_FlexIII   | 99.0 | MLVETAQR              | Label:13C(6)15N(4)(R) @9                                                                                       |                              | 0.0050556   | 1085.54651 | 543.7805 | 1085.5415  | 543.778015 | 2 | 10 | 15.5408 | 11.78 |
| 98  | 9.49  | 15.64 | 11.4 | PSEN2_FlexIII   | 99.0 | NGQLIYTPFTEDTPSVGQR   | Deamidated(Q) @3; Label:13C(6)15N(4)(R) @19                                                                    |                              | 0.0209054   | 2133.04541 | 1067.53  | 2133.02539 | 1067.52002 | 2 | 14 | 18.4866 | 11.78 |
| 98  | 9.49  | 15.64 | 11.4 | PSEN2_FlexIII   | 99.0 | NGQLIYTPFTEDTPSVGQR   | Deamidated(N) @1; Label:13C(6)15N(4)(R) @19                                                                    |                              | 0.00088588  | 2133.02539 | 1067.52  | 2133.02539 | 1067.52002 | 2 | 17 | 18.9166 | 11.78 |
| 98  | 9.49  | 15.64 | 11.4 | PSEN2_FlexIII   | 99.0 | QGPDEGENTAQRW         | Label:13C(6)15N(4)(R) @13                                                                                      |                              | -0.0003441  | 1496.65173 | 749.3331 | 1496.65198 | 749.333252 | 2 | 15 | 15.2432 | 11.78 |
| 98  | 9.49  | 15.64 | 11.4 | PSEN2_FlexIII   | 99.0 | QGPDEGENTAQRW         | Label:13C(6)15N(4)(R) @13                                                                                      |                              | 0.00063246  | 1496.65271 | 749.3336 | 1496.65198 | 749.333252 | 2 | 14 | 15.5182 | 11.78 |
| 98  | 9.49  | 15.64 | 11.4 | PSEN2_FlexIII   | 99.0 | TSLSAESPTPR           | Label:13C(6)15N(4)(R) @12                                                                                      |                              | -0.00061414 | 1285.62073 | 643.8176 | 1285.62122 | 643.817871 | 2 | 13 | 15.6361 | 11.78 |
| 98  | 9.49  | 15.64 | 11.4 | PSEN2_FlexIII   | 99.0 | TSLSAESPTPR           | Oxidation(M) @4; Label:13C(6)15N(4)(R) @12                                                                     |                              | -0.00208924 | 1301.61401 | 651.8143 | 1301.61609 | 651.815308 | 2 | 12 | 14.4397 | 11.78 |
| 98  | 9.49  | 15.64 | 11.4 | PSEN2_FlexIII   | 99.0 | TSLSAESPTPR           | Label:13C(6)15N(4)(R) @12                                                                                      |                              | -0.0015907  | 1285.61963 | 643.8171 | 1285.62122 | 643.817871 | 2 | 12 | 15.9086 | 11.78 |
| 98  | 9.49  | 15.64 | 11.4 | PSEN2_FlexIII   | 99.0 | YPTFLYK               | Label:13C(6)15N(2)(K) @7                                                                                       | cleaved I-Y @N-term          | -0.00165037 | 938.497681 | 470.2561 | 938.499329 | 470.256928 | 2 | 9  | 18.0092 | 11.78 |
| 98  | 9.49  | 15.64 | 11.4 | PSEN2_FlexIII   | 99.0 | YPTFLYK               | Label:13C(6)15N(2)(K) @7                                                                                       | cleaved I-Y @N-term          | 0.00020099  | 938.499451 | 470.257  | 938.499329 | 470.256928 | 2 | 9  | 17.9008 | 11.78 |
| 98  | 9.49  | 15.64 | 11.4 | PSEN2_FlexIII   | 99.0 | YPTFLYK               | Label:13C(6)15N(2)(K) @7                                                                                       | cleaved I-Y @N-term          | -0.00091407 | 938.498474 | 470.2565 | 938.499329 | 470.256928 | 2 | 9  | 17.7612 | 11.78 |
| 101 | 8.41  | 10.48 | 16.5 | MNDA_FlexIII    | 99.0 | GRIPVAQKR             | Label:13C(6)15N(4)(R) @2; Label:13C(6)15N(2)(K) @8; Label:13C(6)15N(4)(R) @9                                   | missed R-I @2; missed K-R @8 | -0.00504941 | 1051.65576 | 351.5592 | 1051.66099 | 351.560913 | 3 | 8  | 9.2081  | 0.64  |
| 101 | 8.41  | 10.48 | 16.5 | MNDA_FlexIII    | 99.0 | NYPNDPQVTVVVLK        | Label:13C(6)15N(2)(K) @14                                                                                      |                              | -0.0048895  | 1528.86572 | 765.4401 | 1528.87048 | 765.442505 | 2 | 14 | 17.8949 | 0.64  |
| 101 | 8.41  | 10.48 | 16.5 | MNDA_FlexIII    | 99.0 | SLLAYDLGLTTK          | Label:13C(6)15N(2)(K) @12                                                                                      |                              | -0.007133   | 1301.7251  | 651.8698 | 1301.73218 | 651.873413 | 2 | 13 | 19.099  | 0.64  |
| 101 | 8.41  | 10.48 | 16.5 | MNDA_FlexIII    | 99.0 | MQEENR                | Label:13C(6)15N(4)(R) @7                                                                                       |                              | -0.00601799 | 978.40448  | 490.2095 | 978.410461 | 490.212494 | 2 | 7  | 12.8126 | 0.64  |
| 101 | 8.41  | 10.48 | 16.5 | MNDA_FlexIII    | 99.0 | YPTFLYK               | Label:13C(6)15N(2)(K) @7                                                                                       | cleaved N-Y @N-term          | -0.00165037 | 938.497681 | 470.2561 | 938.499329 | 470.256928 | 2 | 9  | 18.0092 | 0.64  |
| 101 | 8.41  | 10.48 | 16.5 | MNDA_FlexIII    | 99.0 | YPTFLYK               | Label:13C(6)15N(2)(K) @7                                                                                       | cleaved N-Y @N-term          | 0.00020099  | 938.499451 | 470.257  | 938.499329 | 470.256928 | 2 | 9  | 17.9008 | 0.64  |
| 101 | 8.41  | 10.48 | 16.5 | MNDA_FlexIII    | 99.0 | YPTFLYK               | Label:13C(6)15N(2)(K) @7                                                                                       | cleaved N-Y @N-term          | -0.00091407 | 938.498474 | 470.2565 | 938.499329 | 470.256928 | 2 | 9  | 17.7612 | 0.64  |
| 107 | 7.88  | 9.98  | 22.2 | TSPAN12_FlexIII | 99.0 | NDNSQHLSCPSVELLKPSLSR | Propionamide(C) @9; Label:13C(6)15N(2)(K) @16; Label:13C(6)15N(4)(R) @21                                       |                              | -0.0101861  | 2412.2085  | 805.0768 | 2412.21851 | 805.080139 | 3 | 21 | 17.4058 | 10.06 |
| 107 | 7.88  | 9.98  | 22.2 | TSPAN12_FlexIII | 99.0 | QAHQEDLSLDYQEGCGK     | Gln->pyro-Glu @N-term; Propionamide(C) @15; Label:13C(6)15N(2)(K) @17                                          |                              | 0.0100566   | 1981.86682 | 991.9407 | 1981.85669 | 991.935608 | 2 | 26 | 16.9741 | 10.06 |
| 107 | 7.88  | 9.98  | 22.2 | TSPAN12_FlexIII | 99.0 | QAHQEDLSLDYQEGCGKK    | Gln->pyro-Glu @N-term; Propionamide(C) @15; Label:13C(6)15N(2)(K) @17; Label:13C(6)15N(2)(K) @18               | missed K-K @17               | 0.00110449  | 2117.96729 | 1059.991 | 2117.96582 | 1059.99023 | 2 | 26 | 16.5295 | 10.06 |
| 107 | 7.88  | 9.98  | 22.2 | TSPAN12_FlexIII | 99.0 | MTNLYGLPR             | Label:13C(6)15N(4)(R) @8                                                                                       |                              | -0.00766238 | 960.465088 | 481.2398 | 960.472656 | 481.243591 | 2 | 10 | 16.1748 | 10.06 |
| 107 | 7.88  | 9.98  | 22.2 | TSPAN12_FlexIII | 99.0 | NDNSQHLSCPSVELLKPSLSR | Deamidated(N) @3; Propionamide(C) @9; Label:13C(6)15N(2)(K) @16; Label:13C(6)15N(4)(R) @21                     |                              | 0.00573902  | 2413.2085  | 805.4101 | 2413.20264 | 805.408142 | 3 | 18 | 17.6652 | 10.06 |
| 107 | 7.88  | 9.98  | 22.2 | TSPAN12_FlexIII | 99.0 | NDNSQHLSCPSVELLKPSLSR | Deamidated(N) @3; Propionamide(C) @9; Label:13C(6)15N(2)(K) @16; Label:13C(6)15N(4)(R) @21                     |                              | 0.00647144  | 2413.20898 | 805.4103 | 2413.20264 | 805.408142 | 3 | 15 | 17.1423 | 10.06 |
| 107 | 7.88  | 9.98  | 22.2 | TSPAN12_FlexIII | 99.0 | NDNSQHLSCPSVELLKPSLSR | Deamidated(Q) @5; Propionamide(C) @9; Label:13C(6)15N(2)(K) @16; Label:13C(6)15N(4)(R) @21                     |                              | 0.0248626   | 2413.2273  | 1207.621 | 2413.20264 | 1207.60864 | 2 | 16 | 17.2722 | 10.06 |
| 107 | 7.88  | 9.98  | 22.2 | TSPAN12_FlexIII | 99.0 | NDNSQHLSCPSVELLKPSLSR | Deamidated(N) @3; Propionamide(C) @9; Label:13C(6)15N(2)(K) @16; Label:13C(6)15N(4)(R) @21                     |                              | 0.00822188  | 2413.21094 | 604.31   | 2413.20264 | 604.307922 | 4 | 11 | 17.1861 | 10.06 |
| 107 | 7.88  | 9.98  | 22.2 | TSPAN12_FlexIII | 99.0 | QAHQEDLSLDYQEGCGK     | Propionamide(C) @15; Label:13C(6)15N(2)(K) @17                                                                 |                              | -0.00482505 | 1998.87854 | 667.3001 | 1998.8833  | 667.301697 | 3 | 18 | 16.3262 | 10.06 |
| 107 | 7.88  | 9.98  | 22.2 | TSPAN12_FlexIII | 99.0 | QAHQEDLSLDYQEGCGK     | Propionamide(C) @15; Label:13C(6)15N(2)(K) @17                                                                 |                              | 0.00319015  | 1998.88745 | 1000.451 | 1998.88833 | 1000.44691 | 2 | 21 | 16.3639 | 10.06 |
| 107 | 7.88  | 9.98  | 22.2 | TSPAN12_FlexIII | 99.0 | QAHQEDLSLDYQEGCGK     | Deamidated(Q) @12; Propionamide(C) @15; Label:13C(6)15N(2)(K) @17                                              |                              | 0.00121234  | 1999.86853 | 667.6301 | 1999.86731 | 667.6297   | 3 | 17 | 16.5932 | 10.06 |
| 107 | 7.88  | 9.98  | 22.2 | TSPAN12_FlexIII | 99.0 | QAHQEDLSLDYQEGCGKK    | Gln->pyro-Glu @N-term; Propionamide(C) @15; Label:13C(6)15N(2)(K) @17; Label:13C(6)15N(2)(K) @18               | missed K-K @17               | 0.0128037   | 2117.97876 | 707.0002 | 2117.96582 | 706.995911 | 3 | 21 | 16.4972 | 10.06 |
| 107 | 7.88  | 9.98  | 22.2 | TSPAN12_FlexIII | 99.0 | QAHQEDLSLDYQEGCGKK    | Deamidated(Q) @12; Propionamide(C) @15; Label:13C(6)15N(2)(K) @17; Label:13C(6)15N(2)(K) @18                   | missed K-K @17               | 0.0322993   | 2136.00879 | 713.0102 | 2135.97656 | 712.999451 | 3 | 14 | 16.1204 | 10.06 |
| 107 | 7.88  | 9.98  | 22.2 | TSPAN12_FlexIII | 99.0 | QAHQEDLSLDYQEGCGKK    | Propionamide(C) @15; Label:13C(6)15N(2)(K) @17; Label:13C(6)15N(2)(K) @18                                      | missed K-K @17               | -0.00128455 | 2134.99146 | 534.7551 | 2134.99243 | 534.755371 | 4 | 11 | 15.9102 | 10.06 |
| 107 | 7.88  | 9.98  | 22.2 | TSPAN12_FlexIII | 99.0 | QAHQEDLSLDYQEGCGKK    | Deamidated(Q) @12; Propionamide(C) @15; Label:13C(6)15N(2)(K) @17; Label:13C(6)15N(2)(K) @18                   | missed K-K @17               | 0.0322993   | 2136.00879 | 713.0102 | 2135.97656 | 712.999451 | 3 | 11 | 15.8469 | 10.06 |
| 107 | 7.88  | 9.98  | 22.2 | TSPAN12_FlexIII | 99.0 | YPTFLYK               | Label:13C(6)15N(2)(K) @7                                                                                       | cleaved L-Y @N-term          | -0.00165037 | 938.497681 | 470.2561 | 938.499329 | 470.256928 | 2 | 9  | 18.0092 | 10.06 |
| 107 | 7.88  | 9.98  | 22.2 | TSPAN12_FlexIII | 99.0 | YPTFLYK               | Label:13C(6)15N(2)(K) @7                                                                                       | cleaved L-Y @N-term          | 0.00020099  | 938.499451 | 470.257  | 938.499329 | 470.256928 | 2 | 9  | 17.9008 | 10.06 |
| 107 | 7.88  | 9.98  | 22.2 | TSPAN12_FlexIII | 99.0 | YPTFLYK               | Label:13C(6)15N(2)(K) @7                                                                                       | cleaved L-Y @N-term          | -0.00091407 | 938.498474 | 470.2565 | 938.499329 | 470.256928 | 2 | 9  | 17.7612 | 10.06 |
| 11  | 52.74 | 54.75 | 70.6 | HOXC10_FlexIII  | 99.0 | EENVCCMYSAEKR         | Deamidated(N) @3; Propionamide(C) @5; Propionamide(C) @6; Label:13C(6)15N(2)(K) @12; Label:13C(6)15N(4)(R) @13 |                              | 0.0198487   | 1721.73755 | 574.9198 | 1721.71777 |            |   |    |         |       |

|    |       |       |                        |                                  |                                                                                                 |                             |             |            |          |            |            |   |    |         |       |
|----|-------|-------|------------------------|----------------------------------|-------------------------------------------------------------------------------------------------|-----------------------------|-------------|------------|----------|------------|------------|---|----|---------|-------|
| 37 | 40.52 | 46.67 | 40.3 PRKACB_Flexill    | 98.9 QIEHTLNEK                   | Label:13C(6)15N(2)(K)@9                                                                         |                             | 0.0026821   | 1118.58386 | 560.2992 | 1118.58118 | 560.297852 | 2 | 9  | 12.9266 | 9.90  |
| 5  | 59.76 | 61.76 | 81.6 2-SEP_Flexill     | 98.9 VIPGAALNTRK                 | Label:13C(6)15N(4)(R)@11; Label:13C(6)15N(2)(K)@12                                              | missed R-K@11               | -0.00028304 | 1227.7417  | 614.8781 | 1227.74182 | 614.878174 | 2 | 10 | 15.4903 | NA    |
| 29 | 42.79 | 44.97 | 59.5 PBK_Flexill       | 98.9 SLHHNIVGYR                  | Label:13C(6)15N(4)(R)@11                                                                        |                             | -0.0008231  | 1301.68591 | 434.9026 | 1301.68677 | 434.902893 | 3 | 11 | 14.9277 | 17.23 |
| 38 | 40.23 | 42.26 | 57.4 CDK4_Flexill      | 98.9 VTLVFEHVDDQLR               | Label:13C(6)15N(4)(R)@13                                                                        |                             | 0.015592    | 1579.83875 | 527.6202 | 1579.82336 | 527.615051 | 3 | 8  | 24.1344 | 14.73 |
| 48 | 36.13 | 38.14 | 49.0 TNFRSF10A_Flexill | 98.9 SDEEERSPTCTTR               | Label:13C(6)15N(4)(R)@6; Propionamide(C)@9; Label:13C(6)15N(4)(R)@13                            | missed R-S@6                | 0.00097482  | 1600.69116 | 534.571  | 1600.69019 | 534.570679 | 3 | 9  | 10.3798 | 12.24 |
| 22 | 45.72 | 47.76 | 72.9 BCKDK_Flexill     | 98.9 STSATDTHVHEMAR              | Label:13C(6)15N(4)(R)@14                                                                        |                             | -0.0044282  | 1551.69299 | 388.9305 | 1551.69751 | 388.931671 | 4 | 10 | 12.5817 | 2.26  |
| 46 | 36.36 | 38.64 | 86.3 HOXC11_Flexill    | 98.9 EVSYGLEPSGK                 | Label:13C(6)15N(2)(K)@11                                                                        |                             | -0.00466104 | 1172.57593 | 587.2952 | 1172.58044 | 587.297485 | 2 | 10 | 15.9699 | 3.80  |
| 51 | 32.48 | 34.57 | 50.0 WNT2_Flexill      | 98.9 ALMNLHNNR                   | Deamidated(N)@7; Label:13C(6)15N(4)(R)@9                                                        |                             | 0.00768491  | 1092.54504 | 547.2798 | 1092.53735 | 547.27594  | 2 | 10 | 15.5203 | 11.83 |
| 13 | 50.86 | 52.87 | 65.6 IL16_Flexill      | 98.9 LTAPPSLSCHLSPLCLR           | Propionamide(C)@8; Propionamide(C)@16; Label:13C(6)15N(4)(R)@17                                 |                             | -0.0117982  | 1942.98792 | 648.6699 | 1942.99963 | 648.673828 | 3 | 10 | 26.5861 | 13.95 |
| 13 | 50.86 | 52.87 | 65.6 IL16_Flexill      | 98.9 SAAPTDRQPSYLSNCR            | Label:13C(6)15N(4)(R)@7; Propionamide(C)@13; Label:13C(6)15N(4)(R)@16                           | missed R-Q@7                | 0.00320141  | 1855.87842 | 619.6334 | 1855.8575  | 619.632263 | 3 | 10 | 15.182  | 13.95 |
| 13 | 50.86 | 52.87 | 65.6 IL16_Flexill      | 98.9 SAAPTDRQPSYLSNCRK           | Label:13C(6)15N(4)(R)@7; Propionamide(C)@13; Label:13C(6)15N(4)(R)@16; Label:13C(6)15N(2)(K)@17 | missed R-Q@7; missed R-K@16 | -0.0147374  | 1991.96936 | 498.9996 | 1991.98413 | 499.003326 | 4 | 10 | 14.5861 | 13.95 |
| 31 | 41.62 | 43.81 | 59.6 LIMS1_Flexill     | 98.9 CEKPFLLGHR                  | Propionamide(C)@1; Label:13C(6)15N(2)(K)@3; Label:13C(6)15N(4)(R)@9                             |                             | -0.00128511 | 1174.60242 | 392.5414 | 1174.60364 | 392.541809 | 3 | 9  | 14.3192 | 4.68  |
| 52 | 31.37 | 33.43 | 67.9 MMP28_Flexill     | 98.9 RGEAHFDQDER                 | Label:13C(6)15N(4)(R)@1; Label:13C(6)15N(4)(R)@11                                               | missed R-G@1                | -0.00801413 | 1378.60486 | 690.3097 | 1378.61292 | 690.313721 | 2 | 7  | 10.8985 | 2.09  |
| 35 | 40.71 | 42.76 | 46.9 SP100_Flexill     | 98.9 NLPVPQR                     | Label:13C(6)15N(4)(R)@7                                                                         |                             | -0.00046827 | 834.49469  | 418.2546 | 834.495117 | 418.254822 | 2 | 8  | 15.2804 | 15.89 |
| 49 | 33.63 | 37.69 | 49.1 TDG_Flexill       | 98.9 NMDVQEQYTFDQLAQEDAKK        | Deamidated(Q)@14; Label:13C(6)15N(2)(K)@21; Label:13C(6)15N(2)(K)@22                            | missed K-K@21               | 0.0151427   | 2629.27026 | 877.4307 | 2629.25513 | 877.42572  | 3 | 11 | 20.022  | 7.02  |
| 2  | 66.54 | 68.54 | 65.5 FZR1_Flexill      | 98.9 SSPDGDNDVSPYSLSPVSNK        | Deamidated(N)@7; Label:13C(6)15N(2)(K)@20                                                       |                             | 0.0225532   | 2072.94898 | 691.9903 | 2072.92651 | 691.982788 | 3 | 11 | 16.9143 | 12.66 |
| 29 | 42.79 | 44.97 | 59.5 PBK_Flexill       | 98.9 SLNDLIEER                   | Label:13C(6)15N(4)(R)@9                                                                         |                             | 0.0071549   | 1097.56653 | 549.7905 | 1097.5592  | 549.786865 | 2 | 10 | 20.7767 | 17.23 |
| 45 | 37.2  | 41.27 | 48.7 CDC2L5_Flexill    | 98.9 CVDKFDIGIIGEGTYGQVYK        | Propionamide(C)@1; Label:13C(6)15N(2)(K)@4; Deamidated(Q)@18; Label:13C(6)15N(2)(K)@21          | missed K-F@4                | 0.0120616   | 2405.22778 | 802.7499 | 2405.21606 | 802.745911 | 3 | 11 | 19.6025 | 12.09 |
| 46 | 36.36 | 38.64 | 86.3 HOXC11_Flexill    | 98.9 EVSYGLEPSGK                 | Label:13C(6)15N(2)(K)@11                                                                        |                             | -0.00282998 | 1172.57764 | 587.2961 | 1172.58044 | 587.297485 | 2 | 10 | 15.6938 | 3.80  |
| 31 | 41.62 | 43.81 | 59.6 LIMS1_Flexill     | 98.9 AMNNSWHPCECFR               | Propionamide(C)@10; Label:13C(6)15N(4)(R)@12                                                    |                             | -0.0006919  | 1571.66321 | 524.895  | 1571.6637  | 524.895203 | 3 | 10 | 16.7246 | 4.68  |
| 36 | 40.58 | 42.7  | 45.4 CSNK1D_Flexill    | 98.9 THQHPIYR                    | Label:13C(6)15N(4)(R)@8                                                                         |                             | -0.00264503 | 1060.54138 | 354.5211 | 1060.54419 | 354.522003 | 3 | 8  | 12.247  | 14.60 |
| 68 | 22.06 | 24.16 | 23.2 FSCN3_Flexill     | 98.9 WTLQCLISGR                  | Propionamide(C)@5; Label:13C(6)15N(4)(R)@10                                                     |                             | -0.00896896 | 1256.64844 | 629.3315 | 1256.65747 | 629.335999 | 2 | 10 | 19.6995 | 1.45  |
| 1  | 72.1  | 72.1  | 60.4 RNF8_Flexill      | 98.9 INKVSCESGQPVK               | Label:13C(6)15N(2)(K)@3; Propionamide(C)@6; Label:13C(6)15N(2)(K)@13                            | missed K-V@3                | 0.00193353  | 1474.78027 | 492.6007 | 1474.77844 | 492.600098 | 3 | 11 | 13.4031 | 17.06 |
| 1  | 72.1  | 72.1  | 60.4 RNF8_Flexill      | 98.9 MNNLSSEVKER                 | Label:13C(6)15N(2)(K)@10; Label:13C(6)15N(4)(R)@12                                              | missed K-E@10               | 0.00479244  | 1422.73023 | 475.2507 | 1422.70559 | 475.249146 | 3 | 11 | 14.9988 | 17.06 |
| 65 | 25.39 | 29.86 | 33.5 BAIAP2L2_Flexill  | 98.8 LRPTITNDR                   | Label:13C(6)15N(4)(R)@2; Deamidated(N)@7; Label:13C(6)15N(4)(R)@9                               |                             | -0.00021912 | 1105.59912 | 369.5403 | 1105.59949 | 369.540436 | 3 | 9  | 14.2547 | 0.51  |
| 32 | 41.57 | 43.64 | 69.8 BMP7_Flexill      | 98.8 SALADFSLDNEVHSSFHR          | Deamidated(N)@10; Label:13C(6)15N(4)(R)@19                                                      |                             | 0.0100425   | 2155.03125 | 719.351  | 2155.021   | 719.347595 | 3 | 10 | 26.6525 | 17.44 |
| 53 | 31.04 | 33.33 | 61.1 IRF3_Flexill      | 98.8 DKPDLPTWKR                  | Label:13C(6)15N(2)(K)@2; Label:13C(6)15N(2)(K)@9; Label:13C(6)15N(4)(R)@10                      | missed K-R@9                | -0.00233662 | 1280.70672 | 641.3605 | 1280.70874 | 641.361633 | 2 | 9  | 15.6578 | 5.45  |
| 11 | 52.74 | 54.75 | 70.6 HOXC10_Flexill    | 98.8 TEQSLAGPK                   | Label:13C(6)15N(2)(K)@9                                                                         |                             | -0.001091   | 937.494873 | 469.7547 | 937.496033 | 469.75528  | 2 | 9  | 13.1853 | 7.09  |
| 24 | 45.3  | 47.31 | 60.7 WNT7A_Flexill     | 98.9 YGIGFAK                     | Label:13C(6)15N(2)(K)@7                                                                         |                             | 0.00979989  | 762.425476 | 382.22   | 762.415588 | 382.215057 | 2 | 7  | 16.6461 | 13.38 |
| 40 | 39.12 | 41.12 | 63.3 VASP_Flexill      | 98.8 ATVMLYDDGNKR                | Label:13C(6)15N(2)(K)@11; Label:13C(6)15N(4)(R)@12                                              | missed K-R@11               | -0.0001483  | 1399.68823 | 467.57   | 1399.68848 | 467.570099 | 3 | 10 | 15.601  | 4.96  |
| 65 | 25.39 | 29.86 | 33.5 BAIAP2L2_Flexill  | 98.8 ALVSHSEGANHTLLR             | Label:13C(6)15N(4)(R)@15                                                                        |                             | 0.00037342  | 1613.85181 | 404.4702 | 1613.85132 | 404.470093 | 4 | 10 | 14.9305 | 0.51  |
| 65 | 25.39 | 29.86 | 33.5 BAIAP2L2_Flexill  | 98.8 LRPTITNDR                   | Label:13C(6)15N(4)(R)@2; Label:13C(6)15N(4)(R)@9                                                |                             | -0.00625664 | 1104.60901 | 369.2103 | 1104.61548 | 369.212433 | 3 | 9  | 13.9871 | 0.51  |
| 65 | 25.39 | 29.86 | 33.5 BAIAP2L2_Flexill  | 98.8 QHYELEYR                    | Label:13C(6)15N(4)(R)@8                                                                         |                             | -0.014073   | 1146.51929 | 383.1804 | 1146.53333 | 383.185059 | 3 | 9  | 15.4313 | 0.51  |
| 1  | 72.1  | 72.1  | 60.4 RNF8_Flexill      | 98.8 DFEAIIQAK                   | Label:13C(6)15N(2)(K)@9                                                                         |                             | 0.00826733  | 1041.5669  | 521.7907 | 1041.55859 | 521.78656  | 2 | 9  | 26.5473 | 17.06 |
| 18 | 48.12 | 50.3  | 76.2 EVL_Flexill       | 98.8 KVVPIKPGQQGFSR              | Label:13C(6)15N(2)(K)@1; Label:13C(6)15N(2)(K)@6; Label:13C(6)15N(4)(R)@14                      | missed K-W@1                | 0.0116762   | 1652.948   | 551.9899 | 1652.93616 | 551.985962 | 3 | 10 | 15.9512 | 16.66 |
| 33 | 41.31 | 43.51 | 73.9 CDCA7_Flexill     | 98.8 GICNCSFCR                   | Propionamide(C)@3; Propionamide(C)@5; Propionamide(C)@8; Label:13C(6)15N(4)(R)@9                |                             | -0.00046874 | 1224.50732 | 613.2609 | 1224.50769 | 613.261169 | 2 | 9  | 15.9122 | 7.86  |
| 67 | 22.59 | 26.91 | 26.5 HCK_Flexill       | 98.8 LSVPMSSSKPQKPWEK            | Propionamide(C)@5; Label:13C(6)15N(2)(K)@9; Label:13C(6)15N(2)(K)@12; Label:13C(6)15N(2)(K)@16  |                             | -0.00173919 | 1939.0105  | 485.7599 | 1939.01221 | 485.760315 | 4 | 10 | 16.3264 | 0.80  |
| 13 | 50.86 | 52.87 | 65.6 IL16_Flexill      | 98.8 SMLCLNAK                    | Propionamide(C)@5; Label:13C(6)15N(2)(K)@8                                                      |                             | -0.00207571 | 957.48468  | 479.7496 | 957.486694 | 479.750641 | 2 | 8  | 16.3726 | 13.95 |
| 14 | 50.19 | 52.2  | 65.0 HIF1AN_Flexill    | 98.8 YNPTFLYK                    | Label:13C(6)15N(2)(K)@9                                                                         |                             | -0.00098747 | 1215.60461 | 608.8096 | 1215.60559 | 608.810059 | 2 | 10 | 18.3694 | 25.53 |
| 19 | 47.69 | 49.71 | 41.5 NUF2_Flexill      | 98.8 LGIQQLK                     | Label:13C(6)15N(2)(K)@7                                                                         |                             | 0.00213914  | 806.512695 | 404.2636 | 806.510559 | 404.262543 | 2 | 8  | 16.272  | 8.30  |
| 1  | 72.1  | 72.1  | 60.4 RNF8_Flexill      | 98.8 VGMSAGWLLLEDGCEVTVGR        | Propionamide(C)@14; Label:13C(6)15N(4)(R)@20                                                    |                             | 0.0122262   | 2172.07056 | 725.0308 | 2172.05835 | 725.026672 | 3 | 8  | 26.8751 | 17.06 |
| 10 | 53.11 | 55.13 | 57.4 TP53_Flexill      | 98.8 ERFEMFR                     | Label:13C(6)15N(4)(R)@2; Label:13C(6)15N(4)(R)@7                                                | missed R-F@2                | -0.00103482 | 1033.49085 | 345.5042 | 1033.49182 | 345.504547 | 3 | 8  | 16.952  | 9.55  |
| 36 | 40.58 | 42.7  | 45.4 CSNK1D_Flexill    | 98.8 THQHPIYR                    | Label:13C(6)15N(4)(R)@8                                                                         |                             | -0.00264503 | 1060.54138 | 354.5211 | 1060.54419 | 354.522003 | 3 | 8  | 13.0328 | 14.60 |
| 39 | 39.97 | 42    | 41.5 SQCS5_Flexill     | 98.8 WHLUK                       | Label:13C(6)15N(2)(K)@5                                                                         |                             | -0.00085062 | 703.425293 | 352.7199 | 703.426086 | 352.720306 | 2 | 7  | 16.2027 | 1.66  |
| 43 | 38.44 | 40.47 | 30.1 ARPC1B_Flexill    | 98.8 DRTQIACPNNHVHHYK            | Label:13C(6)15N(4)(R)@2; Propionamide(C)@8; Deamidated(N)@10; Label:13C(6)15N(2)(K)@19          | missed R-T@2                | 0.0147655   | 2369.17017 | 593.2998 | 2369.15527 | 593.296082 | 4 | 11 | 16.0684 | 4.64  |
| 73 | 20.3  | 23.6  | 44.5 TNFRSF10B_Flexill | 98.8 YGQDYSTHWNDLLFCLR           | Deamidated(Q)@3; Propionamide(C)@15; Label:13C(6)15N(4)(R)@17                                   |                             | 0.0356136   | 2212.02783 | 738.3499 | 2211.99219 | 738.338074 | 3 | 11 | 19.6864 | 34.27 |
| 35 | 40.71 | 42.76 | 46.9 SP100_Flexill     | 98.7 KTFPFLGLR                   | Label:13C(6)15N(2)(K)@1; Label:13C(6)15N(4)(R)@10                                               | missed K-T@1                | -8.87E-05   | 1224.69849 | 409.2401 | 1224.69861 | 409.240143 | 3 | 9  | 18.693  | 15.89 |
| 68 | 22.06 | 24.16 | 23.2 FSCN3_Flexill     | 98.7 FISVIYDGEVR                 | Label:13C(6)15N(4)(R)@11                                                                        |                             | 0.00920789  | 1306.68884 | 654.3517 | 1306.67969 | 654.347107 | 2 | 10 | 18.4816 | 1.45  |
| 8  | 55.19 | 57.27 | 53.1 CALU_Flexill      | 98.7 LTKEEIVDKYDLFVGSQATDFGEALVR | Label:13C(6)15N(2)(K)@3; Label:13C(6)15N(2)(K)@9; Deamidated(Q)@17; Label:13C(6)15N(4)(R)@27    | missed K-E@3; missed K-Y@9  | 0.0356459   | 3069.61133 | 1024.211 | 3069.57568 | 1024.19922 | 3 | 6  | 26.7122 | 7.97  |
| 18 | 48.12 | 50.3  | 76.2 EVL_Flexill       | 98.7 LQDQVQVINYIVK               | Deamidated(Q)@5; Label:13C(6)15N(2)(K)@14                                                       |                             | 0.0216085   | 1654.92383 | 828.4692 | 1654.9021  | 828.458374 | 2 | 7  | 22.4342 | 16.66 |
| 18 | 48.12 | 50.3  | 76.2 EVL_Flexill       | 98.7 QVMEQHQHQR                  | Gln->pyro-Glu@N-term; Oxidation(M)@3; Label:13C(6)15N(4)(R)@10                                  |                             | -0.00696834 | 1319.58472 | 660.7996 | 1319.59155 | 660.803101 | 2 | 8  | 10.9986 | 16.66 |
| 1  | 72.1  | 72.1  | 60.4 RNF8_Flexill      | 98.7 INKVSCESGQPVK               | Deamidated(N)@2; Label:13C(6)15N(2)(K)@3; Propionamide(C)@6; Label:13C(6)15N(2)(K)@13           | missed K-V@3                | 0.00448989  | 1475.76685 | 738.8907 | 1475.76245 | 738.888489 | 2 | 11 | 13.6022 | 17.06 |
| 1  | 72.1  | 72.1  | 60.4 RNF8_Flexill      | 98.7 KFSLDLADGPAEGPSNLK          | Label:13C(6)15N(2)(K)@1; Label:13C(6)15N(2)(K)@19                                               | missed K-F@1                | 0.0175763   | 1945.03027 | 649.3507 | 1945.0127  | 649.344849 | 3 | 11 | 18.0841 | 17.06 |
| 10 | 53.11 | 55.13 | 57.4 TP53_Flexill      | 98.7 ERFEMFR                     | Label:13C(6)15N(4)(R)@2; Label:13C(6)15N(4)(R)@7                                                |                             | -0.00051785 | 1033.49133 | 517.7529 | 1033.49182 | 517.753174 | 2 | 9  | 16.9715 | 9.55  |
| 10 | 53.11 | 55.13 | 57.4 TP53_Flexill      | 98.7 KGEPHHELPGSTKR              | Label:13C(6)15N(2)(K)@1; Label:13C(6)15N(2)(K)@14; Label:13C(6)15N(4)(R)@15                     | missed K-G@1; missed K-R@14 | -0.014855   | 1694.89136 | 424.7301 | 1694.90625 | 424.733856 | 4 | 9  | 8.1602  | 9.55  |
| 38 | 40.23 | 42.26 | 57.4 CDK4_Flexill      | 98.7 LMDVCATSR                   | Oxidation(M)@2; Propionamide(C)@5; Label:13C(6)15N(4)(R)@9                                      |                             | 0.0006604   | 1091.49841 | 546.7565 | 1091.49793 | 546.756226 | 2 | 9  | 14.2757 | 14.73 |
| 38 | 40.23 | 42.26 | 57.4 CDK4_Flexill      | 98.7 VTLVFEHVDDQLR               | Label:13C(6)15N(4)(R)@13                                                                        |                             | 0.015592    | 1579.83875 | 527.6202 | 1579.82336 | 527.615051 | 3 | 8  | 21.7209 | 14.73 |
| 45 | 37.2  | 41.27 | 48.7 CDC2L5_Flexill    | 98.7 LYSSEESRPYTNK               | Label:13C(6)15N(4)(R)@8                                                                         |                             |             |            |          |            |            |   |    |         |       |

|    |       |       |                       |                                        |                                                                                                                 |                             |             |            |            |            |            |    |         |         |       |
|----|-------|-------|-----------------------|----------------------------------------|-----------------------------------------------------------------------------------------------------------------|-----------------------------|-------------|------------|------------|------------|------------|----|---------|---------|-------|
| 31 | 41.62 | 43.81 | 59.6 LIMS1_FlexIII    | 98.6 CEKPFLLGHR                        | Propionamide(C)@1; Label:13C(6)15N(2)(K)@3; Label:13C(6)15N(4)(R)@9                                             | -0.00064424                 | 1174.60291  | 392.5416   | 1174.60364 | 392.541809 | 3          | 9  | 14.0582 | 4.68    |       |
| 46 | 36.36 | 38.64 | 86.3 HOXC11_FlexIII   | 98.6 EFFFNVYINK                        | Label:13C(6)15N(2)(K)@10                                                                                        | 0.00067879                  | 1327.66992  | 664.8422   | 1327.66919 | 664.841858 | 2          | 10 | 19.7219 | 3.80    |       |
| 2  | 66.54 | 68.54 | 65.5 FZR1_FlexIII     | 98.6 RSSPDGNDVSPYSLSPVSNK              | Label:13C(6)15N(4)(R)@1; Deamidated(N)@8; Label:13C(6)15N(2)(K)@21                                              | 0.0234009                   | 2239.05933  | 747.3604   | 2239.03589 | 747.3526   | 3          | 11 | 16.3316 | 12.66   |       |
| 14 | 50.19 | 52.2  | 65.0 HIF1A_N_FlexIII  | 98.6 KMANFQNKPKR                       | Label:13C(6)15N(2)(K)@1; Label:13C(6)15N(2)(K)@9; Label:13C(6)15N(4)(R)@11                                      | misses R-S@1                | -0.0210834  | 1405.729   | 352.4395   | 1405.74988 | 352.444763 | 4  | 10      | 15.6125 | 25.53 |
| 38 | 40.23 | 42.26 | 57.4 CDK4_FlexIII     | 98.6 LADFLGLAR                         | Label:13C(6)15N(4)(R)@8                                                                                         | misses K-M@1                | -0.00109369 | 871.478088 | 436.7463   | 871.479126 | 436.746826 | 2  | 9       | 17.2509 | 14.73 |
| 43 | 38.44 | 40.47 | 30.1 ARPC1B_FlexIII   | 98.6 SLESALK                           | Label:13C(6)15N(2)(K)@7                                                                                         | -0.00096743                 | 754.430664  | 378.2226   | 754.431641 | 378.223084 | 2          | 8  | 15.8168 | 4.64    |       |
| 45 | 37.2  | 41.27 | 48.7 CDC2L5_FlexIII   | 98.6 LADFLGLAR                         | Label:13C(6)15N(4)(R)@8                                                                                         | -0.00109369                 | 871.478088  | 436.7463   | 871.479126 | 436.746826 | 2          | 9  | 17.2509 | 12.09   |       |
| 67 | 22.59 | 26.91 | 26.5 HCK_FlexIII      | 98.6 IADFLGLAR                         | Label:13C(6)15N(4)(R)@8                                                                                         | -0.00109369                 | 871.478088  | 436.7463   | 871.479126 | 436.746826 | 2          | 9  | 17.2509 | 0.80    |       |
| 1  | 72.1  | 72.1  | 60.4 RNF8_FlexIII     | 98.6 VSCESGQPVK                        | Propionamide(C)@3; Label:13C(6)15N(2)(K)@10                                                                     | 0.00260075                  | 1111.54492  | 556.7797   | 1111.54236 | 556.778442 | 2          | 9  | 10.8046 | 17.06   |       |
| 81 | 17.8  | 20.23 | 78.7 CREB1_FlexIII    | 98.6 TLIEELKALKDLYCHK                  | Label:13C(6)15N(2)(K)@7; Label:13C(6)15N(2)(K)@10; Propionamide(C)@14; Label:13C(6)15N(2)(K)@16                 | misses K-A@7; misses K-D@10 | -0.0109939  | 2011.11304 | 403.2299   | 2011.12378 | 403.232056 | 5  | 10      | 19.5458 | 9.31  |
| 16 | 48.74 | 50.75 | 67.3 CAMK2B_FlexIII   | 98.6 ICDPGLTSFEPEALGNLVEGMDFHR         | Propionamide(C)@2; Deamidated(N)@16                                                                             | 0.0343834                   | 2818.32837  | 940.4501   | 2818.29419 | 940.43866  | 3          | 11 | 20.2649 | 20.90   |       |
| 1  | 72.1  | 72.1  | 60.4 RNF8_FlexIII     | 98.6 LTALEPSK                          | Label:13C(6)15N(2)(K)@8                                                                                         | 0.00067242                  | 865.500671  | 433.7576   | 865.500061 | 433.757294 | 2          | 9  | 14.8663 | 17.06   |       |
| 29 | 42.79 | 44.97 | 59.5 PBK_FlexIII      | 98.6 GLSHSPWAVK                        | Label:13C(6)15N(2)(K)@10                                                                                        | 0.00241948                  | 1088.58814  | 363.87     | 1088.58582 | 363.869232 | 3          | 10 | 16.0788 | 17.23   |       |
| 5  | 59.76 | 61.76 | 81.6 2-SEP_FlexIII    | 98.5 AIHNKVNVPVIAK                     | Label:13C(6)15N(2)(K)@5; Label:13C(6)15N(2)(K)@14                                                               | misses K-V@5                | 0.0119851   | 1530.97009 | 383.7498   | 1530.95831 | 383.746796 | 4  | 10      | 16.2048 | NA    |
| 5  | 59.76 | 61.76 | 81.6 2-SEP_FlexIII    | 98.5 RMOEMJAR                          | Label:13C(6)15N(4)(R)@1; Label:13C(6)15N(4)(R)@8                                                                | misses R-M@1                | -0.00028259 | 1053.53223 | 352.1847   | 1053.53259 | 352.184815 | 3  | 9       | 14.5051 | NA    |
| 22 | 45.72 | 47.76 | 72.9 BCKDK_FlexIII    | 98.5 KHIEDEKLVR                        | Label:13C(6)15N(2)(K)@1; Label:13C(6)15N(2)(K)@7; Label:13C(6)15N(4)(R)@10                                      | misses K-H@1; misses K-L@7  | -0.0120166  | 1291.73377 | 323.9407   | 1291.74585 | 323.943726 | 4  | 10      | 12.9903 | 2.26  |
| 22 | 45.72 | 47.76 | 72.9 BCKDK_FlexIII    | 98.5 VMDYHFTTAESTQDPR                  | Deamidated(Q)@14; Label:13C(6)15N(4)(R)@17                                                                      | 0.00753876                  | 1978.86816  | 660.63     | 1978.8606  | 660.627502 | 3          | 11 | 16.2684 | 2.26    |       |
| 74 | 19.77 | 22.05 | 31.7 CD2_FlexIII      | 98.5 ESSVEPVSCPEK                      | Propionamide(C)@9; Label:13C(6)15N(2)(K)@12                                                                     | -0.00804554                 | 1368.62427  | 685.3194   | 1368.6322  | 685.323425 | 2          | 10 | 14.7766 | 11.54   |       |
| 14 | 50.19 | 52.2  | 65.0 HIF1A_N_FlexIII  | 98.5 FHEFVEK                           | Label:13C(6)15N(2)(K)@7                                                                                         | -0.00233364                 | 942.466614  | 315.1628   | 942.469055 | 315.163635 | 3          | 9  | 15.0094 | 25.53   |       |
| 24 | 45.3  | 47.31 | 60.7 WNT7A_FlexIII    | 98.5 ILEENMKLECK                       | Label:13C(6)15N(2)(K)@7; Propionamide(C)@10; Label:13C(6)15N(2)(K)@11                                           | misses K-L@7                | 0.00911345  | 1435.74756 | 479.5898   | 1435.73853 | 479.586792 | 3  | 9       | 15.972  | 13.38 |
| 60 | 26.43 | 28.47 | 59.7 FCRLA_FlexIII    | 98.5 EFSITVQVK                         | Label:13C(6)15N(2)(K)@9                                                                                         | -0.00495281                 | 1057.58484  | 529.7997   | 1057.58997 | 529.802246 | 2          | 7  | 24.2345 | 41.77   |       |
| 1  | 72.1  | 72.1  | 60.4 RNF8_FlexIII     | 98.5 ICLMISR                           | Propionamide(C)@2; Label:13C(6)15N(4)(R)@8                                                                      | 0.00058067                  | 1012.54425  | 507.2794   | 1012.5437  | 507.279144 | 2          | 9  | 17.5876 | 17.06   |       |
| 13 | 50.86 | 52.87 | 65.6 IL16_FlexIII     | 98.5 SLMLCNAK                          | Propionamide(C)@5; Label:13C(6)15N(2)(K)@8                                                                      | -0.00207571                 | 957.48468   | 479.7496   | 957.486694 | 479.750641 | 2          | 9  | 16.1083 | 13.95   |       |
| 19 | 47.69 | 49.71 | 41.5 NUF2_FlexIII     | 98.5 LSVVSLK                           | Label:13C(6)15N(2)(K)@7                                                                                         | 0.00188436                  | 752.490662  | 377.2526   | 752.48877  | 377.251648 | 2          | 8  | 16.6741 | 8.30    |       |
| 29 | 42.79 | 44.97 | 59.5 PBK_FlexIII      | 98.5 AFTEANDGSLCLAMEYGGEK              | Propionamide(C)@11; Label:13C(6)15N(2)(K)@20                                                                    | -0.0054824                  | 2183.95093  | 728.9909   | 2183.95947 | 728.993774 | 3          | 11 | 18.6631 | 17.23   |       |
| 29 | 42.79 | 44.97 | 59.5 PBK_FlexIII      | 98.5 KNPICNDHYR                        | Label:13C(6)15N(2)(K)@7; Propionamide(C)@6; Deamidated(N)@7; Label:13C(6)15N(4)(R)@11                           | misses K-I@1                | 0.00036868  | 1461.71558 | 488.2458   | 1461.71533 | 488.245728 | 3  | 11      | 14.9646 | 17.23 |
| 36 | 40.58 | 42.7  | 45.4 CSNK1D_FlexIII   | 98.6 MMGGVGPIPIR                       | Label:13C(6)15N(4)(R)@12                                                                                        | -0.00080506                 | 1268.66003  | 635.3373   | 1268.66089 | 635.337708 | 2          | 10 | 18.0046 | 14.60   |       |
| 36 | 40.58 | 42.7  | 45.4 CSNK1D_FlexIII   | 98.5 TKHPQLHIESK                       | Label:13C(6)15N(2)(K)@2; Label:13C(6)15N(2)(K)@11                                                               | -0.00179531                 | 1332.7467   | 445.2562   | 1332.74854 | 445.256775 | 3          | 10 | 13.0358 | 14.60   |       |
| 5  | 59.76 | 61.76 | 81.6 2-SEP_FlexIII    | 98.5 KTLTVEK                           | Label:13C(6)15N(2)(K)@1; Label:13C(6)15N(2)(K)@9                                                                | -0.00165298                 | 932.565064  | 311.8623   | 932.566589 | 311.862624 | 3          | 8  | 16.2556 | NA      |       |
| 6  | 58.66 | 60.67 | 85.0 ARRB1_FlexIII    | 98.5 EILGIYSYK                         | Label:13C(6)15N(2)(K)@10                                                                                        | -0.00155802                 | 1141.68225  | 571.8484   | 1141.68384 | 571.849182 | 2          | 9  | 19.0748 | 18.42   |       |
| 49 | 33.63 | 37.69 | 49.1 TDG_FlexIII      | 98.5 CLFMSGLSEVOLNHMDHTLPGKYGIGFTNMVER | Propionamide(C)@1; Deamidated(N)@13; Label:13C(6)15N(2)(K)@23; Label:13C(6)15N(4)(R)@34                         | misses K-Y@23               | 0.0292249   | 3928.86646 | 786.7806   | 3928.83765 | 786.77478  | 5  | 11      | 19.1644 | 7.02  |
| 9  | 54.6  | 56.93 | 78.8 MAT1A_FlexIII    | 98.5 LVFYPTFLYK                        | Label:13C(6)15N(2)(K)@10                                                                                        | 0.00042123                  | 1297.7207   | 649.8676   | 1297.72022 | 649.867371 | 2          | 11 | 20.0742 | 26.98   |       |
| 1  | 72.1  | 72.1  | 60.4 RNF8_FlexIII     | 98.5 RKIECPICR                         | Label:13C(6)15N(4)(R)@1; Label:13C(6)15N(2)(K)@2; Propionamide(C)@5; Propionamide(C)@8; Label:13C(6)15N(4)(R)@9 | misses R-K@1; misses K-I@2  | 0.0158084   | 1286.71033 | 429.9107   | 1286.69458 | 429.905457 | 3  | 10      | 14.0396 | 17.06 |
| 45 | 37.2  | 41.27 | 48.7 CDC2L5_FlexIII   | 98.5 EIVTDKEDALDFK                     | Label:13C(6)15N(2)(K)@6; Label:13C(6)15N(2)(K)@13; Label:13C(6)15N(2)(K)@14                                     | -0.00335186                 | 1673.8938   | 419.4799   | 1673.8938  | 419.480743 | 4          | 10 | 15.9325 | 12.09   |       |
| 14 | 50.19 | 52.2  | 65.0 HIF1A_N_FlexIII  | 98.5 GRYNYPTFLYK                       | Label:13C(6)15N(4)(R)@2; Label:13C(6)15N(2)(K)@11                                                               | misses R-Y@2                | 0.0103176   | 1438.7467  | 480.5895   | 1438.73645 | 480.58609  | 3  | 10      | 17.6231 | 25.53 |
| 30 | 42.3  | 44.42 | 46.2 ZCCHC12_FlexIII  | 98.4 VAPGEYNDFSEPLYPTFLYK              | Deamidated(N)@7; Label:13C(6)15N(2)(K)@20                                                                       | 0.0129606                   | 2358.13135  | 787.0511   | 2358.11865 | 787.046875 | 3          | 11 | 19.7804 | 11.45   |       |
| 8  | 55.19 | 57.27 | 53.1 CALU_FlexIII     | 98.4 GHDLNEDGLVSWEYK                   | Deamidated(N)@5; Label:13C(6)15N(2)(K)@16                                                                       | 0.0164562                   | 1898.85791  | 633.9599   | 1898.84143 | 633.954407 | 3          | 9  | 21.2235 | 7.97    |       |
| 46 | 36.36 | 38.64 | 86.3 HOXC11_FlexIII   | 98.4 ECLPPSTTEILMK                     | Propionamide(C)@2; Label:13C(6)15N(2)(K)@14                                                                     | 0.00400245                  | 1638.84924  | 820.4319   | 1638.84522 | 820.429871 | 2          | 10 | 19.22   | 3.80    |       |
| 43 | 38.44 | 40.47 | 30.1 ARPC1B_FlexIII   | 98.4 NAYYWTLK                          | Label:13C(6)15N(2)(K)@8                                                                                         | 0.00312095                  | 1001.54565  | 501.7801   | 1001.54254 | 501.778565 | 2          | 9  | 18.2159 | 4.64    |       |
| 57 | 27.77 | 29.91 | 42.0 MAPK9_FlexIII    | 98.4 YQQLKPIGSSGAQGVCAAFDTVLGINVAVKK   | Label:13C(6)15N(2)(K)@5; Propionamide(C)@16; Label:13C(6)15N(2)(K)@30; Label:13C(6)15N(2)(K)@31                 | misses K-K@30               | -0.0343345  | 3282.79833 | 1095.27    | 3282.82251 | 1095.28137 | 3  | 10      | 20.3949 | 2.36  |
| 9  | 54.6  | 56.93 | 78.8 MAT1A_FlexIII    | 98.4 NFDLRPGVIVR                       | Label:13C(6)15N(4)(R)@5; Label:13C(6)15N(4)(R)@11                                                               | -0.00103819                 | 1304.74573  | 653.3801   | 1304.74683 | 653.380676 | 2          | 11 | 17.438  | 26.98   |       |
| 16 | 48.74 | 50.75 | 67.3 CAMK2B_FlexIII   | 98.6 NLINQMILTINPAKR                   | Label:13C(6)15N(2)(K)@13; Label:13C(6)15N(4)(R)@14                                                              | -0.00256323                 | 1642.92822  | 548.65     | 1642.93079 | 548.650879 | 3          | 10 | 26.5224 | 20.90   |       |
| 80 | 18    | 20    | 26.9 PSEN1_FlexIII    | 98.4 QVVEQDEEEDIELTK                   | Gln->pyro-Glu@N-term; Label:13C(6)15N(2)(K)@16                                                                  | -0.0083785                  | 1922.86401  | 662.4393   | 1922.87244 | 662.443481 | 2          | 10 | 20.8237 | 27.70   |       |
| 18 | 48.12 | 50.3  | 76.2 EVL_FlexIII      | 98.3 KEDESOMEDPSTSPSPGTR               | Label:13C(6)15N(2)(K)@1; Label:13C(6)15N(4)(R)@19                                                               | -0.00637567                 | 2094.90674  | 699.3095   | 2094.91309 | 699.311646 | 3          | 10 | 13.6882 | 16.66   |       |
| 1  | 72.1  | 72.1  | 60.4 RNF8_FlexIII     | 98.3 KIECPICR                          | Label:13C(6)15N(2)(K)@1; Propionamide(C)@4; Propionamide(C)@7; Label:13C(6)15N(4)(R)@8                          | misses K-I@1                | 0.00098077  | 1120.5863  | 561.3004   | 1120.58521 | 561.299866 | 2  | 10      | 14.8839 | 17.06 |
| 12 | 51.78 | 53.79 | 72.4 CSNK1A1L_FlexIII | 98.3 DNYPTFLYK                         | Label:13C(6)15N(2)(K)@9                                                                                         | -0.00019418                 | 1167.56885  | 584.7917   | 1167.56921 | 584.79187  | 2          | 9  | 18.0383 | 9.79    |       |
| 13 | 50.86 | 52.87 | 65.6 IL16_FlexIII     | 98.3 KGLLTLTVR                         | Label:13C(6)15N(2)(K)@1; Label:13C(6)15N(4)(R)@9                                                                | -0.00179643                 | 1017.66467  | 509.8396   | 1017.66665 | 509.840546 | 2          | 9  | 17.4975 | 13.95   |       |
| 33 | 41.31 | 43.51 | 73.9 CDCA7_FlexIII    | 98.3 AYPTFLYK                          | Label:13C(6)15N(2)(K)@8                                                                                         | -0.00066355                 | 1009.53565  | 505.7751   | 1009.53644 | 505.775482 | 2          | 9  | 17.8562 | 7.86    |       |
| 41 | 38.89 | 40.91 | 49.1 CASP9_FlexIII    | 98.3 LVEELOVDQLWDALLSR                 | Deamidated(Q)@9; Label:13C(6)15N(4)(R)@17                                                                       | 0.0324376                   | 2037.09815  | 680.04     | 2037.06588 | 680.029236 | 3          | 6  | 26.7798 | 23.69   |       |
| 49 | 33.63 | 37.69 | 49.1 TDG_FlexIII      | 98.3 AYPTFLYK                          | Label:13C(6)15N(2)(K)@8                                                                                         | -0.00066355                 | 1009.53565  | 505.7751   | 1009.53644 | 505.775482 | 2          | 9  | 17.8562 | 7.02    |       |
| 9  | 54.6  | 56.93 | 78.8 MAT1A_FlexIII    | 98.3 TERELEDVHHK                       | Label:13C(6)15N(4)(R)@3; Label:13C(6)15N(2)(K)@11                                                               | -0.0183891                  | 1355.7345   | 339.9409   | 1355.75281 | 339.945465 | 4          | 11 | 15.9725 | 26.98   |       |
| 52 | 31.37 | 33.43 | 67.8 MMP28_FlexIII    | 98.3 GSHFWEVAADGNVSEPRPLQER            | Label:13C(6)15N(4)(R)@17; Label:13C(6)15N(4)(R)@22                                                              | 0.00982849                  | 2500.20972  | 626.0597   | 2500.19971 | 626.057251 | 4          | 10 | 17.3279 | 2.09    |       |
| 5  | 59.76 | 61.76 | 81.6 2-SEP_FlexIII    | 98.2 ADTLTK                            | Label:13C(6)15N(2)(K)@7                                                                                         | -0.00221648                 | 768.445068  | 385.2298   | 768.447266 | 385.230896 | 2          | 8  | 15.7824 | NA      |       |
| 24 | 45.3  | 47.31 | 60.7 WNT7A_FlexIII    | 98.2 KILEENMK                          | Label:13C(6)15N(2)(K)@1; Label:13C(6)15N(2)(K)@8                                                                | -0.00744691                 | 1019.55811  | 340.86     | 1019.56561 | 340.862488 | 3          | 8  | 14.2192 | 13.38   |       |
| 3  | 63.81 | 65.81 | 53.9 XIAP_FlexIII     | 98.2 TTEKTPSLTR                        | Label:13C(6)15N(2)(K)@4; Label:13C(6)15N(4)(R)@10                                                               | misses K-T@4                | 0.00196488  | 1150.6333  | 384.5517   | 1150.63123 | 384.551025 | 3  | 9       | 13.8556 | 2.38  |
| 18 | 48.12 | 50.3  | 76.2 EVL_FlexIII      | 98.2 SPLOSOPHSR                        | Label:13C(6)15N(2)(K)@9                                                                                         | -0.00428769                 | 1135.56909  | 379.5303   | 1135.57336 | 379.531738 | 3          | 8  | 9.6376  | 16.66   |       |
| 22 | 45.72 | 47.76 | 72.9 BCKDK_FlexIII    | 98.3 KHIEDEKLVR                        | Label:13C(6)15N(2)(K)@1; Label:13C(6)15N(4)(R)@19                                                               | misses K-H@1; misses K-L@7  | 0.00379663  | 1291.74972 | 431.5905   | 1291.74585 | 431.589253 | 3  | 10      | 12.4974 | 2.26  |
| 60 | 26.43 | 28.47 | 59.7 FCRLA_FlexIII    | 98.2 AVPSAEPQAGSPMTLSCQTK              | Propionamide(C)@17; Label:13C(6)15N(2)(K)@20                                                                    | -0.0139728                  | 2080.98731  | 694.6697   | 2081.00122 | 694.674377 | 3          | 9  | 21.8635 | 41.77   |       |
| 38 | 40.23 | 42.26 | 57.4 CDK4_FlexIII     | 98.2 DPHSGHFVALK                       | Label:13C(6)15N(2)(K)@11                                                                                        | 0.00084474                  | 1214.62976  | 304.6647   | 1214.62878 | 304.664459 | 4          | 9  | 15.0302 | 14.73   |       |
| 10 | 53.11 | 55.13 | 57.4 TP53_FlexIII     | 98.2 TYQGSYGRF                         | Label:13C(6)                                                                                                    |                             |             |            |            |            |            |    |         |         |       |

|    |       |       |                      |                                    |                                                                                                                      |             |            |          |            |            |   |    |         |       |
|----|-------|-------|----------------------|------------------------------------|----------------------------------------------------------------------------------------------------------------------|-------------|------------|----------|------------|------------|---|----|---------|-------|
| 65 | 25.39 | 29.86 | 33.5 BAIAP2L2_FlexII | 98.1 ALVSHSEGANHTLLR               | Deamidated(N) @10; Label:13C(6)15N(4)(R) @15                                                                         | 0.0172142   | 1614.85254 | 404.7204 | 1614.83533 | 404.716126 | 4 | 10 | 15.2522 | 0.51  |
| 16 | 48.74 | 50.75 | 67.3 CAMK2B_FlexII   | 98.1 NSKPIHTTTLNPHVHVIGDEAACIAYIR  | Label:13C(6)15N(2)(K) @3; Deamidated(N) @11; Propionamide(C) @23; Label:13C(6)15N(4)(R) @28                          | 0.00203407  | 3171.66382 | 635.34   | 3171.66187 | 635.339661 | 5 | 11 | 26.8901 | 20.90 |
| 16 | 48.74 | 50.75 | 67.3 CAMK2B_FlexII   | 98.1 STVASMMHR                     | Label:13C(6)15N(4)(R) @9                                                                                             | -0.00135688 | 1028.47559 | 343.8325 | 1028.47705 | 343.832977 | 3 | 9  | 14.8528 | 20.90 |
| 70 | 21.59 | 23.62 | 34.5 NLE1_FlexII     | 98.1 NGQILLWDPSTGK                 | Deamidated(N) @1; Label:13C(6)15N(2)(K) @13                                                                          | 0.00125331  | 1436.74023 | 719.3774 | 1436.73914 | 719.376831 | 2 | 10 | 19.1381 | 25.98 |
| 42 | 38.57 | 40.97 | 55.8 MAPKAPK3_FlexII | 98.1 VDYDQVK                       | Label:13C(6)15N(2)(K) @7                                                                                             | -0.00054342 | 873.431885 | 437.7232 | 873.432373 | 437.72345  | 2 | 8  | 14.5547 | 15.68 |
| 9  | 54.6  | 56.93 | 78.8 MAT1A_FlexII    | 98.1 SGLLPWLVRPDSK                 | Label:13C(6)15N(4)(R) @8; Label:13C(6)15N(2)(K) @12                                                                  | 0.00100837  | 1385.77954 | 462.9338 | 1385.77856 | 462.933472 | 3 | 11 | 19.0888 | 26.98 |
| 12 | 51.78 | 53.79 | 72.4 CSNK1A1L_FlexII | 98.1 TSLPWQGLK                     | Label:13C(6)15N(2)(K) @9                                                                                             | 0.00525949  | 1036.58484 | 519.2997 | 1036.57971 | 519.297119 | 2 | 9  | 18.7205 | 9.79  |
| 22 | 45.72 | 47.76 | 72.9 BCKDK_FlexII    | 98.1 LTPTMMLYAGR                   |                                                                                                                      | -0.00325287 | 1252.62744 | 627.321  | 1252.63086 | 627.322693 | 2 | 10 | 18.3623 | 2.26  |
| 18 | 48.12 | 50.3  | 76.2 EVL_FlexII      | 98.0 SPLOSOPHSR                    |                                                                                                                      | -0.00428769 | 1135.56909 | 379.5303 | 1135.57336 | 379.531738 | 3 | 7  | 9.9776  | 16.66 |
| 33 | 41.31 | 43.51 | 73.9 CDCA7_FlexII    | 98.0 GQFCGPCILR                    |                                                                                                                      | -2.22E-05   | 1131.51929 | 566.7669 | 1131.51929 | 566.766907 | 2 | 9  | 16.4234 | 7.86  |
| 15 | 49.13 | 51.13 | 73.0 SRGAP1_FlexII   | 98.0 SGDPVFHIR                     | Propionamide(C) @4; Propionamide(C) @7; Label:13C(6)15N(4)(R) @9                                                     | 0.00409949  | 1036.53699 | 346.5196 | 1036.53296 | 346.51825  | 3 | 8  | 16.5512 | 3.80  |
| 17 | 48.68 | 50.69 | 56.7 PRKACG_FlexII   | 98.0 MKQVEHILNEKR                  | Label:13C(6)15N(2)(K) @2; Label:13C(6)15N(2)(K) @11; Label:13C(6)15N(4)(R) @12                                       | -0.00186505 | 1549.85889 | 388.472  | 1549.86084 | 388.472504 | 4 | 10 | 14.3892 | 16.57 |
| 70 | 21.59 | 23.62 | 34.5 NLE1_FlexII     | 98.0 IVASASFDK                     | Label:13C(6)15N(2)(K) @9                                                                                             | -4.78E-06   | 944.505859 | 473.2602 | 944.505859 | 473.260193 | 2 | 9  | 15.3569 | 25.98 |
| 16 | 48.74 | 50.75 | 67.3 CAMK2B_FlexII   | 98.0 ITAHEALKHPWVVCQR              | Label:13C(6)15N(2)(K) @8; Propionamide(C) @13; Label:13C(6)15N(4)(R) @15                                             | -0.00102124 | 1876.98413 | 470.2533 | 1876.98486 | 470.25351  | 4 | 10 | 15.2608 | 20.90 |
| 16 | 48.74 | 50.75 | 67.3 CAMK2B_FlexII   | 98.0 ITAHEALKHPWVVCQR              | Label:13C(6)15N(2)(K) @8; Propionamide(C) @13; Label:13C(6)15N(4)(R) @15                                             | -0.0006726  | 1876.98413 | 376.4041 | 1876.98486 | 376.404266 | 5 | 10 | 15.5398 | 20.90 |
| 43 | 38.44 | 40.47 | 30.1 ARPC1B_FlexII   | 98.0 WAPNENKFAVGSGR                | Label:13C(6)15N(2)(K) @7; Label:13C(6)15N(4)(R) @15                                                                  | -0.00039762 | 1636.80725 | 566.6097 | 1636.80762 | 566.609863 | 3 | 10 | 16.0629 | 4.64  |
| 1  | 72.1  | 72.1  | 60.4 RNF8_FlexII     | 97.9 VSCESGQPVK                    | Propionamide(C) @3; Label:13C(6)15N(2)(K) @10                                                                        | 0.00125797  | 1111.5437  | 556.7791 | 1111.54236 | 556.778442 | 2 | 8  | 11.3181 | 17.06 |
| 12 | 51.78 | 53.79 | 72.4 CSNK1A1L_FlexII | 97.9 DNYPTFLYK                     | Label:13C(6)15N(2)(K) @9                                                                                             | 0.00102652  | 1167.57031 | 584.7924 | 1167.56921 | 584.79187  | 2 | 9  | 18.3124 | 9.79  |
| 16 | 48.74 | 50.75 | 67.3 CAMK2B_FlexII   | 97.9 SLNKKADGVKPGQTNSTK            | Label:13C(6)15N(2)(K) @5; Label:13C(6)15N(2)(K) @6; Label:13C(6)15N(2)(K) @11; Label:13C(6)15N(2)(K) @18             | -0.00762605 | 1960.11816 | 654.38   | 1960.12585 | 654.382568 | 3 | 10 | 13.5238 | 20.90 |
| 1  | 72.1  | 72.1  | 60.4 RNF8_FlexII     | 97.9 KIECPICRK                     | Label:13C(6)15N(2)(K) @1; Propionamide(C) @4; Propionamide(C) @7; Label:13C(6)15N(4)(R) @8; Label:13C(6)15N(2)(K) @9 | -0.00746523 | 1256.68689 | 629.3507 | 1256.69434 | 629.354431 | 2 | 10 | 13.9305 | 17.06 |
| 74 | 19.77 | 22.05 | 31.7 CD2_FlexII      | 97.9 GRKPOQIPASTPONPATSOHPPPPPGHR  | Label:13C(6)15N(4)(R) @2; Label:13C(6)15N(2)(K) @3; Deamidated(N) @14; Label:13C(6)15N(4)(R) @28                     | 0.00625205  | 3006.56128 | 602.3195 | 3006.55298 | 602.317871 | 5 | 11 | 14.2882 | 11.54 |
| 74 | 19.77 | 22.05 | 31.7 CD2_FlexII      | 97.9 GRKPOQIPASTPONPATSOHPPPPPGHR  | Label:13C(6)15N(4)(R) @2; Label:13C(6)15N(2)(K) @3; Deamidated(N) @14; Label:13C(6)15N(4)(R) @28                     | 0.00825205  | 3006.56128 | 602.3195 | 3006.55298 | 602.317871 | 5 | 11 | 14.5473 | 11.54 |
| 74 | 19.77 | 22.05 | 31.7 CD2_FlexII      | 97.9 RPPAPSGTQVHQQK                | Label:13C(6)15N(4)(R) @1; Label:13C(6)15N(2)(K) @14                                                                  | 0.00038946  | 1547.82935 | 387.9646 | 1547.82874 | 387.964447 | 4 | 10 | 8.8743  | 11.54 |
| 74 | 19.77 | 22.05 | 31.7 CD2_FlexII      | 97.9 VQHQPQKRPPAPSGTQVHQQK         | Label:13C(6)15N(2)(K) @7; Label:13C(6)15N(4)(R) @8; Label:13C(6)15N(2)(K) @21                                        | -0.00461985 | 2401.28906 | 601.3295 | 2401.2937  | 601.330689 | 4 | 9  | 8.7097  | 11.54 |
| 9  | 54.6  | 56.93 | 78.8 MAT1A_FlexII    | 97.9 RSGLLPWLVRPDSK                | Label:13C(6)15N(4)(R) @1; Label:13C(6)15N(4)(R) @9; Label:13C(6)15N(2)(K) @13                                        | -0.00794631 | 1551.88001 | 518.3006 | 1551.88794 | 518.303284 | 3 | 11 | 17.9616 | 26.98 |
| 18 | 48.12 | 50.3  | 76.2 EVL_FlexII      | 97.9 SPLOSOPHSR                    | Label:13C(6)15N(4)(R) @10                                                                                            | 0.00740692  | 1145.58911 | 382.8703 | 1145.58167 | 382.867828 | 3 | 8  | 10.7671 | 16.66 |
| 42 | 38.57 | 40.97 | 55.8 MAPKAPK3_FlexII | 97.9 DIGTAIOFLGSHNIAHRDVKPENLLYTSK | Deamidated(N) @13; Label:13C(6)15N(4)(R) @17; Label:13C(6)15N(2)(K) @20; Label:13C(6)15N(2)(K) @29                   | 0.0179197   | 3343.77026 | 836.9498 | 3343.75244 | 836.945374 | 4 | 11 | 18.1718 | 15.68 |
| 5  | 59.76 | 61.76 | 81.6 2-SEP_FlexII    | 97.9 TLLWEKIER                     | Label:13C(6)15N(2)(K) @6; Label:13C(6)15N(4)(R) @9                                                                   | -0.00959597 | 1204.6875  | 402.5698 | 1204.69348 | 402.571777 | 3 | 9  | 17.7112 | NA    |
| 61 | 26.19 | 28.33 | 39.3 CEACAM1_FlexII  | 97.9 TIIVTELSPVVAKPQIK             | Label:13C(6)15N(2)(K) @13; Label:13C(6)15N(2)(K) @17                                                                 | -0.010962   | 1851.13049 | 618.0508 | 1851.1416  | 618.054443 | 3 | 10 | 18.8091 | 25.32 |
| 51 | 32.48 | 34.57 | 50.0 WNT2_FlexII     | 97.8 VMCDNVPLGVSSQR                | Oxidation(M) @2; Propionamide(C) @3; Deamidated(N) @5; Label:13C(6)15N(4)(R) @14                                     | 0.00199028  | 1601.74365 | 801.8791 | 1601.74417 | 801.878113 | 2 | 10 | 16.4375 | 11.83 |
| 80 | 18    | 20    | 26.9 PSEN1_FlexII    | 97.8 SLGHPEPLSNRPGQNSR             | Label:13C(6)15N(4)(R) @12; Label:13C(6)15N(4)(R) @18                                                                 | -0.00340115 | 1921.95886 | 641.6602 | 1921.96216 | 641.661636 | 3 | 10 | 14.0676 | 27.70 |
| 2  | 66.54 | 68.54 | 65.5 FZR1_FlexII     | 97.8 TLTPASSPVSSPSK                | Label:13C(6)15N(2)(K) @14                                                                                            | 0.00501437  | 1365.72815 | 456.25   | 1365.72315 | 456.248322 | 3 | 10 | 14.628  | 12.66 |
| 14 | 50.19 | 52.2  | 65.0 HIF1AN_FlexII   | 97.8 CILFPDQFECLYPYVPHHPCDR        | Propionamide(C) @1; Deamidated(Q) @8; Propionamide(C) @11; Propionamide(C) @21                                       | 0.0138792   | 3002.36939 | 751.5996 | 3002.35547 | 751.59613  | 4 | 11 | 19.3727 | 25.53 |
| 9  | 54.6  | 56.93 | 78.8 MAT1A_FlexII    | 97.8 IIVDTYGGWGAHGGGAFSGK          | Label:13C(6)15N(2)(K) @20                                                                                            | 0.0122241   | 1956.96936 | 653.3304 | 1956.9574  | 653.326416 | 3 | 11 | 19.0173 | 26.98 |
| 9  | 54.6  | 56.93 | 78.8 MAT1A_FlexII    | 97.8 TQTVTYQMNDNGAVIPVR            | Label:13C(6)15N(4)(R) @18                                                                                            | -0.0543413  | 2027.97949 | 677.0004 | 2028.03381 | 677.018555 | 3 | 11 | 18.8798 | 26.98 |
| 9  | 54.6  | 56.93 | 78.8 MAT1A_FlexII    | 97.8 TQTVTYQMNDNGAVIPVR            | Label:13C(6)15N(4)(R) @18                                                                                            | -0.0543413  | 2027.97949 | 677.0004 | 2028.03381 | 677.018555 | 3 | 11 | 19.9435 | 26.98 |
| 9  | 54.6  | 56.93 | 78.8 MAT1A_FlexII    | 97.8 TQTVTYQMNDNGAVIPVR            | Label:13C(6)15N(4)(R) @18                                                                                            | -0.0373125  | 2027.99646 | 677.0061 | 2028.03381 | 677.018555 | 3 | 11 | 26.5355 | 26.98 |
| 46 | 36.36 | 38.64 | 86.3 HOXC11_FlexII   | 97.8 MLNLTDR                       | Oxidation(M) @1; Label:13C(6)15N(4)(R) @7                                                                            | 0.00056651  | 887.44165  | 444.7281 | 887.44104  | 444.727783 | 2 | 9  | 15.6044 | 3.80  |
| 47 | 36.2  | 38.23 | 36.2 WAS_FlexII      | 97.8 LEMLGR                        | Label:13C(6)15N(4)(R) @7                                                                                             | -0.00055043 | 874.460449 | 438.2375 | 874.460999 | 438.237793 | 2 | 8  | 18.1565 | 11.23 |
| 29 | 42.79 | 44.97 | 59.5 PBK_FlexII      | 97.8 SLNDJIEER                     |                                                                                                                      | 1.83E-05    | 1087.55103 | 544.7828 | 1087.55509 | 544.782776 | 2 | 10 | 17.5093 | 17.23 |
| 36 | 40.58 | 42.7  | 45.4 CSNK1D_FlexII   | 97.8 THQHIPPYRENK                  | Label:13C(6)15N(4)(R) @8; Label:13C(6)15N(2)(K) @11                                                                  | 0.00627474  | 1439.74512 | 720.8798 | 1439.73889 | 720.876709 | 2 | 8  | 9.2889  | 14.60 |
| 17 | 48.68 | 50.69 | 56.7 PRKACG_FlexII   | 97.7 VEAPFIPK                      | Label:13C(6)15N(2)(K) @8                                                                                             | -0.00074474 | 907.525085 | 454.7698 | 907.525879 | 454.770203 | 2 | 9  | 17.3423 | 16.57 |
| 5  | 59.76 | 61.76 | 81.6 2-SEP_FlexII    | 97.7 ADTLTLK                       | Label:13C(6)15N(2)(K) @7                                                                                             | -0.00221648 | 768.445068 | 385.2298 | 768.447266 | 385.230896 | 2 | 8  | 15.5041 | NA    |
| 76 | 18.62 | 20.7  | 20.8 TNFRSF1A_FlexII | 97.7 RLGLSDHEIDR                   | Label:13C(6)15N(4)(R) @1; Label:13C(6)15N(4)(R) @11                                                                  | 0.0067516   | 1329.69727 | 444.2397 | 1329.69043 | 444.237396 | 3 | 9  | 15.0168 | 1.24  |
| 26 | 44    | 46.07 | 49.5 ORC4L_FlexII    | 97.7 TMLNHALK                      | Label:13C(6)15N(2)(K) @9                                                                                             | 0.0061587   | 1047.60523 | 524.8099 | 1047.599   | 524.806824 | 2 | 9  | 15.8987 | 13.72 |
| 44 | 37.29 | 39.32 | 43.8 GMCL1_FlexII    | 97.7 DGEYCYWR                      | Propionamide(C) @5; Label:13C(6)15N(4)(R) @7                                                                         | 0.00011258  | 1008.40009 | 505.2073 | 1008.3999  | 505.207214 | 2 | 8  | 16.2413 | 3.65  |
| 61 | 26.19 | 28.33 | 39.3 CEACAM1_FlexII  | 97.7 QIVGYAIGTQQTTPGANSGR          | Label:13C(6)15N(4)(R) @21                                                                                            | 0.00067952  | 2095.06934 | 699.3637 | 2095.0686  | 699.363464 | 3 | 10 | 16.4515 | 25.32 |
| 14 | 50.19 | 52.2  | 65.0 HIF1AN_FlexII   | 97.6 LYLQOTLNDTVGR                 | Deamidated(Q) @5; Label:13C(6)15N(4)(R) @13                                                                          | 0.0128926   | 1530.80469 | 766.4096 | 1530.79175 | 766.403137 | 2 | 8  | 26.5025 | 25.53 |
| 14 | 50.19 | 52.2  | 65.0 HIF1AN_FlexII   | 97.6 RIEVPLKXHQK                   | Label:13C(6)15N(4)(R) @1; Label:13C(6)15N(2)(K) @7; Label:13C(6)15N(2)(K) @11                                        | -0.0109208  | 1407.80896 | 352.9595 | 1407.8197  | 352.962189 | 4 | 9  | 13.8653 | 25.53 |
| 14 | 50.19 | 52.2  | 65.0 HIF1AN_FlexII   | 97.6 SNREEMKFHEFVEK                | Label:13C(6)15N(4)(R) @3; Oxidation(M) @6; Label:13C(6)15N(2)(K) @7; Label:13C(6)15N(2)(K) @14                       | 0.00584707  | 1850.88892 | 463.7295 | 1850.88318 | 463.728058 | 4 | 10 | 15.2131 | 25.53 |
| 24 | 45.3  | 47.31 | 60.7 WNT7A_FlexII    | 97.6 IKKPLSLYR                     | Label:13C(6)15N(2)(K) @2; Label:13C(6)15N(2)(K) @3; Label:13C(6)15N(4)(R) @8                                         | 0.013715    | 1029.66821 | 344.23   | 1029.65454 | 344.225464 | 3 | 7  | 13.689  | 13.38 |
| 24 | 45.3  | 47.31 | 60.7 WNT7A_FlexII    | 97.6 KPMDTLVDYIEK                  | Label:13C(6)15N(2)(K) @1; Oxidation(M) @3; Label:13C(6)15N(2)(K) @12                                                 | -0.00341425 | 1482.75757 | 495.2598 | 1482.76111 | 495.260956 | 3 | 10 | 16.4598 | 13.38 |
| 31 | 41.62 | 43.81 | 59.6 LIMS1_FlexII    | 97.6 MGVPICGACR                    | Propionamide(C) @6; Propionamide(C) @9; Label:13C(6)15N(4)(R) @10                                                    | -0.012148   | 1157.52625 | 579.7704 | 1157.53833 | 579.776428 | 2 | 9  | 17.192  | 4.68  |
| 17 | 48.68 | 50.69 | 56.7 PRKACG_FlexII   | 97.6 QVEHILNEKR                    | Label:13C(6)15N(2)(K) @9; Label:13C(6)15N(4)(R) @10                                                                  | 0.00077868  | 1282.71191 | 428.5779 | 1282.71193 | 428.577698 | 3 | 9  | 13.8625 | 16.57 |
| 9  | 54.6  | 56.93 | 78.8 MAT1A_FlexII    | 97.6 IHITIVSQHNEDITLEEMRR          | Label:13C(6)15N(4)(R) @20; Label:13C(6)15N(4)(R) @21                                                                 | 0.00083776  | 2552.32935 | 639.0896 | 2552.32837 | 639.089356 | 4 | 11 | 17.342  | 26.98 |
| 22 | 45.72 | 47.76 | 72.9 BCKDK_FlexII    | 97.6 STSATDTHHVEMAR                | Label:13C(6)15N(4)(R) @14                                                                                            | 0.00095078  | 1551.69849 | 388.9319 | 1551.69751 | 388.931671 | 4 | 10 | 12.9881 | 2.26  |
| 6  | 58.66 | 60.67 | 85.0 ARRB1_FlexII    | 97.6 LTVVLGK                       | Label:13C(6)15N(2)(K) @7                                                                                             | -0.00256688 | 800.486267 | 401.2504 | 800.48877  | 401.251648 | 2 | 8  | 16.7678 | 14.62 |
| 79 | 18.05 | 20.06 | 32.5 ETV5_FlexII     | 97.5 VKQEPMTYR                     | Label:13C(6)15N(2)(K) @2; Label:13C(6)15N(4)(R) @9                                                                   | -0.00374822 | 1168.59912 | 390.5403 | 1168.60291 | 390.541596 | 3 | 9  | 13.8734 | 1.82  |
| 29 | 42.79 | 44.97 | 59.5 PBK_FlexII      | 97.5 SVLCSPTPTINIPASPFMQK          | Propionamide(C) @4; Deamidated(N) @10; Label:13C(6)15N(2)(K) @19                                                     | 0.0211133   | 2113.08936 | 1057.552 | 2113.06787 | 1057.54126 | 2 | 11 | 19.7449 | 17.23 |
| 16 | 48.74 | 50.75 | 67.3 CAMK2B_FlexII   | 97.4 FYFENLLAK                     | Label:13C(6)15N(2)(K) @9                                                                                             | -0.00106115 | 1151.60962 | 578.8121 |            |            |   |    |         |       |

|    |       |       |                       |                              |                                                                                                      |             |            |          |            |            |   |    |         |       |
|----|-------|-------|-----------------------|------------------------------|------------------------------------------------------------------------------------------------------|-------------|------------|----------|------------|------------|---|----|---------|-------|
| 38 | 40.23 | 42.26 | 57.4 CDK4_FlexII      | 97.4 VTLVFEHVDQDLR           | Label:13C(6)15N(4)(R)@13                                                                             | 0.015592    | 1579.83875 | 527.6202 | 1579.82336 | 527.615051 | 3 | 8  | 22.676  | 14.73 |
| 11 | 52.74 | 54.75 | 70.6 HOXC10_FlexII    | 97.3 TINLTDR                 |                                                                                                      | -0.00256094 | 831.442444 | 416.7285 | 831.445007 | 416.729797 | 2 | 8  | 15.5674 | 7.09  |
| 9  | 54.6  | 56.93 | 78.8 MAT1A_FlexII     | 97.3 VACETVCK                | Propionamide(C)@3; Propionamide(C)@7; Label:13C(6)15N(2)(K)@8                                        | 0.00125095  | 1001.47784 | 501.7462 | 1001.47656 | 501.745544 | 2 | 10 | 12.9904 | 26.98 |
| 9  | 54.6  | 56.93 | 78.8 MAT1A_FlexII     | 97.3 VACETVCK                | Propionamide(C)@3; Propionamide(C)@7; Label:13C(6)15N(2)(K)@8                                        | 0.00241062  | 1001.47907 | 501.7468 | 1001.47656 | 501.745544 | 2 | 10 | 13.5235 | 26.98 |
| 14 | 50.19 | 52.2  | 65.0 HIF1A1_FlexII    | 97.3 IEYPLK                  | Label:13C(6)15N(2)(K)@6                                                                              | -0.00209603 | 769.444458 | 385.7295 | 769.446533 | 385.73056  | 2 | 8  | 16.27   | 25.53 |
| 24 | 45.3  | 47.31 | 60.7 WNT7A_FlexII     | 97.3 TLMNLHNEAGRK            | Label:13C(6)15N(4)(R)@12; Label:13C(6)15N(2)(K)@13                                                   | -9.62E-05   | 1514.77417 | 505.932  | 1514.77429 | 505.932037 | 3 | 9  | 14.3795 | 13.38 |
| 1  | 72.1  | 72.1  | 60.4 RNF8_FlexII      | 97.3 SLNGVVLNR               | Deamidated(N)@3; Label:13C(6)15N(4)(R)@9                                                             | 0.0019793   | 1068.56104 | 535.2878 | 1068.5592  | 535.286865 | 2 | 10 | 18.1164 | 17.06 |
| 16 | 48.74 | 50.75 | 67.3 CAMK2B_FlexII    | 97.3 QETVEOLK                | Gln->pyro-Glu@N-term; Propionamide(C)@6; Label:13C(6)15N(2)(K)@8                                     | -0.00202689 | 1010.48328 | 506.2489 | 1010.4834  | 506.248962 | 2 | 9  | 16.0645 | 20.90 |
| 60 | 26.43 | 28.47 | 59.7 FCRLA_FlexII     | 97.3 EFSITVVQK               | Label:13C(6)15N(2)(K)@9                                                                              | 0.00066242  | 1057.5907  | 529.8026 | 1057.58997 | 529.802246 | 2 | 8  | 17.5794 | 41.77 |
| 60 | 26.43 | 28.47 | 59.7 FCRLA_FlexII     | 97.3 EFSITVVQK               | Label:13C(6)15N(2)(K)@9                                                                              | -0.00153484 | 1057.5885  | 529.8015 | 1057.58997 | 529.802246 | 2 | 7  | 26.4062 | 41.77 |
| 60 | 26.43 | 28.47 | 59.7 FCRLA_FlexII     | 97.3 LLFSFYK                 | Label:13C(6)15N(2)(K)@7                                                                              | 0.00495223  | 924.525085 | 463.2698 | 924.52002  | 463.267304 | 2 | 7  | 22.5972 | 41.77 |
| 29 | 42.79 | 44.97 | 59.5 PBK_FlexII       | 97.3 SLNDLIEER               | Label:13C(6)15N(4)(R)@9                                                                              | 0.0071549   | 1097.56653 | 549.7905 | 1097.5592  | 549.786865 | 2 | 9  | 21.7979 | 17.23 |
| 42 | 38.57 | 40.97 | 55.8 MAPKAPK3_FlexII  | 97.2 LTDFGFAK                | Label:13C(6)15N(2)(K)@8                                                                              | -0.0038513  | 905.47345  | 453.744  | 905.473816 | 453.744171 | 2 | 9  | 17.5166 | 15.68 |
| 10 | 53.11 | 55.13 | 57.4 TP53_FlexII      | 97.1 AMAIYK                  | Label:13C(6)15N(2)(K)@6                                                                              | 0.00387364  | 703.385681 | 352.7001 | 703.381836 | 352.698181 | 2 | 7  | 15.5793 | 9.55  |
| 33 | 41.31 | 43.51 | 73.9 CDCA7_FlexII     | 97.1 VAMKFPAR                | Label:13C(6)15N(2)(K)@4; Label:13C(6)15N(4)(R)@8                                                     | -0.00167896 | 936.531677 | 313.1845 | 936.533386 | 313.185089 | 3 | 8  | 15.7176 | 7.86  |
| 2  | 66.54 | 68.54 | 65.5 FZR1_FlexII      | 97.0 RLOGHQRVEVGLK           | Label:13C(6)15N(4)(R)@1; Label:13C(6)15N(4)(R)@6; Propionamide(C)@10; Label:13C(6)15N(2)(K)@13       | 0.0076705   | 1621.8905  | 406.4799 | 1621.88294 | 406.477997 | 4 | 9  | 13.4253 | 12.66 |
| 42 | 38.57 | 40.97 | 55.8 MAPKAPK3_FlexII  | 97.0 DIGTAQIFLHSHNIAHR       | Label:13C(6)15N(4)(R)@17                                                                             | -0.00751402 | 1938.99756 | 647.3398 | 1939.00525 | 647.342346 | 3 | 9  | 21.2903 | 15.68 |
| 52 | 31.37 | 33.43 | 67.9 MMP28_FlexII     | 97.0 ISDLFAR                 | Label:13C(6)15N(4)(R)@7                                                                              | -0.00784461 | 830.444702 | 416.2296 | 830.452576 | 416.233551 | 2 | 8  | 17.3232 | 2.09  |
| 33 | 41.31 | 43.51 | 73.9 CDCA7_FlexII     | 97.0 TFPGVASR                | Label:13C(6)15N(4)(R)@8                                                                              | -0.00085937 | 843.446899 | 422.7307 | 843.447815 | 422.731201 | 2 | 7  | 15.9563 | 7.86  |
| 51 | 32.48 | 34.57 | 50.0 WNT2_FlexII      | 97.0 ALMNLHNNR               | Label:13C(6)15N(4)(R)@9                                                                              | 0.000248    | 1091.55371 | 546.7841 | 1091.55335 | 546.783936 | 2 | 9  | 14.9798 | 11.83 |
| 73 | 20.3  | 23.6  | 44.5 TNFRSF10B_FlexII | 97.0 VGDCPTPWSDIECVHK        | Propionamide(C)@4; Propionamide(C)@12; Label:13C(6)15N(2)(K)@15                                      | 0.00563072  | 1837.82752 | 919.921  | 1837.8219  | 919.918213 | 2 | 10 | 17.4968 | 34.27 |
| 16 | 48.74 | 50.75 | 67.3 CAMK2B_FlexII    | 97.0 NLINQMLTINPAK           | Deamidated(N)@4; Label:13C(6)15N(2)(K)@13                                                            | 0.0201268   | 1477.82544 | 739.92   | 1477.80542 | 739.909973 | 2 | 10 | 19.3061 | 20.90 |
| 1  | 72.1  | 72.1  | 60.4 RNF8_FlexII      | 97.0 GEVASTPSSDNLDPK         | Label:13C(6)15N(2)(K)@14                                                                             | -0.00055633 | 1436.68689 | 719.3507 | 1436.6875  | 719.351013 | 2 | 10 | 15.2556 | 17.06 |
| 1  | 72.1  | 72.1  | 60.4 RNF8_FlexII      | 97.1 ICPLMISR                | Propionamide(C)@2; Label:13C(6)15N(4)(R)@8                                                           | 0.00119102  | 1012.54486 | 507.2797 | 1012.5437  | 507.279144 | 2 | 9  | 17.3287 | 17.06 |
| 1  | 72.1  | 72.1  | 60.4 RNF8_FlexII      | 97.0 IQMQEKHEAVMNVK          | Label:13C(6)15N(2)(K)@6; Label:13C(6)15N(2)(K)@14                                                    | 0.0005793   | 1699.87256 | 425.9754 | 1699.87207 | 425.975281 | 4 | 10 | 14.6229 | 17.06 |
| 1  | 72.1  | 72.1  | 60.4 RNF8_FlexII      | 97.0 KIECPICR                | Label:13C(6)15N(2)(K)@1; Propionamide(C)@4; Propionamide(C)@7; Label:13C(6)15N(4)(R)@8               | 0.00228431  | 1120.5874  | 374.5364 | 1120.58521 | 374.53675  | 3 | 9  | 14.7266 | 17.06 |
| 1  | 72.1  | 72.1  | 60.4 RNF8_FlexII      | 97.0 VSCESGQPVK              | Propionamide(C)@3; Label:13C(6)15N(2)(K)@10                                                          | 0.00125797  | 1111.5437  | 556.7791 | 1111.54236 | 556.778442 | 2 | 9  | 10.5414 | 17.06 |
| 48 | 36.13 | 38.14 | 49.0 TNFRSF10A_FlexII | 96.9 NTACQCKPGTFR            | Propionamide(C)@4; Propionamide(C)@6; Label:13C(6)15N(2)(K)@7; Label:13C(6)15N(4)(R)@12              | -7.65E-05   | 1484.69824 | 495.9067 | 1484.69836 | 495.906708 | 3 | 9  | 13.8746 | 12.24 |
| 10 | 53.11 | 55.13 | 57.4 TP53_FlexII      | 96.9 TEEENLR                 | Label:13C(6)15N(4)(R)@7                                                                              | 0.00329488  | 899.425659 | 450.7201 | 899.422363 | 450.718475 | 2 | 7  | 12.1266 | 9.55  |
| 9  | 54.6  | 56.93 | 78.8 MAT1A_FlexII     | 96.9 SEFFPWEVPR              | Label:13C(6)15N(4)(R)@9                                                                              | -0.00208342 | 1155.55664 | 578.7856 | 1155.55684 | 578.786682 | 2 | 10 | 18.6249 | 26.98 |
| 44 | 37.29 | 39.32 | 43.8 GMCL1_FlexII     | 96.9 QQWFAMLR                | Label:13C(6)15N(4)(R)@8                                                                              | 0.00012752  | 1088.54663 | 545.2806 | 1088.54651 | 545.280518 | 2 | 8  | 19.1736 | 3.65  |
| 17 | 48.68 | 50.69 | 56.7 PRKACG_FlexII    | 96.8 DTEQESVNEFLAK           | Deamidated(Q)@4; Label:13C(6)15N(2)(K)@14                                                            | 0.00794309  | 1646.74829 | 824.3814 | 1646.74023 | 824.377441 | 2 | 9  | 21.7351 | 16.57 |
| 25 | 44.51 | 46.56 | 50.8 CDK7_FlexII      | 96.8 APELLFGAR               | Label:13C(6)15N(4)(R)@9                                                                              | -0.00014722 | 982.547485 | 492.281  | 982.547546 | 492.281036 | 2 | 9  | 20.1286 | 10.08 |
| 1  | 72.1  | 72.1  | 60.4 RNF8_FlexII      | 96.8 SLNGVVLNR               | Deamidated(N)@3; Label:13C(6)15N(4)(R)@9                                                             | -0.00082831 | 1068.55823 | 535.2864 | 1068.5592  | 535.286865 | 2 | 10 | 17.5708 | 17.06 |
| 1  | 72.1  | 72.1  | 60.4 RNF8_FlexII      | 96.8 VSCESGQPVK              | Propionamide(C)@3; Label:13C(6)15N(2)(K)@10                                                          | 0.00601871  | 1111.54822 | 556.7814 | 1111.54236 | 556.778442 | 2 | 8  | 11.0641 | 17.06 |
| 48 | 36.13 | 38.14 | 49.0 TNFRSF10A_FlexII | 96.8 DCTPWSDIECVHK           | Propionamide(C)@2; Propionamide(C)@10; Label:13C(6)15N(2)(K)@13                                      | -0.0135725  | 1681.71838 | 561.5801 | 1681.73193 | 561.584595 | 3 | 9  | 17.4694 | 12.24 |
| 73 | 20.3  | 23.6  | 44.5 TNFRSF10B_FlexII | 96.8 DCTPWSDIECVHK           | Propionamide(C)@2; Propionamide(C)@10; Label:13C(6)15N(2)(K)@13                                      | -0.0135725  | 1681.71838 | 561.5801 | 1681.73193 | 561.584595 | 3 | 9  | 17.4694 | 34.27 |
| 38 | 40.23 | 42.26 | 57.4 CDK4_FlexII      | 96.8 LMDVCATSR               | Propionamide(C)@5; Label:13C(6)15N(4)(R)@9                                                           | 0.00241809  | 1075.50525 | 538.7599 | 1075.50293 | 538.758789 | 2 | 7  | 21.4958 | 14.73 |
| 38 | 40.23 | 42.26 | 57.4 CDK4_FlexII      | 96.8 VTLVFEHVDQDLR           | Label:13C(6)15N(4)(R)@13                                                                             | -0.0144373  | 1579.80884 | 527.6102 | 1579.82336 | 527.615051 | 3 | 9  | 19.9968 | 14.73 |
| 10 | 53.11 | 55.13 | 57.4 TP53_FlexII      | 96.8 IGLHSGTAK               | Label:13C(6)15N(2)(K)@10                                                                             | -0.0143744  | 1037.57349 | 346.8651 | 1037.57495 | 346.865601 | 3 | 8  | 16.2009 | 9.55  |
| 14 | 50.19 | 52.2  | 65.0 HIF1A1_FlexII    | 96.8 CILFPDQKFECLYPYPVHHPCDR | Propionamide(C)@1; Deamidated(Q)@8; Propionamide(C)@11; Propionamide(C)@21; Label:13C(6)15N(4)(R)@23 | 0.0456529   | 3012.40942 | 754.1096 | 3012.36353 | 754.098206 | 4 | 7  | 26.8409 | 25.53 |
| 42 | 38.57 | 40.97 | 55.8 MAPKAPK3_FlexII  | 96.7 EAAEIMR                 | Label:13C(6)15N(4)(R)@7                                                                              | -0.00303652 | 828.403687 | 415.2091 | 828.403931 | 415.209229 | 2 | 8  | 14.6707 | 15.68 |
| 74 | 19.77 | 22.05 | 31.7 CD2_FlexII       | 96.7 VQHQPQKRPPAPSGTQVHQKQ   | Label:13C(6)15N(2)(K)@7; Label:13C(6)15N(4)(R)@8; Label:13C(6)15N(2)(K)@21                           | -0.00461985 | 2401.28906 | 601.3295 | 2401.2937  | 601.330689 | 4 | 10 | 9.7736  | 11.54 |
| 74 | 19.77 | 22.05 | 31.7 CD2_FlexII       | 96.7 VQHQPQKRPPAPSGTQVHQKQ   | Label:13C(6)15N(2)(K)@7; Label:13C(6)15N(4)(R)@8; Label:13C(6)15N(2)(K)@21                           | 0.0187083   | 2401.31274 | 481.2698 | 2401.2937  | 481.266022 | 5 | 10 | 9.7953  | 11.54 |
| 1  | 72.1  | 72.1  | 60.4 RNF8_FlexII      | 96.7 VSCESGQPVK              | Propionamide(C)@3; Label:13C(6)15N(2)(K)@10                                                          | 0.00467594  | 1111.54712 | 556.7808 | 1111.54236 | 556.778442 | 2 | 8  | 10.2857 | 17.06 |
| 2  | 66.54 | 68.54 | 65.5 FZR1_FlexII      | 96.6 LSMLEIGHTAR             | Label:13C(6)15N(4)(R)@10                                                                             | -0.00058014 | 1123.56787 | 375.5299 | 1123.56836 | 375.53006  | 3 | 9  | 15.4259 | 12.66 |
| 46 | 36.36 | 38.64 | 86.3 HOXC11_FlexII    | 96.6 NSYSSCYAAADELMHR        | Deamidated(N)@1; Propionamide(C)@6; Label:13C(6)15N(4)(R)@16                                         | 0.0173115   | 1898.79761 | 633.9398 | 1898.78027 | 633.934021 | 3 | 9  | 21.3    | 3.80  |
| 43 | 38.44 | 40.47 | 30.1 ARPC1B_FlexII    | 96.6 IVTCGTDR                | Propionamide(C)@4; Label:13C(6)15N(4)(R)@8                                                           | -0.00010123 | 944.462463 | 473.2385 | 944.462463 | 473.238525 | 2 | 8  | 11.6628 | 4.64  |
| 19 | 47.69 | 49.71 | 41.5 NUF2_FlexII      | 96.6 SQEILNLK                | Label:13C(6)15N(2)(K)@9                                                                              | -0.00866057 | 1098.60791 | 550.3112 | 1098.61646 | 550.315491 | 2 | 9  | 18.2153 | 8.30  |
| 25 | 44.51 | 46.56 | 50.8 CDK7_FlexII      | 96.6 APELLFGAR               | Label:13C(6)15N(4)(R)@9                                                                              | -0.00014722 | 982.547485 | 492.281  | 982.547546 | 492.281036 | 2 | 8  | 20.9632 | 10.08 |
| 51 | 32.48 | 34.57 | 50.0 WNT2_FlexII      | 96.6 ALMNLHNNR               | Label:13C(6)15N(4)(R)@9                                                                              | -0.0082969  | 1091.54504 | 546.7798 | 1091.55335 | 546.783936 | 2 | 9  | 15.2545 | 11.83 |
| 1  | 72.1  | 72.1  | 60.4 RNF8_FlexII      | 96.6 ARLEPR                  | Label:13C(6)15N(4)(R)@2; Label:13C(6)15N(4)(R)@7                                                     | -0.00303401 | 873.528856 | 437.7707 | 873.529097 | 437.772247 | 2 | 9  | 14.514  | 17.06 |
| 14 | 50.19 | 52.2  | 65.0 HIF1A1_FlexII    | 96.6 MANFQNFKPR              | Label:13C(6)15N(2)(K)@8; Label:13C(6)15N(4)(R)@10                                                    | -0.00258725 | 1269.63818 | 424.22   | 1269.64075 | 424.220656 | 3 | 9  | 16.5497 | 25.53 |
| 5  | 59.76 | 61.76 | 81.6 2-SEP_FlexII     | 96.6 MOEMIR                  | Label:13C(6)15N(4)(R)@7                                                                              | -0.00017685 | 887.423096 | 444.7188 | 887.423279 | 444.718903 | 2 | 8  | 15.0429 | NA    |
| 16 | 48.74 | 50.75 | 67.3 CAMK2B_FlexII    | 96.5 FTDEQLYEDIGK            | Deamidated(Q)@6; Label:13C(6)15N(2)(K)@13                                                            | 0.0118924   | 1628.74573 | 815.3801 | 1628.73377 | 815.374146 | 2 | 10 | 18.1306 | 20.90 |
| 16 | 48.74 | 50.75 | 67.3 CAMK2B_FlexII    | 96.5 GAILTTMLATR             | Label:13C(6)15N(4)(R)@11                                                                             | -0.00064173 | 1156.65064 | 386.5575 | 1156.65137 | 386.557739 | 3 | 9  | 17.8297 | 20.90 |
| 16 | 48.74 | 50.75 | 67.3 CAMK2B_FlexII    | 96.5 QETVEOLK                | Propionamide(C)@6; Label:13C(6)15N(2)(K)@8                                                           | -0.00453288 | 1027.50549 | 514.76   | 1027.50989 | 514.762268 | 2 | 9  | 14.7389 | 20.90 |
| 2  | 66.54 | 68.54 | 65.5 FZR1_FlexII      | 96.5 VODPQTEDR               | Label:13C(6)15N(4)(R)@9                                                                              | 0.00327134  | 1096.50562 | 549.2601 | 1096.50244 | 549.258484 | 2 | 7  | 9.5068  | 12.66 |
| 22 | 45.72 | 47.76 | 72.9 BCKDK_FlexII     | 96.5 STSATDTHVEMAR           | Label:13C(6)15N(4)(R)@14                                                                             | 0.0016832   | 1551.69934 | 388.9321 | 1551.69751 | 388.931671 | 4 | 10 | 12.4438 | 2.26  |
| 49 | 33.63 | 37.69 | 49.1 TDG_FlexII       | 96.5 LKDLRDQLK               | Label:13C(6)15N(2)(K)@2; Label:13C(6)15N(4)(R)@5; Label:13C(6)15N(2)(K)@9                            | -0.0148787  | 1153.88787 | 385.5699 | 1153.70288 | 385.574921 | 3 | 9  | 14.9354 | 7.02  |
| 14 | 50.19 | 52.2  | 65.0 HIF1A1_FlexII    | 96.4 KMANFQNFKPR             | Label:13C(6)15N(2)(K)@1; Label:13C(6)15N(2)(K)@9; Label:13C(6)15N(4)(R)@11                           | -0.0210834  | 1405.729   | 352.4395 | 1405.74988 | 352.444763 | 4 | 9  | 15.8785 | 25.53 |
| 4  | 62.05 | 64.05 | 56.1 CDC25C_FlexII    | 96.4 QLREQIALLVK             | Label:13C(6)15N(4)(R)@3; Label:13C(6)15N(2)(K)@11                                                    | -0.00129399 | 1327.82947 | 443.6171 | 1327.830   |            |   |    |         |       |

|    |       |       |                     |                                     |                                                                                                         |                                 |             |            |          |            |            |   |    |            |       |
|----|-------|-------|---------------------|-------------------------------------|---------------------------------------------------------------------------------------------------------|---------------------------------|-------------|------------|----------|------------|------------|---|----|------------|-------|
| 22 | 45.72 | 47.76 | 72.9 BCKDK_FlexII   | 96.2 KHIEDEKLYR                     | Label: 13C(6)15N(2)(K) @ 1; Label: 13C(6)15N(2)(K) @ 7; Label: 13C(6)15N(4)(R) @ 10                     | missed K-H @ 1; missed K-L @ 7  | -0.0120166  | 1291.73377 | 323.9407 | 1291.74585 | 323.943726 | 4 | 9  | 12.4504    | 2.26  |
| 22 | 45.72 | 47.76 | 72.9 BCKDK_FlexII   | 96.2 STSATDTHHVMEMAR                | Oxidation(M) @ 12; Label: 13C(6)15N(4)(R) @ 14                                                          |                                 | 0.0017642   | 1567.69421 | 523.572  | 1567.69238 | 523.571411 | 3 | 10 | 7.8733     | 2.26  |
| 29 | 42.79 | 44.97 | 59.5 PBK_FlexII     | 96.2 SLHHPNIVGYR                    | Label: 13C(6)15N(4)(R) @ 11                                                                             |                                 | 0.00036709  | 1301.68726 | 434.903  | 1301.68677 | 434.902893 | 3 | 8  | 23.5903    | 17.23 |
| 29 | 42.79 | 44.97 | 59.5 PBK_FlexII     | 96.2 SLNDLIEER                      | Deamidated(N) @ 3; Label: 13C(6)15N(4)(R) @ 9                                                           |                                 | -0.00066199 | 1098.54273 | 550.2786 | 1098.54321 | 550.27687  | 2 | 10 | 16.8452    | 17.23 |
| 1  | 72.1  | 72.1  | 60.4 RNFB_FlexII    | 96.2 MVNLSSEVKER                    | Deamidated(N) @ 4; Label: 13C(6)15N(2)(K) @ 10; Label: 13C(6)15N(4)(R) @ 12                             | missed K-E @ 10                 | 0.00414484  | 1423.71362 | 475.5785 | 1423.7096  | 475.577148 | 3 | 10 | 15.2664    | 17.06 |
| 51 | 32.48 | 34.57 | 50.0 WNT2_FlexII    | 96.1 ALMLNHNHR                      | Label: 13C(6)15N(4)(R) @ 11                                                                             |                                 | 0.00109674  | 1081.54627 | 541.7804 | 1081.54504 | 541.779846 | 2 | 9  | 15.0063    | 11.83 |
| 36 | 40.58 | 42.7  | 45.4 CSNK1D_FlexII  | 96.2 THQHIPPYRENK                   | Deamidated(Q) @ 3; Label: 13C(6)15N(4)(R) @ 8; Label: 13C(6)15N(2)(K) @ 11                              | missed R-E @ 8                  | -0.00461911 | 1440.71814 | 361.1868 | 1440.7229  | 361.187988 | 4 | 8  | 11.2917    | 14.60 |
| 38 | 40.23 | 42.26 | 57.4 CDK4_FlexII    | 96.1 DLKPENILVSGGTVK                | Label: 13C(6)15N(2)(K) @ 3; Label: 13C(6)15N(2)(K) @ 16                                                 |                                 | -0.00454333 | 1685.94873 | 562.9902 | 1685.95349 | 562.99176  | 3 | 7  | 21.1448    | 14.73 |
| 9  | 54.6  | 56.93 | 78.8 MAT1A_FlexII   | 96.1 TQTVTYMQMDNGAVIPVR             | Deamidated(Q) @ 9; Label: 13C(6)15N(4)(R) @ 18                                                          |                                 | -0.0182777  | 2028.99976 | 677.3405 | 2029.01772 | 677.346558 | 3 | 11 | 18.608     | 26.98 |
| 9  | 54.6  | 56.93 | 78.8 MAT1A_FlexII   | 96.1 TQTVTYMQMDNGAVIPVR             | Label: 13C(6)15N(4)(R) @ 18                                                                             |                                 | -0.0543413  | 2027.97949 | 677.0004 | 2028.03381 | 677.018555 | 3 | 10 | 20.9816    | 26.98 |
| 40 | 39.12 | 41.12 | 63.3 VASP_FlexII    | 96.1 QQPGPSEHIER                    | Label: 13C(6)15N(4)(R) @ 11                                                                             |                                 | 0.00041742  | 1286.62476 | 429.8822 | 1286.62427 | 429.88205  | 3 | 9  | 13.7939    | 4.96  |
| 51 | 32.48 | 34.57 | 50.0 WNT2_FlexII    | 96.1 FHWCCAVR                       | Propionamide(C) @ 4; Propionamide(C) @ 5; Label: 13C(6)15N(4)(R) @ 8                                    |                                 | 0.00101872  | 1172.52576 | 391.8492 | 1172.52466 | 391.848846 | 3 | 9  | 16.7408    | 11.83 |
| 81 | 17.8  | 20.23 | 78.7 CREB1_FlexII   | 96.1 ALKDLYCHK                      | Label: 13C(6)15N(2)(K) @ 3; Propionamide(C) @ 7; Label: 13C(6)15N(2)(K) @ 9                             | missed K-D @ 3                  | -0.00260973 | 1176.62708 | 393.2163 | 1176.62964 | 393.217133 | 3 | 9  | 15.1375    | 9.31  |
| 44 | 37.29 | 39.32 | 43.8 GMCL1_FlexII   | 96.1 LQYIISDLASAR                   | Label: 13C(6)15N(4)(R) @ 12                                                                             |                                 | 0.00315591  | 1358.74646 | 680.3805 | 1358.74329 | 680.378967 | 2 | 7  | 21.7781    | 3.65  |
| 21 | 45.74 | 47.74 | 45.3 BAIAP2_FlexII  | 96.1 RFCFLVEK                       | Label: 13C(6)15N(4)(R) @ 1; Propionamide(C) @ 3; Label: 13C(6)15N(2)(K) @ 8                             | missed R-F @ 1                  | -7.41E-05   | 1129.6073  | 565.8109 | 1129.6073  | 565.810913 | 2 | 8  | 17.5965    | 1.93  |
| 1  | 72.1  | 72.1  | 60.4 RNFB_FlexII    | 96.0 DFENIAQAK                      | Label: 13C(6)15N(2)(K) @ 9                                                                              |                                 | 0.00033276  | 1041.55884 | 521.7867 | 1041.55859 | 521.78856  | 2 | 9  | 18.0622    | 17.06 |
| 34 | 40.84 | 42.89 | 51.0 PITX2_FlexII   | 96.0 NRYPDMSTR                      | Label: 13C(6)15N(4)(R) @ 2; Oxidation(M) @ 6; Label: 13C(6)15N(4)(R) @ 9                                | missed R-Y @ 2                  | 0.00218702  | 1174.53247 | 392.5181 | 1174.5304  | 392.517395 | 3 | 8  | 9.4531     | 6.02  |
| 41 | 38.89 | 40.91 | 49.1 CASP9_FlexII   | 96.0 LSKPTLENLTVPVLRPEIR            | Label: 13C(6)15N(2)(K) @ 3; Deamidated(N) @ 8; Label: 13C(6)15N(4)(R) @ 15; Label: 13C(6)15N(4)(R) @ 19 |                                 | 0.0333606   | 2203.32739 | 1102.671 | 2203.29346 | 1102.65405 | 2 | 10 | 18.2929    | 23.69 |
| 16 | 48.74 | 50.75 | 67.3 CAMK2B_FlexII  | 96.0 NSKPIHTTLNPHVHIGEDAAACIAYR     | Label: 13C(6)15N(2)(K) @ 3; Propionamide(C) @ 23; Label: 13C(6)15N(4)(R) @ 28                           |                                 | -0.0140118  | 3170.66357 | 635.14   | 3170.67773 | 635.142822 | 5 | 10 | 17.2533    | 20.90 |
| 45 | 37.2  | 41.27 | 48.7 CD2C25_FlexII  | 96.0 VRLDNEKEGFFITAIR               | Label: 13C(6)15N(4)(R) @ 2; Deamidated(N) @ 5; Label: 13C(6)15N(2)(K) @ 7; Label: 13C(6)15N(4)(R) @ 16  | missed R-L @ 2; missed K-E @ 7  | 0.0248119   | 1886.05054 | 472.5199 | 1886.02564 | 472.513672 | 4 | 10 | 17.1749    | 12.09 |
| 5  | 59.76 | 61.76 | 81.6 2-SEP_FlexII   | 95.9 TMLUTHMQDLOEVTDLDHYENFR        | Deamidated(Q) @ 11; Label: 13C(6)15N(4)(R) @ 23                                                         |                                 | 0.0287275   | 2872.36885 | 719.0994 | 2872.33984 | 719.092285 | 4 | 6  | 26.7683 NA |       |
| 29 | 42.79 | 44.97 | 59.5 PBK_FlexII     | 95.9 INPICNDHYR                     | Propionamide(C) @ 5; Deamidated(N) @ 6; Label: 13C(6)15N(4)(R) @ 10                                     |                                 | 0.00078688  | 1325.80706 | 663.8108 | 1325.6062  | 663.810364 | 2 | 10 | 15.4491    | 17.23 |
| 60 | 26.43 | 28.47 | 59.7 FCRLA_FlexII   | 95.9 LLFSFYK                        | Label: 13C(6)15N(2)(K) @ 7                                                                              |                                 | 0.00495223  | 924.525085 | 463.2698 | 924.52002  | 463.267304 | 2 | 7  | 22.9993    | 41.77 |
| 33 | 41.31 | 43.51 | 73.9 CDCA7_FlexII   | 95.9 DALLDPNWHCPPCR                 | Propionamide(C) @ 10; Propionamide(C) @ 13; Label: 13C(6)15N(4)(R) @ 14                                 |                                 | 9.42E-05    | 1787.81104 | 596.9443 | 1787.81116 | 596.944336 | 3 | 9  | 17.5389    | 7.86  |
| 29 | 42.79 | 44.97 | 59.5 PBK_FlexII     | 95.8 KLLHGDIK                       | Label: 13C(6)15N(2)(K) @ 1; Label: 13C(6)15N(2)(K) @ 8                                                  | missed K-L @ 1                  | -0.00052032 | 938.587891 | 313.8699 | 938.588379 | 313.870087 | 3 | 8  | 13.0777    | 17.23 |
| 41 | 38.89 | 40.91 | 41.5 NUF2_FlexII    | 95.8 LKTEENSPKR                     | Label: 13C(6)15N(2)(K) @ 2; Label: 13C(6)15N(2)(K) @ 9; Label: 13C(6)15N(4)(R) @ 10                     | missed K-T @ 2; missed K-R @ 9  | -0.00571357 | 1276.69299 | 426.5716 | 1276.69861 | 426.573456 | 3 | 9  | 13.0975    | 8.30  |
| 41 | 38.89 | 40.91 | 49.1 CASP9_FlexII   | 95.8 TRTGSNDCEK                     | Label: 13C(6)15N(2)(K) @ 2; Propionamide(C) @ 9; Label: 13C(6)15N(2)(K) @ 11                            | missed R-T @ 2                  | -0.0135293  | 1311.60718 | 438.2097 | 1311.62073 | 438.214203 | 3 | 6  | 9.2125     | 23.69 |
| 8  | 55.19 | 57.27 | 53.1 CALU_FlexII    | 95.7 HLVSYSDQNKDGK                  | Label: 13C(6)15N(2)(K) @ 10; Label: 13C(6)15N(2)(K) @ 13                                                | missed K-D @ 10                 | 0.0110094   | 1547.76611 | 774.8903 | 1547.75513 | 774.884827 | 2 | 6  | 11.7684    | 7.97  |
| 74 | 19.77 | 22.05 | 31.7 CD2_FlexII     | 95.7 SQAPSHRPPPPGHR                 | Label: 13C(6)15N(4)(R) @ 7; Label: 13C(6)15N(4)(R) @ 14                                                 |                                 | 0.0185343   | 1539.81091 | 385.96   | 1539.79224 | 385.955322 | 4 | 9  | 7.6818     | 11.54 |
| 16 | 48.74 | 50.75 | 67.3 CAMK2B_FlexII  | 95.7 FYFENLLAK                      |                                                                                                         |                                 | -0.00065912 | 1143.59583 | 572.8052 | 1143.59644 | 572.805481 | 2 | 9  | 19.4893    | 20.90 |
| 20 | 46.06 | 48.06 | 47.7 STK24_FlexII   | 95.7 VLFLLPK                        | Label: 13C(6)15N(2)(K) @ 7                                                                              |                                 | -0.0148634  | 836.560059 | 419.2873 | 836.561523 | 419.288025 | 2 | 8  | 19.1196    | 27.14 |
| 2  | 66.54 | 68.54 | 65.5 FZR1_FlexII    | 95.7 YPSLTQVAK                      | Label: 13C(6)15N(2)(K) @ 9                                                                              |                                 | 0.00188782  | 1013.56567 | 507.7901 | 1013.56372 | 507.789124 | 2 | 9  | 16.3875    | 12.66 |
| 32 | 41.57 | 43.64 | 69.8 BMP7_FlexII    | 95.7 TLLWASEEGWLVFIDATSNHVVVNPR     | Deamidated(N) @ 19; Label: 13C(6)15N(4)(R) @ 26                                                         |                                 | 0.010421    | 3038.49048 | 760.6299 | 3038.48023 | 760.627319 | 4 | 10 | 20.4438    | 17.44 |
| 9  | 54.6  | 56.93 | 78.8 MAT1A_FlexII   | 95.8 DLDLKKPIYQK                    | Label: 13C(6)15N(2)(K) @ 5; Label: 13C(6)15N(2)(K) @ 6; Label: 13C(6)15N(2)(K) @ 11                     | missed K-K @ 5                  | 3.03E-05    | 1383.81885 | 462.2802 | 1383.81885 | 462.280212 | 3 | 10 | 15.6742    | 26.98 |
| 9  | 54.6  | 56.93 | 78.8 MAT1A_FlexII   | 95.8 DLDLKKPIYQK                    | Label: 13C(6)15N(2)(K) @ 5; Label: 13C(6)15N(2)(K) @ 6; Label: 13C(6)15N(2)(K) @ 11                     | missed K-K @ 5                  | -0.0115988  | 1383.81751 | 462.2798 | 1383.81885 | 462.280212 | 3 | 10 | 15.9467    | 26.98 |
| 9  | 54.6  | 56.93 | 78.8 MAT1A_FlexII   | 95.6 TERELDDVVHK                    | Label: 13C(6)15N(4)(R) @ 3; Label: 13C(6)15N(2)(K) @ 11                                                 | missed R-E @ 3                  | -0.00648556 | 1355.74622 | 678.8804 | 1355.75281 | 678.883667 | 2 | 10 | 16.0486    | 26.98 |
| 22 | 45.72 | 47.76 | 72.9 BCKDK_FlexII   | 95.6 QILLDDHKDVVTLAEGLR             | Label: 13C(6)15N(2)(K) @ 7; Label: 13C(6)15N(4)(R) @ 18                                                 | missed K-D @ 7                  | -0.00547042 | 2052.12793 | 685.0499 | 2052.1333  | 685.051758 | 3 | 10 | 19.1781    | 2.26  |
| 18 | 48.12 | 50.3  | 76.2 EVL_FlexII     | 95.6 SPLQSDPHSR                     | Deamidated(Q) @ 6; Label: 13C(6)15N(4)(R) @ 10                                                          |                                 | -0.0010968  | 1146.56555 | 383.1958 | 1146.56567 | 383.195831 | 3 | 9  | 11.5595    | 16.66 |
| 14 | 50.19 | 52.2  | 65.0 HIF1AN_FlexII  | 95.6 FHFEEFK                        |                                                                                                         |                                 | -0.00202297 | 934.452637 | 312.4915 | 934.454895 | 312.492218 | 3 | 8  | 15.1105    | 25.53 |
| 29 | 42.79 | 44.97 | 59.5 PBK_FlexII     | 95.6 KLLHGDIK                       | Label: 13C(6)15N(2)(K) @ 1; Label: 13C(6)15N(2)(K) @ 8                                                  | missed K-L @ 1                  | -0.00052032 | 938.587891 | 313.8699 | 938.588379 | 313.870087 | 3 | 8  | 13.3331    | 17.23 |
| 3  | 63.81 | 65.81 | 53.9 XIAP_FlexII    | 95.6 WQYGDSAVGR                     | Label: 13C(6)15N(4)(R) @ 10                                                                             |                                 | 0.00079666  | 1147.52942 | 574.772  | 1147.52886 | 574.771545 | 2 | 9  | 16.0924    | 2.38  |
| 33 | 41.31 | 43.51 | 73.9 CDCA7_FlexII   | 95.6 DALLDPNWHCPPCR                 | Propionamide(C) @ 10; Propionamide(C) @ 13; Label: 13C(6)15N(4)(R) @ 14                                 |                                 | -0.00044511 | 1787.81109 | 596.9442 | 1787.81116 | 596.944336 | 3 | 9  | 17.8       | 7.86  |
| 5  | 59.76 | 61.76 | 81.6 2-SEP_FlexII   | 95.6 MQAQMQMQMQGGDGGDGGALGHVYPTFLYK | Label: 13C(6)15N(2)(K) @ 30                                                                             |                                 | -0.00932742 | 3303.47217 | 826.8753 | 3303.48145 | 826.877625 | 4 | 9  | 26.5925 NA |       |
| 16 | 48.74 | 50.75 | 67.3 CAMK2B_FlexII  | 95.4 EYSEADASHCIQILEAVLHCHQMGSVVHR  | Propionamide(C) @ 11; Propionamide(C) @ 22; Label: 13C(6)15N(4)(R) @ 30                                 |                                 | 0.0128367   | 3617.68855 | 724.5444 | 3617.68408 | 724.544128 | 5 | 10 | 20.3955    | 20.90 |
| 16 | 48.74 | 50.75 | 67.3 CAMK2B_FlexII  | 95.4 FYFENLLAK                      | Label: 13C(6)15N(2)(K) @ 9                                                                              |                                 | -0.0179358  | 1151.60889 | 576.8117 | 1151.6106  | 576.812622 | 2 | 9  | 19.3863    | 20.90 |
| 16 | 48.74 | 50.75 | 67.3 CAMK2B_FlexII  | 95.4 FYFENLLAK                      | Label: 13C(6)15N(2)(K) @ 9                                                                              |                                 | 0.00015955  | 1151.61084 | 576.8127 | 1151.6106  | 576.812622 | 2 | 9  | 19.9062    | 20.90 |
| 51 | 32.48 | 34.57 | 50.0 WNT2_FlexII    | 95.4 DHSLFGR                        | Label: 13C(6)15N(4)(R) @ 7                                                                              |                                 | 0.00071533  | 840.412476 | 421.2135 | 840.411743 | 421.213165 | 2 | 8  | 15.8059    | 11.83 |
| 33 | 41.31 | 43.51 | 73.9 CDCA7_FlexII   | 95.4 NPDCWGVGR                      | Propionamide(C) @ 4; Label: 13C(6)15N(4)(R) @ 8                                                         |                                 | 0.00029222  | 1026.4585  | 514.2365 | 1026.45801 | 514.236328 | 2 | 8  | 16.4551    | 7.86  |
| 39 | 39.97 | 42    | 41.5 SOCS5_FlexII   | 95.4 CQNLFGHEGGSR                   | Propionamide(C) @ 1; Label: 13C(6)15N(4)(R) @ 12                                                        |                                 | 0.00083898  | 1384.6189  | 462.5469 | 1384.61816 | 462.546661 | 3 | 9  | 15.2438    | 1.66  |
| 39 | 39.97 | 42    | 41.5 SOCS5_FlexII   | 95.4 DSAQEDYLFVSVFR                 | Label: 13C(6)15N(4)(R) @ 14                                                                             |                                 | -0.0148483  | 1672.74609 | 558.5893 | 1672.76086 | 558.594238 | 3 | 9  | 19.4733    | 1.66  |
| 49 | 33.63 | 37.69 | 49.1 TDG_FlexII     | 95.4 DLRDQLK                        | Label: 13C(6)15N(4)(R) @ 3; Label: 13C(6)15N(2)(K) @ 7                                                  | missed R-D @ 3                  | -0.00050954 | 904.509277 | 453.2619 | 904.509705 | 453.262116 | 2 | 8  | 15.0013    | 7.02  |
| 31 | 41.62 | 43.81 | 59.6 LIMS1_FlexII   | 95.4 QWHVHEHVCVK                    | Propionamide(C) @ 9; Label: 13C(6)15N(2)(K) @ 11                                                        |                                 | -0.0174387  | 1461.70471 | 488.2422 | 1461.70667 | 488.242828 | 3 | 9  | 16.2401    | 4.68  |
| 74 | 19.77 | 22.05 | 31.7 CD2_FlexII     | 95.4 VOHQPOKMRPPASGTQVHQQK          | Label: 13C(6)15N(2)(K) @ 7; Label: 13C(6)15N(4)(R) @ 8; Label: 13C(6)15N(2)(K) @ 21                     | missed K-R @ 7                  | -0.00461985 | 2401.28906 | 601.3295 | 2401.2937  | 601.330689 | 4 | 9  | 10.0311    | 11.54 |
| 30 | 42.3  | 44.42 | 46.2 ZCCHC12_FlexII | 95.3 CSYCGEEHGSK                    | Propionamide(C) @ 1; Propionamide(C) @ 4; Label: 13C(6)15N(2)(K) @ 11                                   |                                 | 0.00276557  | 1348.52942 | 450.5171 | 1348.52673 | 450.516174 | 3 | 8  | 9.1012     | 11.45 |
| 30 | 42.3  | 44.42 | 46.2 ZCCHC12_FlexII | 95.3 MVREEDWDDAFIKR                 | Label: 13C(6)15N(4)(R) @ 3; Label: 13C(6)15N(2)(K) @ 14; Label: 13C(6)15N(4)(R) @ 15                    | missed R-E @ 3; missed K-R @ 14 | 0.00864803  | 1965.93372 | 492.4907 | 1965.92493 | 492.488495 | 4 | 8  | 26.6493    | 11.45 |
| 52 | 31.37 | 33.43 | 67.9 MMP28_FlexII   | 95.3 RGEAHFDODER                    | Label: 13C(6)15N(4)(R) @ 1; Deamidated(Q) @ 8; Label: 13C(6)15N(4)(R) @ 11                              | missed R-G @ 1                  | -0.00285223 | 1379.59387 | 460.8719 | 1379.59692 | 460.872894 | 3 | 9  | 12.5382    | 2.09  |
| 1  | 72.1  | 72.1  | 60.4 RNFB_FlexII    | 95.3 YPTFLYK                        | Label: 13C(6)15N(2)(K) @ 7                                                                              | cleaved F-Y @ N-term            | -0.00073096 | 938.498657 | 470.2566 | 938.499329 | 470.256928 | 2 | 8  | 18.0278    | 17.06 |
| 2  |       |       |                     |                                     |                                                                                                         |                                 |             |            |          |            |            |   |    |            |       |

|     |       |       |                        |                    |                                             |                    |             |            |          |            |            |   |   |         |       |
|-----|-------|-------|------------------------|--------------------|---------------------------------------------|--------------------|-------------|------------|----------|------------|------------|---|---|---------|-------|
| 12  | 51.78 | 53.79 | 72.4 CSNK1A1L_Flexill  | 95.3 YPTFLYK       | Label:13C(6)15N(2)(K)@7                     | cleaved N-Y@N-term | -0.00073096 | 938.498657 | 470.2566 | 938.499329 | 470.256928 | 2 | 8 | 18.0278 | 9.79  |
| 13  | 50.86 | 52.87 | 65.6 IL16_Flexill      | 95.3 TIFAGGAAAADGR | Label:13C(6)15N(4)(R)@13                    |                    | 0.0280705   | 1186.62512 | 594.3198 | 1186.59705 | 594.305786 | 2 | 9 | 17.324  | 13.95 |
| 13  | 50.86 | 52.87 | 65.6 IL16_Flexill      | 95.3 YPTFLYK       | Label:13C(6)15N(2)(K)@7                     |                    | -0.00073096 | 938.498657 | 470.2566 | 938.499329 | 470.256928 | 2 | 8 | 18.0278 | 13.95 |
| 14  | 50.19 | 52.2  | 65.0 HIF1AN_Flexill    | 95.3 YPTFLYK       | Label:13C(6)15N(2)(K)@7                     | cleaved N-Y@N-term | -0.00073096 | 938.498657 | 470.2566 | 938.499329 | 470.256928 | 2 | 8 | 18.0278 | 25.53 |
| 15  | 49.13 | 51.13 | 73.0 SRGAP1_Flexill    | 95.3 YPTFLYK       | Label:13C(6)15N(2)(K)@7                     | cleaved D-Y@N-term | -0.00073096 | 938.498657 | 470.2566 | 938.499329 | 470.256928 | 2 | 8 | 18.0278 | 3.80  |
| 16  | 48.74 | 50.75 | 67.3 CAMK2B_Flexill    | 95.3 YPTFLYK       | Label:13C(6)15N(2)(K)@7                     | cleaved Q-Y@N-term | -0.00073096 | 938.498657 | 470.2566 | 938.499329 | 470.256928 | 2 | 8 | 18.0278 | 20.90 |
| 17  | 48.68 | 50.69 | 56.7 PRKACG_Flexill    | 95.3 YPTFLYK       | Label:13C(6)15N(2)(K)@7                     | cleaved F-Y@N-term | -0.00073096 | 938.498657 | 470.2566 | 938.499329 | 470.256928 | 2 | 8 | 18.0278 | 16.57 |
| 18  | 48.12 | 50.3  | 76.2 EVL_Flexill       | 95.3 YPTFLYK       | Label:13C(6)15N(2)(K)@7                     | cleaved T-Y@N-term | -0.00073096 | 938.498657 | 470.2566 | 938.499329 | 470.256928 | 2 | 8 | 18.0278 | 16.66 |
| 19  | 47.69 | 49.71 | 41.5 NUF2_Flexill      | 95.3 YPTFLYK       | Label:13C(6)15N(2)(K)@7                     | cleaved T-Y@N-term | -0.00073096 | 938.498657 | 470.2566 | 938.499329 | 470.256928 | 2 | 8 | 18.0278 | 8.30  |
| 20  | 46.06 | 48.06 | 47.7 STK27_Flexill     | 95.3 YPTFLYK       | Label:13C(6)15N(2)(K)@7                     | cleaved H-Y@N-term | -0.00073096 | 938.498657 | 470.2566 | 938.499329 | 470.256928 | 2 | 8 | 18.0278 | 27.14 |
| 21  | 45.74 | 47.74 | 45.3 BAIAP2_Flexill    | 95.3 YPTFLYK       | Label:13C(6)15N(2)(K)@7                     | cleaved V-Y@N-term | -0.00073096 | 938.498657 | 470.2566 | 938.499329 | 470.256928 | 2 | 8 | 18.0278 | 1.93  |
| 22  | 45.72 | 47.76 | 72.9 BCKDK_Flexill     | 95.3 YPTFLYK       | Label:13C(6)15N(2)(K)@7                     | cleaved I-Y@N-term | -0.00073096 | 938.498657 | 470.2566 | 938.499329 | 470.256928 | 2 | 8 | 18.0278 | 2.26  |
| 23  | 45.66 | 47.98 | 57.7 YY1_Flexill       | 95.3 YPTFLYK       | Label:13C(6)15N(2)(K)@7                     | cleaved Q-Y@N-term | -0.00073096 | 938.498657 | 470.2566 | 938.499329 | 470.256928 | 2 | 8 | 18.0278 | 12.87 |
| 24  | 45.3  | 47.31 | 60.7 WNT7A_Flexill     | 95.3 YPTFLYK       | Label:13C(6)15N(2)(K)@7                     |                    | -0.00073096 | 938.498657 | 470.2566 | 938.499329 | 470.256928 | 2 | 8 | 18.0278 | 13.38 |
| 25  | 44.51 | 46.56 | 50.8 CDK7_Flexill      | 95.3 YPTFLYK       | Label:13C(6)15N(2)(K)@7                     | cleaved F-Y@N-term | -0.00073096 | 938.498657 | 470.2566 | 938.499329 | 470.256928 | 2 | 8 | 18.0278 | 10.08 |
| 26  | 44    | 46.07 | 49.5 ORC4L_Flexill     | 95.3 YPTFLYK       | Label:13C(6)15N(2)(K)@7                     | cleaved L-Y@N-term | -0.00073096 | 938.498657 | 470.2566 | 938.499329 | 470.256928 | 2 | 8 | 18.0278 | 13.72 |
| 29  | 42.79 | 44.97 | 59.5 PBK_Flexill       | 95.3 YPTFLYK       | Label:13C(6)15N(2)(K)@7                     | cleaved V-Y@N-term | -0.00073096 | 938.498657 | 470.2566 | 938.499329 | 470.256928 | 2 | 8 | 18.0278 | 17.23 |
| 30  | 42.3  | 44.42 | 46.2 ZCCHC12_Flexill   | 95.3 YPTFLYK       | Label:13C(6)15N(2)(K)@7                     | cleaved L-Y@N-term | -0.00073096 | 938.498657 | 470.2566 | 938.499329 | 470.256928 | 2 | 8 | 18.0278 | 11.45 |
| 31  | 41.62 | 43.81 | 59.6 LIMS1_Flexill     | 95.3 YPTFLYK       | Label:13C(6)15N(2)(K)@7                     |                    | -0.00073096 | 938.498657 | 470.2566 | 938.499329 | 470.256928 | 2 | 8 | 18.0278 | 4.68  |
| 32  | 41.57 | 43.64 | 69.8 BMP7_Flexill      | 95.3 YPTFLYK       | Label:13C(6)15N(2)(K)@7                     | cleaved H-Y@N-term | -0.00073096 | 938.498657 | 470.2566 | 938.499329 | 470.256928 | 2 | 8 | 18.0278 | 17.44 |
| 33  | 41.31 | 43.51 | 73.9 CDCA7_Flexill     | 95.3 YPTFLYK       | Label:13C(6)15N(2)(K)@7                     | cleaved A-Y@N-term | -0.00073096 | 938.498657 | 470.2566 | 938.499329 | 470.256928 | 2 | 8 | 18.0278 | 7.86  |
| 34  | 40.84 | 42.89 | 51.0 PITX2_Flexill     | 95.3 YPTFLYK       | Label:13C(6)15N(2)(K)@7                     | cleaved V-Y@N-term | -0.00073096 | 938.498657 | 470.2566 | 938.499329 | 470.256928 | 2 | 8 | 18.0278 | 6.02  |
| 35  | 40.71 | 42.76 | 46.9 SP100_Flexill     | 95.3 YPTFLYK       | Label:13C(6)15N(2)(K)@7                     | cleaved D-Y@N-term | -0.00073096 | 938.498657 | 470.2566 | 938.499329 | 470.256928 | 2 | 8 | 18.0278 | 15.89 |
| 36  | 40.58 | 42.7  | 45.4 CSNK1D_Flexill    | 95.3 YPTFLYK       | Label:13C(6)15N(2)(K)@7                     |                    | -0.00073096 | 938.498657 | 470.2566 | 938.499329 | 470.256928 | 2 | 8 | 18.0278 | 14.60 |
| 37  | 40.52 | 46.67 | 40.3 PRKACB_Flexill    | 95.3 YPTFLYK       | Label:13C(6)15N(2)(K)@7                     | cleaved F-Y@N-term | -0.00073096 | 938.498657 | 470.2566 | 938.499329 | 470.256928 | 2 | 8 | 18.0278 | 9.90  |
| 38  | 40.23 | 42.26 | 57.4 CDK4_Flexill      | 95.3 YPTFLYK       | Label:13C(6)15N(2)(K)@7                     | cleaved E-Y@N-term | -0.00073096 | 938.498657 | 470.2566 | 938.499329 | 470.256928 | 2 | 8 | 18.0278 | 14.73 |
| 39  | 39.97 | 42    | 41.5 SOCS5_Flexill     | 95.3 YPTFLYK       | Label:13C(6)15N(2)(K)@7                     |                    | -0.00073096 | 938.498657 | 470.2566 | 938.499329 | 470.256928 | 2 | 8 | 18.0278 | 1.66  |
| 40  | 39.12 | 41.12 | 63.3 VASP_Flexill      | 95.3 YPTFLYK       | Label:13C(6)15N(2)(K)@7                     | cleaved P-Y@N-term | -0.00073096 | 938.498657 | 470.2566 | 938.499329 | 470.256928 | 2 | 8 | 18.0278 | 4.96  |
| 41  | 38.89 | 40.91 | 49.1 CASP9_Flexill     | 95.3 YPTFLYK       | Label:13C(6)15N(2)(K)@7                     | cleaved S-Y@N-term | -0.00073096 | 938.498657 | 470.2566 | 938.499329 | 470.256928 | 2 | 8 | 18.0278 | 23.69 |
| 42  | 38.57 | 40.97 | 55.8 MAPKAPK3_Flexill  | 95.3 YPTFLYK       | Label:13C(6)15N(2)(K)@7                     | cleaved Q-Y@N-term | -0.00073096 | 938.498657 | 470.2566 | 938.499329 | 470.256928 | 2 | 8 | 18.0278 | 15.68 |
| 43  | 38.44 | 40.47 | 30.1 ARPC1B_Flexill    | 95.3 YPTFLYK       | Label:13C(6)15N(2)(K)@7                     |                    | -0.00073096 | 938.498657 | 470.2566 | 938.499329 | 470.256928 | 2 | 8 | 18.0278 | 4.64  |
| 44  | 37.29 | 39.32 | 43.8 GMCL1_Flexill     | 95.3 YPTFLYK       | Label:13C(6)15N(2)(K)@7                     | cleaved N-Y@N-term | -0.00073096 | 938.498657 | 470.2566 | 938.499329 | 470.256928 | 2 | 8 | 18.0278 | 3.65  |
| 45  | 37.2  | 41.27 | 48.7 CDC2L5_Flexill    | 95.3 YPTFLYK       | Label:13C(6)15N(2)(K)@7                     | cleaved I-Y@N-term | -0.00073096 | 938.498657 | 470.2566 | 938.499329 | 470.256928 | 2 | 8 | 18.0278 | 12.09 |
| 46  | 36.36 | 38.64 | 86.3 HOXC11_Flexill    | 95.3 YPTFLYK       | Label:13C(6)15N(2)(K)@7                     | cleaved L-Y@N-term | -0.00073096 | 938.498657 | 470.2566 | 938.499329 | 470.256928 | 2 | 8 | 18.0278 | 3.80  |
| 47  | 36.2  | 38.23 | 36.2 WAS_Flexill       | 95.3 YPTFLYK       | Label:13C(6)15N(2)(K)@7                     | cleaved D-Y@N-term | -0.00073096 | 938.498657 | 470.2566 | 938.499329 | 470.256928 | 2 | 8 | 18.0278 | 11.23 |
| 48  | 36.13 | 38.14 | 49.0 TNFRSF10A_Flexill | 95.3 YPTFLYK       | Label:13C(6)15N(2)(K)@7                     | cleaved E-Y@N-term | -0.00073096 | 938.498657 | 470.2566 | 938.499329 | 470.256928 | 2 | 8 | 18.0278 | 12.24 |
| 49  | 33.63 | 37.69 | 49.1 TDG_Flexill       | 95.3 YPTFLYK       | Label:13C(6)15N(2)(K)@7                     | cleaved A-Y@N-term | -0.00073096 | 938.498657 | 470.2566 | 938.499329 | 470.256928 | 2 | 8 | 18.0278 | 7.02  |
| 51  | 32.48 | 34.57 | 50.0 WNT2_Flexill      | 95.3 YPTFLYK       | Label:13C(6)15N(2)(K)@7                     | cleaved T-Y@N-term | -0.00073096 | 938.498657 | 470.2566 | 938.499329 | 470.256928 | 2 | 8 | 18.0278 | 11.83 |
| 52  | 31.37 | 33.43 | 67.9 MMP28_Flexill     | 95.3 YPTFLYK       | Label:13C(6)15N(2)(K)@7                     | cleaved V-Y@N-term | -0.00073096 | 938.498657 | 470.2566 | 938.499329 | 470.256928 | 2 | 8 | 18.0278 | 2.09  |
| 53  | 31.04 | 33.33 | 61.1 IRF3_Flexill      | 95.3 YPTFLYK       | Label:13C(6)15N(2)(K)@7                     | cleaved Q-Y@N-term | -0.00073096 | 938.498657 | 470.2566 | 938.499329 | 470.256928 | 2 | 8 | 18.0278 | 5.45  |
| 57  | 27.77 | 29.91 | 42.0 MAPK9_Flexill     | 95.3 YPTFLYK       | Label:13C(6)15N(2)(K)@7                     |                    | -0.00073096 | 938.498657 | 470.2566 | 938.499329 | 470.256928 | 2 | 8 | 18.0278 | 2.36  |
| 60  | 26.43 | 28.47 | 59.7 FCRLA_Flexill     | 95.3 YPTFLYK       | Label:13C(6)15N(2)(K)@7                     | cleaved E-Y@N-term | -0.00073096 | 938.498657 | 470.2566 | 938.499329 | 470.256928 | 2 | 8 | 18.0278 | 41.77 |
| 61  | 26.19 | 28.33 | 39.3 CEACAM1_Flexill   | 95.3 YPTFLYK       | Label:13C(6)15N(2)(K)@7                     |                    | -0.00073096 | 938.498657 | 470.2566 | 938.499329 | 470.256928 | 2 | 8 | 18.0278 | 25.32 |
| 62  | 26.07 | 28.07 | 17.4 CWF19L1_Flexill   | 95.3 YPTFLYK       | Label:13C(6)15N(2)(K)@7                     | cleaved D-Y@N-term | -0.00073096 | 938.498657 | 470.2566 | 938.499329 | 470.256928 | 2 | 8 | 18.0278 | 0.57  |
| 65  | 25.39 | 29.86 | 33.5 BAIAP2L2_Flexill  | 95.3 YPTFLYK       | Label:13C(6)15N(2)(K)@7                     |                    | -0.00073096 | 938.498657 | 470.2566 | 938.499329 | 470.256928 | 2 | 8 | 18.0278 | 0.51  |
| 67  | 22.59 | 26.91 | 28.5 HCK_Flexill       | 95.3 YPTFLYK       | Label:13C(6)15N(2)(K)@7                     | cleaved P-Y@N-term | -0.00073096 | 938.498657 | 470.2566 | 938.499329 | 470.256928 | 2 | 8 | 18.0278 | 0.80  |
| 68  | 22.06 | 24.16 | 23.2 FSCN3_Flexill     | 95.3 YPTFLYK       | Label:13C(6)15N(2)(K)@7                     | cleaved F-Y@N-term | -0.00073096 | 938.498657 | 470.2566 | 938.499329 | 470.256928 | 2 | 8 | 18.0278 | 1.45  |
| 70  | 21.59 | 23.62 | 34.5 NLE1_Flexill      | 95.3 YPTFLYK       | Label:13C(6)15N(2)(K)@7                     |                    | -0.00073096 | 938.498657 | 470.2566 | 938.499329 | 470.256928 | 2 | 8 | 18.0278 | 25.98 |
| 73  | 20.3  | 23.6  | 44.5 TNFRSF10B_Flexill | 95.3 YPTFLYK       | Label:13C(6)15N(2)(K)@7                     | cleaved S-Y@N-term | -0.00073096 | 938.498657 | 470.2566 | 938.499329 | 470.256928 | 2 | 8 | 18.0278 | 34.27 |
| 74  | 19.77 | 22.05 | 31.7 CD2_Flexill       | 95.3 YPTFLYK       | Label:13C(6)15N(2)(K)@7                     | cleaved N-Y@N-term | -0.00073096 | 938.498657 | 470.2566 | 938.499329 | 470.256928 | 2 | 8 | 18.0278 | 11.54 |
| 76  | 18.62 | 20.7  | 20.8 TNFRSF1A_Flexill  | 95.3 YPTFLYK       | Label:13C(6)15N(2)(K)@7                     |                    | -0.00073096 | 938.498657 | 470.2566 | 938.499329 | 470.256928 | 2 | 8 | 18.0278 | 1.24  |
| 77  | 18.56 | 20.75 | 31.4 HOXA3_Flexill     | 95.3 YPTFLYK       | Label:13C(6)15N(2)(K)@7                     | cleaved L-Y@N-term | -0.00073096 | 938.498657 | 470.2566 | 938.499329 | 470.256928 | 2 | 8 | 18.0278 | 2.41  |
| 79  | 18.05 | 20.06 | 32.5 ETV5_Flexill      | 95.3 YPTFLYK       | Label:13C(6)15N(2)(K)@7                     | cleaved Y-Y@N-term | -0.00073096 | 938.498657 | 470.2566 | 938.499329 | 470.256928 | 2 | 8 | 18.0278 | 1.82  |
| 80  | 18    | 20    | 26.9 PSENI1_Flexill    | 95.3 YPTFLYK       | Label:13C(6)15N(2)(K)@7                     | cleaved I-Y@N-term | -0.00073096 | 938.498657 | 470.2566 | 938.499329 | 470.256928 | 2 | 8 | 18.0278 | 27.70 |
| 81  | 17.8  | 20.23 | 78.7 CREB1_Flexill     | 95.3 YPTFLYK       | Label:13C(6)15N(2)(K)@7                     | cleaved D-Y@N-term | -0.00073096 | 938.498657 | 470.2566 | 938.499329 | 470.256928 | 2 | 8 | 18.0278 | 9.31  |
| 90  | 12.01 | 18.01 | 33.3 SRGAP3_Flexill    | 95.3 YPTFLYK       | Label:13C(6)15N(2)(K)@7                     | cleaved L-Y@N-term | -0.00073096 | 938.498657 | 470.2566 | 938.499329 | 470.256928 | 2 | 8 | 18.0278 | 0.68  |
| 91  | 12    | 20.75 | 41.1 HOXD3_Flexill     | 95.3 YPTFLYK       | Label:13C(6)15N(2)(K)@7                     | cleaved L-Y@N-term | -0.00073096 | 938.498657 | 470.2566 | 938.499329 | 470.256928 | 2 | 8 | 18.0278 | 4.09  |
| 96  | 10    | 12    | 18.9 SLC38A2_Flexill   | 95.3 YPTFLYK       | Label:13C(6)15N(2)(K)@7                     | cleaved H-Y@N-term | -0.00073096 | 938.498657 | 470.2566 | 938.499329 | 470.256928 | 2 | 8 | 18.0278 | 9.75  |
| 98  | 9.49  | 15.64 | 11.4 PSEN2_Flexill     | 95.3 YPTFLYK       | Label:13C(6)15N(2)(K)@7                     | cleaved I-Y@N-term | -0.00073096 | 938.498657 | 470.2566 | 938.499329 | 470.256928 | 2 | 8 | 18.0278 | 11.78 |
| 101 | 8.41  | 10.48 | 16.5 MND4_Flexill      | 95.3 YPTFLYK       | Label:13C(6)15N(2)(K)@7                     | cleaved N-Y@N-term | -0.00073096 | 938.498657 | 470.2566 | 938.499329 | 470.256928 | 2 | 8 | 18.0278 | 0.64  |
| 107 | 7.88  | 9.98  | 22.2 TSPAN12_Flexill   | 95.3 YPTFLYK       | Label:13C(6)15N(2)(K)@7                     | cleaved L-Y@N-term | -0.00073096 | 938.498657 | 470.2566 | 938.499329 | 470.256928 | 2 | 8 | 18.0278 | 10.06 |
| 4   | 62.05 | 64.05 | 56.1 CDC25C_Flexill    | 95.3 DTSFTVCPDVR   | Propionamide(C)@7, Label:13C(6)15N(4)(R)@12 |                    | 0.00789253  | 1416.66626 | 709.3404 | 1416.65833 | 709.3      |   |   |         |       |

|     |       |       |                        |                                          |                                                                                                                                                       |                             |             |            |          |            |            |   |    |            |       |
|-----|-------|-------|------------------------|------------------------------------------|-------------------------------------------------------------------------------------------------------------------------------------------------------|-----------------------------|-------------|------------|----------|------------|------------|---|----|------------|-------|
| 36  | 40.58 | 42.7  | 45.4 CSNK1D_FlexIII    | 95.3 THQHIPPYRENK                        | Label: 13C(6)15N(4)(R)@8; Label: 13C(6)15N(2)(K)@11                                                                                                   | missed R-E@8                | -0.00212968 | 1439.73669 | 480.9195 | 1439.73889 | 480.920227 | 3 | 9  | 8.8771     | 14.60 |
| 6   | 58.66 | 60.67 | 85.0 ARR81_FlexIII     | 95.2 LKHEDTNLASSTLLR                     | Label: 13C(6)15N(2)(K)@2; Label: 13C(6)15N(4)(R)@15                                                                                                   | missed K-H@2                | -0.0041416  | 1714.92932 | 429.7396 | 1714.93323 | 429.740601 | 4 | 7  | 26.692     | 18.42 |
| 18  | 48.12 | 50.3  | 76.2 EVL_FlexIII       | 95.2 RVQRPEDASGGSSPSGTSK                 | Label: 13C(6)15N(4)(R)@1; Deamidated(Q)@3; Label: 13C(6)15N(4)(R)@4; Label: 13C(6)15N(2)(K)@19                                                        | missed R-V@1                | -0.00670027 | 1930.92737 | 644.6497 | 1930.93384 | 644.651917 | 3 | 10 | 8.7817     | 16.66 |
| 10  | 53.11 | 55.13 | 57.4 TP53_FlexIII      | 95.2 CSDSDGLAPPQHILR                     | Propionamide(C)@1; Label: 13C(6)15N(4)(R)@15                                                                                                          |                             | -0.00663719 | 1688.8114  | 423.2101 | 1688.81799 | 423.211762 | 4 | 9  | 16.5298    | 9.55  |
| 9   | 54.6  | 56.93 | 78.8 MAT1A_FlexIII     | 95.1 TGMVLGCEITSMAMVDYQR                 | Propionamide(C)@7; Deamidated(Q)@19; Label: 13C(6)15N(4)(R)@20                                                                                        |                             | 0.02946     | 2299.08911 | 767.3703 | 2299.05957 | 767.360474 | 3 | 11 | 20.4195    | 26.98 |
| 16  | 48.74 | 50.75 | 67.3 CAMK2B_FlexIII    | 95.1 GAILTTMLATR                         | Label: 13C(6)15N(4)(R)@11                                                                                                                             |                             | -0.00587317 | 1156.64551 | 579.33   | 1156.65137 | 579.332947 | 2 | 9  | 19.6852    | 20.90 |
| 61  | 26.19 | 28.33 | 39.3 CEACAM1_FlexIII   | 95.1 TLTLTSVTR                           | Label: 13C(6)15N(4)(R)@9                                                                                                                              |                             | 0.0113003   | 1012.62689 | 507.3207 | 1012.6156  | 507.315094 | 2 | 8  | 23.5191    | 25.32 |
| 17  | 48.68 | 50.69 | 56.7 PRKACG_FlexIII    | 95.1 FSEPHACFYAAQVVLAVQYHSLDLIHR         | Propionamide(C)@7; Deamidated(Q)@18; Label: 13C(6)15N(4)(R)@28                                                                                        |                             | 0.00016694  | 3308.66821 | 662.7409 | 3308.66797 | 662.740906 | 5 | 9  | 26.6946    | 16.57 |
| 52  | 31.37 | 33.43 | 67.9 MMP28_FlexIII     | 95.1 ISDLFAR                             |                                                                                                                                                       |                             | -0.00098251 | 820.443298 | 411.2289 | 820.444275 | 411.229431 | 2 | 8  | 17.4014    | 2.09  |
| 6   | 58.66 | 60.67 | 85.0 ARR81_FlexIII     | 95.1 VKLVVSR                             |                                                                                                                                                       | missed K-L@2                | -0.00177573 | 817.548645 | 409.7816 | 817.550415 | 409.782501 | 2 | 8  | 14.6896    | 18.42 |
| 101 | 8.41  | 10.48 | 16.5 MNDA_FlexIII      | 95.1 STMFHATVASK                         | Label: 13C(6)15N(2)(K)@2; Label: 13C(6)15N(4)(R)@7                                                                                                    |                             | -0.00187883 | 1186.58765 | 396.5365 | 1186.5896  | 396.53714  | 3 | 9  | 15.1922    | 0.64  |
| 21  | 45.74 | 47.74 | 45.3 BAIAP2_FlexIII    | 95.0 ALAGVTYAAK                          | Label: 13C(6)15N(2)(K)@10                                                                                                                             |                             | -0.00755398 | 971.545654 | 486.7801 | 971.553101 | 486.783844 | 2 | 8  | 15.583     | 1.93  |
| 25  | 44.51 | 46.56 | 50.8 CDK7_FlexIII      | 95.0 LADFLGAK                            | Label: 13C(6)15N(2)(K)@8                                                                                                                              |                             | 0.00793742  | 841.486877 | 421.7507 | 841.478882 | 421.746735 | 2 | 7  | 26.4581    | 10.08 |
| 40  | 39.12 | 41.12 | 63.3 VASP_FlexIII      | 95.0 VKEEIEAFVQELR                       | Label: 13C(6)15N(2)(K)@2; Deamidated(Q)@11; Label: 13C(6)15N(4)(R)@14                                                                                 | missed K-E@2                | 0.0221775   | 1720.95886 | 574.6602 | 1720.93665 | 574.652832 | 3 | 10 | 20.3231    | 4.96  |
| 31  | 41.62 | 43.81 | 59.6 LIMS1_FlexIII     | 94.9 GLAYCETHYNQLFGDVCFHGCR              | Propionamide(C)@5; Deamidated(N)@10; Propionamide(C)@17; Propionamide(C)@20; Label: 13C(6)15N(4)(R)@22                                                |                             | 0.0112931   | 2813.21387 | 704.3107 | 2813.20239 | 704.307861 | 4 | 10 | 18.2899    | 4.68  |
| 11  | 52.74 | 54.75 | 70.6 HOXC10_FlexIII    | 94.9 ASPSYSALDKTPHCSGANDFEAPFEQR         | Label: 13C(6)15N(2)(K)@10; Propionamide(C)@14; Deamidated(N)@18; Label: 13C(6)15N(4)(R)@27                                                            | missed K-T@10               | 0.0231592   | 3014.37061 | 754.5999 | 3014.34717 | 754.594055 | 4 | 10 | 17.4172    | 7.09  |
| 11  | 52.74 | 54.75 | 70.6 HOXC10_FlexIII    | 94.9 TEQSLAGPK                           | Label: 13C(6)15N(2)(K)@9                                                                                                                              |                             | -0.0309372  | 937.465088 | 469.7398 | 937.496033 | 469.75528  | 2 | 8  | 13.3383    | 7.09  |
| 11  | 52.74 | 54.75 | 70.6 HOXC10_FlexIII    | 94.9 TINLTDR                             | Label: 13C(6)15N(4)(R)@7                                                                                                                              |                             | -0.00222206 | 841.45105  | 421.7328 | 841.453308 | 421.733917 | 2 | 8  | 15.4747    | 7.09  |
| 30  | 42.3  | 44.42 | 46.2 ZCCHC12_FlexIII   | 94.8 LKDFLR                              | Label: 13C(6)15N(2)(K)@2; Label: 13C(6)15N(4)(R)@6                                                                                                    | missed K-D@2                | -0.00610271 | 808.48645  | 405.2505 | 808.492615 | 405.253571 | 2 | 8  | 16.1764    | 11.45 |
| 14  | 50.19 | 52.2  | 65.0 HIF1AN_FlexIII    | 94.8 MANFONFKPR                          | Label: 13C(6)15N(2)(K)@8; Label: 13C(6)15N(4)(R)@10                                                                                                   |                             | -0.00405209 | 1269.63672 | 424.2195 | 1269.64075 | 424.220856 | 3 | 9  | 16.2902    | 25.53 |
| 18  | 48.12 | 50.3  | 76.2 EVL_FlexIII       | 94.8 AASOSDKPAEKKEDESOMEDPSTSPSPQTR      | Deamidated(Q)@4; Label: 13C(6)15N(2)(K)@7; Label: 13C(6)15N(2)(K)@11; Label: 13C(6)15N(2)(K)@12; Oxidation(M)@18; Label: missed K-K@11; missed K-E@12 |                             | -0.00491965 | 3240.46167 | 649.0996 | 3240.46655 | 649.100586 | 5 | 9  | 12.8671    | 16.66 |
| 18  | 48.12 | 50.3  | 76.2 EVL_FlexIII       | 94.8 SPLOSQPHSR                          | Label: 13C(6)15N(4)(R)@10                                                                                                                             |                             | 0.00081514  | 1145.58252 | 382.8681 | 1145.58137 | 382.867828 | 3 | 8  | 10.2221    | 16.66 |
| 9   | 54.6  | 56.93 | 78.8 MAT1A_FlexIII     | 94.8 IHTIVISQHNEDITLEEMR                 | Deamidated(Q)@9; Label: 13C(6)15N(4)(R)@20                                                                                                            |                             | 0.025929    | 2387.22876 | 796.7502 | 2387.20313 | 796.741638 | 3 | 11 | 17.9247    | 26.98 |
| 19  | 47.69 | 49.71 | 41.5 NUF2_FlexIII      | 94.7 IQDLSDNREK                          | Label: 13C(6)15N(4)(R)@8; Label: 13C(6)15N(2)(K)@10                                                                                                   | missed R-E@8                | 0.00567538  | 1234.63294 | 412.5516 | 1234.6272  | 412.549833 | 3 | 8  | 12.6888    | 8.30  |
| 25  | 44.51 | 46.56 | 50.8 CDK7_FlexIII      | 94.7 AYTHQVIVTR                          | Label: 13C(6)15N(4)(R)@9                                                                                                                              |                             | 0.00084231  | 1083.57092 | 362.1976 | 1083.57007 | 362.197296 | 3 | 8  | 12.5782    | 10.08 |
| 25  | 44.51 | 46.56 | 50.8 CDK7_FlexIII      | 94.7 EQSNPALAIKR                         | Label: 13C(6)15N(2)(K)@10; Label: 13C(6)15N(4)(R)@11                                                                                                  | missed K-R@10               | -0.0101423  | 1243.69031 | 415.5707 | 1243.70032 | 415.574066 | 3 | 9  | 14.9307    | 10.08 |
| 4   | 62.05 | 64.05 | 56.1 CDC25C_FlexIII    | 94.7 EQIALLVK                            | Label: 13C(6)15N(2)(K)@8                                                                                                                              |                             | 0.00018788  | 920.578857 | 461.2967 | 920.578613 | 461.29657  | 2 | 7  | 17.9139    | 33.74 |
| 4   | 62.05 | 64.05 | 56.1 CDC25C_FlexIII    | 94.7 IIIVFHCFSSSR                        | Propionamide(C)@7; Label: 13C(6)15N(4)(R)@13                                                                                                          |                             | -0.0132176  | 1659.81885 | 554.2802 | 1659.83179 | 554.284546 | 3 | 9  | 18.8178    | 33.74 |
| 4   | 62.05 | 64.05 | 56.1 CDC25C_FlexIII    | 94.7 IIIVFHCFSSSR                        | Propionamide(C)@7; Label: 13C(6)15N(4)(R)@13                                                                                                          |                             | -0.0132176  | 1659.81885 | 554.2802 | 1659.83179 | 554.284546 | 3 | 9  | 19.9303    | 33.74 |
| 47  | 36.2  | 38.23 | 36.2 WAS_FlexIII       | 94.6 RQEPLPPPPPPSR                       | Label: 13C(6)15N(4)(R)@1; Label: 13C(6)15N(4)(R)@13                                                                                                   | missed R-Q@1                | -0.00740437 | 1486.80947 | 496.6101 | 1486.81592 | 496.612579 | 3 | 9  | 15.4233    | 11.23 |
| 9   | 54.6  | 56.93 | 78.8 MAT1A_FlexIII     | 94.6 IHTIVISQHNEDITLEEMRR                | Deamidated(Q)@9; Label: 13C(6)15N(4)(R)@20; Label: 13C(6)15N(4)(R)@21                                                                                 | missed R-R@20               | 0.0263127   | 2553.33862 | 852.1202 | 2553.3125  | 852.111389 | 3 | 11 | 19.911     | 26.98 |
| 9   | 54.6  | 56.93 | 78.8 MAT1A_FlexIII     | 94.6 RSGLLPWLRPDSK                       | Label: 13C(6)15N(4)(R)@10; Label: 13C(6)15N(4)(R)@9; Label: 13C(6)15N(2)(K)@13                                                                        | missed R-S@1                | 0.00618244  | 1551.89417 | 388.9808 | 1551.88794 | 388.979279 | 4 | 10 | 17.9675    | 26.98 |
| 15  | 49.13 | 51.13 | 73.0 SRGAP1_FlexIII    | 94.6 KDONLSPVNCWYLLLNQVRR                | Label: 13C(6)15N(2)(K)@1; Deamidated(N)@10; Propionamide(C)@11; Label: 13C(6)15N(4)(R)@20; Label: 13C(6)15N(4)(R)@21                                  | missed K-D@1; missed R-R@20 | 0.0251572   | 2671.45142 | 668.8701 | 2671.42627 | 668.863831 | 4 | 10 | 20.1576    | 3.80  |
| 15  | 49.13 | 51.13 | 73.0 SRGAP1_FlexIII    | 94.6 SGDPVFHHR                           |                                                                                                                                                       |                             | -0.00763618 | 1026.51697 | 343.1796 | 1026.52466 | 343.182159 | 3 | 8  | 16.359     | 3.80  |
| 31  | 41.62 | 43.81 | 59.6 LIMS1_FlexIII     | 94.5 FVEFDMKPVCKK                        | Label: 13C(6)15N(2)(K)@7; Propionamide(C)@10; Label: 13C(6)15N(2)(K)@11; Label: 13C(6)15N(2)(K)@12                                                    | missed K-K@11               | -0.00356662 | 1564.81738 | 392.2116 | 1564.8208  | 392.212463 | 4 | 9  | 16.6804    | 4.68  |
| 5   | 59.76 | 61.76 | 81.6 2-SEP_FlexIII     | 94.4 VHCCFYFISFGHGLKPLDVAFMKAHKNVNIQVIAK | Propionamide(C)@3; Propionamide(C)@4; Label: 13C(6)15N(2)(K)@16; Label: 13C(6)15N(2)(K)@24; Label: 13C(6)15N(2)(K)@29; missed K-A@24; missed K-V@29   |                             | 0.0121694   | 4426.41016 | 886.2893 | 4426.39795 | 886.286865 | 5 | 10 | 19.9035 NA |       |
| 16  | 48.74 | 50.75 | 67.3 CAMK2B_FlexIII    | 94.4 LTQYIDGGGRPR                        | Label: 13C(6)15N(4)(R)@10; Label: 13C(6)15N(4)(R)@12                                                                                                  |                             | 0.00021232  | 1422.74856 | 475.2568 | 1422.74829 | 475.256683 | 3 | 9  | 14.6777    | 20.90 |
| 16  | 48.74 | 50.75 | 67.3 CAMK2B_FlexIII    | 94.4 LTQYIDGGGRPR                        | Label: 13C(6)15N(4)(R)@10; Label: 13C(6)15N(4)(R)@12                                                                                                  |                             | -0.00042855 | 1422.74793 | 475.2566 | 1422.74829 | 475.256683 | 3 | 9  | 14.9367    | 20.90 |
| 16  | 48.74 | 50.75 | 67.3 CAMK2B_FlexIII    | 94.4 STVASMMHHR                          |                                                                                                                                                       |                             | -0.00108732 | 1018.46765 | 340.4965 | 1018.46881 | 340.496887 | 3 | 8  | 14.9465    | 20.90 |
| 47  | 36.2  | 38.23 | 36.2 WAS_FlexIII       | 94.3 YRGLPAPGSPADK                       | Label: 13C(6)15N(4)(R)@2; Label: 13C(6)15N(2)(K)@14                                                                                                   | missed R-G@2                | 0.00479033  | 1442.76856 | 481.9301 | 1442.76367 | 481.928497 | 3 | 9  | 15.3297    | 11.23 |
| 23  | 45.66 | 47.98 | 57.7 YYI_FlexIII       | 94.3 QLAEFAR                             |                                                                                                                                                       |                             | 0.00551855  | 833.445088 | 417.7298 | 833.439575 | 417.727051 | 2 | 8  | 16.0998    | 12.87 |
| 48  | 36.13 | 38.14 | 49.0 TNFRSF10A_FlexIII | 94.3 SDEEERSPCTTTR                       | Label: 13C(6)15N(4)(R)@6; Propionamide(C)@9; Label: 13C(6)15N(4)(R)@13                                                                                | missed R-S@6                | -0.00171776 | 1600.6886  | 534.5701 | 1600.69019 | 534.570679 | 3 | 8  | 10.8949    | 12.24 |
| 12  | 51.78 | 53.79 | 72.4 CSNK1A1L_FlexIII  | 94.3 TRQHIPPYREDK                        | Label: 13C(6)15N(4)(R)@2; Label: 13C(6)15N(4)(R)@8; Label: 13C(6)15N(2)(K)@11                                                                         | missed R-Q@2; missed R-E@8  | -0.00578607 | 1469.76758 | 490.9298 | 1469.77332 | 490.931732 | 3 | 9  | 10.4552    | 9.79  |
| 67  | 22.59 | 26.91 | 26.5 HCK_FlexIII       | 94.2 TMMKPGSMSEVFAEAEANVMK               | Label: 13C(6)15N(2)(K)@3; Deamidated(N)@17; Label: 13C(6)15N(2)(K)@20                                                                                 |                             | 0.0185682   | 2157.06763 | 720.0298 | 2157.04907 | 720.023621 | 3 | 10 | 19.7356    | 0.80  |
| 38  | 40.23 | 42.26 | 57.4 CDK4_FlexIII      | 94.2 IFDGLIPPEDDWPRDVSILPR               | Label: 13C(6)15N(4)(R)@15; Label: 13C(6)15N(4)(R)@21                                                                                                  | missed R-D@15               | 0.00184271  | 2469.28223 | 824.1014 | 2469.28076 | 824.10083  | 3 | 9  | 20.4227    | 14.73 |
| 61  | 26.19 | 28.33 | 39.3 CEACAM1_FlexIII   | 94.2 TLTLTSVTR                           | Label: 13C(6)15N(4)(R)@9                                                                                                                              |                             | -0.0087192  | 1012.60687 | 507.3107 | 1012.6156  | 507.315094 | 2 | 8  | 22.3751    | 25.32 |
| 9   | 54.6  | 56.93 | 78.8 MAT1A_FlexIII     | 94.1 KLVFYPTFLYK                         | Label: 13C(6)15N(2)(K)@1; Label: 13C(6)15N(2)(K)@11                                                                                                   | missed K-L@1                | 0.00118411  | 1433.83057 | 478.9508 | 1433.82935 | 478.950409 | 3 | 9  | 19.3585    | 26.98 |
| 9   | 54.6  | 56.93 | 78.8 MAT1A_FlexIII     | 94.1 RSGLLPWLRPDSK                       | Label: 13C(6)15N(4)(R)@1; Label: 13C(6)15N(4)(R)@9; Label: 13C(6)15N(2)(K)@13                                                                         | missed R-S@1                | -0.00193349 | 1551.88611 | 776.9503 | 1551.88794 | 776.951294 | 2 | 10 | 17.9641    | 26.98 |
| 31  | 41.62 | 43.81 | 59.6 LIMS1_FlexIII     | 94.1 FVEFDMKPVCKK                        | Label: 13C(6)15N(2)(K)@7; Propionamide(C)@10; Label: 13C(6)15N(2)(K)@11; Label: 13C(6)15N(2)(K)@12                                                    | missed K-K@11               | 0.0064866   | 1564.82277 | 783.4209 | 1564.8208  | 783.417664 | 2 | 9  | 16.7915    | 4.68  |
| 15  | 49.13 | 51.13 | 73.0 SRGAP1_FlexIII    | 94.1 LATLKIENEVKK                        | Label: 13C(6)15N(2)(K)@5; Label: 13C(6)15N(2)(K)@12; Label: 13C(6)15N(2)(K)@13                                                                        | missed K-I@5; missed K-K@12 | 0.0154868   | 1537.92969 | 385.4897 | 1537.91419 | 385.485809 | 4 | 9  | 15.3858    | 3.80  |
| 16  | 48.74 | 50.75 | 67.3 CAMK2B_FlexIII    | 94.0 DLKPENLLASK                         | Label: 13C(6)15N(2)(K)@3; Label: 13C(6)15N(2)(K)@12                                                                                                   |                             | -0.0014868  | 1355.79785 | 452.9399 | 1355.79956 | 452.94046  | 3 | 9  | 17.2212    | 20.90 |
| 16  | 48.74 | 50.75 | 67.3 CAMK2B_FlexIII    | 94.0 GLTPPAALSDSSANTTIEDEDAK             | Deamidated(N)@15; Label: 13C(6)15N(2)(K)@24                                                                                                           |                             | -0.00360006 | 2440.11865 | 814.3801 | 2440.12207 | 814.381287 | 3 | 10 | 16.6708    | 20.90 |
| 9   | 54.6  | 56.93 | 78.8 MAT1A_FlexIII     | 94.0 ELLDVVHK                            | Label: 13C(6)15N(2)(K)@8                                                                                                                              |                             | -0.00088527 | 959.552246 | 480.7834 | 959.553101 | 480.783844 | 2 | 9  | 16.1619    | 26.98 |
| 49  | 33.63 | 37.69 | 49.1 TDG_FlexIII       | 94.0 IAVFNGKCIYEIFSKEVFGVK               | Deamidated(N)@5; Label: 13C(6)15N(2)(K)@7; Propionamide(C)@8; Label: 13C(6)15N(2)(K)@15; Label: 13C(6)15N(2)(K)@21                                    | missed K-C@7; missed K-E@15 | 0.0375824   | 2486.37207 | 622.6003 | 2486.33447 | 622.590942 | 4 | 10 | 20.3061    | 7.02  |
| 9   | 54.6  | 56.93 | 78.8 MAT1A_FlexIII     | 93.9 ELLDVVHK                            | Glu->pyro-Glu@N-term; Label: 13C(6)15N(2)(K)@8                                                                                                        |                             | 0.00427132  | 941.546875 | 471.7807 | 941.542542 | 471.778565 | 2 | 9  | 17.9641    | 26.98 |
| 9   | 54.6  | 56.93 | 78.8 MAT1A_FlexIII     | 93.9 YLDEDTVYVHLPQSGR                    | Label: 13C(6)15N(4)(R)@15                                                                                                                             |                             | -0.0113219  | 1801.8396  | 601.6205 | 1801.85107 | 601.624268 | 3 | 9  | 26.5421    | 26.98 |
| 9   | 54.6  | 56.93 |                        |                                          |                                                                                                                                                       |                             |             |            |          |            |            |   |    |            |       |

|    |       |       |                       |                                                 |                                                                                                                                     |                            |              |            |          |            |            |   |    |         |       |
|----|-------|-------|-----------------------|-------------------------------------------------|-------------------------------------------------------------------------------------------------------------------------------------|----------------------------|--------------|------------|----------|------------|------------|---|----|---------|-------|
| 10 | 53.11 | 55.13 | 57.4 TP53_FlexIII     | 93.4 KKPLDGEYFTLQIR                             | Label:13C(6)15N(2)(K)@1; Label:13C(6)15N(2)(K)@2; Label:13C(6)15N(4)(R)@14                                                          | missed K-K@1               | 2.41E-06     | 1732.97217 | 434.2503 | 1732.97217 | 434.250336 | 4 | 9  | 17.7344 | 9.55  |
| 10 | 53.11 | 55.13 | 57.4 TP53_FlexIII     | 93.4 RTEENLR                                    | Label:13C(6)15N(4)(R)@1; Label:13C(6)15N(4)(R)@8                                                                                    | missed R-T@1               | -0.00604365  | 1065.52564 | 533.7701 | 1065.53174 | 533.773193 | 2 | 7  | 9.8374  | 9.55  |
| 18 | 48.12 | 50.3  | 76.2 EVL_FlexIII      | 93.4 WVPIKPGQQGFSR                              | Label:13C(6)15N(2)(K)@5; Label:13C(6)15N(4)(R)@13                                                                                   |                            | 0.00039642   | 1516.82739 | 506.6164 | 1517.8269  | 506.616272 | 3 | 9  | 16.6674 | 16.66 |
| 46 | 36.36 | 38.64 | 86.3 HOXC11_FlexIII   | 93.3 EFFFFNVYIK                                 | Label:13C(6)15N(2)(K)@10                                                                                                            |                            | 0.00446297   | 1327.67371 | 664.8441 | 1327.66919 | 664.841858 | 2 | 9  | 19.9889 | 3.80  |
| 16 | 48.74 | 50.75 | 67.3 CAMK2B_FlexIII   | 93.2 NUNQMLTINPAKR                              | Oxidation(M)@6; Label:13C(6)15N(2)(K)@13; Label:13C(6)15N(4)(R)@14                                                                  | missed K-R@13              | -0.007660375 | 1658.91809 | 553.98   | 1658.92566 | 553.982483 | 3 | 9  | 16.9614 | 20.90 |
| 16 | 48.74 | 50.75 | 67.3 CAMK2B_FlexIII   | 93.2 NUNQMLTINPAKR                              | Label:13C(6)15N(2)(K)@13; Label:13C(6)15N(4)(R)@14                                                                                  | missed K-R@13              | -0.00054907  | 1642.93073 | 548.6507 | 1642.93079 | 548.650879 | 3 | 9  | 18.0004 | 20.90 |
| 42 | 38.57 | 40.97 | 55.8 MAPKAPK3_FlexIII | 93.1 LLYDSPK                                    | Label:13C(6)15N(2)(K)@7                                                                                                             |                            | -0.00090596  | 842.462097 | 422.2383 | 842.462891 | 422.238739 | 2 | 7  | 15.7251 | 15.68 |
| 14 | 50.19 | 52.2  | 65.0 HIF1A_N_FlexIII  | 93.1 FLYYDEKK                                   | Label:13C(6)15N(2)(K)@7; Label:13C(6)15N(2)(K)@8                                                                                    | missed K-K@7               | -0.00085236  | 1120.5769  | 561.2957 | 1120.57752 | 561.296082 | 2 | 8  | 15.8741 | 25.53 |
| 36 | 40.58 | 42.7  | 45.4 CSNK1D_FlexIII   | 93.0 MMGGVGQIPTIR                               | Label:13C(6)15N(4)(R)@12                                                                                                            |                            | 0.00200256   | 1268.66284 | 635.3387 | 1268.66089 | 635.337708 | 2 | 8  | 21.3723 | 14.60 |
| 36 | 40.58 | 42.7  | 45.4 CSNK1D_FlexIII   | 93.0 THQHYPYRENK                                | Label:13C(6)15N(4)(R)@8; Label:13C(6)15N(2)(K)@11                                                                                   | missed R-E@8               | -0.00212968  | 1439.73669 | 480.9195 | 1439.73889 | 480.920227 | 3 | 8  | 9.9204  | 14.60 |
| 31 | 41.62 | 43.81 | 59.6 LIMS1_FlexIII    | 93.0 ELKGELYCLPCHDK                             | Label:13C(6)15N(2)(K)@3; Propionamide(C)@8; Propionamide(C)@11; Label:13C(6)15N(2)(K)@14                                            | missed K-G@3               | -0.00356042  | 1804.87891 | 452.227  | 1804.88232 | 452.227844 | 4 | 9  | 16.3277 | 4.68  |
| 38 | 40.23 | 42.26 | 57.4 CDK4_FlexIII     | 93.0 EVALLR                                     | Label:13C(6)15N(4)(R)@6                                                                                                             |                            | 0.0099697    | 709.446045 | 355.7303 | 709.436218 | 355.725372 | 2 | 6  | 17.0351 | 14.73 |
| 33 | 41.31 | 43.51 | 73.9 CDCA7_FlexIII    | 92.9 AYPFTLYK                                   | Label:13C(6)15N(2)(K)@8                                                                                                             | cleaved Q-A@N-term         | 0.00863935   | 1009.54504 | 505.7798 | 1009.53644 | 505.775482 | 2 | 8  | 19.854  | 7.86  |
| 49 | 33.63 | 37.69 | 49.1 TDG_FlexIII      | 92.9 AYPFTLYK                                   | Label:13C(6)15N(2)(K)@8                                                                                                             | cleaved H-A@N-term         | 0.00863935   | 1009.54504 | 505.7798 | 1009.53644 | 505.775482 | 2 | 8  | 19.854  | 7.02  |
| 41 | 38.89 | 40.91 | 49.1 CASP9_FlexIII    | 92.9 ELFRPHMEDIQR                               | Label:13C(6)15N(4)(R)@4; Label:13C(6)15N(4)(R)@13                                                                                   |                            | 0.0168859    | 1702.88977 | 426.7297 | 1702.8728  | 426.725464 | 4 | 9  | 16.9951 | 23.69 |
| 41 | 38.89 | 40.91 | 49.1 CASP9_FlexIII    | 92.9 ELFRPHMEDIQR                               | Label:13C(6)15N(4)(R)@4; Label:13C(6)15N(4)(R)@13                                                                                   |                            | -0.00191292  | 1702.87097 | 426.725  | 1702.8728  | 426.725464 | 4 | 9  | 17.2628 | 23.69 |
| 41 | 38.89 | 40.91 | 49.1 CASP9_FlexIII    | 92.9 QLIDLETR                                   | Label:13C(6)15N(4)(R)@9                                                                                                             |                            | -0.00679668  | 1109.62524 | 555.8199 | 1109.63196 | 555.823303 | 2 | 7  | 21.3163 | 23.69 |
| 30 | 42.3  | 44.42 | 46.2 ZCCHC12_FlexIII  | 92.9 MYANEOER                                   | Label:13C(6)15N(4)(R)@8                                                                                                             |                            | 0.00235832   | 1049.44983 | 525.7322 | 1049.44751 | 525.731079 | 2 | 7  | 12.0689 | 11.45 |
| 31 | 41.62 | 43.81 | 59.6 LIMS1_FlexIII    | 92.9 HLRCPCNHR                                  | Propionamide(C)@3; Label:13C(6)15N(4)(R)@4; Propionamide(C)@6; Label:13C(6)15N(4)(R)@9                                              |                            | -0.0102134   | 1296.60938 | 325.1596 | 1296.61951 | 325.16214  | 4 | 7  | 7.4251  | 4.68  |
| 36 | 40.58 | 42.7  | 45.4 CSNK1D_FlexIII   | 92.8 KGNLVVIIDFLAK                              | Label:13C(6)15N(2)(K)@1; Label:13C(6)15N(2)(K)@14                                                                                   | missed K-G@1               | 0.00159713   | 1565.91699 | 522.9796 | 1565.91516 | 522.979004 | 3 | 10 | 19.8314 | 14.60 |
| 16 | 48.74 | 50.75 | 67.3 CAMK2B_FlexIII   | 92.8 ITAHEALKHPWVCQR                            | Label:13C(6)15N(2)(K)@8; Propionamide(C)@13; Label:13C(6)15N(4)(R)@15                                                               | missed K-H@8               | -0.01133037  | 1876.98352 | 376.404  | 1876.98496 | 376.404266 | 5 | 9  | 15.2621 | 20.90 |
| 16 | 48.74 | 50.75 | 67.3 CAMK2B_FlexIII   | 92.8 NSKPHITTLNPNHVHIGEDAACIAYIR                | Label:13C(6)15N(2)(K)@11; Propionamide(C)@23; Label:13C(6)15N(4)(R)@28                                                              |                            | 0.00203407   | 3171.66382 | 635.34   | 3171.66187 | 635.339661 | 5 | 10 | 17.5325 | 20.90 |
| 12 | 51.78 | 53.79 | 72.4 CSNK1A1L_FlexIII | 92.7 KIGSGSFGDVLGITTTNGEEVAVK                   | Label:13C(6)15N(2)(K)@1; Deamidated(N)@18; Label:13C(6)15N(2)(K)@25                                                                 | missed K-I@1               | 0.0072495    | 2558.31567 | 853.7792 | 2558.30859 | 853.776856 | 3 | 10 | 18.4397 | 9.79  |
| 9  | 54.6  | 56.93 | 78.8 MAT1A_FlexIII    | 92.7 FVIGGPGQDAGVTGR                            | Label:13C(6)15N(4)(R)@15                                                                                                            |                            | 0.00653862   | 1439.74622 | 720.8804 | 1439.73662 | 720.877075 | 2 | 7  | 24.1176 | 26.98 |
| 9  | 54.6  | 56.93 | 78.8 MAT1A_FlexIII    | 92.7 IHTIVISVQHNEITLEEMRR                       | Label:13C(6)15N(4)(R)@20; Label:13C(6)15N(4)(R)@21                                                                                  | missed R-R@20              | 0.00340036   | 2552.33154 | 511.4736 | 2552.32837 | 511.472961 | 5 | 10 | 18.1545 | 26.98 |
| 9  | 54.6  | 56.93 | 78.8 MAT1A_FlexIII    | 92.7 VLVQVSYAIGVAEPLSISIFTYGTOSKTER             | Deamidated(Q)@4; Label:13C(6)15N(2)(K)@27; Label:13C(6)15N(4)(R)@30                                                                 | missed K-T@27              | 0.032122     | 3274.77808 | 1092.6   | 3274.74561 | 1092.58911 | 3 | 10 | 26.5662 | 26.98 |
| 57 | 27.77 | 29.91 | 42.0 MAPK9_FlexIII    | 92.6 KLSRRFPQNTQHAH                             | Label:13C(6)15N(2)(K)@1; Label:13C(6)15N(4)(R)@4; Label:13C(6)15N(2)(K)@13                                                          | missed K-L@1               | -0.00137132  | 1579.87769 | 527.6332 | 1579.87927 | 527.633728 | 3 | 9  | 12.7486 | 2.36  |
| 14 | 50.19 | 52.2  | 65.0 HIF1A_N_FlexIII  | 92.5 GRYNVPTFLYK                                | Label:13C(6)15N(4)(R)@2; Label:13C(6)15N(2)(K)@11                                                                                   |                            | 0.0103176    | 1438.7467  | 480.5895 | 1438.73645 | 480.58609  | 3 | 9  | 17.8838 | 25.53 |
| 40 | 39.12 | 41.12 | 63.3 VASP_FlexIII     | 92.5 WPGWGLNFGSK                                | Label:13C(6)15N(2)(K)@10                                                                                                            |                            | -0.0105068   | 1142.58582 | 572.3002 | 1142.59644 | 572.305481 | 2 | 9  | 18.6044 | 4.96  |
| 60 | 26.43 | 28.47 | 59.7 FCRLA_FlexIII    | 92.4 EFSITVQVK                                  | Label:13C(6)15N(2)(K)@9                                                                                                             |                            | -0.00495281  | 1057.58484 | 529.7997 | 1057.58997 | 529.802246 | 2 | 7  | 23.981  | 41.77 |
| 9  | 54.6  | 56.93 | 78.8 MAT1A_FlexIII    | 92.4 SEFFWVEVPR                                 | Label:13C(6)15N(4)(R)@9                                                                                                             |                            | 0.00768219   | 1155.56653 | 578.7905 | 1155.55884 | 578.786682 | 2 | 8  | 26.4066 | 26.98 |
| 6  | 58.66 | 60.67 | 85.0 ARRB1_FlexIII    | 92.4 EILGIIVSYK                                 | Label:13C(6)15N(2)(K)@10                                                                                                            |                            | 0.00161582   | 1141.68543 | 571.85   | 1141.68384 | 571.849182 | 2 | 9  | 19.3547 | 18.42 |
| 22 | 45.72 | 47.76 | 72.9 BCKDK_FlexIII    | 92.3 YFLDKTLTSR                                 | Label:13C(6)15N(2)(K)@5; Label:13C(6)15N(4)(R)@10                                                                                   | missed K-T@5               | -0.013545    | 1260.66968 | 421.2305 | 1260.68335 | 421.235046 | 3 | 9  | 16.8287 | 2.26  |
| 10 | 53.11 | 55.13 | 57.4 TP53_FlexIII     | 92.3 QSOHMTFVVR                                 | Gln->pyro-Glu@N-term; Label:13C(6)15N(4)(R)@10; Label:13C(6)15N(4)(R)@11                                                            | missed R-R@10              | -0.00253703  | 1372.67578 | 458.5659 | 1372.67847 | 458.568773 | 3 | 9  | 14.8522 | 9.55  |
| 18 | 48.12 | 50.3  | 76.2 EVL_FlexIII      | 92.2 QVMEHQHQQR                                 | Gln->pyro-Glu@N-term; Oxidation(M)@3; Label:13C(6)15N(4)(R)@10                                                                      |                            | -0.00696834  | 1319.58472 | 660.7996 | 1319.59155 | 660.803101 | 2 | 6  | 11.5521 | 16.66 |
| 18 | 48.12 | 50.3  | 76.2 EVL_FlexIII      | 92.2 QVMEHQHQQR                                 | Gln->pyro-Glu@N-term; Oxidation(M)@3; Label:13C(6)15N(4)(R)@10                                                                      |                            | 0.00230898   | 1319.59412 | 660.8043 | 1319.59155 | 660.803101 | 2 | 6  | 11.999  | 16.66 |
| 24 | 45.3  | 47.31 | 60.7 WNT7A_FlexIII    | 92.2 GYNTHOYAR                                  | Label:13C(6)15N(4)(R)@9                                                                                                             |                            | -0.00045659  | 1118.51294 | 373.8449 | 1118.51331 | 373.845032 | 3 | 7  | 12.9622 | 13.38 |
| 25 | 44.51 | 46.56 | 50.8 CDK7_FlexIII     | 92.2 KLIFVPTFLYK                                | Label:13C(6)15N(2)(K)@1; Label:13C(6)15N(2)(K)@11                                                                                   | missed K-L@1               | -0.00074286  | 1447.84424 | 483.622  | 1447.84497 | 483.622284 | 3 | 9  | 19.5697 | 10.08 |
| 51 | 32.48 | 34.57 | 50.0 WNT2_FlexIII     | 92.1 HPDVMT                                     | Label:13C(6)15N(4)(R)@6                                                                                                             |                            | 0.00042453   | 763.367859 | 382.6912 | 763.367432 | 382.69101  | 2 | 7  | 10.2302 | 11.83 |
| 21 | 45.74 | 47.74 | 45.3 BAIAP2_FlexIII   | 92.1 GWFPFSYTR                                  | Label:13C(6)15N(4)(R)@9                                                                                                             |                            | 0.00046395   | 1169.55383 | 585.7842 | 1169.55335 | 585.783936 | 2 | 8  | 19.8654 | 1.93  |
| 6  | 58.66 | 60.67 | 85.0 ARRB1_FlexIII    | 92.0 IKISVR                                     | Label:13C(6)15N(2)(K)@2; Label:13C(6)15N(4)(R)@6                                                                                    | missed K-I@2               | 0.00653134   | 732.504273 | 367.2594 | 732.497681 | 367.256104 | 2 | 7  | 14.9504 | 18.42 |
| 45 | 37.2  | 41.27 | 48.7 CDC2L5_FlexIII   | 92.0 MLPEDKEADSLR                               | Label:13C(6)15N(2)(K)@6; Label:13C(6)15N(4)(R)@12                                                                                   | missed K-E@6               | -0.0108338   | 1420.68877 | 474.5699 | 1420.68973 | 474.573517 | 3 | 9  | 15.5073 | 12.09 |
| 65 | 25.39 | 29.86 | 33.5 BAIAP2L2_FlexIII | 92.0 SSMGSTAVATDVKK                             | Label:13C(6)15N(2)(K)@13; Label:13C(6)15N(2)(K)@14                                                                                  | missed K-K@13              | -0.00056519  | 1396.71973 | 466.5805 | 1396.72034 | 466.580689 | 3 | 9  | 14.1617 | 0.51  |
| 10 | 53.11 | 55.13 | 57.4 TP53_FlexIII     | 92.0 DRRTEENLR                                  | Label:13C(6)15N(4)(R)@2; Label:13C(6)15N(4)(R)@3; Label:13C(6)15N(4)(R)@10                                                          | missed R-R@2; missed R-T@3 | 0.0104143    | 1346.67847 | 449.9001 | 1346.66809 | 449.896637 | 3 | 7  | 10.5818 | 9.55  |
| 41 | 38.89 | 40.91 | 49.1 CASP9_FlexIII    | 92.0 QMPGCFNFLR                                 | Gln->pyro-Glu@N-term; Propionamide(C)@5; Label:13C(6)15N(4)(R)@10                                                                   |                            | 0.00016372   | 1275.57703 | 638.7958 | 1275.57678 | 638.795654 | 2 | 9  | 20.4917 | 23.69 |
| 32 | 41.57 | 43.64 | 69.8 BMP7_FlexIII     | 91.9 AVFSTOGPLASLQDSHFLTDADMVMSFVNLVHDEKFEFFHPR | Deamidated(N)@30; Label:13C(6)15N(2)(K)@36; Label:13C(6)15N(4)(R)@42                                                                | missed K-E@36              | 0.0147072    | 4778.30518 | 797.3915 | 4778.29053 | 797.389038 | 6 | 10 | 20.4405 | 17.44 |
| 1  | 72.1  | 72.1  | 60.4 RNFB_FlexIII     | 91.8 KIECPICR                                   | Label:13C(6)15N(2)(K)@1; Propionamide(C)@4; Propionamide(C)@7; Label:13C(6)15N(4)(R)@8                                              | missed K-I@1               | 0.0151933    | 1120.60034 | 374.5407 | 1120.58521 | 374.535675 | 3 | 8  | 14.9976 | 17.06 |
| 13 | 50.86 | 52.87 | 65.6 IL16_FlexIII     | 91.8 TSDDGSSPDKEYDPDFEISLAQK                    | Label:13C(6)15N(2)(K)@11; Deamidated(Q)@22; Label:13C(6)15N(2)(K)@24                                                                | missed K-Y@11              | 0.0292373    | 2599.20728 | 1300.611 | 2599.17487 | 1300.59644 | 2 | 10 | 18.3159 | 13.95 |
| 5  | 59.76 | 61.76 | 81.6 2-SEP_FlexIII    | 91.8 HUIDNRVHCCFYFISPFPGHGLKPLDAVFMK            | Deamidated(N)@5; Label:13C(6)15N(4)(R)@6; Propionamide(C)@9; Propionamide(C)@10; Label:13C(6)15N(2)(K)@22; Label:13C(6)15N(4)(R)@23 | missed R-V@6               | 0.0203092    | 3672.86133 | 735.5795 | 3672.84058 | 735.575378 | 5 | 10 | 19.2845 | NA    |
| 37 | 40.52 | 46.67 | 40.3 PRKACB_FlexIII   | 91.8 QIEHTLNEK                                  | Gln->pyro-Glu@N-term                                                                                                                |                            | -0.00512598  | 1093.53528 | 547.7749 | 1093.54041 | 547.777466 | 2 | 9  | 15.5295 | 9.90  |
| 6  | 58.66 | 60.67 | 85.0 ARRB1_FlexIII    | 91.7 RYVYTLTCAFR                                | Label:13C(6)15N(4)(R)@1; Propionamide(C)@8; Label:13C(6)15N(4)(R)@11                                                                | missed R-V@1               | 0.00205308   | 1418.7627  | 473.9282 | 1418.76074 | 473.927521 | 3 | 8  | 26.5518 | 18.42 |
| 52 | 31.37 | 33.43 | 67.9 MMP28_FlexIII    | 91.7 RGEAHFDODER                                | Label:13C(6)15N(4)(R)@1; Deamidated(Q)@8; Label:13C(6)15N(4)(R)@11                                                                  |                            | 0.01111273   | 1379.5957  | 460.8725 | 1379.59692 | 460.872894 | 3 | 9  | 12.8049 | 2.09  |
| 65 | 25.39 | 29.86 | 33.5 BAIAP2L2_FlexIII | 91.7 HDSGSGYPTDPARPASOLEPDRR                    | Label:13C(6)15N(4)(R)@13; Deamidated(Q)@17; Label:13C(6)15N(4)(R)@22; Label:13C(6)15N(4)(R)@23                                      | missed R-R@22              | 0.00680966   | 2513.17407 | 629.3008 | 2513.16724 | 629.299133 | 4 | 10 | 14.4453 | 0.51  |
| 42 | 38.57 | 40.97 | 55.8 MAPKAPK3_FlexIII | 91.7 LTFDYGK                                    |                                                                                                                                     |                            | -0.00059126  | 897.459045 | 449.7368 | 897.459595 | 449.737091 | 2 | 8  | 17.6228 | 15.68 |
| 76 | 18.62 | 20.7  | 20.8 TNFRSF1A_FlexIII | 91.6 EVAPPYQGDAPILATALASDPIPNPLQK               | Deamidated(N)@24; Label:13C(6)15N(2)(K)@28                                                                                          |                            | 0.0156759    | 2894.53149 | 965.8511 | 2894.51563 | 965.845825 | 3 | 10 | 20.2973 | 1.24  |
| 2  | 66.54 | 68.54 | 65.5 FZR1_FlexIII     | 91.6 IRYPTFLYK                                  | Label:13C(6)15N(4)(R)@2; Label:13C(6)15N(2)(K)@9                                                                                    | missed R-Y@2               | 0.00043049   | 1217.69312 | 406.905  | 1217.69275 | 406.904846 | 3 | 9  | 17.6592 | 12.66 |
| 5  | 59.76 | 61.76 | 81.6 2-SEP_FlexIII    | 91.6 MQEMIAR                                    | Label:13C(6)15N(4)(R)@7                                                                                                             |                            | 0.0016542    | 887.424866 | 444.7197 |            |            |   |    |         |       |

|    |       |       |                       |                                       |                                                                                                         |                                  |             |            |          |            |            |   |    |         |       |
|----|-------|-------|-----------------------|---------------------------------------|---------------------------------------------------------------------------------------------------------|----------------------------------|-------------|------------|----------|------------|------------|---|----|---------|-------|
| 74 | 19.77 | 22.05 | 31.7 CD2_Flexiil      | 91.1 SQAPSHRPPPPGHR                   | Label: 13C(6)15N(4)(R)@7; Label: 13C(6)15N(4)(R)@14                                                     |                                  | -0.00042991 | 1539.79175 | 514.2712 | 1539.79224 | 514.271362 | 3 | 9  | 7.4466  | 11.54 |
| 74 | 19.77 | 22.05 | 31.7 CD2_Flexiil      | 91.1 VOHQPKRPPAPSGTOVHQQK             | Deamidated(Q)@6; Label: 13C(6)15N(2)(K)@7; Label: 13C(6)15N(4)(R)@8; Label: 13C(6)15N(2)(K)@21          | missed K-R@7                     | 0.0347518   | 2402.3125  | 481.4698 | 2402.27783 | 481.46283  | 5 | 10 | 9.267   | 11.54 |
| 74 | 19.77 | 22.05 | 31.7 CD2_Flexiil      | 91.1 VOHQPKRPPAPSGTOVHQQK             | Deamidated(Q)@6; Label: 13C(6)15N(2)(K)@7; Label: 13C(6)15N(4)(R)@8; Label: 13C(6)15N(2)(K)@21          | missed K-R@7                     | 0.0347518   | 2402.3125  | 481.4698 | 2402.27783 | 481.46283  | 5 | 10 | 10.0616 | 11.54 |
| 22 | 45.72 | 47.76 | 72.9 BCKDK_Flexiil    | 91.0 STSATDTHHVEMAR                   | Label: 13C(6)15N(4)(R)@14                                                                               |                                  | -0.00143561 | 1551.69617 | 518.2393 | 1551.69751 | 518.239807 | 3 | 9  | 13.1289 | 2.26  |
| 41 | 38.89 | 40.91 | 49.1 CASP9_Flexiil    | 90.9 TSYPTFLYK                        | Label: 13C(6)15N(2)(K)@9                                                                                |                                  | 0.00616981  | 1126.58533 | 564.2999 | 1126.57898 | 564.296753 | 2 | 7  | 23.5358 | 23.69 |
| 2  | 66.54 | 68.54 | 65.5 FZR1_Flexiil     | 90.9 IRYPTFLYK                        | Label: 13C(6)15N(4)(R)@2; Label: 13C(6)15N(2)(K)@9                                                      | missed R-Y@2                     | -0.00167523 | 1217.69104 | 406.9043 | 1217.69275 | 406.904846 | 4 | 9  | 17.9348 | 12.66 |
| 65 | 25.39 | 29.86 | 33.5 BAIAP2L2_Flexiil | 90.9 IRYPTFLYK                        | Label: 13C(6)15N(4)(R)@2; Label: 13C(6)15N(2)(K)@9                                                      | cleaved L-I@N-term; missed R-Y@2 | -0.00167523 | 1217.69104 | 406.9043 | 1217.69275 | 406.904846 | 3 | 9  | 17.9348 | 0.51  |
| 90 | 12.01 | 18.01 | 33.3 SRGAP3_Flexiil   | 90.9 RLYPTFLYK                        | Label: 13C(6)15N(4)(R)@1; Label: 13C(6)15N(2)(K)@9                                                      | cleaved P-R@N-term; missed R-L@1 | -0.00167523 | 1217.69104 | 406.9043 | 1217.69275 | 406.904846 | 2 | 7  | 17.9348 | 0.68  |
| 60 | 26.43 | 28.47 | 59.7 FCRLA_Flexiil    | 90.8 EFSITVQVK                        | Label: 13C(6)15N(2)(K)@9                                                                                |                                  | -0.00495281 | 1057.58484 | 529.7997 | 1057.58997 | 529.802246 | 2 | 7  | 22.1011 | 41.77 |
| 60 | 26.43 | 28.47 | 59.7 FCRLA_Flexiil    | 90.8 LLFSFYK                          | Label: 13C(6)15N(2)(K)@7                                                                                |                                  | -0.00060197 | 924.51947  | 463.267  | 924.52002  | 463.267304 | 2 | 7  | 19.5238 | 41.77 |
| 22 | 45.72 | 47.76 | 72.9 BCKDK_Flexiil    | 90.8 STSATDTHHVEMAR                   |                                                                                                         |                                  | 0.00399262  | 1541.69336 | 386.4306 | 1541.68921 | 386.429596 | 4 | 9  | 12.504  | 2.26  |
| 22 | 45.72 | 47.76 | 72.9 BCKDK_Flexiil    | 90.8 TVTSFYNSAIDAAAEKPSVR             | Deamidated(N)@7; Label: 13C(6)15N(2)(K)@17; Label: 13C(6)15N(4)(R)@21                                   |                                  | 0.00795578  | 2273.13745 | 758.7197 | 2273.1294  | 758.717102 | 3 | 8  | 21.3907 | 2.26  |
| 1  | 72.1  | 72.1  | 60.4 RNFB_Flexiil     | 90.8 TFQEEELHQLGLEIAQGEK              | Deamidated(Q)@10; Label: 13C(6)15N(2)(K)@19                                                             |                                  | -0.0078277  | 2222.05029 | 741.6907 | 2222.05835 | 741.693359 | 3 | 10 | 17.5651 | 17.06 |
| 15 | 49.13 | 51.13 | 73.0 SRGAP1_Flexiil   | 90.7 STVSEYLSKPSIAKR                  | Label: 13C(6)15N(2)(K)@10; Label: 13C(6)15N(2)(K)@15; Label: 13C(6)15N(4)(R)@16                         | missed K-R@15                    | 0.0042514   | 1791.99829 | 598.34   | 1791.99414 | 598.338623 | 3 | 9  | 15.4129 | 3.80  |
| 31 | 41.62 | 43.81 | 59.6 LIMS1_Flexiil    | 90.7 AMNNSWHPECFR                     | Deamidated(N)@4; Propionamide(C)@10; Label: 13C(6)15N(4)(R)@12                                          |                                  | -0.0091187  | 1572.63879 | 525.2202 | 1572.64771 | 525.223206 | 3 | 9  | 16.9976 | 4.68  |
| 31 | 41.62 | 43.81 | 59.6 LIMS1_Flexiil    | 90.7 CHAIDEOPLIFK                     | Propionamide(C)@1; Label: 13C(6)15N(2)(K)@13                                                            |                                  | -0.00018588 | 1604.84753 | 803.431  | 1604.84766 | 803.431091 | 2 | 7  | 21.505  | 4.68  |
| 74 | 19.77 | 22.05 | 31.7 CD2_Flexiil      | 90.8 RPPAPSGTVHQQK                    | Label: 13C(6)15N(4)(R)@1; Label: 13C(6)15N(2)(K)@14                                                     |                                  | -0.0180431  | 1547.81091 | 387.96   | 1547.82874 | 387.964447 | 4 | 9  | 8.6173  | 11.54 |
| 25 | 44.51 | 46.56 | 50.8 CDK7_Flexiil     | 90.5 AYTHQVIVTR                       | Label: 13C(6)15N(4)(R)@9                                                                                |                                  | 0.00953985  | 1083.57971 | 362.2005 | 1083.57007 | 362.197296 | 3 | 8  | 13.3825 | 10.08 |
| 51 | 32.48 | 34.57 | 50.0 WNT2_Flexiil     | 90.5 HPDVMR                           | Label: 13C(6)15N(4)(R)@6                                                                                |                                  | 0.00060763  | 763.368103 | 382.6913 | 763.367432 | 382.69101  | 2 | 7  | 10.4919 | 11.83 |
| 68 | 22.06 | 24.16 | 23.2 FSCN3_Flexiil    | 90.5 SFLVLR                           | Label: 13C(6)15N(4)(R)@6                                                                                |                                  | -0.00311023 | 743.453857 | 372.7342 | 743.456909 | 372.735748 | 2 | 7  | 18.1035 | 1.45  |
| 61 | 26.19 | 28.33 | 39.3 CEACAM1_Flexiil  | 90.4 TLTLSVTR                         | Label: 13C(6)15N(2)(K)@9                                                                                |                                  | -0.0087192  | 1012.60687 | 507.3107 | 1012.6156  | 507.315094 | 2 | 8  | 22.1172 | 25.32 |
| 10 | 53.11 | 55.13 | 57.4 TP53_Flexiil     | 90.3 HSVVPVPEPVSGDCTTHYNYMNCSSCMGMMNR | Propionamide(C)@16; Deamidated(N)@22; Propionamide(C)@25; Propionamide(C)@29; Label: 13C(6)15N(4)(R)@35 |                                  | 0.0143014   | 4100.73047 | 1026.19  | 4100.7168  | 1026.18652 | 4 | 8  | 26.699  | 9.55  |
| 10 | 53.11 | 55.13 | 57.4 TP53_Flexiil     | 90.3 KGEPHIELPPGSKTR                  | Label: 13C(6)15N(2)(K)@1; Label: 13C(6)15N(2)(K)@14; Label: 13C(6)15N(4)(R)@15                          | missed K-G@1; missed K-R@14      | 0.00788247  | 1694.91419 | 339.9901 | 1694.90625 | 339.988525 | 5 | 8  | 7.8798  | 9.55  |
| 49 | 33.63 | 37.69 | 49.1 TDG_Flexiil      | 90.3 CAQFPR                           | Propionamide(C)@1; Label: 13C(6)15N(4)(R)@6                                                             |                                  | -0.00073816 | 801.382446 | 401.6985 | 801.383118 | 401.698822 | 2 | 7  | 14.9976 | 7.02  |
| 35 | 40.71 | 42.76 | 46.9 SP100_Flexiil    | 90.2 SGLQLSLEOGTGENSFR                | Label: 13C(6)15N(4)(R)@17                                                                               |                                  | 0.0310217   | 1831.92505 | 916.9698 | 1831.89392 | 916.954285 | 2 | 9  | 26.4235 | 15.89 |
| 8  | 55.19 | 57.27 | 53.1 CALU_Flexiil     | 90.1 EQFVEFR                          | Label: 13C(6)15N(4)(R)@7                                                                                |                                  | -0.0047285  | 963.464294 | 482.7394 | 963.468933 | 482.74176  | 2 | 7  | 17.2504 | 7.97  |
| 76 | 18.62 | 20.7  | 20.8 TNFRSF1A_Flexiil | 90.3 REVAPPYOGADPILATASDPINPLOK       | Label: 13C(6)15N(4)(R)@1; Deamidated(N)@25; Label: 13C(6)15N(2)(K)@29                                   | missed R-E@1                     | 0.0167332   | 3060.64111 | 1021.221 | 3060.625   | 1021.21564 | 3 | 10 | 20.0708 | 1.24  |
| 61 | 26.19 | 28.33 | 39.3 CEACAM1_Flexiil  | 90.0 LQLSNGNR                         | Deamidated(N)@5; Label: 13C(6)15N(4)(R)@8                                                               |                                  | -0.00023545 | 911.469849 | 456.7422 | 911.470032 | 456.742279 | 2 | 9  | 14.7403 | 25.32 |
| 17 | 48.68 | 50.69 | 56.7 PRKACG_Flexiil   | 90.6 ARGDFLYR                         | Label: 13C(6)15N(4)(R)@2; Label: 13C(6)15N(4)(R)@8                                                      | missed R-G@2                     | -0.00245303 | 1016.5282  | 339.85   | 1016.53064 | 339.85083  | 3 | 8  | 15.7859 | 16.57 |
| 16 | 48.74 | 50.75 | 67.3 CAMK2B_Flexiil   | 90.0 DLKPENLLASAK                     | Label: 13C(6)15N(2)(K)@3; Label: 13C(6)15N(2)(K)@12                                                     |                                  | 0.00594655  | 1355.80542 | 678.91   | 1355.79956 | 678.907044 | 2 | 8  | 20.8339 | 20.90 |
| 16 | 48.74 | 50.75 | 67.3 CAMK2B_Flexiil   | 90.0 EYSEADASHCQIQLEAVLHCHQMGMVVHR    | Propionamide(C)@11; Deamidated(Q)@14; Propionamide(C)@22; Oxidation(M)@25; Label: 13C(6)15N(4)(R)@30    |                                  | 0.0331759   | 3634.69629 | 606.79   | 3634.66309 | 606.784485 | 6 | 10 | 20.1405 | 20.90 |
| 36 | 40.58 | 42.7  | 45.4 CSNK1D_Flexiil   | 89.9 THQHPIYR                         | Label: 13C(6)15N(4)(R)@8; Label: 13C(6)15N(2)(K)@11                                                     | missed R-E@8                     | -0.00201943 | 1050.53381 | 351.1852 | 1050.53589 | 351.185913 | 3 | 7  | 12.7108 | 14.60 |
| 36 | 40.58 | 42.7  | 45.4 CSNK1D_Flexiil   | 89.9 THQHPIYRENK                      |                                                                                                         |                                  | -0.00266056 | 1439.73621 | 360.9413 | 1439.73889 | 360.941986 | 4 | 8  | 9.9745  | 14.60 |
| 5  | 59.76 | 61.76 | 81.6 2-SEP_Flexiil    | 89.9 MQEMIAR                          |                                                                                                         |                                  | 0.00096067  | 877.415894 | 439.7152 | 877.414978 | 439.714783 | 2 | 8  | 15.1233 | NA    |
| 14 | 50.19 | 52.2  | 65.0 HIF1AN_Flexiil   | 89.8 RIEYPLK                          | Label: 13C(6)15N(4)(R)@1; Label: 13C(6)15N(2)(K)@7                                                      | missed R-I@1                     | -0.00206192 | 935.554016 | 312.8586 | 935.555908 | 312.859253 | 3 | 7  | 15.4311 | 25.53 |
| 42 | 38.57 | 40.97 | 55.8 MAPKAPK3_Flexiil | 89.8 LTDFGFAK                         | Label: 13C(6)15N(2)(K)@8                                                                                |                                  | -0.00099548 | 905.4729   | 453.7437 | 905.473816 | 453.744171 | 2 | 8  | 17.7774 | 15.68 |
| 42 | 38.57 | 40.97 | 55.8 MAPKAPK3_Flexiil | 89.8 VDDYQVKV                         | Label: 13C(6)15N(2)(K)@7                                                                                |                                  | -0.00054342 | 873.431885 | 437.7232 | 873.432373 | 437.72345  | 2 | 8  | 14.298  | 15.68 |
| 29 | 42.79 | 44.97 | 59.5 PBK_Flexiil      | 89.7 INPICNDHYR                       | Propionamide(C)@5; Label: 13C(6)15N(4)(R)@10                                                            |                                  | -0.00142526 | 1324.62061 | 442.5475 | 1324.62219 | 442.548004 | 3 | 9  | 15.0318 | 17.23 |
| 67 | 22.59 | 26.91 | 26.5 HCK_Flexiil      | 90.7 VDSLETEEWWFK                     | Label: 13C(6)15N(2)(K)@12                                                                               |                                  | 0.00259053  | 1536.72522 | 769.3699 | 1536.72278 | 769.368652 | 2 | 9  | 19.8708 | 0.80  |
| 40 | 39.12 | 41.12 | 63.3 VASP_Flexiil     | 89.6 ATVMLYDDGNKR                     | Label: 13C(6)15N(2)(K)@11; Label: 13C(6)15N(4)(R)@12                                                    | missed K-R@11                    | -0.0017047  | 1399.68665 | 467.5695 | 1399.68848 | 467.570099 | 3 | 9  | 15.8791 | 4.96  |
| 9  | 54.6  | 56.93 | 78.8 MAT1A_Flexiil    | 89.4 TACYGHGFR                        | Propionamide(C)@3; Label: 13C(6)15N(4)(R)@9                                                             |                                  | 0.00077037  | 1091.48523 | 364.8357 | 1091.48462 | 364.83548  | 3 | 8  | 14.9751 | 26.98 |
| 16 | 48.74 | 50.75 | 67.3 CAMK2B_Flexiil   | 89.4 EYSEADASHCQIQLEAVLHCHQMGMVVHR    | Propionamide(C)@11; Deamidated(Q)@14; Propionamide(C)@22; Label: 13C(6)15N(4)(R)@30                     |                                  | -0.00433799 | 3618.66406 | 724.7401 | 3618.66218 | 724.740906 | 5 | 10 | 26.654  | 20.90 |
| 25 | 44.51 | 46.56 | 50.8 CDK7_Flexiil     | 89.3 LADFGLAK                         | Label: 13C(6)15N(2)(K)@8                                                                                |                                  | 0.00793742  | 841.486877 | 421.7507 | 841.478882 | 421.746735 | 2 | 8  | 17.7158 | 10.08 |
| 38 | 40.23 | 42.26 | 57.4 CDK4_Flexiil     | 89.3 EVALLR                           | Label: 13C(6)15N(4)(R)@6                                                                                |                                  | -0.0100498  | 709.426096 | 355.7203 | 709.436218 | 355.725372 | 2 | 6  | 16.7696 | 14.73 |
| 13 | 50.86 | 52.87 | 65.6 IL16_Flexiil     | 89.0 IFFMK                            | Label: 13C(6)15N(2)(K)@5                                                                                |                                  | -0.00194792 | 692.379273 | 347.1969 | 692.381104 | 347.197815 | 2 | 6  | 18.1559 | 13.95 |
| 40 | 39.12 | 41.12 | 63.3 VASP_Flexiil     | 88.9 WLPAGTGPOAFSR                    |                                                                                                         |                                  | 0.00188811  | 1386.7063  | 694.3604 | 1386.70447 | 694.359497 | 2 | 9  | 17.8494 | 4.96  |
| 40 | 39.12 | 41.12 | 63.3 VASP_Flexiil     | 88.9 YNQATPNFHQWR                     |                                                                                                         |                                  | 0.00125194  | 1560.72339 | 521.2484 | 1560.72217 | 521.247986 | 3 | 9  | 16.5495 | 4.96  |
| 21 | 45.74 | 47.74 | 45.3 BAIAP2_Flexiil   | 88.9 GWFPPFSYTR                       | Label: 13C(6)15N(4)(R)@9                                                                                |                                  | -0.00588373 | 1169.54749 | 585.781  | 1169.55335 | 585.783936 | 2 | 8  | 19.5853 | 1.93  |
| 1  | 72.6  | 72.6  | 57.2 ZAP70_Flexiil    | 90.0 ALGADDSYVTAR                     | Label: 13C(6)15N(4)(R)@12                                                                               |                                  | 0.00957008  | 1311.60669 | 656.8106 | 1311.59705 | 656.805786 | 2 | 15 | 13.0088 | 34.38 |
| 1  | 72.6  | 72.6  | 57.2 ZAP70_Flexiil    | 90.0 AYTPTFLYK                        | Label: 13C(6)15N(2)(K)@8                                                                                | cleaved C-A@N-term               | 0.00028802  | 1009.53668 | 505.7756 | 1009.53644 | 505.775482 | 2 | 10 | 15.0379 | 34.38 |
| 1  | 72.6  | 72.6  | 57.2 ZAP70_Flexiil    | 90.0 DNLLADIELGCGNFGSVR               | Propionamide(C)@12; Label: 13C(6)15N(4)(R)@19                                                           |                                  | -0.00165395 | 2086.03735 | 1044.026 | 2086.03931 | 1044.02686 | 2 | 26 | 17.5551 | 34.38 |
| 1  | 72.6  | 72.6  | 57.2 ZAP70_Flexiil    | 90.0 EAQIMHQLDNPYIVR                  | Label: 13C(6)15N(4)(R)@15                                                                               |                                  | -0.00383625 | 1835.91882 | 918.9667 | 1835.92273 | 918.968689 | 2 | 21 | 15.0204 | 34.38 |
| 1  | 72.6  | 72.6  | 57.2 ZAP70_Flexiil    | 90.0 FLRLPR                           | Label: 13C(6)15N(4)(R)@4; Label: 13C(6)15N(4)(R)@6                                                      |                                  | 0.00771481  | 820.526245 | 411.2704 | 820.518616 | 411.266602 | 2 | 9  | 13.0761 | 34.38 |
| 1  | 72.6  | 72.6  | 57.2 ZAP70_Flexiil    | 90.0 GPEVMAFIEQ GK                    | Label: 13C(6)15N(2)(K)@12                                                                               |                                  | 0.00352789  | 1312.66126 | 657.3379 | 1312.65772 | 657.336121 | 2 | 13 | 15.6989 | 34.38 |
| 1  | 72.6  | 72.6  | 57.2 ZAP70_Flexiil    | 90.0 GPEVMAFIEQ GK                    | Label: 13C(6)15N(2)(K)@12; Label: 13C(6)15N(4)(R)@13                                                    | missed K-R@12                    | 0.00261393  | 1478.76965 | 493.9305 | 1478.76709 | 493.929627 | 3 | 12 | 16.6392 | 34.38 |
| 1  | 72.6  | 72.6  | 57.2 ZAP70_Flexiil    | 90.0 IDTLNSDGYTEPPAR                  | Label: 13C(6)15N(4)(R)@15                                                                               |                                  | 0.00458067  | 1657.78687 | 829.9007 | 1657.78235 | 829.898438 | 2 | 18 | 13.3388 | 34.38 |
| 1  | 72.6  | 72.6  | 57.2 ZAP70_Flexiil    | 90.0 ISDFGLSK                         | Label: 13C(6)15N(2)(K)@8                                                                                |                                  | 8.61E-05    | 873.468872 | 437.7417 | 873.46875  | 437.741638 | 2 | 10 | 13.7882 | 34.38 |
| 1  | 72.6  | 72.6  | 57.2 ZAP70_Flexiil    | 90.0 KEQGTVALSLIYK                    | Label: 13C(6)15N(2)(K)@1; Label: 13C(6)15N(2)(K)@14                                                     | missed K-E@1                     | -0.00274001 | 1585.86597 | 529.6293 | 1585.86865 | 529.630188 | 3 | 15 | 15.9056 | 34.38 |
| 1  | 72.6  | 72.6  | 57.2 ZAP70_Flexiil    | 90.0 KQIDVIAK                         | Label: 13C(6)15N(2)(K)@1; Label: 13C(6)15N(2)(K)@2; Label: 13C(6)15N(2)(K)@9                            | missed K-K@1; missed K-Q@2       | 0.00220311  | 1065.69934 | 356.2404 | 1065.69727 | 356.239854 | 3 | 10 | 11      |       |

|   |      |      |                    |                                     |                                                                                             |                             |             |            |          |            |            |   |    |         |       |
|---|------|------|--------------------|-------------------------------------|---------------------------------------------------------------------------------------------|-----------------------------|-------------|------------|----------|------------|------------|---|----|---------|-------|
| 1 | 72.6 | 72.6 | 57.2 ZAP70_FlexIII | 99.0 NVLLVNR                        | Label:13C(6)15N(4)(R)@7                                                                     |                             | -0.0003926  | 836.510498 | 419.2625 | 836.510742 | 419.262665 | 2 | 9  | 13.6635 | 34.38 |
| 1 | 72.6 | 72.6 | 57.2 ZAP70_FlexIII | 99.0 QGTEKADTEEMMR                  | Gln->pyro-Glu@N-term: Label:13C(6)15N(2)(K)@5; Label:13C(6)15N(4)(R)@13                     | missed K-A@5                | -0.00177251 | 1525.64905 | 763.8318 | 1525.65076 | 763.832642 | 2 | 19 | 12.6816 | 34.38 |
| 1 | 72.6 | 72.6 | 57.2 ZAP70_FlexIII | 99.0 QIDVAIK                        | Gln->pyro-Glu@N-term: Label:13C(6)15N(2)(K)@7                                               |                             | -0.00598914 | 776.446472 | 389.2305 | 776.452332 | 389.23346  | 2 | 9  | 14.9843 | 34.38 |
| 1 | 72.6 | 72.6 | 57.2 ZAP70_FlexIII | 99.0 REEIPVSNVALLHQVSMGMK           | Label:13C(6)15N(4)(R)@1; Deamidated(N)@8; Label:13C(6)15N(2)(K)@21                          | missed R-E@1                | 0.000512094 | 2385.22022 | 796.0807 | 2385.21509 | 796.07898  | 3 | 16 | 18.058  | 34.38 |
| 1 | 72.6 | 72.6 | 57.2 ZAP70_FlexIII | 99.0 RIDTLNSDGYTPEPAR               | Label:13C(6)15N(4)(R)@1; Label:13C(6)15N(4)(R)@16                                           | missed R-I@1                | -0.0047318  | 1823.88684 | 912.9507 | 1823.89172 | 912.953125 | 2 | 25 | 12.9241 | 34.38 |
| 1 | 72.6 | 72.6 | 57.2 ZAP70_FlexIII | 99.0 SAGKWPLK                       | Label:13C(6)15N(2)(K)@4; Label:13C(6)15N(2)(K)@8                                            | missed K-W@4                | -0.00063953 | 901.535095 | 451.7748 | 901.535645 | 451.775085 | 2 | 12 | 12.7825 | 34.38 |
| 1 | 72.6 | 72.6 | 57.2 ZAP70_FlexIII | 99.0 TVYHYLISODK                    | Label:13C(6)15N(2)(K)@11                                                                    |                             | -0.00017707 | 1373.70691 | 687.8607 | 1373.70703 | 687.860779 | 2 | 16 | 13.6647 | 34.38 |
| 1 | 72.6 | 72.6 | 57.2 ZAP70_FlexIII | 99.0 TVYHYLISODKAGK                 | Label:13C(6)15N(2)(K)@11; Label:13C(6)15N(2)(K)@14                                          | missed K-A@11               | 0.0179719   | 1637.89294 | 410.4805 | 1637.87476 | 410.475983 | 4 | 12 | 12.9871 | 34.38 |
| 1 | 72.6 | 72.6 | 57.2 ZAP70_FlexIII | 99.0 VEGPPGSTQK                     | Label:13C(6)15N(2)(K)@10                                                                    |                             | 0.00097911  | 1006.51849 | 504.2665 | 1006.51746 | 504.266022 | 2 | 11 | 9.459   | 34.38 |
| 1 | 72.6 | 72.6 | 57.2 ZAP70_FlexIII | 99.0 VLKQTEKADTEEMMR                | Label:13C(6)15N(2)(K)@3; Label:13C(6)15N(2)(K)@8; Label:13C(6)15N(4)(R)@16                  | missed K-Q@3; missed K-A@8  | 0.00098768  | 1890.94006 | 631.3206 | 1890.93897 | 631.320252 | 3 | 13 | 11.9971 | 34.38 |
| 1 | 72.6 | 72.6 | 57.2 ZAP70_FlexIII | 99.0 WEDRPDLTVEQR                   | Label:13C(6)15N(4)(R)@4; Label:13C(6)15N(4)(R)@13                                           |                             | -0.00079666 | 1709.8269  | 855.9207 | 1709.82764 | 855.921082 | 2 | 16 | 16.3189 | 34.38 |
| 1 | 72.6 | 72.6 | 57.2 ZAP70_FlexIII | 99.0 WYAEPCINFR                     | Propionamide(C)@6; Label:13C(6)15N(4)(R)@10                                                 |                             | -0.0100701  | 1378.62671 | 690.3206 | 1378.63672 | 690.325684 | 2 | 11 | 15.4543 | 34.38 |
| 1 | 72.6 | 72.6 | 57.2 ZAP70_FlexIII | 99.0 YPTFLYK                        | Label:13C(6)15N(2)(K)@7                                                                     | cleaved A-Y@N-term          | 0.00057017  | 938.499878 | 470.2572 | 938.499329 | 470.256928 | 2 | 9  | 15.0367 | 34.38 |
| 1 | 72.6 | 72.6 | 57.2 ZAP70_FlexIII | 99.0 EACPNSSASNASGAAAPTLPHPSTLTHPQR | Propionamide(C)@3; Deamidated(N)@10; Label:13C(6)15N(4)(R)@31                               |                             | 0.0290017   | 3122.50098 | 1041.841 | 3122.47144 | 1041.83106 | 3 | 12 | 12.8812 | 34.38 |
| 1 | 72.6 | 72.6 | 57.2 ZAP70_FlexIII | 99.0 RDNLIIADIELGCGNFGSVR           | Label:13C(6)15N(4)(R)@1; Propionamide(C)@13; Deamidated(N)@15; Label:13C(6)15N(4)(R)@20     | missed R-D@1                | 0.0274552   | 2253.1604  | 752.0607 | 2253.13257 | 752.051514 | 3 | 11 | 17.6685 | 34.38 |
| 1 | 72.6 | 72.6 | 57.2 ZAP70_FlexIII | 99.0 ALGADDSYYTAR                   | Label:13C(6)15N(4)(R)@12                                                                    |                             | -0.0008059  | 1311.59631 | 656.8054 | 1311.59705 | 656.805786 | 2 | 13 | 13.2865 | 34.38 |
| 1 | 72.6 | 72.6 | 57.2 ZAP70_FlexIII | 99.0 ALGADDSYYTAR                   |                                                                                             |                             | -0.00218611 | 1301.58667 | 651.8006 | 1301.58875 | 651.801697 | 2 | 12 | 13.0865 | 34.38 |
| 1 | 72.6 | 72.6 | 57.2 ZAP70_FlexIII | 99.0 AYPFTLYK                       | Label:13C(6)15N(2)(K)@8                                                                     | cleaved C-A@N-term          | 0.00039559  | 1009.53687 | 505.7757 | 1009.53644 | 505.775482 | 2 | 10 | 14.6894 | 34.38 |
| 1 | 72.6 | 72.6 | 57.2 ZAP70_FlexIII | 99.0 AYPFTLYK                       | Label:13C(6)15N(2)(K)@8                                                                     | cleaved C-A@N-term          | 0.00021248  | 1009.53668 | 505.7756 | 1009.53644 | 505.775482 | 2 | 10 | 14.9532 | 34.38 |
| 1 | 72.6 | 72.6 | 57.2 ZAP70_FlexIII | 99.0 DNLLIADIELGCGNFGSVR            | Deamidated(N)@2; Propionamide(C)@12; Label:13C(6)15N(4)(R)@19                               |                             | 0.0238525   | 2087.04736 | 1044.531 | 2087.02319 | 1044.51892 | 2 | 15 | 17.2947 | 34.38 |
| 1 | 72.6 | 72.6 | 57.2 ZAP70_FlexIII | 99.0 DNLLIADIELGCGNFGSVR            | Deamidated(N)@2; Propionamide(C)@12; Label:13C(6)15N(4)(R)@19                               |                             | 0.0267579   | 2087.05005 | 696.6906 | 2087.02319 | 696.681702 | 3 | 15 | 17.4271 | 34.38 |
| 1 | 72.6 | 72.6 | 57.2 ZAP70_FlexIII | 99.0 DNLLIADIELGCGNFGSVR            | Deamidated(N)@2; Propionamide(C)@12; Label:13C(6)15N(4)(R)@19                               |                             | 0.020955    | 2087.04346 | 1044.529 | 2087.02319 | 1044.51892 | 2 | 13 | 17.332  | 34.38 |
| 1 | 72.6 | 72.6 | 57.2 ZAP70_FlexIII | 99.0 DNLLIADIELGCGNFGSVR            | Deamidated(N)@2; Propionamide(C)@12; Label:13C(6)15N(4)(R)@19                               |                             | 0.0238525   | 2087.04736 | 1044.531 | 2087.02319 | 1044.51892 | 2 | 10 | 18.5084 | 34.38 |
| 1 | 72.6 | 72.6 | 57.2 ZAP70_FlexIII | 99.0 EACPNSSASNASGAAAPTLPHPSTLTHPQR | Propionamide(C)@3; Label:13C(6)15N(4)(R)@31                                                 |                             | -8.16E-06   | 3121.48779 | 781.3792 | 3121.48755 | 781.37915  | 4 | 11 | 12.8309 | 34.38 |
| 1 | 72.6 | 72.6 | 57.2 ZAP70_FlexIII | 99.0 EAQIMHQLDNPYIVR                | Label:13C(6)15N(4)(R)@15                                                                    |                             | 0.00309741  | 1835.92566 | 612.9825 | 1835.92273 | 612.981506 | 3 | 17 | 14.7274 | 34.38 |
| 1 | 72.6 | 72.6 | 57.2 ZAP70_FlexIII | 99.0 EAQIMHQLDNPYIVR                | Label:13C(6)15N(4)(R)@15                                                                    |                             | 0.00409832  | 1835.92688 | 918.9707 | 1835.92273 | 918.968689 | 2 | 18 | 14.7542 | 34.38 |
| 1 | 72.6 | 72.6 | 57.2 ZAP70_FlexIII | 99.0 EAQIMHQLDNPYIVR                | Label:13C(6)15N(4)(R)@15                                                                    |                             | 0.00071704  | 1835.92358 | 612.9818 | 1835.92273 | 612.981506 | 3 | 16 | 14.9945 | 34.38 |
| 1 | 72.6 | 72.6 | 57.2 ZAP70_FlexIII | 99.0 EAQIMHQLDNPYIVR                | Label:13C(6)15N(4)(R)@15                                                                    |                             | -0.00102863 | 1835.92163 | 918.9681 | 1835.92273 | 918.968689 | 2 | 20 | 15.2939 | 34.38 |
| 1 | 72.6 | 72.6 | 57.2 ZAP70_FlexIII | 99.0 EAQIMHQLDNPYIVR                | Label:13C(6)15N(4)(R)@15                                                                    |                             | -0.00294507 | 1835.9198  | 612.9805 | 1835.92273 | 612.981506 | 3 | 17 | 15.5574 | 34.38 |
| 1 | 72.6 | 72.6 | 57.2 ZAP70_FlexIII | 99.0 EAQIMHQLDNPYIVR                | Label:13C(6)15N(4)(R)@15                                                                    |                             | -0.00111402 | 1835.92139 | 612.9811 | 1835.92273 | 612.981506 | 3 | 17 | 15.8241 | 34.38 |
| 1 | 72.6 | 72.6 | 57.2 ZAP70_FlexIII | 99.0 EAQIMHQLDNPYIVR                | Label:13C(6)15N(4)(R)@15                                                                    |                             | -5.21E-05   | 1835.92273 | 918.9686 | 1835.92273 | 918.968689 | 2 | 21 | 15.8264 | 34.38 |
| 1 | 72.6 | 72.6 | 57.2 ZAP70_FlexIII | 99.0 EAQIMHQLDNPYIVR                | Label:13C(6)15N(4)(R)@15                                                                    |                             | -0.00129712 | 1835.92139 | 612.9811 | 1835.92273 | 612.981506 | 3 | 16 | 16.0848 | 34.38 |
| 1 | 72.6 | 72.6 | 57.2 ZAP70_FlexIII | 99.0 EAQIMHQLDNPYIVR                | Label:13C(6)15N(4)(R)@15                                                                    |                             | 0.00163257  | 1835.92456 | 612.9821 | 1835.92273 | 612.981506 | 3 | 16 | 16.3431 | 34.38 |
| 1 | 72.6 | 72.6 | 57.2 ZAP70_FlexIII | 99.0 EAQIMHQLDNPYIVR                | Label:13C(6)15N(4)(R)@15                                                                    |                             | 0.00409832  | 1835.92688 | 918.9707 | 1835.92273 | 918.968689 | 2 | 22 | 16.3701 | 34.38 |
| 1 | 72.6 | 72.6 | 57.2 ZAP70_FlexIII | 99.0 EAQIMHQLDNPYIVR                | Label:13C(6)15N(4)(R)@15                                                                    |                             | -0.0005647  | 1835.92212 | 612.9813 | 1835.92273 | 612.981506 | 3 | 14 | 15.268  | 34.38 |
| 1 | 72.6 | 72.6 | 57.2 ZAP70_FlexIII | 99.0 EAQIMHQLDNPYIVR                | Deamidated(N)@10; Label:13C(6)15N(4)(R)@15                                                  |                             | 0.0200833   | 1836.92688 | 919.4707 | 1836.90674 | 919.460693 | 2 | 12 | 16.0871 | 34.38 |
| 1 | 72.6 | 72.6 | 57.2 ZAP70_FlexIII | 99.0 EAQIMHQLDNPYIVR                | Deamidated(Q)@7; Label:13C(6)15N(4)(R)@15                                                   |                             | 0.0331205   | 1836.94006 | 613.3206 | 1836.90674 | 613.309509 | 3 | 11 | 16.6133 | 34.38 |
| 1 | 72.6 | 72.6 | 57.2 ZAP70_FlexIII | 99.0 EAQIMHQLDNPYIVR                | Deamidated(Q)@7; Label:13C(6)15N(4)(R)@15                                                   |                             | 0.00309117  | 1836.90967 | 613.3105 | 1836.90674 | 613.309509 | 3 | 11 | 15.5207 | 34.38 |
| 1 | 72.6 | 72.6 | 57.2 ZAP70_FlexIII | 99.0 EAQIMHQLDNPYIVR                | Deamidated(Q)@7; Label:13C(6)15N(4)(R)@15                                                   |                             | 0.0200833   | 1836.92688 | 919.4707 | 1836.90674 | 919.460693 | 2 | 11 | 16.6415 | 34.38 |
| 1 | 72.6 | 72.6 | 57.2 ZAP70_FlexIII | 99.0 FLRRPR                         | Label:13C(6)15N(4)(R)@4; Label:13C(6)15N(4)(R)@6                                            |                             | -0.00089115 | 820.5177   | 411.2661 | 820.518616 | 411.266602 | 2 | 8  | 13.3363 | 34.38 |
| 1 | 72.6 | 72.6 | 57.2 ZAP70_FlexIII | 99.0 GPEVMAFIEQGKR                  | Label:13C(6)15N(2)(K)@12; Label:13C(6)15N(4)(R)@13                                          | missed K-R@12               | -0.00068197 | 1478.76636 | 493.9294 | 1478.76709 | 493.929627 | 3 | 11 | 16.0716 | 34.38 |
| 1 | 72.6 | 72.6 | 57.2 ZAP70_FlexIII | 99.0 KEQGTALSLYIK                   | Label:13C(6)15N(2)(K)@1; Label:13C(6)15N(2)(K)@14                                           | missed K-E@1                | -0.00186117 | 1585.86682 | 793.9407 | 1585.86865 | 793.941589 | 2 | 18 | 15.2026 | 34.38 |
| 1 | 72.6 | 72.6 | 57.2 ZAP70_FlexIII | 99.0 KEQGTALSLYIK                   | Label:13C(6)15N(2)(K)@1; Label:13C(6)15N(2)(K)@14                                           | missed K-E@1                | 0.00110521  | 1585.87    | 529.6306 | 1585.86865 | 529.630188 | 3 | 15 | 16.1856 | 34.38 |
| 1 | 72.6 | 72.6 | 57.2 ZAP70_FlexIII | 99.0 KEQGTALSLYIK                   | Label:13C(6)15N(2)(K)@1; Label:13C(6)15N(2)(K)@14                                           | missed K-E@1                | 0.00289958  | 1585.8717  | 793.9431 | 1585.86865 | 793.941589 | 2 | 23 | 16.3451 | 34.38 |
| 1 | 72.6 | 72.6 | 57.2 ZAP70_FlexIII | 99.0 KEQGTALSLYIK                   | Label:13C(6)15N(2)(K)@1; Label:13C(6)15N(2)(K)@14                                           | missed K-E@1                | 0.00110521  | 1585.87    | 529.6306 | 1585.86865 | 529.630188 | 3 | 18 | 16.4445 | 34.38 |
| 1 | 72.6 | 72.6 | 57.2 ZAP70_FlexIII | 99.0 KEQGTALSLYIK                   | Label:13C(6)15N(2)(K)@1; Label:13C(6)15N(2)(K)@14                                           | missed K-E@1                | -0.00186117 | 1585.86682 | 793.9407 | 1585.86865 | 793.941589 | 2 | 21 | 16.6115 | 34.38 |
| 1 | 72.6 | 72.6 | 57.2 ZAP70_FlexIII | 99.0 KEQGTALSLYIK                   | Label:13C(6)15N(2)(K)@1; Label:13C(6)15N(2)(K)@14                                           | missed K-E@1                | -0.00035963 | 1585.86853 | 529.6301 | 1585.86865 | 529.630188 | 3 | 17 | 16.7007 | 34.38 |
| 1 | 72.6 | 72.6 | 57.2 ZAP70_FlexIII | 99.0 KEQGTALSLYIK                   | Label:13C(6)15N(2)(K)@1; Label:13C(6)15N(2)(K)@14                                           | missed K-E@1                | 0.00110521  | 1585.87    | 529.6306 | 1585.86865 | 529.630188 | 3 | 16 | 16.9806 | 34.38 |
| 1 | 72.6 | 72.6 | 57.2 ZAP70_FlexIII | 99.0 KEQGTALSLYIK                   | Label:13C(6)15N(2)(K)@1; Deamidated(Q)@3; Label:13C(6)15N(2)(K)@14                          | missed K-E@1                | 0.0141238   | 1586.86682 | 794.4407 | 1586.85266 | 794.433594 | 2 | 11 | 16.0603 | 34.38 |
| 1 | 72.6 | 72.6 | 57.2 ZAP70_FlexIII | 99.0 KLYSGAQTGDK                    | Label:13C(6)15N(2)(K)@1; Label:13C(6)15N(2)(K)@11                                           | missed K-L@1                | 0.00161416  | 1182.62305 | 592.3188 | 1182.62158 | 592.318054 | 2 | 18 | 10.5008 | 34.38 |
| 1 | 72.6 | 72.6 | 57.2 ZAP70_FlexIII | 99.0 KLYSGAQTGDK                    | Label:13C(6)15N(2)(K)@1; Label:13C(6)15N(2)(K)@11                                           | missed K-L@1                | -0.0120516  | 1182.60938 | 395.2104 | 1182.62158 | 395.214447 | 3 | 11 | 10.3603 | 34.38 |
| 1 | 72.6 | 72.6 | 57.2 ZAP70_FlexIII | 99.0 KLYSGAQTGDK                    | Label:13C(6)15N(2)(K)@1; Label:13C(6)15N(2)(K)@11                                           | missed K-L@1                | 0.00113205  | 1182.62256 | 395.2148 | 1182.62158 | 395.214447 | 3 | 11 | 10.6346 | 34.38 |
| 1 | 72.6 | 72.6 | 57.2 ZAP70_FlexIII | 99.0 KQIDVAIK                       | Label:13C(6)15N(2)(K)@1; Label:13C(6)15N(2)(K)@8                                            | missed K-Q@2                | -0.00052659 | 929.587585 | 310.8698 | 929.588074 | 310.869965 | 3 | 9  | 12.7285 | 34.38 |
| 1 | 72.6 | 72.6 | 57.2 ZAP70_FlexIII | 99.0 MKGPEVMAFIEQGK                 | Label:13C(6)15N(2)(K)@2; Label:13C(6)15N(2)(K)@14                                           | missed K-G@2                | 0.00238117  | 1579.80957 | 527.6105 | 1579.80737 | 527.609741 | 3 | 15 | 16.7837 | 34.38 |
| 1 | 72.6 | 72.6 | 57.2 ZAP70_FlexIII | 99.0 MKGPEVMAFIEQGK                 | Label:13C(6)15N(2)(K)@2; Label:13C(6)15N(2)(K)@14                                           | missed K-G@2                | -0.00036542 | 1579.80701 | 527.6096 | 1579.80737 | 527.609741 | 3 | 15 | 17.0569 | 34.38 |
| 1 | 72.6 | 72.6 | 57.2 ZAP70_FlexIII | 99.0 MKGPEVMAFIEQGK                 | Label:13C(6)15N(2)(K)@2; Label:13C(6)15N(2)(K)@14                                           | missed K-G@2                | 7.96E-07    | 1579.80725 | 527.6097 | 1579.80737 | 527.609741 | 3 | 15 | 17.3169 | 34.38 |
| 1 | 72.6 | 72.6 | 57.2 ZAP70_FlexIII | 99.0 MKGPEVMAFIEQGK                 | Label:13C(6)15N(2)(K)@2; Label:13C(6)15N(2)(K)@14                                           | missed K-G@2                | 0.00238117  | 1579.80957 | 527.6105 | 1579.80737 | 527.609741 | 3 | 13 | 17.5843 | 34.38 |
| 1 | 72.6 | 72.6 | 57.2 ZAP70_FlexIII | 99.0 MKGPEVMAFIEQGKR                | Oxidation(M)@1; Label:13C(6)15N(2)(K)@2; Label:13C(6)15N(2)(K)@14; Label:13C(6)15N(4)(R)@15 | missed K-G@2; missed K-R@14 | -0.00177603 | 1761.90967 | 588.3105 | 1761.91162 | 588.311157 | 3 | 15 | 17.1322 | 34.38 |
| 1 | 72.6 | 72   |                    |                                     |                                                                                             |                             |             |            |          |            |            |   |    |         |       |

|   |       |       |                     |                                                         |                                                                                                 |                             |             |            |          |            |            |   |    |         |       |
|---|-------|-------|---------------------|---------------------------------------------------------|-------------------------------------------------------------------------------------------------|-----------------------------|-------------|------------|----------|------------|------------|---|----|---------|-------|
| 1 | 72.6  | 72.6  | 57.2 ZAP70_FlexIII  | 99.0 QGTEKADTEEMMR                                      | Label:13C(6)15N(2)(K)@5; Label:13C(6)15N(4)(R)@13                                               | missed K-A@5                | 0.0008626   | 1542.67822 | 772.3464 | 1542.67737 | 772.345947 | 2 | 16 | 11.7805 | 34.38 |
| 1 | 72.6  | 72.6  | 57.2 ZAP70_FlexIII  | 99.0 QGTEKADTEEMMR                                      | Gln->pyro-Glu@N-term; Label:13C(6)15N(2)(K)@5; Label:13C(6)15N(4)(R)@13                         | missed K-A@5                | -0.00079595 | 1525.65002 | 763.8323 | 1525.65076 | 763.832642 | 2 | 20 | 12.9379 | 34.38 |
| 1 | 72.6  | 72.6  | 57.2 ZAP70_FlexIII  | 99.0 RIDTLNSDGYTPPEAR                                   | Label:13C(6)15N(4)(R)@1; Label:13C(6)15N(4)(R)@16                                               | missed R-I@1                | -0.00060575 | 1823.89087 | 608.9709 | 1823.89172 | 608.971191 | 3 | 18 | 12.8966 | 34.38 |
| 1 | 72.6  | 72.6  | 57.2 ZAP70_FlexIII  | 99.0 RIDTLNSDGYTPPEAR                                   | Label:13C(6)15N(4)(R)@1; Deamidated(N)@6; Label:13C(6)15N(4)(R)@16                              | missed R-I@1                | -0.00414875 | 1824.87964 | 609.3005 | 1824.87573 | 609.299194 | 3 | 18 | 13.1701 | 34.38 |
| 1 | 72.6  | 72.6  | 57.2 ZAP70_FlexIII  | 99.0 RIDTLNSDGYTPPEAR                                   | Label:13C(6)15N(4)(R)@1; Deamidated(N)@6; Label:13C(6)15N(4)(R)@16                              | missed R-I@1                | 0.0112532   | 1824.88684 | 913.4507 | 1824.87573 | 913.445129 | 2 | 17 | 13.1972 | 34.38 |
| 1 | 72.6  | 72.6  | 57.2 ZAP70_FlexIII  | 99.0 RIDTLNSDGYTPPEAR                                   | Label:13C(6)15N(4)(R)@1; Label:13C(6)15N(4)(R)@16                                               | missed R-I@1                | -0.00188749 | 1823.88977 | 608.9705 | 1823.89172 | 608.971191 | 3 | 12 | 12.6336 | 34.38 |
| 1 | 72.6  | 72.6  | 57.2 ZAP70_FlexIII  | 99.0 TVYHYLISODK                                        | Label:13C(6)15N(2)(K)@11                                                                        |                             | 0.00257568  | 1373.7096  | 458.9105 | 1373.70703 | 458.909638 | 3 | 12 | 13.8287 | 34.38 |
| 1 | 72.6  | 72.6  | 57.2 ZAP70_FlexIII  | 99.0 TVYHYLISODK                                        | Label:13C(6)15N(2)(K)@11                                                                        |                             | 0.00257568  | 1373.7096  | 458.9105 | 1373.70703 | 458.909638 | 3 | 11 | 14.091  | 34.38 |
| 1 | 72.6  | 72.6  | 57.2 ZAP70_FlexIII  | 99.0 TVYHYLISODK                                        | Label:13C(6)15N(2)(K)@11                                                                        |                             | -0.0019104  | 1373.7052  | 458.909  | 1373.70703 | 458.909638 | 3 | 10 | 14.356  | 34.38 |
| 1 | 72.6  | 72.6  | 57.2 ZAP70_FlexIII  | 99.0 TVYHYLISODK                                        | Label:13C(6)15N(2)(K)@11                                                                        |                             | -0.0042121  | 1373.70667 | 687.8606 | 1373.70703 | 687.860779 | 2 | 10 | 14.4422 | 34.38 |
| 1 | 72.6  | 72.6  | 57.2 ZAP70_FlexIII  | 99.0 WEDRPDLTVQEQ                                       | Label:13C(6)15N(4)(R)@4; Label:13C(6)15N(4)(R)@13                                               |                             | 0.00223075  | 1709.83008 | 570.9506 | 1709.82764 | 570.949829 | 3 | 15 | 15.7988 | 34.38 |
| 1 | 72.6  | 72.6  | 57.2 ZAP70_FlexIII  | 99.0 WEDRPDLTVQEQ                                       | Label:13C(6)15N(4)(R)@4; Label:13C(6)15N(4)(R)@13                                               |                             | 0.00223075  | 1709.83008 | 570.9506 | 1709.82764 | 570.949829 | 3 | 15 | 16.3167 | 34.38 |
| 1 | 72.6  | 72.6  | 57.2 ZAP70_FlexIII  | 99.0 WEDRPDLTVQEQ                                       | Label:13C(6)15N(4)(R)@4; Label:13C(6)15N(4)(R)@13                                               |                             | 0.00223075  | 1709.83008 | 570.9506 | 1709.82764 | 570.949829 | 3 | 15 | 16.5718 | 34.38 |
| 1 | 72.6  | 72.6  | 57.2 ZAP70_FlexIII  | 99.0 WEDRPDLTVQEQ                                       | Label:13C(6)15N(4)(R)@4; Label:13C(6)15N(4)(R)@13                                               |                             | 0.00223075  | 1709.83008 | 570.9506 | 1709.82764 | 570.949829 | 3 | 14 | 15.2417 | 34.38 |
| 1 | 72.6  | 72.6  | 57.2 ZAP70_FlexIII  | 99.0 WEDRPDLTVQEQ                                       | Label:13C(6)15N(4)(R)@4; Label:13C(6)15N(4)(R)@13                                               |                             | -0.00198067 | 1709.82581 | 570.9492 | 1709.82764 | 570.949829 | 3 | 14 | 16.058  | 34.38 |
| 1 | 72.6  | 72.6  | 57.2 ZAP70_FlexIII  | 99.0 WEDRPDLTVQEQ                                       | Label:13C(6)15N(4)(R)@4; Label:13C(6)15N(4)(R)@13                                               |                             | -0.00079666 | 1709.8269  | 855.9207 | 1709.82764 | 855.921082 | 2 | 14 | 16.683  | 34.38 |
| 1 | 72.6  | 72.6  | 57.2 ZAP70_FlexIII  | 99.0 WEDRPDLTVQEQ                                       | Label:13C(6)15N(4)(R)@4; Label:13C(6)15N(4)(R)@13                                               |                             | 0.00223075  | 1709.83008 | 570.9506 | 1709.82764 | 570.949829 | 3 | 13 | 14.7215 | 34.38 |
| 1 | 72.6  | 72.6  | 57.2 ZAP70_FlexIII  | 99.0 WEDRPDLTVQEQ                                       | Label:13C(6)15N(4)(R)@4; Label:13C(6)15N(4)(R)@13                                               |                             | 0.00094901  | 1709.82837 | 570.9501 | 1709.82764 | 570.949829 | 3 | 13 | 16.8315 | 34.38 |
| 1 | 72.6  | 72.6  | 57.2 ZAP70_FlexIII  | 99.0 WEDRPDLTVQEQ                                       | Label:13C(6)15N(4)(R)@4; Label:13C(6)15N(4)(R)@13                                               |                             | 0.00223075  | 1709.83008 | 570.9506 | 1709.82764 | 570.949829 | 3 | 12 | 14.9795 | 34.38 |
| 1 | 72.6  | 72.6  | 57.2 ZAP70_FlexIII  | 99.0 WEDRPDLTVQEQ                                       | Label:13C(6)15N(4)(R)@4; Label:13C(6)15N(4)(R)@13                                               |                             | -0.00527658 | 1709.82251 | 570.9481 | 1709.82764 | 570.949829 | 3 | 11 | 17.1235 | 34.38 |
| 1 | 72.6  | 72.6  | 57.2 ZAP70_FlexIII  | 99.0 WYAPECINFR                                         | Propionamide(C)@6; Label:13C(6)15N(4)(R)@10                                                     |                             | -0.00128102 | 1378.6355  | 690.325  | 1378.63672 | 690.325684 | 2 | 11 | 15.7197 | 34.38 |
| 1 | 72.6  | 72.6  | 57.2 ZAP70_FlexIII  | 99.0 WYAPECINFR                                         | Propionamide(C)@6; Label:13C(6)15N(4)(R)@10                                                     |                             | -0.00189138 | 1378.63489 | 690.3247 | 1378.63672 | 690.325684 | 2 | 10 | 15.9786 | 34.38 |
| 1 | 72.6  | 72.6  | 57.2 ZAP70_FlexIII  | 99.0 WYAPECINFR                                         | Propionamide(C)@6; Label:13C(6)15N(4)(R)@10                                                     |                             | -0.00067067 | 1378.63611 | 690.3253 | 1378.63672 | 690.325684 | 2 | 10 | 16.2358 | 34.38 |
| 1 | 72.6  | 72.6  | 57.2 ZAP70_FlexIII  | 99.0 YPTFLYK                                            | Label:13C(6)15N(2)(K)@7                                                                         | cleaved A-Y@N-term          | 0.00819955  | 938.507446 | 470.261  | 938.499329 | 470.256928 | 2 | 9  | 14.7754 | 34.38 |
| 1 | 72.6  | 72.6  | 57.2 ZAP70_FlexIII  | 99.0 YPTFLYK                                            | Label:13C(6)15N(2)(K)@7                                                                         | cleaved A-Y@N-term          | 0.00073716  | 938.500061 | 470.2573 | 938.499329 | 470.256928 | 2 | 9  | 15.0782 | 34.38 |
| 1 | 72.6  | 72.6  | 57.2 ZAP70_FlexIII  | 99.0 YPTFLYK                                            | Label:13C(6)15N(2)(K)@7                                                                         | cleaved A-Y@N-term          | 0.00092027  | 938.500244 | 470.2574 | 938.499329 | 470.256928 | 2 | 9  | 14.8156 | 34.38 |
| 3 | 59.71 | 61.81 | 49.8 VANGL1_FlexIII | 99.0 AALVLENYYYK                                        | Label:13C(6)15N(2)(K)@11                                                                        |                             | -0.00620385 | 1289.70483 | 645.8597 | 1289.71106 | 645.862793 | 2 | 13 | 15.4946 | 19.55 |
| 3 | 59.71 | 61.81 | 49.8 VANGL1_FlexIII | 99.0 AALVLENYYYKFTIYNPNLLTASK                           | Label:13C(6)15N(2)(K)@1; Label:13C(6)15N(2)(K)@25                                               | missed K-D@11               | 0.0032419   | 2875.5376  | 959.5198 | 2875.53418 | 959.518677 | 3 | 20 | 17.8205 | 19.55 |
| 3 | 59.71 | 61.81 | 49.8 VANGL1_FlexIII | 99.0 AMIAAAR                                            | Label:13C(6)15N(4)(R)@8                                                                         |                             | -0.00096672 | 783.429077 | 392.7218 | 783.430064 | 392.722321 | 2 | 9  | 12.0704 | 19.55 |
| 3 | 59.71 | 61.81 | 49.8 VANGL1_FlexIII | 99.0 APGEVMDPR                                          | Label:13C(6)15N(4)(R)@9                                                                         |                             | -0.00096711 | 980.461487 | 491.238  | 980.462463 | 491.238525 | 2 | 13 | 12.1557 | 19.55 |
| 3 | 59.71 | 61.81 | 49.8 VANGL1_FlexIII | 99.0 DFTIYNPNLLTASK                                     | Label:13C(6)15N(2)(K)@14                                                                        |                             | 0.011196    | 1603.84485 | 802.9297 | 1603.83374 | 802.924133 | 2 | 15 | 15.921  | 19.55 |
| 3 | 59.71 | 61.81 | 49.8 VANGL1_FlexIII | 99.0 DGVIFVLK                                           | Label:13C(6)15N(2)(K)@8                                                                         |                             | 0.0033831   | 897.544861 | 449.7797 | 897.541504 | 449.778015 | 2 | 11 | 15.926  | 19.55 |
| 3 | 59.71 | 61.81 | 49.8 VANGL1_FlexIII | 99.0 DMEDSVGLDCK                                        | Propionamide(C)@10; Label:13C(6)15N(2)(K)@11                                                    |                             | -0.0109496  | 1289.52502 | 645.7698 | 1289.53589 | 645.775208 | 2 | 14 | 13.4853 | 19.55 |
| 3 | 59.71 | 61.81 | 49.8 VANGL1_FlexIII | 99.0 DMEDSVGLDCKR                                       | Propionamide(C)@10; Label:13C(6)15N(2)(K)@11; Label:13C(6)15N(4)(R)@12                          | missed K-R@11               | -0.00032407 | 1455.64502 | 728.8298 | 1455.64526 | 728.828995 | 2 | 14 | 12.8279 | 19.55 |
| 3 | 59.71 | 61.81 | 49.8 VANGL1_FlexIII | 99.0 DSSHNELYEEAEHER                                    | Label:13C(6)15N(4)(R)@16                                                                        |                             | -0.0150333  | 2016.81751 | 673.2798 | 2016.83252 | 673.28479  | 3 | 18 | 12.6738 | 19.55 |
| 3 | 59.71 | 61.81 | 49.8 VANGL1_FlexIII | 99.0 EAAQAIFFSMAR                                       | Label:13C(6)15N(4)(R)@12                                                                        |                             | -0.00103441 | 1300.64624 | 651.3304 | 1300.64734 | 651.330933 | 2 | 13 | 15.0534 | 19.55 |
| 3 | 59.71 | 61.81 | 49.8 VANGL1_FlexIII | 99.0 FYSLGHSIQIR                                        | Label:13C(6)15N(4)(R)@11                                                                        |                             | -0.00053779 | 1329.70642 | 665.8605 | 1329.70691 | 665.860718 | 2 | 15 | 14.5354 | 19.55 |
| 3 | 59.71 | 61.81 | 49.8 VANGL1_FlexIII | 99.0 HMAGLK                                             | Label:13C(6)15N(2)(K)@6                                                                         |                             | -0.00109711 | 663.360657 | 332.6876 | 663.361755 | 332.688171 | 2 | 8  | 9.3389  | 19.55 |
| 3 | 59.71 | 61.81 | 49.8 VANGL1_FlexIII | 99.0 IPIFLSEEDPK                                        | Label:13C(6)15N(2)(K)@14                                                                        |                             | -0.00180373 | 1667.92493 | 834.9697 | 1667.92651 | 834.970561 | 2 | 19 | 17.8557 | 19.55 |
| 3 | 59.71 | 61.81 | 49.8 VANGL1_FlexIII | 99.0 ISKDMEDSVGLDCK                                     | Label:13C(6)15N(2)(K)@3; Propionamide(C)@13; Label:13C(6)15N(2)(K)@14                           | missed K-D@3                | 0.0061723   | 1625.76721 | 542.9297 | 1625.76111 | 542.927673 | 3 | 16 | 12.969  | 19.55 |
| 3 | 59.71 | 61.81 | 49.8 VANGL1_FlexIII | 99.0 ISKDMEDSVGLDCKR                                    | Label:13C(6)15N(2)(K)@3; Propionamide(C)@13; Label:13C(6)15N(2)(K)@14; Label:13C(6)15N(4)(R)@15 | missed K-D@3; missed K-R@14 | -0.00218409 | 1791.86885 | 598.2968 | 1791.87048 | 598.297485 | 3 | 19 | 12.5092 | 19.55 |
| 3 | 59.71 | 61.81 | 49.8 VANGL1_FlexIII | 99.0 KIPFILSEEDPK                                       | Label:13C(6)15N(2)(K)@1; Label:13C(6)15N(2)(K)@15                                               | missed K-I@1                | -1.06E-05   | 1804.03565 | 602.3525 | 1804.03577 | 602.352539 | 3 | 19 | 17.6924 | 19.55 |
| 3 | 59.71 | 61.81 | 49.8 VANGL1_FlexIII | 99.0 LQAEQQAPGEVMDPR                                    | Label:13C(6)15N(2)(K)@6; Label:13C(6)15N(4)(R)@17                                               | missed K-A@8                | -0.00084788 | 1942.95313 | 648.6583 | 1942.95374 | 648.658508 | 3 | 17 | 12.4192 | 19.55 |
| 3 | 59.71 | 61.81 | 49.8 VANGL1_FlexIII | 99.0 LQSETSVYPTFLYK                                     | Label:13C(6)15N(2)(K)@14                                                                        |                             | -0.00450602 | 1682.86023 | 842.4374 | 1682.86475 | 842.439636 | 2 | 17 | 15.5471 | 19.55 |
| 3 | 59.71 | 61.81 | 49.8 VANGL1_FlexIII | 99.0 LVSDEAVTNGLR                                       | Label:13C(6)15N(4)(R)@12                                                                        |                             | -0.010682   | 1282.66504 | 642.3398 | 1282.67566 | 642.345093 | 2 | 14 | 13.5734 | 19.55 |
| 3 | 59.71 | 61.81 | 49.8 VANGL1_FlexIII | 99.0 LVSDEAVTNGLRDGIIVFLK                               | Label:13C(6)15N(4)(R)@12; Label:13C(6)15N(2)(K)@20                                              | missed R-D@12               | -0.00164866 | 2162.20532 | 1082.11  | 2162.20654 | 1082.1106  | 2 | 24 | 16.8009 | 19.55 |
| 3 | 59.71 | 61.81 | 49.8 VANGL1_FlexIII | 99.0 LVVAVEAFIHQR                                       | Label:13C(6)15N(4)(R)@14                                                                        |                             | -0.00233608 | 1632.92053 | 817.4675 | 1632.92273 | 817.468628 | 2 | 20 | 16.3547 | 19.55 |
| 3 | 59.71 | 61.81 | 49.8 VANGL1_FlexIII | 99.0 QLQPMFTLQVVR                                       | Gln->pyro-Glu@N-term; Label:13C(6)15N(4)(R)@12                                                  |                             | 0.00154733  | 1451.78503 | 726.8998 | 1451.78545 | 726.899897 | 2 | 13 | 17.58   | 19.55 |
| 3 | 59.71 | 61.81 | 49.8 VANGL1_FlexIII | 99.0 SVTIQPTTGEPLLGNDSTR                                | Label:13C(6)15N(4)(R)@19                                                                        |                             | -0.00259738 | 1991.01733 | 996.5159 | 1991.0199  | 996.517212 | 2 | 22 | 15.0034 | 19.55 |
| 3 | 59.71 | 61.81 | 49.8 VANGL1_FlexIII | 99.0 SVTIQPTTGEPLLGNDSTRTEEVDQNDNWGETTTAIGTSEHSISQEDIAR | Label:13C(6)15N(4)(R)@19; Deamidated(N)@27; Label:13C(6)15N(4)(R)@50                            | missed R-T@19               | 0.0369549   | 5403.56348 | 1081.72  | 5403.52539 | 1081.71228 | 5 | 15 | 15.3857 | 19.55 |
| 3 | 59.71 | 61.81 | 49.8 VANGL1_FlexIII | 99.0 TEEVDQNDNWGETTTAIGTSEHSISQEDIAR                    | Deamidated(N)@8; Label:13C(6)15N(4)(R)@31                                                       |                             | 0.0139588   | 3430.53003 | 858.6398 | 3430.51587 | 858.636292 | 4 | 17 | 14.606  | 19.55 |
| 3 | 59.71 | 61.81 | 49.8 VANGL1_FlexIII | 99.0 TSVYPTFLYK                                         | Label:13C(6)15N(2)(K)@10                                                                        | cleaved E-T@N-term          | 0.00123614  | 1225.64868 | 613.8316 | 1225.64746 | 613.830994 | 2 | 8  | 26.1589 | 19.55 |
| 3 | 59.71 | 61.81 | 49.8 VANGL1_FlexIII | 99.0 VYNVDPGSNNATGQSR                                   | Label:13C(6)15N(4)(R)@16                                                                        |                             | -0.00482179 | 1687.77405 | 844.8943 | 1687.77893 | 844.896729 | 2 | 21 | 11.963  | 19.55 |
| 3 | 59.71 | 61.81 | 49.8 VANGL1_FlexIII | 99.0 YLSAGPTLOYDKOR                                     | Label:13C(6)15N(2)(K)@12; Label:13C(6)15N(4)(R)@14                                              | missed K-D@12               | -0.00372316 | 1643.82373 | 822.9191 | 1643.82739 | 822.92096  | 2 | 14 | 13.2742 | 19.55 |
| 3 | 59.71 | 61.81 | 49.8 VANGL1_FlexIII | 99.0 RDSSHNELYEEAEHER                                   | Label:13C(6)15N(4)(R)@1; Deamidated(N)@6; Label:13C(6)15N(4)(R)@17                              | missed R-D@1                | 0.00387106  | 2183.92969 | 546.9897 | 2183.92578 | 546.98877  | 4 | 12 | 12.2431 | 19.55 |
| 3 | 59.71 | 61.81 | 49.8 VANGL1_FlexIII | 99.0 AALVLENYYYK                                        | Label:13C(6)15N(2)(K)@11                                                                        |                             | 2.17E-05    | 1289.7113  | 645.8629 | 1289.71106 | 645.862793 | 2 | 13 | 15.7717 | 19.55 |
| 3 | 59.71 | 61.81 | 49.8 VANGL1_FlexIII | 99.0 AALVLENYYYKFTIYNPNLLTASK                           | Label:13C(6)15N(2)(K)@11; Deamidated(N)@17; Label:13C(6)15N(2)(K)@25                            | missed K-D@11               | 0.00909455  | 2876.5271  | 959.8497 | 2876.51831 | 959.84668  | 3 | 19 | 17.272  | 19.55 |
| 3 | 59.71 | 61.81 | 49.8 VANGL1_FlexIII | 99.0 AALVLENYYYKFTIYNPNLLTASK                           | Label:13C(6)15N(2)(K)@11; Label:13C(6)15N(2)(K)@25                                              | missed K-D@11               | 0.0108255   | 2875.54541 | 1438.78  | 2875.53418 | 1438.77441 | 2 | 27 | 17.363  | 19.55 |
| 3 | 59.71 | 61.81 | 4                   |                                                         |                                                                                                 |                             |             |            |          |            |            |   |    |         |       |

|   |       |       |      |                |      |                                 |                                                                    |                   |             |            |            |            |            |    |         |         |       |
|---|-------|-------|------|----------------|------|---------------------------------|--------------------------------------------------------------------|-------------------|-------------|------------|------------|------------|------------|----|---------|---------|-------|
| 3 | 59.71 | 61.81 | 49.8 | VANGL1_FlexIII | 99.0 | DSSHNELYYEEAEHER                | Label:13C(6)15N(4)(R)@16                                           | -0.00404695       | 2016.82837  | 673.2834   | 2016.83252 | 673.28479  | 3          | 20 | 12.9361 | 19.55   |       |
| 3 | 59.71 | 61.81 | 49.8 | VANGL1_FlexIII | 99.0 | DSSHNELYYEEAEHER                | Label:13C(6)15N(4)(R)@16                                           | -0.00027803       | 2016.83215  | 505.2153   | 2016.83252 | 505.215393 | 4          | 15 | 12.6593 | 19.55   |       |
| 3 | 59.71 | 61.81 | 49.8 | VANGL1_FlexIII | 99.0 | EAAQAIFPSMAR                    | Label:13C(6)15N(4)(R)@12                                           | -0.00079027       | 1300.64673  | 651.3306   | 1300.64734 | 651.330933 | 2          | 13 | 14.7858 | 19.55   |       |
| 3 | 59.71 | 61.81 | 49.8 | VANGL1_FlexIII | 99.0 | EAAQAIFPSMAR                    | Label:13C(6)15N(4)(R)@12                                           | 0.0099977         | 1300.65723  | 434.5597   | 1300.64734 | 434.556397 | 3          | 12 | 14.856  | 19.55   |       |
| 3 | 59.71 | 61.81 | 49.8 | VANGL1_FlexIII | 99.0 | EAAQAIFPSMAR                    | Label:13C(6)15N(4)(R)@11                                           | 0.00589108        | 1290.64502  | 646.3298   | 1290.63904 | 646.326782 | 2          | 12 | 14.8887 | 19.55   |       |
| 3 | 59.71 | 61.81 | 49.8 | VANGL1_FlexIII | 99.0 | FYSLGHLISIQR                    | Label:13C(6)15N(4)(R)@11                                           | -0.0021247        | 1329.70483  | 665.8597   | 1329.70691 | 665.860718 | 2          | 13 | 14.8093 | 19.55   |       |
| 3 | 59.71 | 61.81 | 49.8 | VANGL1_FlexIII | 99.0 | HMAGLK                          | Label:13C(6)15N(2)(K)@6                                            | -0.000914         | 663.360901  | 332.6877   | 663.361755 | 332.688171 | 2          | 7  | 9.8857  | 19.55   |       |
| 3 | 59.71 | 61.81 | 49.8 | VANGL1_FlexIII | 99.0 | HMAGLK                          | Label:13C(6)15N(2)(K)@6                                            | 0.00311432        | 663.364868  | 332.6897   | 663.361755 | 332.688171 | 2          | 7  | 9.6093  | 19.55   |       |
| 3 | 59.71 | 61.81 | 49.8 | VANGL1_FlexIII | 99.0 | HMAGLK                          | Label:13C(6)15N(2)(K)@6                                            | 0.00311432        | 663.364868  | 332.6897   | 663.361755 | 332.688171 | 2          | 7  | 10.157  | 19.55   |       |
| 3 | 59.71 | 61.81 | 49.8 | VANGL1_FlexIII | 99.0 | IPFIILSEEFIDPK                  | Label:13C(6)15N(2)(K)@14                                           | 0.00062242        | 1667.92712  | 556.983    | 1667.92651 | 556.982788 | 3          | 15 | 17.934  | 19.55   |       |
| 3 | 59.71 | 61.81 | 49.8 | VANGL1_FlexIII | 99.0 | KIPFIILSEEFIDPK                 | Label:13C(6)15N(2)(K)@1; Label:13C(6)15N(2)(K)@15                  | 0.00218669        | 1804.03796  | 602.3533   | 1804.03577 | 602.352539 | 3          | 19 | 17.429  | 19.55   |       |
| 3 | 59.71 | 61.81 | 49.8 | VANGL1_FlexIII | 99.0 | KIPFIILSEEFIDPK                 | Label:13C(6)15N(2)(K)@1; Label:13C(6)15N(2)(K)@15                  | missed K-I@1      | 0.00183573  | 1804.03772 | 903.0261   | 1804.03577 | 903.025147 | 2  | 21      | 17.515  | 19.55 |
| 3 | 59.71 | 61.81 | 49.8 | VANGL1_FlexIII | 99.0 | KIPFIILSEEFIDPK                 | Label:13C(6)15N(2)(K)@1; Label:13C(6)15N(2)(K)@15                  | missed K-I@1      | -0.00843343 | 1804.02722 | 602.3497   | 1804.03577 | 602.352539 | 3  | 14      | 17.1714 | 19.55 |
| 3 | 59.71 | 61.81 | 49.8 | VANGL1_FlexIII | 99.0 | KIPFIILSEEFIDPK                 | Label:13C(6)15N(2)(K)@1; Label:13C(6)15N(2)(K)@15                  | missed K-I@1      | 0.00696269  | 1804.04273 | 903.0286   | 1804.03577 | 903.025147 | 2  | 14      | 17.2547 | 19.55 |
| 3 | 59.71 | 61.81 | 49.8 | VANGL1_FlexIII | 99.0 | KIPFIILSEEFIDPK                 | Label:13C(6)15N(2)(K)@1; Label:13C(6)15N(2)(K)@15                  | missed K-I@1      | -0.0107375  | 1804.02502 | 903.0198   | 1804.03577 | 903.025147 | 2  | 14      | 17.7679 | 19.55 |
| 3 | 59.71 | 61.81 | 49.8 | VANGL1_FlexIII | 99.0 | KIPFIILSEEFIDPK                 | Label:13C(6)15N(2)(K)@1; Label:13C(6)15N(2)(K)@15                  | missed K-I@1      | 0.00420085  | 1804.0398  | 602.3539   | 1804.03577 | 602.352539 | 3  | 11      | 24.5426 | 19.55 |
| 3 | 59.71 | 61.81 | 49.8 | VANGL1_FlexIII | 99.0 | LQAEQQKAPGEVMDPR                | Deamidated(Q)@7; Label:13C(6)15N(2)(K)@8; Label:13C(6)15N(4)(R)@17 | 0.0271758         | 1943.96484  | 972.9897   | 1943.93774 | 972.976135 | 2          | 17 | 12.4436 | 19.55   |       |
| 3 | 59.71 | 61.81 | 49.8 | VANGL1_FlexIII | 99.0 | LQAEQQKAPGEVMDPR                | Label:13C(6)15N(2)(K)@8; Label:13C(6)15N(4)(R)@17                  | missed K-A@8      | 0.00354665  | 1942.9574  | 648.6597   | 1942.95374 | 648.658508 | 3  | 15      | 12.693  | 19.55 |
| 3 | 59.71 | 61.81 | 49.8 | VANGL1_FlexIII | 99.0 | LQSETSVYPTFLYK                  | Label:13C(6)15N(2)(K)@14                                           | -0.00072184       | 1682.86401  | 842.4393   | 1682.86475 | 842.439636 | 2          | 16 | 15.8195 | 19.55   |       |
| 3 | 59.71 | 61.81 | 49.8 | VANGL1_FlexIII | 99.0 | LQSETSVYPTFLYK                  | Label:13C(6)15N(2)(K)@14                                           | 0.00025472        | 1682.86511  | 842.4398   | 1682.86475 | 842.439636 | 2          | 14 | 24.3972 | 19.55   |       |
| 3 | 59.71 | 61.81 | 49.8 | VANGL1_FlexIII | 99.0 | LQSETSVYPTFLYK                  | Label:13C(6)15N(2)(K)@14                                           | -0.00726786       | 1682.85754  | 561.9598   | 1682.86475 | 561.962158 | 3          | 14 | 15.5998 | 19.55   |       |
| 3 | 59.71 | 61.81 | 49.8 | VANGL1_FlexIII | 99.0 | LQSETSVYPTFLYK                  | Label:13C(6)15N(2)(K)@12; Label:13C(6)15N(2)(K)@20                 | -0.0056635        | 1674.84485  | 838.4297   | 1674.85046 | 838.432495 | 2          | 12 | 15.6338 | 19.55   |       |
| 3 | 59.71 | 61.81 | 49.8 | VANGL1_FlexIII | 99.0 | LVSDEAVTNGLRDGI/VFLK            | Label:13C(6)15N(4)(R)@12; Label:13C(6)15N(2)(K)@20                 | -0.00923228       | 2162.19727  | 721.7397   | 2162.20654 | 721.742798 | 3          | 12 | 16.725  | 19.55   |       |
| 3 | 59.71 | 61.81 | 49.8 | VANGL1_FlexIII | 99.0 | LVAVEEAFIHQIR                   | Label:13C(6)15N(4)(R)@14                                           | -0.00111538       | 1632.92163  | 817.4681   | 1632.92273 | 817.468628 | 2          | 18 | 16.0813 | 19.55   |       |
| 3 | 59.71 | 61.81 | 49.8 | VANGL1_FlexIII | 99.0 | LVAVEEAFIHQIR                   | Label:13C(6)15N(4)(R)@14                                           | 0.00218052        | 1632.92493  | 817.4697   | 1632.92273 | 817.468628 | 2          | 15 | 24.5257 | 19.55   |       |
| 3 | 59.71 | 61.81 | 49.8 | VANGL1_FlexIII | 99.0 | LVAVEEAFIHQIR                   | Label:13C(6)15N(4)(R)@14                                           | -0.00583034       | 1632.91699  | 545.3129   | 1632.92273 | 545.314819 | 3          | 14 | 16.0554 | 19.55   |       |
| 3 | 59.71 | 61.81 | 49.8 | VANGL1_FlexIII | 99.0 | LVAVEEAFIHQIR                   | Label:13C(6)15N(4)(R)@14                                           | -0.00070339       | 1632.92188  | 545.3146   | 1632.92273 | 545.314819 | 3          | 14 | 16.3266 | 19.55   |       |
| 3 | 59.71 | 61.81 | 49.8 | VANGL1_FlexIII | 99.0 | LVAVEEAFIHQIR                   | Label:13C(6)15N(4)(R)@14                                           | 0.00332493        | 1632.92615  | 545.316    | 1632.92273 | 545.314819 | 3          | 14 | 16.8886 | 19.55   |       |
| 3 | 59.71 | 61.81 | 49.8 | VANGL1_FlexIII | 99.0 | LVAVEEAFIHQIR                   | Label:13C(6)15N(4)(R)@14                                           | 0.00259251        | 1632.92517  | 545.3157   | 1632.92273 | 545.314819 | 3          | 14 | 17.1646 | 19.55   |       |
| 3 | 59.71 | 61.81 | 49.8 | VANGL1_FlexIII | 99.0 | LVAVEEAFIHQIR                   | Label:13C(6)15N(4)(R)@14                                           | 0.0146775         | 1632.93762  | 545.3198   | 1632.92273 | 545.314819 | 3          | 14 | 17.437  | 19.55   |       |
| 3 | 59.71 | 61.81 | 49.8 | VANGL1_FlexIII | 99.0 | LVAVEEAFIHQIR                   | Label:13C(6)15N(4)(R)@14                                           | -0.0153518        | 1632.90759  | 545.3098   | 1632.92273 | 545.314819 | 3          | 14 | 17.6969 | 19.55   |       |
| 3 | 59.71 | 61.81 | 49.8 | VANGL1_FlexIII | 99.0 | LVAVEEAFIHQIR                   | Label:13C(6)15N(4)(R)@14                                           | 0.00218052        | 1632.92493  | 817.4697   | 1632.92273 | 817.468628 | 2          | 13 | 17.2638 | 19.55   |       |
| 3 | 59.71 | 61.81 | 49.8 | VANGL1_FlexIII | 99.0 | LVAVEEAFIHQIR                   | Label:13C(6)15N(4)(R)@14                                           | -0.00180202       | 1632.92102  | 545.3143   | 1632.92273 | 545.314819 | 3          | 12 | 24.5014 | 19.55   |       |
| 3 | 59.71 | 61.81 | 49.8 | VANGL1_FlexIII | 99.0 | LQOPMTLQVVR                     | Label:13C(6)15N(4)(R)@12                                           | -0.00510325       | 1468.80493  | 735.4097   | 1468.80994 | 735.412293 | 2          | 11 | 16.224  | 19.55   |       |
| 3 | 59.71 | 61.81 | 49.8 | VANGL1_FlexIII | 99.0 | SVTIQPTPEGLLGNDSR               | Deamidated(Q)@5; Label:13C(6)15N(4)(R)@19                          | 0.00348416        | 1992.00769  | 665.0098   | 1992.00391 | 665.00806  | 3          | 17 | 14.8173 | 19.55   |       |
| 3 | 59.71 | 61.81 | 49.8 | VANGL1_FlexIII | 99.0 | SVTIQPTPEGLLGNDSR               | Deamidated(Q)@5; Label:13C(6)15N(4)(R)@19                          | 0.0210775         | 1992.02502  | 997.0198   | 1992.00391 | 997.009216 | 2          | 15 | 14.7244 | 19.55   |       |
| 3 | 59.71 | 61.81 | 49.8 | VANGL1_FlexIII | 99.0 | SVTIQPTPEGLLGNDSR               | Deamidated(Q)@5; Label:13C(6)15N(4)(R)@19                          | 0.0210775         | 1992.02502  | 997.0198   | 1992.00391 | 997.009216 | 2          | 13 | 24.5059 | 19.55   |       |
| 3 | 59.71 | 61.81 | 49.8 | VANGL1_FlexIII | 99.0 | TEEVQDDNMGWETTITATGTSEHSISQEDAR | Deamidated(N)@8; Label:13C(6)15N(4)(R)@31                          | 0.0215424         | 3430.53833  | 1144.52    | 3430.51587 | 1144.51257 | 3          | 21 | 14.5255 | 19.55   |       |
| 3 | 59.71 | 61.81 | 49.8 | VANGL1_FlexIII | 99.0 | TSVYPTFLYK                      | Label:13C(6)15N(2)(K)@10                                           | -0.00071698       | 1225.64673  | 613.8306   | 1225.64746 | 613.830994 | 2          | 11 | 15.2923 | 19.55   |       |
| 3 | 59.71 | 61.81 | 49.8 | VANGL1_FlexIII | 99.0 | TSVYPTFLYK                      | Label:13C(6)15N(2)(K)@10                                           | missed E-T@N-term | -0.0030195  | 1217.63294 | 609.8237   | 1217.63318 | 609.823914 | 2  | 11      | 15.3486 | 19.55 |
| 3 | 59.71 | 61.81 | 49.8 | VANGL1_FlexIII | 99.0 | TSVYPTFLYK                      | Label:13C(6)15N(2)(K)@10                                           | missed E-T@N-term | -0.00120526 | 1225.64624 | 613.8304   | 1225.64746 | 613.830994 | 2  | 11      | 15.5532 | 19.55 |
| 3 | 59.71 | 61.81 | 49.8 | VANGL1_FlexIII | 99.0 | TSVYPTFLYK                      | Label:13C(6)15N(2)(K)@10                                           | missed E-T@N-term | -0.00059491 | 1225.64685 | 613.8307   | 1225.64746 | 613.830994 | 2  | 11      | 15.8636 | 19.55 |
| 3 | 59.71 | 61.81 | 49.8 | VANGL1_FlexIII | 99.0 | TSVYPTFLYK                      | Label:13C(6)15N(2)(K)@10                                           | missed E-T@N-term | 1.54E-05    | 1225.64746 | 613.831    | 1225.64746 | 613.830994 | 2  | 8       | 25.6157 | 19.55 |
| 3 | 59.71 | 61.81 | 49.8 | VANGL1_FlexIII | 99.0 | TSVYPTFLYK                      | Label:13C(6)15N(2)(K)@10                                           | missed E-T@N-term | -0.00132733 | 1225.64612 | 613.8303   | 1225.64746 | 613.830994 | 2  | 9       | 25.0926 | 19.55 |
| 3 | 59.71 | 61.81 | 49.8 | VANGL1_FlexIII | 99.0 | TSVYPTFLYK                      | Label:13C(6)15N(2)(K)@10                                           | missed E-T@N-term | 0.00660723  | 1225.65405 | 613.8343   | 1225.64746 | 613.830994 | 2  | 6       | 26.4127 | 19.55 |
| 3 | 59.71 | 61.81 | 49.8 | VANGL1_FlexIII | 99.0 | TSVYPTFLYK                      | Label:13C(6)15N(2)(K)@10                                           | missed E-T@N-term | 0.00062579  | 1225.64807 | 613.8313   | 1225.64746 | 613.830994 | 2  | 6       | 26.6693 | 19.55 |
| 3 | 59.71 | 61.81 | 49.8 | VANGL1_FlexIII | 99.0 | TSVYPTFLYK                      | Label:13C(6)15N(2)(K)@10                                           | missed E-T@N-term | 0.00038165  | 1225.64783 | 613.8312   | 1225.64746 | 613.830994 | 2  | 10      | 16.419  | 19.55 |
| 3 | 59.71 | 61.81 | 49.8 | VANGL1_FlexIII | 99.0 | TSVYPTFLYK                      | Label:13C(6)15N(2)(K)@10                                           | missed E-T@N-term | -0.00132733 | 1225.64612 | 613.8303   | 1225.64746 | 613.830994 | 2  | 10      | 17.0098 | 19.55 |
| 3 | 59.71 | 61.81 | 49.8 | VANGL1_FlexIII | 99.0 | TSVYPTFLYK                      | Label:13C(6)15N(2)(K)@10                                           | missed E-T@N-term | -0.00132733 | 1225.64612 | 613.8303   | 1225.64746 | 613.830994 | 2  | 9       | 18.441  | 19.55 |
| 3 | 59.71 | 61.81 | 49.8 | VANGL1_FlexIII | 99.0 | TSVYPTFLYK                      | Label:13C(6)15N(2)(K)@10                                           | missed E-T@N-term | -0.00132733 | 1225.64612 | 613.8303   | 1225.64746 | 613.830994 | 2  | 9       | 18.1405 | 19.55 |
| 3 | 59.71 | 61.81 | 49.8 | VANGL1_FlexIII | 99.0 | TSVYPTFLYK                      | Label:13C(6)15N(2)(K)@10                                           | missed E-T@N-term | 0.00245684  | 1225.6499  | 613.8322   | 1225.64746 | 613.830994 | 2  | 9       | 24.2937 | 19.55 |
| 3 | 59.71 | 61.81 | 49.8 | VANGL1_FlexIII | 99.0 | TSVYPTFLYK                      | Label:13C(6)15N(2)(K)@10                                           | missed E-T@N-term | -0.00132733 | 1225.64612 | 613.8303   | 1225.64746 | 613.830994 | 2  | 8       | 19.2216 | 19.55 |
| 3 | 59.71 | 61.81 | 49.8 | VANGL1_FlexIII | 99.0 | TSVYPTFLYK                      | Label:13C(6)15N(2)(K)@10                                           | missed E-T@N-term | -0.00132733 | 1225.64612 | 613.8303   | 1225.64746 | 613.830994 | 2  | 6       | 26.927  | 19.55 |
| 3 | 59.71 | 61.81 | 49.8 | VANGL1_FlexIII | 99.0 | TSVYPTFLYK                      | Label:13C(6)15N(2)(K)@10                                           | missed E-T@N-term | -0.00132733 | 1225.64612 | 613.8303   | 1225.64746 | 613.830994 | 2  | 8       | 24.8077 | 19.55 |
| 3 | 59.71 | 61.81 | 49.8 | VANGL1_FlexIII | 99.0 | TSVYPTFLYK                      | Label:13C(6)15N(2)(K)@10                                           | missed E-T@N-term | -0.00132733 | 1225.64612 | 613.8303   | 1225.64746 | 613.830994 | 2  | 8       | 18.9697 | 19.55 |
| 3 | 59.71 | 61.81 | 49.8 | VANGL1_FlexIII | 99.0 | VYNDGSPSNATGQSR                 | Label:13C(6)15N(4)(R)@16                                           | -0.00166321       | 1687.77722  | 563.5997   | 1687.77893 | 563.600281 | 3          | 16 | 11.5156 | 19.55   |       |
| 3 | 59.71 | 61.81 | 49.8 | VANGL1_FlexIII | 99.0 | VYNDGSPSNATGQSR                 | Label:13C(6)15N(4)(R)@16                                           | 0.00054931        | 1687.77942  | 844.897    | 1687.77893 | 844.896729 | 2          | 16 | 11.5715 | 19.55   |       |
| 3 | 59.71 | 61.81 | 49.8 | VANGL1_FlexIII | 99.0 | VYNDGSPSNATGQSR                 | Label:13C(6)15N(4)(R)@16                                           | -0.00038148       | 1687.77881  | 563.6002   | 1687.77893 | 563.600281 | 3          | 18 | 12.0406 | 19.55   |       |
| 3 | 59.71 | 61.81 | 49.8 | VANGL1_FlexIII | 99.0 | VYNDGSPSNATGQSR                 |                                                                    |                   |             |            |            |            |            |    |         |         |       |

|   |       |       |                   |                                           |                                                                                                             |                                 |             |            |          |            |            |   |    |         |       |
|---|-------|-------|-------------------|-------------------------------------------|-------------------------------------------------------------------------------------------------------------|---------------------------------|-------------|------------|----------|------------|------------|---|----|---------|-------|
| 4 | 58.79 | 60.84 | 74.2 TCP10_FlexII | 99.0 ESHTLALEPAFGK                        |                                                                                                             |                                 | 0.00185414  | 1398.71619 | 467.246  | 1398.71436 | 467.245392 | 3 | 13 | 14.182  | 15.28 |
| 4 | 58.79 | 60.84 | 74.2 TCP10_FlexII | 99.0 IMHPSSR                              | Label: 13C(6)15N(4)(R) @ 7                                                                                  |                                 | 0.00249773  | 836.422669 | 419.2186 | 836.420227 | 419.217377 | 2 | 7  | 8.5187  | 15.28 |
| 4 | 58.79 | 60.84 | 74.2 TCP10_FlexII | 99.0 ISPLSADEETTPK                        |                                                                                                             |                                 | -0.00147094 | 1386.68652 | 694.3505 | 1386.68787 | 694.351196 | 2 | 16 | 13.1979 | 15.28 |
| 4 | 58.79 | 60.84 | 74.2 TCP10_FlexII | 99.0 LQSHMDALRK                           | Label: 13C(6)15N(2)(K) @ 1; Label: 13C(6)15N(4)(R) @ 10; Label: 13C(6)15N(2)(K) @ 11                        | missed K-L @ 1; missed R-K @ 10 | 0.00608618  | 1351.76672 | 676.8906 | 1351.7605  | 676.887512 | 2 | 13 | 11.2886 | 15.28 |
| 4 | 58.79 | 60.84 | 74.2 TCP10_FlexII | 99.0 KSPVQASQATTLOEQTAAR                  | Label: 13C(6)15N(2)(K) @ 1; Label: 13C(6)15N(4)(R) @ 20                                                     | missed K-S @ 1                  | -0.00441406 | 2103.09985 | 702.0405 | 2103.104   | 702.041931 | 3 | 24 | 12.7346 | 15.28 |
| 4 | 58.79 | 60.84 | 74.2 TCP10_FlexII | 99.0 KQSQATLLGQR                          | Label: 13C(6)15N(2)(K) @ 1; Label: 13C(6)15N(4)(R) @ 11                                                     | missed K-S @ 1                  | -0.00272452 | 1205.68213 | 402.9013 | 1205.68469 | 402.902191 | 3 | 10 | 12.1459 | 15.28 |
| 4 | 58.79 | 60.84 | 74.2 TCP10_FlexII | 99.0 LQSHMDALR                            | Label: 13C(6)15N(4)(R) @ 9                                                                                  |                                 | -0.00043817 | 1079.54163 | 540.7781 | 1079.54211 | 540.77832  | 2 | 12 | 12.2457 | 15.28 |
| 4 | 58.79 | 60.84 | 74.2 TCP10_FlexII | 99.0 LQSHMDALRK                           | Label: 13C(6)15N(4)(R) @ 9; Label: 13C(6)15N(2)(K) @ 10                                                     | missed R-K @ 9                  | -0.00932093 | 1215.64209 | 406.2213 | 1215.65125 | 406.224365 | 3 | 9  | 11.4451 | 15.28 |
| 4 | 58.79 | 60.84 | 74.2 TCP10_FlexII | 99.0 MKKEEVQEEK                           | Label: 13C(6)15N(2)(K) @ 2; Label: 13C(6)15N(2)(K) @ 3; Label: 13C(6)15N(2)(K) @ 10                         | missed K-K @ 2; missed K-E @ 3  | 0.0158617   | 1300.69177 | 434.5712 | 1300.6759  | 434.565918 | 3 | 9  | 7.0729  | 15.28 |
| 4 | 58.79 | 60.84 | 74.2 TCP10_FlexII | 99.0 MLEQGLEAGEPK                         | Label: 13C(6)15N(2)(K) @ 12                                                                                 |                                 | -0.00083747 | 1308.64673 | 655.3306 | 1308.64746 | 655.331055 | 2 | 11 | 13.3317 | 15.28 |
| 4 | 58.79 | 60.84 | 74.2 TCP10_FlexII | 99.0 QNLVPNPPSSLEIAQAMDTK                 | Gln->pyro-Glu @ N-term                                                                                      |                                 | 0.00759878  | 2135.06543 | 1068.54  | 2135.05689 | 1068.53577 | 2 | 17 | 16.4498 | 15.28 |
| 4 | 58.79 | 60.84 | 74.2 TCP10_FlexII | 99.0 QGSLWADIHR                           | Gln->pyro-Glu @ N-term; Label: 13C(6)15N(4)(R) @ 10                                                         |                                 | 0.00064278  | 1245.61365 | 623.8141 | 1245.61304 | 623.813782 | 2 | 13 | 15.3517 | 15.28 |
| 4 | 58.79 | 60.84 | 74.2 TCP10_FlexII | 99.0 QGSLWADIHRK                          | Gln->pyro-Glu @ N-term; Label: 13C(6)15N(4)(R) @ 10; Label: 13C(6)15N(2)(K) @ 11                            | missed R-K @ 10                 | -0.00146612 | 1381.7207  | 691.8676 | 1381.72217 | 691.868347 | 2 | 13 | 14.5191 | 15.28 |
| 4 | 58.79 | 60.84 | 74.2 TCP10_FlexII | 99.0 QQWEAGKKPAASPHAGR                    | Gln->pyro-Glu @ N-term; Label: 13C(6)15N(2)(K) @ 7; Label: 13C(6)15N(2)(K) @ 8; Label: 13C(6)15N(4)(R) @ 17 | missed K-K @ 7                  | -0.00326968 | 1826.9353  | 457.7411 | 1826.9386  | 457.741943 | 4 | 11 | 11.6696 | 15.28 |
| 4 | 58.79 | 60.84 | 74.2 TCP10_FlexII | 99.0 RSGFPSEFPGALHAAPSR                   | Label: 13C(6)15N(4)(R) @ 1; Label: 13C(6)15N(4)(R) @ 18                                                     | missed R-S @ 1                  | 0.00323093  | 1902.96375 | 476.7482 | 1902.96033 | 476.747376 | 4 | 15 | 14.0162 | 15.28 |
| 4 | 58.79 | 60.84 | 74.2 TCP10_FlexII | 99.0 RSGFPSEFPGALHAAPSR                   |                                                                                                             |                                 | -0.00581082 | 1726.83704 | 576.6196 | 1726.84277 | 576.621521 | 3 | 10 | 14.6028 | 15.28 |
| 4 | 58.79 | 60.84 | 74.2 TCP10_FlexII | 99.0 SPAPTGRPTPGAER                       | Label: 13C(6)15N(4)(R) @ 7; Label: 13C(6)15N(4)(R) @ 14                                                     |                                 | -0.00117572 | 1412.72632 | 707.3704 | 1412.72754 | 707.371033 | 2 | 12 | 11.1082 | 15.28 |
| 4 | 58.79 | 60.84 | 74.2 TCP10_FlexII | 99.0 SPVQASQATTLOEQTAAR                   | Label: 13C(6)15N(4)(R) @ 19                                                                                 |                                 | -0.00453397 | 1966.99023 | 984.5024 | 1966.99475 | 984.504639 | 2 | 24 | 12.9511 | 15.28 |
| 4 | 58.79 | 60.84 | 74.2 TCP10_FlexII | 99.0 SOSQATLLGQR                          |                                                                                                             |                                 | -1.11E-05   | 1059.56726 | 530.7909 | 1059.56726 | 530.790894 | 2 | 9  | 12.9631 | 15.28 |
| 4 | 58.79 | 60.84 | 74.2 TCP10_FlexII | 99.0 SSSVLGSEGGFLSR                       |                                                                                                             |                                 | -0.00961976 | 1468.7063  | 735.3604 | 1468.71582 | 735.365173 | 2 | 15 | 14.7231 | 15.28 |
| 4 | 58.79 | 60.84 | 74.2 TCP10_FlexII | 99.0 TPAAAEVP                             | Label: 13C(6)15N(4)(R) @ 9                                                                                  |                                 | 0.00097112  | 920.49646  | 461.2555 | 920.495483 | 461.255035 | 2 | 12 | 11.9629 | 15.28 |
| 4 | 58.79 | 60.84 | 74.2 TCP10_FlexII | 99.0 TPAAAEVPREDGNAEEMPSLQQITSLHQELGR     | Label: 13C(6)15N(4)(R) @ 9; Deamidated(N) @ 13; Label: 13C(6)15N(4)(R) @ 33                                 | missed R-E @ 9                  | -0.013096   | 3622.73047 | 906.6899 | 3622.74365 | 906.693176 | 4 | 17 | 15.573  | 15.28 |
| 4 | 58.79 | 60.84 | 74.2 TCP10_FlexII | 99.0 VQADEFASSSPDSAER                     |                                                                                                             |                                 | 0.0072209   | 1694.74573 | 848.3801 | 1694.7384  | 848.376465 | 2 | 18 | 12.8237 | 15.28 |
| 4 | 58.79 | 60.84 | 74.2 TCP10_FlexII | 99.0 VQADEFASSSPDSAERQNLVPNPPSSLEIAQAMDTK | Label: 13C(6)15N(4)(R) @ 16; Deamidated(N) @ 18; Label: 13C(6)15N(2)(K) @ 36                                | missed R-Q @ 16                 | 0.0171128   | 3847.83521 | 1283.619 | 3847.81763 | 1283.61316 | 3 | 17 | 15.4035 | 15.28 |
| 4 | 58.79 | 60.84 | 74.2 TCP10_FlexII | 99.0 WSSNHLAPPKMSLK                       | Label: 13C(6)15N(2)(K) @ 10; Label: 13C(6)15N(2)(K) @ 15                                                    |                                 | -0.0143771  | 1707.89575 | 427.9812 | 1707.91016 | 427.984802 | 4 | 11 | 13.3679 | 15.28 |
| 4 | 58.79 | 60.84 | 74.2 TCP10_FlexII | 99.0 WSSNHLAPPKMSLKTER                    | Label: 13C(6)15N(2)(K) @ 10; Label: 13C(6)15N(2)(K) @ 15; Label: 13C(6)15N(4)(R) @ 18                       | missed K-T @ 15                 | -0.0150289  | 2104.09448 | 527.0309 | 2104.10986 | 527.034729 | 4 | 10 | 13.0355 | 15.28 |
| 4 | 58.79 | 60.84 | 74.2 TCP10_FlexII | 99.0 EGTHPEDPCPGAGAAMEK                   | Propionamide(C) @ 9; Label: 13C(6)15N(2)(K) @ 18                                                            |                                 | -0.00165586 | 1874.80017 | 625.9407 | 1874.80188 | 625.941223 | 3 | 12 | 11.6019 | 15.28 |
| 4 | 58.79 | 60.84 | 74.2 TCP10_FlexII | 99.0 EGTHPEDPCPGAGAAMEK                   | Propionamide(C) @ 9; Label: 13C(6)15N(2)(K) @ 18                                                            |                                 | 0.00050985  | 1874.80225 | 938.4084 | 1874.80188 | 938.408203 | 2 | 12 | 11.6374 | 15.28 |
| 4 | 58.79 | 60.84 | 74.2 TCP10_FlexII | 99.0 EGTHPEDPCPGAGAAMEK                   | Propionamide(C) @ 9; Label: 13C(6)15N(2)(K) @ 18                                                            |                                 | 0.0133903   | 1874.81531 | 469.7111 | 1874.80188 | 469.707733 | 4 | 11 | 11.6439 | 15.28 |
| 4 | 58.79 | 60.84 | 74.2 TCP10_FlexII | 99.0 EGTHPEDPCPGAGAAMEK                   | Propionamide(C) @ 9; Label: 13C(6)15N(2)(K) @ 18                                                            |                                 | -0.00165586 | 1874.80017 | 625.9407 | 1874.80188 | 625.941223 | 3 | 16 | 12.0372 | 15.28 |
| 4 | 58.79 | 60.84 | 74.2 TCP10_FlexII | 99.0 EGTHPEDPCPGAGAAMEK                   | Propionamide(C) @ 9; Oxidation(M) @ 16; Label: 13C(6)15N(2)(K) @ 18                                         |                                 | -0.00656254 | 1890.79028 | 631.2707 | 1890.79675 | 631.272888 | 3 | 13 | 12.1515 | 15.28 |
| 4 | 58.79 | 60.84 | 74.2 TCP10_FlexII | 99.0 EGTHPEDPCPGAGAAMEK                   | Propionamide(C) @ 9; Label: 13C(6)15N(2)(K) @ 18                                                            |                                 | -0.00037413 | 1874.80151 | 625.9411 | 1874.80188 | 625.941223 | 3 | 15 | 12.3044 | 15.28 |
| 4 | 58.79 | 60.84 | 74.2 TCP10_FlexII | 99.0 EGTHPEDPCPGAGAAMEK                   | Propionamide(C) @ 9; Label: 13C(6)15N(2)(K) @ 18                                                            |                                 | -0.00278604 | 1874.79907 | 938.4068 | 1874.80188 | 938.408203 | 2 | 23 | 12.3242 | 15.28 |
| 4 | 58.79 | 60.84 | 74.2 TCP10_FlexII | 99.0 ELREELR                              | Label: 13C(6)15N(4)(R) @ 3; Label: 13C(6)15N(4)(R) @ 7                                                      | missed R-E @ 3                  | 0.00231088  | 963.527649 | 482.7711 | 963.525208 | 482.769898 | 2 | 9  | 11.8071 | 15.28 |
| 4 | 58.79 | 60.84 | 74.2 TCP10_FlexII | 99.0 ELREELR                              | Label: 13C(6)15N(4)(R) @ 3; Label: 13C(6)15N(4)(R) @ 7                                                      | missed R-E @ 3                  | 0.00231088  | 963.527649 | 482.7711 | 963.525208 | 482.769898 | 2 | 9  | 12.0692 | 15.28 |
| 4 | 58.79 | 60.84 | 74.2 TCP10_FlexII | 99.0 ESHTLALEPAFGK                        | Label: 13C(6)15N(2)(K) @ 13                                                                                 |                                 | 0.00215983  | 1406.73071 | 469.9175 | 1406.72852 | 469.916779 | 3 | 13 | 14.1484 | 15.28 |
| 4 | 58.79 | 60.84 | 74.2 TCP10_FlexII | 99.0 ESHTLALEPAFGK                        | Label: 13C(6)15N(2)(K) @ 13                                                                                 |                                 | -0.00022156 | 1406.72852 | 704.3715 | 1406.72852 | 704.371521 | 2 | 20 | 14.1737 | 15.28 |
| 4 | 58.79 | 60.84 | 74.2 TCP10_FlexII | 99.0 ESHTLALEPAFGK                        | Label: 13C(6)15N(2)(K) @ 13                                                                                 |                                 | 0.00124431  | 1406.72974 | 469.9172 | 1406.72852 | 469.916779 | 3 | 13 | 14.4056 | 15.28 |
| 4 | 58.79 | 60.84 | 74.2 TCP10_FlexII | 99.0 ESHTLALEPAFGK                        | Label: 13C(6)15N(2)(K) @ 13                                                                                 |                                 | -0.00217468 | 1406.72644 | 704.3705 | 1406.72852 | 704.371521 | 2 | 17 | 14.4608 | 15.28 |
| 4 | 58.79 | 60.84 | 74.2 TCP10_FlexII | 99.0 ESHTLALEPAFGK                        | Label: 13C(6)15N(2)(K) @ 13                                                                                 |                                 | 0.012963    | 1406.74146 | 469.9211 | 1406.72852 | 469.916779 | 3 | 12 | 14.67   | 15.28 |
| 4 | 58.79 | 60.84 | 74.2 TCP10_FlexII | 99.0 ISPLSADEETTPK                        | Label: 13C(6)15N(2)(K) @ 13                                                                                 |                                 | 0.0043279   | 1394.70642 | 698.3605 | 1394.70203 | 698.358276 | 2 | 14 | 13.1269 | 15.28 |
| 4 | 58.79 | 60.84 | 74.2 TCP10_FlexII | 99.0 ISPLSADEETTPK                        | Label: 13C(6)15N(2)(K) @ 13                                                                                 |                                 | -0.00140939 | 1394.70068 | 698.3576 | 1394.70203 | 698.358276 | 2 | 15 | 13.3862 | 15.28 |
| 4 | 58.79 | 60.84 | 74.2 TCP10_FlexII | 99.0 KSPVQASQATTLOEQTAAR                  | Label: 13C(6)15N(2)(K) @ 1; Label: 13C(6)15N(4)(R) @ 20                                                     | missed K-S @ 1                  | -0.00441406 | 2103.09985 | 702.0405 | 2103.104   | 702.041931 | 3 | 24 | 12.4608 | 15.28 |
| 4 | 58.79 | 60.84 | 74.2 TCP10_FlexII | 99.0 KSPVQASQATTLOEQTAAR                  | Label: 13C(6)15N(2)(K) @ 1; Label: 13C(6)15N(4)(R) @ 20                                                     | missed K-S @ 1                  | 0.00068133  | 2103.10547 | 1052.56  | 2103.104   | 1052.5592  | 2 | 33 | 12.4903 | 15.28 |
| 4 | 58.79 | 60.84 | 74.2 TCP10_FlexII | 99.0 KSPVQASQATTLOEQTAAR                  | Label: 13C(6)15N(2)(K) @ 1; Deamidated(Q) @ 13; Label: 13C(6)15N(4)(R) @ 20                                 | missed K-S @ 1                  | 0.016663    | 2104.10547 | 1053.06  | 2104.08789 | 1053.05127 | 2 | 21 | 12.76   | 15.28 |
| 4 | 58.79 | 60.84 | 74.2 TCP10_FlexII | 99.0 KSPVQASQATTLOEQTAAR                  | Label: 13C(6)15N(2)(K) @ 1; Label: 13C(6)15N(4)(R) @ 20                                                     | missed K-S @ 1                  | -0.00441406 | 2103.09985 | 702.0405 | 2103.104   | 702.041931 | 3 | 21 | 13.5879 | 15.28 |
| 4 | 58.79 | 60.84 | 74.2 TCP10_FlexII | 99.0 KSPVQASQATTLOEQTAAR                  | Label: 13C(6)15N(2)(K) @ 1; Label: 13C(6)15N(4)(R) @ 20                                                     | missed K-S @ 1                  | -0.00441406 | 2103.09985 | 702.0405 | 2103.104   | 702.041931 | 3 | 16 | 24.5753 | 15.28 |
| 4 | 58.79 | 60.84 | 74.2 TCP10_FlexII | 99.0 KSPVQASQATTLOEQTAAR                  | Label: 13C(6)15N(2)(K) @ 1; Deamidated(Q) @ 13; Label: 13C(6)15N(4)(R) @ 20                                 | missed K-S @ 1                  | 0.0316482   | 2104.11963 | 702.3805 | 2104.08789 | 702.369934 | 3 | 7  | 25.4215 | 15.28 |
| 4 | 58.79 | 60.84 | 74.2 TCP10_FlexII | 99.0 KQSQATLLGQR                          | Label: 13C(6)15N(2)(K) @ 1; Label: 13C(6)15N(4)(R) @ 11                                                     | missed K-S @ 1                  | 0.00215725  | 1205.68689 | 603.8507 | 1205.68469 | 603.849609 | 2 | 15 | 12.1652 | 15.28 |
| 4 | 58.79 | 60.84 | 74.2 TCP10_FlexII | 99.0 KQSQATLLGQR                          | Label: 13C(6)15N(2)(K) @ 1; Label: 13C(6)15N(4)(R) @ 11                                                     | missed K-S @ 1                  | 0.00267708  | 1205.6875  | 402.9031 | 1205.68469 | 402.902191 | 3 | 11 | 12.412  | 15.28 |
| 4 | 58.79 | 60.84 | 74.2 TCP10_FlexII | 99.0 LQSHMDALRK                           | Label: 13C(6)15N(4)(R) @ 9; Label: 13C(6)15N(2)(K) @ 10                                                     | missed R-K @ 9                  | -0.00437813 | 1215.64685 | 608.8307 | 1215.65125 | 608.832947 | 2 | 12 | 11.4861 | 15.28 |
| 4 | 58.79 | 60.84 | 74.2 TCP10_FlexII | 99.0 MKKEEVQEEK                           | Label: 13C(6)15N(2)(K) @ 2; Label: 13C(6)15N(2)(K) @ 3; Label: 13C(6)15N(2)(K) @ 10                         | missed K-K @ 2; missed K-E @ 3  | 0.0158617   | 1300.69177 | 434.5712 | 1300.6759  | 434.565918 | 3 | 11 | 7.3463  | 15.28 |
| 4 | 58.79 | 60.84 | 74.2 TCP10_FlexII | 99.0 QNLVPNPPSSLEIAQAMDTK                 | Deamidated(N) @ 6; Label: 13C(6)15N(2)(K) @ 20                                                              |                                 | 0.00775955  | 2161.08936 | 721.3704 | 2161.08154 | 721.367798 | 3 | 14 | 15.2745 | 15.28 |
| 4 | 58.79 | 60.84 | 74.2 TCP10_FlexII | 99.0 QNLVPNPPSSLEIAQAMDTK                 | Label: 13C(6)15N(2)(K) @ 20                                                                                 |                                 | 0.00172654  | 2160.09937 | 721.0404 | 2160.09766 | 721.039795 | 3 | 19 | 15.5594 | 15.28 |
| 4 | 58.79 | 60.84 | 74.2 TCP10_FlexII | 99.0 QNLVPNPPSSLEIAQAMDTK                 | Label: 13C(6)15N(2)(K) @ 20                                                                                 |                                 | -0.0131975  | 2160.08325 | 1081.049 | 2160.09766 | 1081.05603 | 2 | 21 | 15.5855 | 15.28 |
| 4 | 58.79 | 60.84 | 74.2 TCP10_FlexII | 99.0 QNLVPNPPSSLEIAQAMDTK                 | Label: 13C(6)15N(2)(K) @ 20                                                                                 |                                 | -0.00562921 | 2160.09131 | 1081.053 | 2160.09766 | 1081.05603 | 2 | 22 | 15.8567 | 15.28 |
| 4 | 58.79 | 60.84 | 74.2 TCP10_FlexII | 99.0 QNLVPNPPSSLEIAQAMDTK                 | Label: 13C(6)15N(2)(K) @ 20                                                                                 |                                 | 0.00172654  | 2160.09937 | 721.0404 | 2160.09766 | 721.039795 | 3 | 19 | 15.859  | 15.28 |
| 4 | 58.79 | 60.84 | 74.2 TCP10_FlexII | 99.0 QNLVPNPPSSLEIAQAMDTK                 | Deamidated(N) @                                                                                             |                                 |             |            |          |            |            |   |    |         |       |

|   |       |       |                   |                                       |                                                                                                             |                                 |             |             |          |            |            |   |    |         |       |
|---|-------|-------|-------------------|---------------------------------------|-------------------------------------------------------------------------------------------------------------|---------------------------------|-------------|-------------|----------|------------|------------|---|----|---------|-------|
| 4 | 58.79 | 60.84 | 74.2 TCP10_FlexII | 99.0 QQWEAGKKPAASPHAGR                | Label: 13C(6)15N(2)(K) @ 7; Label: 13C(6)15N(2)(K) @ 8; Label: 13C(6)15N(4)(R) @ 17                         | missed K-K @ 7                  | 0.00333819  | 1843.96851  | 461.9994 | 1843.96521 | 461.998566 | 4 | 10 | 11.0301 | 15.28 |
| 4 | 58.79 | 60.84 | 74.2 TCP10_FlexII | 99.0 QQWEAGKKPAASPHAGR                | Label: 13C(6)15N(2)(K) @ 7; Label: 13C(6)15N(2)(K) @ 8; Label: 13C(6)15N(4)(R) @ 17                         | missed K-K @ 7                  | 0.00581113  | 1843.97119  | 369.8015 | 1843.96521 | 369.800324 | 5 | 9  | 11.0559 | 15.28 |
| 4 | 58.79 | 60.84 | 74.2 TCP10_FlexII | 99.0 QQWEAGKKPAASPHAGR                | Gln->pyro-Glu @ N-term; Label: 13C(6)15N(2)(K) @ 7; Label: 13C(6)15N(2)(K) @ 8; Label: 13C(6)15N(4)(R) @ 17 | missed K-K @ 7                  | 0.0116523   | 1826.95032  | 609.9907 | 1826.9386  | 609.96816  | 3 | 15 | 11.6258 | 15.28 |
| 4 | 58.79 | 60.84 | 74.2 TCP10_FlexII | 99.0 RSGFPSEFFGALHAAPSR               | Label: 13C(6)15N(4)(R) @ 1; Label: 13C(6)15N(4)(R) @ 18                                                     | missed R-S @ 1                  | 0.00979116  | 1902.97022  | 635.3307 | 1902.96033 | 635.327393 | 3 | 18 | 13.9601 | 15.28 |
| 4 | 58.79 | 60.84 | 74.2 TCP10_FlexII | 99.0 SGFPSEFFGALHAAPSR                | Label: 13C(6)15N(4)(R) @ 17                                                                                 |                                 | -6.87E-05   | 1736.85095  | 579.9576 | 1736.85095 | 579.957581 | 3 | 14 | 14.5115 | 15.28 |
| 4 | 58.79 | 60.84 | 74.2 TCP10_FlexII | 99.0 SGFPSEFFGALHAAPSR                | Label: 13C(6)15N(4)(R) @ 17                                                                                 |                                 | -0.00553241 | 1736.84546  | 869.43   | 1736.85095 | 869.4328   | 2 | 21 | 14.5381 | 15.28 |
| 4 | 58.79 | 60.84 | 74.2 TCP10_FlexII | 99.0 SGFPSEFFGALHAAPSR                | Label: 13C(6)15N(4)(R) @ 17                                                                                 |                                 | 0.00048057  | 1736.85169  | 579.9578 | 1736.85095 | 579.957581 | 3 | 13 | 14.6495 | 15.28 |
| 4 | 58.79 | 60.84 | 74.2 TCP10_FlexII | 99.0 SGFPSEFFGALHAAPSR                | Label: 13C(6)15N(4)(R) @ 17                                                                                 |                                 | 0.0046625   | 1736.85571  | 435.2212 | 1736.85095 | 435.220332 | 4 | 12 | 14.6733 | 15.28 |
| 4 | 58.79 | 60.84 | 74.2 TCP10_FlexII | 99.0 SGFPSEFFGALHAAPSR                | Label: 13C(6)15N(4)(R) @ 17                                                                                 |                                 | -0.00061806 | 1736.85034  | 579.9574 | 1736.85095 | 579.957581 | 3 | 13 | 14.7931 | 15.28 |
| 4 | 58.79 | 60.84 | 74.2 TCP10_FlexII | 99.0 SGFPSEFFGALHAAPSR                | Label: 13C(6)15N(4)(R) @ 17                                                                                 |                                 | -0.00553241 | 1736.84546  | 869.43   | 1736.85095 | 869.4328   | 2 | 21 | 14.8169 | 15.28 |
| 4 | 58.79 | 60.84 | 74.2 TCP10_FlexII | 99.0 SGFPSEFFGALHAAPSR                | Label: 13C(6)15N(4)(R) @ 17                                                                                 |                                 | 0.00963582  | 1736.8606   | 579.9608 | 1736.85095 | 579.957581 | 3 | 14 | 15.0655 | 15.28 |
| 4 | 58.79 | 60.84 | 74.2 TCP10_FlexII | 99.0 SGFPSEFFGALHAAPSR                | Label: 13C(6)15N(4)(R) @ 17                                                                                 |                                 | 0.00963582  | 1736.8606   | 579.9608 | 1736.85095 | 579.957581 | 3 | 13 | 17.4822 | 15.28 |
| 4 | 58.79 | 60.84 | 74.2 TCP10_FlexII | 99.0 SGFPSEFFGALHAAPSR                | Label: 13C(6)15N(4)(R) @ 17                                                                                 |                                 | 0.00963582  | 1736.8606   | 579.9608 | 1736.85095 | 579.957581 | 3 | 11 | 24.5293 | 15.28 |
| 4 | 58.79 | 60.84 | 74.2 TCP10_FlexII | 99.0 SPAPTGRPTPGAER                   | Label: 13C(6)15N(4)(R) @ 7; Label: 13C(6)15N(4)(R) @ 14                                                     |                                 | 0.00901919  | 1412.73657  | 354.1914 | 1412.72754 | 354.189148 | 4 | 9  | 10.809  | 15.28 |
| 4 | 58.79 | 60.84 | 74.2 TCP10_FlexII | 99.0 SPAPTGRPTPGAER                   | Label: 13C(6)15N(4)(R) @ 7; Label: 13C(6)15N(4)(R) @ 14                                                     |                                 | -0.00117572 | 1412.72632  | 707.3704 | 1412.72754 | 707.371033 | 2 | 12 | 10.8409 | 15.28 |
| 4 | 58.79 | 60.84 | 74.2 TCP10_FlexII | 99.0 SPVQASQATTLQEQTAAAR              | Label: 13C(6)15N(4)(R) @ 19                                                                                 |                                 | -0.0001079  | 1966.99475  | 656.6722 | 1966.99475 | 656.67218  | 3 | 23 | 12.9688 | 15.28 |
| 4 | 58.79 | 60.84 | 74.2 TCP10_FlexII | 99.0 SPVQASQATTLQEQTAAAR              | Label: 13C(6)15N(4)(R) @ 19                                                                                 |                                 | 0.0101144   | 1967.00488  | 984.5097 | 1966.99475 | 984.504639 | 2 | 22 | 13.2151 | 15.28 |
| 4 | 58.79 | 60.84 | 74.2 TCP10_FlexII | 99.0 SQSATLLGQR                       | Label: 13C(6)15N(4)(R) @ 10                                                                                 |                                 | 0.00072612  | 1069.57629  | 535.7954 | 1069.57556 | 535.795044 | 2 | 9  | 12.9195 | 15.28 |
| 4 | 58.79 | 60.84 | 74.2 TCP10_FlexII | 99.0 SQSATLLGQR                       | Label: 13C(6)15N(4)(R) @ 10                                                                                 |                                 | 0.0117124   | 1069.58728  | 535.8009 | 1069.57556 | 535.795044 | 2 | 9  | 13.1905 | 15.28 |
| 4 | 58.79 | 60.84 | 74.2 TCP10_FlexII | 99.0 SSSVLGSSEGGFLSR                  | Label: 13C(6)15N(4)(R) @ 15                                                                                 |                                 | -0.0127878  | 1478.71118  | 493.911  | 1478.724   | 493.915283 | 3 | 12 | 13.951  | 15.28 |
| 4 | 58.79 | 60.84 | 74.2 TCP10_FlexII | 99.0 SSSVLGSSEGGFLSR                  | Label: 13C(6)15N(4)(R) @ 15                                                                                 |                                 | -0.0179157  | 1478.7063   | 740.3604 | 1478.724   | 740.369324 | 2 | 17 | 14.6323 | 15.28 |
| 4 | 58.79 | 60.84 | 74.2 TCP10_FlexII | 99.0 SSSVLGSSEGGFLSR                  | Label: 13C(6)15N(4)(R) @ 15                                                                                 |                                 | -0.0127878  | 1478.71118  | 493.911  | 1478.724   | 493.915283 | 3 | 13 | 14.7754 | 15.28 |
| 4 | 58.79 | 60.84 | 74.2 TCP10_FlexII | 99.0 SSSVLGSSEGGFLSR                  | Label: 13C(6)15N(4)(R) @ 15                                                                                 |                                 | -0.00107008 | 1478.72302  | 740.3688 | 1478.724   | 740.369324 | 2 | 17 | 14.8918 | 15.28 |
| 4 | 58.79 | 60.84 | 74.2 TCP10_FlexII | 99.0 SSSVLGSSEGGFLSR                  | Label: 13C(6)15N(4)(R) @ 15                                                                                 |                                 | 0.00210374  | 1478.72632  | 740.3704 | 1478.724   | 740.369324 | 2 | 17 | 17.4621 | 15.28 |
| 4 | 58.79 | 60.84 | 74.2 TCP10_FlexII | 99.0 SSSVLGSSEGGFLSR                  | Label: 13C(6)15N(4)(R) @ 15                                                                                 |                                 | 0.00076097  | 1478.72485  | 740.3697 | 1478.724   | 740.369324 | 2 | 14 | 24.4064 | 15.28 |
| 4 | 58.79 | 60.84 | 74.2 TCP10_FlexII | 99.0 SSSVLGSSEGGFLSR                  | Label: 13C(6)15N(4)(R) @ 15                                                                                 |                                 | 0.00210374  | 1478.72632  | 740.3704 | 1478.724   | 740.369324 | 2 | 7  | 25.0752 | 15.28 |
| 4 | 58.79 | 60.84 | 74.2 TCP10_FlexII | 99.0 TPAAAEVPREDGNAEMPSLQQQITSLHQELGR | Label: 13C(6)15N(4)(R) @ 9; Deamidated(Q) @ 21; Label: 13C(6)15N(4)(R) @ 33                                 | missed R-E @ 9                  | 0.0219697   | 3622.76563  | 725.5604 | 3622.74365 | 725.55603  | 5 | 18 | 15.5536 | 15.28 |
| 4 | 58.79 | 60.84 | 74.2 TCP10_FlexII | 99.0 TPAAAEVPREDGNAEMPSLQQQITSLHQELGR | Label: 13C(6)15N(4)(R) @ 9; Deamidated(Q) @ 21; Label: 13C(6)15N(4)(R) @ 33                                 | missed R-E @ 9                  | -0.013096   | 3622.73047  | 906.6899 | 3622.74365 | 906.693176 | 4 | 19 | 15.8326 | 15.28 |
| 4 | 58.79 | 60.84 | 74.2 TCP10_FlexII | 99.0 TPAAAEVPREDGNAEMPSLQQQITSLHQELGR | Label: 13C(6)15N(4)(R) @ 9; Deamidated(N) @ 13; Label: 13C(6)15N(4)(R) @ 33                                 | missed R-E @ 9                  | 0.026943    | 3622.771    | 906.7    | 3622.74365 | 906.693176 | 4 | 6  | 18.9851 | 15.28 |
| 4 | 58.79 | 60.84 | 74.2 TCP10_FlexII | 99.0 VQADEFASSSPDSAER                 | Label: 13C(6)15N(4)(R) @ 16                                                                                 |                                 | 0.0140321   | 1704.76099  | 569.2609 | 1704.74658 | 569.256165 | 3 | 14 | 12.2199 | 15.28 |
| 4 | 58.79 | 60.84 | 74.2 TCP10_FlexII | 99.0 VQADEFASSSPDSAER                 | Label: 13C(6)15N(4)(R) @ 16                                                                                 |                                 | -0.00107508 | 1704.74573  | 853.3801 | 1704.74658 | 853.380615 | 2 | 19 | 12.7232 | 15.28 |
| 4 | 58.79 | 60.84 | 74.2 TCP10_FlexII | 99.0 VQADEFASSSPDSAER                 | Label: 13C(6)15N(4)(R) @ 16                                                                                 |                                 | 0.00231339  | 1704.74927  | 569.257  | 1704.74658 | 569.256165 | 3 | 17 | 12.7942 | 15.28 |
| 4 | 58.79 | 60.84 | 74.2 TCP10_FlexII | 99.0 VQADEFASSSPDSAER                 | Label: 13C(6)15N(4)(R) @ 16                                                                                 |                                 | -0.00192957 | 1704.74463  | 853.3796 | 1704.74658 | 853.380615 | 2 | 19 | 12.9811 | 15.28 |
| 4 | 58.79 | 60.84 | 74.2 TCP10_FlexII | 99.0 VQADEFASSSPDSAER                 | Label: 13C(6)15N(4)(R) @ 16                                                                                 |                                 | -0.00107508 | 1704.74573  | 853.3801 | 1704.74658 | 853.380615 | 2 | 16 | 13.2395 | 15.28 |
| 4 | 58.79 | 60.84 | 74.2 TCP10_FlexII | 99.0 VQADEFASSSPDSAER                 | Label: 13C(6)15N(4)(R) @ 16                                                                                 |                                 | -0.00107508 | 1704.74573  | 853.3801 | 1704.74658 | 853.380615 | 2 | 9  | 19.2525 | 15.28 |
| 4 | 58.79 | 60.84 | 74.2 TCP10_FlexII | 99.0 WSSNHLAPPKMSLK                   | Label: 13C(6)15N(2)(K) @ 10; Label: 13C(6)15N(2)(K) @ 15                                                    |                                 | 0.00048393  | 1707.91052  | 570.3108 | 1707.91016 | 570.310669 | 3 | 13 | 13.3782 | 15.28 |
| 4 | 58.79 | 60.84 | 74.2 TCP10_FlexII | 99.0 WSSNHLAPPKMSLK                   | Label: 13C(6)15N(2)(K) @ 10; Label: 13C(6)15N(2)(K) @ 15                                                    |                                 | 0.00080514  | 1707.91089  | 570.3109 | 1707.91016 | 570.310669 | 3 | 12 | 13.6455 | 15.28 |
| 4 | 58.79 | 60.84 | 74.2 TCP10_FlexII | 99.0 WSSNHLAPPKMSLK                   | Label: 13C(6)15N(2)(K) @ 10; Label: 13C(6)15N(2)(K) @ 15                                                    |                                 | -0.00455249 | 1707.90564  | 854.9601 | 1707.91016 | 854.962341 | 2 | 9  | 13.4632 | 15.28 |
| 4 | 58.79 | 60.84 | 74.2 TCP10_FlexII | 99.0 WSSNHLAPPKMSLK                   | Label: 13C(6)15N(2)(K) @ 10; Label: 13C(6)15N(2)(K) @ 15                                                    |                                 | -0.00241421 | 1707.90772  | 427.9842 | 1707.91016 | 427.984802 | 4 | 9  | 13.643  | 15.28 |
| 4 | 58.79 | 60.84 | 74.2 TCP10_FlexII | 99.0 WSSNHLAPPKMSLKTER                | Label: 13C(6)15N(2)(K) @ 10; Label: 13C(6)15N(2)(K) @ 15; Label: 13C(6)15N(4)(R) @ 18                       | missed K-T @ 15                 | 0.00987445  | 2104.11963  | 421.8312 | 2104.10986 | 421.829224 | 5 | 12 | 13.0598 | 15.28 |
| 4 | 58.79 | 60.84 | 74.2 TCP10_FlexII | 99.0 YPTFLYK                          | Label: 13C(6)15N(2)(K) @ 7                                                                                  | cleaved P-Y @ N-term            | 0.00057017  | 938.499878  | 470.2572 | 938.499329 | 470.256928 | 2 | 9  | 15.0367 | 15.28 |
| 4 | 58.79 | 60.84 | 74.2 TCP10_FlexII | 99.0 YPTFLYK                          | Label: 13C(6)15N(2)(K) @ 7                                                                                  | cleaved P-Y @ N-term            | 0.00819955  | 938.507446  | 470.261  | 938.499329 | 470.256928 | 2 | 9  | 14.7754 | 15.28 |
| 4 | 58.79 | 60.84 | 74.2 TCP10_FlexII | 99.0 YPTFLYK                          | Label: 13C(6)15N(2)(K) @ 7                                                                                  | cleaved P-Y @ N-term            | 0.00073716  | 938.500061  | 470.2573 | 938.499329 | 470.256928 | 2 | 9  | 15.0782 | 15.28 |
| 4 | 58.79 | 60.84 | 74.2 TCP10_FlexII | 99.0 YPTFLYK                          | Label: 13C(6)15N(2)(K) @ 7                                                                                  | cleaved P-Y @ N-term            | 0.00092027  | 938.500244  | 470.2574 | 938.499329 | 470.256928 | 2 | 9  | 14.8156 | 15.28 |
| 5 | 57.74 | 59.78 | 79.0 CCND1_FlexII | 99.0 AAEVEEEVEEVLACTPTDVR             | Propionamide(C) @ 16; Label: 13C(6)15N(4)(R) @ 22                                                           |                                 | -0.00725437 | 2573.07666  | 858.6995 | 2573.08374 | 858.701904 | 3 | 18 | 16.1717 | 30.90 |
| 5 | 57.74 | 59.78 | 79.0 CCND1_FlexII | 99.0 ACQEIEALLESCLR                   | Propionamide(C) @ 2                                                                                         |                                 | -0.0130839  | 1759.8645   | 880.9395 | 1759.87744 | 880.945984 | 2 | 18 | 16.7215 | 30.90 |
| 5 | 57.74 | 59.78 | 79.0 CCND1_FlexII | 99.0 AEETCAPSVSYFK                    | Propionamide(C) @ 5; Label: 13C(6)15N(2)(K) @ 13                                                            |                                 | -0.00582051 | 1509.68433  | 755.8494 | 1509.69006 | 755.852295 | 2 | 15 | 14.2926 | 30.90 |
| 5 | 57.74 | 59.78 | 79.0 CCND1_FlexII | 99.0 AMLKAETCAPSVSYFK                 | Label: 13C(6)15N(2)(K) @ 4; Propionamide(C) @ 9; Label: 13C(6)15N(2)(K) @ 17                                | missed K-A @ 4                  | -0.00456055 | 1960.95642  | 654.6594 | 1960.96094 | 654.660889 | 3 | 13 | 24.5614 | 30.90 |
| 5 | 57.74 | 59.78 | 79.0 CCND1_FlexII | 99.0 AYPDANLLNDR                      | Label: 13C(6)15N(4)(R) @ 11                                                                                 |                                 | -0.00225476 | 1270.61585  | 636.3152 | 1270.61816 | 636.316345 | 2 | 8  | 26.0782 | 30.90 |
| 5 | 57.74 | 59.78 | 79.0 CCND1_FlexII | 99.0 CEEEVFPLAMNYLDR                  | Propionamide(C) @ 1; Label: 13C(6)15N(4)(R) @ 15                                                            |                                 | -0.00207518 | 1908.8606   | 637.2941 | 1908.86255 | 637.2948   | 3 | 14 | 17.03   | 30.90 |
| 5 | 57.74 | 59.78 | 79.0 CCND1_FlexII | 99.0 CVQKEVLPMSR                      | Propionamide(C) @ 1; Label: 13C(6)15N(2)(K) @ 4; Label: 13C(6)15N(4)(R) @ 11                                | missed K-E @ 4                  | 0.00150187  | 1377.72424  | 460.2487 | 1377.72278 | 460.2482   | 3 | 14 | 12.9487 | 30.90 |
| 5 | 57.74 | 59.78 | 79.0 CCND1_FlexII | 99.0 CVQKEVLPMSRK                     | Propionamide(C) @ 1; Label: 13C(6)15N(2)(K) @ 4; Label: 13C(6)15N(4)(R) @ 11; Label: 13C(6)15N(2)(K) @ 12   | missed K-E @ 4; missed R-K @ 11 | -0.00761717 | 1513.824218 | 757.9194 | 1513.83191 | 757.923218 | 2 | 12 | 12.2719 | 30.90 |
| 5 | 57.74 | 59.78 | 79.0 CCND1_FlexII | 99.0 EVLPSMRK                         | Label: 13C(6)15N(4)(R) @ 7; Label: 13C(6)15N(2)(K) @ 8                                                      | missed R-K @ 7                  | -0.00039197 | 976.549072  | 489.2818 | 976.549439 | 489.280213 | 2 | 8  | 12.3326 | 30.90 |
| 5 | 57.74 | 59.78 | 79.0 CCND1_FlexII | 99.0 FISNPPSMVAAGSVAAVQGLNLR          |                                                                                                             |                                 | -0.00741948 | 2397.27637  | 800.0994 | 2397.28394 | 800.101868 | 3 | 20 | 17.627  | 30.90 |
| 5 | 57.74 | 59.78 | 79.0 CCND1_FlexII | 99.0 FLSLEPVKK                        | Label: 13C(6)15N(2)(K) @ 8; Label: 13C(6)15N(2)(K) @ 9                                                      | missed K-K @ 8                  | -0.0013598  | 1075.66003  | 359.5606 | 1075.66126 | 359.561005 | 3 | 11 | 12.606  | 30.90 |
| 5 | 57.74 | 59.78 | 79.0 CCND1_FlexII | 99.0 HAQTFVALCATDVK                   | Propionamide(C) @ 9; Label: 13C(6)15N(2)(K) @ 14                                                            |                                 | -0.00218183 | 1581.80432  | 791.9094 | 1581.80652 | 791.910523 | 2 | 25 | 14.0057 | 30.90 |
| 5 | 57.74 | 59.78 | 79.0 CCND1_FlexII | 99.0 IVATWMLEVCVEEOK                  | Propionamide(C) @ 10; Label: 13C(6)15N(2)(K) @ 14                                                           |                                 | 0.00243687  | 1756.8645   | 879.4395 | 1756.86194 | 879.438232 | 2 | 14 | 16.8389 | 30.90 |
| 5 | 57.74 | 59.78 | 79.0 CCND1_FlexII | 99.0 IVATWMLEVCVEEOKCEEVFLAMNYLDR     | Propionamide(C) @ 10; Label: 13C(6)15N(2)(K) @ 14; Propionamide(C) @ 15; Label: 13C(6)15N(4)(R) @ 29        | missed K-C @ 14                 | 0.00644023  | 3647.71997  | 1216.914 | 3647.71387 | 1216.91187 | 3 |    |         |       |

|   |       |       |      |               |      |                          |                                                                                                |                             |             |            |          |            |            |   |    |         |       |
|---|-------|-------|------|---------------|------|--------------------------|------------------------------------------------------------------------------------------------|-----------------------------|-------------|------------|----------|------------|------------|---|----|---------|-------|
| 5 | 57.74 | 59.78 | 79.0 | CCND1_FlexIII | 99.0 | RAYPDANLLNDR             | Label:13C(6)15N(4)(R)@1; Label:13C(6)15N(4)(R)@12                                              | missed R-A@1                | -0.0032115  | 1436.72424 | 719.3694 | 1436.72754 | 719.371033 | 2 | 19 | 13.4514 | 30.90 |
| 5 | 57.74 | 59.78 | 79.0 | CCND1_FlexIII | 99.0 | SPNFIYSYR                | Label:13C(6)15N(4)(R)@10                                                                       |                             | -0.00150156 | 1269.60022 | 635.8074 | 1269.60181 | 635.808167 | 2 | 13 | 15.0742 | 30.90 |
| 5 | 57.74 | 59.78 | 79.0 | CCND1_FlexIII | 99.0 | SRLQLLGATCMFVASK         | Label:13C(6)15N(4)(R)@2; Propionamide(C)@10; Label:13C(6)15N(2)(K)@16                          | missed R-L@2                | -0.00444553 | 1812.96643 | 605.3294 | 1812.97095 | 605.330933 | 3 | 16 | 15.9488 | 30.90 |
| 5 | 57.74 | 59.78 | 79.0 | CCND1_FlexIII | 99.0 | WNLAAMTPHDFIEHFLSK       | Label:13C(6)15N(2)(K)@18                                                                       |                             | 0.0123186   | 2164.07788 | 722.3666 | 2164.06543 | 722.362427 | 3 | 12 | 17.9416 | 30.90 |
| 5 | 57.74 | 59.78 | 79.0 | CCND1_FlexIII | 99.0 | AAEEEEEEEEVDLACTPTDVR    | Propionamide(C)@16; Label:13C(6)15N(4)(R)@22                                                   |                             | 0.00208401  | 2573.08594 | 858.7026 | 2573.08374 | 858.701904 | 3 | 22 | 14.2031 | 30.90 |
| 5 | 57.74 | 59.78 | 79.0 | CCND1_FlexIII | 99.0 | AAEEEEEEEEVDLACTPTDVR    | Propionamide(C)@16; Label:13C(6)15N(4)(R)@22                                                   |                             | 0.00173437  | 2573.08545 | 1287.55  | 2573.08374 | 1287.54919 | 2 | 28 | 14.2054 | 30.90 |
| 5 | 57.74 | 59.78 | 79.0 | CCND1_FlexIII | 99.0 | AAEEEEEEEEVDLACTPTDVR    | Propionamide(C)@16; Label:13C(6)15N(4)(R)@22                                                   |                             | -0.00725437 | 2573.07666 | 858.6995 | 2573.08374 | 858.701904 | 3 | 17 | 14.7428 | 30.90 |
| 5 | 57.74 | 59.78 | 79.0 | CCND1_FlexIII | 99.0 | AAEEEEEEEEVDLACTPTDVR    | Propionamide(C)@16; Label:13C(6)15N(4)(R)@22                                                   |                             | -0.00725437 | 2573.07666 | 858.6995 | 2573.08374 | 858.701904 | 3 | 21 | 15.5956 | 30.90 |
| 5 | 57.74 | 59.78 | 79.0 | CCND1_FlexIII | 99.0 | AAEEEEEEEEVDLACTPTDVR    | Propionamide(C)@16; Label:13C(6)15N(4)(R)@22                                                   |                             | -0.00725437 | 2573.07666 | 858.6995 | 2573.08374 | 858.701904 | 3 | 15 | 18.5148 | 30.90 |
| 5 | 57.74 | 59.78 | 79.0 | CCND1_FlexIII | 99.0 | AAEEEEEEEEVDLACTPTDVR    | Propionamide(C)@16; Label:13C(6)15N(4)(R)@22                                                   |                             | 0.00075781  | 2573.08545 | 1287.55  | 2573.08374 | 1287.54919 | 2 | 6  | 19.0281 | 30.90 |
| 5 | 57.74 | 59.78 | 79.0 | CCND1_FlexIII | 99.0 | AAEEEEEEEEVDLACTPTDVR    | Propionamide(C)@16; Label:13C(6)15N(4)(R)@22                                                   |                             | -0.00725437 | 2573.07666 | 858.6995 | 2573.08374 | 858.701904 | 3 | 6  | 25.2152 | 30.90 |
| 5 | 57.74 | 59.78 | 79.0 | CCND1_FlexIII | 99.0 | ACQEQIEALLESSLR          | Propionamide(C)@2; Label:13C(6)15N(4)(R)@15                                                    |                             | 0.00060475  | 1769.88648 | 590.9694 | 1769.88574 | 590.969177 | 3 | 18 | 16.6291 | 30.90 |
| 5 | 57.74 | 59.78 | 79.0 | CCND1_FlexIII | 99.0 | ACQEQIEALLESSLR          | Propionamide(C)@2; Label:13C(6)15N(4)(R)@15                                                    |                             | -0.00059938 | 1769.88513 | 885.9498 | 1769.88574 | 885.950134 | 2 | 20 | 16.6563 | 30.90 |
| 5 | 57.74 | 59.78 | 79.0 | CCND1_FlexIII | 99.0 | ACQEQIEALLESSLR          | Propionamide(C)@2                                                                              |                             | -0.00241936 | 1759.87512 | 587.6323 | 1759.87744 | 587.633118 | 3 | 18 | 16.7325 | 30.90 |
| 5 | 57.74 | 59.78 | 79.0 | CCND1_FlexIII | 99.0 | ACQEQIEALLESSLR          | Propionamide(C)@2; Label:13C(6)15N(4)(R)@15                                                    |                             | -0.00012767 | 1769.8855  | 590.9691 | 1769.88574 | 590.969177 | 3 | 19 | 16.8889 | 30.90 |
| 5 | 57.74 | 59.78 | 79.0 | CCND1_FlexIII | 99.0 | ACQEQIEALLESSLR          | Propionamide(C)@2; Label:13C(6)15N(4)(R)@15                                                    |                             | 0.00123167  | 1769.88684 | 885.9507 | 1769.88574 | 885.950134 | 2 | 21 | 16.9394 | 30.90 |
| 5 | 57.74 | 59.78 | 79.0 | CCND1_FlexIII | 99.0 | ACQEQIEALLESSLR          | Propionamide(C)@2; Label:13C(6)15N(4)(R)@15                                                    |                             | 0.00060475  | 1769.88648 | 590.9694 | 1769.88574 | 590.969177 | 3 | 18 | 17.161  | 30.90 |
| 5 | 57.74 | 59.78 | 79.0 | CCND1_FlexIII | 99.0 | ACQEQIEALLESSLR          | Propionamide(C)@2; Label:13C(6)15N(4)(R)@15                                                    |                             | -0.00059938 | 1769.88513 | 885.9498 | 1769.88574 | 885.950134 | 2 | 20 | 17.2112 | 30.90 |
| 5 | 57.74 | 59.78 | 79.0 | CCND1_FlexIII | 99.0 | ACQEQIEALLESSLR          | Propionamide(C)@2; Label:13C(6)15N(4)(R)@15                                                    |                             | -0.0013318  | 1769.88452 | 885.9495 | 1769.88574 | 885.950134 | 2 | 17 | 17.4857 | 30.90 |
| 5 | 57.74 | 59.78 | 79.0 | CCND1_FlexIII | 99.0 | ACQEQIEALLESSLR          | Propionamide(C)@2; Deamidated(Q)@5; Label:13C(6)15N(4)(R)@15                                   |                             | 0.00664059  | 1770.87634 | 591.2994 | 1770.86975 | 591.29718  | 3 | 12 | 24.4376 | 30.90 |
| 5 | 57.74 | 59.78 | 79.0 | CCND1_FlexIII | 99.0 | AETECAPSVSYFK            | Propionamide(C)@5; Label:13C(6)15N(2)(K)@13                                                    |                             | -0.00582051 | 1509.68433 | 755.8494 | 1509.69066 | 755.852295 | 2 | 15 | 14.0295 | 30.90 |
| 5 | 57.74 | 59.78 | 79.0 | CCND1_FlexIII | 99.0 | AETECAPSVSYFK            | Propionamide(C)@5; Label:13C(6)15N(2)(K)@13                                                    |                             | -0.00125944 | 1509.68884 | 504.2369 | 1509.69006 | 504.237305 | 3 | 11 | 13.4217 | 30.90 |
| 5 | 57.74 | 59.78 | 79.0 | CCND1_FlexIII | 99.0 | AMLKAETECAPSVSYFK        | Label:13C(6)15N(2)(K)@4; Propionamide(C)@9; Label:13C(6)15N(2)(K)@17                           | missed K-A@4                | -0.00456055 | 1960.95642 | 654.6594 | 1960.96094 | 654.660889 | 3 | 12 | 13.7311 | 30.90 |
| 5 | 57.74 | 59.78 | 79.0 | CCND1_FlexIII | 99.0 | AMLKAETECAPSVSYFK        | Label:13C(6)15N(2)(K)@4; Propionamide(C)@9; Label:13C(6)15N(2)(K)@17                           | missed K-A@4                | -0.00228568 | 1960.95862 | 981.4866 | 1960.96094 | 981.487732 | 2 | 27 | 14.1602 | 30.90 |
| 5 | 57.74 | 59.78 | 79.0 | CCND1_FlexIII | 99.0 | AMLKAETECAPSVSYFK        | Label:13C(6)15N(2)(K)@4; Propionamide(C)@9; Label:13C(6)15N(2)(K)@17                           | missed K-A@4                | -0.00181397 | 1960.95898 | 654.6603 | 1960.96094 | 654.660889 | 3 | 18 | 14.4008 | 30.90 |
| 5 | 57.74 | 59.78 | 79.0 | CCND1_FlexIII | 99.0 | AMLKAETECAPSVSYFK        | Label:13C(6)15N(2)(K)@4; Propionamide(C)@9; Label:13C(6)15N(2)(K)@17                           | missed K-A@4                | -8.84E-05   | 1960.96082 | 981.4877 | 1960.96094 | 981.487732 | 2 | 26 | 14.4262 | 30.90 |
| 5 | 57.74 | 59.78 | 79.0 | CCND1_FlexIII | 99.0 | AYPDANLLNDR              | Label:13C(6)15N(4)(R)@11                                                                       |                             | 0.0061681   | 1270.62427 | 636.3194 | 1270.61816 | 636.316345 | 2 | 12 | 14.1498 | 30.90 |
| 5 | 57.74 | 59.78 | 79.0 | CCND1_FlexIII | 99.0 | AYPDANLLNDR              | Label:13C(6)15N(4)(R)@11                                                                       |                             | 0.0061681   | 1270.62427 | 636.3194 | 1270.61816 | 636.316345 | 2 | 7  | 25.808  | 30.90 |
| 5 | 57.74 | 59.78 | 79.0 | CCND1_FlexIII | 99.0 | AYPDANLLNDR              | Label:13C(6)15N(4)(R)@11                                                                       |                             | 0.0061681   | 1270.62427 | 636.3194 | 1270.61816 | 636.316345 | 2 | 8  | 25.555  | 30.90 |
| 5 | 57.74 | 59.78 | 79.0 | CCND1_FlexIII | 99.0 | AYPDANLLNDR              | Label:13C(6)15N(4)(R)@11                                                                       |                             | 0.0061681   | 1270.62427 | 636.3194 | 1270.61816 | 636.316345 | 2 | 8  | 25.1754 | 30.90 |
| 5 | 57.74 | 59.78 | 79.0 | CCND1_FlexIII | 99.0 | AYPDANLLNDR              |                                                                                                |                             | -0.00558405 | 1260.60425 | 631.3094 | 1260.60986 | 631.312195 | 2 | 10 | 14.2186 | 30.90 |
| 5 | 57.74 | 59.78 | 79.0 | CCND1_FlexIII | 99.0 | AYPDANLLNDR              | Label:13C(6)15N(4)(R)@11                                                                       |                             | -0.00286511 | 1270.61523 | 636.3149 | 1270.61816 | 636.316345 | 2 | 8  | 24.8939 | 30.90 |
| 5 | 57.74 | 59.78 | 79.0 | CCND1_FlexIII | 99.0 | CEEEVFPLAMNYLDR          | Propionamide(C)@1; Label:13C(6)15N(4)(R)@15                                                    |                             | 0.0003828   | 1908.86292 | 955.4387 | 1908.86255 | 955.438538 | 2 | 18 | 16.8412 | 30.90 |
| 5 | 57.74 | 59.78 | 79.0 | CCND1_FlexIII | 99.0 | CEEEVFPLAMNYLDR          | Propionamide(C)@1; Label:13C(6)15N(4)(R)@15                                                    |                             | -0.00095998 | 1908.86145 | 955.438  | 1908.86255 | 955.438538 | 2 | 16 | 17.103  | 30.90 |
| 5 | 57.74 | 59.78 | 79.0 | CCND1_FlexIII | 99.0 | CVQKEVLPMSMR             | Propionamide(C)@1; Label:13C(6)15N(2)(K)@4; Label:13C(6)15N(4)(R)@11                           | missed K-E@4                | 0.00154896  | 1377.72424 | 689.8694 | 1377.72278 | 689.868652 | 2 | 16 | 12.9688 | 30.90 |
| 5 | 57.74 | 59.78 | 79.0 | CCND1_FlexIII | 99.0 | CVQKEVLPMSMR             | Propionamide(C)@1; Label:13C(6)15N(2)(K)@4; Label:13C(6)15N(4)(R)@11                           | missed K-E@4                | 0.00081654  | 1377.72363 | 689.8691 | 1377.72278 | 689.868652 | 2 | 11 | 13.2467 | 30.90 |
| 5 | 57.74 | 59.78 | 79.0 | CCND1_FlexIII | 99.0 | CVQKEVLPMSMRK            | Propionamide(C)@1; Label:13C(6)15N(2)(K)@4; Label:13C(6)15N(4)(R)@11; Label:13C(6)15N(2)(K)@12 | missed K-E@4; missed R-K@11 | 0.00445122  | 1513.8363  | 505.6194 | 1513.83191 | 505.61792  | 3 | 12 | 12.2053 | 30.90 |
| 5 | 57.74 | 59.78 | 79.0 | CCND1_FlexIII | 99.0 | CVQKEVLPMSMRK            | Propionamide(C)@1; Label:13C(6)15N(2)(K)@4; Label:13C(6)15N(4)(R)@11; Label:13C(6)15N(2)(K)@12 | missed K-E@4; missed R-K@11 | 0.0165196   | 1513.84851 | 379.4684 | 1513.83191 | 379.465241 | 4 | 10 | 12.2272 | 30.90 |
| 5 | 57.74 | 59.78 | 79.0 | CCND1_FlexIII | 99.0 | FISNPPSMVAAGSVVAAVQGLNLR | Deamidated(N)@4; Oxidation(M)@8; Label:13C(6)15N(4)(R)@24                                      |                             | 0.00538546  | 2424.27637 | 809.0994 | 2424.271   | 809.097656 | 3 | 18 | 16.7147 | 30.90 |
| 5 | 57.74 | 59.78 | 79.0 | CCND1_FlexIII | 99.0 | FISNPPSMVAAGSVVAAVQGLNLR | Deamidated(N)@4; Oxidation(M)@8; Label:13C(6)15N(4)(R)@24                                      |                             | 0.0334782   | 2424.30542 | 1213.16  | 2424.271   | 1213.14282 | 2 | 16 | 16.7302 | 30.90 |
| 5 | 57.74 | 59.78 | 79.0 | CCND1_FlexIII | 99.0 | FISNPPSMVAAGSVVAAVQGLNLR | Deamidated(N)@4; Label:13C(6)15N(4)(R)@24                                                      |                             | 0.0263904   | 2408.30542 | 1205.16  | 2408.27612 | 1205.14539 | 2 | 18 | 17.4747 | 30.90 |
| 5 | 57.74 | 59.78 | 79.0 | CCND1_FlexIII | 99.0 | FISNPPSMVAAGSVVAAVQGLNLR | Deamidated(N)@4; Label:13C(6)15N(4)(R)@24                                                      |                             | 0.0104295   | 2408.28662 | 803.7695 | 2408.27612 | 803.765991 | 3 | 17 | 17.5133 | 30.90 |
| 5 | 57.74 | 59.78 | 79.0 | CCND1_FlexIII | 99.0 | FISNPPSMVAAGSVVAAVQGLNLR | Label:13C(6)15N(4)(R)@24                                                                       |                             | 0.00825548  | 2407.29932 | 1204.657 | 2407.29224 | 1204.65332 | 2 | 31 | 17.7518 | 30.90 |
| 5 | 57.74 | 59.78 | 79.0 | CCND1_FlexIII | 99.0 | FISNPPSMVAAGSVVAAVQGLNLR | Label:13C(6)15N(4)(R)@24                                                                       |                             | 0.00897133  | 2407.30103 | 803.441  | 2407.29224 | 803.437988 | 3 | 26 | 17.7797 | 30.90 |
| 5 | 57.74 | 59.78 | 79.0 | CCND1_FlexIII | 99.0 | FISNPPSMVAAGSVVAAVQGLNLR | Label:13C(6)15N(4)(R)@24                                                                       |                             | 0.00164711  | 2407.2937  | 803.4385 | 2407.29224 | 803.437988 | 3 | 24 | 18.0507 | 30.90 |
| 5 | 57.74 | 59.78 | 79.0 | CCND1_FlexIII | 99.0 | FISNPPSMVAAGSVVAAVQGLNLR | Deamidated(N)@4; Label:13C(6)15N(4)(R)@24                                                      |                             | 0.0104295   | 2408.28662 | 803.7695 | 2408.27612 | 803.765991 | 3 | 15 | 18.3171 | 30.90 |
| 5 | 57.74 | 59.78 | 79.0 | CCND1_FlexIII | 99.0 | FISNPPSMVAAGSVVAAVQGLNLR | Label:13C(6)15N(4)(R)@24                                                                       |                             | 0.0043937   | 2407.29663 | 803.4395 | 2407.29224 | 803.437988 | 3 | 17 | 18.5909 | 30.90 |
| 5 | 57.74 | 59.78 | 79.0 | CCND1_FlexIII | 99.0 | FISNPPSMVAAGSVVAAVQGLNLR | Deamidated(N)@4; Label:13C(6)15N(4)(R)@24                                                      |                             | 0.0104295   | 2408.28662 | 803.7695 | 2408.27612 | 803.765991 | 3 | 9  | 24.7523 | 30.90 |
| 5 | 57.74 | 59.78 | 79.0 | CCND1_FlexIII | 99.0 | FISNPPSMVAAGSVVAAVQGLNLR | Deamidated(N)@4; Label:13C(6)15N(4)(R)@24                                                      |                             | 0.0104295   | 2408.28662 | 803.7695 | 2408.27612 | 803.765991 | 3 | 9  | 19.0224 | 30.90 |
| 5 | 57.74 | 59.78 | 79.0 | CCND1_FlexIII | 99.0 | FLSLEPVKK                | Label:13C(6)15N(2)(K)@8; Label:13C(6)15N(2)(K)@9                                               | missed K-K@8                | -0.00254998 | 1075.65881 | 359.5602 | 1075.66126 | 359.561005 | 3 | 9  | 14.1208 | 30.90 |
| 5 | 57.74 | 59.78 | 79.0 | CCND1_FlexIII | 99.0 | FLSLEPVKK                | Label:13C(6)15N(2)(K)@8; Label:13C(6)15N(2)(K)@9                                               | missed K-K@8                | -0.00493036 | 1075.65637 | 359.5594 | 1075.66126 | 359.561005 | 3 | 8  | 25.1265 | 30.90 |
| 5 | 57.74 | 59.78 | 79.0 | CCND1_FlexIII | 99.0 | FLSLEPVKK                | Label:13C(6)15N(2)(K)@8; Label:13C(6)15N(2)(K)@9                                               | missed K-K@8                | -0.00163446 | 1075.65967 | 359.5605 | 1075.66126 | 359.561005 | 3 | 9  | 13.8519 | 30.90 |
| 5 | 57.74 | 59.78 | 79.0 | CCND1_FlexIII | 99.0 | FLSLEPVKK                | Label:13C(6)15N(2)(K)@8; Label:13C(6)15N(2)(K)@9                                               | missed K-K@8                | 0.00308182  | 1075.66431 | 538.8394 | 1075.66126 | 538.837891 | 2 | 10 | 13.8723 | 30.90 |
| 5 | 57.74 | 59.78 | 79.0 | CCND1_FlexIII | 99.0 | FLSLEPVKK                | Label:13C(6)15N(2)(K)@8; Label:13C(6)15N(2)(K)@9                                               | missed K-K@8                | -0.00282464 | 1075.65845 | 359.5601 | 1075.66126 | 359.561005 | 3 | 9  | 14.3906 | 30.90 |
| 5 | 57.74 | 59.78 | 79.0 | CCND1_FlexIII | 99.0 | FLSLEPVKK                | Label:13C(6)15N(2)(K)@8; Label:13C(6)15N(2)(K)@9                                               | missed K-K@8                | -0.00058029 | 1075.66065 | 538.8376 | 1075.66126 | 538.837891 | 2 | 10 | 14.1451 | 30.90 |
| 5 | 57.74 | 59.78 | 79.0 | CCND1_FlexIII | 99.0 | FLSLEPVKK                | Label:13C(6)15N(2)(K)@8; Label:13C(6)15N(2)(K)@9                                               | missed K-K@8                | -0.00155685 | 107        |          |            |            |   |    |         |       |

|   |       |       |      |                |      |                                  |                                                                                                                           |                               |             |            |            |            |            |    |         |         |       |
|---|-------|-------|------|----------------|------|----------------------------------|---------------------------------------------------------------------------------------------------------------------------|-------------------------------|-------------|------------|------------|------------|------------|----|---------|---------|-------|
| 5 | 57.74 | 59.78 | 79.0 | CCND1_FlexIII  | 99.0 | LQLLGATCMFVASK                   | Propionamide(C) @8; Label: 13C(6)15N(2)(K) @14                                                                            | -0.0039885                    | 1559.82544  | 780.92     | 1559.82947 | 780.922058 | 2          | 15 | 16.5724 | 30.90   |       |
| 5 | 57.74 | 59.78 | 79.0 | CCND1_FlexIII  | 99.0 | LQLLGATCMFVASK                   | Propionamide(C) @8; Label: 13C(6)15N(2)(K) @14                                                                            | -0.00020432                   | 1559.82922  | 780.9219   | 1559.82947 | 780.922058 | 2          | 13 | 16.8344 | 30.90   |       |
| 5 | 57.74 | 59.78 | 79.0 | CCND1_FlexIII  | 99.0 | LQLLGATCMFVASK                   | Propionamide(C) @8; Label: 13C(6)15N(2)(K) @14                                                                            | 0.00760818                    | 1559.83704  | 780.9258   | 1559.82947 | 780.922058 | 2          | 12 | 17.3772 | 30.90   |       |
| 5 | 57.74 | 59.78 | 79.0 | CCND1_FlexIII  | 99.0 | MEHQLCCVEVETR                    | Propionamide(C) @7; Propionamide(C) @8; Label: 13C(6)15N(4)(R) @14                                                        | 0.00980741                    | 1854.87634  | 619.2994   | 1854.86658 | 619.296143 | 3          | 15 | 14.3267 | 30.90   |       |
| 5 | 57.74 | 59.78 | 79.0 | CCND1_FlexIII  | 99.0 | MEHQLCCVEVETR                    | Propionamide(C) @7; Propionamide(C) @8; Label: 13C(6)15N(4)(R) @14                                                        | 0.0013401                     | 1854.86792  | 928.4412   | 1854.86658 | 928.440552 | 2          | 13 | 14.4174 | 30.90   |       |
| 5 | 57.74 | 59.78 | 79.0 | CCND1_FlexIII  | 99.0 | MKETIPLTAEK                      | Oxidation(M) @1; Label: 13C(6)15N(2)(K) @2; Label: 13C(6)15N(2)(K) @11                                                    | 0.00142417                    | 1291.70422  | 646.8594   | 1291.70268 | 646.858704 | 2          | 14 | 12.5832 | 30.90   |       |
| 5 | 57.74 | 59.78 | 79.0 | CCND1_FlexIII  | 99.0 | MKETIPLTAEK                      | Label: 13C(6)15N(2)(K) @2; Label: 13C(6)15N(2)(K) @11                                                                     | missed K-E @2                 | -0.0036636  | 1275.70422 | 638.8594   | 1275.70789 | 638.861267 | 2  | 18      | 12.9449 | 30.90 |
| 5 | 57.74 | 59.78 | 79.0 | CCND1_FlexIII  | 99.0 | MKETIPLTAEK                      | Label: 13C(6)15N(2)(K) @2; Label: 13C(6)15N(2)(K) @11                                                                     | missed K-E @2                 | 0.00101954  | 1275.70898 | 426.2436   | 1275.70789 | 426.243256 | 3  | 11      | 12.9631 | 30.90 |
| 5 | 57.74 | 59.78 | 79.0 | CCND1_FlexIII  | 99.0 | MKETIPLTAEK                      | Oxidation(M) @1; Label: 13C(6)15N(2)(K) @2; Label: 13C(6)15N(2)(K) @11                                                    | -0.00419107                   | 1291.69873  | 646.8566   | 1291.70268 | 646.858704 | 2          | 13 | 13.0594 | 30.90   |       |
| 5 | 57.74 | 59.78 | 79.0 | CCND1_FlexIII  | 99.0 | MKETIPLTAEK                      | Label: 13C(6)15N(2)(K) @2; Label: 13C(6)15N(2)(K) @11                                                                     | -0.0004453                    | 1275.70752  | 426.2431   | 1275.70789 | 426.243256 | 3          | 11 | 13.2196 | 30.90   |       |
| 5 | 57.74 | 59.78 | 79.0 | CCND1_FlexIII  | 99.0 | MKETIPLTAEK                      | Label: 13C(6)15N(2)(K) @2; Label: 13C(6)15N(2)(K) @11                                                                     | -0.00085598                   | 1275.70703  | 638.8608   | 1275.70789 | 638.861267 | 2          | 11 | 13.2209 | 30.90   |       |
| 5 | 57.74 | 59.78 | 79.0 | CCND1_FlexIII  | 99.0 | MKETIPLTAEK                      | Label: 13C(6)15N(2)(K) @2; Label: 13C(6)15N(2)(K) @11                                                                     | missed K-E @2                 | -0.00081152 | 1275.70715 | 426.243    | 1275.70789 | 426.243256 | 3  | 9       | 12.0386 | 30.90 |
| 5 | 57.74 | 59.78 | 79.0 | CCND1_FlexIII  | 99.0 | MKETIPLTAEK                      | Oxidation(M) @1; Label: 13C(6)15N(2)(K) @2; Label: 13C(6)15N(2)(K) @11                                                    | missed K-E @2                 | 0.00146863  | 1291.70435 | 431.5754   | 1291.70288 | 431.57489  | 3  | 9       | 12.6072 | 30.90 |
| 5 | 57.74 | 59.78 | 79.0 | CCND1_FlexIII  | 99.0 | MPEAEENKQIR                      | Label: 13C(6)15N(2)(K) @8; Label: 13C(6)15N(4)(R) @12                                                                     | -0.0105258                    | 1474.74634  | 492.5894   | 1474.75684 | 492.592896 | 3          | 11 | 12.2744 | 30.90   |       |
| 5 | 57.74 | 59.78 | 79.0 | CCND1_FlexIII  | 99.0 | MPEAEENKQIRK                     | Label: 13C(6)15N(2)(K) @8; Label: 13C(6)15N(4)(R) @12; Label: 13C(6)15N(2)(K) @13                                         | -0.0176028                    | 1610.84851  | 403.7194   | 1610.86609 | 403.723785 | 4          | 10 | 11.5635 | 30.90   |       |
| 5 | 57.74 | 59.78 | 79.0 | CCND1_FlexIII  | 99.0 | QAQQNMDPK                        | Label: 13C(6)15N(2)(K) @9                                                                                                 | -8.29E-05                     | 1066.49573  | 534.2551   | 1066.49573 | 534.255127 | 2          | 9  | 8.7983  | 30.90   |       |
| 5 | 57.74 | 59.78 | 79.0 | CCND1_FlexIII  | 99.0 | RAYPDANLLNDR                     | Label: 13C(6)15N(4)(R) @1; Label: 13C(6)15N(4)(R) @12                                                                     | missed R-A @1                 | -0.00109184 | 1436.72644 | 479.9161   | 1436.72754 | 479.916443 | 3  | 12      | 13.4613 | 30.90 |
| 5 | 57.74 | 59.78 | 79.0 | CCND1_FlexIII  | 99.0 | RAYPDANLLNDR                     | Label: 13C(6)15N(4)(R) @1; Label: 13C(6)15N(4)(R) @12                                                                     | -0.0007701                    | 1436.72693  | 719.3707   | 1436.72754 | 719.371033 | 2          | 17 | 13.7185 | 30.90   |       |
| 5 | 57.74 | 59.78 | 79.0 | CCND1_FlexIII  | 99.0 | SRLLQLLGATCMFVASK                | Label: 13C(6)15N(4)(R) @2; Propionamide(C) @10; Label: 13C(6)15N(2)(K) @16                                                | -0.00096653                   | 1812.97009  | 605.3306   | 1812.97095 | 605.330933 | 3          | 18 | 16.365  | 30.90   |       |
| 5 | 57.74 | 59.78 | 79.0 | CCND1_FlexIII  | 99.0 | SRLLQLLGATCMFVASK                | Label: 13C(6)15N(4)(R) @2; Propionamide(C) @10; Label: 13C(6)15N(2)(K) @16                                                | -0.00444553                   | 1812.96643  | 605.3294   | 1812.97095 | 605.330933 | 3          | 21 | 16.6262 | 30.90   |       |
| 5 | 57.74 | 59.78 | 79.0 | CCND1_FlexIII  | 99.0 | SRLLQLLGATCMFVASK                | Label: 13C(6)15N(4)(R) @2; Propionamide(C) @10; Label: 13C(6)15N(2)(K) @16                                                | 0.00141385                    | 1812.97241  | 605.3314   | 1812.97095 | 605.330933 | 3          | 22 | 16.8927 | 30.90   |       |
| 5 | 57.74 | 59.78 | 79.0 | CCND1_FlexIII  | 99.0 | SRLLQLLGATCMFVASK                | Label: 13C(6)15N(4)(R) @2; Propionamide(C) @10; Label: 13C(6)15N(2)(K) @16                                                | -0.00444553                   | 1812.96643  | 605.3294   | 1812.97095 | 605.330933 | 3          | 17 | 17.1565 | 30.90   |       |
| 5 | 57.74 | 59.78 | 79.0 | CCND1_FlexIII  | 99.0 | SRLLQLLGATCMFVASK                | Label: 13C(6)15N(4)(R) @2; Propionamide(C) @10; Label: 13C(6)15N(2)(K) @16                                                | -0.00444553                   | 1812.96643  | 605.3294   | 1812.97095 | 605.330933 | 3          | 15 | 17.4656 | 30.90   |       |
| 5 | 57.74 | 59.78 | 79.0 | CCND1_FlexIII  | 99.0 | SRLLQLLGATCMFVASK                | Label: 13C(6)15N(4)(R) @2; Deamidated(Q) @4; Propionamide(C) @10; Label: 13C(6)15N(2)(K) @16                              | 0.0014072                     | 1813.95642  | 605.6594   | 1813.95496 | 605.658936 | 3          | 12 | 24.5547 | 30.90   |       |
| 5 | 57.74 | 59.78 | 79.0 | CCND1_FlexIII  | 99.0 | WNLAAMTPHDFIEHFLSK               | Label: 13C(6)15N(2)(K) @18                                                                                                | 0.0113865                     | 2164.0769   | 542.0265   | 2164.06543 | 542.023682 | 4          | 11 | 17.8906 | 30.90   |       |
| 5 | 57.74 | 59.78 | 79.0 | CCND1_FlexIII  | 99.0 | YPTFLYK                          | Label: 13C(6)15N(2)(K) @7                                                                                                 | 0.00057017                    | 938.499878  | 470.2572   | 938.499329 | 470.256928 | 2          | 9  | 15.0367 | 30.90   |       |
| 5 | 57.74 | 59.78 | 79.0 | CCND1_FlexIII  | 99.0 | YPTFLYK                          | Label: 13C(6)15N(2)(K) @7                                                                                                 | 0.00819955                    | 938.507446  | 470.261    | 938.499329 | 470.256928 | 2          | 9  | 14.7754 | 30.90   |       |
| 5 | 57.74 | 59.78 | 79.0 | CCND1_FlexIII  | 99.0 | YPTFLYK                          | Label: 13C(6)15N(2)(K) @7                                                                                                 | 0.00073716                    | 938.500061  | 470.2573   | 938.499329 | 470.256928 | 2          | 9  | 15.0782 | 30.90   |       |
| 5 | 57.74 | 59.78 | 79.0 | CCND1_FlexIII  | 99.0 | YPTFLYK                          | Label: 13C(6)15N(2)(K) @7                                                                                                 | 0.00092027                    | 938.500244  | 470.2574   | 938.499329 | 470.256928 | 2          | 9  | 14.8156 | 30.90   |       |
| 6 | 55.92 | 58    | 59.7 | MAPK10_FlexIII | 99.0 | APEVLGMGYK                       | Label: 13C(6)15N(2)(K) @11                                                                                                | 6.39E-05                      | 1184.63562  | 593.3251   | 1184.6355  | 593.325012 | 2          | 14 | 15.0286 | 7.35    |       |
| 6 | 55.92 | 58    | 59.7 | MAPK10_FlexIII | 99.0 | APEVLGMGYKENVDIWSVGCIMGEMVR      | Label: 13C(6)15N(2)(K) @11; Deamidated(N) @13; Propionamide(C) @21; Label: 13C(6)15N(4)(R) @28                            | missed K-E @11                | 0.0175823   | 3185.55518 | 1062.859   | 3185.53882 | 1062.85352 | 3  | 22      | 17.7929 | 7.35  |
| 6 | 55.92 | 58    | 59.7 | MAPK10_FlexIII | 99.0 | DLKPSNIVVK                       | Label: 13C(6)15N(2)(K) @3; Label: 13C(6)15N(2)(K) @10                                                                     | -0.00361061                   | 1127.68481  | 564.8497   | 1127.68848 | 564.851502 | 2          | 14 | 13.0238 | 7.35    |       |
| 6 | 55.92 | 58    | 59.7 | MAPK10_FlexIII | 99.0 | EHTIEEWKELIYK                    | Label: 13C(6)15N(2)(K) @8; Label: 13C(6)15N(2)(K) @13                                                                     | -0.00324916                   | 1732.89746  | 578.6398   | 1732.90064 | 578.640808 | 3          | 16 | 15.26   | 7.35    |       |
| 6 | 55.92 | 58    | 59.7 | MAPK10_FlexIII | 99.0 | EHTIEEWKELIYKVMNSEEK             | Label: 13C(6)15N(2)(K) @8; Label: 13C(6)15N(2)(K) @13; Label: 13C(6)15N(2)(K) @21                                         | -0.00461017                   | 2687.31665  | 896.7795   | 2687.32153 | 896.781128 | 3          | 21 | 16.3901 | 7.35    |       |
| 6 | 55.92 | 58    | 59.7 | MAPK10_FlexIII | 99.0 | ELIYKVMNSEEK                     | Label: 13C(6)15N(2)(K) @5; Label: 13C(6)15N(2)(K) @13                                                                     | missed K-E @5                 | -0.00011116 | 1626.81445 | 814.4145   | 1626.81458 | 814.414551 | 2  | 18      | 13.9798 | 7.35  |
| 6 | 55.92 | 58    | 59.7 | MAPK10_FlexIII | 99.0 | ENVDSVSGCIMGEMVR                 | Propionamide(C) @10; Label: 13C(6)15N(4)(R) @17                                                                           | -0.00558883                   | 2017.92346  | 1009.969   | 2017.92993 | 1009.97223 | 2          | 22 | 17.7562 | 7.35    |       |
| 6 | 55.92 | 58    | 59.7 | MAPK10_FlexIII | 99.0 | EVMNSEKTKNGVVK                   | Label: 13C(6)15N(2)(K) @8; Label: 13C(6)15N(2)(K) @10; Deamidated(N) @11; Label: 13C(6)15N(2)(K) @15                      | missed K-T @8; missed K-N @10 | 0.00199695  | 1715.88464 | 858.9496   | 1715.88257 | 858.948547 | 2  | 20      | 11.106  | 7.35  |
| 6 | 55.92 | 58    | 59.7 | MAPK10_FlexIII | 99.0 | HLHSAGIHR                        | Label: 13C(6)15N(4)(R) @10                                                                                                | 0.00094465                    | 1149.6405   | 384.2208   | 1149.63953 | 384.220429 | 3          | 12 | 10.9756 | 7.35    |       |
| 6 | 55.92 | 58    | 59.7 | MAPK10_FlexIII | 99.0 | ILDFGLAR                         | Label: 13C(6)15N(4)(R) @8                                                                                                 | -0.00180431                   | 913.524292  | 457.7694   | 913.526062 | 457.770325 | 2          | 10 | 17.2833 | 7.35    |       |
| 6 | 55.92 | 58    | 59.7 | MAPK10_FlexIII | 99.0 | ILFPGRDYDQWNK                    | Label: 13C(6)15N(4)(R) @6; Label: 13C(6)15N(2)(K) @14                                                                     | missed R-D @6                 | 0.0024966   | 1781.92444 | 891.9695   | 1781.922   | 891.968262 | 2  | 15      | 15.5565 | 7.35  |
| 6 | 55.92 | 58    | 59.7 | MAPK10_FlexIII | 99.0 | ILFPGRDYDQWNKVIQLGTPCPPEFMK      | Label: 13C(6)15N(4)(R) @6; Label: 13C(6)15N(2)(K) @14; Propionamide(C) @23; Label: 13C(6)15N(2)(K) @28                    | missed R-D @6; missed K-V @14 | 0.0349258   | 3433.77515 | 1145.599   | 3433.74121 | 1145.58777 | 3  | 14      | 17.7161 | 7.35  |
| 6 | 55.92 | 58    | 59.7 | MAPK10_FlexIII | 99.0 | ISVDDALQHPHYINWVYDPAEVEAPPPQIYDK | Label: 13C(6)15N(2)(K) @31                                                                                                | 0.00010126                    | 3589.75098  | 1197.591   | 3589.74976 | 1197.59045 | 3          | 23 | 16.3635 | 7.35    |       |
| 6 | 55.92 | 58    | 59.7 | MAPK10_FlexIII | 99.0 | LFPDSLFPADSEHNK                  | Label: 13C(6)15N(2)(K) @15                                                                                                | -0.00175063                   | 1723.82813  | 862.9213   | 1723.82971 | 862.922119 | 2          | 16 | 15.8989 | 7.35    |       |
| 6 | 55.92 | 58    | 59.7 | MAPK10_FlexIII | 99.0 | LFPDSLFPADSEHNKLLK               | Label: 13C(6)15N(2)(K) @15; Label: 13C(6)15N(2)(K) @17                                                                    | -0.00067767                   | 1973.02222  | 987.5184   | 1973.02295 | 987.518738 | 2          | 16 | 15.3162 | 7.35    |       |
| 6 | 55.92 | 58    | 59.7 | MAPK10_FlexIII | 99.0 | MLVIDPAK                         | Label: 13C(6)15N(2)(K) @8                                                                                                 | 0.00014656                    | 893.513672  | 447.7641   | 893.51355  | 447.764069 | 2          | 9  | 14.406  | 7.35    |       |
| 6 | 55.92 | 58    | 59.7 | MAPK10_FlexIII | 99.0 | MLVIDPAKR                        | Label: 13C(6)15N(2)(K) @8; Label: 13C(6)15N(4)(R) @9                                                                      | -0.00014752                   | 1059.62293  | 530.8187   | 1059.62293 | 530.818726 | 2          | 10 | 13.6453 | 7.35    |       |
| 6 | 55.92 | 58    | 59.7 | MAPK10_FlexIII | 99.0 | QLDEREHTIEEWK                    | Gln->pyro-Glu @N-term; Label: 13C(6)15N(4)(R) @5; Label: 13C(6)15N(2)(K) @13                                              | -0.0150698                    | 1712.79761  | 571.9398   | 1712.81225 | 571.944763 | 3          | 14 | 14.0054 | 7.35    |       |
| 6 | 55.92 | 58    | 59.7 | MAPK10_FlexIII | 99.0 | QLDEREHTIEEWKELIYK               | Gln->pyro-Glu @N-term; Label: 13C(6)15N(4)(R) @5; Label: 13C(6)15N(2)(K) @13; Label: 13C(6)15N(2)(K) @18                  | -0.00868449                   | 2367.18701  | 790.0696   | 2367.1958  | 790.07251  | 3          | 16 | 15.8345 | 7.35    |       |
| 6 | 55.92 | 58    | 59.7 | MAPK10_FlexIII | 99.0 | RISVDALQHPHYINWVYDPAEVEAPPPQIYDK | Label: 13C(6)15N(4)(R) @1; Deamidated(N) @14; Label: 13C(6)15N(2)(K) @32                                                  | 0.0031986                     | 3756.875    | 1253.299   | 3756.84302 | 1253.28833 | 3          | 15 | 16.0114 | 7.35    |       |
| 6 | 55.92 | 58    | 59.7 | MAPK10_FlexIII | 99.0 | TAGTSPFMMTPYVVTR                 | Label: 13C(6)15N(4)(R) @15                                                                                                | -0.00292907                   | 1670.80066  | 836.4076   | 1670.80359 | 836.409058 | 2          | 18 | 15.5735 | 7.35    |       |
| 6 | 55.92 | 58    | 59.7 | MAPK10_FlexIII | 99.0 | VIQLGTPCPPEFMK                   | Propionamide(C) @9; Label: 13C(6)15N(2)(K) @14                                                                            | -0.00032896                   | 1669.82971  | 835.9221   | 1669.82996 | 835.922241 | 2          | 17 | 15.0763 | 7.35    |       |
| 6 | 55.92 | 58    | 59.7 | MAPK10_FlexIII | 99.0 | YYRAPEVLGMGYKENVDIWSVGCIMGEMVR   | Label: 13C(6)15N(4)(R) @3; Label: 13C(6)15N(2)(K) @14; Deamidated(N) @16; Propionamide(C) @24; Label: 13C(6)15N(4)(R) @31 | -0.00161592                   | 3677.77344  | 920.4506   | 3677.7749  | 920.450989 | 4          | 14 | 17.5638 | 7.35    |       |
| 6 | 55.92 | 58    | 59.7 | MAPK10_FlexIII | 99.0 | VIQLGTPCPPEFMKK                  | Deamidated(Q) @4; Propionamide(C) @9; Label: 13C(6)15N(2)(K) @14; Label: 13C(6)15N(2)(K) @15                              | 0.0213962                     | 1806.94446  | 904.4795   | 1806.9231  | 904.468811 | 2          | 13 | 14.3233 | 7.35    |       |
| 6 | 55.92 | 58    | 59.7 | MAPK10_FlexIII | 99.0 | APEVLGMGYKENVDIWSVGCIMGEMVR      | Label: 13C(6)15N(2)(K) @11; Deamidated(N) @13; Propionamide(C) @21; Label: 13C(6)15N(4)(R) @28                            | missed K-K @14                | 0.0213476   | 3185.56104 | 1062.861   | 3185.53882 | 1062.85352 | 3  | 20      | 17.7515 | 7.35  |
| 6 | 55.92 | 58    | 59.7 | MAPK10_FlexIII | 99.0 | APEVLGMGYKENVDIWSVGCIMGEMVR      | Label: 13C(6)15N(2)(K) @11; Propionamide(C) @21; Label: 13C(6)15N(4)(R) @28                                               | missed K-E @11                |             |            |            |            |            |    |         |         |       |

|   |       |       |                     |                                      |                                                                                                      |                             |             |            |            |            |            |    |         |         |       |
|---|-------|-------|---------------------|--------------------------------------|------------------------------------------------------------------------------------------------------|-----------------------------|-------------|------------|------------|------------|------------|----|---------|---------|-------|
| 6 | 55.92 | 58    | 59.7 MAPK10_Flexill | 99.0 EHTIEEWKELIYKVMNSEEK            | Label: 13C(6)15N(2)(K)@8; Label: 13C(6)15N(2)(K)@13; Label: 13C(6)15N(2)(K)@21                       | missed K-E@8; missed K-E@13 | -0.00917922 | 2687.31226 | 538.4697   | 2687.32153 | 538.471558 | 5  | 15      | 16.3121 | 7.35  |
| 6 | 55.92 | 58    | 59.7 MAPK10_Flexill | 99.0 EHTIEEWKELIYKVMNSEEK            | Label: 13C(6)15N(2)(K)@8; Label: 13C(6)15N(2)(K)@13; Deamidated(N)@17; Label: 13C(6)15N(2)(K)@21     | missed K-E@8; missed K-E@13 | 0.00124179  | 2688.30664 | 897.1095   | 2688.30542 | 897.109131 | 3  | 14      | 16.284  | 7.35  |
| 6 | 55.92 | 58    | 59.7 MAPK10_Flexill | 99.0 ELIYKVMNSEEK                    | Label: 13C(6)15N(2)(K)@5; Label: 13C(6)15N(2)(K)@13                                                  | missed K-E@5                | 0.0029754   | 1626.81751 | 543.2798   | 1626.81458 | 543.278809 | 3  | 12      | 13.9444 | 7.35  |
| 6 | 55.92 | 58    | 59.7 MAPK10_Flexill | 99.0 ENVDIWSVGCIMGEMVR               | Propionamide(C)@10; Label: 13C(6)15N(4)(R)@17                                                        |                             | -0.00262433 | 2017.92737 | 673.6497   | 2017.92993 | 673.650574 | 3  | 20      | 17.7861 | 7.35  |
| 6 | 55.92 | 58    | 59.7 MAPK10_Flexill | 99.0 ENVDIWSVGCIMGEMVR               | Propionamide(C)@10; Label: 13C(6)15N(4)(R)@17                                                        |                             | -0.00095016 | 2017.92944 | 1009.972   | 2017.92993 | 1009.97223 | 2  | 19      | 18.0209 | 7.35  |
| 6 | 55.92 | 58    | 59.7 MAPK10_Flexill | 99.0 ENVDIWSVGCIMGEMVR               | Propionamide(C)@10; Label: 13C(6)15N(4)(R)@17                                                        |                             | -0.00322583 | 2017.92749 | 1009.971   | 2017.92993 | 1009.97223 | 2  | 21      | 17.7827 | 7.35  |
| 6 | 55.92 | 58    | 59.7 MAPK10_Flexill | 99.0 ENVDIWSVGCIMGEMVR               | Propionamide(C)@10; Label: 13C(6)15N(4)(R)@17                                                        |                             | -0.00558883 | 2017.92346 | 1009.969   | 2017.92993 | 1009.97223 | 2  | 13      | 24.4049 | 7.35  |
| 6 | 55.92 | 58    | 59.7 MAPK10_Flexill | 99.0 ILDFGLAR                        | Label: 13C(6)15N(4)(R)@8                                                                             |                             | -0.00058361 | 913.525452 | 457.77     | 913.526062 | 457.770325 | 2  | 6       | 28.5972 | 7.35  |
| 6 | 55.92 | 58    | 59.7 MAPK10_Flexill | 99.0 ILDFGLAR                        | Label: 13C(6)15N(4)(R)@8                                                                             |                             | -0.00076672 | 913.525269 | 457.7699   | 913.526062 | 457.770325 | 2  | 6       | 28.3393 | 7.35  |
| 6 | 55.92 | 58    | 59.7 MAPK10_Flexill | 99.0 ILDFGLAR                        | Label: 13C(6)15N(4)(R)@8                                                                             |                             | -0.00101086 | 913.525085 | 457.7698   | 913.526062 | 457.770325 | 2  | 8       | 24.2071 | 7.35  |
| 6 | 55.92 | 58    | 59.7 MAPK10_Flexill | 99.0 ILDFGLAR                        | Label: 13C(6)15N(4)(R)@8                                                                             |                             | -0.00101086 | 913.525085 | 457.7698   | 913.526062 | 457.770325 | 2  | 9       | 15.7037 | 7.35  |
| 6 | 55.92 | 58    | 59.7 MAPK10_Flexill | 99.0 ISVDDALQHPYINVVYDPAEVEAPPPQIYDK | Label: 13C(6)15N(2)(K)@31                                                                            |                             | 0.00119989  | 3589.75098 | 1197.591   | 3589.74976 | 1197.59045 | 3  | 23      | 16.6303 | 7.35  |
| 6 | 55.92 | 58    | 59.7 MAPK10_Flexill | 99.0 ISVDDALQHPYINVVYDPAEVEAPPPQIYDK | Deamidated(N)@13; Label: 13C(6)15N(2)(K)@31                                                          |                             | 0.00265732  | 3590.73511 | 1197.919   | 3590.73364 | 1197.91846 | 3  | 16      | 16.8915 | 7.35  |
| 6 | 55.92 | 58    | 59.7 MAPK10_Flexill | 99.0 ISVDDALQHPYINVVYDPAEVEAPPPQIYDK | Deamidated(N)@13; Label: 13C(6)15N(2)(K)@31                                                          |                             | 0.0354069   | 3590.76904 | 898.6995   | 3590.73364 | 898.690674 | 4  | 12      | 16.3936 | 7.35  |
| 6 | 55.92 | 58    | 59.7 MAPK10_Flexill | 99.0 LFPDSLFPADSEHNK                 | Label: 13C(6)15N(2)(K)@15                                                                            |                             | 0.00789292  | 1723.83765 | 862.9261   | 1723.82971 | 862.922119 | 2  | 15      | 15.3569 | 7.35  |
| 6 | 55.92 | 58    | 59.7 MAPK10_Flexill | 99.0 LFPDSLFPADSEHNK                 | Label: 13C(6)15N(2)(K)@15                                                                            |                             | 0.00105699  | 1723.83093 | 862.9227   | 1723.82971 | 862.922119 | 2  | 15      | 15.6266 | 7.35  |
| 6 | 55.92 | 58    | 59.7 MAPK10_Flexill | 99.0 LFPDSLFPADSEHNK                 | Label: 13C(6)15N(2)(K)@15                                                                            |                             | -0.00092237 | 1723.82886 | 575.6169   | 1723.82971 | 575.617188 | 3  | 13      | 15.5917 | 7.35  |
| 6 | 55.92 | 58    | 59.7 MAPK10_Flexill | 99.0 LFPDSLFPADSEHNK                 | Label: 13C(6)15N(2)(K)@15                                                                            |                             | -0.00092237 | 1723.82886 | 575.6169   | 1723.82971 | 575.617188 | 3  | 13      | 15.8525 | 7.35  |
| 6 | 55.92 | 58    | 59.7 MAPK10_Flexill | 99.0 LFPDSLFPADSEHNK                 | Label: 13C(6)15N(2)(K)@15                                                                            |                             | 0.00768359  | 1723.83765 | 575.6198   | 1723.82971 | 575.617188 | 3  | 13      | 15.3276 | 7.35  |
| 6 | 55.92 | 58    | 59.7 MAPK10_Flexill | 99.0 LFPDSLFPADSEHNK                 | Label: 13C(6)15N(2)(K)@15; Label: 13C(6)15N(2)(K)@17                                                 | missed K-L@15               | 0.00371686  | 1973.02673 | 987.5206   | 1973.02295 | 987.518738 | 2  | 17      | 15.0376 | 7.35  |
| 6 | 55.92 | 58    | 59.7 MAPK10_Flexill | 99.0 LFPDSLFPADSEHNK                 | Label: 13C(6)15N(2)(K)@15; Label: 13C(6)15N(2)(K)@17                                                 | missed K-L@15               | -0.00570878 | 1973.01721 | 658.6797   | 1973.02295 | 658.68158  | 3  | 14      | 15.2588 | 7.35  |
| 6 | 55.92 | 58    | 59.7 MAPK10_Flexill | 99.0 LFPDSLFPADSEHNK                 | Label: 13C(6)15N(2)(K)@15; Label: 13C(6)15N(2)(K)@17                                                 | missed K-L@15               | -0.00570878 | 1973.01721 | 658.6797   | 1973.02295 | 658.68158  | 3  | 14      | 14.9811 | 7.35  |
| 6 | 55.92 | 58    | 59.7 MAPK10_Flexill | 99.0 LFPDSLFPADSEHNK                 | Label: 13C(6)15N(2)(K)@15; Label: 13C(6)15N(2)(K)@17                                                 | missed K-L@15               | -0.0128151  | 1973.01013 | 494.2598   | 1973.02295 | 494.263001 | 4  | 13      | 14.9208 | 7.35  |
| 6 | 55.92 | 58    | 59.7 MAPK10_Flexill | 99.0 LFPDSLFPADSEHNK                 | Label: 13C(6)15N(2)(K)@15; Label: 13C(6)15N(2)(K)@17                                                 | missed K-L@15               | 2.30E-06    | 1973.02295 | 494.263    | 1973.02295 | 494.263001 | 4  | 12      | 15.1846 | 7.35  |
| 6 | 55.92 | 58    | 59.7 MAPK10_Flexill | 99.0 MLVIDPAKR                       | Label: 13C(6)15N(2)(K)@8; Label: 13C(6)15N(4)(R)@9                                                   | missed K-R@8                | -0.0151579  | 1059.60791 | 354.2099   | 1059.62293 | 354.214935 | 3  | 10      | 14.1597 | 7.35  |
| 6 | 55.92 | 58    | 59.7 MAPK10_Flexill | 99.0 MLVIDPAKR                       | Label: 13C(6)15N(2)(K)@8; Label: 13C(6)15N(4)(R)@9                                                   | missed K-R@8                | -0.00069254 | 1059.62219 | 354.2147   | 1059.62293 | 354.214935 | 3  | 9       | 13.6201 | 7.35  |
| 6 | 55.92 | 58    | 59.7 MAPK10_Flexill | 99.0 QLDERHTIEEWK                    | Gln->pyro-Glu@N-term; Label: 13C(6)15N(4)(R)@5; Label: 13C(6)15N(2)(K)@13                            | missed R-E@5                | -0.00796351 | 1712.80444 | 857.4095   | 1712.81215 | 857.413513 | 2  | 14      | 14.0287 | 7.35  |
| 6 | 55.92 | 58    | 59.7 MAPK10_Flexill | 99.0 QLDERHTIEEWKELIYK               | Gln->pyro-Glu@N-term; Label: 13C(6)15N(4)(R)@5; Label: 13C(6)15N(2)(K)@13; Label: 13C(6)15N(2)(K)@18 | missed R-E@5; missed K-E@13 | 0.0141164   | 2367.21021 | 592.8098   | 2367.1958  | 592.806213 | 4  | 16      | 15.8299 | 7.35  |
| 6 | 55.92 | 58    | 59.7 MAPK10_Flexill | 99.0 QLDERHTIEEWKELIYK               | Label: 13C(6)15N(4)(R)@5; Label: 13C(6)15N(2)(K)@13; Label: 13C(6)15N(2)(K)@18                       | missed R-E@5; missed K-E@13 | -0.00149203 | 2384.2207  | 795.7475   | 2384.22217 | 795.748047 | 3  | 15      | 15.2835 | 7.35  |
| 6 | 55.92 | 58    | 59.7 MAPK10_Flexill | 99.0 QLDERHTIEEWKELIYK               | Gln->pyro-Glu@N-term; Label: 13C(6)15N(4)(R)@5; Label: 13C(6)15N(2)(K)@13; Label: 13C(6)15N(2)(K)@18 | missed R-E@5; missed K-E@13 | 0.00843157  | 2367.20337 | 1184.609   | 2367.1958  | 1184.6051  | 2  | 15      | 15.9378 | 7.35  |
| 6 | 55.92 | 58    | 59.7 MAPK10_Flexill | 99.0 QLDERHTIEEWKELIYK               | Gln->pyro-Glu@N-term; Label: 13C(6)15N(4)(R)@5; Label: 13C(6)15N(2)(K)@13; Label: 13C(6)15N(2)(K)@18 | missed R-E@5; missed K-E@13 | 0.0141164   | 2367.21021 | 592.8098   | 2367.1958  | 592.806213 | 4  | 14      | 16.0976 | 7.35  |
| 6 | 55.92 | 58    | 59.7 MAPK10_Flexill | 99.0 TAGTSFMTPYVVTR                  | Label: 13C(6)15N(4)(R)@15                                                                            |                             | 0.00097718  | 1670.80444 | 836.4095   | 1670.80359 | 836.409058 | 2  | 16      | 14.7377 | 7.35  |
| 6 | 55.92 | 58    | 59.7 MAPK10_Flexill | 99.0 TAGTSFMTPYVVTR                  | Label: 13C(6)15N(4)(R)@15                                                                            |                             | -0.00122009 | 1670.80225 | 836.4084   | 1670.80359 | 836.409058 | 2  | 18      | 15.8513 | 7.35  |
| 6 | 55.92 | 58    | 59.7 MAPK10_Flexill | 99.0 TAGTSFMTPYVVTR                  | Label: 13C(6)15N(4)(R)@15                                                                            |                             | -0.0003656  | 1670.80322 | 836.4089   | 1670.80359 | 836.409058 | 2  | 19      | 16.1234 | 7.35  |
| 6 | 55.92 | 58    | 59.7 MAPK10_Flexill | 99.0 TAGTSFMTPYVVTR                  | Label: 13C(6)15N(4)(R)@15                                                                            |                             | 0.00097718  | 1670.80444 | 836.4095   | 1670.80359 | 836.409058 | 2  | 16      | 17.0653 | 7.35  |
| 6 | 55.92 | 58    | 59.7 MAPK10_Flexill | 99.0 TAGTSFMTPYVVTR                  | Label: 13C(6)15N(4)(R)@15                                                                            |                             | 0.00097718  | 1670.80444 | 836.4095   | 1670.80359 | 836.409058 | 2  | 11      | 25.1586 | 7.35  |
| 6 | 55.92 | 58    | 59.7 MAPK10_Flexill | 99.0 TAGTSFMTPYVVTR                  | Label: 13C(6)15N(4)(R)@15                                                                            |                             | 0.00341858  | 1670.80713 | 836.4108   | 1670.80359 | 836.409058 | 2  | 15      | 17.4642 | 7.35  |
| 6 | 55.92 | 58    | 59.7 MAPK10_Flexill | 99.0 TAGTSFMTPYVVTR                  | Label: 13C(6)15N(4)(R)@15                                                                            |                             | 0.00097718  | 1670.80444 | 836.4095   | 1670.80359 | 836.409058 | 2  | 9       | 26.2088 | 7.35  |
| 6 | 55.92 | 58    | 59.7 MAPK10_Flexill | 99.0 TAGTSFMTPYVVTR                  | Label: 13C(6)15N(4)(R)@15                                                                            |                             | 0.00097718  | 1670.80444 | 836.4095   | 1670.80359 | 836.409058 | 2  | 14      | 18.2729 | 7.35  |
| 6 | 55.92 | 58    | 59.7 MAPK10_Flexill | 99.0 TAGTSFMTPYVVTR                  | Label: 13C(6)15N(4)(R)@15                                                                            |                             | 0.00285701  | 1670.80652 | 836.4105   | 1670.80359 | 836.409058 | 2  | 16      | 15.7117 | 7.35  |
| 6 | 55.92 | 58    | 59.7 MAPK10_Flexill | 99.0 TAGTSFMTPYVVTR                  | Label: 13C(6)15N(4)(R)@15                                                                            |                             | 0.00097718  | 1670.80444 | 836.4095   | 1670.80359 | 836.409058 | 2  | 13      | 18.7915 | 7.35  |
| 6 | 55.92 | 58    | 59.7 MAPK10_Flexill | 99.0 TAGTSFMTPYVVTR                  | Label: 13C(6)15N(4)(R)@15                                                                            | -8.67E-05                   | 1670.80347  | 557.9418   | 1670.80359 | 557.941773 | 3          | 14 | 15.8768 | 7.35    |       |
| 6 | 55.92 | 58    | 59.7 MAPK10_Flexill | 99.0 TAGTSFMTPYVVTR                  | Label: 13C(6)15N(4)(R)@15                                                                            |                             | 0.00097718  | 1670.80444 | 836.4095   | 1670.80359 | 836.409058 | 2  | 13      | 18.5326 | 7.35  |
| 6 | 55.92 | 58    | 59.7 MAPK10_Flexill | 99.0 TAGTSFMTPYVVTR                  | Label: 13C(6)15N(4)(R)@15                                                                            |                             | -0.00271044 | 1660.79273 | 831.4036   | 1660.79529 | 831.404907 | 2  | 13      | 15.8039 | 7.35  |
| 6 | 55.92 | 58    | 59.7 MAPK10_Flexill | 99.0 TAGTSFMTPYVVTR                  | Label: 13C(6)15N(4)(R)@15                                                                            |                             | 0.00097718  | 1670.80444 | 836.4095   | 1670.80359 | 836.409058 | 2  | 12      | 19.0492 | 7.35  |
| 6 | 55.92 | 58    | 59.7 MAPK10_Flexill | 99.0 TAGTSFMTPYVVTR                  | Label: 13C(6)15N(4)(R)@15                                                                            |                             | -0.00191777 | 1670.80188 | 557.9412   | 1670.80359 | 557.941773 | 3  | 13      | 14.7319 | 7.35  |
| 6 | 55.92 | 58    | 59.7 MAPK10_Flexill | 99.0 TAGTSFMTPYVVTR                  | Label: 13C(6)15N(4)(R)@15                                                                            |                             | 0.00097718  | 1670.80444 | 836.4095   | 1670.80359 | 836.409058 | 2  | 12      | 24.3789 | 7.35  |
| 6 | 55.92 | 58    | 59.7 MAPK10_Flexill | 99.0 TAGTSFMTPYVVTR                  | Label: 13C(6)15N(4)(R)@15                                                                            |                             | 0.00097718  | 1670.80444 | 836.4095   | 1670.80359 | 836.409058 | 2  | 7       | 26.4654 | 7.35  |
| 6 | 55.92 | 58    | 59.7 MAPK10_Flexill | 99.0 TAGTSFMTPYVVTR                  | Label: 13C(6)15N(4)(R)@15                                                                            |                             | 0.00097718  | 1670.80444 | 836.4095   | 1670.80359 | 836.409058 | 2  | 6       | 26.9861 | 7.35  |
| 6 | 55.92 | 58    | 59.7 MAPK10_Flexill | 99.0 VIEQLGTPCPEFMK                  | Deamidated(Q)@4; Propionamide(C)@9; Label: 13C(6)15N(2)(K)@14                                        |                             | -0.00949164 | 1670.80444 | 836.4095   | 1670.81397 | 836.414246 | 2  | 12      | 15.0016 | 7.35  |
| 6 | 55.92 | 58    | 59.7 MAPK10_Flexill | 99.0 YPTFLYK                         | Label: 13C(6)15N(2)(K)@7                                                                             |                             | 0.00057017  | 938.499878 | 470.2572   | 938.499329 | 470.256928 | 2  | 9       | 15.0367 | 7.35  |
| 6 | 55.92 | 58    | 59.7 MAPK10_Flexill | 99.0 YPTFLYK                         | Label: 13C(6)15N(2)(K)@7                                                                             |                             | 0.0819955   | 938.507446 | 470.261    | 938.499329 | 470.256928 | 2  | 9       | 14.7754 | 7.35  |
| 6 | 55.92 | 58    | 59.7 MAPK10_Flexill | 99.0 YPTFLYK                         | Label: 13C(6)15N(2)(K)@7                                                                             |                             | 0.00073716  | 938.500061 | 470.2573   | 938.499329 | 470.256928 | 2  | 9       | 15.0782 | 7.35  |
| 6 | 55.92 | 58    | 59.7 MAPK10_Flexill | 99.0 YPTFLYK                         | Label: 13C(6)15N(2)(K)@7                                                                             |                             | 0.00082027  | 938.500244 | 470.2574   | 938.499329 | 470.256928 | 2  | 9       | 14.8156 | 7.35  |
| 7 | 55.61 | 59.66 | 62.8 HCFC1_Flexill  | 99.0 AGHCAVAINTR                     | Propionamide(C)@4                                                                                    |                             | -0.00294673 | 1182.58984 | 395.2039   | 1182.59277 | 395.204865 | 3  | 12      | 11.8275 | 10.99 |
| 7 | 55.61 | 59.66 | 62.8 HCFC1_Flexill  | 99.0 ANTNSLEVSWGA VATADSYLLQLQK      | Label: 13C(6)15N(2)(K)@25                                                                            |                             | -0.0100606  | 2686.35938 | 896.4604   | 2686.36939 | 896.463745 | 3  | 22      | 17.8302 | 10.99 |
| 7 | 55.61 | 59.66 | 62.8 HCFC1_Flexill  | 99.0 ARAGHCAVAINTR                   | Label: 13C(6)15N(4)(R)@2; Propionamide(C)@6; Label: 13C(6)15N(4)(R)@13                               | missed R-A@2                | -0.00050914 | 1429.74695 | 477.5896   | 1429.74756 | 477.589783 | 3  | 12      | 11.4469 | 10.99 |
| 7 | 55.61 | 59.66 | 62.8 HCFC1_Flexill  | 99.0 AWWNNQVCK                       | Propionamide(C)@7; Propionamide(C)@8; Label: 13C(6)15N(2)(K)@9                                       |                             | -0.00102736 | 1214.54065 | 608.2776   | 1214.54163 | 608.278076 | 2  | 10      | 12.5787 | 10.99 |
| 7 | 55.61 | 59.66 | 62.8 HCFC1_Flexill  | 99.0 CYLFGGLANDESDPK                 | Propionamide(C)@1; Label: 13C(6)15N(2)(K)@15                                                         |                             | -0.00409803 | 1706.76611 | 854.3903   | 1706.77014 | 854.392334 | 2  | 16      | 15.5327 | 10.99 |
| 7 | 55.61 | 59.66 | 62.8 HCFC1_Flexill  | 99.0 CYLFGGLANDESDPKNNIPR            | Propion                                                                                              |                             |             |            |            |            |            |    |         |         |       |

|   |       |       |      |                 |      |                            |                                                                                                  |             |            |          |            |            |   |    |         |       |
|---|-------|-------|------|-----------------|------|----------------------------|--------------------------------------------------------------------------------------------------|-------------|------------|----------|------------|------------|---|----|---------|-------|
| 7 | 55.61 | 59.66 | 62.8 | HCFC1_FlexIII   | 99.0 | LGHFSFLVGNK                | Label: 13C(6)15N(2)(K) @ 11                                                                      | -0.00842776 | 1165.62512 | 583.8198 | 1165.63355 | 583.824036 | 2 | 16 | 13.9572 | 10.99 |
| 7 | 55.61 | 59.66 | 62.8 | HCFC1_FlexIII   | 99.0 | LLVFGGMVEYVK               | Label: 13C(6)15N(2)(K) @ 12                                                                      | -0.0007878  | 1319.70313 | 660.8588 | 1319.70386 | 660.859253 | 2 | 12 | 16.4104 | 10.99 |
| 7 | 55.61 | 59.66 | 62.8 | HCFC1_FlexIII   | 99.0 | LVYVGMSGCR                 | Propionamide(C) @ 10                                                                             | 0.00077126  | 1225.5957  | 613.8051 | 1225.59473 | 613.804627 | 2 | 12 | 14.3682 | 10.99 |
| 7 | 55.61 | 59.66 | 62.8 | HCFC1_FlexIII   | 99.0 | MYVFGWVPLVMDDVK            | Label: 13C(6)15N(2)(K) @ 16                                                                      | -0.0127237  | 1862.90625 | 932.4604 | 1862.91907 | 932.466797 | 2 | 17 | 17.9166 | 10.99 |
| 7 | 55.61 | 59.66 | 62.8 | HCFC1_FlexIII   | 99.0 | NGPPPCPR                   | Propionamide(C) @ 6; Label: 13C(6)15N(4)(R) @ 8                                                  | -0.00143156 | 917.440247 | 459.7274 | 917.441711 | 459.728119 | 2 | 10 | 10.9735 | 10.99 |
| 7 | 55.61 | 59.66 | 62.8 | HCFC1_FlexIII   | 99.0 | RVVWVSGVPVPRPR             | Label: 13C(6)15N(4)(R) @ 1; Label: 13C(6)15N(4)(R) @ 11; Label: 13C(6)15N(4)(R) @ 13             | -0.00783948 | 1491.849   | 373.9695 | 1491.85657 | 373.971405 | 4 | 11 | 13.5149 | 10.99 |
| 7 | 55.61 | 59.66 | 62.8 | HCFC1_FlexIII   | 99.0 | SKLVIYGGMSGCR              | Label: 13C(6)15N(2)(K) @ 2; Propionamide(C) @ 12; Label: 13C(6)15N(4)(R) @ 13                    | 0.00146716  | 1458.74561 | 487.2558 | 1458.74426 | 487.255341 | 3 | 14 | 13.7982 | 10.99 |
| 7 | 55.61 | 59.66 | 62.8 | HCFC1_FlexIII   | 99.0 | SLHSATTIGNK                |                                                                                                  | 0.00015357  | 1127.59363 | 564.8041 | 1127.59351 | 564.804016 | 2 | 16 | 11.353  | 10.99 |
| 7 | 55.61 | 59.66 | 62.8 | HCFC1_FlexIII   | 99.0 | SLPTFLYK                   | Label: 13C(6)15N(2)(K) @ 9                                                                       | 0.00256272  | 1138.61804 | 570.3163 | 1138.61536 | 570.315002 | 2 | 9  | 16.044  | 10.99 |
| 7 | 55.61 | 59.66 | 62.8 | HCFC1_FlexIII   | 99.0 | VATHEKEWK                  | Label: 13C(6)15N(2)(K) @ 6; Label: 13C(6)15N(2)(K) @ 9                                           | -0.00134176 | 1142.60425 | 572.3094 | 1142.60547 | 572.310059 | 2 | 12 | 9.1831  | 10.99 |
| 7 | 55.61 | 59.66 | 62.8 | HCFC1_FlexIII   | 99.0 | VVWVSGVPVPRPR              | Label: 13C(6)15N(4)(R) @ 10; Label: 13C(6)15N(4)(R) @ 12                                         | -0.00177378 | 1325.74524 | 663.8799 | 1325.74077 | 663.880859 | 2 | 15 | 14.1815 | 10.99 |
| 7 | 55.61 | 59.66 | 62.8 | HCFC1_FlexIII   | 99.0 | YDIPATAATASPTPNPVPSPANPPK  | Deamidated(N) @ 16                                                                               | 0.0102654   | 2674.35938 | 892.4604 | 2674.34912 | 892.45697  | 3 | 15 | 14.711  | 10.99 |
| 7 | 55.61 | 59.66 | 62.8 | HCFC1_FlexIII   | 99.0 | YSDNLVeloASR               | Label: 13C(6)15N(4)(R) @ 12                                                                      | 0.00140831  | 1467.68823 | 734.8514 | 1467.68689 | 734.850769 | 2 | 16 | 14.2601 | 10.99 |
| 7 | 55.61 | 59.66 | 62.8 | HCFC1_FlexIII   | 99.0 | TPKNGPPPCPR                | Label: 13C(6)15N(2)(K) @ 3; Deamidated(N) @ 4; Propionamide(C) @ 9; Label: 13C(6)15N(4)(R) @ 11  | -0.00202408 | 1252.6333  | 418.5517 | 1252.63525 | 418.552368 | 3 | 10 | 11.1502 | 10.99 |
| 7 | 55.61 | 59.66 | 62.8 | HCFC1_FlexIII   | 99.0 | AGHCAVAINTR                | Propionamide(C) @ 4; Label: 13C(6)15N(4)(R) @ 11                                                 | -0.00439272 | 1192.59668 | 398.5395 | 1192.60107 | 398.540955 | 3 | 12 | 11.7545 | 10.99 |
| 7 | 55.61 | 59.66 | 62.8 | HCFC1_FlexIII   | 99.0 | AGHCAVAINTR                | Propionamide(C) @ 4                                                                              | 0.00254796  | 1182.59522 | 592.3049 | 1182.59277 | 592.30365  | 2 | 13 | 11.8717 | 10.99 |
| 7 | 55.61 | 59.66 | 62.8 | HCFC1_FlexIII   | 99.0 | AGHCAVAINTR                | Propionamide(C) @ 4; Label: 13C(6)15N(4)(R) @ 11                                                 | -0.00265322 | 1192.59851 | 398.5401 | 1192.60107 | 398.540955 | 3 | 12 | 12.0132 | 10.99 |
| 7 | 55.61 | 59.66 | 62.8 | HCFC1_FlexIII   | 99.0 | AGHCAVAINTR                | Propionamide(C) @ 4; Label: 13C(6)15N(4)(R) @ 11                                                 | -0.00082216 | 1192.60034 | 398.5407 | 1192.60107 | 398.540955 | 3 | 9  | 11.0624 | 10.99 |
| 7 | 55.61 | 59.66 | 62.8 | HCFC1_FlexIII   | 99.0 | ANTNSLEVSWGAVATADSYLLQLOK  | Deamidated(N) @ 4; Label: 13C(6)15N(2)(K) @ 25                                                   | 0.025823    | 2687.3794  | 896.8004 | 2687.35327 | 896.791748 | 3 | 11 | 17.703  | 10.99 |
| 7 | 55.61 | 59.66 | 62.8 | HCFC1_FlexIII   | 99.0 | ANTNSLEVSWGAVATADSYLLQLOK  | Deamidated(N) @ 4; Label: 13C(6)15N(2)(K) @ 25                                                   | 0.025823    | 2687.3794  | 896.8004 | 2687.35327 | 896.791748 | 3 | 14 | 18.0967 | 10.99 |
| 7 | 55.61 | 59.66 | 62.8 | HCFC1_FlexIII   | 99.0 | ANTNSLEVSWGAVATADSYLLQLOK  | Deamidated(N) @ 4; Label: 13C(6)15N(2)(K) @ 25                                                   | 0.0142279   | 2687.36743 | 1344.691 | 2687.35327 | 1344.68396 | 2 | 12 | 18.1225 | 10.99 |
| 7 | 55.61 | 59.66 | 62.8 | HCFC1_FlexIII   | 99.0 | CYLFGGLANDESDPKNNIPR       | Propionamide(C) @ 1; Deamidated(N) @ 9; Label: 13C(6)15N(2)(K) @ 15; Label: 13C(6)15N(4)(R) @ 20 | 0.0224315   | 2312.1084  | 771.7101 | 2312.08618 | 771.702698 | 3 | 13 | 15.1738 | 10.99 |
| 7 | 55.61 | 59.66 | 62.8 | HCFC1_FlexIII   | 99.0 | CYLFGGLANDESDPKNNIPR       | Propionamide(C) @ 1; Label: 13C(6)15N(2)(K) @ 15; Label: 13C(6)15N(4)(R) @ 20                    | 0.00156403  | 2311.10327 | 1156.559 | 2311.1023  | 1156.55835 | 2 | 25 | 15.2356 | 10.99 |
| 7 | 55.61 | 59.66 | 62.8 | HCFC1_FlexIII   | 99.0 | CYLFGGLANDESDPKNNIPR       | Propionamide(C) @ 1; Label: 13C(6)15N(2)(K) @ 15; Label: 13C(6)15N(4)(R) @ 20                    | -0.00942383 | 2311.09277 | 771.3715 | 2311.1023  | 771.374695 | 3 | 16 | 15.4534 | 10.99 |
| 7 | 55.61 | 59.66 | 62.8 | HCFC1_FlexIII   | 99.0 | CYLFGGLANDESDPKNNIPR       | Propionamide(C) @ 4; Label: 13C(6)15N(2)(K) @ 15; Label: 13C(6)15N(4)(R) @ 20                    | -0.00283051 | 2311.09937 | 1156.557 | 2311.1023  | 1156.55835 | 2 | 25 | 15.5038 | 10.99 |
| 7 | 55.61 | 59.66 | 62.8 | HCFC1_FlexIII   | 99.0 | CYLFGGLANDESDPKNNIPR       | Propionamide(C) @ 1; Deamidated(N) @ 9; Label: 13C(6)15N(2)(K) @ 15; Label: 13C(6)15N(4)(R) @ 20 | 0.00399733  | 2312.09009 | 579.0298 | 2312.08618 | 579.028809 | 4 | 13 | 15.5218 | 10.99 |
| 7 | 55.61 | 59.66 | 62.8 | HCFC1_FlexIII   | 99.0 | CYLFGGLANDESDPKNNIPR       | Propionamide(C) @ 1; Label: 13C(6)15N(2)(K) @ 15; Label: 13C(6)15N(4)(R) @ 20                    | -0.00997315 | 2311.09204 | 771.3713 | 2311.1023  | 771.374695 | 3 | 16 | 15.7347 | 10.99 |
| 7 | 55.61 | 59.66 | 62.8 | HCFC1_FlexIII   | 99.0 | CYLFGGLANDESDPKNNIPR       | Propionamide(C) @ 1; Label: 13C(6)15N(2)(K) @ 15; Label: 13C(6)15N(4)(R) @ 20                    | 0.004982    | 2311.10742 | 1156.561 | 2311.1023  | 1156.55835 | 2 | 22 | 15.7897 | 10.99 |
| 7 | 55.61 | 59.66 | 62.8 | HCFC1_FlexIII   | 99.0 | DLWYLETEKPPPPAR            | Label: 13C(6)15N(2)(K) @ 9; Label: 13C(6)15N(4)(R) @ 15                                          | 0.0098025   | 1828.95789 | 610.6599 | 1828.94768 | 610.656555 | 3 | 14 | 15.2552 | 10.99 |
| 7 | 55.61 | 59.66 | 62.8 | HCFC1_FlexIII   | 99.0 | DLWYLETEKPPPPAR            | Label: 13C(6)15N(2)(K) @ 9; Label: 13C(6)15N(4)(R) @ 15                                          | -0.00167061 | 1828.94605 | 915.4803 | 1828.94788 | 915.481201 | 2 | 18 | 15.2781 | 10.99 |
| 7 | 55.61 | 59.66 | 62.8 | HCFC1_FlexIII   | 99.0 | DLWYLETEKPPPPAR            | Label: 13C(6)15N(2)(K) @ 9; Label: 13C(6)15N(4)(R) @ 15                                          | 0.00162529  | 1828.94946 | 915.482  | 1828.94788 | 915.481201 | 2 | 20 | 15.8138 | 10.99 |
| 7 | 55.61 | 59.66 | 62.8 | HCFC1_FlexIII   | 99.0 | DLWYLETEKPPPPAR            | Label: 13C(6)15N(2)(K) @ 9; Label: 13C(6)15N(4)(R) @ 15                                          | -0.00118384 | 1828.94678 | 610.6562 | 1828.94788 | 610.656555 | 3 | 14 | 15.8408 | 10.99 |
| 7 | 55.61 | 59.66 | 62.8 | HCFC1_FlexIII   | 99.0 | DLWYLETEKPPPPAR            | Label: 13C(6)15N(2)(K) @ 9; Label: 13C(6)15N(4)(R) @ 15                                          | -0.00167061 | 1828.94605 | 915.4803 | 1828.94788 | 915.481201 | 2 | 16 | 16.0935 | 10.99 |
| 7 | 55.61 | 59.66 | 62.8 | HCFC1_FlexIII   | 99.0 | ESHTAVVYTEK                | Label: 13C(6)15N(2)(K) @ 11                                                                      | -0.0294554  | 1270.62549 | 424.5491 | 1270.62854 | 424.55011  | 3 | 11 | 11.6217 | 10.99 |
| 7 | 55.61 | 59.66 | 62.8 | HCFC1_FlexIII   | 99.0 | ESHTAVVYTEKDNK             | Label: 13C(6)15N(2)(K) @ 11; Label: 13C(6)15N(2)(K) @ 14                                         | 0.00997409  | 1635.81751 | 546.2798 | 1635.8075  | 546.276428 | 3 | 17 | 11.0556 | 10.99 |
| 7 | 55.61 | 59.66 | 62.8 | HCFC1_FlexIII   | 99.0 | ESHTAVVYTEKDNK             | Label: 13C(6)15N(2)(K) @ 11; Label: 13C(6)15N(2)(K) @ 14                                         | 0.00997409  | 1635.81751 | 546.2798 | 1635.8075  | 546.276428 | 3 | 14 | 11.3164 | 10.99 |
| 7 | 55.61 | 59.66 | 62.8 | HCFC1_FlexIII   | 99.0 | ESHTAVVYTEKDNKK            | Label: 13C(6)15N(2)(K) @ 11; Label: 13C(6)15N(2)(K) @ 14; Label: 13C(6)15N(2)(K) @ 15            | 0.011035    | 1771.92749 | 591.6498 | 1771.91663 | 591.646179 | 3 | 15 | 9.2587  | 10.99 |
| 7 | 55.61 | 59.66 | 62.8 | HCFC1_FlexIII   | 99.0 | ESHTAVVYTEKDNKK            | Label: 13C(6)15N(2)(K) @ 11; Label: 13C(6)15N(2)(K) @ 14; Label: 13C(6)15N(2)(K) @ 15            | 0.00938859  | 1771.92603 | 886.9703 | 1771.91663 | 886.965637 | 2 | 10 | 9.2997  | 10.99 |
| 7 | 55.61 | 59.66 | 62.8 | HCFC1_FlexIII   | 99.0 | ESHTAVVYTEKDNKK            | Label: 13C(6)15N(2)(K) @ 11; Label: 13C(6)15N(2)(K) @ 14; Label: 13C(6)15N(2)(K) @ 15            | 0.011035    | 1771.92749 | 591.6498 | 1771.91663 | 591.646179 | 3 | 16 | 9.5129  | 10.99 |
| 7 | 55.61 | 59.66 | 62.8 | HCFC1_FlexIII   | 99.0 | ESHTAVVYTEKDNKK            | Label: 13C(6)15N(2)(K) @ 11; Label: 13C(6)15N(2)(K) @ 14; Label: 13C(6)15N(2)(K) @ 15            | 0.00938859  | 1771.92603 | 886.9703 | 1771.91663 | 886.965637 | 2 | 18 | 9.5588  | 10.99 |
| 7 | 55.61 | 59.66 | 62.8 | HCFC1_FlexIII   | 99.0 | ESHTAVVYTEKDNKK            | Label: 13C(6)15N(2)(K) @ 11; Label: 13C(6)15N(2)(K) @ 14; Label: 13C(6)15N(2)(K) @ 15            | 0.011035    | 1771.92749 | 591.6498 | 1771.91663 | 591.646179 | 3 | 15 | 9.7771  | 10.99 |
| 7 | 55.61 | 59.66 | 62.8 | HCFC1_FlexIII   | 99.0 | ESHTAVVYTEKDNKK            | Label: 13C(6)15N(2)(K) @ 11; Label: 13C(6)15N(2)(K) @ 14; Label: 13C(6)15N(2)(K) @ 15            | 0.00938859  | 1771.92603 | 886.9703 | 1771.91663 | 886.965637 | 2 | 9  | 9.8217  | 10.99 |
| 7 | 55.61 | 59.66 | 62.8 | HCFC1_FlexIII   | 99.0 | ESHTAVVYTEKDNKK            | Label: 13C(6)15N(2)(K) @ 11; Label: 13C(6)15N(2)(K) @ 14; Label: 13C(6)15N(2)(K) @ 15            | 0.011035    | 1771.92749 | 591.6498 | 1771.91663 | 591.646179 | 3 | 15 | 10.0383 | 10.99 |
| 7 | 55.61 | 59.66 | 62.8 | HCFC1_FlexIII   | 99.0 | ESHTAVVYTEKDNKK            | Label: 13C(6)15N(2)(K) @ 11; Label: 13C(6)15N(2)(K) @ 14; Label: 13C(6)15N(2)(K) @ 15            | 0.011035    | 1771.92749 | 591.6498 | 1771.91663 | 591.646179 | 3 | 15 | 10.3038 | 10.99 |
| 7 | 55.61 | 59.66 | 62.8 | HCFC1_FlexIII   | 99.0 | ESHTAVVYTEKDNKK            | Label: 13C(6)15N(2)(K) @ 11; Label: 13C(6)15N(2)(K) @ 14; Label: 13C(6)15N(2)(K) @ 15            | -0.00147872 | 1771.91541 | 443.9861 | 1771.91663 | 443.98645  | 4 | 10 | 9.2564  | 10.99 |
| 7 | 55.61 | 59.66 | 62.8 | HCFC1_FlexIII   | 99.0 | ESHTAVVYTEKDNKK            | Label: 13C(6)15N(2)(K) @ 11; Label: 13C(6)15N(2)(K) @ 14; Label: 13C(6)15N(2)(K) @ 15            | 0.0124373   | 1771.92932 | 443.9896 | 1771.91663 | 443.98645  | 4 | 10 | 9.5116  | 10.99 |
| 7 | 55.61 | 59.66 | 62.8 | HCFC1_FlexIII   | 99.0 | ESHTAVVYTEKDNKK            | Label: 13C(6)15N(2)(K) @ 11; Label: 13C(6)15N(2)(K) @ 14; Label: 13C(6)15N(2)(K) @ 15            | 0.0124373   | 1771.92932 | 443.9896 | 1771.91663 | 443.98645  | 4 | 10 | 10.3016 | 10.99 |
| 7 | 55.61 | 59.66 | 62.8 | HCFC1_FlexIII   | 99.0 | ESHTAVVYTEKDNKK            | Label: 13C(6)15N(2)(K) @ 11; Label: 13C(6)15N(2)(K) @ 14; Label: 13C(6)15N(2)(K) @ 15            | -0.0034944  | 1771.91309 | 355.3899 | 1771.91663 | 355.390625 | 5 | 9  | 9.2609  | 10.99 |
| 7 | 55.61 | 59.66 | 62.8 | HCFC1_FlexIII   | 99.0 | GDIPPGCAAYGFVCDGTR         | Propionamide(C) @ 7; Propionamide(C) @ 14; Label: 13C(6)15N(4)(R) @ 18                           | -0.00384658 | 1949.86011 | 975.9373 | 1949.86389 | 975.93927  | 2 | 18 | 14.9371 | 10.99 |
| 7 | 55.61 | 59.66 | 62.8 | HCFC1_FlexIII   | 99.0 | GDIPPGCAAYGFVCDGTR         | Propionamide(C) @ 7; Propionamide(C) @ 14; Label: 13C(6)15N(4)(R) @ 18                           | -0.00592329 | 1949.85828 | 650.96   | 1949.86389 | 650.961914 | 3 | 13 | 15.3402 | 10.99 |
| 7 | 55.61 | 59.66 | 62.8 | HCFC1_FlexIII   | 99.0 | GDIPPGCAAYGFVCDGTR         | Propionamide(C) @ 7; Propionamide(C) @ 14; Label: 13C(6)15N(4)(R) @ 18                           | -0.00189345 | 1949.86206 | 975.9383 | 1949.86389 | 975.93927  | 2 | 19 | 15.4673 | 10.99 |
| 7 | 55.61 | 59.66 | 62.8 | HCFC1_FlexIII   | 99.0 | LDGLWLTDIDTLWNKPSLSGVAPLPR | Deamidated(N) @ 15; Label: 13C(6)15N(2)(K) @ 16; Label: 13C(6)15N(4)(R) @ 27                     | 0.0133897   | 2996.61133 | 750.1601 | 2996.5979  | 750.156738 | 4 | 16 | 17.4937 | 10.99 |
| 7 | 55.61 | 59.66 | 62.8 | HCFC1_FlexIII   | 99.0 | LDGLWLTDIDTLWNKPSLSGVAPLPR | Deamidated(N) @ 15; Label: 13C(6)15N(2)(K) @ 16; Label: 13C(6)15N(4)(R) @ 27                     | 0.0219972   | 2996.62012 | 999.8806 | 2996.5979  | 999.87323  | 3 | 16 | 17.7477 | 10.99 |
| 7 | 55.61 | 59.66 | 62.8 | HCFC1_FlexIII   | 99.0 | LGHFSFLVGNK                | Label: 13C(6)15N(2)(K) @ 11                                                                      | 0.00072753  | 1165.63428 | 583.8244 | 1165.63355 | 583.824036 | 2 | 18 | 13.8994 | 10.99 |
| 7 | 55.61 | 59.66 | 62.8 | HCFC1_FlexIII</ |      |                            |                                                                                                  |             |            |          |            |            |   |    |         |       |

|   |       |       |      |               |      |                                   |                                                                             |             |            |          |            |            |   |    |         |       |
|---|-------|-------|------|---------------|------|-----------------------------------|-----------------------------------------------------------------------------|-------------|------------|----------|------------|------------|---|----|---------|-------|
| 7 | 55.61 | 59.66 | 62.8 | HCFC1_FlexIII | 99.0 | MYVFGGWVPLVMDDVK                  | Label:13C(6)15N(2)(K)@16                                                    | -0.00131164 | 1862.91797 | 621.9799 | 1862.91907 | 621.980286 | 3 | 13 | 17.9607 | 10.99 |
| 7 | 55.61 | 59.66 | 62.8 | HCFC1_FlexIII | 99.0 | MYVFGGWVPLVMDDVK                  | Oxidation(M)@1; Label:13C(6)15N(2)(K)@16                                    | -0.00761041 | 1878.90625 | 940.4604 | 1878.91394 | 940.464233 | 2 | 18 | 17.9824 | 10.99 |
| 7 | 55.61 | 59.66 | 62.8 | HCFC1_FlexIII | 99.0 | MYVFGGWVPLVMDDVK                  | Label:13C(6)15N(2)(K)@16                                                    | 0.00082611  | 1862.91992 | 932.4672 | 1862.91907 | 932.466797 | 2 | 18 | 18.1811 | 10.99 |
| 7 | 55.61 | 59.66 | 62.8 | HCFC1_FlexIII | 99.0 | MYVFGGWVPLVMDDVK                  | Label:13C(6)15N(2)(K)@16                                                    | 0.00717378  | 1862.92627 | 932.4704 | 1862.91907 | 932.466797 | 2 | 16 | 18.4384 | 10.99 |
| 7 | 55.61 | 59.66 | 62.8 | HCFC1_FlexIII | 99.0 | MYVFGGWVPLVMDDVK                  | Label:13C(6)15N(2)(K)@16                                                    | 0.00717378  | 1862.92627 | 932.4704 | 1862.91907 | 932.466797 | 2 | 11 | 18.7231 | 10.99 |
| 7 | 55.61 | 59.66 | 62.8 | HCFC1_FlexIII | 99.0 | NGPPPCPR                          | Propionamide(C)@6; Label:13C(6)15N(4)(R)@8                                  | -0.00063811 | 917.441101 | 459.7278 | 917.441711 | 459.728119 | 2 | 10 | 11.2446 | 10.99 |
| 7 | 55.61 | 59.66 | 62.8 | HCFC1_FlexIII | 99.0 | NGPPPCPR                          | Deamidated(N)@1; Propionamide(C)@6; Label:13C(6)15N(4)(R)@8                 | -0.0107042  | 918.424683 | 460.2196 | 918.42572  | 460.220123 | 2 | 10 | 11.3874 | 10.99 |
| 7 | 55.61 | 59.66 | 62.8 | HCFC1_FlexIII | 99.0 | NGPPPCPR                          | Deamidated(N)@1; Propionamide(C)@6; Label:13C(6)15N(4)(R)@8                 | -0.00204699 | 918.423645 | 460.2191 | 918.42572  | 460.220123 | 2 | 10 | 11.6669 | 10.99 |
| 7 | 55.61 | 59.66 | 62.8 | HCFC1_FlexIII | 99.0 | RVVGWSGVPVPRPR                    | Label:13C(6)15N(4)(R)@1; Label:13C(6)15N(4)(R)@11; Label:13C(6)15N(4)(R)@13 | -0.0006358  | 1491.85596 | 498.2926 | 1491.85657 | 498.292786 | 3 | 12 | 13.4291 | 10.99 |
| 7 | 55.61 | 59.66 | 62.8 | HCFC1_FlexIII | 99.0 | SKLVIYGGMSGCR                     | Label:13C(6)15N(2)(K)@2; Propionamide(C)@12; Label:13C(6)15N(4)(R)@13       | 0.00210954  | 1458.74622 | 730.3804 | 1458.74426 | 730.379395 | 2 | 14 | 13.8204 | 10.99 |
| 7 | 55.61 | 59.66 | 62.8 | HCFC1_FlexIII | 99.0 | SLHSATTIGNK                       | Label:13C(6)15N(2)(K)@11                                                    | -0.00152071 | 1135.6062  | 379.5427 | 1135.60767 | 379.543182 | 3 | 12 | 11.2255 | 10.99 |
| 7 | 55.61 | 59.66 | 62.8 | HCFC1_FlexIII | 99.0 | SLHSATTIGNK                       | Label:13C(6)15N(2)(K)@11                                                    | -0.00084781 | 1135.60693 | 568.8107 | 1135.60767 | 568.811096 | 2 | 15 | 11.2695 | 10.99 |
| 7 | 55.61 | 59.66 | 62.8 | HCFC1_FlexIII | 99.0 | SLHSATTIGNK                       | Label:13C(6)15N(2)(K)@11                                                    | -0.00243624 | 1135.60535 | 379.5424 | 1135.60767 | 379.543182 | 3 | 11 | 11.5053 | 10.99 |
| 7 | 55.61 | 59.66 | 62.8 | HCFC1_FlexIII | 99.0 | SLHSATTIGNK                       | Label:13C(6)15N(2)(K)@11                                                    | -0.00023746 | 1135.60742 | 568.811  | 1135.60767 | 568.811096 | 2 | 12 | 11.5331 | 10.99 |
| 7 | 55.61 | 59.66 | 62.8 | HCFC1_FlexIII | 99.0 | SLHSATTIGNK                       | Label:13C(6)15N(2)(K)@11                                                    | -0.0111338  | 1135.59668 | 379.5395 | 1135.60767 | 379.543182 | 3 | 9  | 10.5868 | 10.99 |
| 7 | 55.61 | 59.66 | 62.8 | HCFC1_FlexIII | 99.0 | VVGWSGVPVPRPR                     | Label:13C(6)15N(4)(R)@10; Label:13C(6)15N(4)(R)@12                          | -0.00177378 | 1325.74524 | 663.8799 | 1325.74707 | 663.880859 | 2 | 14 | 13.9162 | 10.99 |
| 7 | 55.61 | 59.66 | 62.8 | HCFC1_FlexIII | 99.0 | VVGWSGVPVPRPR                     | Label:13C(6)15N(4)(R)@10; Label:13C(6)15N(4)(R)@12                          | 0.00323111  | 1325.75024 | 663.8824 | 1325.74707 | 663.880859 | 2 | 11 | 14.4376 | 10.99 |
| 7 | 55.61 | 59.66 | 62.8 | HCFC1_FlexIII | 99.0 | YDIPATAATATSPTPNPVPSVPANPPK       | Label:13C(6)15N(2)(K)@27                                                    | 0.00383697  | 2681.38281 | 894.8016 | 2681.37915 | 894.800354 | 3 | 14 | 14.4124 | 10.99 |
| 7 | 55.61 | 59.66 | 62.8 | HCFC1_FlexIII | 99.0 | YDIPATAATATSPTPNPVPSVPANPPK       | Deamidated(N)@16; Label:13C(6)15N(2)(K)@27                                  | 0.0244023   | 2682.38745 | 1342.201 | 2682.36328 | 1342.18884 | 2 | 12 | 14.5777 | 10.99 |
| 7 | 55.61 | 59.66 | 62.8 | HCFC1_FlexIII | 99.0 | YDIPATAATATSPTPNPVPSVPANPPK       | Deamidated(N)@16; Label:13C(6)15N(2)(K)@27                                  | 0.00743146  | 2682.37061 | 671.5999 | 2682.36328 | 671.598084 | 4 | 15 | 14.6626 | 10.99 |
| 7 | 55.61 | 59.66 | 62.8 | HCFC1_FlexIII | 99.0 | YDIPATAATATSPTPNPVPSVPANPPK       | Label:13C(6)15N(2)(K)@27                                                    | 0.0035796   | 2681.37964 | 894.8005 | 2681.37915 | 894.800354 | 3 | 22 | 14.6947 | 10.99 |
| 7 | 55.61 | 59.66 | 62.8 | HCFC1_FlexIII | 99.0 | YDIPATAATATSPTPNPVPSVPANPPK       | Deamidated(N)@16; Label:13C(6)15N(2)(K)@27                                  | 0.0244023   | 2682.38745 | 1342.201 | 2682.36328 | 1342.18884 | 2 | 18 | 14.8483 | 10.99 |
| 7 | 55.61 | 59.66 | 62.8 | HCFC1_FlexIII | 99.0 | YDIPATAATATSPTPNPVPSVPANPPK       | Deamidated(N)@16; Label:13C(6)15N(2)(K)@27                                  | 0.00602917  | 2682.36939 | 895.1304 | 2682.36328 | 895.128357 | 3 | 14 | 14.9548 | 10.99 |
| 7 | 55.61 | 59.66 | 62.8 | HCFC1_FlexIII | 99.0 | YPTFLYK                           | Label:13C(6)15N(2)(K)@7                                                     | 0.00057017  | 938.498878 | 470.2572 | 938.499329 | 470.256928 | 2 | 9  | 15.0367 | 10.99 |
| 7 | 55.61 | 59.66 | 62.8 | HCFC1_FlexIII | 99.0 | YPTFLYK                           | Label:13C(6)15N(2)(K)@7                                                     | 0.00819955  | 938.507446 | 470.261  | 938.499329 | 470.256928 | 2 | 9  | 14.7754 | 10.99 |
| 7 | 55.61 | 59.66 | 62.8 | HCFC1_FlexIII | 99.0 | YPTFLYK                           | Label:13C(6)15N(2)(K)@7                                                     | 0.00073716  | 938.500061 | 470.2573 | 938.499329 | 470.256928 | 2 | 9  | 15.0782 | 10.99 |
| 7 | 55.61 | 59.66 | 62.8 | HCFC1_FlexIII | 99.0 | YPTFLYK                           | Label:13C(6)15N(2)(K)@7                                                     | 0.00092027  | 938.500244 | 470.2574 | 938.499329 | 470.256928 | 2 | 9  | 14.8156 | 10.99 |
| 7 | 55.61 | 59.66 | 62.8 | HCFC1_FlexIII | 99.0 | YSNDLYEQASR                       | Label:13C(6)15N(4)(R)@12                                                    | 0.00287316  | 1467.68892 | 734.8522 | 1467.68869 | 734.850769 | 2 | 14 | 15.4328 | 10.99 |
| 8 | 55.19 | 57.25 | 70.0 | NET1_FlexIII  | 99.0 | AAIAPFQSAGSPPELQGLPELHEECEGNHPSAR | Deamidated(Q)@16; Propionamide(C)@25; Label:13C(6)15N(4)(R)@33              | -0.00581902 | 3520.64966 | 881.1697 | 3520.65576 | 881.171204 | 4 | 12 | 15.507  | 4.38  |
| 8 | 55.19 | 57.25 | 70.0 | NET1_FlexIII  | 99.0 | ASTVSSVTQVEVDENAYR                | Label:13C(6)15N(4)(R)@18                                                    | -0.011676   | 1963.92444 | 982.9695 | 1963.93628 | 982.975403 | 2 | 21 | 14.1018 | 4.38  |
| 8 | 55.19 | 57.25 | 70.0 | NET1_FlexIII  | 99.0 | AYHDPMLK                          | Label:13C(6)15N(2)(K)@8                                                     | -0.00128387 | 981.482056 | 491.7483 | 981.483337 | 491.748932 | 2 | 12 | 12.5129 | 4.38  |
| 8 | 55.19 | 57.25 | 70.0 | NET1_FlexIII  | 99.0 | CGSGMQMAEDSK                      | Propionamide(C)@1; Label:13C(6)15N(2)(K)@12                                 | -0.00091979 | 1321.51831 | 661.7664 | 1321.51917 | 661.766907 | 2 | 16 | 11.9557 | 4.38  |
| 8 | 55.19 | 57.25 | 70.0 | NET1_FlexIII  | 99.0 | ETLVYPTFLYK                       | Label:13C(6)15N(2)(K)@11                                                    | -0.00243117 | 1380.73962 | 691.3771 | 1380.74207 | 691.378296 | 2 | 12 | 16.2028 | 4.38  |
| 8 | 55.19 | 57.25 | 70.0 | NET1_FlexIII  | 99.0 | FHDPSPAQSHTLQANDVFHK              | Label:13C(6)15N(2)(K)@20                                                    | -0.00424836 | 2283.08716 | 457.6247 | 2283.09131 | 457.625519 | 5 | 13 | 13.0674 | 4.38  |
| 8 | 55.19 | 57.25 | 70.0 | NET1_FlexIII  | 99.0 | GEQDLIEDLK                        | Label:13C(6)15N(2)(K)@10                                                    | -9.83E-05   | 1166.59082 | 584.3027 | 1166.59106 | 584.302795 | 2 | 13 | 14.9637 | 4.38  |
| 8 | 55.19 | 57.25 | 70.0 | NET1_FlexIII  | 99.0 | GEQDLIEDLKAR                      | Label:13C(6)15N(2)(K)@10; Label:13C(6)15N(4)(R)@13                          | -0.0123127  | 1516.80945 | 506.6104 | 1516.82153 | 506.614471 | 3 | 10 | 15.6321 | 4.38  |
| 8 | 55.19 | 57.25 | 70.0 | NET1_FlexIII  | 99.0 | GYCSNQLAAK                        | Propionamide(C)@3; Label:13C(6)15N(2)(K)@10                                 | 0.00098546  | 1132.5437  | 567.2791 | 1132.5426  | 567.278626 | 2 | 10 | 11.9783 | 4.38  |
| 8 | 55.19 | 57.25 | 70.0 | NET1_FlexIII  | 99.0 | HSYQVVR                           | Label:13C(6)15N(4)(R)@7                                                     | 0.00015765  | 961.464661 | 481.7396 | 961.464539 | 481.739533 | 2 | 10 | 11.5527 | 4.38  |
| 8 | 55.19 | 57.25 | 70.0 | NET1_FlexIII  | 99.0 | IGEATKPDGTVEQIGHILVSWLPR          | Label:13C(6)15N(2)(K)@6; Label:13C(6)15N(4)(R)@24                           | -0.0582987  | 2633.37134 | 659.3501 | 2633.65596 | 659.364685 | 4 | 13 | 17.7443 | 4.38  |
| 8 | 55.19 | 57.25 | 70.0 | NET1_FlexIII  | 99.0 | IRFHDPSPAQSHTLQANDVFHK            | Label:13C(6)15N(4)(R)@2; Deamidated(Q)@10; Label:13C(6)15N(2)(K)@22         | -0.00334498 | 2563.26489 | 513.6603 | 2563.2688  | 513.661011 | 5 | 12 | 13.2792 | 4.38  |
| 8 | 55.19 | 57.25 | 70.0 | NET1_FlexIII  | 99.0 | KAYHDPMLK                         | Label:13C(6)15N(2)(K)@1; Label:13C(6)15N(2)(K)@9                            | 0.00010456  | 1117.59265 | 559.8036 | 1117.59253 | 559.803528 | 2 | 13 | 11.6906 | 4.38  |
| 8 | 55.19 | 57.25 | 70.0 | NET1_FlexIII  | 99.0 | KLDLVSFLDIPR                      | Label:13C(6)15N(2)(K)@1; Label:13C(6)15N(4)(R)@12                           | -0.00642185 | 1519.84522 | 760.9299 | 1519.85181 | 760.933167 | 2 | 19 | 17.7899 | 4.38  |
| 8 | 55.19 | 57.25 | 70.0 | NET1_FlexIII  | 99.0 | LKVYPLLK                          | Label:13C(6)15N(2)(K)@3; Label:13C(6)15N(2)(K)@9                            | 0.0103959   | 1101.75989 | 368.2606 | 1101.74963 | 368.257172 | 3 | 12 | 14.9897 | 4.38  |
| 8 | 55.19 | 57.25 | 70.0 | NET1_FlexIII  | 99.0 | QEAIVEMSR                         | Label:13C(6)15N(4)(R)@9                                                     | 0.00031196  | 1135.52112 | 568.7678 | 1135.52075 | 568.767639 | 2 | 11 | 13.4808 | 4.38  |
| 8 | 55.19 | 57.25 | 70.0 | NET1_FlexIII  | 99.0 | QPPIVQELVLEDLQDGDVR               | Gln->pyro-Glu@N-term; Label:13C(6)15N(4)(R)@19                              | -0.0153971  | 2155.08814 | 719.37   | 2155.10352 | 719.375183 | 3 | 19 | 18.2158 | 4.38  |
| 8 | 55.19 | 57.25 | 70.0 | NET1_FlexIII  | 99.0 | RASTVSSVTQVEVDENAYR               | Label:13C(6)15N(4)(R)@1; Label:13C(6)15N(4)(R)@19                           | -0.0012175  | 2130.04346 | 1066.029 | 2130.04565 | 1066.03003 | 2 | 29 | 13.6397 | 4.38  |
| 8 | 55.19 | 57.25 | 70.0 | NET1_FlexIII  | 99.0 | RFGQTIGSFTLR                      | Label:13C(6)15N(4)(R)@1; Label:13C(6)15N(4)(R)@12                           | -0.00088223 | 1472.79932 | 491.9404 | 1472.80029 | 491.940704 | 3 | 14 | 14.756  | 4.38  |
| 8 | 55.19 | 57.25 | 70.0 | NET1_FlexIII  | 99.0 | RKETLYPTFLYK                      | Label:13C(6)15N(4)(R)@1; Label:13C(6)15N(2)(K)@2; Label:13C(6)15N(2)(K)@13  | -0.0115824  | 1682.9491  | 561.9903 | 1682.96057 | 561.994141 | 3 | 13 | 15.3375 | 4.38  |
| 8 | 55.19 | 57.25 | 70.0 | NET1_FlexIII  | 99.0 | RQEAIVEMSR                        | Label:13C(6)15N(4)(R)@1; Label:13C(6)15N(4)(R)@10                           | -0.0104108  | 1301.61963 | 434.8805 | 1301.63013 | 434.883972 | 3 | 12 | 12.7475 | 4.38  |
| 8 | 55.19 | 57.25 | 70.0 | NET1_FlexIII  | 99.0 | RSSALWSEMLDITMK                   | Label:13C(6)15N(4)(R)@1; Label:13C(6)15N(2)(K)@15                           | -0.00394346 | 1784.88806 | 595.97   | 1784.89197 | 595.971252 | 3 | 14 | 17.5886 | 4.38  |
| 8 | 55.19 | 57.25 | 70.0 | NET1_FlexIII  | 99.0 | SSALWSEMLDITMK                    | Label:13C(6)15N(2)(K)@14                                                    | -0.00353773 | 1618.77905 | 540.6003 | 1618.78259 | 540.601502 | 3 | 14 | 17.7163 | 4.38  |
| 8 | 55.19 | 57.25 | 70.0 | NET1_FlexIII  | 99.0 | VLLCHGELR                         | Propionamide(C)@4; Label:13C(6)15N(4)(R)@9                                  | -0.00037223 | 1119.6095  | 560.812  | 1119.60986 | 560.812195 | 2 | 11 | 13.0151 | 4.38  |
| 8 | 55.19 | 57.25 | 70.0 | NET1_FlexIII  | 99.0 | VTSLANLISVPR                      | Label:13C(6)15N(4)(R)@12                                                    | -0.00138227 | 1278.75232 | 640.3834 | 1278.75354 | 640.384033 | 2 | 12 | 16.2762 | 4.38  |
| 8 | 55.19 | 57.25 | 70.0 | NET1_FlexIII  | 99.0 | YPLLK                             | Label:13C(6)15N(2)(K)@6                                                     | 0.00064964  | 753.488648 | 377.7516 | 753.488037 | 377.751282 | 2 | 8  | 15.0688 | 4.38  |
| 8 | 55.19 | 57.25 | 70.0 | NET1_FlexIII  | 99.0 | AAIAPFQSAGSPPELQGLPELHEECEGNHPSAR | Deamidated(Q)@16; Propionamide(C)@25; Label:13C(6)15N(4)(R)@33              | -0.00581902 | 3520.64966 | 881.1697 | 3520.65576 | 881.171204 | 4 | 11 | 15.2383 | 4.38  |
| 8 | 55.19 | 57.25 | 70.0 | NET1_FlexIII  | 99.0 | AAIAPFQSAGSPPELQGLPELHEECEGNHPSAR | Deamidated(Q)@7; Propionamide(C)@25; Label:13C(6)15N(4)(R)@33               | 0.00046969  | 3520.65503 | 1174.559 | 3520.65576 | 1174.5592  | 3 | 13 | 15.2787 | 4.38  |
| 8 | 55.19 | 57.25 | 70.0 | NET1_FlexIII  | 99.0 | ASTVSSVTQVEVDENAYR                | Label:13C(6)15N(4)(R)@18                                                    | -0.00758875 | 1963.92847 | 655.6501 | 1963.93628 | 655.65271  | 3 | 14 | 14.1389 | 4.38  |
| 8 | 55.19 | 57.25 | 70.0 | NET1_FlexIII  | 99.0 | ASTVSSVTQVEVDENAYR                | Label:13C(6)15N(4)(R)@18                                                    | 0.00834349  | 1963.9447  | 982.9796 | 1963.93628 | 982.975403 | 2 | 16 | 14.363  | 4.38  |
| 8 | 55.19 | 57.25 | 70.0 | NET1_FlexIII  | 99.0 |                                   |                                                                             |             |            |          |            |            |   |    |         |       |

|   |       |       |                    |                                      |                                                                                                                                                                     |                                  |             |            |          |            |            |   |    |         |       |
|---|-------|-------|--------------------|--------------------------------------|---------------------------------------------------------------------------------------------------------------------------------------------------------------------|----------------------------------|-------------|------------|----------|------------|------------|---|----|---------|-------|
| 8 | 55.19 | 57.25 | 70.0 NET1_FlexIII  | 99.0 KLDLWSFLDIR                     | Label: 13C(6)15N(2)(K) @ 1; Label: 13C(6)15N(4)(R) @ 12                                                                                                             | missed K-L @ 1                   | 0.00318908  | 1519.85498 | 507.6256 | 1519.85181 | 507.624542 | 3 | 14 | 17.7808 | 4.38  |
| 8 | 55.19 | 57.25 | 70.0 NET1_FlexIII  | 99.0 KLDLWSFLDIR                     | Label: 13C(6)15N(2)(K) @ 1; Label: 13C(6)15N(4)(R) @ 12                                                                                                             | missed K-L @ 1                   | -0.00642185 | 1519.84522 | 760.9299 | 1519.85181 | 760.933167 | 2 | 13 | 18.0577 | 4.38  |
| 8 | 55.19 | 57.25 | 70.0 NET1_FlexIII  | 99.0 QPQPVELVLEDLQDGDVR              | Label: 13C(6)15N(4)(R) @ 19                                                                                                                                         |                                  | 0.034016    | 2172.16333 | 1087.089 | 2172.13013 | 1087.07239 | 2 | 15 | 17.0042 | 4.38  |
| 8 | 55.19 | 57.25 | 70.0 NET1_FlexIII  | 99.0 QPQPVELVLEDLQDGDVR              | Label: 13C(6)15N(4)(R) @ 19                                                                                                                                         |                                  | -0.00199676 | 2172.12817 | 725.05   | 2172.13013 | 725.050659 | 3 | 19 | 17.0507 | 4.38  |
| 8 | 55.19 | 57.25 | 70.0 NET1_FlexIII  | 99.0 QPQPVELVLEDLQDGDVR              |                                                                                                                                                                     |                                  | 0.00226267  | 2162.12329 | 1082.069 | 2162.12183 | 1082.06824 | 2 | 17 | 17.1831 | 4.38  |
| 8 | 55.19 | 57.25 | 70.0 NET1_FlexIII  | 99.0 QPQPVELVLEDLQDGDVR              | Label: 13C(6)15N(4)(R) @ 19                                                                                                                                         |                                  | -0.00162846 | 2172.1294  | 1087.072 | 2172.13013 | 1087.07239 | 2 | 18 | 17.2841 | 4.38  |
| 8 | 55.19 | 57.25 | 70.0 NET1_FlexIII  | 99.0 QPQPVELVLEDLQDGDVR              | Label: 13C(6)15N(4)(R) @ 19                                                                                                                                         |                                  | -0.00199676 | 2172.12817 | 725.05   | 2172.13013 | 725.050659 | 3 | 17 | 17.3092 | 4.38  |
| 8 | 55.19 | 57.25 | 70.0 NET1_FlexIII  | 99.0 QPQPVELVLEDLQDGDVR              | Deamidated(Q) @ 6; Label: 13C(6)15N(4)(R) @ 19                                                                                                                      |                                  | 0.00095976  | 2173.12329 | 1087.569 | 2173.11426 | 1087.56433 | 2 | 14 | 17.556  | 4.38  |
| 8 | 55.19 | 57.25 | 70.0 NET1_FlexIII  | 99.0 QPQPVELVLEDLQDGDVR              | Gln->pyro-Glu @ N-term; Label: 13C(6)15N(4)(R) @ 19                                                                                                                 |                                  | 0.00077929  | 2155.10327 | 1078.559 | 2155.10352 | 1078.55908 | 2 | 22 | 17.951  | 4.38  |
| 8 | 55.19 | 57.25 | 70.0 NET1_FlexIII  | 99.0 QPQPVELVLEDLQDGDVR              | Label: 13C(6)15N(4)(R) @ 19                                                                                                                                         |                                  | 8.05E-05    | 2172.1294  | 1087.072 | 2172.13013 | 1087.07239 | 2 | 16 | 18.0353 | 4.38  |
| 8 | 55.19 | 57.25 | 70.0 NET1_FlexIII  | 99.0 QPQPVELVLEDLQDGDVR              | Gln->pyro-Glu @ N-term; Label: 13C(6)15N(4)(R) @ 19                                                                                                                 |                                  | 0.00077929  | 2155.10327 | 1078.559 | 2155.10352 | 1078.55908 | 2 | 17 | 18.4775 | 4.38  |
| 8 | 55.19 | 57.25 | 70.0 NET1_FlexIII  | 99.0 QPQPVELVLEDLQDGDVR              | Gln->pyro-Glu @ N-term; Label: 13C(6)15N(4)(R) @ 19                                                                                                                 |                                  | 0.00077929  | 2155.10327 | 1078.559 | 2155.10352 | 1078.55908 | 2 | 12 | 19.019  | 4.38  |
| 8 | 55.19 | 57.25 | 70.0 NET1_FlexIII  | 99.0 RKETLVYPTFLYK                   | Label: 13C(6)15N(4)(R) @ 1; Label: 13C(6)15N(2)(K) @ 2; Label: 13C(6)15N(2)(K) @ 13                                                                                 | missed R-K @ 1; missed K-E @ 2   | -0.0115824  | 1682.9491  | 561.9903 | 1682.96057 | 561.994141 | 3 | 13 | 14.9649 | 4.38  |
| 8 | 55.19 | 57.25 | 70.0 NET1_FlexIII  | 99.0 RQEAIVEMSR                      | Label: 13C(6)15N(4)(R) @ 1; Label: 13C(6)15N(4)(R) @ 10                                                                                                             | missed R-Q @ 1                   | -0.00436622 | 1301.62573 | 651.8201 | 1301.63013 | 651.822327 | 2 | 16 | 12.7614 | 4.38  |
| 8 | 55.19 | 57.25 | 70.0 NET1_FlexIII  | 99.0 RQEAIVEMSR                      | Label: 13C(6)15N(4)(R) @ 1; Label: 13C(6)15N(4)(R) @ 10                                                                                                             | missed R-Q @ 1                   | -0.0104108  | 1301.61963 | 434.8805 | 1301.63013 | 434.883972 | 3 | 12 | 13.0096 | 4.38  |
| 8 | 55.19 | 57.25 | 70.0 NET1_FlexIII  | 99.0 RQEAIVEMSR                      | Label: 13C(6)15N(4)(R) @ 1; Label: 13C(6)15N(4)(R) @ 10                                                                                                             | missed R-Q @ 1                   | -0.00436622 | 1301.62573 | 651.8201 | 1301.63013 | 651.822327 | 2 | 16 | 13.0351 | 4.38  |
| 8 | 55.19 | 57.25 | 70.0 NET1_FlexIII  | 99.0 RSSALWSEMLDITMK                 | Label: 13C(6)15N(4)(R) @ 1; Label: 13C(6)15N(2)(K) @ 15                                                                                                             | missed R-S @ 1                   | 0.00149075  | 1784.89343 | 893.454  | 1784.89197 | 893.453247 | 2 | 17 | 17.4426 | 4.38  |
| 8 | 55.19 | 57.25 | 70.0 NET1_FlexIII  | 99.0 SSALWSEMLDITMK                  | Label: 13C(6)15N(2)(K) @ 14                                                                                                                                         |                                  | 0.0026289   | 1618.78528 | 810.3999 | 1618.78259 | 810.39856  | 2 | 15 | 17.6102 | 4.38  |
| 8 | 55.19 | 57.25 | 70.0 NET1_FlexIII  | 99.0 SSALWSEMLDITMK                  | Label: 13C(6)15N(2)(K) @ 14                                                                                                                                         |                                  | 0.0001875   | 1618.78284 | 810.3987 | 1618.78259 | 810.39856  | 2 | 18 | 17.8832 | 4.38  |
| 8 | 55.19 | 57.25 | 70.0 NET1_FlexIII  | 99.0 VLLCHGELR                       | Propionamide(C) @ 4; Label: 13C(6)15N(4)(R) @ 9                                                                                                                     |                                  | 0.00014448  | 1119.60999 | 374.2106 | 1119.60986 | 374.210541 | 3 | 8  | 13.2645 | 4.38  |
| 8 | 55.19 | 57.25 | 70.0 NET1_FlexIII  | 99.0 YPTFLYK                         | Label: 13C(6)15N(2)(K) @ 7                                                                                                                                          | cleaved V-Y @ N-term             | 0.00057017  | 938.499878 | 470.2572 | 938.499329 | 470.256928 | 2 | 9  | 15.0367 | 4.38  |
| 8 | 55.19 | 57.25 | 70.0 NET1_FlexIII  | 99.0 YPTFLYK                         | Label: 13C(6)15N(2)(K) @ 7                                                                                                                                          | cleaved V-Y @ N-term             | 0.00819955  | 938.507446 | 470.261  | 938.499329 | 470.256928 | 2 | 9  | 14.7754 | 4.38  |
| 8 | 55.19 | 57.25 | 70.0 NET1_FlexIII  | 99.0 YPTFLYK                         | Label: 13C(6)15N(2)(K) @ 7                                                                                                                                          | cleaved V-Y @ N-term             | 0.00073716  | 938.500061 | 470.2573 | 938.499329 | 470.256928 | 2 | 9  | 15.0782 | 4.38  |
| 8 | 55.19 | 57.25 | 70.0 NET1_FlexIII  | 99.0 YPTFLYK                         | Label: 13C(6)15N(2)(K) @ 7                                                                                                                                          | cleaved V-Y @ N-term             | 0.00092027  | 938.500244 | 470.2574 | 938.499329 | 470.256928 | 2 | 9  | 14.8156 | 4.38  |
| 9 | 52.97 | 54.97 | 76.9 CLIC2_FlexIII | 99.0 AGSDGESIGNCPFCOR                | Propionamide(C) @ 11; Propionamide(C) @ 14; Label: 13C(6)15N(4)(R) @ 16                                                                                             |                                  | -0.00986731 | 1791.74451 | 896.8795 | 1791.7544  | 896.88446  | 2 | 18 | 13.5215 | 20.05 |
| 9 | 52.97 | 54.97 | 76.9 CLIC2_FlexIII | 99.0 DLAPGTNPFFLVYVK                 | Label: 13C(6)15N(2)(K) @ 15                                                                                                                                         |                                  | -0.00050933 | 1652.86487 | 827.4397 | 1652.86536 | 827.439941 | 2 | 15 | 15.5491 | 20.05 |
| 9 | 52.97 | 54.97 | 76.9 CLIC2_FlexIII | 99.0 EEFTHTCPDEKIEITYANVAK           | Propionamide(C) @ 7; Label: 13C(6)15N(2)(K) @ 11; Label: 13C(6)15N(2)(K) @ 22                                                                                       | missed K-E @ 11                  | -0.0172954  | 2654.19702 | 885.7396 | 2654.21411 | 885.7453   | 3 | 23 | 13.5767 | 20.05 |
| 9 | 52.97 | 54.97 | 76.9 CLIC2_FlexIII | 99.0 EIENTYANVAK                     | Label: 13C(6)15N(2)(K) @ 11                                                                                                                                         |                                  | 0.00086356  | 1258.62952 | 630.322  | 1258.62854 | 630.321533 | 2 | 9  | 12.722  | 20.05 |
| 9 | 52.97 | 54.97 | 76.9 CLIC2_FlexIII | 99.0 ELKTDFIK                        | Label: 13C(6)15N(2)(K) @ 8                                                                                                                                          | missed K-T @ 3                   | 0.0005463   | 1008.58325 | 505.2989 | 1008.58264 | 505.298584 | 2 | 10 | 13.41   | 20.05 |
| 9 | 52.97 | 54.97 | 76.9 CLIC2_FlexIII | 99.0 FNVTTVDMTR                      |                                                                                                                                                                     |                                  | -0.0438014  | 1182.56592 | 592.2902 | 1182.57031 | 592.292419 | 2 | 11 | 14.204  | 20.05 |
| 9 | 52.97 | 54.97 | 76.9 CLIC2_FlexIII | 99.0 FNVTTVDMTRKPEELKDLAPGTNPFFLVYVK | Label: 13C(6)15N(4)(R) @ 10; Label: 13C(6)15N(2)(K) @ 11; Label: 13C(6)15N(2)(K) @ 16; Label: 13C(6)15N(2)(K) @ 31                                                  | missed R-K @ 10; missed K-D @ 16 | -0.0247689  | 3567.84888 | 892.9695 | 3567.87378 | 892.975708 | 4 | 11 | 15.3981 | 20.05 |
| 9 | 52.97 | 54.97 | 76.9 CLIC2_FlexIII | 99.0 FSAYIK                          | Label: 13C(6)15N(2)(K) @ 6                                                                                                                                          |                                  | 0.00119371  | 735.405884 | 368.7102 | 735.404063 | 368.709625 | 2 | 7  | 13.1996 | 20.05 |
| 9 | 52.97 | 54.97 | 76.9 CLIC2_FlexIII | 99.0 IEEFLEQTAPP                     | Label: 13C(6)15N(4)(R) @ 13                                                                                                                                         |                                  | 0.00232162  | 1551.8197  | 518.2805 | 1551.81726 | 518.279663 | 3 | 17 | 15.5536 | 20.05 |
| 9 | 52.97 | 54.97 | 76.9 CLIC2_FlexIII | 99.0 IEEFLEQTAPPYPHLSPK              | Deamidated(Q) @ 7; Label: 13C(6)15N(4)(R) @ 13; Label: 13C(6)15N(2)(K) @ 20                                                                                         | missed R-Y @ 13                  | 0.0132068   | 2383.26733 | 795.4297 | 2383.25415 | 795.425354 | 3 | 13 | 15.0861 | 20.05 |
| 9 | 52.97 | 54.97 | 76.9 CLIC2_FlexIII | 99.0 KPEELKDLAPGTNPFFLVYVK           | Label: 13C(6)15N(2)(K) @ 1; Label: 13C(6)15N(2)(K) @ 6; Label: 13C(6)15N(2)(K) @ 21                                                                                 | missed K-D @ 6                   | -0.0938281  | 2393.21167 | 599.3102 | 2393.30566 | 599.333679 | 4 | 11 | 14.691  | 20.05 |
| 9 | 52.97 | 54.97 | 76.9 CLIC2_FlexIII | 99.0 KPEELKDLAPGTNPFFLVYNKELK        | Label: 13C(6)15N(2)(K) @ 1; Label: 13C(6)15N(2)(K) @ 6; Deamidated(N) @ 13; Label: 13C(6)15N(2)(K) @ 21; Label: 13C(6)15N(2)(K) @ 6 missed K-D @ 6; missed K-E @ 21 |                                  | 0.00549463  | 2772.53101 | 694.14   | 2772.52564 | 694.138672 | 4 | 15 | 14.7907 | 20.05 |
| 9 | 52.97 | 54.97 | 76.9 CLIC2_FlexIII | 99.0 LDDYLNTPLLDEIDPDSEAEPPVSR       | Deamidated(N) @ 6                                                                                                                                                   |                                  | 0.00906299  | 2813.32129 | 1407.668 | 2813.31299 | 1407.66382 | 2 | 15 | 16.8023 | 20.05 |
| 9 | 52.97 | 54.97 | 76.9 CLIC2_FlexIII | 99.0 LFLDGDQLTADCSLLPK               | Propionamide(C) @ 13; Label: 13C(6)15N(2)(K) @ 18                                                                                                                   |                                  | -0.00052644 | 2040.06946 | 1021.042 | 2040.06934 | 1021.04193 | 2 | 22 | 16.8562 | 20.05 |
| 9 | 52.97 | 54.97 | 76.9 CLIC2_FlexIII | 99.0 LFMILWLK                        | Label: 13C(6)15N(2)(K) @ 8                                                                                                                                          |                                  | 0.00220277  | 1070.64648 | 536.3305 | 1070.64417 | 536.329346 | 2 | 11 | 17.9177 | 20.05 |
| 9 | 52.97 | 54.97 | 76.9 CLIC2_FlexIII | 99.0 RLDLYLNTPLLDEIDPDSEAEPPVSR      | Label: 13C(6)15N(4)(R) @ 1; Label: 13C(6)15N(4)(R) @ 26                                                                                                             | missed R-L @ 1                   | -0.0205994  | 2988.42603 | 997.1493 | 2988.44678 | 997.156189 | 3 | 17 | 18.6915 | 20.05 |
| 9 | 52.97 | 54.97 | 76.9 CLIC2_FlexIII | 99.0 RLDLYLNTPLLDEIDPDSEAEPPVSR      | Label: 13C(6)15N(4)(R) @ 1; Label: 13C(6)15N(4)(R) @ 26; Label: 13C(6)15N(4)(R) @ 27                                                                                | missed R-L @ 1; missed R-R @ 26  | 0.00963628  | 3154.58543 | 1052.529 | 3154.55615 | 1052.526   | 3 | 12 | 15.9817 | 20.05 |
| 9 | 52.97 | 54.97 | 76.9 CLIC2_FlexIII | 99.0 RLFLDGDQLTADCSLLPK              | Label: 13C(6)15N(4)(R) @ 1; Deamidated(Q) @ 8; Propionamide(C) @ 14; Label: 13C(6)15N(2)(K) @ 19                                                                    | missed R-L @ 1                   | 0.00518528  | 2207.16797 | 736.7299 | 2207.1626  | 736.728149 | 3 | 17 | 16.2131 | 20.05 |
| 9 | 52.97 | 54.97 | 76.9 CLIC2_FlexIII | 99.0 SLKFEK                          | Label: 13C(6)15N(2)(K) @ 4; Label: 13C(6)15N(2)(K) @ 7                                                                                                              | missed K-E @ 4                   | 0.00066368  | 879.540649 | 440.7776 | 879.540039 | 440.777313 | 2 | 10 | 13.4513 | 20.05 |
| 9 | 52.97 | 54.97 | 76.9 CLIC2_FlexIII | 99.0 TDFIKIEEFLEQTAPP                | Label: 13C(6)15N(2)(K) @ 5; Label: 13C(6)15N(4)(R) @ 18                                                                                                             | missed K-I @ 5                   | -0.0098622  | 2164.14331 | 1083.079 | 2164.15356 | 1083.08398 | 2 | 14 | 18.4315 | 20.05 |
| 9 | 52.97 | 54.97 | 76.9 CLIC2_FlexIII | 99.0 TDFIKIEEFLEQTAPPYPHLSPK         | Label: 13C(6)15N(2)(K) @ 5; Label: 13C(6)15N(4)(R) @ 18; Label: 13C(6)15N(2)(K) @ 25                                                                                | missed K-I @ 5; missed R-Y @ 18  | 0.00829004  | 2994.6145  | 599.9302 | 2994.60645 | 599.928589 | 5 | 11 | 17.1658 | 20.05 |
| 9 | 52.97 | 54.97 | 76.9 CLIC2_FlexIII | 99.0 YKESFDVGCNLFK                   | Label: 13C(6)15N(2)(K) @ 2; Propionamide(C) @ 9; Label: 13C(6)15N(2)(K) @ 14                                                                                        | missed K-E @ 2                   | -0.00621221 | 1706.82471 | 854.4196 | 1706.83093 | 854.42273  | 2 | 23 | 14.8649 | 20.05 |
| 9 | 52.97 | 54.97 | 76.9 CLIC2_FlexIII | 99.0 YLHNAYAR                        | Label: 13C(6)15N(4)(R) @ 8                                                                                                                                          |                                  | 0.00154042  | 1016.50842 | 339.8434 | 1016.50671 | 339.842865 | 3 | 8  | 11.578  | 20.05 |
| 9 | 52.97 | 54.97 | 76.9 CLIC2_FlexIII | 99.0 YLHNAYAREEFTHTCPEDKIEITYANVAK   | Deamidated(N) @ 4; Label: 13C(6)15N(4)(R) @ 8; Propionamide(C) @ 15; Label: 13C(6)15N(2)(K) @ 19; Label: 13C(6)15N(2)(K) @ 30                                       | missed R-E @ 8; missed K-E @ 19  | 0.0345656   | 3653.729   | 914.4395 | 3653.69434 | 914.430847 | 4 | 12 | 13.6962 | 20.05 |
| 9 | 52.97 | 54.97 | 76.9 CLIC2_FlexIII | 99.0 YPHLSPK                         | Label: 13C(6)15N(2)(K) @ 7                                                                                                                                          |                                  | 0.00078716  | 848.464478 | 425.2395 | 848.463562 | 425.239075 | 2 | 10 | 12.0782 | 20.05 |
| 9 | 52.97 | 54.97 | 76.9 CLIC2_FlexIII | 99.0 YRDFDIPAEFSGVWR                 | Label: 13C(6)15N(4)(R) @ 2; Label: 13C(6)15N(4)(R) @ 15                                                                                                             | missed R-D @ 2                   | -0.00236654 | 1876.8988  | 626.6402 | 1876.90112 | 626.640991 | 3 | 17 | 16.1674 | 20.05 |
| 9 | 52.97 | 54.97 | 76.9 CLIC2_FlexIII | 99.0 DLAPGTNPFFLVYVK                 | Label: 13C(6)15N(2)(K) @ 15                                                                                                                                         |                                  | 0.00205414  | 1652.86743 | 827.441  | 1652.86536 | 827.439941 | 2 | 13 | 15.8204 | 20.05 |
| 9 | 52.97 | 54.97 | 76.9 CLIC2_FlexIII | 99.0 EEFTHTCPEDKIEITYANVAK           | Propionamide(C) @ 7; Label: 13C(6)15N(2)(K) @ 11; Label: 13C(6)15N(2)(K) @ 22                                                                                       | missed K-E @ 11                  | -0.00286986 | 2654.21143 | 664.5601 | 2654.21411 | 664.560791 | 4 | 12 | 13.5707 | 20.05 |
| 9 | 52.97 | 54.97 | 76.9 CLIC2_FlexIII | 99.0 EEFTHTCPEDKIEITYANVAK           | Propionamide(C) @ 7; Label: 13C(6)15N(2)(K) @ 11; Deamidated(N) @ 15; Label: 13C(6)15N(2)(K) @ 22                                                                   | missed K-E @ 11                  | 0.0243001   | 2655.22339 | 1328.619 | 2655.19824 | 1328.60632 | 2 | 11 | 13.6266 | 20.05 |
| 9 | 52.97 | 54.97 | 76.9 CLIC2_FlexIII | 99.0 FNVTTVDMTR                      | Label: 13C(6)15N(4)(R) @ 10                                                                                                                                         |                                  | 0.00038846  | 1192.5791  | 597.2968 | 1192.57861 | 597.29657  | 2 | 12 | 14.1694 | 20.05 |
| 9 | 52.97 | 54.97 | 76.9 CLIC2_FlexIII | 99.0 FSAYIK                          |                                                                                                                                                                     |                                  | -0.0033869  | 727.387085 | 364.7008 | 727.390503 | 364.702515 | 2 | 7  | 13.2611 | 20.05 |
| 9 | 52.97 | 54.97 | 76.9 CLIC2_FlexIII | 99.0 IEEFLEQTAPP                     | Deamidated(Q) @ 7; Label: 13C(6)15N(4)(R) @ 13                                                                                                                      |                                  | 0.00378606  | 1552.80505 | 777.4098 | 1552.80127 | 777.407898 | 2 | 11 | 15.5298 | 20.05 |
| 9 | 52.97 | 54.97 | 76.9 CLIC2_FlexIII | 99.0 KPEELKDLAPGTNPFFLVYVK           | Label: 13C(6)15N(2)(K) @ 1; Label: 13C(6)15N(2)(K) @ 6; Label: 13C                                                                                                  |                                  |             |            |          |            |            |   |    |         |       |

|    |       |       |      |               |      |                                |                                                                                                          |                                 |             |            |          |            |            |   |    |         |       |
|----|-------|-------|------|---------------|------|--------------------------------|----------------------------------------------------------------------------------------------------------|---------------------------------|-------------|------------|----------|------------|------------|---|----|---------|-------|
| 9  | 52.97 | 54.97 | 76.9 | CLIC2_FlexIII | 99.0 | RLDDYLNTPLLDEIDPDSAAEPPVSR     | Label: 13C(6)15N(4)(R) @ 1; Deamidated(N) @ 7; Label: 13C(6)15N(4)(R) @ 26                               | missed R-L @ 1                  | 0.0196958   | 2989.45044 | 748.3699 | 2989.43066 | 748.364929 | 4 | 11 | 15.7024 | 20.05 |
| 9  | 52.97 | 54.97 | 76.9 | CLIC2_FlexIII | 99.0 | RLDDYLNTPLLDEIDPDSAAEPPVSR     | Label: 13C(6)15N(4)(R) @ 1; Deamidated(N) @ 7; Label: 13C(6)15N(4)(R) @ 26                               | missed R-L @ 1                  | 0.01528     | 2989.44605 | 997.4893 | 2989.43066 | 997.484192 | 3 | 18 | 16.2412 | 20.05 |
| 9  | 52.97 | 54.97 | 76.9 | CLIC2_FlexIII | 99.0 | RLDDYLNTPLLDEIDPDSAAEPPVSR     | Label: 13C(6)15N(4)(R) @ 1; Label: 13C(6)15N(4)(R) @ 26                                                  | missed R-L @ 1                  | 0.00371376  | 2989.45044 | 748.1199 | 2988.44678 | 748.118958 | 4 | 23 | 16.3242 | 20.05 |
| 9  | 52.97 | 54.97 | 76.9 | CLIC2_FlexIII | 99.0 | RLDDYLNTPLLDEIDPDSAAEPPVSR     | Label: 13C(6)15N(4)(R) @ 1; Deamidated(N) @ 7; Label: 13C(6)15N(4)(R) @ 26                               | missed R-L @ 1                  | 0.0108642   | 2989.44141 | 1495.728 | 2989.43066 | 1495.72266 | 2 | 22 | 16.4066 | 20.05 |
| 9  | 52.97 | 54.97 | 76.9 | CLIC2_FlexIII | 99.0 | RLDDYLNTPLLDEIDPDSAAEPPVSR     | Label: 13C(6)15N(4)(R) @ 1; Label: 13C(6)15N(4)(R) @ 26                                                  | missed R-L @ 1                  | 0.0182003   | 2988.46509 | 598.7003 | 2988.44678 | 598.696594 | 5 | 15 | 16.4956 | 20.05 |
| 9  | 52.97 | 54.97 | 76.9 | CLIC2_FlexIII | 99.0 | RLDDYLNTPLLDEIDPDSAAEPPVSR     | Label: 13C(6)15N(4)(R) @ 1; Deamidated(N) @ 7; Label: 13C(6)15N(4)(R) @ 26                               | missed R-L @ 1                  | 0.01528     | 2989.44605 | 997.4893 | 2989.43066 | 997.484192 | 3 | 20 | 16.5076 | 20.05 |
| 9  | 52.97 | 54.97 | 76.9 | CLIC2_FlexIII | 99.0 | RLDDYLNTPLLDEIDPDSAAEPPVSR     | Label: 13C(6)15N(4)(R) @ 1; Deamidated(N) @ 7; Label: 13C(6)15N(4)(R) @ 26                               | missed R-L @ 1                  | 0.01528     | 2989.44605 | 997.4893 | 2989.43066 | 997.484192 | 3 | 14 | 16.7731 | 20.05 |
| 9  | 52.97 | 54.97 | 76.9 | CLIC2_FlexIII | 99.0 | RLDDYLNTPLLDEIDPDSAAEPPVSR     | Label: 13C(6)15N(4)(R) @ 1; Deamidated(N) @ 7; Label: 13C(6)15N(4)(R) @ 26                               | missed R-L @ 1                  | 0.01528     | 2989.44605 | 997.4893 | 2989.43066 | 997.484192 | 3 | 16 | 17.0388 | 20.05 |
| 9  | 52.97 | 54.97 | 76.9 | CLIC2_FlexIII | 99.0 | RLDDYLNTPLLDEIDPDSAAEPPVSR     | Label: 13C(6)15N(4)(R) @ 1; Label: 13C(6)15N(4)(R) @ 26                                                  | missed R-L @ 1                  | 0.01528     | 2989.44605 | 997.4893 | 2989.43066 | 997.484192 | 3 | 15 | 17.6171 | 20.05 |
| 9  | 52.97 | 54.97 | 76.9 | CLIC2_FlexIII | 99.0 | RLDDYLNTPLLDEIDPDSAAEPPVSR     | Label: 13C(6)15N(4)(R) @ 1; Label: 13C(6)15N(4)(R) @ 26                                                  | missed R-L @ 1                  | 0.0092467   | 2988.45581 | 997.1592 | 2988.44678 | 997.156189 | 3 | 23 | 17.6764 | 20.05 |
| 9  | 52.97 | 54.97 | 76.9 | CLIC2_FlexIII | 99.0 | RLDDYLNTPLLDEIDPDSAAEPPVSR     | Label: 13C(6)15N(4)(R) @ 1; Label: 13C(6)15N(4)(R) @ 26                                                  | missed R-L @ 1                  | 0.0092467   | 2988.45581 | 997.1592 | 2988.44678 | 997.156189 | 3 | 21 | 18.0087 | 20.05 |
| 9  | 52.97 | 54.97 | 76.9 | CLIC2_FlexIII | 99.0 | RLDDYLNTPLLDEIDPDSAAEPPVSR     | Label: 13C(6)15N(4)(R) @ 1; Deamidated(N) @ 7; Label: 13C(6)15N(4)(R) @ 26                               | missed R-L @ 1                  | 0.01528     | 2989.44605 | 997.4893 | 2989.43066 | 997.484192 | 3 | 16 | 18.2899 | 20.05 |
| 9  | 52.97 | 54.97 | 76.9 | CLIC2_FlexIII | 99.0 | RLDDYLNTPLLDEIDPDSAAEPPVSR     | Label: 13C(6)15N(4)(R) @ 1; Deamidated(N) @ 7; Label: 13C(6)15N(4)(R) @ 26                               | missed R-L @ 1                  | 0.01528     | 2989.44605 | 997.4893 | 2989.43066 | 997.484192 | 3 | 9  | 18.6587 | 20.05 |
| 9  | 52.97 | 54.97 | 76.9 | CLIC2_FlexIII | 99.0 | RLDDYLNTPLLDEIDPDSAAEPPVSR     | Label: 13C(6)15N(4)(R) @ 1; Label: 13C(6)15N(4)(R) @ 26                                                  | missed R-L @ 1                  | 0.0092467   | 2988.45581 | 997.1592 | 2988.44678 | 997.156189 | 3 | 10 | 19.0538 | 20.05 |
| 9  | 52.97 | 54.97 | 76.9 | CLIC2_FlexIII | 99.0 | RLDDYLNTPLLDEIDPDSAAEPPVSR     | Label: 13C(6)15N(4)(R) @ 1; Deamidated(N) @ 7; Label: 13C(6)15N(4)(R) @ 26                               | missed R-L @ 1                  | 0.01528     | 2989.44605 | 997.4893 | 2989.43066 | 997.484192 | 3 | 14 | 24.5091 | 20.05 |
| 9  | 52.97 | 54.97 | 76.9 | CLIC2_FlexIII | 99.0 | RLDDYLNTPLLDEIDPDSAAEPPVSR     | Label: 13C(6)15N(4)(R) @ 1; Label: 13C(6)15N(4)(R) @ 26                                                  | missed R-L @ 1                  | 0.0092467   | 2988.45581 | 997.1592 | 2988.44678 | 997.156189 | 3 | 20 | 24.548  | 20.05 |
| 9  | 52.97 | 54.97 | 76.9 | CLIC2_FlexIII | 99.0 | RLFLDQDLTLADCSLLPK             | Label: 13C(6)15N(4)(R) @ 1; Deamidated(Q) @ 8; Propionamide(C) @ 14; Label: 13C(6)15N(2)(K) @ 19         | missed R-L @ 1                  | 0.020789    | 2207.18335 | 1104.599 | 2207.1626  | 1104.58862 | 2 | 12 | 16.2189 | 20.05 |
| 9  | 52.97 | 54.97 | 76.9 | CLIC2_FlexIII | 99.0 | RLFLDQDLTLADCSLLPK             | Label: 13C(6)15N(4)(R) @ 1; Deamidated(Q) @ 8; Propionamide(C) @ 14; Label: 13C(6)15N(2)(K) @ 19         | missed R-L @ 1                  | 0.00518528  | 2207.16797 | 736.7299 | 2207.1626  | 736.728149 | 3 | 17 | 16.4708 | 20.05 |
| 9  | 52.97 | 54.97 | 76.9 | CLIC2_FlexIII | 99.0 | TDFIKIEEFLQTLAPPR              | Label: 13C(6)15N(2)(K) @ 5; Label: 13C(6)15N(4)(R) @ 18                                                  | missed K-I @ 5                  | -0.00542436 | 2164.14819 | 722.39   | 2164.15356 | 722.391785 | 3 | 20 | 17.7828 | 20.05 |
| 9  | 52.97 | 54.97 | 76.9 | CLIC2_FlexIII | 99.0 | TDFIKIEEFLQTLAPPR              | Label: 13C(6)15N(2)(K) @ 5; Deamidated(Q) @ 12; Label: 13C(6)15N(4)(R) @ 18                              | missed K-I @ 5                  | 0.0260393   | 2165.16333 | 1083.589 | 2165.13745 | 1083.57605 | 2 | 15 | 17.8051 | 20.05 |
| 9  | 52.97 | 54.97 | 76.9 | CLIC2_FlexIII | 99.0 | TDFIKIEEFLQTLAPPR              | Label: 13C(6)15N(2)(K) @ 5; Deamidated(Q) @ 12; Label: 13C(6)15N(4)(R) @ 18                              | missed K-I @ 5                  | 0.0348708   | 2165.17261 | 542.3004 | 2165.13745 | 542.291626 | 4 | 16 | 17.8131 | 20.05 |
| 9  | 52.97 | 54.97 | 76.9 | CLIC2_FlexIII | 99.0 | TDFIKIEEFLQTLAPPR              | Label: 13C(6)15N(2)(K) @ 5; Label: 13C(6)15N(4)(R) @ 18                                                  | missed K-I @ 5                  | 0.00116742  | 2164.15479 | 722.3922 | 2164.15356 | 722.391785 | 3 | 22 | 18.0486 | 20.05 |
| 9  | 52.97 | 54.97 | 76.9 | CLIC2_FlexIII | 99.0 | TDFIKIEEFLQTLAPPR              | Label: 13C(6)15N(2)(K) @ 5; Label: 13C(6)15N(4)(R) @ 18                                                  | missed K-I @ 5                  | 0.0100573   | 2164.16333 | 1083.089 | 2164.15356 | 1083.08398 | 2 | 24 | 18.0754 | 20.05 |
| 9  | 52.97 | 54.97 | 76.9 | CLIC2_FlexIII | 99.0 | TDFIKIEEFLQTLAPPR              | Label: 13C(6)15N(2)(K) @ 5; Deamidated(Q) @ 12; Label: 13C(6)15N(4)(R) @ 18                              | missed K-I @ 5                  | 0.0348708   | 2165.17261 | 542.3004 | 2165.13745 | 542.291626 | 4 | 16 | 18.0776 | 20.05 |
| 9  | 52.97 | 54.97 | 76.9 | CLIC2_FlexIII | 99.0 | TDFIKIEEFLQTLAPPR              | Label: 13C(6)15N(2)(K) @ 5; Deamidated(Q) @ 12; Label: 13C(6)15N(4)(R) @ 18                              | missed K-I @ 5                  | 0.0304551   | 2165.16797 | 722.7299 | 2165.13745 | 722.719788 | 3 | 15 | 18.3044 | 20.05 |
| 9  | 52.97 | 54.97 | 76.9 | CLIC2_FlexIII | 99.0 | TDFIKIEEFLQTLAPPR              | Label: 13C(6)15N(2)(K) @ 5; Deamidated(Q) @ 12; Label: 13C(6)15N(4)(R) @ 18                              | missed K-I @ 5                  | 0.0260393   | 2165.16333 | 1083.589 | 2165.13745 | 1083.57605 | 2 | 13 | 18.3297 | 20.05 |
| 9  | 52.97 | 54.97 | 76.9 | CLIC2_FlexIII | 99.0 | TDFIKIEEFLQTLAPPRYPHLSPK       | Label: 13C(6)15N(2)(K) @ 5; Deamidated(Q) @ 12; Label: 13C(6)15N(4)(R) @ 18; Label: 13C(6)15N(2)(K) @ 25 | missed K-I @ 5; missed R-Y @ 18 | 0.0487073   | 2995.63916 | 500.2805 | 2995.59058 | 500.272369 | 6 | 11 | 17.324  | 20.05 |
| 9  | 52.97 | 54.97 | 76.9 | CLIC2_FlexIII | 99.0 | TDFIKIEEFLQTLAPPRYPHLSPK       | Label: 13C(6)15N(2)(K) @ 5; Deamidated(Q) @ 12; Label: 13C(6)15N(4)(R) @ 18; Label: 13C(6)15N(2)(K) @ 25 | missed K-I @ 5; missed R-Y @ 18 | 0.0197953   | 2995.6106  | 749.9099 | 2995.59058 | 749.904907 | 4 | 17 | 17.3917 | 20.05 |
| 9  | 52.97 | 54.97 | 76.9 | CLIC2_FlexIII | 99.0 | TDFIKIEEFLQTLAPPRYPHLSPK       | Label: 13C(6)15N(2)(K) @ 5; Deamidated(Q) @ 12; Label: 13C(6)15N(4)(R) @ 18; Label: 13C(6)15N(2)(K) @ 25 | missed K-I @ 5; missed R-Y @ 18 | 0.0243331   | 2995.6145  | 600.1302 | 2995.59058 | 600.125366 | 5 | 15 | 17.4355 | 20.05 |
| 9  | 52.97 | 54.97 | 76.9 | CLIC2_FlexIII | 99.0 | TDFIKIEEFLQTLAPPRYPHLSPK       | Label: 13C(6)15N(2)(K) @ 5; Deamidated(Q) @ 12; Label: 13C(6)15N(4)(R) @ 18; Label: 13C(6)15N(2)(K) @ 25 | missed K-I @ 5; missed R-Y @ 18 | 0.03546     | 2995.62622 | 999.5493 | 2995.59058 | 999.537476 | 3 | 15 | 17.5418 | 20.05 |
| 9  | 52.97 | 54.97 | 76.9 | CLIC2_FlexIII | 99.0 | TDFIKIEEFLQTLAPPRYPHLSPK       | Label: 13C(6)15N(2)(K) @ 5; Deamidated(Q) @ 12; Label: 13C(6)15N(4)(R) @ 18; Label: 13C(6)15N(2)(K) @ 25 | missed K-I @ 5; missed R-Y @ 18 | 0.0197953   | 2995.6106  | 749.9099 | 2995.59058 | 749.904907 | 4 | 16 | 17.6696 | 20.05 |
| 9  | 52.97 | 54.97 | 76.9 | CLIC2_FlexIII | 99.0 | YKESFDVGCNLFAPK                | Label: 13C(6)15N(2)(K) @ 2; Propionamide(C) @ 9; Label: 13C(6)15N(2)(K) @ 14                             | missed K-E @ 2                  | -0.0017354  | 1706.8291  | 569.9503 | 1706.83093 | 569.950928 | 3 | 16 | 14.8355 | 20.05 |
| 9  | 52.97 | 54.97 | 76.9 | CLIC2_FlexIII | 99.0 | YKESFDVGCNLFAPK                | Label: 13C(6)15N(2)(K) @ 2; Propionamide(C) @ 9; Label: 13C(6)15N(2)(K) @ 14                             | missed K-E @ 2                  | -0.0017354  | 1706.8291  | 569.9503 | 1706.83093 | 569.950928 | 3 | 17 | 15.097  | 20.05 |
| 9  | 52.97 | 54.97 | 76.9 | CLIC2_FlexIII | 99.0 | YKESFDVGCNLFAPK                | Label: 13C(6)15N(2)(K) @ 2; Propionamide(C) @ 9; Label: 13C(6)15N(2)(K) @ 14                             | missed K-E @ 2                  | -0.00621221 | 1706.82471 | 854.4196 | 1706.83093 | 854.42273  | 2 | 18 | 15.1774 | 20.05 |
| 9  | 52.97 | 54.97 | 76.9 | CLIC2_FlexIII | 99.0 | YUHNAYAR                       | Label: 13C(6)15N(4)(R) @ 8                                                                               |                                 | 0.00245594  | 1016.50922 | 339.8437 | 1016.50671 | 339.842865 | 3 | 9  | 11.3102 | 20.05 |
| 9  | 52.97 | 54.97 | 76.9 | CLIC2_FlexIII | 99.0 | YPTFLYK                        | Label: 13C(6)15N(2)(K) @ 7                                                                               | cleaved S-Y @ N-term            | 0.00057017  | 938.499878 | 470.2572 | 938.499329 | 470.256928 | 2 | 9  | 15.0367 | 20.05 |
| 9  | 52.97 | 54.97 | 76.9 | CLIC2_FlexIII | 99.0 | YPTFLYK                        | Label: 13C(6)15N(2)(K) @ 7                                                                               | cleaved S-Y @ N-term            | 0.00819955  | 938.507446 | 470.261  | 938.499329 | 470.256928 | 2 | 9  | 14.7754 | 20.05 |
| 9  | 52.97 | 54.97 | 76.9 | CLIC2_FlexIII | 99.0 | YPTFLYK                        | Label: 13C(6)15N(2)(K) @ 7                                                                               | cleaved S-Y @ N-term            | 0.00073716  | 938.500061 | 470.2573 | 938.499329 | 470.256928 | 2 | 9  | 15.0782 | 20.05 |
| 9  | 52.97 | 54.97 | 76.9 | CLIC2_FlexIII | 99.0 | YPTFLYK                        | Label: 13C(6)15N(2)(K) @ 7                                                                               | cleaved S-Y @ N-term            | 0.00092027  | 938.500244 | 470.2574 | 938.499329 | 470.256928 | 2 | 9  | 14.8156 | 20.05 |
| 10 | 48.28 | 50.28 | 79.7 | YWHAQ_FlexIII | 99.0 | AVTEQGAELSNEER                 | Propionamide(C) @ 15; Label: 13C(6)15N(2)(K) @ 30                                                        |                                 | -0.00036022 | 1531.71106 | 766.8628 | 1531.71143 | 766.862976 | 2 | 18 | 12.1961 | 54.97 |
| 10 | 48.28 | 50.28 | 79.7 | YWHAQ_FlexIII | 99.0 | DNLTLWTSDSAGEECDAAEGAENYPTFLYK |                                                                                                          |                                 | -0.00556885 | 3388.47534 | 1130.499 | 3388.48096 | 1130.50085 | 3 | 16 | 18.9302 | 54.97 |
| 10 | 48.28 | 50.28 | 79.7 | YWHAQ_FlexIII | 99.0 | DSTMLIMQLR                     |                                                                                                          |                                 | -0.00123391 | 1188.65247 | 595.3335 | 1188.65369 | 595.334106 | 2 | 11 | 17.3048 | 54.97 |
| 10 | 48.28 | 50.28 | 79.7 | YWHAQ_FlexIII | 99.0 | EMQPTHPHPIR                    | Glu->pyro-Glu @ N-term; Label: 13C(6)15N(4)(R) @ 9                                                       |                                 | 0.00118122  | 1099.54846 | 550.7815 | 1099.54724 | 550.780884 | 2 | 12 | 12.6042 | 54.97 |
| 10 | 48.28 | 50.28 | 79.7 | YWHAQ_FlexIII | 99.0 | KEMQPTHPHPIR                   | Label: 13C(6)15N(2)(K) @ 1; Label: 13C(6)15N(4)(R) @ 10                                                  | missed K-E @ 1                  | 0.0140349   | 1253.68091 | 418.9009 | 1253.66699 | 418.896271 | 3 | 10 | 10.652  | 54.97 |
| 10 | 48.28 | 50.28 | 79.7 | YWHAQ_FlexIII | 99.0 | KQTIONSQGAQEAFDISK             | Label: 13C(6)15N(2)(K) @ 1; Label: 13C(6)15N(2)(K) @ 19                                                  | missed K-Q @ 1                  | -0.00061084 | 2158.05127 | 1080.033 | 2158.05127 | 1080.03296 | 2 | 22 | 14.0867 | 54.97 |
| 10 | 48.28 | 50.28 | 79.7 | YWHAQ_FlexIII | 99.0 | KQTIONSQGAQEAFDISK             | Label: 13C(6)15N(2)(K) @ 1; Label: 13C(6)15N(2)(K) @ 19; Label: 13C(6)15N(2)(K) @ 20                     | missed K-Q @ 1; missed K-K @ 19 | -0.00512921 | 2294.15527 | 765.7257 | 2294.1604  | 765.727417 | 3 | 24 | 13.8218 | 54.97 |
| 10 | 48.28 | 50.28 | 79.7 | YWHAQ_FlexIII | 99.0 | LAEQARYDDMTAMCKM               | Label: 13C(6)15N(4)(R) @ 7; Propionamide(C) @ 14; Label: 13C(6)15N(2)(K) @ 16                            | missed R-Y @ 7                  | -0.00366182 | 1962.85693 | 982.4357 | 1962.86047 | 982.4375   | 2 | 23 | 13.5975 | 54.97 |
| 10 | 48.28 | 50.28 | 79.7 | YWHAQ_FlexIII | 99.0 | LGLALNFVYFYEIINNPELACTLAK      | Deamidated(N) @ 16; Propionamide(C) @ 22; Label: 13C(6)15N(2)(K) @ 26                                    |                                 | 0.0168269   | 2995.56641 | 999.5294 | 2995.54956 | 999.523804 | 3 | 11 | 24.0058 | 54.97 |
| 10 | 48.28 | 50.28 | 79.7 | YWHAQ_FlexIII | 99.0 | MKGDFYR                        | Label: 13C(6)15N(2)(K) @ 2; Label: 13C(6)15N(4)(R) @ 7                                                   | missed K-G @ 2                  | -0.00028609 | 933.449463 | 467.732  | 933.449768 | 467.732147 | 2 | 9  | 12.3967 | 54.97 |
| 10 | 48.28 | 50.28 | 79.7 | YWHAQ_FlexIII | 99.0 | NLLSVAYK                       | Label: 13C(6)15N(2)(K) @ 8                                                                               |                                 | -0.00456647 | 914.5271   | 458.2708 | 914.531677 | 458.273102 | 2 | 8  | 27.6399 | 54.97 |
| 10 | 48.28 | 50.28 | 79.7 | YWHAQ_FlexIII | 99.0 | QTDIONSQGAQEAFDISK             | Label: 13C(6)15N(2)(K) @ 18                                                                              |                                 | -0.0180044  | 2021.92346 |          |            |            |   |    |         |       |

|    |       |       |                    |                                     |                                                                                                       |                                 |             |            |          |            |            |   |    |         |       |
|----|-------|-------|--------------------|-------------------------------------|-------------------------------------------------------------------------------------------------------|---------------------------------|-------------|------------|----------|------------|------------|---|----|---------|-------|
| 10 | 48.28 | 50.28 | 79.7 YWHAQ_FlexIII | 99.0 AVTEQGAELSNEER                 | Label: 13C(6)15N(4)(R)@ 14                                                                            |                                 | 0.0057486   | 1541.72546 | 771.87   | 1541.71973 | 771.867127 | 2 | 12 | 18.4732 | 54.97 |
| 10 | 48.28 | 50.28 | 79.7 YWHAQ_FlexIII | 99.0 AVTEQGAELSNEER                 | Label: 13C(6)15N(4)(R)@ 14                                                                            |                                 | 0.0057486   | 1541.72546 | 771.87   | 1541.71973 | 771.867127 | 2 | 12 | 19.1589 | 54.97 |
| 10 | 48.28 | 50.28 | 79.7 YWHAQ_FlexIII | 99.0 AVTEQGAELSNEER                 | Label: 13C(6)15N(4)(R)@ 14                                                                            |                                 | 0.0057486   | 1541.72546 | 771.87   | 1541.71973 | 771.867127 | 2 | 14 | 24.7047 | 54.97 |
| 10 | 48.28 | 50.28 | 79.7 YWHAQ_FlexIII | 99.0 AVTEQGAELSNEER                 | Label: 13C(6)15N(4)(R)@ 14                                                                            |                                 | -0.0027963  | 1541.71692 | 771.8657 | 1541.71973 | 771.867127 | 2 | 10 | 25.082  | 54.97 |
| 10 | 48.28 | 50.28 | 79.7 YWHAQ_FlexIII | 99.0 AVTEQGAELSNEER                 | Label: 13C(6)15N(4)(R)@ 14                                                                            |                                 | -0.0142709  | 1541.70544 | 771.86   | 1541.71973 | 771.867127 | 2 | 12 | 25.3379 | 54.97 |
| 10 | 48.28 | 50.28 | 79.7 YWHAQ_FlexIII | 99.0 AVTEQGAELSNEER                 | Deamidated(Q) @5; Label: 13C(6)15N(4)(R)@ 14                                                          |                                 | 0.0217304   | 1542.72546 | 772.37   | 1542.70374 | 772.359131 | 2 | 9  | 25.5992 | 54.97 |
| 10 | 48.28 | 50.28 | 79.7 YWHAQ_FlexIII | 99.0 AVTEQGAELSNEER                 | Label: 13C(6)15N(4)(R)@ 14                                                                            |                                 | -0.0169767  | 1541.71802 | 771.8663 | 1541.71973 | 771.867127 | 2 | 8  | 26.1023 | 54.97 |
| 10 | 48.28 | 50.28 | 79.7 YWHAQ_FlexIII | 99.0 AVTEQGAELSNEER                 | Label: 13C(6)15N(4)(R)@ 14                                                                            |                                 | -0.0142709  | 1541.70544 | 771.86   | 1541.71973 | 771.867127 | 2 | 7  | 27.3918 | 54.97 |
| 10 | 48.28 | 50.28 | 79.7 YWHAQ_FlexIII | 99.0 AVTEQGAELSNEER                 | Deamidated(Q) @5; Label: 13C(6)15N(4)(R)@ 14                                                          |                                 | 0.0217304   | 1542.72546 | 772.37   | 1542.70374 | 772.359131 | 2 | 12 | 12.9267 | 54.97 |
| 10 | 48.28 | 50.28 | 79.7 YWHAQ_FlexIII | 99.0 AVTEQGAELSNEER                 | Label: 13C(6)15N(4)(R)@ 14                                                                            |                                 | 0.0057486   | 1541.72546 | 771.87   | 1541.71973 | 771.867127 | 2 | 7  | 25.8514 | 54.97 |
| 10 | 48.28 | 50.28 | 79.7 YWHAQ_FlexIII | 99.0 AVTEQGAELSNEER                 | Label: 13C(6)15N(4)(R)@ 14                                                                            |                                 | -0.00206388 | 1541.71765 | 771.8661 | 1541.71973 | 771.867127 | 2 | 6  | 27.1376 | 54.97 |
| 10 | 48.28 | 50.28 | 79.7 YWHAQ_FlexIII | 99.0 AVTEQGAELSNEER                 | Label: 13C(6)15N(4)(R)@ 14                                                                            |                                 | -0.00181974 | 1541.7179  | 771.8662 | 1541.71973 | 771.867127 | 2 | 6  | 27.9084 | 54.97 |
| 10 | 48.28 | 50.28 | 79.7 YWHAQ_FlexIII | 99.0 AVTEQGAELSNEER                 | Label: 13C(6)15N(4)(R)@ 14                                                                            |                                 | 0.00125665  | 1541.7207  | 514.9142 | 1541.71973 | 514.913818 | 3 | 11 | 11.5517 | 54.97 |
| 10 | 48.28 | 50.28 | 79.7 YWHAQ_FlexIII | 99.0 AVTEQGAELSNEER                 | Label: 13C(6)15N(4)(R)@ 14                                                                            |                                 | 0.0057486   | 1541.72546 | 771.87   | 1541.71973 | 771.867127 | 2 | 6  | 26.3663 | 54.97 |
| 10 | 48.28 | 50.28 | 79.7 YWHAQ_FlexIII | 99.0 AVTEQGAELSNEER                 | Label: 13C(6)15N(4)(R)@ 14                                                                            |                                 | 0.0057486   | 1541.72546 | 771.87   | 1541.71973 | 771.867127 | 2 | 6  | 26.6244 | 54.97 |
| 10 | 48.28 | 50.28 | 79.7 YWHAQ_FlexIII | 99.0 DNLTLWTSDSAGEECDAAEGAENYPTFLYK | Propionamide(C) @ 15; Label: 13C(6)15N(2)(K)@ 30                                                      |                                 | 0.00248777  | 3388.48413 | 1130.502 | 3388.48096 | 1130.50085 | 3 | 19 | 17.8414 | 54.97 |
| 10 | 48.28 | 50.28 | 79.7 YWHAQ_FlexIII | 99.0 DNLTLWTSDSAGEECDAAEGAENYPTFLYK | Propionamide(C) @ 15; Deamidated(N) @ 23; Label: 13C(6)15N(2)(K)@ 30                                  |                                 | 0.00028111  | 3389.46509 | 1130.829 | 3389.46484 | 1130.82886 | 3 | 13 | 18.5733 | 54.97 |
| 10 | 48.28 | 50.28 | 79.7 YWHAQ_FlexIII | 99.0 DNLTLWTSDSAGEECDAAEGAENYPTFLYK | Propionamide(C) @ 15; Label: 13C(6)15N(2)(K)@ 30                                                      |                                 | -0.00556885 | 3388.47534 | 1130.499 | 3388.48096 | 1130.50085 | 3 | 16 | 18.6717 | 54.97 |
| 10 | 48.28 | 50.28 | 79.7 YWHAQ_FlexIII | 99.0 DNLTLWTSDSAGEECDAAEGAENYPTFLYK | Propionamide(C) @ 15; Deamidated(N) @ 23; Label: 13C(6)15N(2)(K)@ 30                                  |                                 | 0.00028111  | 3389.46509 | 1130.829 | 3389.46484 | 1130.82886 | 3 | 13 | 18.3176 | 54.97 |
| 10 | 48.28 | 50.28 | 79.7 YWHAQ_FlexIII | 99.0 DNLTLWTSDSAGEECDAAEGAENYPTFLYK | Propionamide(C) @ 15; Deamidated(N) @ 23; Label: 13C(6)15N(2)(K)@ 30                                  |                                 | 0.00028111  | 3389.46509 | 1130.829 | 3389.46484 | 1130.82886 | 3 | 11 | 24.6957 | 54.97 |
| 10 | 48.28 | 50.28 | 79.7 YWHAQ_FlexIII | 99.0 DNLTLWTSDSAGEECDAAEGAENYPTFLYK | Deamidated(N) @ 2; Propionamide(C) @ 15; Label: 13C(6)15N(2)(K)@ 30                                   |                                 | 0.0303103   | 3389.49512 | 1130.839 | 3389.46484 | 1130.82886 | 3 | 12 | 16.7515 | 54.97 |
| 10 | 48.28 | 50.28 | 79.7 YWHAQ_FlexIII | 99.0 DNLTLWTSDSAGEECDAAEGAENYPTFLYK | Propionamide(C) @ 15; Deamidated(N) @ 23; Label: 13C(6)15N(2)(K)@ 30                                  |                                 | 0.0303103   | 3389.49512 | 1130.839 | 3389.46484 | 1130.82886 | 3 | 12 | 17.0243 | 54.97 |
| 10 | 48.28 | 50.28 | 79.7 YWHAQ_FlexIII | 99.0 DNLTLWTSDSAGEECDAAEGAENYPTFLYK | Propionamide(C) @ 15; Deamidated(N) @ 23; Label: 13C(6)15N(2)(K)@ 30                                  |                                 | 0.00028111  | 3389.46509 | 1130.829 | 3389.46484 | 1130.82886 | 3 | 12 | 17.5633 | 54.97 |
| 10 | 48.28 | 50.28 | 79.7 YWHAQ_FlexIII | 99.0 DSTLIMQLLR                     | Label: 13C(6)15N(4)(R)@ 10                                                                            |                                 | 0.00121281  | 1198.66333 | 600.3389 | 1198.66187 | 600.338257 | 2 | 11 | 17.2163 | 54.97 |
| 10 | 48.28 | 50.28 | 79.7 YWHAQ_FlexIII | 99.0 DSTLIMQLLR                     | Label: 13C(6)15N(4)(R)@ 10                                                                            |                                 | 0.00048039  | 1198.66248 | 600.3385 | 1198.66187 | 600.338257 | 2 | 11 | 17.481  | 54.97 |
| 10 | 48.28 | 50.28 | 79.7 YWHAQ_FlexIII | 99.0 EMQPTPHIR                      | Label: 13C(6)15N(4)(R)@ 9                                                                             |                                 | 0.00143295  | 1117.55933 | 559.7869 | 1117.55774 | 559.786194 | 2 | 10 | 11.4148 | 54.97 |
| 10 | 48.28 | 50.28 | 79.7 YWHAQ_FlexIII | 99.0 KQTIDNSQGAYQEAFDISKK           | Label: 13C(6)15N(2)(K)@ 1; Deamidated(Q) @ 12; Label: 13C(6)15N(2)(K)@ 19; Label: 13C(6)15N(2)(K)@ 20 | missed K-Q @ 1; missed K-K @ 19 | 0.0137212   | 2295.1582  | 766.06   | 2295.14453 | 766.05542  | 3 | 18 | 13.5577 | 54.97 |
| 10 | 48.28 | 50.28 | 79.7 YWHAQ_FlexIII | 99.0 KQTIDNSQGAYQEAFDISKK           | Label: 13C(6)15N(2)(K)@ 1; Deamidated(Q) @ 8; Label: 13C(6)15N(2)(K)@ 19; Label: 13C(6)15N(2)(K)@ 20  | missed K-Q @ 1; missed K-K @ 19 | 0.0284553   | 2295.17285 | 574.8005 | 2295.14453 | 574.793396 | 4 | 16 | 13.5988 | 54.97 |
| 10 | 48.28 | 50.28 | 79.7 YWHAQ_FlexIII | 99.0 KQTIDNSQGAYQEAFDISKK           | Label: 13C(6)15N(2)(K)@ 1; Label: 13C(6)15N(2)(K)@ 19; Label: 13C(6)15N(2)(K)@ 20                     | missed K-Q @ 1; missed K-K @ 19 | 0.0124735   | 2294.17285 | 574.5505 | 2294.1604  | 574.547424 | 4 | 12 | 24.5667 | 54.97 |
| 10 | 48.28 | 50.28 | 79.7 YWHAQ_FlexIII | 99.0 LAEQAERYDDMATCMK               | Label: 13C(6)15N(4)(R)@ 7; Propionamide(C) @ 14; Label: 13C(6)15N(2)(K)@ 16                           | missed R-Y @ 7                  | 0.00390652  | 1962.8645  | 982.4395 | 1962.86047 | 982.4375   | 2 | 23 | 13.3284 | 54.97 |
| 10 | 48.28 | 50.28 | 79.7 YWHAQ_FlexIII | 99.0 LAEQAERYDDMATCMK               | Label: 13C(6)15N(4)(R)@ 7; Propionamide(C) @ 14; Label: 13C(6)15N(2)(K)@ 16                           | missed R-Y @ 7                  | -0.0113886  | 1962.849   | 655.2903 | 1962.86047 | 655.294067 | 3 | 12 | 13.3063 | 54.97 |
| 10 | 48.28 | 50.28 | 79.7 YWHAQ_FlexIII | 99.0 NLLSVAYK                       | Label: 13C(6)15N(2)(K)@ 8                                                                             |                                 | 0.00123186  | 914.532898 | 458.2737 | 914.531677 | 458.273102 | 2 | 8  | 28.1549 | 54.97 |
| 10 | 48.28 | 50.28 | 79.7 YWHAQ_FlexIII | 99.0 NLLSVAYK                       | Label: 13C(6)15N(2)(K)@ 8                                                                             |                                 | 0.00184221  | 914.533447 | 458.274  | 914.531677 | 458.273102 | 2 | 8  | 23.6896 | 54.97 |
| 10 | 48.28 | 50.28 | 79.7 YWHAQ_FlexIII | 99.0 NLLSVAYK                       | Label: 13C(6)15N(2)(K)@ 8                                                                             |                                 | 0.0016591   | 914.533264 | 458.2739 | 914.531677 | 458.273102 | 2 | 8  | 27.8924 | 54.97 |
| 10 | 48.28 | 50.28 | 79.7 YWHAQ_FlexIII | 99.0 NLLSVAYK                       | Label: 13C(6)15N(2)(K)@ 8                                                                             |                                 | 0.0002553   | 914.53186  | 458.2732 | 914.531677 | 458.273102 | 2 | 9  | 14.7116 | 54.97 |
| 10 | 48.28 | 50.28 | 79.7 YWHAQ_FlexIII | 99.0 NLLSVAYK                       | Label: 13C(6)15N(2)(K)@ 8                                                                             |                                 | -0.00133161 | 914.530273 | 458.2724 | 914.531677 | 458.273102 | 2 | 9  | 18.5353 | 54.97 |
| 10 | 48.28 | 50.28 | 79.7 YWHAQ_FlexIII | 99.0 NLLSVAYK                       | Label: 13C(6)15N(2)(K)@ 8                                                                             |                                 | 0.00184221  | 914.533447 | 458.274  | 914.531677 | 458.273102 | 2 | 7  | 23.9454 | 54.97 |
| 10 | 48.28 | 50.28 | 79.7 YWHAQ_FlexIII | 99.0 NLLSVAYK                       | Label: 13C(6)15N(2)(K)@ 8                                                                             |                                 | -0.00456647 | 914.5271   | 458.2708 | 914.531677 | 458.273102 | 2 | 8  | 24.2029 | 54.97 |
| 10 | 48.28 | 50.28 | 79.7 YWHAQ_FlexIII | 99.0 NLLSVAYK                       | Label: 13C(6)15N(2)(K)@ 8                                                                             |                                 | -0.00456647 | 914.5271   | 458.2708 | 914.531677 | 458.273102 | 2 | 7  | 26.6096 | 54.97 |
| 10 | 48.28 | 50.28 | 79.7 YWHAQ_FlexIII | 99.0 NLLSVAYK                       | Label: 13C(6)15N(2)(K)@ 8                                                                             |                                 | 0.00184221  | 914.533447 | 458.274  | 914.531677 | 458.273102 | 2 | 7  | 26.8679 | 54.97 |
| 10 | 48.28 | 50.28 | 79.7 YWHAQ_FlexIII | 99.0 NLLSVAYK                       | Label: 13C(6)15N(2)(K)@ 8                                                                             |                                 | 0.001476    | 914.533081 | 458.2738 | 914.531677 | 458.273102 | 2 | 7  | 27.126  | 54.97 |
| 10 | 48.28 | 50.28 | 79.7 YWHAQ_FlexIII | 99.0 NLLSVAYK                       | Label: 13C(6)15N(2)(K)@ 8                                                                             |                                 | -0.00456647 | 914.5271   | 458.2708 | 914.531677 | 458.273102 | 2 | 7  | 27.3804 | 54.97 |
| 10 | 48.28 | 50.28 | 79.7 YWHAQ_FlexIII | 99.0 NLLSVAYK                       | Label: 13C(6)15N(2)(K)@ 8                                                                             |                                 | 0.00184221  | 914.533447 | 458.274  | 914.531677 | 458.273102 | 2 | 7  | 28.4121 | 54.97 |
| 10 | 48.28 | 50.28 | 79.7 YWHAQ_FlexIII | 99.0 NLLSVAYK                       | Label: 13C(6)15N(2)(K)@ 8                                                                             |                                 | 0.00104875  | 914.532654 | 458.2736 | 914.531677 | 458.273102 | 2 | 7  | 28.9184 | 54.97 |
| 10 | 48.28 | 50.28 | 79.7 YWHAQ_FlexIII | 99.0 NLLSVAYK                       | Label: 13C(6)15N(2)(K)@ 8                                                                             |                                 | -0.00035506 | 914.53125  | 458.2729 | 914.531677 | 458.273102 | 2 | 8  | 19.7399 | 54.97 |
| 10 | 48.28 | 50.28 | 79.7 YWHAQ_FlexIII | 99.0 NLLSVAYK                       | Label: 13C(6)15N(2)(K)@ 8                                                                             |                                 | -0.00456647 | 914.5271   | 458.2708 | 914.531677 | 458.273102 | 2 | 7  | 23.3484 | 54.97 |
| 10 | 48.28 | 50.28 | 79.7 YWHAQ_FlexIII | 99.0 NLLSVAYK                       | Label: 13C(6)15N(2)(K)@ 8                                                                             |                                 | 0.0004384   | 914.532044 | 458.2733 | 914.531677 | 458.273102 | 2 | 9  | 14.9808 | 54.97 |
| 10 | 48.28 | 50.28 | 79.7 YWHAQ_FlexIII | 99.0 NLLSVAYK                       | Label: 13C(6)15N(2)(K)@ 8                                                                             |                                 | -0.00456647 | 914.5271   | 458.2708 | 914.531677 | 458.273102 | 2 | 9  | 15.2523 | 54.97 |
| 10 | 48.28 | 50.28 | 79.7 YWHAQ_FlexIII | 99.0 NLLSVAYK                       | Label: 13C(6)15N(2)(K)@ 8                                                                             |                                 | -0.00456647 | 914.5271   | 458.2708 | 914.531677 | 458.273102 | 2 | 7  | 23.0686 | 54.97 |
| 10 | 48.28 | 50.28 | 79.7 YWHAQ_FlexIII | 99.0 NLLSVAYK                       | Label: 13C(6)15N(2)(K)@ 8                                                                             |                                 | -0.00456647 | 914.5271   | 458.2708 | 914.531677 | 458.273102 | 2 | 7  | 25.8794 | 54.97 |
| 10 | 48.28 | 50.28 | 79.7 YWHAQ_FlexIII | 99.0 NLLSVAYK                       | Label: 13C(6)15N(2)(K)@ 8                                                                             |                                 | 0.001476    | 914.533081 | 458.2738 | 914.531677 | 458.273102 | 2 | 7  | 26.3561 | 54.97 |
| 10 | 48.28 | 50.28 | 79.7 YWHAQ_FlexIII | 99.0 NLLSVAYK                       | Label: 13C(6)15N(2)(K)@ 8                                                                             |                                 | -0.00456647 | 914.5271   | 458.2708 | 914.531677 | 458.273102 | 2 | 9  | 16.9032 | 54.97 |
| 10 | 48.28 | 50.28 | 79.7 YWHAQ_FlexIII | 99.0 NLLSVAYK                       | Label: 13C(6)15N(2)(K)@ 8                                                                             |                                 | 0.00088254  | 914.532288 | 458.2734 | 914.531677 | 458.273102 | 2 | 7  | 22.2279 | 54.97 |
| 10 | 48.28 | 50.28 | 79.7 YWHAQ_FlexIII | 99.0 NLLSVAYK                       | Label: 13C(6)15N(2)(K)@ 8                                                                             |                                 | -0.00456647 | 914.5271   | 458.2708 | 914.531677 | 458.273102 | 2 | 6  | 28.6651 | 54.97 |
| 10 | 48.28 | 50.28 | 79.7 YWHAQ_FlexIII | 99.0 NLLSVAYK                       | Label: 13C(6)15N(2)(K)@ 8                                                                             |                                 | -0.00456647 | 914.5271   | 458.2708 | 914.531677 | 458.273102 | 2 | 7  | 20.8357 | 54.97 |
| 10 | 48.28 | 50.28 | 79.7 YWHAQ_FlexIII | 99.0 NLLSVAYK                       | Label: 13C(6)15N(2)(K)@ 8                                                                             |                                 | -0.00456647 | 914.5271   | 458.2708 | 914.531677 | 458.273102 | 2 | 7  | 20.2024 | 54.97 |
| 10 | 48.28 | 50.28 | 79.7 YWHAQ_FlexIII | 99.0 NLLSVAYK                       | Label: 13C(6)15N(2)(K)@ 8                                                                             |                                 | 0.00184221  | 914.533447 | 458.274  | 914.531677 | 458.273102 | 2 | 8  | 19.1136 | 54.97 |
| 10 | 48.28 | 50.28 | 79.7 YWHAQ_FlexIII | 99.0 QTDINSQGAYQEAFDISKK            | Label: 13C(6)15N(2)(K)@ 18; Label: 13C(6)15N(2)(K)@ 19                                                | missed K-K @ 18                 | 0.00722628  | 2158.06589 | 720.3601 | 2158.05127 | 720.357727 | 3 | 18 | 14.048  | 54.97 |
| 10 | 48.28 | 50.28 | 79.7 YWHAQ_FlexIII | 99.0 QTDINSQGAYQEAFDISKK            | Label: 13C(6)15N(2)(K)@ 18; Label: 13C(6)15N(2)(K)@ 19                                                | missed K-K @ 18                 | -0.0112673  | 2158.0398  | 720.3539 | 2158.05127 | 720.357727 | 3 | 17 | 14.3128 | 54.97 |
| 10 | 48.28 | 50.28 | 79.7 YWHAQ_FlexIII | 99.0 QTDINSQGAYQEAFDISK             |                                                                                                       |                                 |             |            |          |            |            |   |    |         |       |

|    |       |       |                    |                                   |                                                                                                 |                      |             |            |          |            |            |   |    |         |       |
|----|-------|-------|--------------------|-----------------------------------|-------------------------------------------------------------------------------------------------|----------------------|-------------|------------|----------|------------|------------|---|----|---------|-------|
| 10 | 48.28 | 50.28 | 79.7 YWHAQ_FlexIII | 99.0 TAFDEAIAELDTLNEDSYKDSLIMQLLR | Deamidated(N) @ 14; Label: 13C(6)15N(2)(K) @ 19; Label: 13C(6)15N(4)(R) @ 29                    | missed K-D @ 19      | 0.0208928   | 3333.65015 | 834.4198 | 3333.6294  | 834.414612 | 4 | 21 | 18.2539 | 54.97 |
| 10 | 48.28 | 50.28 | 79.7 YWHAQ_FlexIII | 99.0 TAFDEAIAELDTLNEDSYKDSLIMQLLR | Deamidated(N) @ 14; Label: 13C(6)15N(2)(K) @ 19; Label: 13C(6)15N(4)(R) @ 29                    | missed K-D @ 19      | 0.00609774  | 3333.63525 | 1112.219 | 3333.6294  | 1112.21704 | 3 | 20 | 18.3632 | 54.97 |
| 10 | 48.28 | 50.28 | 79.7 YWHAQ_FlexIII | 99.0 TAFDEAIAELDTLNEDSYKDSLIMQLLR | Deamidated(N) @ 14; Label: 13C(6)15N(2)(K) @ 19; Label: 13C(6)15N(4)(R) @ 29                    | missed K-D @ 19      | 0.0208928   | 3333.65015 | 834.4198 | 3333.6294  | 834.414612 | 4 | 19 | 18.515  | 54.97 |
| 10 | 48.28 | 50.28 | 79.7 YWHAQ_FlexIII | 99.0 TAFDEAIAELDTLNEDSYKDSLIMQLLR | Deamidated(N) @ 14; Label: 13C(6)15N(2)(K) @ 19; Label: 13C(6)15N(4)(R) @ 29                    | missed K-D @ 19      | 0.00609774  | 3333.63525 | 1112.219 | 3333.6294  | 1112.21704 | 3 | 19 | 18.6154 | 54.97 |
| 10 | 48.28 | 50.28 | 79.7 YWHAQ_FlexIII | 99.0 TAFDEAIAELDTLNEDSYKDSLIMQLLR | Deamidated(N) @ 14; Label: 13C(6)15N(2)(K) @ 19; Label: 13C(6)15N(4)(R) @ 29                    | missed K-D @ 19      | 0.0208928   | 3333.65015 | 834.4198 | 3333.6294  | 834.414612 | 4 | 19 | 18.7659 | 54.97 |
| 10 | 48.28 | 50.28 | 79.7 YWHAQ_FlexIII | 99.0 TAFDEAIAELDTLNEDSYKDSLIMQLLR | Deamidated(N) @ 14; Label: 13C(6)15N(2)(K) @ 19; Label: 13C(6)15N(4)(R) @ 29                    | missed K-D @ 19      | 0.00609774  | 3333.63525 | 1112.219 | 3333.6294  | 1112.21704 | 3 | 16 | 18.8764 | 54.97 |
| 10 | 48.28 | 50.28 | 79.7 YWHAQ_FlexIII | 99.0 TAFDEAIAELDTLNEDSYKDSLIMQLLR | Deamidated(N) @ 14; Label: 13C(6)15N(2)(K) @ 19; Label: 13C(6)15N(4)(R) @ 29                    | missed K-D @ 19      | 0.0208928   | 3333.65015 | 834.4198 | 3333.6294  | 834.414612 | 4 | 16 | 24.4702 | 54.97 |
| 10 | 48.28 | 50.28 | 79.7 YWHAQ_FlexIII | 99.0 TAFDEAIAELDTLNEDSYKDSLIMQLLR | Deamidated(N) @ 14; Label: 13C(6)15N(2)(K) @ 19; Label: 13C(6)15N(4)(R) @ 29                    | missed K-D @ 19      | 0.00900154  | 3333.63818 | 1112.22  | 3333.6294  | 1112.21704 | 3 | 12 | 18.1324 | 54.97 |
| 10 | 48.28 | 50.28 | 79.7 YWHAQ_FlexIII | 99.0 TAFDEAIAELDTLNEDSYKDSLIMQLLR | Deamidated(N) @ 14; Label: 13C(6)15N(2)(K) @ 19; Label: 13C(6)15N(4)(R) @ 29                    | missed K-D @ 19      | 0.00609774  | 3333.63525 | 1112.219 | 3333.6294  | 1112.21704 | 3 | 13 | 17.8326 | 54.97 |
| 10 | 48.28 | 50.28 | 79.7 YWHAQ_FlexIII | 99.0 TAFDEAIAELDTLNEDSYKDSLIMQLLR | Deamidated(N) @ 14; Label: 13C(6)15N(2)(K) @ 19; Oxidation(M) @ 25; Label: 13C(6)15N(4)(R) @ 29 | missed K-D @ 19      | 0.0375334   | 3349.66138 | 1117.561 | 3349.62427 | 1117.54871 | 3 | 11 | 18.1181 | 54.97 |
| 10 | 48.28 | 50.28 | 79.7 YWHAQ_FlexIII | 99.0 TAFDEAIAELDTLNEDSYKDSLIMQLLR | Label: 13C(6)15N(2)(K) @ 19; Label: 13C(6)15N(4)(R) @ 29                                        | missed K-D @ 19      | 0.00024778  | 3332.64526 | 1111.889 | 3332.64526 | 1111.88904 | 3 | 8  | 19.2286 | 54.97 |
| 10 | 48.28 | 50.28 | 79.7 YWHAQ_FlexIII | 99.0 TAFDEAIAELDTLNEDSYKDSLIMQLLR | Label: 13C(6)15N(2)(K) @ 19; Label: 13C(6)15N(4)(R) @ 29                                        | missed K-D @ 19      | 0.00511297  | 3332.65112 | 1111.891 | 3332.64526 | 1111.88904 | 3 | 16 | 18.0841 | 54.97 |
| 10 | 48.28 | 50.28 | 79.7 YWHAQ_FlexIII | 99.0 TAFDEAIAELDTLNEDSYKDSLIMQLLR | Label: 13C(6)15N(2)(K) @ 19; Label: 13C(6)15N(4)(R) @ 29                                        | missed K-D @ 19      | -0.00092437 | 3332.64526 | 1111.889 | 3332.64526 | 1111.88904 | 3 | 13 | 18.1186 | 54.97 |
| 10 | 48.28 | 50.28 | 79.7 YWHAQ_FlexIII | 99.0 TAFDEAIAELDTLNEDSYKDSLIMQLLR | Deamidated(N) @ 14; Label: 13C(6)15N(2)(K) @ 19; Label: 13C(6)15N(4)(R) @ 29                    | missed K-D @ 19      | 0.0345969   | 3333.66528 | 1112.229 | 3333.6294  | 1112.21704 | 3 | 11 | 18.196  | 54.97 |
| 10 | 48.28 | 50.28 | 79.7 YWHAQ_FlexIII | 99.0 TAFDEAIAELDTLNEDSYKDSLIMQLLR | Deamidated(N) @ 14; Label: 13C(6)15N(2)(K) @ 19; Label: 13C(6)15N(4)(R) @ 29                    | missed K-D @ 19      | 0.00868109  | 3333.63818 | 1112.22  | 3333.6294  | 1112.21704 | 3 | 12 | 18.0642 | 54.97 |
| 10 | 48.28 | 50.28 | 79.7 YWHAQ_FlexIII | 99.0 VISSIEOK                     | Label: 13C(6)15N(2)(K) @ 8                                                                      | missed K-D @ 19      | 0.00561491  | 910.5271   | 456.2708 | 910.521484 | 456.268036 | 2 | 9  | 12.2437 | 54.97 |
| 10 | 48.28 | 50.28 | 79.7 YWHAQ_FlexIII | 99.0 YDDMATCMK                    | Propionamide(C) @ 7; Label: 13C(6)15N(2)(K) @ 9                                                 | missed K-D @ 19      | 0.00024987  | 1155.44922 | 578.7319 | 1155.44898 | 578.731751 | 2 | 10 | 12.9762 | 54.97 |
| 10 | 48.28 | 50.28 | 79.7 YWHAQ_FlexIII | 99.0 YDDMATCMK                    | Propionamide(C) @ 7; Label: 13C(6)15N(2)(K) @ 9                                                 | missed K-D @ 19      | -0.00255774 | 1155.44653 | 578.7305 | 1155.44898 | 578.731751 | 2 | 8  | 25.7751 | 54.97 |
| 10 | 48.28 | 50.28 | 79.7 YWHAQ_FlexIII | 99.0 YDDMATCMK                    | Propionamide(C) @ 7; Label: 13C(6)15N(2)(K) @ 9                                                 | missed K-D @ 19      | -0.00255774 | 1155.44653 | 578.7305 | 1155.44898 | 578.731751 | 2 | 7  | 26.0308 | 54.97 |
| 10 | 48.28 | 50.28 | 79.7 YWHAQ_FlexIII | 99.0 YDDMATCMK                    | Propionamide(C) @ 7; Label: 13C(6)15N(2)(K) @ 9                                                 | missed K-D @ 19      | -0.00072669 | 1155.44824 | 578.7314 | 1155.44898 | 578.731751 | 2 | 6  | 26.8037 | 54.97 |
| 10 | 48.28 | 50.28 | 79.7 YWHAQ_FlexIII | 99.0 YDDMATCMK                    | Propionamide(C) @ 7; Label: 13C(6)15N(2)(K) @ 9                                                 | missed K-D @ 19      | 0.00244713  | 1155.45142 | 578.733  | 1155.44898 | 578.731751 | 2 | 8  | 25.2697 | 54.97 |
| 10 | 48.28 | 50.28 | 79.7 YWHAQ_FlexIII | 99.0 YDDMATCMK                    | Propionamide(C) @ 7; Label: 13C(6)15N(2)(K) @ 9                                                 | missed K-D @ 19      | 0.00183678  | 1155.45093 | 578.7327 | 1155.44898 | 578.731751 | 2 | 6  | 26.5496 | 54.97 |
| 10 | 48.28 | 50.28 | 79.7 YWHAQ_FlexIII | 99.0 YDDMATCMK                    | Propionamide(C) @ 7; Label: 13C(6)15N(2)(K) @ 9                                                 | missed K-D @ 19      | 0.00073815  | 1155.44971 | 578.7321 | 1155.44898 | 578.731751 | 2 | 6  | 27.0607 | 54.97 |
| 10 | 48.28 | 50.28 | 79.7 YWHAQ_FlexIII | 99.0 YDDMATCMK                    | Propionamide(C) @ 7; Label: 13C(6)15N(2)(K) @ 9                                                 | missed K-D @ 19      | -0.00255774 | 1155.44653 | 578.7305 | 1155.44898 | 578.731751 | 2 | 10 | 12.7136 | 54.97 |
| 10 | 48.28 | 50.28 | 79.7 YWHAQ_FlexIII | 99.0 YDDMATCMK                    | Propionamide(C) @ 7                                                                             | missed K-D @ 19      | -0.00835701 | 1147.42651 | 574.7205 | 1147.43481 | 574.72467  | 2 | 10 | 12.795  | 54.97 |
| 10 | 48.28 | 50.28 | 79.7 YWHAQ_FlexIII | 99.0 YDDMATCMK                    | Propionamide(C) @ 7; Label: 13C(6)15N(2)(K) @ 9                                                 | missed K-D @ 19      | -0.00255774 | 1155.44653 | 578.7305 | 1155.44898 | 578.731751 | 2 | 8  | 24.7486 | 54.97 |
| 10 | 48.28 | 50.28 | 79.7 YWHAQ_FlexIII | 99.0 YDDMATCMK                    | Propionamide(C) @ 7; Label: 13C(6)15N(2)(K) @ 9                                                 | missed K-D @ 19      | 0.00073815  | 1155.44971 | 578.7321 | 1155.44898 | 578.731751 | 2 | 7  | 25.5179 | 54.97 |
| 10 | 48.28 | 50.28 | 79.7 YWHAQ_FlexIII | 99.0 YDDMATCMK                    | Propionamide(C) @ 7; Label: 13C(6)15N(2)(K) @ 9                                                 | missed K-D @ 19      | -0.00255774 | 1155.44653 | 578.7305 | 1155.44898 | 578.731751 | 2 | 6  | 27.3211 | 54.97 |
| 10 | 48.28 | 50.28 | 79.7 YWHAQ_FlexIII | 99.0 YDDMATCMK                    | Propionamide(C) @ 7; Label: 13C(6)15N(2)(K) @ 9                                                 | missed K-D @ 19      | -0.00255774 | 1155.44653 | 578.7305 | 1155.44898 | 578.731751 | 2 | 7  | 25.0075 | 54.97 |
| 10 | 48.28 | 50.28 | 79.7 YWHAQ_FlexIII | 99.0 YLAEVACGDDR                  | Propionamide(C) @ 7; Label: 13C(6)15N(4)(R) @ 11                                                | missed K-D @ 19      | -8.63E-05   | 1291.57422 | 646.7944 | 1291.57422 | 646.794373 | 2 | 14 | 13.0042 | 54.97 |
| 10 | 48.28 | 50.28 | 79.7 YWHAQ_FlexIII | 99.0 YLAEVACGDDR                  | Propionamide(C) @ 7; Label: 13C(6)15N(4)(R) @ 11                                                | missed K-D @ 19      | 0.00027993  | 1291.57471 | 646.7946 | 1291.57422 | 646.794373 | 2 | 13 | 13.2739 | 54.97 |
| 10 | 48.28 | 50.28 | 79.7 YWHAQ_FlexIII | 99.0 YLAEVACGDDR                  | Propionamide(C) @ 7; Label: 13C(6)15N(4)(R) @ 11                                                | missed K-D @ 19      | 0.0118786   | 1291.5863  | 646.8004 | 1291.57422 | 646.794373 | 2 | 11 | 19.3099 | 54.97 |
| 10 | 48.28 | 50.28 | 79.7 YWHAQ_FlexIII | 99.0 YLAEVACGDDR                  | Propionamide(C) @ 7; Label: 13C(6)15N(4)(R) @ 11                                                | missed K-D @ 19      | -0.0081429  | 1291.56604 | 646.7903 | 1291.57422 | 646.794373 | 2 | 9  | 25.0501 | 54.97 |
| 10 | 48.28 | 50.28 | 79.7 YWHAQ_FlexIII | 99.0 YLAEVACGDDR                  | Propionamide(C) @ 7; Label: 13C(6)15N(4)(R) @ 11                                                | missed K-D @ 19      | -0.0081429  | 1291.56604 | 646.7903 | 1291.57422 | 646.794373 | 2 | 9  | 25.5839 | 54.97 |
| 10 | 48.28 | 50.28 | 79.7 YWHAQ_FlexIII | 99.0 YLAEVACGDDR                  | Propionamide(C) @ 7; Label: 13C(6)15N(4)(R) @ 11                                                | missed K-D @ 19      | -0.0081429  | 1291.56604 | 646.7903 | 1291.57422 | 646.794373 | 2 | 8  | 26.1262 | 54.97 |
| 10 | 48.28 | 50.28 | 79.7 YWHAQ_FlexIII | 99.0 YLAEVACGDDR                  | Propionamide(C) @ 7; Label: 13C(6)15N(4)(R) @ 11                                                | missed K-D @ 19      | -0.00045249 | 1291.57385 | 646.7942 | 1291.57422 | 646.794373 | 2 | 7  | 26.3876 | 54.97 |
| 10 | 48.28 | 50.28 | 79.7 YWHAQ_FlexIII | 99.0 YLAEVACGDDR                  | Propionamide(C) @ 7; Label: 13C(6)15N(4)(R) @ 11                                                | missed K-D @ 19      | 0.0118786   | 1291.5863  | 646.8004 | 1291.57422 | 646.794373 | 2 | 6  | 26.6521 | 54.97 |
| 10 | 48.28 | 50.28 | 79.7 YWHAQ_FlexIII | 99.0 YLAEVACGDDR                  | Propionamide(C) @ 7; Label: 13C(6)15N(4)(R) @ 11                                                | missed K-D @ 19      | -0.0081429  | 1291.56604 | 646.7903 | 1291.57422 | 646.794373 | 2 | 8  | 27.1739 | 54.97 |
| 10 | 48.28 | 50.28 | 79.7 YWHAQ_FlexIII | 99.0 YLAEVACGDDR                  | Propionamide(C) @ 7; Label: 13C(6)15N(4)(R) @ 11                                                | missed K-D @ 19      | -0.0081429  | 1291.56604 | 646.7903 | 1291.57422 | 646.794373 | 2 | 6  | 27.4344 | 54.97 |
| 10 | 48.28 | 50.28 | 79.7 YWHAQ_FlexIII | 99.0 YLAEVACGDDR                  | Propionamide(C) @ 7; Label: 13C(6)15N(4)(R) @ 11                                                | missed K-D @ 19      | 0.00211098  | 1291.57642 | 646.7955 | 1291.57422 | 646.794373 | 2 | 10 | 24.753  | 54.97 |
| 10 | 48.28 | 50.28 | 79.7 YWHAQ_FlexIII | 99.0 YLAEVACGDDR                  | Propionamide(C) @ 7; Label: 13C(6)15N(4)(R) @ 11                                                | missed K-D @ 19      | 0.0118786   | 1291.5863  | 646.8004 | 1291.57422 | 646.794373 | 2 | 7  | 25.3152 | 54.97 |
| 10 | 48.28 | 50.28 | 79.7 YWHAQ_FlexIII | 99.0 YLAEVACGDDR                  | Propionamide(C) @ 7; Label: 13C(6)15N(4)(R) @ 11                                                | missed K-D @ 19      | -0.00045249 | 1291.57385 | 646.7942 | 1291.57422 | 646.794373 | 2 | 6  | 25.8536 | 54.97 |
| 10 | 48.28 | 50.28 | 79.7 YWHAQ_FlexIII | 99.0 YLAEVACGDDR                  | Propionamide(C) @ 7; Label: 13C(6)15N(4)(R) @ 11                                                | missed K-D @ 19      | -0.0081429  | 1291.56604 | 646.7903 | 1291.57422 | 646.794373 | 2 | 6  | 26.91   | 54.97 |
| 10 | 48.28 | 50.28 | 79.7 YWHAQ_FlexIII | 99.0 YLAEVACGDDR                  | Propionamide(C) @ 7; Label: 13C(6)15N(4)(R) @ 11                                                | missed K-D @ 19      | -0.0081429  | 1291.56604 | 646.7903 | 1291.57422 | 646.794373 | 2 | 9  | 19.0448 | 54.97 |
| 10 | 48.28 | 50.28 | 79.7 YWHAQ_FlexIII | 99.0 YLAEVACGDDRK                 | Propionamide(C) @ 7; Label: 13C(6)15N(4)(R) @ 11; Label: 13C(6)15N(2)(K) @ 12                   | missed R-K @ 11      | 0.0023287   | 1427.68591 | 714.8502 | 1427.68335 | 714.848938 | 2 | 15 | 12.3158 | 54.97 |
| 10 | 48.28 | 50.28 | 79.7 YWHAQ_FlexIII | 99.0 YLAEVACGDDRK                 | Propionamide(C) @ 7; Label: 13C(6)15N(4)(R) @ 11; Label: 13C(6)15N(2)(K) @ 12                   | missed R-K @ 11      | 0.00134626  | 1427.68469 | 476.9022 | 1427.68335 | 476.901733 | 3 | 12 | 12.5552 | 54.97 |
| 10 | 48.28 | 50.28 | 79.7 YWHAQ_FlexIII | 99.0 YLAEVACGDDRK                 | Propionamide(C) @ 7; Label: 13C(6)15N(4)(R) @ 11; Label: 13C(6)15N(2)(K) @ 12                   | missed R-K @ 11      | -0.00060098 | 1427.68286 | 714.8487 | 1427.68335 | 714.848938 | 2 | 15 | 12.5769 | 54.97 |
| 10 | 48.28 | 50.28 | 79.7 YWHAQ_FlexIII | 99.0 YLAEVACGDDRK                 | Propionamide(C) @ 7; Label: 13C(6)15N(4)(R) @ 11; Label: 13C(6)15N(2)(K) @ 12                   | missed R-K @ 11      | 0.00317731  | 1427.68652 | 476.9028 | 1427.68335 | 476.901733 | 3 | 12 | 12.8946 | 54.97 |
| 10 | 48.28 | 50.28 | 79.7 YWHAQ_FlexIII | 99.0 YPTFLYK                      | Label: 13C(6)15N(2)(K) @ 7                                                                      | cleaved N-Y @ N-term | 0.00057017  | 938.499878 | 470.2572 | 938.499329 | 470.256928 | 2 | 9  | 15.0367 | 54.97 |
| 10 | 48.28 | 50.28 | 79.7 YWHAQ_FlexIII | 99.0 YPTFLYK                      | Label: 13C(6)15N(2)(K) @ 7                                                                      | cleaved N-Y @ N-term | 0.00619955  | 938.507446 | 470.261  | 938.499329 | 470.256928 | 2 | 9  | 14.7754 | 54.97 |
| 10 | 48.28 | 50.28 | 79.7 YWHAQ_FlexIII | 99.0 YPTFLYK                      | Label: 13C(6)15N(2)(K) @ 7                                                                      | cleaved N-Y @ N-term | 0.00073716  | 938.500061 | 470.2573 | 938.499329 | 470.256928 | 2 | 9  | 15.0782 | 54.97 |
| 10 | 48.28 | 50.28 | 79.7 YWHAQ_FlexIII | 99.0 YPTFLYK                      | Label: 13C(6)15N(2)(K) @ 7                                                                      | cleaved N-Y @ N-term | 0.00092027  | 938.500244 | 470.2574 | 938.499329 | 470.256928 | 2 | 9  | 14.8156 | 54.97 |
| 13 | 39.97 | 41.97 | 60.7 TREM1_FlexIII | 99.0 ALCPLYTSR                    | Propionamide(C) @ 3; Label: 13C(6)15N(4)(R) @ 10                                                | missed R-D @ 6       | 0.00066094  | 1200.62073 | 601.3176 | 1200.62    | 601.317322 | 2 | 9  | 21.105  | 38.93 |
| 13 | 39.97 | 41.97 | 60.7 TREM1_FlexIII | 99.0 AWOIIRDGEMPK                 | Label: 13C(6)15N(4)(R) @ 6; Label: 13C(6)15N(2)(K) @ 12                                         | missed R-D @ 6       | -0.0121782  | 1460.74451 | 731.3795 | 1460.75647 | 731.385498 | 2 | 17 | 14.4435 | 38.93 |
| 13 | 39.97 | 41.97 | 60.7 TREM1_FlexIII | 99.0 CDYTLK                       | Propionamide(C) @ 1; Label: 13C(6)15N(2)(K) @ 7                                                 | missed R-D @ 6       | 0.00029972  | 949.430847 | 475.7227 | 949.4306   |            |   |    |         |       |

|    |       |       |                    |                                    |                                                                                                                          |                              |             |            |          |            |            |   |    |         |       |
|----|-------|-------|--------------------|------------------------------------|--------------------------------------------------------------------------------------------------------------------------|------------------------------|-------------|------------|----------|------------|------------|---|----|---------|-------|
| 13 | 39.97 | 41.97 | 60.7 TREM1_FlexIII | 99.0 TLACTERPSKNSHPVQVGR           | Propionamide(C) @4; Label: 13C(6)15N(4)(R) @7; Label: 13C(6)15N(2)(K) @10; Deamidated(N) @11; Label: 13C(6)15N(4)(R) @19 | missed K-N @10               | 0.00026188  | 2179.1167  | 727.3795 | 2179.11621 | 727.379334 | 3 | 14 | 11.4939 | 38.93 |
| 13 | 39.97 | 41.97 | 60.7 TREM1_FlexIII | 99.0 TVTQAPPK                      | Label: 13C(6)15N(2)(K) @8                                                                                                |                              | -0.00039789 | 848.484497 | 425.2495 | 848.484741 | 425.249634 | 2 | 10 | 9.7188  | 38.93 |
| 13 | 39.97 | 41.97 | 60.7 TREM1_FlexIII | 99.0 YELKEGQTLDVK                  | Label: 13C(6)15N(2)(K) @4; Label: 13C(6)15N(2)(K) @12                                                                    | missed K-E @4                | -0.00424211 | 1437.76453 | 719.8895 | 1437.76866 | 719.891602 | 2 | 17 | 13.1986 | 38.93 |
| 13 | 39.97 | 41.97 | 60.7 TREM1_FlexIII | 99.0 ALCPLYTSR                     | Propionamide(C) @3; Label: 13C(6)15N(4)(R) @10                                                                           |                              | 0.0004168   | 1200.62048 | 601.3175 | 1200.62    | 601.317322 | 2 | 8  | 21.9069 | 38.93 |
| 13 | 39.97 | 41.97 | 60.7 TREM1_FlexIII | 99.0 ALCPLYTSR                     | Propionamide(C) @3; Label: 13C(6)15N(4)(R) @10                                                                           |                              | 0.00468925  | 1200.62463 | 601.3196 | 1200.62    | 601.317322 | 2 | 8  | 22.6255 | 38.93 |
| 13 | 39.97 | 41.97 | 60.7 TREM1_FlexIII | 99.0 ALCPLYTSR                     | Propionamide(C) @3; Label: 13C(6)15N(4)(R) @10                                                                           |                              | 0.00468925  | 1200.62463 | 601.3196 | 1200.62    | 601.317322 | 2 | 7  | 25.8535 | 38.93 |
| 13 | 39.97 | 41.97 | 60.7 TREM1_FlexIII | 99.0 ALCPLYTSR                     | Propionamide(C) @3; Label: 13C(6)15N(4)(R) @10                                                                           |                              | 0.00468925  | 1200.62463 | 601.3196 | 1200.62    | 601.317322 | 2 | 9  | 19.3315 | 38.93 |
| 13 | 39.97 | 41.97 | 60.7 TREM1_FlexIII | 99.0 ALCPLYTSR                     | Propionamide(C) @3; Label: 13C(6)15N(4)(R) @10                                                                           |                              | 5.06E-05    | 1200.62012 | 601.3173 | 1200.62    | 601.317322 | 2 | 8  | 22.1985 | 38.93 |
| 13 | 39.97 | 41.97 | 60.7 TREM1_FlexIII | 99.0 ALCPLYTSR                     | Propionamide(C) @3; Label: 13C(6)15N(4)(R) @10                                                                           |                              | -0.00055977 | 1200.61951 | 601.317  | 1200.62    | 601.317322 | 2 | 8  | 25.0361 | 38.93 |
| 13 | 39.97 | 41.97 | 60.7 TREM1_FlexIII | 99.0 ALCPLYTSR                     | Propionamide(C) @3; Label: 13C(6)15N(4)(R) @10                                                                           |                              | 0.00468925  | 1200.62463 | 601.3196 | 1200.62    | 601.317322 | 2 | 6  | 27.9054 | 38.93 |
| 13 | 39.97 | 41.97 | 60.7 TREM1_FlexIII | 99.0 ALCPLYTSR                     | Propionamide(C) @3; Label: 13C(6)15N(4)(R) @10                                                                           |                              | -0.00031563 | 1200.61963 | 601.3171 | 1200.62    | 601.317322 | 2 | 8  | 21.6493 | 38.93 |
| 13 | 39.97 | 41.97 | 60.7 TREM1_FlexIII | 99.0 ALCPLYTSR                     | Propionamide(C) @3; Label: 13C(6)15N(4)(R) @10                                                                           |                              | -0.00117012 | 1200.6189  | 601.3167 | 1200.62    | 601.317322 | 2 | 6  | 26.3691 | 38.93 |
| 13 | 39.97 | 41.97 | 60.7 TREM1_FlexIII | 99.0 GFSGTPGSNENSTQNIVYK           | Label: 13C(6)15N(2)(K) @18                                                                                               |                              | 0.0051663   | 1893.86365 | 947.9391 | 1893.8584  | 947.936523 | 2 | 16 | 12.069  | 38.93 |
| 13 | 39.97 | 41.97 | 60.7 TREM1_FlexIII | 99.0 GFSGTPGSNENSTQNIVYK           | Label: 13C(6)15N(2)(K) @18                                                                                               |                              | 0.0011296   | 1894.84363 | 948.4291 | 1894.84241 | 948.428528 | 2 | 18 | 12.917  | 38.93 |
| 13 | 39.97 | 41.97 | 60.7 TREM1_FlexIII | 99.0 GFSGTPGSNENSTQNIVYK           | Label: 13C(6)15N(2)(K) @18                                                                                               |                              | -0.0115667  | 1893.84705 | 632.2896 | 1893.8584  | 632.293396 | 3 | 14 | 12.0221 | 38.93 |
| 13 | 39.97 | 41.97 | 60.7 TREM1_FlexIII | 99.0 GFSGTPGSNENSTQNIVYK           | Deamidated(N) @11; Label: 13C(6)15N(2)(K) @18                                                                            |                              | 0.0411686   | 1894.88367 | 948.4491 | 1894.84241 | 948.428528 | 2 | 13 | 13.1724 | 38.93 |
| 13 | 39.97 | 41.97 | 60.7 TREM1_FlexIII | 99.0 ILEDYHDHGLLR                  | Label: 13C(6)15N(4)(R) @13                                                                                               |                              | 0.0079802   | 1602.84717 | 535.2897 | 1602.83936 | 535.287048 | 3 | 13 | 14.0365 | 38.93 |
| 13 | 39.97 | 41.97 | 60.7 TREM1_FlexIII | 99.0 ILEDYHDHGLLR                  | Label: 13C(6)15N(4)(R) @13                                                                                               |                              | -7.64E-05   | 1602.83911 | 535.287  | 1602.83936 | 535.287048 | 3 | 12 | 14.5822 | 38.93 |
| 13 | 39.97 | 41.97 | 60.7 TREM1_FlexIII | 99.0 ILEDYHDHGLLR                  |                                                                                                                          |                              | -0.0015663  | 1592.82971 | 399.2147 | 1592.83106 | 399.215057 | 4 | 11 | 14.1592 | 38.93 |
| 13 | 39.97 | 41.97 | 60.7 TREM1_FlexIII | 99.0 ILEDYHDHGLLR                  | Label: 13C(6)15N(4)(R) @13                                                                                               |                              | 0.00028979  | 1602.83972 | 535.2872 | 1602.83936 | 535.287048 | 3 | 11 | 14.3067 | 38.93 |
| 13 | 39.97 | 41.97 | 60.7 TREM1_FlexIII | 99.0 ILEDYHDHGLLR                  | Label: 13C(6)15N(4)(R) @13                                                                                               |                              | 0.0113888   | 1602.85095 | 401.72   | 1602.83936 | 401.717102 | 4 | 11 | 14.5603 | 38.93 |
| 13 | 39.97 | 41.97 | 60.7 TREM1_FlexIII | 99.0 ILEDYHDHGLLR                  | Label: 13C(6)15N(4)(R) @13                                                                                               |                              | -0.00057412 | 1602.83899 | 401.717  | 1602.83936 | 401.717102 | 4 | 10 | 24.6413 | 38.93 |
| 13 | 39.97 | 41.97 | 60.7 TREM1_FlexIII | 99.0 LTEEKVELK                     | Label: 13C(6)15N(2)(K) @5; Label: 13C(6)15N(2)(K) @9                                                                     | missed K-Y @5                | 0.00900729  | 1167.6449  | 584.8297 | 1167.63574 | 584.825195 | 2 | 14 | 12.2841 | 38.93 |
| 13 | 39.97 | 41.97 | 60.7 TREM1_FlexIII | 99.0 LTEEKVELK                     | Label: 13C(6)15N(2)(K) @5; Label: 13C(6)15N(2)(K) @9                                                                     | missed K-Y @5                | 0.00231454  | 1167.63818 | 390.22   | 1167.63574 | 390.219208 | 3 | 10 | 12.5473 | 38.93 |
| 13 | 39.97 | 41.97 | 60.7 TREM1_FlexIII | 99.0 LTEEKVELK                     | Label: 13C(6)15N(2)(K) @5; Label: 13C(6)15N(2)(K) @9                                                                     | missed K-Y @5                | 0.00231454  | 1167.63818 | 390.22   | 1167.63574 | 390.219208 | 3 | 10 | 12.2828 | 38.93 |
| 13 | 39.97 | 41.97 | 60.7 TREM1_FlexIII | 99.0 LTEEKVELK                     | Label: 13C(6)15N(2)(K) @5; Label: 13C(6)15N(2)(K) @9; Label: 13C(6)15N(2)(K) @17                                         | missed K-Y @5; missed K-E @9 | 0.00192019  | 2046.09668 | 683.0395 | 2046.09473 | 683.038818 | 3 | 21 | 13.1125 | 38.93 |
| 13 | 39.97 | 41.97 | 60.7 TREM1_FlexIII | 99.0 LTEEKVELK                     | Label: 13C(6)15N(2)(K) @5; Label: 13C(6)15N(2)(K) @9; Label: 13C(6)15N(2)(K) @17                                         | missed K-Y @5; missed K-E @9 | -0.00455894 | 2046.09009 | 512.5298 | 2046.09473 | 512.530945 | 4 | 14 | 13.1106 | 38.93 |
| 13 | 39.97 | 41.97 | 60.7 TREM1_FlexIII | 99.0 MVNLQVEDSGLYQCIVYQPPKEPHMLFDR | Deamidated(Q) @13; Propionamide(C) @14; Label: 13C(6)15N(2)(K) @21; Label: 13C(6)15N(4)(R) @29                           | missed K-E @21               | 0.00873858  | 3538.71509 | 1180.579 | 3538.70532 | 1180.57568 | 3 | 17 | 16.267  | 38.93 |
| 13 | 39.97 | 41.97 | 60.7 TREM1_FlexIII | 99.0 MVNLQVEDSGLYQCIVYQPPKEPHMLFDR | Propionamide(C) @14; Label: 13C(6)15N(2)(K) @21; Label: 13C(6)15N(4)(R) @29                                              | missed K-E @21               | -0.00255393 | 3537.71899 | 885.437  | 3537.72144 | 885.437622 | 4 | 16 | 16.7233 | 38.93 |
| 13 | 39.97 | 41.97 | 60.7 TREM1_FlexIII | 99.0 MVNLQVEDSGLYQCIVYQPPKEPHMLFDR | Propionamide(C) @14; Label: 13C(6)15N(2)(K) @21; Label: 13C(6)15N(4)(R) @29                                              | missed K-E @21               | 0.0006199   | 3537.72168 | 885.4377 | 3537.72144 | 885.437622 | 4 | 17 | 16.9897 | 38.93 |
| 13 | 39.97 | 41.97 | 60.7 TREM1_FlexIII | 99.0 MVNLQVEDSGLYQCIVYQPPKEPHMLFDR | Deamidated(Q) @13; Propionamide(C) @14; Label: 13C(6)15N(2)(K) @21; Label: 13C(6)15N(4)(R) @29                           | missed K-E @21               | 0.0222179   | 3538.7273  | 885.6891 | 3538.70532 | 885.683594 | 4 | 16 | 15.904  | 38.93 |
| 13 | 39.97 | 41.97 | 60.7 TREM1_FlexIII | 99.0 MVNLQVEDSGLYQCIVYQPPKEPHMLFDR | Propionamide(C) @14; Label: 13C(6)15N(2)(K) @21; Label: 13C(6)15N(4)(R) @29                                              | missed K-E @21               | -0.00133323 | 3537.72022 | 885.4373 | 3537.72144 | 885.437622 | 4 | 15 | 16.431  | 38.93 |
| 13 | 39.97 | 41.97 | 60.7 TREM1_FlexIII | 99.0 MVNLQVEDSGLYQCIVYQPPKEPHMLFDR | Propionamide(C) @14; Label: 13C(6)15N(2)(K) @21; Label: 13C(6)15N(4)(R) @29                                              | missed K-E @21               | 0.00215518  | 3537.72241 | 1180.248 | 3537.72144 | 1180.24768 | 3 | 15 | 16.7982 | 38.93 |
| 13 | 39.97 | 41.97 | 60.7 TREM1_FlexIII | 99.0 MVNLQVEDSGLYQCIVYQPPKEPHMLFDR | Deamidated(Q) @13; Propionamide(C) @14; Label: 13C(6)15N(2)(K) @21; Label: 13C(6)15N(4)(R) @29                           | missed K-E @21               | 0.00554593  | 3538.71118 | 708.7495 | 3538.70532 | 708.748352 | 5 | 15 | 16.4824 | 38.93 |
| 13 | 39.97 | 41.97 | 60.7 TREM1_FlexIII | 99.0 MVNLQVEDSGLYQCIVYQPPKEPHMLFDR | Propionamide(C) @14; Label: 13C(6)15N(2)(K) @21; Label: 13C(6)15N(4)(R) @29                                              | missed K-E @21               | 0.0018406   | 3537.7229  | 885.438  | 3537.72144 | 885.437622 | 4 | 13 | 16.1622 | 38.93 |
| 13 | 39.97 | 41.97 | 60.7 TREM1_FlexIII | 99.0 NSHPVQVGR                     | Label: 13C(6)15N(4)(R) @9                                                                                                |                              | -0.00033754 | 1002.52307 | 502.2688 | 1002.52344 | 502.269013 | 2 | 10 | 8.9997  | 38.93 |
| 13 | 39.97 | 41.97 | 60.7 TREM1_FlexIII | 99.0 NSHPVQVGR                     | Label: 13C(6)15N(4)(R) @9                                                                                                |                              | -0.00019263 | 1002.52325 | 502.2689 | 1002.52344 | 502.269013 | 2 | 10 | 10.6161 | 38.93 |
| 13 | 39.97 | 41.97 | 60.7 TREM1_FlexIII | 99.0 NSHPVQVGR                     | Label: 13C(6)15N(4)(R) @9                                                                                                |                              | -0.00080298 | 1002.52264 | 502.2686 | 1002.52344 | 502.269013 | 2 | 9  | 8.7309  | 38.93 |
| 13 | 39.97 | 41.97 | 60.7 TREM1_FlexIII | 99.0 NSHPVQVGR                     | Label: 13C(6)15N(4)(R) @9                                                                                                |                              | -0.00061988 | 1002.52289 | 502.2687 | 1002.52344 | 502.269013 | 2 | 9  | 9.5258  | 38.93 |
| 13 | 39.97 | 41.97 | 60.7 TREM1_FlexIII | 99.0 NSHPVQVGR                     | Label: 13C(6)15N(4)(R) @9                                                                                                |                              | -0.00086609 | 1002.52246 | 502.2685 | 1002.52344 | 502.269013 | 2 | 8  | 10.0563 | 38.93 |
| 13 | 39.97 | 41.97 | 60.7 TREM1_FlexIII | 99.0 STADVSTPDSEINTNVTDIIR         | Deamidated(N) @13; Label: 13C(6)15N(4)(R) @22                                                                            |                              | 0.0132313   | 2371.17651 | 791.3994 | 2371.16309 | 791.394959 | 3 | 19 | 16.3577 | 38.93 |
| 13 | 39.97 | 41.97 | 60.7 TREM1_FlexIII | 99.0 TLACTERPSK                    | Propionamide(C) @4; Label: 13C(6)15N(4)(R) @7; Label: 13C(6)15N(2)(K) @10                                                |                              | 0.00542346  | 1193.62463 | 597.8196 | 1193.61939 | 597.816956 | 2 | 11 | 10.5946 | 38.93 |
| 13 | 39.97 | 41.97 | 60.7 TREM1_FlexIII | 99.0 TVTQAPPK                      | Label: 13C(6)15N(2)(K) @8                                                                                                |                              | -0.00039789 | 848.484497 | 425.2495 | 848.484741 | 425.249634 | 2 | 9  | 9.461   | 38.93 |
| 13 | 39.97 | 41.97 | 60.7 TREM1_FlexIII | 99.0 TVTQAPPK                      | Label: 13C(6)15N(2)(K) @8                                                                                                |                              | -0.00021478 | 848.484497 | 425.2495 | 848.484741 | 425.249634 | 2 | 9  | 9.9835  | 38.93 |
| 13 | 39.97 | 41.97 | 60.7 TREM1_FlexIII | 99.0 TVTQAPPK                      | Label: 13C(6)15N(2)(K) @8                                                                                                |                              | -0.00039789 | 848.484497 | 425.2495 | 848.484741 | 425.249634 | 2 | 9  | 9.2087  | 38.93 |
| 13 | 39.97 | 41.97 | 60.7 TREM1_FlexIII | 99.0 TVTQAPPK                      | Label: 13C(6)15N(2)(K) @8                                                                                                |                              | -0.00021478 | 848.484497 | 425.2495 | 848.484741 | 425.249634 | 2 | 9  | 10.2872 | 38.93 |
| 13 | 39.97 | 41.97 | 60.7 TREM1_FlexIII | 99.0 TVTQAPPK                      | Label: 13C(6)15N(2)(K) @8                                                                                                |                              | -0.00064203 | 848.48407  | 425.2493 | 848.484741 | 425.249634 | 2 | 9  | 8.951   | 38.93 |
| 13 | 39.97 | 41.97 | 60.7 TREM1_FlexIII | 99.0 YELKEGQTLDVK                  | Label: 13C(6)15N(2)(K) @4; Label: 13C(6)15N(2)(K) @12                                                                    | missed K-E @4                | -0.0109043  | 1437.75781 | 480.2599 | 1437.76866 | 480.263489 | 3 | 13 | 13.152  | 38.93 |
| 13 | 39.97 | 41.97 | 60.7 TREM1_FlexIII | 99.0 YPTFLYK                       | Label: 13C(6)15N(2)(K) @7                                                                                                | cleaved P-Y @N-term          | 0.00057017  | 938.499678 | 470.2572 | 938.499329 | 470.256928 | 2 | 9  | 15.0367 | 38.93 |
| 13 | 39.97 | 41.97 | 60.7 TREM1_FlexIII | 99.0 YPTFLYK                       | Label: 13C(6)15N(2)(K) @7                                                                                                | cleaved P-Y @N-term          | 0.00619955  | 938.507446 | 470.261  | 938.499329 | 470.256928 | 2 | 9  | 14.7754 | 38.93 |
| 13 | 39.97 | 41.97 | 60.7 TREM1_FlexIII | 99.0 YPTFLYK                       | Label: 13C(6)15N(2)(K) @7                                                                                                | cleaved P-Y @N-term          | 0.00073716  | 938.500061 | 470.2573 | 938.499329 | 470.256928 | 2 | 9  | 15.0782 | 38.93 |
| 13 | 39.97 | 41.97 | 60.7 TREM1_FlexIII | 99.0 YPTFLYK                       | Label: 13C(6)15N(2)(K) @7                                                                                                | cleaved P-Y @N-term          | 0.00952027  | 938.500244 | 470.2574 | 938.499329 | 470.256928 | 2 | 9  | 14.8156 | 38.93 |
| 14 | 38.47 | 42.47 | 48.1 CCNE1_FlexIII | 99.0 ANVTYFLQDPDEEMAK              | Label: 13C(6)15N(2)(K) @16                                                                                               |                              | -0.00082826 | 1813.86401 | 907.9393 | 1813.86475 | 907.939636 | 2 | 19 | 15.7324 | 11.02 |
| 14 | 38.47 | 42.47 | 48.1 CCNE1_FlexIII | 99.0 ANVTYFLQDPDEEMAKIDR           | Label: 13C(6)15N(2)(K) @16; Label: 13C(6)15N(4)(R) @19                                                                   | missed K-I @16               | -0.0173881  | 2208.06738 | 1105.041 | 2208.08521 | 1105.04981 | 2 | 21 | 16.7945 | 11.02 |
| 14 | 38.47 | 42.47 | 48.1 CCNE1_FlexIII | 99.0 ASPLPSGLLTTPQSGK              | Label: 13C(6)15N(2)(K) @16                                                                                               |                              | -0.00163961 | 1556.86365 | 779.4391 | 1556.86536 | 779.439941 | 2 | 19 | 15.3014 | 11.02 |
| 14 | 38.47 | 42.47 | 48.1 CCNE1_FlexIII | 99.0 ASPLPSGLLTTPQSGKK             | Label: 13C(6)15N(2)(K) @16; Label: 13C(6)15N(2)(K) @17                                                                   |                              | -0.00729206 | 1692.96729 | 847.4909 | 1692.97449 | 847.494507 | 2 | 15 | 15.8401 | 11.02 |
| 14 | 38.47 | 42.47 | 48.1 CCNE1_FlexIII | 99.0 DQHFLEQHPILLQPK               | Label: 13C(6)15N(2)(K) @14                                                                                               | missed K-K @16               | 0.00165229  | 1736.91065 | 579.9775 | 1736.90894 | 579.976929 | 3 | 15 | 15.8904 | 11.02 |
| 14 | 38.47 | 42.47 | 48.1 CCNE1_FlexIII | 99.0 DSLDLLDK                      |                                                                                                                          |                              | -0.00138707 | 917.468299 | 459.7419 | 917.470581 | 459.742554 | 2 | 10 | 14.7596 | 11.02 |
| 14 | 38.47 |       |                    |                                    |                                                                                                                          |                              |             |            |          |            |            |   |    |         |       |

|    |       |       |                    |                          |                                                                               |                            |             |            |            |            |            |    |         |         |       |
|----|-------|-------|--------------------|--------------------------|-------------------------------------------------------------------------------|----------------------------|-------------|------------|------------|------------|------------|----|---------|---------|-------|
| 14 | 38.47 | 42.47 | 48.1 CCNE1_FlexIII | 99.0 TYLRDQHFLQHPLLQPK   | Label: 13C(6)15N(4)(R)@4; Label: 13C(6)15N(2)(K)@18                           | missed R-D@4               | 0.00729571  | 2280.2207  | 761.0809   | 2280.21338 | 761.07843  | 3  | 15      | 17.7908 | 11.02 |
| 14 | 38.47 | 42.47 | 48.1 CCNE1_FlexIII | 99.0 VSGYQWCIENCVK       | Propionamide(C)@7; Propionamide(C)@12; Label: 13C(6)15N(2)(K)@14              |                            | 0.0009061   | 1792.80127 | 897.4079   | 1792.80042 | 897.407471 | 2  | 18      | 15.1251 | 11.02 |
| 14 | 38.47 | 42.47 | 48.1 CCNE1_FlexIII | 99.0 VYPNSTCKPR          | Propionamide(C)@7; Label: 13C(6)15N(2)(K)@8; Label: 13C(6)15N(4)(R)@10        |                            | 0.00195197  | 1252.63733 | 627.3259   | 1252.63525 | 627.324951 | 2  | 9       | 10.8063 | 11.02 |
| 14 | 38.47 | 42.47 | 48.1 CCNE1_FlexIII | 99.0 WMVPFAMVIR          | Label: 13C(6)15N(4)(R)@10                                                     |                            | 0.00312485  | 1258.66272 | 630.3386   | 1258.65942 | 630.336975 | 2  | 10      | 18.0012 | 11.02 |
| 14 | 38.47 | 42.47 | 48.1 CCNE1_FlexIII | 99.0 ANVTVFLQDPDEEMAK    | Label: 13C(6)15N(2)(K)@16                                                     |                            | 0.00234557  | 1813.86731 | 907.9409   | 1813.86475 | 907.939636 | 2  | 18      | 15.9977 | 11.02 |
| 14 | 38.47 | 42.47 | 48.1 CCNE1_FlexIII | 99.0 ANVTVFLQDPDEEMAKIR  | Deamidated(Q)@8; Label: 13C(6)15N(2)(K)@16                                    |                            | 0.018575    | 1814.86743 | 908.441    | 1814.84876 | 908.431641 | 2  | 15      | 15.4617 | 11.02 |
| 14 | 38.47 | 42.47 | 48.1 CCNE1_FlexIII | 99.0 ANVTVFLQDPDEEMAK    | Label: 13C(6)15N(2)(K)@16                                                     |                            | 0.00258971  | 1813.86743 | 907.941    | 1813.86475 | 907.939636 | 2  | 13      | 16.2993 | 11.02 |
| 14 | 38.47 | 42.47 | 48.1 CCNE1_FlexIII | 99.0 ANVTVFLQDPDEEMAK    | Label: 13C(6)15N(2)(K)@16                                                     |                            | 0.00258971  | 1813.86743 | 907.941    | 1813.86475 | 907.939636 | 2  | 8       | 18.4659 | 11.02 |
| 14 | 38.47 | 42.47 | 48.1 CCNE1_FlexIII | 99.0 ANVTVFLQDPDEEMAKIDR | Label: 13C(6)15N(2)(K)@16; Label: 13C(6)15N(4)(R)@19                          | missed K-I@16              | 0.0153696   | 2208.10059 | 737.0408   | 2208.08521 | 737.035645 | 3  | 17      | 16.1634 | 11.02 |
| 14 | 38.47 | 42.47 | 48.1 CCNE1_FlexIII | 99.0 ANVTVFLQDPDEEMAKIDR | Label: 13C(6)15N(2)(K)@16; Label: 13C(6)15N(4)(R)@19                          | missed K-I@16              | 0.00263149  | 2208.0874  | 1105.051   | 2208.08521 | 1105.04981 | 2  | 18      | 16.2481 | 11.02 |
| 14 | 38.47 | 42.47 | 48.1 CCNE1_FlexIII | 99.0 ANVTVFLQDPDEEMAKIDR | Label: 13C(6)15N(2)(K)@16; Label: 13C(6)15N(4)(R)@19                          | -0.0144767                 | 2208.07056  | 737.0308   | 2208.08521 | 737.035645 | 3          | 18 | 16.4454 | 11.02   |       |
| 14 | 38.47 | 42.47 | 48.1 CCNE1_FlexIII | 99.0 ANVTVFLQDPDEEMAKIDR | Label: 13C(6)15N(2)(K)@16; Label: 13C(6)15N(4)(R)@19                          | missed K-I@16              | 0.00263149  | 2208.0874  | 1105.051   | 2208.08521 | 1105.04981 | 2  | 15      | 16.5229 | 11.02 |
| 14 | 38.47 | 42.47 | 48.1 CCNE1_FlexIII | 99.0 ANVTVFLQDPDEEMAKIDR | Label: 13C(6)15N(2)(K)@16; Label: 13C(6)15N(4)(R)@19                          | -0.0144767                 | 2208.07056  | 737.0308   | 2208.08521 | 737.035645 | 3          | 18 | 16.7177 | 11.02   |       |
| 14 | 38.47 | 42.47 | 48.1 CCNE1_FlexIII | 99.0 ANVTVFLQDPDEEMAKIDR | Deamidated(Q)@8; Label: 13C(6)15N(2)(K)@16; Label: 13C(6)15N(4)(R)@19         | missed K-I@16              | 0.0214061   | 2209.09058 | 737.3708   | 2209.08909 | 737.363648 | 3  | 16      | 16.9835 | 11.02 |
| 14 | 38.47 | 42.47 | 48.1 CCNE1_FlexIII | 99.0 ASPLPSGLLTPPOSQK    | Label: 13C(6)15N(2)(K)@16                                                     | missed K-I@16              | 0.00177836  | 1556.86731 | 779.4409   | 1556.86536 | 779.439941 | 2  | 15      | 15.0267 | 11.02 |
| 14 | 38.47 | 42.47 | 48.1 CCNE1_FlexIII | 99.0 ASPLPSGLLTPPOSQK    | Label: 13C(6)15N(2)(K)@16                                                     |                            | 0.00177836  | 1556.86731 | 779.4409   | 1556.86536 | 779.439941 | 2  | 14      | 15.5677 | 11.02 |
| 14 | 38.47 | 42.47 | 48.1 CCNE1_FlexIII | 99.0 ASPLPSGLLTPPOSQKK   | Label: 13C(6)15N(2)(K)@16; Label: 13C(6)15N(2)(K)@17                          | missed K-K@16              | -0.00729206 | 1692.96729 | 847.4909   | 1692.97449 | 847.494507 | 2  | 16      | 14.7477 | 11.02 |
| 14 | 38.47 | 42.47 | 48.1 CCNE1_FlexIII | 99.0 ASPLPSGLLTPPOSQKK   | Label: 13C(6)15N(2)(K)@16; Label: 13C(6)15N(2)(K)@17                          | missed K-K@16              | -0.00167682 | 1692.9729  | 847.4937   | 1692.97449 | 847.494507 | 2  | 16      | 15.0182 | 11.02 |
| 14 | 38.47 | 42.47 | 48.1 CCNE1_FlexIII | 99.0 ASPLPSGLLTPPOSQKK   | Label: 13C(6)15N(2)(K)@16; Label: 13C(6)15N(2)(K)@17                          | missed K-K@16              | -0.00729206 | 1692.96729 | 847.4909   | 1692.97449 | 847.494507 | 2  | 15      | 15.2746 | 11.02 |
| 14 | 38.47 | 42.47 | 48.1 CCNE1_FlexIII | 99.0 ASPLPSGLLTPPOSQKK   | Label: 13C(6)15N(2)(K)@16; Label: 13C(6)15N(2)(K)@17                          | missed K-K@16              | -0.00570514 | 1692.96887 | 847.4917   | 1692.97449 | 847.494507 | 2  | 12      | 14.4759 | 11.02 |
| 14 | 38.47 | 42.47 | 48.1 CCNE1_FlexIII | 99.0 ASPLPSGLLTPPOSQKK   | Label: 13C(6)15N(2)(K)@16; Label: 13C(6)15N(2)(K)@17                          | missed K-K@16              | -0.0010819  | 1692.97449 | 565.3321   | 1692.97449 | 565.332092 | 3  | 14      | 14.6488 | 11.02 |
| 14 | 38.47 | 42.47 | 48.1 CCNE1_FlexIII | 99.0 ASPLPSGLLTPPOSQKK   | Label: 13C(6)15N(2)(K)@16; Label: 13C(6)15N(2)(K)@17                          | missed K-K@16              | -0.0004744  | 1692.97412 | 565.332    | 1692.97449 | 565.332092 | 3  | 11      | 14.9142 | 11.02 |
| 14 | 38.47 | 42.47 | 48.1 CCNE1_FlexIII | 99.0 ASPLPSGLLTPPOSQKK   | Label: 13C(6)15N(2)(K)@16; Label: 13C(6)15N(2)(K)@17                          | missed K-K@16              | -0.00431962 | 1692.97022 | 565.3307   | 1692.97449 | 565.332092 | 3  | 12      | 15.1968 | 11.02 |
| 14 | 38.47 | 42.47 | 48.1 CCNE1_FlexIII | 99.0 ASPLPSGLLTPPOSQKK   | Label: 13C(6)15N(2)(K)@16; Label: 13C(6)15N(2)(K)@17                          | missed K-K@16              | -0.00193925 | 1692.97266 | 565.3315   | 1692.97449 | 565.332092 | 3  | 13      | 15.4536 | 11.02 |
| 14 | 38.47 | 42.47 | 48.1 CCNE1_FlexIII | 99.0 ASPLPSGLLTPPOSQKK   | Label: 13C(6)15N(2)(K)@16; Label: 13C(6)15N(2)(K)@17                          | missed K-K@16              | -0.00729206 | 1692.96729 | 847.4909   | 1692.97449 | 847.494507 | 2  | 13      | 15.5812 | 11.02 |
| 14 | 38.47 | 42.47 | 48.1 CCNE1_FlexIII | 99.0 ASPLPSGLLTPPOSQKK   | Label: 13C(6)15N(2)(K)@16; Label: 13C(6)15N(2)(K)@17                          | missed K-K@16              | -0.00431962 | 1692.97022 | 565.3307   | 1692.97449 | 565.332092 | 3  | 13      | 15.7089 | 11.02 |
| 14 | 38.47 | 42.47 | 48.1 CCNE1_FlexIII | 99.0 ASPLPSGLLTPPOSQKK   | Label: 13C(6)15N(2)(K)@16; Label: 13C(6)15N(2)(K)@17                          | missed K-K@16              | -0.0010819  | 1692.97449 | 565.3321   | 1692.97449 | 565.332092 | 3  | 12      | 15.9709 | 11.02 |
| 14 | 38.47 | 42.47 | 48.1 CCNE1_FlexIII | 99.0 AYPFTLYK            | Label: 13C(6)15N(2)(K)@8                                                      | cleaved M-A@N-term         | 0.00028802  | 1009.53668 | 505.7756   | 1009.53644 | 505.775482 | 2  | 10      | 15.0379 | 11.02 |
| 14 | 38.47 | 42.47 | 48.1 CCNE1_FlexIII | 99.0 AYPFTLYK            | Label: 13C(6)15N(2)(K)@8                                                      | cleaved M-A@N-term         | 0.00039559  | 1009.53687 | 505.7757   | 1009.53644 | 505.775482 | 2  | 10      | 14.6894 | 11.02 |
| 14 | 38.47 | 42.47 | 48.1 CCNE1_FlexIII | 99.0 AYPFTLYK            | Label: 13C(6)15N(2)(K)@8                                                      | cleaved M-A@N-term         | 0.00021248  | 1009.53668 | 505.7756   | 1009.53644 | 505.775482 | 2  | 10      | 14.9532 | 11.02 |
| 14 | 38.47 | 42.47 | 48.1 CCNE1_FlexIII | 99.0 DQHFLEQHPLLQPK      | Label: 13C(6)15N(2)(K)@14                                                     |                            | -0.00109429 | 1736.90808 | 579.9766   | 1736.90894 | 579.976929 | 3  | 12      | 15.3658 | 11.02 |
| 14 | 38.47 | 42.47 | 48.1 CCNE1_FlexIII | 99.0 DQHFLEQHPLLQPK      | Label: 13C(6)15N(2)(K)@14                                                     |                            | -0.0158221  | 1736.89331 | 435.2306   | 1736.90894 | 435.234528 | 4  | 11      | 15.386  | 11.02 |
| 14 | 38.47 | 42.47 | 48.1 CCNE1_FlexIII | 99.0 DQHFLEQHPLLQPK      | Label: 13C(6)15N(2)(K)@14                                                     |                            | -0.00292535 | 1736.90625 | 579.976    | 1736.90894 | 579.976929 | 3  | 13      | 15.6235 | 11.02 |
| 14 | 38.47 | 42.47 | 48.1 CCNE1_FlexIII | 99.0 DQHFLEQHPLLQPK      | Label: 13C(6)15N(2)(K)@14                                                     |                            | -0.0158221  | 1736.89331 | 435.2306   | 1736.90894 | 435.234528 | 4  | 12      | 15.7141 | 11.02 |
| 14 | 38.47 | 42.47 | 48.1 CCNE1_FlexIII | 99.0 DQHFLEQHPLLQPK      | Label: 13C(6)15N(2)(K)@14                                                     |                            | 0.00138986  | 1736.91052 | 435.2349   | 1736.90894 | 435.234528 | 4  | 13      | 15.9992 | 11.02 |
| 14 | 38.47 | 42.47 | 48.1 CCNE1_FlexIII | 99.0 DQHFLEQHPLLQPK      | Label: 13C(6)15N(2)(K)@14                                                     |                            | -0.00017877 | 1736.90894 | 579.9769   | 1736.90894 | 579.976929 | 3  | 13      | 16.1554 | 11.02 |
| 14 | 38.47 | 42.47 | 48.1 CCNE1_FlexIII | 99.0 DQHFLEQHPLLQPK      | Label: 13C(6)15N(2)(K)@14                                                     |                            | 0.00090158  | 1736.90979 | 435.2347   | 1736.90894 | 435.234528 | 4  | 12      | 16.2576 | 11.02 |
| 14 | 38.47 | 42.47 | 48.1 CCNE1_FlexIII | 99.0 DQHFLEQHPLLQPK      | Label: 13C(6)15N(2)(K)@14                                                     |                            | -0.00162532 | 1736.90723 | 869.4609   | 1736.90894 | 869.461731 | 2  | 11      | 16.3236 | 11.02 |
| 14 | 38.47 | 42.47 | 48.1 CCNE1_FlexIII | 99.0 DQHFLEQHPLLQPK      | Label: 13C(6)15N(2)(K)@14                                                     |                            | 0.0111738   | 1736.92029 | 579.9807   | 1736.90894 | 579.976929 | 3  | 14      | 16.4177 | 11.02 |
| 14 | 38.47 | 42.47 | 48.1 CCNE1_FlexIII | 99.0 DSLDLLDK            | Label: 13C(6)15N(2)(K)@8                                                      |                            | -0.00038145 | 925.484497 | 463.7495   | 925.484802 | 463.749664 | 2  | 10      | 14.9129 | 11.02 |
| 14 | 38.47 | 42.47 | 48.1 CCNE1_FlexIII | 99.0 DSLDLLDK            | Label: 13C(6)15N(2)(K)@8                                                      |                            | 0.0002289   | 925.485046 | 463.7498   | 925.484802 | 463.749664 | 2  | 10      | 15.1708 | 11.02 |
| 14 | 38.47 | 42.47 | 48.1 CCNE1_FlexIII | 99.0 DSLDLLDKAR          | Label: 13C(6)15N(2)(K)@8; Label: 13C(6)15N(4)(R)@10                           | missed K-A@8               | 0.00090993  | 1162.63232 | 582.3234   | 1162.63123 | 582.322937 | 2  | 13      | 14.2113 | 11.02 |
| 14 | 38.47 | 42.47 | 48.1 CCNE1_FlexIII | 99.0 DTMKEDGGAEFSAR      | Label: 13C(6)15N(2)(K)@4; Label: 13C(6)15N(4)(R)@14                           | missed K-E@4               | -0.00389705 | 1530.66992 | 511.2306   | 1530.67395 | 511.231934 | 3  | 16      | 12.2906 | 11.02 |
| 14 | 38.47 | 42.47 | 48.1 CCNE1_FlexIII | 99.0 DTMKEDGGAEFSAR      | Label: 13C(6)15N(2)(K)@4; Label: 13C(6)15N(4)(R)@14                           | missed K-E@4               | -0.00389705 | 1530.66992 | 511.2306   | 1530.67395 | 511.231934 | 3  | 15      | 12.6033 | 11.02 |
| 14 | 38.47 | 42.47 | 48.1 CCNE1_FlexIII | 99.0 DTMKEDGGAEFSAR      | Label: 13C(6)15N(2)(K)@4; Label: 13C(6)15N(4)(R)@14                           | missed K-E@4               | -0.00032649 | 1530.67358 | 511.2318   | 1530.67395 | 511.231934 | 3  | 16      | 12.862  | 11.02 |
| 14 | 38.47 | 42.47 | 48.1 CCNE1_FlexIII | 99.0 DTMKEDGGAEFSAR      | Label: 13C(6)15N(2)(K)@4; Label: 13C(6)15N(4)(R)@14                           | missed K-E@4               | -0.00389705 | 1530.66992 | 511.2306   | 1530.67395 | 511.231934 | 3  | 14      | 11.5588 | 11.02 |
| 14 | 38.47 | 42.47 | 48.1 CCNE1_FlexIII | 99.0 DTMKEDGGAEFSAR      | Label: 13C(6)15N(2)(K)@4; Label: 13C(6)15N(4)(R)@14                           | missed K-E@4               | -0.00677794 | 1530.66724 | 766.3409   | 1530.67395 | 766.344238 | 2  | 14      | 12.5832 | 11.02 |
| 14 | 38.47 | 42.47 | 48.1 CCNE1_FlexIII | 99.0 DTMKEDGGAEFSAR      | Label: 13C(6)15N(2)(K)@4; Label: 13C(6)15N(4)(R)@14                           | missed K-E@4               | -0.00677794 | 1530.66724 | 766.3409   | 1530.67395 | 766.344238 | 2  | 12      | 12.8643 | 11.02 |
| 14 | 38.47 | 42.47 | 48.1 CCNE1_FlexIII | 99.0 ERDTMKEDGGAEFSAR    | Label: 13C(6)15N(4)(R)@2; Label: 13C(6)15N(2)(K)@6; Label: 13C(6)15N(4)(R)@16 | missed R-D@2; missed K-E@6 | 0.00141268  | 1825.82752 | 913.921    | 1825.82593 | 913.920227 | 2  | 25      | 11.919  | 11.02 |
| 14 | 38.47 | 42.47 | 48.1 CCNE1_FlexIII | 99.0 ERDTMKEDGGAEFSAR    | Label: 13C(6)15N(4)(R)@2; Label: 13C(6)15N(2)(K)@6; Label: 13C(6)15N(4)(R)@16 | missed R-D@2; missed K-E@6 | 0.0143339   | 1825.84033 | 609.6207   | 1825.82593 | 609.615906 | 3  | 15      | 12.1642 | 11.02 |
| 14 | 38.47 | 42.47 | 48.1 CCNE1_FlexIII | 99.0 ERDTMKEDGGAEFSAR    | Label: 13C(6)15N(4)(R)@2; Label: 13C(6)15N(2)(K)@6; Label: 13C(6)15N(4)(R)@16 | missed R-D@2; missed K-E@6 | -0.00155359 | 1825.82459 | 457.4634   | 1825.82593 | 457.463745 | 4  | 12      | 11.3011 | 11.02 |
| 14 | 38.47 | 42.47 | 48.1 CCNE1_FlexIII | 99.0 ERDTMKEDGGAEFSAR    | Label: 13C(6)15N(4)(R)@2; Label: 13C(6)15N(2)(K)@6; Label: 13C(6)15N(4)(R)@16 | missed R-D@2; missed K-E@6 | -0.0127841  | 1825.81335 | 457.4606   | 1825.82593 | 457.463745 | 4  | 12      | 11.8544 | 11.02 |
| 14 | 38.47 | 42.47 | 48.1 CCNE1_FlexIII | 99.0 ERDTMKEDGGAEFSAR    | Label: 13C(6)15N(4)(R)@2; Label: 13C(6)15N(2)(K)@6; Label: 13C(6)15N(4)(R)@16 | missed R-D@2; missed K-E@6 | -0.0127841  | 1825.81335 | 457.4606   | 1825.82593 | 457.463745 | 4  | 13      | 12.1198 | 11.02 |
| 14 | 38.47 | 42.47 | 48.1 CCNE1_FlexIII | 99.0 ERDTMKEDGGAEFSAR    | Label: 13C(6)15N(4)(R)@2; Label: 13C(6)15N(2)(K)@6; Label: 13C(6)15N(4)(R)@16 | missed R-D@2; missed K-E@6 | -0.0156955  | 1825.8103  | 609.6107   | 1825.82593 | 609.615906 | 3  | 12      | 12.8312 | 11.02 |
| 14 | 38.47 | 42.47 | 48.1 CCNE1_FlexIII | 99.0 GSPLPVLSWANR        | Label: 13C(6)15N(4)(R)@12                                                     |                            | -2.30E-06   | 1305.70691 | 653.8607   | 1305.70691 | 653.860718 | 2  | 12      | 16.622  | 11.02 |
| 14 | 38.47 | 42.47 | 48.1 CCNE1_FlexIII | 99.0 GSPLPVLSWANR        | Label: 13C(6)15N(4)(R)@12                                                     |                            | -2.30E-06   | 1305.70691 | 653.8607   | 1305.70691 | 653.860718 | 2  | 11      | 16.9065 | 11.02 |
| 14 | 38.47 |       |                    |                          |                                                                               |                            |             |            |            |            |            |    |         |         |       |

|    |       |       |                      |                                   |                                                                                                      |                               |             |            |          |            |            |   |    |         |       |
|----|-------|-------|----------------------|-----------------------------------|------------------------------------------------------------------------------------------------------|-------------------------------|-------------|------------|----------|------------|------------|---|----|---------|-------|
| 14 | 38.47 | 42.47 | 48.1 CCNE1_FlexIII   | 99.0 GVADEDAHNIQTHR               | Label: 13C(6)15N(4)(R)@ 14                                                                           |                               | 0.00839285  | 1571.73999 | 524.9206 | 1571.73157 | 524.917786 | 3 | 11 | 11.7565 | 11.02 |
| 14 | 38.47 | 42.47 | 48.1 CCNE1_FlexIII   | 99.0 KANVTVFLODPDEEMAK            | Label: 13C(6)15N(2)(K)@ 1; Label: 13C(6)15N(2)(K)@ 17                                                | missed K-A@ 1                 | 0.00113041  | 1949.97522 | 650.999  | 1949.97388 | 650.998596 | 3 | 19 | 15.4034 | 11.02 |
| 14 | 38.47 | 42.47 | 48.1 CCNE1_FlexIII   | 99.0 KANVTVFLODPDEEMAK            | Label: 13C(6)15N(2)(K)@ 1; Label: 13C(6)15N(2)(K)@ 17                                                | missed K-A@ 1                 | -0.00648071 | 1949.96753 | 975.991  | 1949.97388 | 975.994263 | 2 | 22 | 15.6133 | 11.02 |
| 14 | 38.47 | 42.47 | 48.1 CCNE1_FlexIII   | 99.0 KANVTVFLODPDEEMAK            | Label: 13C(6)15N(2)(K)@ 1; Label: 13C(6)15N(2)(K)@ 17                                                | missed K-A@ 1                 | 0.00076419  | 1949.97449 | 650.9988 | 1949.97388 | 650.998596 | 3 | 18 | 15.6821 | 11.02 |
| 14 | 38.47 | 42.47 | 48.1 CCNE1_FlexIII   | 99.0 KANVTVFLODPDEEMAK            | Label: 13C(6)15N(2)(K)@ 1; Label: 13C(6)15N(2)(K)@ 17                                                | missed K-A@ 1                 | 0.00644047  | 1949.98023 | 651.0007 | 1949.97388 | 650.998596 | 3 | 18 | 15.9437 | 11.02 |
| 14 | 38.47 | 42.47 | 48.1 CCNE1_FlexIII   | 99.0 KANVTVFLODPDEEMAK            | Label: 13C(6)15N(2)(K)@ 1; Label: 13C(6)15N(2)(K)@ 17                                                | missed K-A@ 1                 | -0.00106686 | 1949.9729  | 650.9982 | 1949.97388 | 650.998596 | 3 | 16 | 16.2062 | 11.02 |
| 14 | 38.47 | 42.47 | 48.1 CCNE1_FlexIII   | 99.0 KANVTVFLODPDEEMAK            | Label: 13C(6)15N(2)(K)@ 1; Label: 13C(6)15N(2)(K)@ 17                                                | missed K-A@ 1                 | 0.00644047  | 1949.98023 | 651.0007 | 1949.97388 | 650.998596 | 3 | 16 | 16.4673 | 11.02 |
| 14 | 38.47 | 42.47 | 48.1 CCNE1_FlexIII   | 99.0 KANVTVFLODPDEEMAK            | Label: 13C(6)15N(2)(K)@ 1; Deamidated(Q)@ 9; Label: 13C(6)15N(2)(K)@ 17                              | missed K-A@ 1                 | 0.012477    | 1950.97022 | 651.3307 | 1950.95789 | 651.326599 | 3 | 13 | 15.1228 | 11.02 |
| 14 | 38.47 | 42.47 | 48.1 CCNE1_FlexIII   | 99.0 KANVTVFLODPDEEMAKIDR         | Label: 13C(6)15N(2)(K)@ 1; Deamidated(Q)@ 9; Label: 13C(6)15N(2)(K)@ 17; Label: 13C(6)15N(4)(R)@ 20  | missed K-A@ 1; missed K-I@ 17 | 0.0352666   | 2345.21387 | 587.3107 | 2345.17822 | 587.30188  | 4 | 16 | 16.8302 | 11.02 |
| 14 | 38.47 | 42.47 | 48.1 CCNE1_FlexIII   | 99.0 KANVTVFLODPDEEMAKIDR         | Label: 13C(6)15N(2)(K)@ 1; Label: 13C(6)15N(2)(K)@ 17; Label: 13C(6)15N(4)(R)@ 20                    | missed K-A@ 1; missed K-I@ 17 | -5.77E-06   | 2344.19409 | 587.0558 | 2344.19434 | 587.055847 | 4 | 16 | 17.1095 | 11.02 |
| 14 | 38.47 | 42.47 | 48.1 CCNE1_FlexIII   | 99.0 KANVTVFLODPDEEMAKIDR         | Label: 13C(6)15N(2)(K)@ 1; Deamidated(Q)@ 9; Label: 13C(6)15N(2)(K)@ 17; Label: 13C(6)15N(4)(R)@ 20  | missed K-A@ 1; missed K-I@ 17 | 0.0223454   | 2345.20044 | 782.7408 | 2345.17822 | 782.733398 | 3 | 16 | 17.1609 | 11.02 |
| 14 | 38.47 | 42.47 | 48.1 CCNE1_FlexIII   | 99.0 KANVTVFLODPDEEMAKIDR         | Label: 13C(6)15N(2)(K)@ 1; Deamidated(Q)@ 9; Label: 13C(6)15N(2)(K)@ 17; Label: 13C(6)15N(4)(R)@ 20  | missed K-A@ 1; missed K-I@ 17 | 0.0352666   | 2345.21387 | 587.3107 | 2345.17822 | 587.30188  | 4 | 15 | 17.3719 | 11.02 |
| 14 | 38.47 | 42.47 | 48.1 CCNE1_FlexIII   | 99.0 KANVTVFLODPDEEMAKIDR         | Label: 13C(6)15N(2)(K)@ 1; Deamidated(Q)@ 9; Label: 13C(6)15N(2)(K)@ 17; Label: 13C(6)15N(4)(R)@ 20  | missed K-A@ 1; missed K-I@ 17 | 0.0352666   | 2345.21387 | 587.3107 | 2345.17822 | 587.30188  | 4 | 11 | 17.7002 | 11.02 |
| 14 | 38.47 | 42.47 | 48.1 CCNE1_FlexIII   | 99.0 TYLRDQHFLQHPPLQPK            | Label: 13C(6)15N(4)(R)@ 4; Deamidated(Q)@ 11; Label: 13C(6)15N(2)(K)@ 18                             | missed R-D@ 4                 | 0.0161216   | 2281.21387 | 571.3107 | 2281.19751 | 571.306641 | 4 | 12 | 17.7421 | 11.02 |
| 14 | 38.47 | 42.47 | 48.1 CCNE1_FlexIII   | 99.0 WMVPFAMVIR                   | Oxidation(M)@ 2; Label: 13C(6)15N(4)(R)@ 10                                                          |                               | 0.00199827  | 1274.65625 | 638.3354 | 1274.6543  | 638.334412 | 2 | 11 | 17.868  | 11.02 |
| 14 | 38.47 | 42.47 | 48.1 CCNE1_FlexIII   | 99.0 WMVPFAMVIR                   | Label: 13C(6)15N(4)(R)@ 10                                                                           |                               | 0.00751938  | 1258.66711 | 630.3408 | 1258.65942 | 630.336975 | 2 | 9  | 18.2661 | 11.02 |
| 14 | 38.47 | 42.47 | 48.1 CCNE1_FlexIII   | 99.0 YPTFLYK                      | Label: 13C(6)15N(2)(K)@ 7                                                                            | cleaved A-Y@ N-term           | 0.00057017  | 938.499878 | 470.2572 | 938.499329 | 470.256928 | 2 | 9  | 15.0367 | 11.02 |
| 14 | 38.47 | 42.47 | 48.1 CCNE1_FlexIII   | 99.0 YPTFLYK                      | Label: 13C(6)15N(2)(K)@ 7                                                                            | cleaved A-Y@ N-term           | 0.00819955  | 938.507446 | 470.261  | 938.499329 | 470.256928 | 2 | 9  | 14.7754 | 11.02 |
| 14 | 38.47 | 42.47 | 48.1 CCNE1_FlexIII   | 99.0 YPTFLYK                      | Label: 13C(6)15N(2)(K)@ 7                                                                            | cleaved A-Y@ N-term           | 0.00073716  | 938.500661 | 470.2573 | 938.499329 | 470.256928 | 2 | 9  | 15.0782 | 11.02 |
| 14 | 38.47 | 42.47 | 48.1 CCNE1_FlexIII   | 99.0 YPTFLYK                      | Label: 13C(6)15N(2)(K)@ 7                                                                            | cleaved A-Y@ N-term           | 0.00092027  | 938.500244 | 470.2574 | 938.499329 | 470.256928 | 2 | 9  | 14.8156 | 11.02 |
| 15 | 38    | 42.06 | 61.3 CCDC132_FlexIII | 99.0 EGFTQASGLLLANQR              |                                                                                                      |                               | 0.00324814  | 1603.83508 | 802.9248 | 1603.83179 | 802.923157 | 2 | 19 | 15.6319 | 8.81  |
| 15 | 38    | 42.06 | 61.3 CCDC132_FlexIII | 99.0 EQPSDPQAEQLINSIEQVVSDFSFDIVK | Deamidated(N)@ 14; Label: 13C(6)15N(2)(K)@ 30                                                        |                               | 0.026224    | 3462.67114 | 1155.231 | 3462.64453 | 1155.22217 | 3 | 15 | 18.0976 | 8.81  |
| 15 | 38    | 42.06 | 61.3 CCDC132_FlexIII | 99.0 HYSICSELSNK                  | Propionamide(C)@ 4; Label: 13C(6)15N(2)(K)@ 11                                                       |                               | -0.00023672 | 1358.63782 | 680.3262 | 1358.63794 | 680.326294 | 2 | 18 | 12.4719 | 8.81  |
| 15 | 38    | 42.06 | 61.3 CCDC132_FlexIII | 99.0 KVADILEK                     | Label: 13C(6)15N(4)(R)@ 1; Label: 13C(6)15N(2)(K)@ 9                                                 | missed K-V@ 1                 | -0.00019137 | 1043.65613 | 522.8353 | 1043.65613 | 522.835327 | 2 | 14 | 13.6911 | 8.81  |
| 15 | 38    | 42.06 | 61.3 CCDC132_FlexIII | 99.0 LPPVLNLQELEAYR               | Label: 13C(6)15N(4)(R)@ 14                                                                           |                               | 0.0007887   | 1663.91797 | 555.6466 | 1663.91724 | 555.646362 | 3 | 17 | 16.6629 | 8.81  |
| 15 | 38    | 42.06 | 61.3 CCDC132_FlexIII | 99.0 LPPVLNLQELEAYRDK             | Label: 13C(6)15N(4)(R)@ 14; Label: 13C(6)15N(2)(K)@ 16                                               |                               | 0.00126541  | 1915.05469 | 639.3588 | 1915.05335 | 639.358398 | 3 | 14 | 15.9209 | 8.81  |
| 15 | 38    | 42.06 | 61.3 CCDC132_FlexIII | 99.0 LQDTLEQIEQLDVALSK            |                                                                                                      |                               | -0.0014276  | 2071.06738 | 1036.541 | 2071.06836 | 1036.5415  | 2 | 23 | 17.9049 | 8.81  |
| 15 | 38    | 42.06 | 61.3 CCDC132_FlexIII | 99.0 LSEMLEEEDYPGAIQLCLECQK       | Propionamide(C)@ 17; Propionamide(C)@ 20; Label: 13C(6)15N(2)(K)@ 22                                 |                               | -0.00261765 | 2690.2334  | 1346.124 | 2690.23682 | 1346.12573 | 2 | 21 | 16.2524 | 8.81  |
| 15 | 38    | 42.06 | 61.3 CCDC132_FlexIII | 99.0 NFDINHYYK                    | Label: 13C(6)15N(2)(K)@ 9                                                                            |                               | 0.0109545   | 1158.56592 | 580.2902 | 1158.55943 | 580.284729 | 2 | 11 | 13.1248 | 8.81  |
| 15 | 38    | 42.06 | 61.3 CCDC132_FlexIII | 99.0 QGLKSPQESLSDLGAIESLR         | Gln->pyro-Glu@ N-term; Label: 13C(6)15N(2)(K)@ 4; Label: 13C(6)15N(4)(R)@ 20                         | missed K-S@ 4                 | 0.00626504  | 2128.11939 | 710.3804 | 2128.11304 | 710.378296 | 3 | 21 | 16.1622 | 8.81  |
| 15 | 38    | 42.06 | 61.3 CCDC132_FlexIII | 99.0 QLLIGLKK                     | Gln->pyro-Glu@ N-term; Label: 13C(6)15N(2)(K)@ 8                                                     |                               | -0.00051015 | 887.593079 | 444.8038 | 887.593567 | 444.804047 | 2 | 10 | 18.093  | 8.81  |
| 15 | 38    | 42.06 | 61.3 CCDC132_FlexIII | 99.0 SPQESLSDLGAIESLR             |                                                                                                      |                               | -0.00692284 | 1700.85132 | 851.4329 | 1700.85815 | 851.43634  | 2 | 19 | 15.7892 | 8.81  |
| 15 | 38    | 42.06 | 61.3 CCDC132_FlexIII | 99.0 SPQESLSDLGAIESLRVPGK         | Label: 13C(6)15N(4)(R)@ 16; Label: 13C(6)15N(2)(K)@ 20                                               | missed R-V@ 16                | 0.011096    | 2100.1294  | 701.0504 | 2100.11816 | 701.046692 | 3 | 20 | 15.5873 | 8.81  |
| 15 | 38    | 42.06 | 61.3 CCDC132_FlexIII | 99.0 VTSLQTLGLQLAAVICTNGR         | Propionamide(C)@ 15; Label: 13C(6)15N(4)(R)@ 19                                                      |                               | -0.00473117 | 2025.08752 | 1013.551 | 2025.08752 | 1013.5531  | 2 | 20 | 16.7867 | 8.81  |
| 15 | 38    | 42.06 | 61.3 CCDC132_FlexIII | 99.0 YELEKLPPVLNLQELEAYR          | Label: 13C(6)15N(2)(K)@ 5; Label: 13C(6)15N(4)(R)@ 19                                                | missed K-L@ 5                 | 0.00829151  | 2334.26733 | 1168.141 | 2334.25903 | 1168.13684 | 2 | 17 | 16.9038 | 8.81  |
| 15 | 38    | 42.06 | 61.3 CCDC132_FlexIII | 99.0 YELEKLPPVLNLQELEAYRDK        | Label: 13C(6)15N(2)(K)@ 5; Deamidated(N)@ 11; Label: 13C(6)15N(4)(R)@ 19; Label: 13C(6)15N(2)(K)@ 21 | missed K-L@ 5; missed R-D@ 19 | 0.0329554   | 2586.41211 | 647.6103 | 2586.37915 | 647.602051 | 4 | 14 | 16.7799 | 8.81  |
| 15 | 38    | 42.06 | 61.3 CCDC132_FlexIII | 99.0 EGFTQASGLLLANQR              | Label: 13C(6)15N(4)(R)@ 15                                                                           |                               | -0.0113149  | 1613.82874 | 538.9502 | 1613.84009 | 538.95398  | 3 | 16 | 15.576  | 8.81  |
| 15 | 38    | 42.06 | 61.3 CCDC132_FlexIII | 99.0 EGFTQASGLLLANQR              | Label: 13C(6)15N(4)(R)@ 15                                                                           |                               | 0.00011778  | 1613.84033 | 807.9274 | 1613.84009 | 807.927307 | 2 | 18 | 15.8095 | 8.81  |
| 15 | 38    | 42.06 | 61.3 CCDC132_FlexIII | 99.0 EGFTQASGLLLANQR              | Label: 13C(6)15N(4)(R)@ 15                                                                           |                               | 0.00097227  | 1613.84106 | 807.9278 | 1613.84009 | 807.927307 | 2 | 14 | 24.4523 | 8.81  |
| 15 | 38    | 42.06 | 61.3 CCDC132_FlexIII | 99.0 EGFTQASGLLLANQR              | Deamidated(Q)@ 5; Label: 13C(6)15N(4)(R)@ 15                                                         |                               | 0.022329    | 1614.84644 | 808.4305 | 1614.8241  | 808.419312 | 2 | 13 | 15.5462 | 8.81  |
| 15 | 38    | 42.06 | 61.3 CCDC132_FlexIII | 99.0 EGFTQASGLLLANQR              | Label: 13C(6)15N(4)(R)@ 15                                                                           |                               | 0.00040385  | 1613.84045 | 538.9541 | 1613.84009 | 538.95398  | 3 | 12 | 15.8376 | 8.81  |
| 15 | 38    | 42.06 | 61.3 CCDC132_FlexIII | 99.0 HYSICSELSNK                  | Propionamide(C)@ 4; Label: 13C(6)15N(2)(K)@ 11                                                       |                               | 0.0013502   | 1358.63953 | 680.327  | 1358.63794 | 680.326294 | 2 | 17 | 12.7383 | 8.81  |
| 15 | 38    | 42.06 | 61.3 CCDC132_FlexIII | 99.0 HYSICSELSNK                  | Propionamide(C)@ 4; Label: 13C(6)15N(2)(K)@ 11                                                       |                               | 0.0104864   | 1358.64844 | 453.8901 | 1358.63794 | 453.886597 | 3 | 13 | 12.4491 | 8.81  |
| 15 | 38    | 42.06 | 61.3 CCDC132_FlexIII | 99.0 LPPVLNLQELEAYR               | Label: 13C(6)15N(4)(R)@ 14                                                                           |                               | 0.00916962  | 1663.92651 | 832.9705 | 1663.91724 | 832.965942 | 2 | 17 | 16.6368 | 8.81  |
| 15 | 38    | 42.06 | 61.3 CCDC132_FlexIII | 99.0 LPPVLNLQELEAYR               | Label: 13C(6)15N(4)(R)@ 14                                                                           |                               | 0.00196747  | 1663.91931 | 832.9669 | 1663.91724 | 832.965942 | 2 | 19 | 16.9125 | 8.81  |
| 15 | 38    | 42.06 | 61.3 CCDC132_FlexIII | 99.0 LPPVLNLQELEAYR               | Label: 13C(6)15N(4)(R)@ 14                                                                           |                               | 0.00225354  | 1663.91943 | 555.6471 | 1663.91724 | 555.646362 | 3 | 15 | 16.9436 | 8.81  |
| 15 | 38    | 42.06 | 61.3 CCDC132_FlexIII | 99.0 LPPVLNLQELEAYRDK             | Label: 13C(6)15N(4)(R)@ 14; Label: 13C(6)15N(2)(K)@ 16                                               | missed R-D@ 14                | 0.00565995  | 1915.05908 | 639.3603 | 1915.05335 | 639.358398 | 3 | 14 | 16.2021 | 8.81  |
| 15 | 38    | 42.06 | 61.3 CCDC132_FlexIII | 99.0 LQDTLEQIEQLDVALSK            | Label: 13C(6)15N(2)(K)@ 18                                                                           |                               | -0.00086589 | 2079.08154 | 694.0345 | 2079.08276 | 694.034851 | 3 | 17 | 17.7399 | 8.81  |
| 15 | 38    | 42.06 | 61.3 CCDC132_FlexIII | 99.0 LQDTLEQIEQLDVALSK            | Label: 13C(6)15N(2)(K)@ 18                                                                           |                               | 0.00440224  | 2079.0874  | 1040.551 | 2079.08276 | 1040.54858 | 2 | 26 | 17.8429 | 8.81  |
| 15 | 38    | 42.06 | 61.3 CCDC132_FlexIII | 99.0 LQDTLEQIEQLDVALSK            | Label: 13C(6)15N(2)(K)@ 18                                                                           |                               | 0.00078206  | 2079.0835  | 694.0351 | 2079.08276 | 694.034851 | 3 | 19 | 18.0003 | 8.81  |
| 15 | 38    | 42.06 | 61.3 CCDC132_FlexIII | 99.0 LQDTLEQIEQLDVALSK            | Label: 13C(6)15N(2)(K)@ 18                                                                           |                               | 0.00440224  | 2079.0874  | 1040.551 | 2079.08276 | 1040.54858 | 2 | 21 | 18.11   | 8.81  |
| 15 | 38    | 42.06 | 61.3 CCDC132_FlexIII | 99.0 LQDTLEQIEQLDVALSK            | Deamidated(Q)@ 7; Label: 13C(6)15N(2)(K)@ 18                                                         |                               | 0.0203878   | 2080.0874  | 1041.051 | 2080.06665 | 1041.04065 | 2 | 15 | 18.3705 | 8.81  |
| 15 | 38    | 42.06 | 61.3 CCDC132_FlexIII | 99.0 LQDTLEQIEQLDVALSK            | Deamidated(Q)@ 7; Label: 13C(6)15N(2)(K)@ 18                                                         |                               | 0.022566    | 2080.08936 | 694.3704 | 2080.06665 | 694.326854 | 3 | 11 | 18.3144 | 8.81  |
| 15 | 38    | 42.06 | 61.3 CCDC132_FlexIII | 99.0 LSEMLEEEDYPGAIQLCLECQK       | Propionamide(C)@ 17; Propionamide(C)@ 20; Label: 13C(6)15N(2)(K)@ 22                                 |                               | 0.00617142  | 2690.24341 | 1346.129 | 2690.23682 | 1346.12573 | 2 | 24 | 15.9737 | 8.81  |
| 15 | 38    | 42.06 | 61.3 CCDC132_FlexIII | 99.0 LSEMLEEEDYPGAIQLCLECQK       | Deamidated(Q)@ 15; Propionamide(C)@ 17; Propionamide(C)@ 20; Label: 13C(6)15N(2)(K)@ 22              |                               | 0.0291569   | 2691.25    | 898.0906 | 2691.22095 | 898.080933 | 3 | 20 | 16.2547 | 8.81  |
| 15 | 38    | 42.06 | 61.3 CCDC132_FlexIII | 99.0 LYPTFLYK                     | Label: 13C(6)15N(2)(K)@ 8                                                                            | cleaved L-L@ N-term           | -0.00022118 | 1051.58313 | 526.7988 | 1051.58337 | 526.79895  | 2 | 9  | 15.3795 | 8.81  |
| 15 | 38    | 42.06 | 61.3 CCDC132_FlexIII | 99.0 QGLKSPQESLSDLGAIESLR         | Label: 13C(6)15N(2)(K)@ 4; Deamidated(Q)@ 7; Label: 13C(6)15N(4)(R)@ 20                              | missed K-S@ 4                 | 0.0257505   | 2146.14941 | 716.3904 | 2          |            |   |    |         |       |

|    |       |       |                      |                                       |                                                                                                                  |                     |             |            |            |            |            |    |         |         |       |
|----|-------|-------|----------------------|---------------------------------------|------------------------------------------------------------------------------------------------------------------|---------------------|-------------|------------|------------|------------|------------|----|---------|---------|-------|
| 15 | 38    | 42.06 | 61.3 CCDC132_FlexIII | 99.0 VTSLQTLGQLAAVICTNGR              | Propionamide(C) @15; Deamidated(N) @17; Label:13C(6)15N(4)(R) @19                                                | 0.0135546           | 2026.08948  | 676.3704   | 2026.07568 | 676.365845 | 3          | 17 | 24.4648 | 8.81    |       |
| 15 | 38    | 42.06 | 61.3 CCDC132_FlexIII | 99.0 YELEKLPVVLNLQEELEYR              | Label:13C(6)15N(2)(K) @5; Deamidated(N) @11; Label:13C(6)15N(4)(R) @19                                           | misses K-L @5       | 0.0265163   | 2335.26953 | 779.4305   | 2335.24292 | 779.421631 | 3  | 18      | 16.7108 | 8.81  |
| 15 | 38    | 42.06 | 61.3 CCDC132_FlexIII | 99.0 YELEKLPVVLNLQEELEYR              | Label:13C(6)15N(2)(K) @5; Deamidated(N) @11; Label:13C(6)15N(4)(R) @19                                           | misses K-L @5       | 0.0265163   | 2335.26953 | 779.4305   | 2335.24292 | 779.421631 | 3  | 18      | 16.9682 | 8.81  |
| 15 | 38    | 42.06 | 61.3 CCDC132_FlexIII | 99.0 YPTFLYK                          | Label:13C(6)15N(2)(K) @7                                                                                         | cleaved L-Y @N-term | 0.00057017  | 938.499878 | 470.2572   | 938.499329 | 470.256928 | 2  | 9       | 15.0367 | 8.81  |
| 15 | 38    | 42.06 | 61.3 CCDC132_FlexIII | 99.0 YPTFLYK                          | Label:13C(6)15N(2)(K) @7                                                                                         | cleaved L-Y @N-term | 0.00819955  | 938.507446 | 470.261    | 938.499329 | 470.256928 | 2  | 9       | 14.7754 | 8.81  |
| 15 | 38    | 42.06 | 61.3 CCDC132_FlexIII | 99.0 YPTFLYK                          | Label:13C(6)15N(2)(K) @7                                                                                         | cleaved L-Y @N-term | 0.00073716  | 938.500061 | 470.2573   | 938.499329 | 470.256928 | 2  | 9       | 15.0782 | 8.81  |
| 15 | 38    | 42.06 | 61.3 CCDC132_FlexIII | 99.0 YPTFLYK                          | Label:13C(6)15N(2)(K) @7                                                                                         | cleaved L-Y @N-term | 0.00092027  | 938.500244 | 470.2574   | 938.499329 | 470.256928 | 2  | 9       | 14.8156 | 8.81  |
| 16 | 34.39 | 36.39 | 70.4 HAVCR2_FlexIII  | 99.0 AEVGQNAVLPFCFYTPAAGNLVPVCWGK     | Propionamide(C) @11; Propionamide(C) @25; Label:13C(6)15N(2)(K) @28                                              |                     | -0.00600426 | 3114.51221 | 1039.178   | 3114.51188 | 1039.18018 | 3  | 22      | 17.4326 | 14.84 |
| 16 | 34.39 | 36.39 | 70.4 HAVCR2_FlexIII  | 99.0 DFTAAPFR                         | Label:13C(6)15N(4)(R) @8                                                                                         |                     | -0.00034833 | 933.458069 | 467.7363   | 933.458374 | 467.736481 | 2  | 8       | 15.0212 | 14.84 |
| 16 | 34.39 | 36.39 | 70.4 HAVCR2_FlexIII  | 99.0 DVNYWTSR                         | Label:13C(6)15N(4)(R) @8                                                                                         |                     | 0.00422241  | 1049.48486 | 525.7497   | 1049.48059 | 525.747559 | 2  | 9       | 13.95   | 14.84 |
| 16 | 34.39 | 36.39 | 70.4 HAVCR2_FlexIII  | 99.0 FAMPYPTFLYK                      | Label:13C(6)15N(2)(K) @11                                                                                        |                     | -0.00113234 | 1384.69702 | 693.3558   | 1384.69812 | 693.356323 | 2  | 12      | 17.223  | 14.84 |
| 16 | 34.39 | 36.39 | 70.4 HAVCR2_FlexIII  | 99.0 GACPVFEGCNVVLNR                  | Propionamide(C) @3; Propionamide(C) @8                                                                           |                     | -0.0165164  | 1604.76392 | 803.3892   | 1604.78027 | 803.397461 | 2  | 14      | 15.2522 | 14.84 |
| 16 | 34.39 | 36.39 | 70.4 HAVCR2_FlexIII  | 99.0 GHGPAETQTLGSLPDINTLQISTLANELR    | Label:13C(6)15N(4)(R) @29                                                                                        |                     | 0.0002134   | 3055.58008 | 1019.534   | 3055.5813  | 1019.53442 | 3  | 28      | 17.807  | 14.84 |
| 16 | 34.39 | 36.39 | 70.4 HAVCR2_FlexIII  | 99.0 GHGPAETQTLGSLPDINTLQISTLANELRDSR | Deamidated(N) @17; Label:13C(6)15N(4)(R) @29; Label:13C(6)15N(4)(R) @32                                          | misses R-D @29      | 0.0334665   | 3424.76733 | 857.1991   | 3424.73364 | 857.190735 | 4  | 13      | 17.8561 | 14.84 |
| 16 | 34.39 | 36.39 | 70.4 HAVCR2_FlexIII  | 99.0 IQIPGIMNDEKFNK                   | Label:13C(6)15N(2)(K) @11; Label:13C(6)15N(2)(K) @15                                                             | misses K-F @11      | -0.00295237 | 1774.95923 | 888.4869   | 1774.96228 | 888.488403 | 2  | 13      | 17.036  | 14.84 |
| 16 | 34.39 | 36.39 | 70.4 HAVCR2_FlexIII  | 99.0 IQNLISLISLANPPSGLANAVAEGIR       | Label:13C(6)15N(4)(R) @26                                                                                        |                     | 0.00511569  | 2640.48926 | 1321.252   | 2640.48389 | 1321.24915 | 2  | 27      | 18.1386 | 14.84 |
| 16 | 34.39 | 36.39 | 70.4 HAVCR2_FlexIII  | 99.0 KGDVSLTIENVTLADSGIYCCR           | Label:13C(6)15N(2)(K) @1; Propionamide(C) @20; Propionamide(C) @21; Label:13C(6)15N(4)(R) @22                    | misses K-G @1       | -0.0115212  | 2516.22534 | 839.7491   | 2516.23706 | 839.75293  | 3  | 22      | 17.2488 | 14.84 |
| 16 | 34.39 | 36.39 | 70.4 HAVCR2_FlexIII  | 99.0 LANDLRDSDGATIR                   | Label:13C(6)15N(4)(R) @6; Label:13C(6)15N(4)(R) @13                                                              | misses R-D @6       | -0.00960589 | 1420.74402 | 711.3793   | 1420.75378 | 711.384155 | 2  | 14      | 12.7234 | 14.84 |
| 16 | 34.39 | 36.39 | 70.4 HAVCR2_FlexIII  | 99.0 LVIKPAK                          | Label:13C(6)15N(2)(K) @4; Label:13C(6)15N(2)(K) @7                                                               |                     | -0.00802221 | 783.554443 | 392.7845   | 783.555294 | 392.784943 | 2  | 8       | 11.7928 | 14.84 |
| 16 | 34.39 | 36.39 | 70.4 HAVCR2_FlexIII  | 99.0 QQPSQLGCR                        | Propionamide(C) @9                                                                                               |                     | -0.00105229 | 1183.57593 | 592.7952   | 1183.57678 | 592.795654 | 2  | 11      | 11.857  | 14.84 |
| 16 | 34.39 | 36.39 | 70.4 HAVCR2_FlexIII  | 99.0 SEENYITIEENVYEEPEEYCYVSSR        | Deamidated(N) @11; Propionamide(C) @23; Label:13C(6)15N(4)(R) @28                                                |                     | 0.00741193  | 3531.51221 | 1178.178   | 3531.50635 | 1178.17603 | 3  | 21      | 16.5538 | 14.84 |
| 16 | 34.39 | 36.39 | 70.4 HAVCR2_FlexIII  | 99.0 TDERDVNYWTSR                     | Label:13C(6)15N(4)(R) @4; Label:13C(6)15N(4)(R) @12                                                              | misses R-D @4       | -0.00997645 | 1560.69727 | 521.2397   | 1560.70715 | 521.242981 | 3  | 14      | 13.4763 | 14.84 |
| 16 | 34.39 | 36.39 | 70.4 HAVCR2_FlexIII  | 99.0 VTPAPTQLR                        | Label:13C(6)15N(4)(R) @9                                                                                         |                     | -0.00047329 | 991.568481 | 496.7915   | 991.56897  | 496.791779 | 2  | 9       | 12.3788 | 14.84 |
| 16 | 34.39 | 36.39 | 70.4 HAVCR2_FlexIII  | 99.0 YWLNGDFR                         | Label:13C(6)15N(4)(R) @8                                                                                         |                     | -0.00163445 | 1079.50464 | 540.7596   | 1079.50635 | 540.760498 | 2  | 9       | 16.0667 | 14.84 |
| 16 | 34.39 | 36.39 | 70.4 HAVCR2_FlexIII  | 99.0 AEVGQNAVLPFCFYTPAAGNLVPVCWGK     | Propionamide(C) @11; Deamidated(N) @20; Propionamide(C) @25; Label:13C(6)15N(2)(K) @28                           |                     | 0.0317068   | 3115.5354  | 1039.519   | 3115.50269 | 1039.50818 | 3  | 16      | 17.1763 | 14.84 |
| 16 | 34.39 | 36.39 | 70.4 HAVCR2_FlexIII  | 99.0 AEVGQNAVLPFCFYTPAAGNLVPVCWGK     | Propionamide(C) @11; Propionamide(C) @25; Label:13C(6)15N(2)(K) @28                                              |                     | -0.00270837 | 3114.51514 | 1039.179   | 3114.51188 | 1039.18018 | 3  | 17      | 17.699  | 14.84 |
| 16 | 34.39 | 36.39 | 70.4 HAVCR2_FlexIII  | 99.0 FAMPYPTFLYK                      | Label:13C(6)15N(2)(K) @11                                                                                        |                     | -0.0008882  | 1384.69727 | 693.3559   | 1384.69812 | 693.356323 | 2  | 12      | 17.8002 | 14.84 |
| 16 | 34.39 | 36.39 | 70.4 HAVCR2_FlexIII  | 99.0 FAMPYPTFLYK                      | Label:13C(6)15N(2)(K) @11                                                                                        |                     | -0.00174269 | 1384.69653 | 693.3555   | 1384.69812 | 693.356323 | 2  | 11      | 17.486  | 14.84 |
| 16 | 34.39 | 36.39 | 70.4 HAVCR2_FlexIII  | 99.0 FAMPYPTFLYK                      | Label:13C(6)15N(2)(K) @11                                                                                        |                     | -0.0010787  | 1376.68286 | 689.3487   | 1376.68394 | 689.349243 | 2  | 11      | 17.566  | 14.84 |
| 16 | 34.39 | 36.39 | 70.4 HAVCR2_FlexIII  | 99.0 FAMPYPTFLYK                      | Label:13C(6)15N(2)(K) @11                                                                                        |                     | -0.00149855 | 1384.69666 | 693.3556   | 1384.69812 | 693.356323 | 2  | 10      | 17.5178 | 14.84 |
| 16 | 34.39 | 36.39 | 70.4 HAVCR2_FlexIII  | 99.0 FAMPYPTFLYK                      | Label:13C(6)15N(2)(K) @11                                                                                        |                     | -0.00015578 | 1384.69812 | 693.3563   | 1384.69812 | 693.356323 | 2  | 10      | 18.0569 | 14.84 |
| 16 | 34.39 | 36.39 | 70.4 HAVCR2_FlexIII  | 99.0 FAMPYPTFLYK                      | Label:13C(6)15N(2)(K) @11                                                                                        |                     | -0.00125441 | 1384.6969  | 693.3557   | 1384.69812 | 693.356323 | 2  | 10      | 18.3122 | 14.84 |
| 16 | 34.39 | 36.39 | 70.4 HAVCR2_FlexIII  | 99.0 GACPVFEGCNVVLNR                  | Propionamide(C) @3; Propionamide(C) @8; Label:13C(6)15N(4)(R) @14                                                |                     | -0.00197671 | 1614.78662 | 808.4006   | 1614.78857 | 808.40155  | 2  | 16      | 15.2535 | 14.84 |
| 16 | 34.39 | 36.39 | 70.4 HAVCR2_FlexIII  | 99.0 GACPVFEGCNVVLNR                  | Propionamide(C) @3; Propionamide(C) @8; Label:13C(6)15N(4)(R) @14                                                |                     | -0.00441811 | 1614.7843  | 808.3994   | 1614.78857 | 808.40155  | 2  | 15      | 15.5087 | 14.84 |
| 16 | 34.39 | 36.39 | 70.4 HAVCR2_FlexIII  | 99.0 GACPVFEGCNVVLNR                  | Propionamide(C) @3; Propionamide(C) @8; Label:13C(6)15N(4)(R) @14                                                |                     | -0.00478432 | 1614.78381 | 808.3992   | 1614.78857 | 808.40155  | 2  | 11      | 16.0842 | 14.84 |
| 16 | 34.39 | 36.39 | 70.4 HAVCR2_FlexIII  | 99.0 GHGPAETQTLGSLPDINTLQISTLANELR    | Deamidated(N) @17; Label:13C(6)15N(4)(R) @29                                                                     |                     | 0.00254827  | 3056.56763 | 765.1492   | 3056.56543 | 765.148621 | 4  | 17      | 17.8411 | 14.84 |
| 16 | 34.39 | 36.39 | 70.4 HAVCR2_FlexIII  | 99.0 GHGPAETQTLGSLPDINTLQISTLANELRDSR | Deamidated(N) @26; Label:13C(6)15N(4)(R) @29; Label:13C(6)15N(4)(R) @32                                          | misses R-D @29      | 0.00994382  | 3424.74512 | 1142.589   | 3424.73364 | 1142.58521 | 3  | 12      | 17.9419 | 14.84 |
| 16 | 34.39 | 36.39 | 70.4 HAVCR2_FlexIII  | 99.0 IQIPGIMNDEKFNK                   | Label:13C(6)15N(2)(K) @11; Label:13C(6)15N(2)(K) @15                                                             | misses K-F @11      | -0.00197581 | 1774.96033 | 888.4874   | 1774.96228 | 888.488403 | 2  | 14      | 17.2969 | 14.84 |
| 16 | 34.39 | 36.39 | 70.4 HAVCR2_FlexIII  | 99.0 IQIPGIMNDEKFNK                   | Label:13C(6)15N(2)(K) @11; Label:13C(6)15N(2)(K) @15                                                             | misses K-F @11      | -0.00549169 | 1774.95667 | 592.6595   | 1774.96228 | 592.661377 | 3  | 12      | 16.6973 | 14.84 |
| 16 | 34.39 | 36.39 | 70.4 HAVCR2_FlexIII  | 99.0 IQIPGIMNDEKFNK                   | Label:13C(6)15N(2)(K) @11; Label:13C(6)15N(2)(K) @15                                                             | misses K-F @11      | -0.0036475  | 1774.96216 | 592.6613   | 1774.96228 | 592.661377 | 3  | 12      | 16.9611 | 14.84 |
| 16 | 34.39 | 36.39 | 70.4 HAVCR2_FlexIII  | 99.0 IQIPGIMNDEKFNK                   | Label:13C(6)15N(2)(K) @11; Label:13C(6)15N(2)(K) @15                                                             | misses K-F @11      | -0.00091407 | 1774.96143 | 592.6611   | 1774.96228 | 592.661377 | 3  | 12      | 17.2205 | 14.84 |
| 16 | 34.39 | 36.39 | 70.4 HAVCR2_FlexIII  | 99.0 IQIPGIMNDEKFNK                   | Label:13C(6)15N(2)(K) @11; Label:13C(6)15N(2)(K) @15                                                             | misses K-F @11      | -0.00128028 | 1774.96082 | 592.6609   | 1774.96228 | 592.661377 | 3  | 12      | 17.4873 | 14.84 |
| 16 | 34.39 | 36.39 | 70.4 HAVCR2_FlexIII  | 99.0 IQIPGIMNDEKFNK                   | Label:13C(6)15N(2)(K) @11; Label:13C(6)15N(2)(K) @15                                                             | misses K-F @11      | -0.00549169 | 1774.95667 | 592.6595   | 1774.96228 | 592.661377 | 3  | 12      | 17.7482 | 14.84 |
| 16 | 34.39 | 36.39 | 70.4 HAVCR2_FlexIII  | 99.0 IQIPGIMNDEKFNK                   | Label:13C(6)15N(2)(K) @11; Label:13C(6)15N(2)(K) @15                                                             | misses K-F @11      | -0.00549169 | 1774.95667 | 592.6595   | 1774.96228 | 592.661377 | 3  | 11      | 16.426  | 14.84 |
| 16 | 34.39 | 36.39 | 70.4 HAVCR2_FlexIII  | 99.0 IQNLISLISLANPPSGLANAVAEGIR       | Deamidated(N) @11; Label:13C(6)15N(4)(R) @26                                                                     |                     | 0.0140182   | 2641.48145 | 1321.748   | 2641.46777 | 1321.74121 | 2  | 22      | 17.8606 | 14.84 |
| 16 | 34.39 | 36.39 | 70.4 HAVCR2_FlexIII  | 99.0 IQNLISLISLANPPSGLANAVAEGIR       | Label:13C(6)15N(4)(R) @26                                                                                        |                     | 0.00556708  | 2640.4895  | 881.1704   | 2640.48389 | 881.168579 | 3  | 22      | 18.1363 | 14.84 |
| 16 | 34.39 | 36.39 | 70.4 HAVCR2_FlexIII  | 99.0 KGDVSLTIENVTLADSGIYCCR           | Label:13C(6)15N(2)(K) @1; Propionamide(C) @20; Propionamide(C) @21; Label:13C(6)15N(4)(R) @22                    | misses K-G @1       | -0.0115212  | 2516.22534 | 839.7491   | 2516.23706 | 839.75293  | 3  | 24      | 16.7063 | 14.84 |
| 16 | 34.39 | 36.39 | 70.4 HAVCR2_FlexIII  | 99.0 KGDVSLTIENVTLADSGIYCCR           | Label:13C(6)15N(2)(K) @1; Propionamide(C) @20; Propionamide(C) @21; Label:13C(6)15N(4)(R) @22                    | misses K-G @1       | -0.00367183 | 2516.2334  | 1259.124   | 2516.23706 | 1259.12573 | 2  | 25      | 16.8912 | 14.84 |
| 16 | 34.39 | 36.39 | 70.4 HAVCR2_FlexIII  | 99.0 KGDVSLTIENVTLADSGIYCCR           | Label:13C(6)15N(2)(K) @1; Propionamide(C) @20; Propionamide(C) @21; Label:13C(6)15N(4)(R) @22                    | misses K-G @1       | -0.00309837 | 2516.23389 | 839.7519   | 2516.23706 | 839.75293  | 3  | 24      | 16.9855 | 14.84 |
| 16 | 34.39 | 36.39 | 70.4 HAVCR2_FlexIII  | 99.0 KGDVSLTIENVTLADSGIYCCR           | Label:13C(6)15N(2)(K) @1; Deamidated(N) @10; Propionamide(C) @20; Propionamide(C) @21; Label:13C(6)15N(4)(R) @22 | misses K-G @1       | 0.0245419   | 2517.24561 | 840.0891   | 2517.22095 | 840.080933 | 3  | 16      | 17.5163 | 14.84 |
| 16 | 34.39 | 36.39 | 70.4 HAVCR2_FlexIII  | 99.0 KGDVSLTIENVTLADSGIYCCR           | Label:13C(6)15N(2)(K) @1; Propionamide(C) @20; Propionamide(C) @21; Label:13C(6)15N(4)(R) @22                    | misses K-G @1       | 0.018508    | 2516.25537 | 839.7591   | 2516.23706 | 839.75293  | 3  | 11      | 25.0163 | 14.84 |
| 16 | 34.39 | 36.39 | 70.4 HAVCR2_FlexIII  | 99.0 QQPSQLGCR                        | Propionamide(C) @9; Label:13C(6)15N(4)(R) @10                                                                    |                     | -0.00055063 | 1193.58472 | 597.7996   | 1193.58508 | 597.799805 | 2  | 11      | 11.8349 | 14.84 |
| 16 | 34.39 | 36.39 | 70.4 HAVCR2_FlexIII  | 99.0 QQPSQLGCR                        | Propionamide(C) @9; Label:13C(6)15N(4)(R) @10                                                                    |                     | -0.00055063 | 1193.58472 | 597.7996   | 1193.58508 | 597.799805 | 2  | 10      | 12.0942 | 14.84 |
| 16 | 34.39 | 36.39 | 70.4 HAVCR2_FlexIII  | 99.0 QQPSQLGCR                        | Gln->pyro-Glu @N-term; Propionamide(C) @9; Label:13C(6)15N(4)(R) @10                                             |                     | -0.00155789 | 1176.55713 | 589.2858   | 1176.55847 | 589.28656  | 2  | 11      | 12.7971 | 14.84 |
| 16 | 34.39 | 36.39 | 70.4 HAVCR2_FlexIII  | 99.0 QQPSQLGCR                        | Gln->pyro-Glu @N-term; Propionamide(C) @9; Label:13C(6)15N(4)(R) @10                                             |                     | -0.00351102 | 1176.55505 | 589.2848   | 1176.55847 | 589.28656  | 2  | 11      | 13.0639 | 14.84 |
| 16 | 34.39 | 36.39 | 70.4 HAVCR2_FlexIII  | 99.0 TDERDVNYWTSR                     | Label:13C(6)15N(4)(R) @4; Label:13C(6)15N(4)(R) @12                                                              | misses R-D @4       | -0.00334778 | 1560.70386 | 781.3592   | 1560.70715 | 781.36084  | 2  | 17      | 13.4826 | 14.84 |
| 16 | 34.39 | 36.39 | 70.4 HAVCR2_FlexIII  | 99.0 TDERDVNYWTSR                     | Label:13C(6)15N(4)(R) @4; Label:13C(6)15N(4)(R) @12                                                              | misses R-D @4       | -0.00334778 | 1560       |            |            |            |    |         |         |       |

|    |       |       |                     |                                  |                                                                                                                  |                              |             |            |            |            |            |    |         |         |      |
|----|-------|-------|---------------------|----------------------------------|------------------------------------------------------------------------------------------------------------------|------------------------------|-------------|------------|------------|------------|------------|----|---------|---------|------|
| 17 | 34.24 | 36.26 | 47.8 SFRP4_FlexIII  | 99.0 GVCISPEAIVTDLPEDVK          | Propionamide(C)@3; Label:13C(6)15N(2)(K)@18                                                                      | -0.00241344                  | 1963.00391  | 982.5092   | 1963.00635 | 982.510437 | 2          | 20 | 17.3115 | 3.71    |      |
| 17 | 34.24 | 36.26 | 47.8 SFRP4_FlexIII  | 99.0 KVKPTLATYLSK                | Label:13C(6)15N(2)(K)@1; Label:13C(6)15N(2)(K)@3; Label:13C(6)15N(2)(K)@12                                       | missed K-V@1                 | -0.00711781 | 1371.84815 | 458.29     | 1371.85523 | 458.292328 | 3  | 16      | 18.0844 | 3.71 |
| 17 | 34.24 | 36.26 | 47.8 SFRP4_FlexIII  | 99.0 MMLLENCLVEK                 | Propionamide(C)@7; Label:13C(6)15N(2)(K)@11                                                                      |                              | -0.00021035 | 1400.69544 | 701.355    | 1400.69568 | 701.355164 | 2  | 13      | 16.746  | 3.71 |
| 17 | 34.24 | 36.26 | 47.8 SFRP4_FlexIII  | 99.0 MYNHSW/PESLACDELPVYDR       | Propionamide(C)@12; Label:13C(6)15N(4)(R)@20                                                                     |                              | -0.0066679  | 2505.09033 | 836.0374   | 2505.09692 | 836.039551 | 3  | 23      | 17.5472 | 3.71 |
| 17 | 34.24 | 36.26 | 47.8 SFRP4_FlexIII  | 99.0 RSIQWEER                    | Label:13C(6)15N(4)(R)@1; Label:13C(6)15N(4)(R)@8                                                                 | missed R-S@1                 | 0.00215036  | 1122.57068 | 562.2926   | 1122.56848 | 562.291504 | 2  | 12      | 12.4552 | 3.71 |
| 17 | 34.24 | 36.26 | 47.8 SFRP4_FlexIII  | 99.0 RYVPTFLYK                   | Label:13C(6)15N(4)(R)@1; Label:13C(6)15N(2)(K)@9                                                                 | missed R-V@1                 | 0.00017995  | 1203.67725 | 602.8459   | 1203.67712 | 602.845825 | 2  | 12      | 14.517  | 3.71 |
| 17 | 34.24 | 36.26 | 47.8 SFRP4_FlexIII  | 99.0 SGCNEVTTVVDDVK              | Propionamide(C)@3; Label:13C(6)15N(2)(K)@13                                                                      |                              | -0.0198864  | 1428.6991  | 715.3568   | 1428.70105 | 715.357788 | 2  | 16      | 13.5726 | 3.71 |
| 17 | 34.24 | 36.26 | 47.8 SFRP4_FlexIII  | 99.0 SGCNEVTTVVDDVKEIF           | Propionamide(C)@3; Label:13C(6)15N(2)(K)@13; Label:13C(6)15N(2)(K)@17                                            | missed K-E@13                | -0.00791041 | 1953.99731 | 652.3397   | 1954.00525 | 652.342346 | 3  | 15      | 17.1923 | 3.71 |
| 17 | 34.24 | 36.26 | 47.8 SFRP4_FlexIII  | 99.0 GKPPAPKPASPKK               | Label:13C(6)15N(2)(K)@2; Label:13C(6)15N(2)(K)@7; Label:13C(6)15N(2)(K)@12; Label:13C(6)15N(2)(K)@13             | missed K-K@12                | 0.0126592   | 1333.85132 | 334.4701   | 1333.83875 | 334.46695  | 4  | 11      | 7.176   | 3.71 |
| 17 | 34.24 | 36.26 | 47.8 SFRP4_FlexIII  | 99.0 VKPTLATYLSK                 | Label:13C(6)15N(2)(K)@2; Label:13C(6)15N(2)(K)@11                                                                |                              | -0.00061179 | 1235.74536 | 412.9224   | 1235.74597 | 412.922607 | 3  | 11      | 16.9494 | 3.71 |
| 17 | 34.24 | 36.26 | 47.8 SFRP4_FlexIII  | 99.0 WDITPDDMMQERPLDVDC          | Label:13C(6)15N(4)(R)@13; Propionamide(C)@19; Label:13C(6)15N(2)(K)@20                                           |                              | 0.0096057   | 2492.19629 | 831.7394   | 2492.18677 | 831.736206 | 3  | 12      | 18.0549 | 3.71 |
| 17 | 34.24 | 36.26 | 47.8 SFRP4_FlexIII  | 99.0 GKPPAPKPASPK                | Label:13C(6)15N(2)(K)@2; Label:13C(6)15N(2)(K)@7; Label:13C(6)15N(2)(K)@12                                       |                              | -0.0130814  | 1197.72815 | 400.25     | 1197.72961 | 400.250458 | 3  | 11      | 7.6725  | 3.71 |
| 17 | 34.24 | 36.26 | 47.8 SFRP4_FlexIII  | 99.0 GKPPAPKPASPK                | Label:13C(6)15N(2)(K)@2; Label:13C(6)15N(2)(K)@7; Label:13C(6)15N(2)(K)@12                                       |                              | 0.00201441  | 1197.73169 | 300.4402   | 1197.72961 | 300.439667 | 4  | 10      | 7.6914  | 3.71 |
| 17 | 34.24 | 36.26 | 47.8 SFRP4_FlexIII  | 99.0 GVCISPEAIVTDLPEDVK          | Propionamide(C)@3; Label:13C(6)15N(2)(K)@18                                                                      |                              | -0.00082653 | 1963.00549 | 982.51     | 1963.00635 | 982.510437 | 2  | 22      | 17.0477 | 3.71 |
| 17 | 34.24 | 36.26 | 47.8 SFRP4_FlexIII  | 99.0 GVCISPEAIVTDLPEDVK          | Propionamide(C)@3; Label:13C(6)15N(2)(K)@18                                                                      |                              | -0.00241344 | 1963.00391 | 982.5092   | 1963.00635 | 982.510437 | 2  | 17      | 17.5824 | 3.71 |
| 17 | 34.24 | 36.26 | 47.8 SFRP4_FlexIII  | 99.0 GVCISPEAIVTDLPEDVK          | Propionamide(C)@3; Label:13C(6)15N(2)(K)@18                                                                      |                              | -0.00903961 | 1962.99731 | 655.3397   | 1963.00635 | 655.342712 | 3  | 16      | 17.1279 | 3.71 |
| 17 | 34.24 | 36.26 | 47.8 SFRP4_FlexIII  | 99.0 KVKPTLATYLSK                | Label:13C(6)15N(2)(K)@1; Label:13C(6)15N(2)(K)@3; Label:13C(6)15N(2)(K)@12                                       | missed K-V@1                 | -0.0104709  | 1371.84473 | 686.9296   | 1371.85523 | 686.934876 | 2  | 15      | 18.1329 | 3.71 |
| 17 | 34.24 | 36.26 | 47.8 SFRP4_FlexIII  | 99.0 MMLLENCLVEK                 | Propionamide(C)@7; Label:13C(6)15N(2)(K)@11                                                                      |                              | -0.00021035 | 1400.69544 | 701.355    | 1400.69568 | 701.355164 | 2  | 12      | 16.3438 | 3.71 |
| 17 | 34.24 | 36.26 | 47.8 SFRP4_FlexIII  | 99.0 MYNHSW/PESLACDELPVYDR       | Deamidated(N)@3; Propionamide(C)@12; Label:13C(6)15N(4)(R)@20                                                    |                              | 0.022411    | 2506.10327 | 1254.059   | 2506.08081 | 1254.04773 | 2  | 18      | 17.6378 | 3.71 |
| 17 | 34.24 | 36.26 | 47.8 SFRP4_FlexIII  | 99.0 MYNHSW/PESLACDELPVYDR       | Propionamide(C)@12; Label:13C(6)15N(4)(R)@20                                                                     |                              | -0.00282269 | 2505.09399 | 836.0386   | 2505.09692 | 836.039551 | 3  | 24      | 17.8071 | 3.71 |
| 17 | 34.24 | 36.26 | 47.8 SFRP4_FlexIII  | 99.0 MYNHSW/PESLACDELPVYDR       | Oxidation(M)@1; Propionamide(C)@12; Label:13C(6)15N(4)(R)@20                                                     |                              | 0.0547307   | 2521.14673 | 841.3895   | 2521.0918  | 841.371216 | 3  | 12      | 17.4738 | 3.71 |
| 17 | 34.24 | 36.26 | 47.8 SFRP4_FlexIII  | 99.0 RYVPTFLYK                   | Label:13C(6)15N(4)(R)@1; Label:13C(6)15N(2)(K)@9                                                                 | missed R-V@1                 | -0.00771702 | 1203.66943 | 402.2304   | 1203.67712 | 402.232971 | 3  | 10      | 15.0035 | 3.71 |
| 17 | 34.24 | 36.26 | 47.8 SFRP4_FlexIII  | 99.0 SGCNEVTTVVDDVK              | Propionamide(C)@3; Label:13C(6)15N(2)(K)@13                                                                      |                              | -0.00076794 | 1428.70032 | 715.3574   | 1428.70105 | 715.357788 | 2  | 15      | 13.8341 | 3.71 |
| 17 | 34.24 | 36.26 | 47.8 SFRP4_FlexIII  | 99.0 SGCNEVTTVVDDVK              | Propionamide(C)@3; Label:13C(6)15N(2)(K)@13                                                                      |                              | -0.00404173 | 1428.70044 | 715.3575   | 1428.70105 | 715.357788 | 2  | 15      | 14.1095 | 3.71 |
| 17 | 34.24 | 36.26 | 47.8 SFRP4_FlexIII  | 99.0 SGCNEVTTVVDDVKEIF           | Propionamide(C)@3; Deamidated(N)@4; Label:13C(6)15N(2)(K)@13; Label:13C(6)15N(2)(K)@17                           | missed K-E@13                | 0.0146988   | 1955.00391 | 978.5092   | 1954.98926 | 978.501892 | 2  | 15      | 17.3394 | 3.71 |
| 17 | 34.24 | 36.26 | 47.8 SFRP4_FlexIII  | 99.0 SGCNEVTTVVDDVKEIF           | Propionamide(C)@3; Label:13C(6)15N(2)(K)@13; Label:13C(6)15N(2)(K)@17                                            | missed K-E@13                | -0.00791041 | 1953.99731 | 652.3397   | 1954.00525 | 652.342346 | 3  | 14      | 17.4648 | 3.71 |
| 17 | 34.24 | 36.26 | 47.8 SFRP4_FlexIII  | 99.0 YPTFLYK                     | Label:13C(6)15N(2)(K)@7                                                                                          | cleaved V-Y@N-term           | 0.00057017  | 938.499878 | 470.2572   | 938.499329 | 470.256928 | 2  | 9       | 15.0367 | 3.71 |
| 17 | 34.24 | 36.26 | 47.8 SFRP4_FlexIII  | 99.0 YPTFLYK                     | Label:13C(6)15N(2)(K)@7                                                                                          | cleaved V-Y@N-term           | 0.00819955  | 938.507446 | 470.261    | 938.499329 | 470.256928 | 2  | 9       | 14.7754 | 3.71 |
| 17 | 34.24 | 36.26 | 47.8 SFRP4_FlexIII  | 99.0 YPTFLYK                     | Label:13C(6)15N(2)(K)@7                                                                                          | cleaved V-Y@N-term           | 0.00073716  | 938.500061 | 470.2573   | 938.499329 | 470.256928 | 2  | 9       | 15.0782 | 3.71 |
| 17 | 34.24 | 36.26 | 47.8 SFRP4_FlexIII  | 99.0 YPTFLYK                     | Label:13C(6)15N(2)(K)@7                                                                                          | cleaved V-Y@N-term           | 0.00092027  | 938.500244 | 470.2574   | 938.499329 | 470.256928 | 2  | 9       | 14.8156 | 3.71 |
| 19 | 31.92 | 34.17 | 40.7 IL1RAP_FlexIII | 99.0 CDDWGLDTRM                  | Propionamide(C)@1; Label:13C(6)15N(4)(R)@10                                                                      |                              | -0.0009172  | 1291.51904 | 646.7668   | 1291.52002 | 646.767334 | 2  | 13      | 15.0849 | 8.71 |
| 19 | 31.92 | 34.17 | 40.7 IL1RAP_FlexIII | 99.0 DSCFNSPMKLPVHK              | Propionamide(C)@3; Label:13C(6)15N(2)(K)@9; Label:13C(6)15N(2)(K)@14                                             | missed K-L@9                 | -0.0028357  | 1688.83215 | 423.2153   | 1688.83496 | 423.216003 | 4  | 13      | 16.0004 | 8.71 |
| 19 | 31.92 | 34.17 | 40.7 IL1RAP_FlexIII | 99.0 DVLVFRPTLLNDGNYTCMLR        | Label:13C(6)15N(4)(R)@6; Propionamide(C)@18; Label:13C(6)15N(4)(R)@21                                            |                              | -0.00299324 | 2618.28589 | 873.7692   | 2618.28882 | 873.770203 | 3  | 23      | 17.8415 | 8.71 |
| 19 | 31.92 | 34.17 | 40.7 IL1RAP_FlexIII | 99.0 LYIEYGIR                    | Label:13C(6)15N(4)(R)@9                                                                                          |                              | -0.00097537 | 1163.62048 | 582.8175   | 1163.62146 | 582.817993 | 2  | 13      | 15.1202 | 8.71 |
| 19 | 31.92 | 34.17 | 40.7 IL1RAP_FlexIII | 99.0 TEDETROIILSIK               | Label:13C(6)15N(4)(R)@6; Label:13C(6)15N(2)(K)@13                                                                | missed R-T@6                 | 0.00244814  | 1550.82971 | 776.4221   | 1550.82703 | 776.420837 | 2  | 13      | 13.589  | 8.71 |
| 19 | 31.92 | 34.17 | 40.7 IL1RAP_FlexIII | 99.0 VAFPLEVVQK                  | Label:13C(6)15N(2)(K)@10                                                                                         |                              | -0.00024699 | 1136.66821 | 569.3414   | 1136.66846 | 569.341553 | 2  | 13      | 15.999  | 8.71 |
| 19 | 31.92 | 34.17 | 40.7 IL1RAP_FlexIII | 99.0 RSYVCHAR                    | Label:13C(6)15N(4)(R)@1; Propionamide(C)@5; Label:13C(6)15N(4)(R)@8                                              | missed R-S@1                 | 0.00168473  | 1081.53735 | 361.5197   | 1081.5354  | 361.519074 | 3  | 8       | 8.1274  | 8.71 |
| 19 | 31.92 | 34.17 | 40.7 IL1RAP_FlexIII | 99.0 EKDVLVFRPTLLNDGNYTCMLR      | Label:13C(6)15N(2)(K)@2; Label:13C(6)15N(4)(R)@8; Deamidated(N)@13; Propionamide(C)@20; Label:13C(6)15N(4)(R)@23 | missed K-D@2                 | 0.0262845   | 2884.45093 | 962.4909   | 2884.42456 | 962.482117 | 3  | 14      | 17.8624 | 8.71 |
| 19 | 31.92 | 34.17 | 40.7 IL1RAP_FlexIII | 99.0 VAFPLEVVQKDSCFNSPMKLPVHK    | Label:13C(6)15N(2)(K)@10; Propionamide(C)@13; Label:13C(6)15N(2)(K)@19; Label:13C(6)15N(2)(K)@24                 | missed K-D@10; missed K-L@19 | 0.021193    | 2807.51392 | 562.5101   | 2807.49292 | 562.505859 | 5  | 12      | 17.945  | 8.71 |
| 19 | 31.92 | 34.17 | 40.7 IL1RAP_FlexIII | 99.0 ITCPNVDGYFFSPSKVPTITWYMGCKY | Propionamide(C)@3; Deamidated(N)@5; Label:13C(6)15N(2)(K)@15; Propionamide(C)@24; Label:13C(6)15N(2)(K)@26       |                              | 0.00446599  | 3128.47144 | 1043.831   | 3128.4668  | 1043.82959 | 3  | 13      | 17.3524 | 8.71 |
| 19 | 31.92 | 34.17 | 40.7 IL1RAP_FlexIII | 99.0 CDDWGLDTRM                  | Propionamide(C)@1; Label:13C(6)15N(4)(R)@10                                                                      |                              | -0.00067306 | 1291.51953 | 646.767    | 1291.52002 | 646.767334 | 2  | 12      | 15.3477 | 8.71 |
| 19 | 31.92 | 34.17 | 40.7 IL1RAP_FlexIII | 99.0 CDDWGLDTRM                  | Propionamide(C)@1; Label:13C(6)15N(4)(R)@10                                                                      |                              | 0.00591875  | 1291.52612 | 646.7703   | 1291.52002 | 646.767334 | 2  | 12      | 15.6204 | 8.71 |
| 19 | 31.92 | 34.17 | 40.7 IL1RAP_FlexIII | 99.0 DSCFNSPMKLPVHK              | Propionamide(C)@3; Label:13C(6)15N(2)(K)@9; Label:13C(6)15N(2)(K)@14                                             | missed K-L@9                 | -0.00173706 | 1688.83337 | 423.2156   | 1688.83496 | 423.216003 | 4  | 12      | 13.658  | 8.71 |
| 19 | 31.92 | 34.17 | 40.7 IL1RAP_FlexIII | 99.0 DSCFNSPMKLPVHK              | Propionamide(C)@3; Label:13C(6)15N(2)(K)@9; Label:13C(6)15N(2)(K)@14                                             | missed K-L@9                 | -0.00043948 | 1688.83447 | 563.9521   | 1688.83496 | 563.952271 | 3  | 12      | 16.2143 | 8.71 |
| 19 | 31.92 | 34.17 | 40.7 IL1RAP_FlexIII | 99.0 DSCFNSPMKLPVHK              | Propionamide(C)@3; Label:13C(6)15N(2)(K)@9; Label:13C(6)15N(2)(K)@14                                             | missed K-L@9                 | -0.00648198 | 1688.82837 | 563.9501   | 1688.83496 | 563.952271 | 3  | 12      | 16.4841 | 8.71 |
| 19 | 31.92 | 34.17 | 40.7 IL1RAP_FlexIII | 99.0 LYIEYGIQR                   | Label:13C(6)15N(4)(R)@9                                                                                          |                              | 0.00427366  | 1163.62573 | 582.8201   | 1163.62146 | 582.817993 | 2  | 13      | 15.3936 | 8.71 |
| 19 | 31.92 | 34.17 | 40.7 IL1RAP_FlexIII | 99.0 LYIEYGIQR                   | Label:13C(6)15N(4)(R)@9                                                                                          |                              | -0.00073123 | 1163.62073 | 582.8176   | 1163.62146 | 582.817993 | 2  | 12      | 14.5715 | 8.71 |
| 19 | 31.92 | 34.17 | 40.7 IL1RAP_FlexIII | 99.0 LYIEYGIQR                   | Label:13C(6)15N(4)(R)@9                                                                                          |                              | -0.00097537 | 1163.62048 | 582.8175   | 1163.62146 | 582.817993 | 2  | 11      | 14.8478 | 8.71 |
| 19 | 31.92 | 34.17 | 40.7 IL1RAP_FlexIII | 99.0 VAFPLEVVQK                  | Label:13C(6)15N(2)(K)@10                                                                                         |                              | -0.00183391 | 1136.66663 | 569.3406   | 1136.66846 | 569.341553 | 2  | 13      | 15.4672 | 8.71 |
| 19 | 31.92 | 34.17 | 40.7 IL1RAP_FlexIII | 99.0 VAFPLEVVQK                  | Label:13C(6)15N(2)(K)@10                                                                                         |                              | -0.0006132  | 1136.66785 | 569.3412   | 1136.66846 | 569.341553 | 2  | 12      | 15.7244 | 8.71 |
| 19 | 31.92 | 34.17 | 40.7 IL1RAP_FlexIII | 99.0 VAFPLEVVQK                  | Label:13C(6)15N(2)(K)@10                                                                                         |                              | -0.00281047 | 1136.66565 | 569.3401   | 1136.66846 | 569.341553 | 2  | 11      | 24.3276 | 8.71 |
| 19 | 31.92 | 34.17 | 40.7 IL1RAP_FlexIII | 99.0 VAFPLEVVQK                  | Label:13C(6)15N(2)(K)@10                                                                                         |                              | -0.00040113 | 1136.66809 | 569.3413   | 1136.66846 | 569.341553 | 2  | 12      | 16.2651 | 8.71 |
| 19 | 31.92 | 34.17 | 40.7 IL1RAP_FlexIII | 99.0 VAFPLEVVQK                  | Label:13C(6)15N(2)(K)@10                                                                                         |                              | -0.00281047 | 1136.66565 | 569.3401   | 1136.66846 | 569.341553 | 2  | 12      | 16.5213 | 8.71 |
| 19 | 31.92 | 34.17 | 40.7 IL1RAP_FlexIII | 99.0 VAFPLEVVQK                  | Label:13C(6)15N(2)(K)@10                                                                                         |                              | -0.00110148 | 1136.66748 | 569.341    | 1136.66846 | 569.341553 | 2  | 11      | 15.5713 | 8.71 |
| 19 | 31.92 | 34.17 | 40.7 IL1RAP_FlexIII | 99.0 YPTFLYK                     | Label:13C(6)15N(2)(K)@7                                                                                          | cleaved Q-Y@N-term           | 0.00057017  | 938.499878 | 470.2572   | 938.499329 | 470.256928 | 2  | 9       | 15.0367 | 8.71 |
| 19 | 31.92 | 34.17 | 40.7 IL1RAP_FlexIII | 99.0 YPTFLYK                     | Label:13C(6)15N(2)(K)@7                                                                                          | cleaved Q-Y@N-term           | 0.00819955  | 938.507446 | 470.261    | 938.499329 | 470.256928 | 2  | 9       | 14.7754 | 8.71 |
| 19 | 31.92 | 34.17 | 40.7 IL1RAP_FlexIII | 99.0 YPTFLYK                     | Label:13C(6)15N(2)(K)@7                                                                                          | cleaved Q-Y@N-term           | 0.00073716  | 938.500061 | 470.2573   | 938.499329 | 470.256928 | 2  | 9       | 15.0782 | 8.7  |

|    |       |       |                    |                                        |                                                                                                              |             |            |          |            |            |   |    |         |       |
|----|-------|-------|--------------------|----------------------------------------|--------------------------------------------------------------------------------------------------------------|-------------|------------|----------|------------|------------|---|----|---------|-------|
| 22 | 28.89 | 30.92 | 54.1_LYVE1_FlexII  | 99.0_LICVTEVFMETSTMSTETEPFVENK         | Propionamide(C)@3; Label:13C(6)15N(2)(K)@25                                                                  | -0.00263705 | 2943.36523 | 1472.69  | 2943.36841 | 1472.69141 | 2 | 21 | 17.6452 | 16.47 |
| 22 | 28.89 | 30.92 | 54.1_LYVE1_FlexII  | 99.0_LLGLSLAGK                         | Label:13C(6)15N(2)(K)@9                                                                                      | -0.00244525 | 878.565674 | 440.2901 | 878.568054 | 440.29129  | 2 | 12 | 15.6322 | 16.47 |
| 22 | 28.89 | 30.92 | 54.1_LYVE1_FlexII  | 99.0_LLGLSLAGKDQVETALK                 | Label:13C(6)15N(2)(K)@9; Label:13C(6)15N(2)(K)@17                                                            | -0.0147141  | 1771.02795 | 591.3499 | 1771.0426  | 591.354797 | 3 | 16 | 15.4928 | 16.47 |
| 22 | 28.89 | 30.92 | 54.1_LYVE1_FlexII  | 99.0_NGVGVLR                           | Label:13C(6)15N(4)(R)@8                                                                                      | -0.00552338 | 836.505249 | 419.2599 | 836.510742 | 419.262665 | 2 | 10 | 13.9357 | 16.47 |
| 22 | 28.89 | 30.92 | 54.1_LYVE1_FlexII  | 99.0_ASFETCSYGVWGDGFVVISR              | Propionamide(C)@9; Label:13C(6)15N(4)(R)@20                                                                  | -0.00416971 | 2260.04541 | 1131.03  | 2260.04981 | 1131.03223 | 2 | 18 | 17.237  | 16.47 |
| 22 | 28.89 | 30.92 | 54.1_LYVE1_FlexII  | 99.0_CGKNGVGVLR                        | Propionamide(C)@1; Label:13C(6)15N(2)(K)@3; Deamidated(N)@4; Label:13C(6)15N(4)(R)@11                        | -0.00034851 | 1204.67151 | 603.343  | 1204.67175 | 603.34314  | 2 | 17 | 13.4337 | 16.47 |
| 22 | 28.89 | 30.92 | 54.1_LYVE1_FlexII  | 99.0_CLEAEVYPTFLYK                     | Propionamide(C)@1; Label:13C(6)15N(2)(K)@13                                                                  | -0.0169642  | 1653.81873 | 827.9166 | 1653.82044 | 827.917481 | 2 | 18 | 15.9763 | 16.47 |
| 22 | 28.89 | 30.92 | 54.1_LYVE1_FlexII  | 99.0_CLEAEVYPTFLYK                     | Propionamide(C)@1; Label:13C(6)15N(2)(K)@13                                                                  | -0.00120814 | 1653.81921 | 827.9169 | 1653.82044 | 827.917481 | 2 | 16 | 16.2455 | 16.47 |
| 22 | 28.89 | 30.92 | 54.1_LYVE1_FlexII  | 99.0_CLEAEVYPTFLYK                     | Propionamide(C)@1; Label:13C(6)15N(2)(K)@13                                                                  | -0.00157435 | 1653.81885 | 827.9167 | 1653.82044 | 827.917481 | 2 | 14 | 16.7786 | 16.47 |
| 22 | 28.89 | 30.92 | 54.1_LYVE1_FlexII  | 99.0_CLEAEVYPTFLYK                     | Propionamide(C)@1; Label:13C(6)15N(2)(K)@13                                                                  | 0.00501745  | 1653.82544 | 827.92   | 1653.82044 | 827.917481 | 2 | 14 | 17.0509 | 16.47 |
| 22 | 28.89 | 30.92 | 54.1_LYVE1_FlexII  | 99.0_CLEAEVYPTFLYK                     | Propionamide(C)@1; Label:13C(6)15N(2)(K)@13                                                                  | 0.00050084  | 1653.82092 | 827.9177 | 1653.82044 | 827.917481 | 2 | 14 | 18.4119 | 16.47 |
| 22 | 28.89 | 30.92 | 54.1_LYVE1_FlexII  | 99.0_CLEAEVYPTFLYK                     | Propionamide(C)@1; Label:13C(6)15N(2)(K)@13                                                                  | 0.00501745  | 1653.82544 | 827.92   | 1653.82044 | 827.917481 | 2 | 12 | 18.6814 | 16.47 |
| 22 | 28.89 | 30.92 | 54.1_LYVE1_FlexII  | 99.0_CLEAEVYPTFLYK                     | Propionamide(C)@1; Label:13C(6)15N(2)(K)@13                                                                  | 0.00501745  | 1653.82544 | 827.92   | 1653.82044 | 827.917481 | 2 | 12 | 19.1403 | 16.47 |
| 22 | 28.89 | 30.92 | 54.1_LYVE1_FlexII  | 99.0_CLEAEVYPTFLYK                     | Propionamide(C)@1; Label:13C(6)15N(2)(K)@13                                                                  | 0.00501745  | 1653.82544 | 827.92   | 1653.82044 | 827.917481 | 2 | 13 | 24.3623 | 16.47 |
| 22 | 28.89 | 30.92 | 54.1_LYVE1_FlexII  | 99.0_CLEAEVYPTFLYK                     | Propionamide(C)@1; Label:13C(6)15N(2)(K)@13                                                                  | 0.00501745  | 1653.82544 | 827.92   | 1653.82044 | 827.917481 | 2 | 13 | 17.8962 | 16.47 |
| 22 | 28.89 | 30.92 | 54.1_LYVE1_FlexII  | 99.0_CLEAEVYPTFLYK                     | Propionamide(C)@1; Label:13C(6)15N(2)(K)@13                                                                  | 0.00501745  | 1653.82544 | 827.92   | 1653.82044 | 827.917481 | 2 | 13 | 18.1584 | 16.47 |
| 22 | 28.89 | 30.92 | 54.1_LYVE1_FlexII  | 99.0_CLEAEVYPTFLYK                     | Propionamide(C)@1; Label:13C(6)15N(2)(K)@13                                                                  | -0.00236653 | 1653.81824 | 552.28   | 1653.82044 | 552.280762 | 3 | 11 | 16.2719 | 16.47 |
| 22 | 28.89 | 30.92 | 54.1_LYVE1_FlexII  | 99.0_IMGITLVSK                         | Label:13C(6)15N(2)(K)@9                                                                                      | -0.00274577 | 968.579285 | 485.2969 | 968.58197  | 485.298279 | 2 | 10 | 15.1115 | 16.47 |
| 22 | 28.89 | 30.92 | 54.1_LYVE1_FlexII  | 99.0_IMGITLVSK                         | Label:13C(6)15N(2)(K)@9; Label:13C(6)15N(2)(K)@10                                                            | -0.00029896 | 1104.69092 | 553.3527 | 1104.69116 | 553.352844 | 2 | 11 | 14.22   | 16.47 |
| 22 | 28.89 | 30.92 | 54.1_LYVE1_FlexII  | 99.0_KANQQLNTEAK                       | Label:13C(6)15N(2)(K)@1; Label:13C(6)15N(2)(K)@12                                                            | -0.00053894 | 1406.74841 | 469.9234 | 1406.7489  | 469.923554 | 3 | 13 | 12.5527 | 16.47 |
| 22 | 28.89 | 30.92 | 54.1_LYVE1_FlexII  | 99.0_LICVTEVFMETSTMSTETEPFVENK         | Propionamide(C)@3; Label:13C(6)15N(2)(K)@25                                                                  | -1.13E-05   | 2943.36865 | 982.1301 | 2943.36841 | 982.130066 | 3 | 22 | 17.1833 | 16.47 |
| 22 | 28.89 | 30.92 | 54.1_LYVE1_FlexII  | 99.0_LICVTEVFMETSTMSTETEPFVENK         | Propionamide(C)@3; Label:13C(6)15N(2)(K)@25                                                                  | -1.13E-05   | 2943.36865 | 982.1301 | 2943.36841 | 982.130066 | 3 | 22 | 17.988  | 16.47 |
| 22 | 28.89 | 30.92 | 54.1_LYVE1_FlexII  | 99.0_LICVTEVFMETSTMSTETEPFVENK         | Propionamide(C)@3; Label:13C(6)15N(2)(K)@25                                                                  | -1.13E-05   | 2943.36865 | 982.1301 | 2943.36841 | 982.130066 | 3 | 18 | 18.2987 | 16.47 |
| 22 | 28.89 | 30.92 | 54.1_LYVE1_FlexII  | 99.0_LICVTEVFMETSTMSTETEPFVENK         | Propionamide(C)@3; Label:13C(6)15N(2)(K)@25                                                                  | 0.00198987  | 2943.37012 | 982.1307 | 2943.36841 | 982.130066 | 3 | 17 | 17.4482 | 16.47 |
| 22 | 28.89 | 30.92 | 54.1_LYVE1_FlexII  | 99.0_LICVTEVFMETSTMSTETEPFVENK         | Propionamide(C)@3; Deamidated(N)@24; Label:13C(6)15N(2)(K)@25                                                | 0.0333672   | 2944.38525 | 1473.2   | 2944.3523  | 1473.18347 | 2 | 13 | 17.4715 | 16.47 |
| 22 | 28.89 | 30.92 | 54.1_LYVE1_FlexII  | 99.0_LICVTEVFMETSTMSTETEPFVENK         | Propionamide(C)@3; Deamidated(N)@24; Label:13C(6)15N(2)(K)@25                                                | 0.0358709   | 2944.38818 | 982.47   | 2944.3523  | 982.458069 | 3 | 12 | 17.4447 | 16.47 |
| 22 | 28.89 | 30.92 | 54.1_LYVE1_FlexII  | 99.0_LICVTEVFMETSTMSTETEPFVENK         | Propionamide(C)@3; Deamidated(N)@24; Label:13C(6)15N(2)(K)@25                                                | 0.0358709   | 2944.38818 | 982.47   | 2944.3523  | 982.458069 | 3 | 12 | 17.7092 | 16.47 |
| 22 | 28.89 | 30.92 | 54.1_LYVE1_FlexII  | 99.0_LICVTEVFMETSTMSTETEPFVENK         | Propionamide(C)@3; Deamidated(N)@24; Label:13C(6)15N(2)(K)@25                                                | 0.0133476   | 2944.36523 | 1473.19  | 2944.3523  | 1473.18347 | 2 | 11 | 17.1947 | 16.47 |
| 22 | 28.89 | 30.92 | 54.1_LYVE1_FlexII  | 99.0_LLGLSLAGK                         | Label:13C(6)15N(2)(K)@9                                                                                      | -0.00104145 | 878.567078 | 440.2908 | 878.568054 | 440.29129  | 2 | 12 | 15.362  | 16.47 |
| 22 | 28.89 | 30.92 | 54.1_LYVE1_FlexII  | 99.0_LLGLSLAGKDQVETALK                 | Label:13C(6)15N(2)(K)@9; Label:13C(6)15N(2)(K)@17                                                            | 0.0153152   | 1771.05798 | 591.3599 | 1771.0426  | 591.354797 | 3 | 15 | 15.24   | 16.47 |
| 22 | 28.89 | 30.92 | 54.1_LYVE1_FlexII  | 99.0_LLGLSLAGKDQVETALK                 | Label:13C(6)15N(2)(K)@9; Label:13C(6)15N(2)(K)@17                                                            | -0.00098248 | 1771.04163 | 886.5281 | 1771.0426  | 886.528565 | 2 | 25 | 15.2725 | 16.47 |
| 22 | 28.89 | 30.92 | 54.1_LYVE1_FlexII  | 99.0_LLGLSLAGKDQVETALK                 | Label:13C(6)15N(2)(K)@9; Label:13C(6)15N(2)(K)@17                                                            | 0.00292377  | 1771.04553 | 886.53   | 1771.0426  | 886.528565 | 2 | 18 | 15.5361 | 16.47 |
| 22 | 28.89 | 30.92 | 54.1_LYVE1_FlexII  | 99.0_LLGLSLAGKDQVETALK                 | Label:13C(6)15N(2)(K)@9; Label:13C(6)15N(2)(K)@17                                                            | 0.0153152   | 1771.05798 | 591.3599 | 1771.0426  | 591.354797 | 3 | 15 | 16.249  | 16.47 |
| 22 | 28.89 | 30.92 | 54.1_LYVE1_FlexII  | 99.0_LLGLSLAGKDQVETALK                 | Label:13C(6)15N(2)(K)@9; Label:13C(6)15N(2)(K)@17                                                            | 0.0153152   | 1771.05798 | 591.3599 | 1771.0426  | 591.354797 | 3 | 14 | 24.5122 | 16.47 |
| 22 | 28.89 | 30.92 | 54.1_LYVE1_FlexII  | 99.0_LLGLSLAGKDQVETALK                 | Label:13C(6)15N(2)(K)@9; Label:13C(6)15N(2)(K)@17                                                            | 0.0153152   | 1771.05798 | 591.3599 | 1771.0426  | 591.354797 | 3 | 11 | 17.3398 | 16.47 |
| 22 | 28.89 | 30.92 | 54.1_LYVE1_FlexII  | 99.0_NGVGVLR                           | Deamidated(N)@1; Label:13C(6)15N(4)(R)@8                                                                     | -0.00174572 | 837.493103 | 419.7538 | 837.494751 | 419.754669 | 2 | 10 | 14.3584 | 16.47 |
| 22 | 28.89 | 30.92 | 54.1_LYVE1_FlexII  | 99.0_NGVGVLR                           | Deamidated(N)@1; Label:13C(6)15N(4)(R)@8                                                                     | -0.00137951 | 837.493469 | 419.754  | 837.494751 | 419.754669 | 2 | 10 | 14.8797 | 16.47 |
| 22 | 28.89 | 30.92 | 54.1_LYVE1_FlexII  | 99.0_NGVGVLR                           | Deamidated(N)@1; Label:13C(6)15N(4)(R)@8                                                                     | -0.00955822 | 837.485291 | 419.7499 | 837.494751 | 419.754669 | 2 | 10 | 15.156  | 16.47 |
| 22 | 28.89 | 30.92 | 54.1_LYVE1_FlexII  | 99.0_NGVGVLR                           | Deamidated(N)@1; Label:13C(6)15N(4)(R)@8                                                                     | -0.00955822 | 837.485291 | 419.7499 | 837.494751 | 419.754669 | 2 | 10 | 15.4233 | 16.47 |
| 22 | 28.89 | 30.92 | 54.1_LYVE1_FlexII  | 99.0_NGVGVLR                           | Deamidated(N)@1; Label:13C(6)15N(4)(R)@8                                                                     | -0.00174572 | 837.493103 | 419.7538 | 837.494751 | 419.754669 | 2 | 10 | 14.6173 | 16.47 |
| 22 | 28.89 | 30.92 | 54.1_LYVE1_FlexII  | 99.0_NGVGVLR                           | Label:13C(6)15N(4)(R)@8                                                                                      | -0.00552338 | 836.505249 | 419.2599 | 836.510742 | 419.262665 | 2 | 9  | 17.725  | 16.47 |
| 22 | 28.89 | 30.92 | 54.1_LYVE1_FlexII  | 99.0_NGVGVLR                           | Label:13C(6)15N(4)(R)@8                                                                                      | -0.00094574 | 836.509888 | 419.2622 | 836.510742 | 419.262665 | 2 | 9  | 14.2117 | 16.47 |
| 22 | 28.89 | 30.92 | 54.1_LYVE1_FlexII  | 99.0_YPTFLYK                           | Label:13C(6)15N(2)(K)@7                                                                                      | 0.00057017  | 938.499878 | 470.2572 | 938.499329 | 470.256928 | 2 | 9  | 15.0367 | 16.47 |
| 22 | 28.89 | 30.92 | 54.1_LYVE1_FlexII  | 99.0_YPTFLYK                           | Label:13C(6)15N(2)(K)@7                                                                                      | 0.00819955  | 938.507446 | 470.261  | 938.499329 | 470.256928 | 2 | 9  | 14.7754 | 16.47 |
| 22 | 28.89 | 30.92 | 54.1_LYVE1_FlexII  | 99.0_YPTFLYK                           | Label:13C(6)15N(2)(K)@7                                                                                      | 0.00073716  | 938.500061 | 470.2573 | 938.499329 | 470.256928 | 2 | 9  | 15.0782 | 16.47 |
| 22 | 28.89 | 30.92 | 54.1_LYVE1_FlexII  | 99.0_YPTFLYK                           | Label:13C(6)15N(2)(K)@7                                                                                      | 0.00092027  | 938.500244 | 470.2574 | 938.499329 | 470.256928 | 2 | 9  | 14.8156 | 16.47 |
| 24 | 27.17 | 29.2  | 66.8_ICOSLG_FlexII | 99.0_ALMSPAGMLR                        | Label:13C(6)15N(2)(K)@7                                                                                      | 0.00479769  | 1045.54602 | 523.7803 | 1045.54126 | 523.777893 | 2 | 12 | 15.2081 | 29.99 |
| 24 | 27.17 | 29.2  | 66.8_ICOSLG_FlexII | 99.0_AMVGSDELSCACPEGSR                 | Propionamide(C)@11; Propionamide(C)@13; Label:13C(6)15N(4)(R)@18                                             | -0.00836721 | 1961.84363 | 981.9291 | 1961.85205 | 981.933289 | 2 | 21 | 14.1879 | 29.99 |
| 24 | 27.17 | 29.2  | 66.8_ICOSLG_FlexII | 99.0_AMVGSDELSCACPEGSRFIDLNDVYVYWTSESK | Propionamide(C)@11; Propionamide(C)@13; Label:13C(6)15N(4)(R)@18; Deamidated(N)@22; Label:13C(6)15N(2)(K)@34 | 0.0028386   | 3945.75244 | 1316.258 | 3945.75024 | 1316.25732 | 3 | 15 | 16.9164 | 29.99 |
| 24 | 27.17 | 29.2  | 66.8_ICOSLG_FlexII | 99.0_DKITTENPVSTGEK                    | Label:13C(6)15N(2)(K)@2; Label:13C(6)15N(2)(K)@13                                                            | 0.00075759  | 1432.73889 | 478.5869 | 1432.73804 | 478.586609 | 3 | 14 | 11.9798 | 29.99 |
| 24 | 27.17 | 29.2  | 66.8_ICOSLG_FlexII | 99.0_FDLNDVYVYWTSESK                   | Label:13C(6)15N(2)(K)@16                                                                                     | -0.0028433  | 2000.92212 | 667.9813 | 2000.92468 | 667.982178 | 3 | 15 | 17.4515 | 29.99 |
| 24 | 27.17 | 29.2  | 66.8_ICOSLG_FlexII | 99.0_GLYDVSVLR                         | Label:13C(6)15N(4)(R)@10                                                                                     | -0.00053642 | 1129.63672 | 565.8256 | 1129.63709 | 565.825806 | 2 | 12 | 16.5685 | 29.99 |
| 24 | 27.17 | 29.2  | 66.8_ICOSLG_FlexII | 99.0_ITENPVSTGEK                       | Label:13C(6)15N(2)(K)@11                                                                                     | 0.00371846  | 1181.60571 | 591.8101 | 1181.60193 | 591.808228 | 2 | 13 | 11.903  | 29.99 |
| 24 | 27.17 | 29.2  | 66.8_ICOSLG_FlexII | 99.0_LFNVTPODEOK                       | Label:13C(6)15N(2)(K)@11                                                                                     | -0.00118201 | 1325.66943 | 663.842  | 1325.67065 | 663.84259  | 2 | 14 | 13.8565 | 29.99 |
| 24 | 27.17 | 29.2  | 66.8_ICOSLG_FlexII | 99.0_LGSPGLLLFSSLRADTQEK               | Label:13C(6)15N(4)(R)@15; Label:13C(6)15N(2)(K)@21                                                           | 0.0121936   | 2309.28735 | 770.7697 | 2309.2749  | 770.765625 | 3 | 13 | 18.0584 | 29.99 |
| 24 | 27.17 | 29.2  | 66.8_ICOSLG_FlexII | 99.0_TDNSLLDQALONDTVFLNMR              | Label:13C(6)15N(4)(R)@10                                                                                     | -0.00460292 | 2307.11206 | 770.0446 | 2307.11646 | 770.046143 | 3 | 16 | 17.7775 | 29.99 |
| 24 | 27.17 | 29.2  | 66.8_ICOSLG_FlexII | 99.0_TPSVINGGCCIEVLLQNLTVGSQTGNDIGER   | Propionamide(C)@8; Propionamide(C)@9; Label:13C(6)15N(4)(R)@32                                               | -0.007997   | 3523.71803 | 1175.58  | 3523.72754 | 1175.58313 | 3 | 25 | 17.5585 | 29.99 |
| 24 | 27.17 | 29.2  | 66.8_ICOSLG_FlexII | 99.0_TPSVINGGCCIEVLLQNLTVGSQTGNDIGERDK | Propionamide(C)@8; Propionamide(C)@9; Label:13C(6)15N(4)(R)@32; Label:13C(6)15N(2)(K)@34                     | 0.00216467  | 3774.86572 | 944.7237 | 3774.86353 | 944.723145 | 4 | 18 | 17.5074 | 29.99 |
| 24 | 27.17 | 29.2  | 66.8_ICOSLG_FlexII | 99.0_TVVTYHIPONSSLENVDSR               | Label:13C(6)15N(4)(R)@10                                                                                     | -0.0079895  | 2158.05713 | 720.3597 | 2158.06543 | 720.362427 | 3 | 17 | 14.0415 | 29.99 |
| 24 | 27.17 | 29.2  | 66.8_ICOSLG_FlexII | 99.0_ALMSPAGMLR                        | Label:13C(6)15N(4)(R)@10                                                                                     | 4.38E-05    | 1055.54944 | 528.782  | 1055.54956 | 528.782044 | 2 | 10 | 15.3578 | 29.99 |
| 24 | 27.17 |       |                    |                                        |                                                                                                              |             |            |          |            |            |   |    |         |       |

|    |       |      |      |                |      |                                      |                                                                                                                        |             |            |          |            |            |   |    |         |       |
|----|-------|------|------|----------------|------|--------------------------------------|------------------------------------------------------------------------------------------------------------------------|-------------|------------|----------|------------|------------|---|----|---------|-------|
| 24 | 27.17 | 29.2 | 66.8 | ICOSLG_FlexIII | 99.0 | FDLNDVVYVWQTSESK                     | Label: 13C(6)15N(2)(K) @ 16                                                                                            | -8.14E-05   | 2000.92542 | 1001.47  | 2000.92468 | 1001.46967 | 2 | 19 | 17.122  | 29.99 |
| 24 | 27.17 | 29.2 | 66.8 | ICOSLG_FlexIII | 99.0 | FDLNDVVYVWQTSESK                     | Label: 13C(6)15N(2)(K) @ 16                                                                                            | -0.00137846 | 2000.92358 | 667.9818 | 2000.92468 | 667.982178 | 3 | 15 | 17.1887 | 29.99 |
| 24 | 27.17 | 29.2 | 66.8 | ICOSLG_FlexIII | 99.0 | FDLNDVVYVWQTSESK                     | Label: 13C(6)15N(2)(K) @ 16                                                                                            | 0.00126135  | 2000.92542 | 1001.47  | 2000.92468 | 1001.46967 | 2 | 18 | 17.401  | 29.99 |
| 24 | 27.17 | 29.2 | 66.8 | ICOSLG_FlexIII | 99.0 | GLYDVVSVLR                           | Label: 13C(6)15N(4)(R) @ 10                                                                                            | -0.00090263 | 1129.63623 | 565.8254 | 1129.63709 | 565.825806 | 2 | 12 | 16.3055 | 29.99 |
| 24 | 27.17 | 29.2 | 66.8 | ICOSLG_FlexIII | 99.0 | GLYDVVSVLR                           | Label: 13C(6)15N(4)(R) @ 10                                                                                            | 0.00092842  | 1129.63806 | 565.8263 | 1129.63709 | 565.825806 | 2 | 12 | 16.8303 | 29.99 |
| 24 | 27.17 | 29.2 | 66.8 | ICOSLG_FlexIII | 99.0 | GLYDVVSVLR                           | Label: 13C(6)15N(4)(R) @ 10                                                                                            | -0.00298463 | 1119.62585 | 560.8202 | 1119.62878 | 560.821655 | 2 | 12 | 16.3093 | 29.99 |
| 24 | 27.17 | 29.2 | 66.8 | ICOSLG_FlexIII | 99.0 | GLYDVVSVLR                           | Label: 13C(6)15N(4)(R) @ 10                                                                                            | 0.00056221  | 1129.6377  | 565.8261 | 1129.63709 | 565.825806 | 2 | 12 | 17.102  | 29.99 |
| 24 | 27.17 | 29.2 | 66.8 | ICOSLG_FlexIII | 99.0 | GLYDVVSVLR                           | Label: 13C(6)15N(4)(R) @ 10                                                                                            | 0.00092842  | 1129.63806 | 565.8263 | 1129.63709 | 565.825806 | 2 | 12 | 17.3729 | 29.99 |
| 24 | 27.17 | 29.2 | 66.8 | ICOSLG_FlexIII | 99.0 | GLYDVVSVLR                           | Label: 13C(6)15N(4)(R) @ 10                                                                                            | 0.0087409   | 1129.64587 | 565.8302 | 1129.63709 | 565.825806 | 2 | 7  | 26.0713 | 29.99 |
| 24 | 27.17 | 29.2 | 66.8 | ICOSLG_FlexIII | 99.0 | GLYDVVSVLR                           | Label: 13C(6)15N(4)(R) @ 10                                                                                            | -0.00090263 | 1129.63623 | 565.8254 | 1129.63709 | 565.825806 | 2 | 7  | 25.5106 | 29.99 |
| 24 | 27.17 | 29.2 | 66.8 | ICOSLG_FlexIII | 99.0 | GLYDVVSVLR                           | Label: 13C(6)15N(4)(R) @ 10                                                                                            | 0.0087409   | 1129.64587 | 565.8302 | 1129.63709 | 565.825806 | 2 | 9  | 18.6975 | 29.99 |
| 24 | 27.17 | 29.2 | 66.8 | ICOSLG_FlexIII | 99.0 | GLYDVVSVLR                           | Label: 13C(6)15N(4)(R) @ 10                                                                                            | -0.00298463 | 1119.62585 | 560.8202 | 1119.62878 | 560.821655 | 2 | 10 | 16.6475 | 29.99 |
| 24 | 27.17 | 29.2 | 66.8 | ICOSLG_FlexIII | 99.0 | GLYDVVSVLR                           | Label: 13C(6)15N(4)(R) @ 10                                                                                            | 0.00251533  | 1129.63965 | 565.8271 | 1129.63709 | 565.825806 | 2 | 9  | 18.1882 | 29.99 |
| 24 | 27.17 | 29.2 | 66.8 | ICOSLG_FlexIII | 99.0 | TDNSLLDQALQNDTVFLNMR                 | Deamidated(Q) @ 8; Oxidation(M) @ 19; Label: 13C(6)15N(4)(R) @ 20                                                      | 0.0189488   | 2334.12329 | 1168.069 | 2334.10376 | 1168.05908 | 2 | 19 | 16.9519 | 29.99 |
| 24 | 27.17 | 29.2 | 66.8 | ICOSLG_FlexIII | 99.0 | TDNSLLDQALQNDTVFLNMR                 | Deamidated(N) @ 12; Label: 13C(6)15N(4)(R) @ 20                                                                        | -0.0058718  | 2318.10327 | 1160.059 | 2318.10889 | 1160.06165 | 2 | 23 | 17.1062 | 29.99 |
| 24 | 27.17 | 29.2 | 66.8 | ICOSLG_FlexIII | 99.0 | TDNSLLDQALQNDTVFLNMR                 | Deamidated(N) @ 12; Label: 13C(6)15N(4)(R) @ 20                                                                        | -0.00161465 | 2318.10742 | 773.7097 | 2318.10889 | 773.710205 | 3 | 19 | 17.1085 | 29.99 |
| 24 | 27.17 | 29.2 | 66.8 | ICOSLG_FlexIII | 99.0 | TDNSLLDQALQNDTVFLNMR                 | Deamidated(N) @ 18; Label: 13C(6)15N(4)(R) @ 20                                                                        | -0.00161465 | 2318.10742 | 773.7097 | 2318.10889 | 773.710205 | 3 | 16 | 17.3752 | 29.99 |
| 24 | 27.17 | 29.2 | 66.8 | ICOSLG_FlexIII | 99.0 | TDNSLLDQALQNDTVFLNMR                 | Deamidated(Q) @ 8; Label: 13C(6)15N(4)(R) @ 20                                                                         | 0.0139035   | 2318.12329 | 1160.069 | 2318.10889 | 1160.06165 | 2 | 18 | 17.4964 | 29.99 |
| 24 | 27.17 | 29.2 | 66.8 | ICOSLG_FlexIII | 99.0 | TDNSLLDQALQNDTVFLNMR                 | Label: 13C(6)15N(4)(R) @ 20                                                                                            | -0.00764786 | 2317.11694 | 773.3796 | 2317.12476 | 773.382202 | 3 | 21 | 17.5645 | 29.99 |
| 24 | 27.17 | 29.2 | 66.8 | ICOSLG_FlexIII | 99.0 | TDNSLLDQALQNDTVFLNMR                 | Deamidated(Q) @ 8                                                                                                      | 0.0221975   | 2308.12329 | 1155.069 | 2308.10059 | 1155.0575  | 2 | 18 | 17.7156 | 29.99 |
| 24 | 27.17 | 29.2 | 66.8 | ICOSLG_FlexIII | 99.0 | TDNSLLDQALQNDTVFLNMR                 | Deamidated(Q) @ 11; Label: 13C(6)15N(4)(R) @ 20                                                                        | 0.0225399   | 2318.13135 | 580.5401 | 2318.10889 | 580.534485 | 4 | 17 | 17.7422 | 29.99 |
| 24 | 27.17 | 29.2 | 66.8 | ICOSLG_FlexIII | 99.0 | TDNSLLDQALQNDTVFLNMR                 | Label: 13C(6)15N(4)(R) @ 20                                                                                            | -0.00134596 | 2317.12329 | 1159.569 | 2317.12476 | 1159.5697  | 2 | 27 | 17.7753 | 29.99 |
| 24 | 27.17 | 29.2 | 66.8 | ICOSLG_FlexIII | 99.0 | TDNSLLDQALQNDTVFLNMR                 | Label: 13C(6)15N(4)(R) @ 20                                                                                            | 0.00260602  | 2317.12744 | 773.3831 | 2317.12476 | 773.382202 | 3 | 22 | 17.8287 | 29.99 |
| 24 | 27.17 | 29.2 | 66.8 | ICOSLG_FlexIII | 99.0 | TDNSLLDQALQNDTVFLNMR                 | Deamidated(Q) @ 11; Label: 13C(6)15N(4)(R) @ 20                                                                        | 0.0139035   | 2318.12329 | 1160.069 | 2318.10889 | 1160.06165 | 2 | 20 | 18.0471 | 29.99 |
| 24 | 27.17 | 29.2 | 66.8 | ICOSLG_FlexIII | 99.0 | TDNSLLDQALQNDTVFLNMR                 | Label: 13C(6)15N(4)(R) @ 20                                                                                            | -0.00764786 | 2317.11694 | 773.3796 | 2317.12476 | 773.382202 | 3 | 15 | 18.1023 | 29.99 |
| 24 | 27.17 | 29.2 | 66.8 | ICOSLG_FlexIII | 99.0 | TDNSLLDQALQNDTVFLNMR                 | Deamidated(Q) @ 8; Label: 13C(6)15N(4)(R) @ 20                                                                         | 0.0139035   | 2318.12329 | 1160.069 | 2318.10889 | 1160.06165 | 2 | 18 | 18.2975 | 29.99 |
| 24 | 27.17 | 29.2 | 66.8 | ICOSLG_FlexIII | 99.0 | TDNSLLDQALQNDTVFLNMR                 | Label: 13C(6)15N(4)(R) @ 20                                                                                            | -0.00764786 | 2317.11694 | 773.3796 | 2317.12476 | 773.382202 | 3 | 16 | 18.3574 | 29.99 |
| 24 | 27.17 | 29.2 | 66.8 | ICOSLG_FlexIII | 99.0 | TDNSLLDQALQNDTVFLNMR                 | Label: 13C(6)15N(4)(R) @ 20                                                                                            | -0.00764786 | 2317.11694 | 773.3796 | 2317.12476 | 773.382202 | 3 | 13 | 18.6504 | 29.99 |
| 24 | 27.17 | 29.2 | 66.8 | ICOSLG_FlexIII | 99.0 | TDNSLLDQALQNDTVFLNMR                 | Deamidated(Q) @ 8; Label: 13C(6)15N(4)(R) @ 20                                                                         | 0.0297077   | 2318.13843 | 773.7201 | 2318.10889 | 773.710205 | 3 | 12 | 17.7322 | 29.99 |
| 24 | 27.17 | 29.2 | 66.8 | ICOSLG_FlexIII | 99.0 | TDNSLLDQALQNDTVFLNMR                 | Deamidated(Q) @ 11; Oxidation(M) @ 19; Label: 13C(6)15N(4)(R) @ 20                                                     | 0.023328    | 2334.12695 | 779.0496 | 2334.10376 | 779.04187  | 3 | 14 | 16.9587 | 29.99 |
| 24 | 27.17 | 29.2 | 66.8 | ICOSLG_FlexIII | 99.0 | TPSVNIGCCIE NVLQQNLT VGSQT GNDIGER   | Propionamide(C) @ 8; Propionamide(C) @ 9; Deamidated(N) @ 12; Label: 13C(6)15N(4)(R) @ 32                              | 0.0227554   | 3524.73511 | 1175.919 | 3524.71143 | 1175.91113 | 3 | 26 | 17.2993 | 29.99 |
| 24 | 27.17 | 29.2 | 66.8 | ICOSLG_FlexIII | 99.0 | TPSVNIGCCIE NVLQQNLT VGSQT GNDIGER   | Propionamide(C) @ 8; Propionamide(C) @ 9; Deamidated(N) @ 18; Label: 13C(6)15N(4)(R) @ 32                              | 0.0169418   | 3524.72852 | 882.1894 | 3524.71143 | 882.18512  | 4 | 24 | 17.64   | 29.99 |
| 24 | 27.17 | 29.2 | 66.8 | ICOSLG_FlexIII | 99.0 | TPSVNIGCCIE NVLQQNLT VGSQT GNDIGER   | Propionamide(C) @ 8; Propionamide(C) @ 9; Deamidated(Q) @ 17; Label: 13C(6)15N(4)(R) @ 32                              | 0.0227554   | 3524.73511 | 1175.919 | 3524.71143 | 1175.91113 | 3 | 19 | 18.2294 | 29.99 |
| 24 | 27.17 | 29.2 | 66.8 | ICOSLG_FlexIII | 99.0 | TPSVNIGCCIE NVLQQNLT VGSQT GNDIGER   | Propionamide(C) @ 8; Propionamide(C) @ 9; Deamidated(Q) @ 16; Label: 13C(6)15N(4)(R) @ 32                              | 0.0227554   | 3524.73511 | 1175.919 | 3524.71143 | 1175.91113 | 3 | 18 | 24.5791 | 29.99 |
| 24 | 27.17 | 29.2 | 66.8 | ICOSLG_FlexIII | 99.0 | TPSVNIGCCIE NVLQQNLT VGSQT GNDIGER   | Propionamide(C) @ 8; Propionamide(C) @ 9; Deamidated(Q) @ 16; Label: 13C(6)15N(4)(R) @ 32                              | 0.0293627   | 3524.74121 | 1175.921 | 3524.71143 | 1175.91113 | 3 | 24 | 17.3368 | 29.99 |
| 24 | 27.17 | 29.2 | 66.8 | ICOSLG_FlexIII | 99.0 | TPSVNIGCCIE NVLQQNLT VGSQT GNDIGERDK | Propionamide(C) @ 8; Propionamide(C) @ 9; Deamidated(Q) @ 17; Label: 13C(6)15N(4)(R) @ 32; Label: 13C(6)15N(2)(K) @ 34 | 8.02E-05    | 3775.84766 | 944.9692 | 3775.84766 | 944.969177 | 4 | 19 | 17.2257 | 29.99 |
| 24 | 27.17 | 29.2 | 66.8 | ICOSLG_FlexIII | 99.0 | TPSVNIGCCIE NVLQQNLT VGSQT GNDIGERDK | Propionamide(C) @ 8; Propionamide(C) @ 9; Deamidated(Q) @ 16; Label: 13C(6)15N(4)(R) @ 32; Label: 13C(6)15N(2)(K) @ 34 | 0.0159036   | 3775.86231 | 1259.628 | 3775.84766 | 1259.62317 | 3 | 22 | 17.4783 | 29.99 |
| 24 | 27.17 | 29.2 | 66.8 | ICOSLG_FlexIII | 99.0 | TVVTYHIPQNSSLENVDSR                  | Label: 13C(6)15N(4)(R) @ 19                                                                                            | 0.00011966  | 2168.07422 | 543.0258 | 2168.07373 | 543.025696 | 4 | 18 | 13.7619 | 29.99 |
| 24 | 27.17 | 29.2 | 66.8 | ICOSLG_FlexIII | 99.0 | TVVTYHIPQNSSLENVDSR                  | Label: 13C(6)15N(4)(R) @ 19                                                                                            | 0.00379706  | 2168.07764 | 723.6998 | 2168.07373 | 723.698547 | 3 | 14 | 13.7654 | 29.99 |
| 24 | 27.17 | 29.2 | 66.8 | ICOSLG_FlexIII | 99.0 | TVVTYHIPQNSSLENVDSR                  | Label: 13C(6)15N(4)(R) @ 19                                                                                            | -0.0104698  | 2168.06323 | 1085.039 | 2168.07373 | 1085.04419 | 2 | 26 | 13.9449 | 29.99 |
| 24 | 27.17 | 29.2 | 66.8 | ICOSLG_FlexIII | 99.0 | TVVTYHIPQNSSLENVDSR                  | Label: 13C(6)15N(4)(R) @ 19                                                                                            | -0.00187919 | 2168.07178 | 723.6979 | 2168.07373 | 723.698547 | 3 | 20 | 14.0349 | 29.99 |
| 24 | 27.17 | 29.2 | 66.8 | ICOSLG_FlexIII | 99.0 | TVVTYHIPQNSSLENVDSR                  | Label: 13C(6)15N(4)(R) @ 19                                                                                            | -0.0048546  | 2168.06934 | 1085.042 | 2168.07373 | 1085.04419 | 2 | 26 | 14.2074 | 29.99 |
| 24 | 27.17 | 29.2 | 66.8 | ICOSLG_FlexIII | 99.0 | TVVTYHIPQNSSLENVDSR                  | Label: 13C(6)15N(4)(R) @ 19                                                                                            | -0.00792166 | 2168.06592 | 723.6959 | 2168.07373 | 723.698547 | 3 | 18 | 14.305  | 29.99 |
| 24 | 27.17 | 29.2 | 66.8 | ICOSLG_FlexIII | 99.0 | TVVTYHIPQNSSLENVDSR                  | Label: 13C(6)15N(4)(R) @ 19                                                                                            | 0.00379706  | 2168.07764 | 723.6998 | 2168.07373 | 723.698547 | 3 | 16 | 14.5651 | 29.99 |
| 24 | 27.17 | 29.2 | 66.8 | ICOSLG_FlexIII | 99.0 | TVVTYHIPQNSSLENVDSR                  | Label: 13C(6)15N(4)(R) @ 19                                                                                            | 0.00050117  | 2168.07446 | 723.6987 | 2168.07373 | 723.698547 | 3 | 11 | 25.2134 | 29.99 |
| 24 | 27.17 | 29.2 | 66.8 | ICOSLG_FlexIII | 99.0 | TVVTYHIPQNSSLENVDSR                  | Deamidated(N) @ 10; Label: 13C(6)15N(4)(R) @ 19                                                                        | 0.000983027 | 2169.06763 | 724.0298 | 2169.05786 | 724.02655  | 3 | 11 | 25.4693 | 29.99 |
| 24 | 27.17 | 29.2 | 66.8 | ICOSLG_FlexIII | 99.0 | TVVTYHIPQNSSLENVDSR                  | Label: 13C(6)15N(4)(R) @ 19                                                                                            | -0.00755545 | 2168.06616 | 723.696  | 2168.07373 | 723.698547 | 3 | 8  | 26.5094 | 29.99 |
| 24 | 27.17 | 29.2 | 66.8 | ICOSLG_FlexIII | 99.0 | TVVTYHIPQNSSLENVDSR                  | Deamidated(Q) @ 9; Label: 13C(6)15N(4)(R) @ 19                                                                         | 0.0106726   | 2169.06836 | 724.0301 | 2169.05786 | 724.02655  | 3 | 12 | 14.1053 | 29.99 |
| 24 | 27.17 | 29.2 | 66.8 | ICOSLG_FlexIII | 99.0 | TVVTYHIPQNSSLENVDSR                  | Label: 13C(6)15N(4)(R) @ 19                                                                                            | 0.00379706  | 2168.07764 | 723.6998 | 2168.07373 | 723.698547 | 3 | 9  | 25.7266 | 29.99 |
| 24 | 27.17 | 29.2 | 66.8 | ICOSLG_FlexIII | 99.0 | TVVTYHIPQNSSLENVDSR                  | Label: 13C(6)15N(4)(R) @ 19                                                                                            | -0.00407645 | 2168.06934 | 723.6971 | 2168.07373 | 723.698547 | 3 | 11 | 24.9599 | 29.99 |
| 24 | 27.17 | 29.2 | 66.8 | ICOSLG_FlexIII | 99.0 | TVVTYHIPQNSSLENVDSR                  | Deamidated(N) @ 10; Label: 13C(6)15N(4)(R) @ 19                                                                        | 0.0341679   | 2169.09204 | 543.2803 | 2169.05786 | 543.271729 | 4 | 12 | 14.0372 | 29.99 |
| 24 | 27.17 | 29.2 | 66.8 | ICOSLG_FlexIII | 99.0 | TVVTYHIPQNSSLENVDSR                  | Deamidated(N) @ 10; Label: 13C(6)15N(4)(R) @ 19                                                                        | 0.00983027  | 2169.06763 | 724.0298 | 2169.05786 | 724.02655  | 3 | 8  | 25.9899 | 29.99 |
| 24 | 27.17 | 29.2 | 66.8 | ICOSLG_FlexIII | 99.0 | TVVTYHIPQNSSLENVDSR                  | Deamidated(Q) @ 9; Label: 13C(6)15N(4)(R) @ 19                                                                         | 0.00983027  | 2169.06763 | 724.0298 | 2169.05786 | 724.02655  | 3 | 11 | 24.7007 | 29.99 |
| 24 | 27.17 | 29.2 | 66.8 | ICOSLG_FlexIII | 99.0 | TVVTYHIPQNSSLENVDSR                  | Deamidated(Q) @ 9; Label: 13C(6)15N(4)(R) @ 19                                                                         | 0.00983027  | 2169.06763 | 724.0298 | 2169.05786 | 724.02655  | 3 | 10 | 18.4187 | 29.99 |
| 24 | 27.17 | 29.2 | 66.8 | ICOSLG_FlexIII | 99.0 | TVVTYHIPQNSSLENVDSR                  | Deamidated(Q) @ 9; Label: 13C(6)15N(4)(R) @ 19                                                                         | 0.0255316   | 2169.08325 | 1085.549 | 2169.05786 | 1085.53613 | 2 | 11 | 14.5051 | 29.99 |
| 24 | 27.17 | 29.2 | 66.8 | ICOSLG_FlexIII | 99.0 | YPTFLYK                              | Label: 13C(6)15N(2)(K) @ 7                                                                                             | 0.00057017  | 938.499878 | 470.2572 | 938.499329 | 470.256928 | 2 | 9  | 15.0367 | 29.99 |
| 24 | 27.17 | 29.2 | 66.8 | ICOSLG_FlexIII | 99.0 | YPTFLYK                              | Label: 13C(6)15N(2)(K) @ 7                                                                                             | 0.00819955  | 938.507446 | 470.261  | 938.499329 | 470.256928 | 2 | 9  | 14.7754 | 29.99 |
| 24 | 27.17 | 29.2 | 66.8 | ICOSLG_FlexIII | 99.0 | YPTFLYK                              | Label: 13C(6)15N(2)(K) @ 7                                                                                             | 0.00073716  |            |          |            |            |   |    |         |       |

|    |       |       |                    |                           |                                                                                   |                     |             |            |          |            |            |   |    |         |      |
|----|-------|-------|--------------------|---------------------------|-----------------------------------------------------------------------------------|---------------------|-------------|------------|----------|------------|------------|---|----|---------|------|
| 26 | 25.25 | 27.61 | 59.3 HOXC9_Flaxill | 99.0 SYPDYMYGSPGELR       | Label: 13C(6)15N(4)(R)@ 14                                                        |                     | -0.00107282 | 1643.71545 | 822.865  | 1643.71655 | 822.86554  | 2 | 16 | 15.2895 | 9.65 |
| 26 | 25.25 | 27.61 | 59.3 HOXC9_Flaxill | 99.0 TDKEQSYPTFLYK        | Label: 13C(6)15N(2)(K)@ 3; Label: 13C(6)15N(2)(K)@ 13                             | missed K-E@ 3       | -0.0105193  | 1634.80591 | 818.4102 | 1634.81628 | 818.415405 | 2 | 15 | 15.7459 | 9.65 |
| 26 | 25.25 | 27.61 | 59.3 HOXC9_Flaxill | 99.0 TWLEPLSGAVSFPSFPAGGR |                                                                                   |                     | 0.00456033  | 2075.05127 | 1038.533 | 2075.04761 | 1038.53113 | 2 | 23 | 17.9216 | 9.65 |
| 26 | 25.25 | 27.61 | 59.3 HOXC9_Flaxill | 99.0 ADCGPGEGGR           | Propionamide(C)@ 3; Label: 13C(6)15N(4)(R)@ 9                                     |                     | -0.00567559 | 941.38446  | 471.6995 | 941.390076 | 471.702301 | 2 | 7  | 8.2176  | 9.65 |
| 26 | 25.25 | 27.61 | 59.3 HOXC9_Flaxill | 99.0 ADLPSNPVANWIHAR      | Label: 13C(6)15N(4)(R)@ 16                                                        |                     | 0.00476752  | 1784.88831 | 893.4514 | 1784.88833 | 893.448975 | 2 | 19 | 16.9324 | 9.65 |
| 26 | 25.25 | 27.61 | 59.3 HOXC9_Flaxill | 99.0 ADLPSNPVANWIHAR      | Label: 13C(6)15N(4)(R)@ 16                                                        |                     | -0.00106778 | 1784.8822  | 595.968  | 1784.8833  | 595.968384 | 3 | 16 | 17.1752 | 9.65 |
| 26 | 25.25 | 27.61 | 59.3 HOXC9_Flaxill | 99.0 ADLPSNPVANWIHAR      | Label: 13C(6)15N(4)(R)@ 16                                                        |                     | -0.00084773 | 1784.88245 | 893.4485 | 1784.8833  | 893.448975 | 2 | 20 | 17.2    | 9.65 |
| 26 | 25.25 | 27.61 | 59.3 HOXC9_Flaxill | 99.0 ADLPSNPVANWIHAR      | Label: 13C(6)15N(4)(R)@ 16                                                        |                     | -0.00121394 | 1784.88232 | 893.4484 | 1784.8833  | 893.448975 | 2 | 20 | 17.4594 | 9.65 |
| 26 | 25.25 | 27.61 | 59.3 HOXC9_Flaxill | 99.0 ADLPSNPVANWIHAR      | Label: 13C(6)15N(4)(R)@ 16                                                        |                     | 0.00314365  | 1784.88648 | 595.9694 | 1784.8833  | 595.968384 | 3 | 16 | 17.7046 | 9.65 |
| 26 | 25.25 | 27.61 | 59.3 HOXC9_Flaxill | 99.0 ADLPSNPVANWIHAR      | Label: 13C(6)15N(4)(R)@ 16                                                        |                     | -0.00234952 | 1784.88098 | 595.9676 | 1784.8833  | 595.968384 | 3 | 12 | 16.8992 | 9.65 |
| 26 | 25.25 | 27.61 | 59.3 HOXC9_Flaxill | 99.0 ADLPSNPVANWIHAR      | Deamidated(N)@ 7                                                                  |                     | 0.0281103   | 1775.88733 | 592.9697 | 1775.85913 | 592.960327 | 3 | 12 | 17.5252 | 9.65 |
| 26 | 25.25 | 27.61 | 59.3 HOXC9_Flaxill | 99.0 APQTLPSPEADALAGSK    | Deamidated(Q)@ 3; Label: 13C(6)15N(2)(K)@ 17                                      |                     | 0.0271353   | 1660.86694 | 554.6296 | 1660.83997 | 554.620606 | 3 | 14 | 14.1041 | 9.65 |
| 26 | 25.25 | 27.61 | 59.3 HOXC9_Flaxill | 99.0 DRAPQTLPSPEADALAGSK  | Label: 13C(6)15N(4)(R)@ 2; Label: 13C(6)15N(2)(K)@ 19                             | missed R-A@ 2       | -0.0145916  | 1940.97766 | 647.9998 | 1940.99219 | 648.0047   | 3 | 17 | 13.7797 | 9.65 |
| 26 | 25.25 | 27.61 | 59.3 HOXC9_Flaxill | 99.0 DRAPQTLPSPEADALAGSK  | Label: 13C(6)15N(4)(R)@ 2; Label: 13C(6)15N(2)(K)@ 19                             | missed R-A@ 2       | 0.014254    | 1941.00647 | 971.5105 | 1940.99219 | 971.503418 | 2 | 23 | 14.0734 | 9.65 |
| 26 | 25.25 | 27.61 | 59.3 HOXC9_Flaxill | 99.0 DRAPQTLPSPEADALAGSK  | Label: 13C(6)15N(4)(R)@ 2; Label: 13C(6)15N(2)(K)@ 19                             | missed R-A@ 2       | -0.00232354 | 1940.98987 | 648.0039 | 1940.99219 | 648.0047   | 3 | 17 | 14.3233 | 9.65 |
| 26 | 25.25 | 27.61 | 59.3 HOXC9_Flaxill | 99.0 DRAPQTLPSPEADALAGSK  | Label: 13C(6)15N(4)(R)@ 2; Label: 13C(6)15N(2)(K)@ 19                             | missed R-A@ 2       | -0.0057656  | 1940.98645 | 971.5005 | 1940.99219 | 971.503418 | 2 | 15 | 14.3562 | 9.65 |
| 26 | 25.25 | 27.61 | 59.3 HOXC9_Flaxill | 99.0 DRAPQTLPSPEADALAGSK  | Label: 13C(6)15N(4)(R)@ 2; Label: 13C(6)15N(2)(K)@ 19                             | missed R-A@ 2       | -0.0145916  | 1940.97766 | 647.9998 | 1940.99219 | 648.0047   | 3 | 15 | 14.6145 | 9.65 |
| 26 | 25.25 | 27.61 | 59.3 HOXC9_Flaxill | 99.0 DRAPQTLPSPEADALAGSK  | Label: 13C(6)15N(4)(R)@ 2; Deamidated(Q)@ 5; Label: 13C(6)15N(2)(K)@ 19           | missed R-A@ 2       | 0.0102209   | 1941.98645 | 972.0005 | 1941.9762  | 971.995422 | 2 | 12 | 13.81   | 9.65 |
| 26 | 25.25 | 27.61 | 59.3 HOXC9_Flaxill | 99.0 HYALKPDAYPGR         | Label: 13C(6)15N(2)(K)@ 5; Label: 13C(6)15N(4)(R)@ 12                             |                     | -0.00158562 | 1404.72546 | 469.2491 | 1404.72693 | 469.249573 | 3 | 15 | 12.3608 | 9.65 |
| 26 | 25.25 | 27.61 | 59.3 HOXC9_Flaxill | 99.0 HYALKPDAYPGR         | Label: 13C(6)15N(2)(K)@ 5; Label: 13C(6)15N(4)(R)@ 12                             |                     | -0.00158562 | 1404.72546 | 469.2491 | 1404.72693 | 469.249573 | 3 | 13 | 12.6199 | 9.65 |
| 26 | 25.25 | 27.61 | 59.3 HOXC9_Flaxill | 99.0 HYALKPDAYPGR         | Label: 13C(6)15N(2)(K)@ 5; Label: 13C(6)15N(4)(R)@ 12                             |                     | 0.00198495  | 1404.72876 | 469.2502 | 1404.72693 | 469.249573 | 3 | 13 | 12.8889 | 9.65 |
| 26 | 25.25 | 27.61 | 59.3 HOXC9_Flaxill | 99.0 HYALKPDAYPGR         | Label: 13C(6)15N(2)(K)@ 5; Label: 13C(6)15N(4)(R)@ 12                             |                     | -0.00067009 | 1404.72632 | 469.2494 | 1404.72693 | 469.249573 | 3 | 13 | 16.3752 | 9.65 |
| 26 | 25.25 | 27.61 | 59.3 HOXC9_Flaxill | 99.0 HYALKPDAYPGR         | Label: 13C(6)15N(2)(K)@ 5; Label: 13C(6)15N(4)(R)@ 12                             |                     | -0.00250115 | 1404.72424 | 469.2487 | 1404.72693 | 469.249573 | 3 | 13 | 16.6433 | 9.65 |
| 26 | 25.25 | 27.61 | 59.3 HOXC9_Flaxill | 99.0 HYALKPDAYPGR         | Label: 13C(6)15N(2)(K)@ 5; Label: 13C(6)15N(4)(R)@ 12                             |                     | -0.00158562 | 1404.72546 | 469.2491 | 1404.72693 | 469.249573 | 3 | 13 | 16.9186 | 9.65 |
| 26 | 25.25 | 27.61 | 59.3 HOXC9_Flaxill | 99.0 HYALKPDAYPGR         | Label: 13C(6)15N(2)(K)@ 5; Label: 13C(6)15N(4)(R)@ 12                             |                     | -0.00039543 | 1404.72669 | 469.2495 | 1404.72693 | 469.249573 | 3 | 13 | 17.1786 | 9.65 |
| 26 | 25.25 | 27.61 | 59.3 HOXC9_Flaxill | 99.0 HYALKPDAYPGR         | Label: 13C(6)15N(2)(K)@ 5; Label: 13C(6)15N(4)(R)@ 12                             |                     | -0.00039543 | 1404.72669 | 469.2495 | 1404.72693 | 469.249573 | 3 | 8  | 26.9179 | 9.65 |
| 26 | 25.25 | 27.61 | 59.3 HOXC9_Flaxill | 99.0 HYALKPDAYPGR         | Label: 13C(6)15N(2)(K)@ 5; Label: 13C(6)15N(4)(R)@ 12                             |                     | -0.00039543 | 1404.72669 | 469.2495 | 1404.72693 | 469.249573 | 3 | 8  | 27.3189 | 9.65 |
| 26 | 25.25 | 27.61 | 59.3 HOXC9_Flaxill | 99.0 HYALKPDAYPGR         | Label: 13C(6)15N(2)(K)@ 5; Label: 13C(6)15N(4)(R)@ 12                             |                     | 0.0005201   | 1404.72754 | 469.2498 | 1404.72693 | 469.249573 | 3 | 7  | 27.8389 | 9.65 |
| 26 | 25.25 | 27.61 | 59.3 HOXC9_Flaxill | 99.0 HYALKPDAYPGR         | Label: 13C(6)15N(2)(K)@ 5; Label: 13C(6)15N(4)(R)@ 12                             |                     | -0.00039543 | 1404.72669 | 469.2495 | 1404.72693 | 469.249573 | 3 | 11 | 13.4291 | 9.65 |
| 26 | 25.25 | 27.61 | 59.3 HOXC9_Flaxill | 99.0 HYALKPDAYPGR         | Label: 13C(6)15N(2)(K)@ 5; Label: 13C(6)15N(4)(R)@ 12                             |                     | -0.00039543 | 1404.72669 | 469.2495 | 1404.72693 | 469.249573 | 3 | 11 | 14.7198 | 9.65 |
| 26 | 25.25 | 27.61 | 59.3 HOXC9_Flaxill | 99.0 HYALKPDAYPGR         | Label: 13C(6)15N(2)(K)@ 5; Label: 13C(6)15N(4)(R)@ 12                             |                     | 0.00537883  | 1404.7323  | 703.3734 | 1404.72693 | 703.370728 | 2 | 11 | 12.9148 | 9.65 |
| 26 | 25.25 | 27.61 | 59.3 HOXC9_Flaxill | 99.0 HYALKPDAYPGR         | Label: 13C(6)15N(2)(K)@ 5; Label: 13C(6)15N(4)(R)@ 12; Label: 13C(6)15N(4)(R)@ 13 | missed R-R@ 12      | 0.00056288  | 1570.83704 | 524.6196 | 1570.8363  | 524.619385 | 3 | 11 | 18.0247 | 9.65 |
| 26 | 25.25 | 27.61 | 59.3 HOXC9_Flaxill | 99.0 SYPDYMYGSPGELR       | Label: 13C(6)15N(4)(R)@ 14                                                        |                     | -0.00082868 | 1643.7157  | 822.8651 | 1643.71655 | 822.86554  | 2 | 17 | 15.0307 | 9.65 |
| 26 | 25.25 | 27.61 | 59.3 HOXC9_Flaxill | 99.0 SYPDYMYGSPGELR       | Label: 13C(6)15N(4)(R)@ 14                                                        |                     | -0.00082868 | 1643.7157  | 822.8651 | 1643.71655 | 822.86554  | 2 | 14 | 14.7721 | 9.65 |
| 26 | 25.25 | 27.61 | 59.3 HOXC9_Flaxill | 99.0 SYPDYMYGSPGELR       | Label: 13C(6)15N(4)(R)@ 14                                                        |                     | -0.00246876 | 1633.70593 | 817.8602 | 1633.70825 | 817.861389 | 2 | 14 | 14.8628 | 9.65 |
| 26 | 25.25 | 27.61 | 59.3 HOXC9_Flaxill | 99.0 SYPDYMYGSPGELR       | Label: 13C(6)15N(4)(R)@ 14                                                        |                     | -0.00959367 | 1643.70703 | 548.9096 | 1643.71655 | 548.912781 | 3 | 11 | 14.8606 | 9.65 |
| 26 | 25.25 | 27.61 | 59.3 HOXC9_Flaxill | 99.0 SYPDYMYGSPGELR       | Label: 13C(6)15N(4)(R)@ 14                                                        |                     | 0.00930318  | 1643.72583 | 822.8702 | 1643.71655 | 822.86554  | 2 | 11 | 15.8689 | 9.65 |
| 26 | 25.25 | 27.61 | 59.3 HOXC9_Flaxill | 99.0 TDKEQSYPTFLYK        | Label: 13C(6)15N(2)(K)@ 3; Label: 13C(6)15N(2)(K)@ 13                             | missed K-E@ 3       | -0.0105193  | 1634.80591 | 818.4102 | 1634.81628 | 818.415405 | 2 | 16 | 14.587  | 9.65 |
| 26 | 25.25 | 27.61 | 59.3 HOXC9_Flaxill | 99.0 TDKEQSYPTFLYK        | Label: 13C(6)15N(2)(K)@ 3; Label: 13C(6)15N(2)(K)@ 13                             | missed K-E@ 3       | 0.0095003   | 1634.82593 | 818.4202 | 1634.81628 | 818.415405 | 2 | 17 | 16.0285 | 9.65 |
| 26 | 25.25 | 27.61 | 59.3 HOXC9_Flaxill | 99.0 TDKEQSYPTFLYK        | Label: 13C(6)15N(2)(K)@ 3; Label: 13C(6)15N(2)(K)@ 13                             | missed K-E@ 3       | 0.00132158  | 1634.81763 | 818.4161 | 1634.81628 | 818.415405 | 2 | 18 | 16.2928 | 9.65 |
| 26 | 25.25 | 27.61 | 59.3 HOXC9_Flaxill | 99.0 TDKEQSYPTFLYK        | Label: 13C(6)15N(2)(K)@ 3; Label: 13C(6)15N(2)(K)@ 13                             | missed K-E@ 3       | 0.0107451   | 1634.8269  | 545.9496 | 1634.81628 | 545.946045 | 3 | 14 | 15.7436 | 9.65 |
| 26 | 25.25 | 27.61 | 59.3 HOXC9_Flaxill | 99.0 TDKEQSYPTFLYK        | Label: 13C(6)15N(2)(K)@ 3; Label: 13C(6)15N(2)(K)@ 13                             | missed K-E@ 3       | 0.0095003   | 1634.82593 | 818.4202 | 1634.81628 | 818.415405 | 2 | 14 | 16.5623 | 9.65 |
| 26 | 25.25 | 27.61 | 59.3 HOXC9_Flaxill | 99.0 TDKEQSYPTFLYK        | Label: 13C(6)15N(2)(K)@ 3; Label: 13C(6)15N(2)(K)@ 13                             | missed K-E@ 3       | 0.0107451   | 1634.8269  | 545.9496 | 1634.81628 | 545.946045 | 3 | 13 | 14.5829 | 9.65 |
| 26 | 25.25 | 27.61 | 59.3 HOXC9_Flaxill | 99.0 TDKEQSYPTFLYK        | Label: 13C(6)15N(2)(K)@ 3; Label: 13C(6)15N(2)(K)@ 13                             | missed K-E@ 3       | 0.00287155  | 1634.81921 | 545.947  | 1634.81628 | 545.946045 | 3 | 13 | 16.024  | 9.65 |
| 26 | 25.25 | 27.61 | 59.3 HOXC9_Flaxill | 99.0 TDKEQSYPTFLYK        | Label: 13C(6)15N(2)(K)@ 3; Label: 13C(6)15N(2)(K)@ 13                             | missed K-E@ 3       | 0.0107451   | 1634.8269  | 545.9496 | 1634.81628 | 545.946045 | 3 | 13 | 16.2906 | 9.65 |
| 26 | 25.25 | 27.61 | 59.3 HOXC9_Flaxill | 99.0 TDKEQSYPTFLYK        | Label: 13C(6)15N(2)(K)@ 3; Label: 13C(6)15N(2)(K)@ 13                             | missed K-E@ 3       | 0.0107451   | 1634.8269  | 545.9496 | 1634.81628 | 545.946045 | 3 | 13 | 16.5408 | 9.65 |
| 26 | 25.25 | 27.61 | 59.3 HOXC9_Flaxill | 99.0 TDKEQSYPTFLYK        | Label: 13C(6)15N(2)(K)@ 3; Label: 13C(6)15N(2)(K)@ 13                             | missed K-E@ 3       | -0.0105193  | 1634.80591 | 818.4102 | 1634.81628 | 818.415405 | 2 | 12 | 15.1917 | 9.65 |
| 26 | 25.25 | 27.61 | 59.3 HOXC9_Flaxill | 99.0 TWLEPLSGAVSFPSFPAGGR | Label: 13C(6)15N(4)(R)@ 20                                                        |                     | 0.00427137  | 2085.06006 | 696.0273 | 2085.05591 | 696.025879 | 3 | 20 | 17.8081 | 9.65 |
| 26 | 25.25 | 27.61 | 59.3 HOXC9_Flaxill | 99.0 TWLEPLSGAVSFPSFPAGGR | Label: 13C(6)15N(4)(R)@ 20                                                        |                     | 0.00656663  | 2085.06128 | 1043.538 | 2085.05591 | 1043.53528 | 2 | 24 | 17.8369 | 9.65 |
| 26 | 25.25 | 27.61 | 59.3 HOXC9_Flaxill | 99.0 TWLEPLSGAVSFPSFPAGGR | Label: 13C(6)15N(4)(R)@ 20                                                        |                     | 0.00463758  | 2085.06079 | 696.0275 | 2085.05591 | 696.025879 | 3 | 20 | 18.0861 | 9.65 |
| 26 | 25.25 | 27.61 | 59.3 HOXC9_Flaxill | 99.0 TWLEPLSGAVSFPSFPAGGR | Label: 13C(6)15N(4)(R)@ 20                                                        |                     | 0.00632248  | 2085.06128 | 1043.538 | 2085.05591 | 1043.53528 | 2 | 23 | 18.1123 | 9.65 |
| 26 | 25.25 | 27.61 | 59.3 HOXC9_Flaxill | 99.0 TWLEPLSGAVSFPSFPAGGR | Label: 13C(6)15N(4)(R)@ 20                                                        |                     | 0.0109612   | 2085.06738 | 1043.541 | 2085.05591 | 1043.53528 | 2 | 18 | 18.3703 | 9.65 |
| 26 | 25.25 | 27.61 | 59.3 HOXC9_Flaxill | 99.0 TWLEPLSGAVSFPSFPAGGR | Label: 13C(6)15N(4)(R)@ 20                                                        |                     | 0.0109612   | 2085.06738 | 1043.541 | 2085.05591 | 1043.53528 | 2 | 14 | 18.758  | 9.65 |
| 26 | 25.25 | 27.61 | 59.3 HOXC9_Flaxill | 99.0 YPTFLYK              | Label: 13C(6)15N(2)(K)@ 7                                                         | cleaved S-Y@ N-term | 0.00057017  | 938.499878 | 470.2572 | 938.499329 | 470.256928 | 2 | 9  | 15.0367 | 9.65 |
| 26 | 25.25 | 27.61 | 59.3 HOXC9_Flaxill | 99.0 YPTFLYK              | Label: 13C(6)15N(2)(K)@ 7                                                         | cleaved S-Y@ N-term | 0.00619955  | 938.507446 | 470.261  | 938.499329 | 470.256928 | 2 | 9  | 14.7754 | 9.65 |
| 26 | 25.25 | 27.61 | 59.3 HOXC9_Flaxill | 99.0 YPTFLYK              | Label: 13C(6)15N(2)(K)@ 7                                                         | cleaved S-Y@ N-term | 0.00073716  | 938.500061 | 470.2573 | 938.499329 | 470.256928 | 2 | 9  | 15.0782 | 9.65 |
| 26 | 25.25 | 27.61 | 59.3 HOXC9_Flaxill | 99.0 YPTFLYK              | Label: 13C(6)15N(2)(K)@ 7                                                         | cleaved S-Y@ N-term | 0.00902027  | 938.500244 | 470.2574 | 938.499329 | 470.256928 | 2 | 9  | 14.8156 | 9.65 |
| 27 | 25.18 | 29.37 | 75.4 RBP5_Flaxill  | 99.0 CQITV/TWEEHLVCVQK    | Propionamide(C)@ 1; Propionamide(C)                                               |                     |             |            |          |            |            |   |    |         |      |

|    |       |       |                   |                              |                                                                                                                            |             |            |            |            |            |    |         |         |       |
|----|-------|-------|-------------------|------------------------------|----------------------------------------------------------------------------------------------------------------------------|-------------|------------|------------|------------|------------|----|---------|---------|-------|
| 27 | 25.18 | 29.37 | 75.4 RBP5_FlexII  | 99.0 DAVCEQVFR               | Propionamide(C)@4                                                                                                          | -0.00318378 | 1136.52527 | 569.2699   | 1136.52844 | 569.271484 | 2  | 10      | 13.789  | 22.16 |
| 27 | 25.18 | 29.37 | 75.4 RBP5_FlexII  | 99.0 IALLKPKDK               | Label: 13C(6)15N(2)(K)@6; Label: 13C(6)15N(2)(K)@9                                                                         | 0.00303014  | 1025.68506 | 342.9023   | 1025.68201 | 342.901276 | 3  | 9       | 14.2611 | 22.16 |
| 27 | 25.18 | 29.37 | 75.4 RBP5_FlexII  | 99.0 CQTIVTWEEHLVCVQK        | Propionamide(C)@1; Propionamide(C)@14; Label: 13C(6)15N(2)(K)@17                                                           | -0.00260091 | 2194.06128 | 1098.038   | 2194.06421 | 1098.03943 | 2  | 24      | 15.3748 | 22.16 |
| 27 | 25.18 | 29.37 | 75.4 RBP5_FlexII  | 99.0 CQTIVTWEEHLVCVQK        | Propionamide(C)@1; Propionamide(C)@14; Label: 13C(6)15N(2)(K)@17                                                           | -0.0005797  | 2194.06372 | 732.3618   | 2194.06421 | 732.362    | 3  | 16      | 15.6345 | 22.16 |
| 27 | 25.18 | 29.37 | 75.4 RBP5_FlexII  | 99.0 CQTIVTWEEHLVCVQK        | Propionamide(C)@1; Propionamide(C)@14; Label: 13C(6)15N(2)(K)@17                                                           | -0.00308919 | 2194.06128 | 1098.038   | 2194.06421 | 1098.03943 | 2  | 23      | 15.6357 | 22.16 |
| 27 | 25.18 | 29.37 | 75.4 RBP5_FlexII  | 99.0 CQTIVTWEEHLVCVQK        | Propionamide(C)@1; Propionamide(C)@14; Label: 13C(6)15N(2)(K)@17                                                           | -3.04E-05   | 2194.06421 | 732.362    | 2194.06421 | 732.362    | 3  | 16      | 15.8938 | 22.16 |
| 27 | 25.18 | 29.37 | 75.4 RBP5_FlexII  | 99.0 CQTIVTWEEHLVCVQK        | Propionamide(C)@1; Propionamide(C)@14; Label: 13C(6)15N(2)(K)@17                                                           | -0.00089193 | 2194.06323 | 1098.039   | 2194.06421 | 1098.03943 | 2  | 24      | 15.9226 | 22.16 |
| 27 | 25.18 | 29.37 | 75.4 RBP5_FlexII  | 99.0 CQTIVTWEEHLVCVQK        | Propionamide(C)@1; Propionamide(C)@14; Label: 13C(6)15N(2)(K)@17                                                           | -0.0079039  | 2194.0564  | 732.3594   | 2194.06421 | 732.362    | 3  | 13      | 17.0792 | 22.16 |
| 27 | 25.18 | 29.37 | 75.4 RBP5_FlexII  | 99.0 CQTIVTWEEHLVCVQK        | Propionamide(C)@1; Deamidated(Q)@2; Propionamide(C)@14; Label: 13C(6)15N(2)(K)@17                                          | 0.028158    | 2195.07642 | 732.6994   | 2195.04834 | 732.690002 | 3  | 13      | 15.3593 | 22.16 |
| 27 | 25.18 | 29.37 | 75.4 RBP5_FlexII  | 99.0 CQTIVTWEEHLVCVQK        | Propionamide(C)@1; Deamidated(Q)@2; Propionamide(C)@14; Label: 13C(6)15N(2)(K)@17                                          | 0.028158    | 2195.07642 | 732.6994   | 2195.04834 | 732.690002 | 3  | 13      | 16.1617 | 22.16 |
| 27 | 25.18 | 29.37 | 75.4 RBP5_FlexII  | 99.0 CQTIVTWEEHLVCVQK        | Propionamide(C)@1; Deamidated(Q)@2; Propionamide(C)@14; Label: 13C(6)15N(2)(K)@17                                          | 0.028158    | 2195.07642 | 732.6994   | 2195.04834 | 732.690002 | 3  | 13      | 16.4217 | 22.16 |
| 27 | 25.18 | 29.37 | 75.4 RBP5_FlexII  | 99.0 CQTIVTWEEHLVCVQK        | Propionamide(C)@1; Propionamide(C)@14; Label: 13C(6)15N(2)(K)@17                                                           | 0.00143446  | 2194.06567 | 732.3625   | 2194.06421 | 732.362    | 3  | 11      | 17.4919 | 22.16 |
| 27 | 25.18 | 29.37 | 75.4 RBP5_FlexII  | 99.0 CQTIVTWEEHLVCVQK        | Propionamide(C)@1; Propionamide(C)@14; Label: 13C(6)15N(2)(K)@17                                                           | -0.0079039  | 2194.0564  | 732.3594   | 2194.06421 | 732.362    | 3  | 11      | 17.7566 | 22.16 |
| 27 | 25.18 | 29.37 | 75.4 RBP5_FlexII  | 99.0 CQTIVTWEEHLVCVQKQGEVPNR | Propionamide(C)@1; Propionamide(C)@14; Label: 13C(6)15N(2)(K)@17; Label: 13C(6)15N(4)(R)@23                                | -0.00736343 | 2856.39429 | 953.1387   | 2856.40186 | 953.141174 | 3  | 13      | 16.1997 | 22.16 |
| 27 | 25.18 | 29.37 | 75.4 RBP5_FlexII  | 99.0 DAVCEQVFRK              | Propionamide(C)@4; Label: 13C(6)15N(4)(R)@9; Label: 13C(6)15N(2)(K)@10                                                     | -0.00093989 | 1282.64502 | 642.3298   | 1282.64587 | 642.3302   | 2  | 10      | 13.0926 | 22.16 |
| 27 | 25.18 | 29.37 | 75.4 RBP5_FlexII  | 99.0 IALLKPKDKEIEHOGNHMTVR   | Label: 13C(6)15N(2)(K)@6; Label: 13C(6)15N(2)(K)@9; Label: 13C(6)15N(4)(R)@21                                              | 0.000226842 | 2467.3606  | 617.8474   | 2467.35791 | 617.846741 | 4  | 12      | 17.0526 | 22.16 |
| 27 | 25.18 | 29.37 | 75.4 RBP5_FlexII  | 99.0 IALLKPKDKEIEHOGNHMTVR   | Label: 13C(6)15N(2)(K)@6; Label: 13C(6)15N(2)(K)@9; Label: 13C(6)15N(4)(R)@21                                              | 0.00627327  | 2467.36401 | 494.4801   | 2467.35791 | 494.478882 | 5  | 11      | 16.6034 | 22.16 |
| 27 | 25.18 | 29.37 | 75.4 RBP5_FlexII  | 99.0 IALLKPKDKEIEHOGNHMTVR   | Label: 13C(6)15N(2)(K)@6; Label: 13C(6)15N(2)(K)@9; Label: 13C(6)15N(4)(R)@21                                              | 0.0117899   | 2467.36963 | 617.8497   | 2467.35791 | 617.846741 | 4  | 11      | 16.7089 | 22.16 |
| 27 | 25.18 | 29.37 | 75.4 RBP5_FlexII  | 99.0 KCQITVWEEHLVCVQK        | Label: 13C(6)15N(2)(K)@1; Propionamide(C)@2; Propionamide(C)@15; Label: 13C(6)15N(2)(K)@18                                 | -0.00749265 | 2330.16577 | 777.7292   | 2330.17334 | 777.731751 | 3  | 21      | 15.3413 | 22.16 |
| 27 | 25.18 | 29.37 | 75.4 RBP5_FlexII  | 99.0 KCQITVWEEHLVCVQK        | Label: 13C(6)15N(2)(K)@1; Propionamide(C)@2; Propionamide(C)@15; Label: 13C(6)15N(2)(K)@18                                 | -0.00090087 | 2330.17236 | 777.7314   | 2330.17334 | 777.731751 | 3  | 22      | 15.6    | 22.16 |
| 27 | 25.18 | 29.37 | 75.4 RBP5_FlexII  | 99.0 KCQITVWEEHLVCVQK        | Label: 13C(6)15N(2)(K)@1; Propionamide(C)@2; Propionamide(C)@15; Label: 13C(6)15N(2)(K)@18                                 | 0.00098227  | 2330.17407 | 583.5508   | 2330.17334 | 583.550598 | 4  | 16      | 15.6624 | 22.16 |
| 27 | 25.18 | 29.37 | 75.4 RBP5_FlexII  | 99.0 KCQITVWEEHLVCVQK        | Label: 13C(6)15N(2)(K)@1; Propionamide(C)@2; Propionamide(C)@15; Label: 13C(6)15N(2)(K)@18                                 | -0.00236571 | 2330.17114 | 777.731    | 2330.17334 | 777.731751 | 3  | 21      | 15.867  | 22.16 |
| 27 | 25.18 | 29.37 | 75.4 RBP5_FlexII  | 99.0 KCQITVWEEHLVCVQK        | Label: 13C(6)15N(2)(K)@1; Propionamide(C)@2; Propionamide(C)@15; Label: 13C(6)15N(2)(K)@18                                 | 0.00173069  | 2330.17505 | 583.551    | 2330.17334 | 583.550598 | 4  | 15      | 15.9239 | 22.16 |
| 27 | 25.18 | 29.37 | 75.4 RBP5_FlexII  | 99.0 KCQITVWEEHLVCVQK        | Label: 13C(6)15N(2)(K)@1; Propionamide(C)@2; Propionamide(C)@15; Label: 13C(6)15N(2)(K)@18                                 | -0.0019995  | 2330.17139 | 777.7311   | 2330.17334 | 777.731751 | 3  | 20      | 16.1355 | 22.16 |
| 27 | 25.18 | 29.37 | 75.4 RBP5_FlexII  | 99.0 KCQITVWEEHLVCVQK        | Label: 13C(6)15N(2)(K)@1; Propionamide(C)@2; Propionamide(C)@15; Label: 13C(6)15N(2)(K)@18                                 | -0.0031521  | 2330.17017 | 583.5498   | 2330.17334 | 583.550598 | 4  | 15      | 16.1884 | 22.16 |
| 27 | 25.18 | 29.37 | 75.4 RBP5_FlexII  | 99.0 KCQITVWEEHLVCVQK        | Label: 13C(6)15N(2)(K)@1; Propionamide(C)@2; Propionamide(C)@15; Label: 13C(6)15N(2)(K)@18                                 | -0.00749265 | 2330.16577 | 777.7292   | 2330.17334 | 777.731751 | 3  | 15      | 16.3968 | 22.16 |
| 27 | 25.18 | 29.37 | 75.4 RBP5_FlexII  | 99.0 KCQITVWEEHLVCVQK        | Label: 13C(6)15N(2)(K)@1; Propionamide(C)@2; Propionamide(C)@15; Label: 13C(6)15N(2)(K)@18                                 | 0.00124241  | 2330.17456 | 583.5509   | 2330.17334 | 583.550598 | 4  | 13      | 16.4522 | 22.16 |
| 27 | 25.18 | 29.37 | 75.4 RBP5_FlexII  | 99.0 KCQITVWEEHLVCVQK        | Label: 13C(6)15N(2)(K)@1; Propionamide(C)@2; Deamidated(Q)@3; Propionamide(C)@15; Label: 13C(6)15N(2)(K)@18                | 0.0285693   | 2331.18604 | 778.0693   | 2331.15747 | 778.059753 | 3  | 13      | 15.0804 | 22.16 |
| 27 | 25.18 | 29.37 | 75.4 RBP5_FlexII  | 99.0 KIALLLKPKDKEIEHOGNHMTVR | Label: 13C(6)15N(2)(K)@1; Label: 13C(6)15N(2)(K)@7; Label: 13C(6)15N(2)(K)@10; Deamidated(Q)@15; Label: 13C(6)15N(4)(R)@23 | 0.0469344   | 2604.49805 | 435.0903   | 2604.45117 | 435.082459 | 6  | 12      | 17.1402 | 22.16 |
| 27 | 25.18 | 29.37 | 75.4 RBP5_FlexII  | 99.0 NMEDYLQALNLSLAVR        | Label: 13C(6)15N(4)(R)@16                                                                                                  | 0.0143612   | 1858.96301 | 930.4888   | 1858.94861 | 930.481628 | 2  | 18      | 17.573  | 22.16 |
| 27 | 25.18 | 29.37 | 75.4 RBP5_FlexII  | 99.0 NMEDYLQALNLSLAVR        | Deamidated(Q)@7; Label: 13C(6)15N(4)(R)@16                                                                                 | 0.0146637   | 1859.94727 | 620.9897   | 1859.93262 | 620.984802 | 3  | 14      | 17.8389 | 22.16 |
| 27 | 25.18 | 29.37 | 75.4 RBP5_FlexII  | 99.0 VRYPTFLYK               | Label: 13C(6)15N(2)(K)@1; Label: 13C(6)15N(2)(K)@9                                                                         | 0.00017995  | 1203.67725 | 602.8459   | 1203.67712 | 602.845825 | 2  | 12      | 14.517  | 22.16 |
| 27 | 25.18 | 29.37 | 75.4 RBP5_FlexII  | 99.0 VRYPTFLYK               | Label: 13C(6)15N(4)(R)@2; Label: 13C(6)15N(2)(K)@9                                                                         | -0.00717102 | 1203.66943 | 402.2304   | 1203.67712 | 402.232971 | 3  | 10      | 15.0035 | 22.16 |
| 27 | 25.18 | 29.37 | 75.4 RBP5_FlexII  | 99.0 YPTFLYK                 | Label: 13C(6)15N(2)(K)@7                                                                                                   | 0.00057017  | 938.499878 | 470.2572   | 938.499329 | 470.256928 | 2  | 9       | 15.0367 | 22.16 |
| 27 | 25.18 | 29.37 | 75.4 RBP5_FlexII  | 99.0 YPTFLYK                 | Label: 13C(6)15N(2)(K)@7                                                                                                   | 0.00819955  | 938.507446 | 470.261    | 938.499329 | 470.256928 | 2  | 9       | 14.7754 | 22.16 |
| 27 | 25.18 | 29.37 | 75.4 RBP5_FlexII  | 99.0 YPTFLYK                 | Label: 13C(6)15N(2)(K)@7                                                                                                   | 0.00073716  | 938.500061 | 470.2573   | 938.499329 | 470.256928 | 2  | 9       | 15.0782 | 22.16 |
| 27 | 25.18 | 29.37 | 75.4 RBP5_FlexII  | 99.0 YPTFLYK                 | Label: 13C(6)15N(2)(K)@7                                                                                                   | 0.00092027  | 938.500244 | 470.2574   | 938.499329 | 470.256928 | 2  | 9       | 14.8156 | 22.16 |
| 28 | 25.1  | 27.19 | 50.3 CIDEB_FlexII | 99.0 FTFDVKYQNP              | Label: 13C(6)15N(2)(K)@7; Label: 13C(6)15N(4)(R)@11                                                                        | -0.00119375 | 1431.72522 | 716.8699   | 1431.72656 | 716.870544 | 2  | 14      | 14.1712 | 5.63  |
| 28 | 25.1  | 27.19 | 50.3 CIDEB_FlexII | 99.0 GLTAATROELLAK           | Label: 13C(6)15N(4)(R)@1; Label: 13C(6)15N(2)(K)@13                                                                        | -0.00407514 | 1388.80664 | 695.4106   | 1388.81067 | 695.412598 | 2  | 17      | 13.903  | 5.63  |
| 28 | 25.1  | 27.19 | 50.3 CIDEB_FlexII | 99.0 GRUHSYPTFLYK            | Label: 13C(6)15N(4)(R)@2; Label: 13C(6)15N(2)(K)@13                                                                        | 0.00107887  | 1661.86963 | 554.9638   | 1661.86853 | 554.96344  | 3  | 16      | 14.4349 | 5.63  |
| 28 | 25.1  | 27.19 | 50.3 CIDEB_FlexII | 99.0 HAVGAEQWQK              | Label: 13C(6)15N(2)(K)@12                                                                                                  | -0.00081298 | 1417.68213 | 709.8483   | 1417.68298 | 709.848755 | 2  | 20      | 11.8386 | 5.63  |
| 28 | 25.1  | 27.19 | 50.3 CIDEB_FlexII | 99.0 KGLTAATROELLAK          | Label: 13C(6)15N(2)(K)@1; Label: 13C(6)15N(4)(R)@8; Label: 13C(6)15N(2)(K)@14                                              | 0.0067395   | 1524.92651 | 763.4705   | 1524.91737 | 763.467163 | 2  | 19      | 12.6089 | 5.63  |
| 28 | 25.1  | 27.19 | 50.3 CIDEB_FlexII | 99.0 LHSYPTFLYK              | -0.016863                                                                                                                  | 1430.70642  | 716.3605   | 1430.72339 | 716.369019 | 2          | 14 | 15.0759 | 5.63    |       |
| 28 | 25.1  | 27.19 | 50.3 CIDEB_FlexII | 99.0 MEYLSALNPDDLRL          | Label: 13C(6)15N(4)(R)@14                                                                                                  | -0.00060146 | 1630.82593 | 816.4202   | 1630.82642 | 816.420471 | 2  | 18      | 16.7321 | 5.63  |
| 28 | 25.1  | 27.19 | 50.3 CIDEB_FlexII | 99.0 SGVLSYGLGR              | Label: 13C(6)15N(4)(R)@10                                                                                                  | -0.00160526 | 1017.54669 | 509.7806   | 1017.54828 | 509.781403 | 2  | 13      | 14.8509 | 5.63  |
| 28 | 25.1  | 27.19 | 50.3 CIDEB_FlexII | 99.0 SVSNISSEFGR             | Label: 13C(6)15N(4)(R)@11                                                                                                  | -0.00067473 | 1191.57532 | 596.7949   | 1191.57593 | 596.795227 | 2  | 13      | 13.7159 | 5.63  |
| 28 | 25.1  | 27.19 | 50.3 CIDEB_FlexII | 99.0 SVSNISSEFGR             | Label: 13C(6)15N(4)(R)@11; Label: 13C(6)15N(4)(R)@12                                                                       | 0.0012509   | 1357.68665 | 679.8506   | 1357.68653 | 679.849915 | 2  | 13      | 13.1371 | 5.63  |
| 28 | 25.1  | 27.19 | 50.3 CIDEB_FlexII | 99.0 VWTSPAPPPRPF            | Label: 13C(6)15N(4)(R)@10; Label: 13C(6)15N(4)(R)@13                                                                       | -0.00536632 | 1557.82642 | 779.9205   | 1557.83191 | 779.923218 | 2  | 12      | 13.4552 | 5.63  |
| 28 | 25.1  | 27.19 | 50.3 CIDEB_FlexII | 99.0 HAVGAEQWQK              | Label: 13C(6)15N(2)(K)@12                                                                                                  | 0.00358155  | 1417.68652 | 709.8505   | 1417.68298 | 709.848755 | 2  | 19      | 12.1056 | 5.63  |
| 28 | 25.1  | 27.19 | 50.3 CIDEB_FlexII | 99.0 HAVGAEQWQK              | Label: 13C(6)15N(2)(K)@12                                                                                                  | 0.00045979  | 1417.68335 | 473.5684   | 1417.68298 | 473.568268 | 3  | 13      | 11.8373 | 5.63  |
| 28 | 25.1  | 27.19 | 50.3 CIDEB_FlexII | 99.0 KGLTAATROELLAK          | Label: 13C(6)15N(2)(K)@1; Label: 13C(6)15N(4)(R)@8; Label: 13C(6)15N(2)(K)@14                                              | -0.00981    | 1524.91003 | 509.3106   | 1524.9198  | 509.313873 | 3  | 13      | 12.5461 | 5.63  |
| 28 | 25.1  | 27.19 | 50.3 CIDEB_FlexII | 99.0 LHSYPTFLYK              | Label: 13C(6)15N(2)(K)@11                                                                                                  | -0.00066759 | 1438.73682 | 720.3757   | 1438.73767 | 720.376099 | 2  | 14      | 15.0679 | 5.63  |
| 28 | 25.1  | 27.19 | 50.3 CIDEB_FlexII | 99.0 LHSYPTFLYK              | Label: 13C(6)15N(2)(K)@11                                                                                                  | -0.00078966 | 1438.73682 | 720.3757   | 1438.73767 | 720.376099 | 2  | 13      | 15.349  | 5.63  |
| 28 | 25.1  | 27.19 | 50.3 CIDEB_FlexII | 99.0 LHSYPTFLYK              | Label: 13C(6)15N(2)(K)@11                                                                                                  | -0.0110436  | 1438.72644 | 720.3705   | 1438.73767 | 720.376099 | 2  | 10      | 24.5049 | 5.63  |
| 28 | 25.1  | 27.19 | 50.3 CIDEB_FlexII | 99.0 MEYLSALNPDDLRL          | Label: 13C(6)15N(4)(R)@14                                                                                                  | -0.00157802 | 1630.82483 | 816.4197   | 1630.82642 | 816.420471 | 2  | 16      | 16.9931 | 5.63  |
| 28 | 25.1  | 27.19 | 50.3 CIDEB_FlexII | 99.0 SGVLSYGLGR              | Label: 13C(6)15N(4)(R)@10                                                                                                  | -1.83E-05   | 1017.54828 | 509.7814   | 1017.54828 | 509.781403 | 2  | 13      | 14.2883 | 5.63  |
| 28 | 25.1  | 27.19 | 50.3 CIDEB_FlexII | 99.0 SGVLSYGLGR              | Label: 13C(6)15N(4)(R)@10                                                                                                  | 0.0004089   | 1017.54865 | 509.7816   | 1017.54828 | 509.781403 | 2  | 13      | 14.5586 | 5.63  |
| 28 | 25.1  | 27.19 | 50.3 CIDEB_FlexII | 99.0 SGVLSYGLGR              | Label: 13C(6)15N(4)(R)@10                                                                                                  | -0.00117801 | 1017.54706 | 509.7808   | 1017.54828 | 509.78     |    |         |         |       |

|    |       |       |                    |                                         |                                                                                                            |                                 |             |            |          |            |            |   |    |         |       |
|----|-------|-------|--------------------|-----------------------------------------|------------------------------------------------------------------------------------------------------------|---------------------------------|-------------|------------|----------|------------|------------|---|----|---------|-------|
| 31 | 24.39 | 28.22 | 36.2 ARPC5_FlexIII | 99.0 KTVYPTFLYK                         | Label: 13C(6)15N(2)(K) @ 1; Label: 13C(6)15N(2)(K) @ 10                                                    | missed K-T @ 1                  | -0.00123617 | 1274.72351 | 638.369  | 1274.72461 | 638.369568 | 2 | 16 | 14.791  | 36.87 |
| 31 | 24.39 | 28.22 | 36.2 ARPC5_FlexIII | 99.0 KVDVDEYDENK                        | Label: 13C(6)15N(2)(K) @ 1; Label: 13C(6)15N(2)(K) @ 11                                                    | missed K-V @ 1                  | 0.00121898  | 1368.63904 | 457.2203 | 1368.63794 | 457.21994  | 3 | 11 | 11.9785 | 36.87 |
| 31 | 24.39 | 28.22 | 36.2 ARPC5_FlexIII | 99.0 KVDVDEYDENKFVDEEDGGDGAQGPDGEVDSCLR | Label: 13C(6)15N(2)(K) @ 1; Label: 13C(6)15N(2)(K) @ 11; Propionamide(C) @ 33; Label: 13C(6)15N(4)(R) @ 35 | missed K-V @ 1; missed K-F @ 11 | 0.0128634   | 3926.68848 | 982.6794 | 3926.67578 | 982.67627  | 4 | 10 | 24.6834 | 36.87 |
| 31 | 24.39 | 28.22 | 36.2 ARPC5_FlexIII | 99.0 NPPINTK                            | Label: 13C(6)15N(2)(K) @ 7                                                                                 |                                 | 0.00027486  | 790.443298 | 396.2289 | 790.442871 | 396.228699 | 2 | 8  | 10.6355 | 36.87 |
| 31 | 24.39 | 28.22 | 36.2 ARPC5_FlexIII | 99.0 VDVDEYDENKFVDEEDGGDGAQPDGEVDSCLR   | Label: 13C(6)15N(2)(K) @ 10; Propionamide(C) @ 32; Label: 13C(6)15N(4)(R) @ 34                             | missed K-F @ 10                 | -0.00146071 | 3790.56543 | 1264.529 | 3790.56665 | 1264.52954 | 3 | 19 | 14.7897 | 36.87 |
| 31 | 24.39 | 28.22 | 36.2 ARPC5_FlexIII | 99.0 VLUISFKANDIEK                      | Label: 13C(6)15N(2)(K) @ 6; Label: 13C(6)15N(2)(K) @ 12                                                    | missed K-A @ 6                  | -0.00034256 | 1391.79907 | 464.9403 | 1391.79965 | 464.94046  | 3 | 10 | 14.5343 | 36.87 |
| 31 | 24.39 | 28.22 | 36.2 ARPC5_FlexIII | 99.0 YIYKGFESPDSNSSAMLLQWHEK            | Label: 13C(6)15N(2)(K) @ 4; Label: 13C(6)15N(2)(K) @ 23                                                    | missed K-G @ 4                  | -0.0171511  | 2745.29102 | 687.33   | 2745.30786 | 687.33429  | 4 | 13 | 16.3882 | 36.87 |
| 31 | 24.39 | 28.22 | 36.2 ARPC5_FlexIII | 99.0 TVYPTFLYK                          | Label: 13C(6)15N(2)(K) @ 9                                                                                 |                                 | -0.00964429 | 1138.60584 | 570.3102 | 1138.61536 | 570.315002 | 2 | 9  | 15.4962 | 36.87 |
| 31 | 24.39 | 28.22 | 36.2 ARPC5_FlexIII | 99.0 ALAAGVGVSIVR                       | Label: 13C(6)15N(4)(R) @ 12                                                                                |                                 | -0.0129601  | 1079.61963 | 360.8805 | 1079.63269 | 360.884827 | 3 | 10 | 12.5971 | 36.87 |
| 31 | 24.39 | 28.22 | 36.2 ARPC5_FlexIII | 99.0 ALAAGVGVSIVR                       | Label: 13C(6)15N(4)(R) @ 12                                                                                |                                 | 0.00114348  | 1079.63391 | 540.8242 | 1079.63269 | 540.823608 | 2 | 12 | 14.0775 | 36.87 |
| 31 | 24.39 | 28.22 | 36.2 ARPC5_FlexIII | 99.0 ALAAGVGVSIVR                       | Label: 13C(6)15N(4)(R) @ 12                                                                                |                                 | -0.0129601  | 1079.61963 | 360.8805 | 1079.63269 | 360.884827 | 3 | 11 | 14.2398 | 36.87 |
| 31 | 24.39 | 28.22 | 36.2 ARPC5_FlexIII | 99.0 ALAAGVGVSIVR                       | Label: 13C(6)15N(4)(R) @ 12                                                                                |                                 | 0.00041106  | 1079.63306 | 540.8238 | 1079.63269 | 540.823608 | 2 | 13 | 14.3498 | 36.87 |
| 31 | 24.39 | 28.22 | 36.2 ARPC5_FlexIII | 99.0 ALAAGVGVSIVR                       | Label: 13C(6)15N(4)(R) @ 12                                                                                |                                 | -0.00679108 | 1079.62585 | 540.8202 | 1079.63269 | 540.823608 | 2 | 12 | 14.6444 | 36.87 |
| 31 | 24.39 | 28.22 | 36.2 ARPC5_FlexIII | 99.0 ALAAGVGVSIVR                       | Label: 13C(6)15N(4)(R) @ 12                                                                                |                                 | 0.0006552   | 1079.6333  | 540.8239 | 1079.63269 | 540.823608 | 2 | 11 | 15.0619 | 36.87 |
| 31 | 24.39 | 28.22 | 36.2 ARPC5_FlexIII | 99.0 ALAAGVGVSIVR                       | Label: 13C(6)15N(4)(R) @ 12                                                                                |                                 | -0.00105379 | 1079.63171 | 540.8231 | 1079.63269 | 540.823608 | 2 | 11 | 17.3965 | 36.87 |
| 31 | 24.39 | 28.22 | 36.2 ARPC5_FlexIII | 99.0 ALAAGVGVSIVR                       | Label: 13C(6)15N(4)(R) @ 12                                                                                |                                 | 0.00114348  | 1079.63391 | 540.8242 | 1079.63269 | 540.823608 | 2 | 11 | 17.6599 | 36.87 |
| 31 | 24.39 | 28.22 | 36.2 ARPC5_FlexIII | 99.0 ALAAGVGVSIVR                       | Label: 13C(6)15N(4)(R) @ 12                                                                                |                                 | 0.00199797  | 1079.63464 | 540.8246 | 1079.63269 | 540.823608 | 2 | 10 | 17.9373 | 36.87 |
| 31 | 24.39 | 28.22 | 36.2 ARPC5_FlexIII | 99.0 ALAAGVGVSIVR                       | Label: 13C(6)15N(4)(R) @ 12                                                                                |                                 | -0.00679108 | 1079.62585 | 540.8202 | 1079.63269 | 540.823608 | 2 | 10 | 18.192  | 36.87 |
| 31 | 24.39 | 28.22 | 36.2 ARPC5_FlexIII | 99.0 ALAAGVGVSIVR                       | Label: 13C(6)15N(4)(R) @ 12                                                                                |                                 | -0.00056551 | 1079.63208 | 540.8233 | 1079.63269 | 540.823608 | 2 | 9  | 18.521  | 36.87 |
| 31 | 24.39 | 28.22 | 36.2 ARPC5_FlexIII | 99.0 ALAAGVGVSIVR                       | Label: 13C(6)15N(4)(R) @ 12                                                                                |                                 | -0.00679108 | 1079.62585 | 540.8202 | 1079.63269 | 540.823608 | 2 | 8  | 24.7113 | 36.87 |
| 31 | 24.39 | 28.22 | 36.2 ARPC5_FlexIII | 99.0 ALAAGVGVSIVR                       | Label: 13C(6)15N(4)(R) @ 12                                                                                |                                 | -0.0105379  | 1079.63171 | 540.8231 | 1079.63269 | 540.823608 | 2 | 9  | 24.9714 | 36.87 |
| 31 | 24.39 | 28.22 | 36.2 ARPC5_FlexIII | 99.0 ALAAGVGVSIVR                       | Label: 13C(6)15N(4)(R) @ 12                                                                                |                                 | -0.00679108 | 1079.62585 | 540.8202 | 1079.63269 | 540.823608 | 2 | 9  | 25.2263 | 36.87 |
| 31 | 24.39 | 28.22 | 36.2 ARPC5_FlexIII | 99.0 ALAAGVGVSIVR                       | Label: 13C(6)15N(4)(R) @ 12                                                                                |                                 | -0.00679108 | 1079.62585 | 540.8202 | 1079.63269 | 540.823608 | 2 | 8  | 26.1518 | 36.87 |
| 31 | 24.39 | 28.22 | 36.2 ARPC5_FlexIII | 99.0 ALAAGVGVSIVR                       | Label: 13C(6)15N(4)(R) @ 12                                                                                |                                 | -0.00679108 | 1079.62585 | 540.8202 | 1079.63269 | 540.823608 | 2 | 8  | 24.4399 | 36.87 |
| 31 | 24.39 | 28.22 | 36.2 ARPC5_FlexIII | 99.0 ALAAGVGVSIVR                       | Label: 13C(6)15N(4)(R) @ 12                                                                                |                                 | 0.00114348  | 1079.63391 | 540.8242 | 1079.63269 | 540.823608 | 2 | 7  | 25.4874 | 36.87 |
| 31 | 24.39 | 28.22 | 36.2 ARPC5_FlexIII | 99.0 AVQSLDKNGVDLLMK                    | Label: 13C(6)15N(2)(K) @ 7; Label: 13C(6)15N(2)(K) @ 15                                                    | missed K-N @ 7                  | 0.0006187   | 1645.90503 | 549.6423 | 1645.90442 | 549.64209  | 3 | 14 | 14.813  | 36.87 |
| 31 | 24.39 | 28.22 | 36.2 ARPC5_FlexIII | 99.0 AVQSLDKNGVDLLMK                    | Label: 13C(6)15N(2)(K) @ 7; Deamidated(N) @ 8; Label: 13C(6)15N(2)(K) @ 15                                 | missed K-N @ 7                  | 6.09E-05    | 1646.88843 | 549.9701 | 1646.88843 | 549.970093 | 3 | 13 | 15.0923 | 36.87 |
| 31 | 24.39 | 28.22 | 36.2 ARPC5_FlexIII | 99.0 AVQSLDKNGVDLLMK                    | Label: 13C(6)15N(2)(K) @ 7; Deamidated(N) @ 8; Label: 13C(6)15N(2)(K) @ 15                                 | missed K-N @ 7                  | 0.00153023  | 1646.89002 | 824.4523 | 1646.88843 | 824.451477 | 2 | 22 | 15.0946 | 36.87 |
| 31 | 24.39 | 28.22 | 36.2 ARPC5_FlexIII | 99.0 AVQSLDKNGVDLLMK                    | Label: 13C(6)15N(2)(K) @ 7; Label: 13C(6)15N(2)(K) @ 15                                                    | missed K-N @ 7                  | -0.00018567 | 1645.9043  | 823.9594 | 1645.90442 | 823.959473 | 2 | 20 | 14.7074 | 36.87 |
| 31 | 24.39 | 28.22 | 36.2 ARPC5_FlexIII | 99.0 AVQSLDKNGVDLLMK                    | Label: 13C(6)15N(2)(K) @ 7; Label: 13C(6)15N(2)(K) @ 15                                                    | missed K-N @ 7                  | -0.00760084 | 1645.89673 | 549.6395 | 1645.90442 | 549.64209  | 3 | 14 | 14.7293 | 36.87 |
| 31 | 24.39 | 28.22 | 36.2 ARPC5_FlexIII | 99.0 HSITGNMTAALQAALK                   | Label: 13C(6)15N(2)(K) @ 16                                                                                |                                 | 0.0148284   | 1633.88513 | 817.9498 | 1633.87012 | 817.942322 | 2 | 21 | 16.114  | 36.87 |
| 31 | 24.39 | 28.22 | 36.2 ARPC5_FlexIII | 99.0 HSITGNMTAALQAALK                   | Label: 13C(6)15N(2)(K) @ 16                                                                                |                                 | -0.00135036 | 1633.86877 | 545.6302 | 1633.87012 | 545.630676 | 3 | 18 | 16.1362 | 36.87 |
| 31 | 24.39 | 28.22 | 36.2 ARPC5_FlexIII | 99.0 HSITGNMTAALQAALK                   | Label: 13C(6)15N(2)(K) @ 16                                                                                |                                 | -0.00165109 | 1633.86853 | 817.9415 | 1633.87012 | 817.942322 | 2 | 27 | 16.3777 | 36.87 |
| 31 | 24.39 | 28.22 | 36.2 ARPC5_FlexIII | 99.0 HSITGNMTAALQAALK                   | Label: 13C(6)15N(2)(K) @ 16                                                                                |                                 | 0.00139622  | 1633.87146 | 545.6311 | 1633.87012 | 545.630676 | 3 | 19 | 16.4037 | 36.87 |
| 31 | 24.39 | 28.22 | 36.2 ARPC5_FlexIII | 99.0 HSITGNMTAALQAALK                   | Label: 13C(6)15N(2)(K) @ 16                                                                                |                                 | -0.00135036 | 1633.86877 | 545.6302 | 1633.87012 | 545.630676 | 3 | 19 | 16.6606 | 36.87 |
| 31 | 24.39 | 28.22 | 36.2 ARPC5_FlexIII | 99.0 HSITGNMTAALQAALK                   | Label: 13C(6)15N(2)(K) @ 16                                                                                |                                 | 0.00457449  | 1633.87463 | 817.9446 | 1633.87012 | 817.942322 | 2 | 23 | 16.907  | 36.87 |
| 31 | 24.39 | 28.22 | 36.2 ARPC5_FlexIII | 99.0 HSITGNMTAALQAALK                   | Deamidated(N) @ 6; Label: 13C(6)15N(2)(K) @ 16                                                             |                                 | 0.0345298   | 1634.88879 | 545.9702 | 1634.85413 | 545.958679 | 3 | 10 | 17.3716 | 36.87 |
| 31 | 24.39 | 28.22 | 36.2 ARPC5_FlexIII | 99.0 HSITGNMTAALQAALK                   | Label: 13C(6)15N(2)(K) @ 16                                                                                |                                 | -0.00094678 | 1633.86926 | 817.9419 | 1633.87012 | 817.942322 | 2 | 26 | 15.7427 | 36.87 |
| 31 | 24.39 | 28.22 | 36.2 ARPC5_FlexIII | 99.0 HSITGNMTAALQAALK                   | Label: 13C(6)15N(2)(K) @ 16                                                                                |                                 | -0.0009767  | 1633.86914 | 545.6303 | 1633.87012 | 545.630676 | 3 | 19 | 15.7614 | 36.87 |
| 31 | 24.39 | 28.22 | 36.2 ARPC5_FlexIII | 99.0 HSITGNMTAALQAALK                   | Label: 13C(6)15N(2)(K) @ 16                                                                                |                                 | 0.00381396  | 1633.87402 | 817.9443 | 1633.87012 | 817.942322 | 2 | 26 | 16.0133 | 36.87 |
| 31 | 24.39 | 28.22 | 36.2 ARPC5_FlexIII | 99.0 HSITGNMTAALQAALK                   | Label: 13C(6)15N(2)(K) @ 16                                                                                |                                 | -0.00061049 | 1633.86926 | 545.6304 | 1633.87012 | 545.630676 | 3 | 19 | 16.0395 | 36.87 |
| 31 | 24.39 | 28.22 | 36.2 ARPC5_FlexIII | 99.0 HSITGNMTAALQAALK                   | Label: 13C(6)15N(2)(K) @ 16                                                                                |                                 | -0.00595166 | 1633.86426 | 817.9394 | 1633.87012 | 817.942322 | 2 | 24 | 16.2767 | 36.87 |
| 31 | 24.39 | 28.22 | 36.2 ARPC5_FlexIII | 99.0 HSITGNMTAALQAALK                   | Label: 13C(6)15N(2)(K) @ 16                                                                                |                                 | 0.00378404  | 1633.8739  | 545.6319 | 1633.87012 | 545.630676 | 3 | 18 | 16.3562 | 36.87 |
| 31 | 24.39 | 28.22 | 36.2 ARPC5_FlexIII | 99.0 HSITGNMTAALQAALKNPPINTK            | Label: 13C(6)15N(2)(K) @ 16; Label: 13C(6)15N(2)(K) @ 23                                                   | missed K-N @ 16                 | 0.00501159  | 2406.30713 | 803.1097 | 2406.30249 | 803.108093 | 3 | 17 | 16.2728 | 36.87 |
| 31 | 24.39 | 28.22 | 36.2 ARPC5_FlexIII | 99.0 HSITGNMTAALQAALKNPPINTK            | Label: 13C(6)15N(2)(K) @ 16; Label: 13C(6)15N(2)(K) @ 23                                                   | missed K-N @ 16                 | -0.0110451  | 2406.29126 | 602.5801 | 2406.30249 | 602.582886 | 4 | 20 | 16.4625 | 36.87 |
| 31 | 24.39 | 28.22 | 36.2 ARPC5_FlexIII | 99.0 HSITGNMTAALQAALKNPPINTK            | Deamidated(Q) @ 12; Label: 13C(6)15N(2)(K) @ 16; Label: 13C(6)15N(2)(K) @ 23                               | missed K-N @ 16                 | 0.0110456   | 2407.29761 | 803.4398 | 2407.28638 | 803.436096 | 3 | 20 | 16.528  | 36.87 |
| 31 | 24.39 | 28.22 | 36.2 ARPC5_FlexIII | 99.0 HSITGNMTAALQAALKNPPINTK            | Deamidated(Q) @ 12; Label: 13C(6)15N(2)(K) @ 16; Label: 13C(6)15N(2)(K) @ 23                               | missed K-N @ 16                 | 0.0172756   | 2407.30347 | 1204.659 | 2407.28638 | 1204.65051 | 2 | 19 | 16.6629 | 36.87 |
| 31 | 24.39 | 28.22 | 36.2 ARPC5_FlexIII | 99.0 HSITGNMTAALQAALKNPPINTK            | Label: 13C(6)15N(2)(K) @ 16; Label: 13C(6)15N(2)(K) @ 23                                                   | missed K-N @ 16                 | -0.0110451  | 2406.29126 | 602.5801 | 2406.30249 | 602.582886 | 4 | 20 | 16.7459 | 36.87 |
| 31 | 24.39 | 28.22 | 36.2 ARPC5_FlexIII | 99.0 HSITGNMTAALQAALKNPPINTK            | Label: 13C(6)15N(2)(K) @ 16; Label: 13C(6)15N(2)(K) @ 23                                                   | missed K-N @ 16                 | -0.0017633  | 2406.30054 | 803.1075 | 2406.30249 | 803.108093 | 3 | 24 | 16.801  | 36.87 |
| 31 | 24.39 | 28.22 | 36.2 ARPC5_FlexIII | 99.0 HSITGNMTAALQAALKNPPINTK            | Label: 13C(6)15N(2)(K) @ 16; Label: 13C(6)15N(2)(K) @ 23                                                   | missed K-N @ 16                 | 0.0012929   | 2406.30347 | 1204.159 | 2406.30249 | 1204.15845 | 2 | 28 | 16.9376 | 36.87 |
| 31 | 24.39 | 28.22 | 36.2 ARPC5_FlexIII | 99.0 HSITGNMTAALQAALKNPPINTK            | Label: 13C(6)15N(2)(K) @ 16; Label: 13C(6)15N(2)(K) @ 23                                                   | missed K-N @ 16                 | 0.00226501  | 2406.30469 | 803.1088 | 2406.30249 | 803.108093 | 3 | 25 | 17.0668 | 36.87 |
| 31 | 24.39 | 28.22 | 36.2 ARPC5_FlexIII | 99.0 HSITGNMTAALQAALKNPPINTK            | Label: 13C(6)15N(2)(K) @ 16; Label: 13C(6)15N(2)(K) @ 23                                                   | missed K-N @ 16                 | 0.0021385   | 2406.30444 | 602.5834 | 2406.30249 | 602.582886 | 4 | 17 | 17.2702 | 36.87 |
| 31 | 24.39 | 28.22 | 36.2 ARPC5_FlexIII | 99.0 HSITGNMTAALQAALKNPPINTK            | Deamidated(Q) @ 12; Label: 13C(6)15N(2)(K) @ 16; Label: 13C(6)15N(2)(K) @ 23                               | missed K-N @ 16                 | 0.0110456   | 2407.29761 | 803.4398 | 2407.28638 | 803.436096 | 3 | 17 | 17.3426 | 36.87 |
| 31 | 24.39 | 28.22 | 36.2 ARPC5_FlexIII | 99.0 HSITGNMTAALQAALKNPPINTK            | Label: 13C(6)15N(2)(K) @ 16; Label: 13C(6)15N(2)(K) @ 23                                                   | missed K-N @ 16                 | -0.0110451  | 2406.29126 | 602.5801 | 2406.30249 | 602.582886 | 4 | 16 | 17.5737 | 36.87 |
| 31 | 24.39 | 28.22 | 36.2 ARPC5_FlexIII | 99.0 HSITGNMTAALQAALKNPPINTK            | Label: 13C(6)15N(2)(K) @ 16; Label: 13C(6)15N(2)(K) @ 23                                                   | missed K-N @ 16                 | 0.00409162  | 2406.30664 | 602.5839 | 2406.30249 | 602.582886 | 4 | 13 | 24.503  | 36.87 |
| 31 | 24.39 | 28.22 | 36.2 ARPC5_FlexIII | 99.0 HSITGNMTAALQAALKNPPINTK            | Label: 13C(6)15N(2)(K) @ 16; Label: 13C(6)15N(2)(K) @ 23                                                   | missed K-N @ 16                 | -0.0110451  | 2406.29126 | 602.5801 | 2406.30249 | 602.582886 | 4 | 8  | 25.0666 | 36.87 |
| 31 | 24.39 | 28.22 | 36.2 ARPC5_FlexIII | 99.0 HSITGNMTAALQAALKNPPINTK            | Label: 13C(6)15N(2)(K) @ 16; Label: 13C(6)15N(2)(K) @ 23                                                   | missed K-N @ 16                 | 0.00382363  | 2406.3064  | 803.1094 | 2406.30249 | 803.108093 | 3 | 26 | 15.7152 | 36.87 |
| 31 | 24.39 | 28.22 | 36.2 ARPC          |                                         |                                                                                                            |                                 |             |            |          |            |            |   |    |         |       |

|    |       |       |                    |                                          |                                                                                                                                |                                 |             |            |            |             |            |    |         |         |       |
|----|-------|-------|--------------------|------------------------------------------|--------------------------------------------------------------------------------------------------------------------------------|---------------------------------|-------------|------------|------------|-------------|------------|----|---------|---------|-------|
| 31 | 24.39 | 28.22 | 36.2 ARPC5_FlexIII | 99.0 HSITGNMTAALQALKNPPIINTK             | Deamidated(Q) @ 12; Label: 13C(6)15N(2)(K) @ 16; Label: 13C(6)15N(2)(K) @ 23                                                   | missed K-N @ 16                 | 0.00985871  | 2407.29639 | 803.4394   | 2407.28638  | 803.436096 | 3  | 14      | 17.3507 | 36.87 |
| 31 | 24.39 | 28.22 | 36.2 ARPC5_FlexIII | 99.0 HSITGNMTAALQALKNPPIINTK             | Label: 13C(6)15N(2)(K) @ 16; Label: 13C(6)15N(2)(K) @ 23                                                                       | missed K-N @ 16                 | -0.00444603 | 2406.2981  | 602.5818   | 2406.30249  | 602.582896 | 4  | 17      | 24.4972 | 36.87 |
| 31 | 24.39 | 28.22 | 36.2 ARPC5_FlexIII | 99.0 HSITGNMTAALQALKNPPIINTK             | Label: 13C(6)15N(2)(K) @ 16; Label: 13C(6)15N(2)(K) @ 23                                                                       | missed K-N @ 16                 | 0.00382363  | 2406.3064  | 803.1094   | 2406.30249  | 803.108093 | 3  | 15      | 24.5062 | 36.87 |
| 31 | 24.39 | 28.22 | 36.2 ARPC5_FlexIII | 99.0 HSITGNMTAALQALKNPPIINTK             | Deamidated(Q) @ 12; Label: 13C(6)15N(2)(K) @ 16; Label: 13C(6)15N(2)(K) @ 23                                                   | missed K-N @ 16                 | 0.00250458  | 2407.28906 | 602.8295   | 2407.28638  | 602.828857 | 4  | 15      | 24.7528 | 36.87 |
| 31 | 24.39 | 28.22 | 36.2 ARPC5_FlexIII | 99.0 HSITGNMTAALQALKNPPIINTK             | Label: 13C(6)15N(2)(K) @ 16; Label: 13C(6)15N(2)(K) @ 23                                                                       | missed K-N @ 16                 | -0.011142   | 2406.29126 | 602.5801   | 2406.30249  | 602.582886 | 4  | 11      | 24.5194 | 36.87 |
| 31 | 24.39 | 28.22 | 36.2 ARPC5_FlexIII | 99.0 KTVYPTFLYK                          | Label: 13C(6)15N(2)(K) @ 1; Label: 13C(6)15N(2)(K) @ 10                                                                        | missed K-T @ 1                  | 0.00037681  | 1274.72498 | 425.9156   | 1274.72461  | 425.915466 | 3  | 10      | 14.6067 | 36.87 |
| 31 | 24.39 | 28.22 | 36.2 ARPC5_FlexIII | 99.0 KTVYPTFLYK                          | Label: 13C(6)15N(2)(K) @ 1; Label: 13C(6)15N(2)(K) @ 10                                                                        | missed K-T @ 1                  | 0.00037681  | 1274.72498 | 425.9156   | 1274.72461  | 425.915466 | 3  | 10      | 14.965  | 36.87 |
| 31 | 24.39 | 28.22 | 36.2 ARPC5_FlexIII | 99.0 KTVYPTFLYK                          | Label: 13C(6)15N(2)(K) @ 1; Label: 13C(6)15N(2)(K) @ 10                                                                        | missed K-T @ 1                  | -0.010013   | 1274.71448 | 425.9121   | 1274.72461  | 425.915466 | 3  | 11      | 14.7866 | 36.87 |
| 31 | 24.39 | 28.22 | 36.2 ARPC5_FlexIII | 99.0 KTVYPTFLYK                          | Label: 13C(6)15N(2)(K) @ 1; Label: 13C(6)15N(2)(K) @ 10                                                                        | missed K-T @ 1                  | -0.0013697  | 1274.72315 | 425.915    | 1274.72461  | 425.915466 | 3  | 10      | 14.5637 | 36.87 |
| 31 | 24.39 | 28.22 | 36.2 ARPC5_FlexIII | 99.0 KTVYPTFLYK                          | Label: 13C(6)15N(2)(K) @ 1; Label: 13C(6)15N(2)(K) @ 10                                                                        | missed K-T @ 1                  | -0.0151871  | 1274.70935 | 425.9104   | 1274.72461  | 425.915466 | 3  | 9       | 15.2226 | 36.87 |
| 31 | 24.39 | 28.22 | 36.2 ARPC5_FlexIII | 99.0 KTVYPTFLYK                          | Label: 13C(6)15N(2)(K) @ 1; Label: 13C(6)15N(2)(K) @ 10                                                                        | missed K-T @ 1                  | -0.00882285 | 1274.7157  | 425.9125   | 1274.72461  | 425.915466 | 3  | 10      | 14.5238 | 36.87 |
| 31 | 24.39 | 28.22 | 36.2 ARPC5_FlexIII | 99.0 KVDVDEYDENKFDVEEDGGDGAQGPDEGEVDSCLR | Label: 13C(6)15N(2)(K) @ 1; Label: 13C(6)15N(2)(K) @ 11; Deamidated(Q) @ 22; Propionamide(C) @ 33; Label: 13C(6)15N(4)(R) @ 35 | missed K-V @ 1; missed K-F @ 11 | 0.0288461   | 3927.68848 | 982.9294   | 3927.65991  | 982.922241 | 4  | 24      | 14.351  | 36.87 |
| 31 | 24.39 | 28.22 | 36.2 ARPC5_FlexIII | 99.0 KVDVDEYDENKFDVEEDGGDGAQGPDEGEVDSCLR | Label: 13C(6)15N(2)(K) @ 1; Deamidated(N) @ 10; Label: 13C(6)15N(2)(K) @ 11; Propionamide(C) @ 33; Label: 13C(6)15N(4)(R) @ 35 | missed K-V @ 1; missed K-F @ 11 | 0.00498586  | 3927.66528 | 1310.229   | 3927.65991  | 1310.2273  | 3  | 27      | 14.374  | 36.87 |
| 31 | 24.39 | 28.22 | 36.2 ARPC5_FlexIII | 99.0 KVDVDEYDENKFDVEEDGGDGAQGPDEGEVDSCLR | Label: 13C(6)15N(2)(K) @ 1; Label: 13C(6)15N(2)(K) @ 11; Deamidated(Q) @ 22; Propionamide(C) @ 33; Label: 13C(6)15N(4)(R) @ 35 | missed K-V @ 1; missed K-F @ 11 | 0.0288461   | 3927.68848 | 982.9294   | 3927.65991  | 982.922241 | 4  | 23      | 14.616  | 36.87 |
| 31 | 24.39 | 28.22 | 36.2 ARPC5_FlexIII | 99.0 KVDVDEYDENKFDVEEDGGDGAQGPDEGEVDSCLR | Label: 13C(6)15N(2)(K) @ 1; Label: 13C(6)15N(2)(K) @ 11; Deamidated(Q) @ 22; Propionamide(C) @ 33; Label: 13C(6)15N(4)(R) @ 35 | missed K-V @ 1; missed K-F @ 11 | 0.0288461   | 3927.68848 | 982.9294   | 3927.65991  | 982.922241 | 4  | 20      | 15.2487 | 36.87 |
| 31 | 24.39 | 28.22 | 36.2 ARPC5_FlexIII | 99.0 KVDVDEYDENKFDVEEDGGDGAQGPDEGEVDSCLR | Label: 13C(6)15N(2)(K) @ 1; Deamidated(N) @ 10; Label: 13C(6)15N(2)(K) @ 11; Propionamide(C) @ 33; Label: 13C(6)15N(4)(R) @ 35 | missed K-V @ 1; missed K-F @ 11 | 0.0288461   | 3927.68848 | 982.9294   | 3927.65991  | 982.922241 | 4  | 17      | 17.3988 | 36.87 |
| 31 | 24.39 | 28.22 | 36.2 ARPC5_FlexIII | 99.0 KVDVDEYDENKFDVEEDGGDGAQGPDEGEVDSCLR | Label: 13C(6)15N(2)(K) @ 1; Label: 13C(6)15N(2)(K) @ 11; Propionamide(C) @ 33; Label: 13C(6)15N(4)(R) @ 35                     | missed K-V @ 1; missed K-F @ 11 | 0.0128634   | 3926.68848 | 982.6794   | 3926.67578  | 982.67627  | 4  | 11      | 24.9937 | 36.87 |
| 31 | 24.39 | 28.22 | 36.2 ARPC5_FlexIII | 99.0 KVDVDEYDENKFDVEEDGGDGAQGPDEGEVDSCLR | Label: 13C(6)15N(2)(K) @ 1; Label: 13C(6)15N(2)(K) @ 11; Propionamide(C) @ 33; Label: 13C(6)15N(4)(R) @ 35                     | missed K-V @ 1; missed K-F @ 11 | 0.0128634   | 3926.68848 | 982.6794   | 3926.67578  | 982.67627  | 4  | 10      | 25.3595 | 36.87 |
| 31 | 24.39 | 28.22 | 36.2 ARPC5_FlexIII | 99.0 KVDVDEYDENKFDVEEDGGDGAQGPDEGEVDSCLR | Label: 13C(6)15N(2)(K) @ 1; Deamidated(N) @ 10; Label: 13C(6)15N(2)(K) @ 11; Propionamide(C) @ 33; Label: 13C(6)15N(4)(R) @ 35 | missed K-V @ 1; missed K-F @ 11 | 0.0288461   | 3927.68848 | 982.9294   | 3927.65991  | 982.922241 | 4  | 9       | 25.6172 | 36.87 |
| 31 | 24.39 | 28.22 | 36.2 ARPC5_FlexIII | 99.0 TVYPTFLYK                           | Label: 13C(6)15N(2)(K) @ 9                                                                                                     | 0.00256272                      | 1138.61804  | 570.3163   | 1138.61536 | 570.315002  | 2          | 9  | 16.044  | 36.87   |       |
| 31 | 24.39 | 28.22 | 36.2 ARPC5_FlexIII | 99.0 VDDVDEYDENKFDVEEDGGDGAQGPDEGEVDSCLR | Label: 13C(6)15N(2)(K) @ 10; Deamidated(Q) @ 21; Propionamide(C) @ 32; Label: 13C(6)15N(4)(R) @ 34                             | missed K-F @ 10                 | 0.0183628   | 3791.56885 | 948.8995   | 3791.55078  | 948.894959 | 4  | 24      | 14.502  | 36.87 |
| 31 | 24.39 | 28.22 | 36.2 ARPC5_FlexIII | 99.0 YIYKGFESPDSNSSAMLLQWHEK             | Label: 13C(6)15N(2)(K) @ 4; Deamidated(N) @ 12; Label: 13C(6)15N(2)(K) @ 23                                                    | missed K-G @ 4                  | -0.00116839 | 2746.29102 | 887.58     | 2746.29199  | 887.580261 | 4  | 11      | 16.1596 | 36.87 |
| 31 | 24.39 | 28.22 | 36.2 ARPC5_FlexIII | 99.0 YPTFLYK                             | Label: 13C(6)15N(2)(K) @ 7                                                                                                     | cleaved V-Y @ N-term            | 0.00057017  | 938.499878 | 470.2572   | 938.499329  | 470.256928 | 2  | 9       | 15.0367 | 36.87 |
| 31 | 24.39 | 28.22 | 36.2 ARPC5_FlexIII | 99.0 YPTFLYK                             | Label: 13C(6)15N(2)(K) @ 7                                                                                                     | cleaved V-Y @ N-term            | 0.00819955  | 938.507446 | 470.261    | 938.499329  | 470.256928 | 2  | 9       | 14.7754 | 36.87 |
| 31 | 24.39 | 28.22 | 36.2 ARPC5_FlexIII | 99.0 YPTFLYK                             | Label: 13C(6)15N(2)(K) @ 7                                                                                                     | cleaved V-Y @ N-term            | 0.00073716  | 938.500061 | 470.2573   | 938.499329  | 470.256928 | 2  | 9       | 15.0782 | 36.87 |
| 31 | 24.39 | 28.22 | 36.2 ARPC5_FlexIII | 99.0 YPTFLYK                             | Label: 13C(6)15N(2)(K) @ 7                                                                                                     | cleaved V-Y @ N-term            | 0.00092027  | 938.500244 | 470.2574   | 938.499329  | 470.256928 | 2  | 9       | 14.8156 | 36.87 |
| 35 | 23.16 | 27.25 | 38.4 CASC4_FlexIII | 99.0 EQLAELRQEFLR                        | Label: 13C(6)15N(4)(R) @ 7; Label: 13C(6)15N(4)(R) @ 12                                                                        | missed R-Q @ 7                  | -0.00758763 | 1550.82446 | 776.4195   | 1550.83203  | 776.423279 | 2  | 17      | 15.262  | 12.19 |
| 35 | 23.16 | 27.25 | 38.4 CASC4_FlexIII | 99.0 HVLLQEEVAELQGQVQR                   | Label: 13C(6)15N(4)(R) @ 17                                                                                                    | -0.0105395                      | 1985.04639  | 662.6894   | 1985.05701 | 662.692932  | 3          | 22 | 15.4402 | 12.19   |       |
| 35 | 23.16 | 27.25 | 38.4 CASC4_FlexIII | 99.0 LQNNISYQMAIDIHLK                    | Label: 13C(6)15N(2)(K) @ 16                                                                                                    | 0.0053365                       | 1931.98206  | 645.0013   | 1931.97669 | 644.999512  | 3          | 15 | 13.8347 | 12.19   |       |
| 35 | 23.16 | 27.25 | 38.4 CASC4_FlexIII | 99.0 LQNNISYQMAIDIHLKEQLAELR             | Deamidated(Q) @ 8; Label: 13C(6)15N(2)(K) @ 16; Label: 13C(6)15N(4)(R) @ 23                                                    | missed K-E @ 16                 | 0.0295023   | 2782.44849 | 696.6194   | 2782.41919  | 696.612061 | 4  | 15      | 16.5718 | 12.19 |
| 35 | 23.16 | 27.25 | 38.4 CASC4_FlexIII | 99.0 NSDLLLVDTTHK                        | Label: 13C(6)15N(2)(K) @ 12                                                                                                    | 0.00450826                      | 1374.76453  | 688.3895   | 1374.75989 | 688.387207  | 2          | 15 | 15.5249 | 12.19   |       |
| 35 | 23.16 | 27.25 | 38.4 CASC4_FlexIII | 99.0 NSDLLLVDTTHK                        | Label: 13C(6)15N(2)(K) @ 12; Label: 13C(6)15N(2)(K) @ 13                                                                       | 0.00261469                      | 1510.8717   | 756.4431   | 1510.86902 | 756.441773  | 2          | 16 | 14.7491 | 12.19   |       |
| 35 | 23.16 | 27.25 | 38.4 CASC4_FlexIII | 99.0 QEDQLODYR                           | Label: 13C(6)15N(4)(R) @ 9                                                                                                     | 0.00018682                      | 1203.53992  | 602.77713  | 1203.53955 | 602.7777039 | 2          | 11 | 12.6054 | 12.19   |       |
| 35 | 23.16 | 27.25 | 38.4 CASC4_FlexIII | 99.0 QEDQLODYRK                          | Gln->pyro-Glu @ N-term; Label: 13C(6)15N(4)(R) @ 9; Label: 13C(6)15N(2)(K) @ 10                                                | 0.00053903                      | 1322.62268  | 662.3186   | 1322.62219 | 662.318359  | 2          | 13 | 12.8103 | 12.19   |       |
| 35 | 23.16 | 27.25 | 38.4 CASC4_FlexIII | 99.0 QEFRLQEDQLQDYR                      | Gln->pyro-Glu @ N-term; Label: 13C(6)15N(4)(R) @ 5; Label: 13C(6)15N(4)(R) @ 14                                                | missed R-Q @ 5                  | -0.00113174 | 1869.87488 | 935.9447   | 1869.87598  | 935.945313 | 2  | 18      | 15.0802 | 12.19 |
| 35 | 23.16 | 27.25 | 38.4 CASC4_FlexIII | 99.0 QEFRLQEDQLQDYRK                     | Gln->pyro-Glu @ N-term; Label: 13C(6)15N(4)(R) @ 5; Label: 13C(6)15N(4)(R) @ 14; Label: 13C(6)15N(2)(K) @ 15                   | missed R-Q @ 5; missed R-K @ 14 | 0.00118279  | 2005.98633 | 669.6694   | 2005.98523  | 669.669006 | 3  | 17      | 14.4052 | 12.19 |
| 35 | 23.16 | 27.25 | 38.4 CASC4_FlexIII | 99.0 RNSDLLLVDTTHK                       | Label: 13C(6)15N(4)(R) @ 1; Label: 13C(6)15N(2)(K) @ 13; Label: 13C(6)15N(2)(K) @ 14                                           | -0.0021657                      | 1676.9762   | 559.9993   | 1676.97839 | 560.000061  | 3          | 13 | 14.2197 | 12.19   |       |
| 35 | 23.16 | 27.25 | 38.4 CASC4_FlexIII | 99.0 HVLLQEEVAELQGQVQR                   | Label: 13C(6)15N(4)(R) @ 17                                                                                                    | 0.00771338                      | 1985.0647   | 993.5396   | 1985.05701 | 993.535767  | 2          | 30 | 15.4493 | 12.19   |       |
| 35 | 23.16 | 27.25 | 38.4 CASC4_FlexIII | 99.0 HVLLQEEVAELQGQVQR                   | Label: 13C(6)15N(4)(R) @ 17                                                                                                    | -0.00248283                     | 1985.05444  | 662.6921   | 1985.05701 | 662.692932  | 3          | 21 | 15.7001 | 12.19   |       |
| 35 | 23.16 | 27.25 | 38.4 CASC4_FlexIII | 99.0 HVLLQEEVAELQGQVQR                   | Label: 13C(6)15N(4)(R) @ 17                                                                                                    | -0.0014419                      | 1985.05542  | 993.535    | 1985.05701 | 993.535767  | 2          | 27 | 15.7251 | 12.19   |       |
| 35 | 23.16 | 27.25 | 38.4 CASC4_FlexIII | 99.0 HVLLQEEVAELQGQVQR                   | Label: 13C(6)15N(4)(R) @ 17                                                                                                    | -0.00449366                     | 1985.05249  | 993.5335   | 1985.05701 | 993.535767  | 2          | 23 | 15.9956 | 12.19   |       |
| 35 | 23.16 | 27.25 | 38.4 CASC4_FlexIII | 99.0 HVLLQEEVAELQGQVQR                   | Label: 13C(6)15N(4)(R) @ 17                                                                                                    | -0.00358146                     | 1985.05335  | 662.6917   | 1985.05701 | 662.692932  | 3          | 20 | 15.9995 | 12.19   |       |
| 35 | 23.16 | 27.25 | 38.4 CASC4_FlexIII | 99.0 HVLLQEEVAELQGQVQR                   | Label: 13C(6)15N(4)(R) @ 17                                                                                                    | -0.00101798                     | 1985.05603  | 662.6926   | 1985.05701 | 662.692932  | 3          | 17 | 24.5796 | 12.19   |       |
| 35 | 23.16 | 27.25 | 38.4 CASC4_FlexIII | 99.0 HVLLQEEVAELQGQVQR                   | Deamidated(Q) @ 12; Label: 13C(6)15N(4)(R) @ 17                                                                                | 0.0255262                       | 1986.06641  | 663.0294   | 1986.04102 | 663.020935  | 3          | 14 | 16.7804 | 12.19   |       |
| 35 | 23.16 | 27.25 | 38.4 CASC4_FlexIII | 99.0 HVLLQEEVAELQGQVQR                   | Label: 13C(6)15N(4)(R) @ 17                                                                                                    | -0.00248283                     | 1985.05444  | 662.6921   | 1985.05701 | 662.692932  | 3          | 8  | 25.0667 | 12.19   |       |
| 35 | 23.16 | 27.25 | 38.4 CASC4_FlexIII | 99.0 IYPTFLYK                            | Label: 13C(6)15N(2)(K) @ 8                                                                                                     | -0.00022118                     | 1051.58313  | 526.7988   | 1051.58337 | 526.79895   | 2          | 9  | 15.3795 | 12.19   |       |
| 35 | 23.16 | 27.25 | 38.4 CASC4_FlexIII | 99.0 LQNNISYQMAIDIHLK                    | Label: 13C(6)15N(2)(K) @ 16                                                                                                    | -0.0086439                      | 1931.96814  | 483.9993   | 1931.97669 | 484.001465  | 4          | 13 | 13.8079 | 12.19   |       |
| 35 | 23.16 | 27.25 | 38.4 CASC4_FlexIII | 99.0 LQNNISYQMAIDIHLK                    | Deamidated(N) @ 4; Label: 13C(6)15N(2)(K) @ 16                                                                                 | 0.00569657                      | 1932.96643  | 645.3294   | 1932.96069 | 645.327515  | 3          | 13 | 14.1168 | 12.19   |       |
| 35 | 23.16 | 27.25 | 38.4 CASC4_FlexIII | 99.0 LQNNISYQMAIDIHLK                    | Deamidated(N) @ 4; Label: 13C(6)15N(2)(K) @ 16                                                                                 | 0.00135974                      | 1932.96216  | 484.2478   | 1932.96069 | 484.247467  | 4          | 12 | 14.0906 | 12.19   |       |
| 35 | 23.16 | 27.25 | 38.4 CASC4_FlexIII | 99.0 LQNNISYQMAIDIHLKEQLAELR             | Deamidated(Q) @ 8; Label: 13C(6)15N(2)(K) @ 16; Label: 13C(6)15N(4)(R) @ 23                                                    | missed K-E @ 16                 | -0.00883117 | 2782.41016 | 557.4893   | 2782.41919  | 557.491089 | 5  | 14      | 16.5955 | 12.19 |
| 35 | 23.16 | 27.25 | 38.4 CASC4_FlexIII | 99.0 LQNNISYQMAIDIHLKEQLAELR             | Deamidated(Q) @ 8; Label: 13C(6)15N(2)(K) @ 16; Label: 13C(6)15N(4)(R) @ 23                                                    | missed K-E @ 16                 | 0.0295023   | 2782.44849 | 696.6194   | 2782.41919  | 696.612061 | 4  | 14      | 16.8533 | 12.19 |
| 35 | 23.16 | 27.25 | 38.4 CASC4_FlexIII | 99.0 LQNNISYQMAIDIHLKEQLAELR             | Label: 13C(6)15N(2)(K) @ 16; Label: 13C(6)15N(4)(R) @ 23                                                                       | -0.00076839                     | 2781.43433  | 557.2941   | 2781.43506 | 557.294312  | 5          | 14 | 16.8773 | 12.19   |       |
| 35 | 23.16 | 27.25 | 38.4 CASC4_FlexIII | 99.0 NSDLLLVDTTHK                        | Label: 13C(6)15N(2)(K) @ 12                                                                                                    | -0.00379586                     | 1374.7561   | 459.2593   | 1374.75989 | 459.260559  | 3          | 13 | 15.5452 | 12.19   |       |
| 35 | 23.16 | 27.25 | 38.4 CASC4_FlexIII | 99.0 NSDLLLVDTTHK                        | Label: 13C(6)15N(2)(K) @ 12                                                                                                    | -0.00379586                     | 1374.7561   | 459.2593   | 1374.75989 | 459.2605    |            |    |         |         |       |

|    |       |      |                    |                                                        |                                                                                                          |                                |             |            |          |            |            |   |    |         |       |
|----|-------|------|--------------------|--------------------------------------------------------|----------------------------------------------------------------------------------------------------------|--------------------------------|-------------|------------|----------|------------|------------|---|----|---------|-------|
| 39 | 20.26 | 24.3 | 50.4 MUC15_FlexIII | 99.0 DGIPMDDIPPLR                                      | Label: 13C(6)15N(4)(R) @ 12                                                                              |                                | -0.00211422 | 1347.67102 | 674.8428 | 1347.67322 | 674.843872 | 2 | 13 | 15.5544 | 14.27 |
| 39 | 20.26 | 24.3 | 50.4 MUC15_FlexIII | 99.0 ENQDINTTQIAEVFK                                   | Label: 13C(6)15N(2)(K) @ 16                                                                              |                                | -0.00991951 | 1870.90527 | 936.4599 | 1870.91516 | 936.464905 | 2 | 18 | 15.2661 | 14.27 |
| 39 | 20.26 | 24.3 | 50.4 MUC15_FlexIII | 99.0 LDNAPEPYDVSGNSSYYNPTLNDSAMPESEENARDGIPMDDIPPLR    | Label: 13C(6)15N(4)(R) @ 35; Label: 13C(6)15N(4)(R) @ 47                                                 | missed R-D @ 35                | -0.0123903  | 5232.32275 | 1309.088 | 5232.33545 | 1309.09119 | 4 | 11 | 16.3657 | 14.27 |
| 39 | 20.26 | 24.3 | 50.4 MUC15_FlexIII | 99.0 LFPNTSDPQKENR                                     | Label: 13C(6)15N(2)(K) @ 10; Label: 13C(6)15N(4)(R) @ 13                                                 | missed K-E @ 10                | -0.00132271 | 1562.77942 | 782.397  | 1562.78076 | 782.397644 | 2 | 11 | 12.3087 | 14.27 |
| 39 | 20.26 | 24.3 | 50.4 MUC15_FlexIII | 99.0 LYDDRNEPVL                                        | Label: 13C(6)15N(4)(R) @ 5; Label: 13C(6)15N(4)(R) @ 11                                                  | missed R-N @ 5                 | -0.00127816 | 1408.72009 | 705.3673 | 1408.72131 | 705.367981 | 2 | 13 | 12.7949 | 14.27 |
| 39 | 20.26 | 24.3 | 50.4 MUC15_FlexIII | 99.0 RLYDDRNEPVL                                       | Label: 13C(6)15N(4)(R) @ 1; Label: 13C(6)15N(4)(R) @ 6; Label: 13C(6)15N(4)(R) @ 12                      | missed R-L @ 1; missed R-N @ 6 | -0.00515291 | 1574.82544 | 788.42   | 1574.83069 | 788.422669 | 2 | 17 | 12.5211 | 14.27 |
| 39 | 20.26 | 24.3 | 50.4 MUC15_FlexIII | 99.0 TMENKPISESEANLNSKENITTSNLK                        | Label: 13C(6)15N(2)(K) @ 5; Label: 13C(6)15N(2)(K) @ 19; Label: 13C(6)15N(2)(K) @ 28                     | missed K-E @ 19                | -0.0126831  | 3143.55933 | 786.8971 | 3143.57178 | 786.900208 | 4 | 17 | 14.0252 | 14.27 |
| 39 | 20.26 | 24.3 | 50.4 MUC15_FlexIII | 99.0 TTLQPTLK                                          | Label: 13C(6)15N(2)(K) @ 8                                                                               |                                | -0.00016859 | 908.542053 | 455.2783 | 908.542236 | 455.278381 | 2 | 8  | 12.9598 | 14.27 |
| 39 | 20.26 | 24.3 | 50.4 MUC15_FlexIII | 99.0 VPWNAPIADELLPISAHPNATPALSSENFTWSLVNDTVK           | Label: 13C(6)15N(2)(K) @ 40                                                                              |                                | -0.00653255 | 4337.1665  | 1085.299 | 4337.17334 | 1085.30066 | 4 | 21 | 16.937  | 14.27 |
| 39 | 20.26 | 24.3 | 50.4 MUC15_FlexIII | 99.0 ASHSPPPLNPNNSHGITDFSSNSSAEHSLGSKPTSTISTSPLIHSFVSK | Deamidated(N) @ 22; Label: 13C(6)15N(2)(K) @ 33; Label: 13C(6)15N(2)(K) @ 51                             |                                | 0.0219139   | 5298.66357 | 1060.74  | 5298.64063 | 1060.73535 | 5 | 15 | 14.8782 | 14.27 |
| 39 | 20.26 | 24.3 | 50.4 MUC15_FlexIII | 99.0 ASHSPPPLNPNNSHGITDFSSNSSAEHSLGSKPTSTISTSPLIHSFVSK | Deamidated(N) @ 22; Label: 13C(6)15N(2)(K) @ 33; Label: 13C(6)15N(2)(K) @ 51                             |                                | 0.0297125   | 5298.66943 | 757.9601 | 5298.64063 | 757.955933 | 7 | 13 | 24.6691 | 14.27 |
| 39 | 20.26 | 24.3 | 50.4 MUC15_FlexIII | 99.0 ASHSPPPLNPNNSHGITDFSSNSSAEHSLGSKPTSTISTSPLIHSFVSK | Deamidated(N) @ 22; Label: 13C(6)15N(2)(K) @ 33; Label: 13C(6)15N(2)(K) @ 51                             |                                | 0.0297125   | 5298.66943 | 757.9601 | 5298.64063 | 757.955933 | 7 | 11 | 24.9262 | 14.27 |
| 39 | 20.26 | 24.3 | 50.4 MUC15_FlexIII | 99.0 ASHSPPPLNPNNSHGITDFSSNSSAEHSLGSKPTSTISTSPLIHSFVSK | Deamidated(N) @ 22; Label: 13C(6)15N(2)(K) @ 33; Label: 13C(6)15N(2)(K) @ 51                             |                                | 0.0235715   | 5298.66406 | 663.3403 | 5298.64063 | 663.337341 | 8 | 12 | 14.5671 | 14.27 |
| 39 | 20.26 | 24.3 | 50.4 MUC15_FlexIII | 99.0 ASHSPPPLNPNNSHGITDFSSNSSAEHSLGSKPTSTISTSPLIHSFVSK | Deamidated(N) @ 22; Label: 13C(6)15N(2)(K) @ 33; Label: 13C(6)15N(2)(K) @ 51                             |                                | 0.0357314   | 5298.67627 | 884.12   | 5298.64063 | 884.114014 | 6 | 11 | 14.6133 | 14.27 |
| 39 | 20.26 | 24.3 | 50.4 MUC15_FlexIII | 99.0 DGIPMDDIPPLR                                      | Label: 13C(6)15N(4)(R) @ 12                                                                              |                                | 0.0001066   | 1347.67322 | 450.2317 | 1347.67322 | 450.23169  | 3 | 12 | 15.8587 | 14.27 |
| 39 | 20.26 | 24.3 | 50.4 MUC15_FlexIII | 99.0 DGIPMDDIPPLR                                      | Label: 13C(6)15N(4)(R) @ 12                                                                              |                                | -0.00125973 | 1347.67212 | 674.8433 | 1347.67322 | 674.843872 | 2 | 12 | 15.9779 | 14.27 |
| 39 | 20.26 | 24.3 | 50.4 MUC15_FlexIII | 99.0 DGIPMDDIPPLR                                      | Label: 13C(6)15N(4)(R) @ 12                                                                              |                                | -0.00346395 | 1347.66968 | 450.2305 | 1347.67322 | 450.23169  | 3 | 11 | 15.5807 | 14.27 |
| 39 | 20.26 | 24.3 | 50.4 MUC15_FlexIII | 99.0 DGIPMDDIPPLR                                      | Label: 13C(6)15N(4)(R) @ 12                                                                              |                                | -0.00064938 | 1347.67273 | 674.8436 | 1347.67322 | 674.843872 | 2 | 11 | 15.7127 | 14.27 |
| 39 | 20.26 | 24.3 | 50.4 MUC15_FlexIII | 99.0 DGIPMDDIPPLR                                      | Label: 13C(6)15N(4)(R) @ 12                                                                              |                                | -0.00724116 | 1347.66602 | 674.8403 | 1347.67322 | 674.843872 | 2 | 9  | 24.7522 | 14.27 |
| 39 | 20.26 | 24.3 | 50.4 MUC15_FlexIII | 99.0 DGIPMDDIPPLR                                      | Label: 13C(6)15N(4)(R) @ 12                                                                              |                                | -0.00724116 | 1347.66602 | 674.8403 | 1347.67322 | 674.843872 | 2 | 6  | 26.1106 | 14.27 |
| 39 | 20.26 | 24.3 | 50.4 MUC15_FlexIII | 99.0 DGIPMDDIPPLR                                      |                                                                                                          |                                | -0.00115704 | 1337.66382 | 669.8392 | 1337.66492 | 669.839722 | 2 | 10 | 15.8609 | 14.27 |
| 39 | 20.26 | 24.3 | 50.4 MUC15_FlexIII | 99.0 DGIPMDDIPPLR                                      | Label: 13C(6)15N(4)(R) @ 12                                                                              |                                | -0.00724116 | 1347.66602 | 674.8403 | 1347.67322 | 674.843872 | 2 | 6  | 25.8468 | 14.27 |
| 39 | 20.26 | 24.3 | 50.4 MUC15_FlexIII | 99.0 DGIPMDDIPPLR                                      | Label: 13C(6)15N(4)(R) @ 12                                                                              |                                | -0.00724116 | 1347.66602 | 674.8403 | 1347.67322 | 674.843872 | 2 | 6  | 25.5811 | 14.27 |
| 39 | 20.26 | 24.3 | 50.4 MUC15_FlexIII | 99.0 DGIPMDDIPPLR                                      | Label: 13C(6)15N(4)(R) @ 12                                                                              |                                | -3.90E-05   | 1347.67322 | 674.8439 | 1347.67322 | 674.843872 | 2 | 9  | 24.4865 | 14.27 |
| 39 | 20.26 | 24.3 | 50.4 MUC15_FlexIII | 99.0 DGIPMDDIPPLR                                      | Label: 13C(6)15N(4)(R) @ 12                                                                              |                                | -0.00724116 | 1347.66602 | 674.8403 | 1347.67322 | 674.843872 | 2 | 7  | 25.2955 | 14.27 |
| 39 | 20.26 | 24.3 | 50.4 MUC15_FlexIII | 99.0 LFPNTSDPQKENR                                     | Label: 13C(6)15N(2)(K) @ 10; Label: 13C(6)15N(4)(R) @ 13                                                 | missed K-E @ 10                | -0.0113699  | 1562.76941 | 521.9304 | 1562.78076 | 521.934204 | 3 | 11 | 12.277  | 14.27 |
| 39 | 20.26 | 24.3 | 50.4 MUC15_FlexIII | 99.0 LFPNTSDPQKENR                                     | Label: 13C(6)15N(2)(K) @ 10; Label: 13C(6)15N(4)(R) @ 13                                                 | missed K-E @ 10                | -0.0113699  | 1562.76941 | 521.9304 | 1562.78076 | 521.934204 | 3 | 11 | 12.5396 | 14.27 |
| 39 | 20.26 | 24.3 | 50.4 MUC15_FlexIII | 99.0 LYDDRNEPVL                                        | Label: 13C(6)15N(4)(R) @ 5; Label: 13C(6)15N(4)(R) @ 11                                                  | missed R-N @ 5                 | -0.00054574 | 1408.72083 | 705.3677 | 1408.72131 | 705.367981 | 2 | 10 | 13.0751 | 14.27 |
| 39 | 20.26 | 24.3 | 50.4 MUC15_FlexIII | 99.0 TMENKPISESEANLNSKENITTSNLK                        | Label: 13C(6)15N(2)(K) @ 5; Deamidated(N) @ 16; Label: 13C(6)15N(2)(K) @ 19; Label: 13C(6)15N(2)(K) @ 28 | missed K-E @ 19                | 0.0155071   | 3144.57129 | 787.1501 | 3144.55591 | 787.14624  | 4 | 22 | 13.7663 | 14.27 |
| 39 | 20.26 | 24.3 | 50.4 MUC15_FlexIII | 99.0 TMENKPISESEANLNSKENITTSNLK                        | Label: 13C(6)15N(2)(K) @ 5; Label: 13C(6)15N(2)(K) @ 19; Label: 13C(6)15N(2)(K) @ 28                     | missed K-E @ 19                | -0.00672519 | 3143.56445 | 1048.862 | 3143.57178 | 1048.8645  | 3 | 21 | 14.0023 | 14.27 |
| 39 | 20.26 | 24.3 | 50.4 MUC15_FlexIII | 99.0 TMENKPISESEANLNSKENITTSNLK                        | Label: 13C(6)15N(2)(K) @ 5; Label: 13C(6)15N(2)(K) @ 19; Label: 13C(6)15N(2)(K) @ 28                     | missed K-E @ 19                | -0.00047606 | 3143.57129 | 786.9001 | 3143.57178 | 786.900208 | 4 | 20 | 18.7364 | 14.27 |
| 39 | 20.26 | 24.3 | 50.4 MUC15_FlexIII | 99.0 TMENKPISESEANLNSKENITTSNLK                        | Label: 13C(6)15N(2)(K) @ 5; Deamidated(N) @ 14; Label: 13C(6)15N(2)(K) @ 19; Label: 13C(6)15N(2)(K) @ 28 | missed K-E @ 19                | 0.0155071   | 3144.57129 | 787.1501 | 3144.55591 | 787.14624  | 4 | 19 | 24.4543 | 14.27 |
| 39 | 20.26 | 24.3 | 50.4 MUC15_FlexIII | 99.0 TMENKPISESEANLNSKENITTSNLK                        | Label: 13C(6)15N(2)(K) @ 5; Deamidated(N) @ 16; Label: 13C(6)15N(2)(K) @ 19; Label: 13C(6)15N(2)(K) @ 28 | missed K-E @ 19                | 0.0155071   | 3144.57129 | 787.1501 | 3144.55591 | 787.14624  | 4 | 15 | 24.7216 | 14.27 |
| 39 | 20.26 | 24.3 | 50.4 MUC15_FlexIII | 99.0 TMENKPISESEANLNSKENITTSNLK                        | Label: 13C(6)15N(2)(K) @ 5; Deamidated(N) @ 16; Label: 13C(6)15N(2)(K) @ 19; Label: 13C(6)15N(2)(K) @ 28 | missed K-E @ 19                | 0.0155071   | 3144.57129 | 787.1501 | 3144.55591 | 787.14624  | 4 | 10 | 25.2373 | 14.27 |
| 39 | 20.26 | 24.3 | 50.4 MUC15_FlexIII | 99.0 TSVYPTFLYK                                        | Label: 13C(6)15N(2)(K) @ 10                                                                              |                                | 0.00123614  | 1225.64868 | 613.8316 | 1225.64746 | 613.830994 | 2 | 8  | 26.1589 | 14.27 |
| 39 | 20.26 | 24.3 | 50.4 MUC15_FlexIII | 99.0 TSVYPTFLYK                                        | Label: 13C(6)15N(2)(K) @ 10                                                                              |                                | -0.00071698 | 1225.64673 | 613.8306 | 1225.64746 | 613.830994 | 2 | 11 | 15.2923 | 14.27 |
| 39 | 20.26 | 24.3 | 50.4 MUC15_FlexIII | 99.0 TSVYPTFLYK                                        |                                                                                                          |                                | -0.00030195 | 1217.63294 | 609.8237 | 1217.63318 | 609.823914 | 2 | 11 | 15.3486 | 14.27 |
| 39 | 20.26 | 24.3 | 50.4 MUC15_FlexIII | 99.0 TSVYPTFLYK                                        | Label: 13C(6)15N(2)(K) @ 10                                                                              |                                | -0.00120526 | 1225.64624 | 613.8304 | 1225.64746 | 613.830994 | 2 | 11 | 15.5532 | 14.27 |
| 39 | 20.26 | 24.3 | 50.4 MUC15_FlexIII | 99.0 TSVYPTFLYK                                        | Label: 13C(6)15N(2)(K) @ 10                                                                              |                                | -0.00059491 | 1225.64685 | 613.8307 | 1225.64746 | 613.830994 | 2 | 11 | 15.8636 | 14.27 |
| 39 | 20.26 | 24.3 | 50.4 MUC15_FlexIII | 99.0 TSVYPTFLYK                                        | Label: 13C(6)15N(2)(K) @ 10                                                                              |                                | 1.54E-05    | 1225.64746 | 613.831  | 1225.64746 | 613.830994 | 2 | 8  | 25.6157 | 14.27 |
| 39 | 20.26 | 24.3 | 50.4 MUC15_FlexIII | 99.0 TSVYPTFLYK                                        | Label: 13C(6)15N(2)(K) @ 10                                                                              |                                | -0.00132733 | 1225.64612 | 613.8303 | 1225.64746 | 613.830994 | 2 | 9  | 25.0926 | 14.27 |
| 39 | 20.26 | 24.3 | 50.4 MUC15_FlexIII | 99.0 TSVYPTFLYK                                        | Label: 13C(6)15N(2)(K) @ 10                                                                              |                                | 0.00660723  | 1225.65405 | 613.8343 | 1225.64746 | 613.830994 | 2 | 6  | 26.4127 | 14.27 |
| 39 | 20.26 | 24.3 | 50.4 MUC15_FlexIII | 99.0 TSVYPTFLYK                                        | Label: 13C(6)15N(2)(K) @ 10                                                                              |                                | 0.00062579  | 1225.64807 | 613.8313 | 1225.64746 | 613.830994 | 2 | 6  | 26.6693 | 14.27 |
| 39 | 20.26 | 24.3 | 50.4 MUC15_FlexIII | 99.0 TSVYPTFLYK                                        | Label: 13C(6)15N(2)(K) @ 10                                                                              |                                | 0.00038165  | 1225.64783 | 613.8312 | 1225.64746 | 613.830994 | 2 | 10 | 16.419  | 14.27 |
| 39 | 20.26 | 24.3 | 50.4 MUC15_FlexIII | 99.0 TSVYPTFLYK                                        | Label: 13C(6)15N(2)(K) @ 10                                                                              |                                | -0.00132733 | 1225.64612 | 613.8303 | 1225.64746 | 613.830994 | 2 | 10 | 17.0098 | 14.27 |
| 39 | 20.26 | 24.3 | 50.4 MUC15_FlexIII | 99.0 TSVYPTFLYK                                        | Label: 13C(6)15N(2)(K) @ 10                                                                              |                                | -0.00132733 | 1225.64612 | 613.8303 | 1225.64746 | 613.830994 | 2 | 9  | 18.441  | 14.27 |
| 39 | 20.26 | 24.3 | 50.4 MUC15_FlexIII | 99.0 TSVYPTFLYK                                        | Label: 13C(6)15N(2)(K) @ 10                                                                              |                                | -0.00132733 | 1225.64612 | 613.8303 | 1225.64746 | 613.830994 | 2 | 9  | 18.1405 | 14.27 |
| 39 | 20.26 | 24.3 | 50.4 MUC15_FlexIII | 99.0 TSVYPTFLYK                                        | Label: 13C(6)15N(2)(K) @ 10                                                                              |                                | 0.00245684  | 1225.6499  | 613.8322 | 1225.64746 | 613.830994 | 2 | 9  | 24.2937 | 14.27 |
| 39 | 20.26 | 24.3 | 50.4 MUC15_FlexIII | 99.0 TSVYPTFLYK                                        | Label: 13C(6)15N(2)(K) @ 10                                                                              |                                | -0.00132733 | 1225.64612 | 613.8303 | 1225.64746 | 613.830994 | 2 | 8  | 19.2216 | 14.27 |
| 39 | 20.26 | 24.3 | 50.4 MUC15_FlexIII | 99.0 TSVYPTFLYK                                        | Label: 13C(6)15N(2)(K) @ 10                                                                              |                                | -0.00132733 | 1225.64612 | 613.8303 | 1225.64746 | 613.830994 | 2 | 6  | 26.927  | 14.27 |
| 39 | 20.26 | 24.3 | 50.4 MUC15_FlexIII | 99.0 TSVYPTFLYK                                        | Label: 13C(6)15N(2)(K) @ 10                                                                              |                                | -0.00132733 | 1225.64612 | 613.8303 | 1225.64746 | 613.830994 | 2 | 8  | 24.8077 | 14.27 |
| 39 | 20.26 | 24.3 | 50.4 MUC15_FlexIII | 99.0 TSVYPTFLYK                                        | Label: 13C(6)15N(2)(K) @ 10                                                                              |                                | -0.00132733 | 1225.64612 | 613.8303 | 1225.64746 | 613.830994 | 2 | 8  | 18.9697 | 14.27 |
| 39 | 20.26 | 24.3 | 50.4 MUC15_FlexIII | 99.0 TTLQPTLK                                          | Label: 13C(6)15N(2)(K) @ 8                                                                               |                                | 0.00422593  | 908.546448 | 455.2805 | 908.542236 | 455.278381 | 2 | 8  | 24.3779 | 14.27 |
| 39 | 20.26 | 24.3 | 50.4 MUC15_FlexIII | 99.0 TTLQPTLK                                          | Label: 13C(6)15N(2)(K) @ 8                                                                               |                                | 1.45E-05    | 908.542297 | 455.2784 | 908.542236 | 455.278381 | 2 | 9  | 12.8606 | 14.27 |
| 39 | 20.26 | 24.3 | 50.4 MUC15_FlexIII | 99.0 TTLQPTLK                                          | Label: 13C(6)15N(2)(K) @ 8                                                                               |                                | 0.00422593  | 908.546448 | 455.2805 | 908.542236 | 455.278381 | 2 | 8  | 13.231  | 14.27 |
| 39 | 20.26 | 24.3 | 50.4 MUC15_FlexIII | 99.0 VPWNAPIADELLPISAHPNATPALSSENFTWSLVNDTVK           | Deamidated(N) @ 20; Label: 13C(6)15N(2)(K) @ 40                                                          |                                | 0.000605621 | 4338.16357 | 868.64   | 4338.15772 | 868.638794 | 5 | 20 | 17.2548 | 14.27 |
| 39 | 20.26 | 24.3 | 50.4 MUC15_FlexIII | 99.0 VPWNAPIADELLPISAHPNATPALSSENFTWSLVNDTVK           | Deamidated(N) @ 29; Label: 13C(6)15N(2)(K) @ 40                                                          |                                | 0.0123803   | 4338.1709  | 1085.55  | 4338.15772 | 1085.54663 | 4 | 19 | 17.7979 | 14.27 |
| 39 | 20.26 | 24.3 | 50.4 MUC15_FlexIII | 99.0 VPWNAPIADELLPISAHPNATPALSSEN                      |                                                                                                          |                                |             |            |          |            |            |   |    |         |       |

|    |       |       |                      |                                           |                                                                                                     |                               |             |            |          |            |            |   |    |         |       |
|----|-------|-------|----------------------|-------------------------------------------|-----------------------------------------------------------------------------------------------------|-------------------------------|-------------|------------|----------|------------|------------|---|----|---------|-------|
| 40 | 20.03 | 22.17 | 74.7 C3ORF10_FlexIII | 99.0 RIEYIEAR                             | Label: 13C(6)15N(4)(R)@ 1; Label: 13C(6)15N(4)(R)@ 8                                                | missed R-I@ 1                 | 0.00030646  | 1068.5835  | 535.299  | 1068.58313 | 535.298828 | 2 | 13 | 12.6917 | 28.59 |
| 40 | 20.03 | 22.17 | 74.7 C3ORF10_FlexIII | 99.0 SRLATLNEK                            | Label: 13C(6)15N(4)(R)@ 2; Label: 13C(6)15N(2)(K)@ 9                                                | missed R-L@ 2                 | 0.00764136  | 1048.6073  | 525.3109 | 1048.59961 | 525.307068 | 2 | 13 | 11.6939 | 28.59 |
| 40 | 20.03 | 22.17 | 74.7 C3ORF10_FlexIII | 99.0 VTKGETLTYPTFLYK                      | Label: 13C(6)15N(2)(K)@ 3; Label: 13C(6)15N(2)(K)@ 15                                               | missed K-G@ 3                 | -0.00360943 | 1775.96448 | 888.9895 | 1775.96802 | 888.991272 | 2 | 19 | 15.4561 | 28.59 |
| 40 | 20.03 | 22.17 | 74.7 C3ORF10_FlexIII | 99.0 EIHQDVAWREYIEITSSIKK                 | Deamidated(N)@ 8; Label: 13C(6)15N(4)(R)@ 9; Label: 13C(6)15N(2)(K)@ 20; Label: 13C(6)15N(2)(K)@ 21 | missed R-E@ 9; missed K-K@ 20 | 0.0244603   | 2599.37378 | 650.8507 | 2599.34912 | 650.844605 | 4 | 12 | 16.6074 | 28.59 |
| 40 | 20.03 | 22.17 | 74.7 C3ORF10_FlexIII | 99.0 EYIEITSSIKK                          | Label: 13C(6)15N(2)(K)@ 11; Label: 13C(6)15N(2)(K)@ 12                                              | missed K-K@ 11                | 0.0009495   | 1438.82642 | 480.6161 | 1438.82544 | 480.615753 | 3 | 13 | 15.0518 | 28.59 |
| 40 | 20.03 | 22.17 | 74.7 C3ORF10_FlexIII | 99.0 GETLTYPTFLYK                         |                                                                                                     |                               | -0.00223436 | 1431.72632 | 716.8704 | 1431.72864 | 716.871582 | 2 | 14 | 15.9191 | 28.59 |
| 40 | 20.03 | 22.17 | 74.7 C3ORF10_FlexIII | 99.0 GETLTYPTFLYK                         | Label: 13C(6)15N(2)(K)@ 12                                                                          |                               | -0.00081873 | 1439.74182 | 720.8782 | 1439.7428  | 720.878662 | 2 | 14 | 16.1472 | 28.59 |
| 40 | 20.03 | 22.17 | 74.7 C3ORF10_FlexIII | 99.0 GETLTYPTFLYK                         | Label: 13C(6)15N(2)(K)@ 12                                                                          |                               | 0.00113439  | 1439.7439  | 720.8792 | 1439.7428  | 720.878662 | 2 | 13 | 16.4545 | 28.59 |
| 40 | 20.03 | 22.17 | 74.7 C3ORF10_FlexIII | 99.0 GETLTYPTFLYK                         | Label: 13C(6)15N(2)(K)@ 12                                                                          |                               | 0.00394201  | 1439.7467  | 720.8806 | 1439.7428  | 720.878662 | 2 | 11 | 17.6739 | 28.59 |
| 40 | 20.03 | 22.17 | 74.7 C3ORF10_FlexIII | 99.0 IADFLNSFDMSCR                        | Oxidation(M)@ 10; Propionamide(C)@ 12; Label: 13C(6)15N(4)(R)@ 13                                   |                               | 0.00187536  | 1614.70642 | 808.3605 | 1614.70459 | 808.359558 | 2 | 17 | 16.034  | 28.59 |
| 40 | 20.03 | 22.17 | 74.7 C3ORF10_FlexIII | 99.0 IADFLNSFDMSCR                        | Propionamide(C)@ 12; Label: 13C(6)15N(4)(R)@ 13                                                     |                               | -0.00318923 | 1598.70642 | 800.3605 | 1598.70972 | 800.362122 | 2 | 16 | 16.6414 | 28.59 |
| 40 | 20.03 | 22.17 | 74.7 C3ORF10_FlexIII | 99.0 IADFLNSFDMSCR                        | Deamidated(N)@ 6; Propionamide(C)@ 12; Label: 13C(6)15N(4)(R)@ 13                                   |                               | -0.00722562 | 1599.68652 | 800.8505 | 1599.69373 | 800.854126 | 2 | 14 | 16.0649 | 28.59 |
| 40 | 20.03 | 22.17 | 74.7 C3ORF10_FlexIII | 99.0 RIEYIEAR                             | Label: 13C(6)15N(4)(R)@ 1; Label: 13C(6)15N(4)(R)@ 8                                                | missed R-I@ 1                 | 0.0005506   | 1068.58362 | 535.2991 | 1068.58313 | 535.298828 | 2 | 12 | 12.9478 | 28.59 |
| 40 | 20.03 | 22.17 | 74.7 C3ORF10_FlexIII | 99.0 RIEYIEAR                             | Label: 13C(6)15N(4)(R)@ 1; Label: 13C(6)15N(4)(R)@ 8                                                | missed R-I@ 1                 | -5.97E-05   | 1068.58313 | 535.2988 | 1068.58313 | 535.298828 | 2 | 12 | 13.2226 | 28.59 |
| 40 | 20.03 | 22.17 | 74.7 C3ORF10_FlexIII | 99.0 RIEYIEAR                             | Label: 13C(6)15N(4)(R)@ 1; Label: 13C(6)15N(4)(R)@ 8                                                | missed R-I@ 1                 | 0.00409064  | 1068.58704 | 535.3008 | 1068.58313 | 535.298828 | 2 | 11 | 13.547  | 28.59 |
| 40 | 20.03 | 22.17 | 74.7 C3ORF10_FlexIII | 99.0 RIEYIEAR                             | Label: 13C(6)15N(4)(R)@ 1; Label: 13C(6)15N(4)(R)@ 8                                                | missed R-I@ 1                 | 0.00409064  | 1068.58704 | 535.3008 | 1068.58313 | 535.298828 | 2 | 9  | 19.9177 | 28.59 |
| 40 | 20.03 | 22.17 | 74.7 C3ORF10_FlexIII | 99.0 RIEYIEAR                             | Label: 13C(6)15N(4)(R)@ 1; Label: 13C(6)15N(4)(R)@ 8                                                | missed R-I@ 1                 | -0.00155629 | 1068.58154 | 357.2011 | 1068.58313 | 357.20163  | 3 | 9  | 12.8059 | 28.59 |
| 40 | 20.03 | 22.17 | 74.7 C3ORF10_FlexIII | 99.0 RIEYIEAR                             | Label: 13C(6)15N(4)(R)@ 1; Label: 13C(6)15N(4)(R)@ 8                                                | missed R-I@ 1                 | 0.00201426  | 1068.58508 | 357.2023 | 1068.58313 | 357.20163  | 3 | 9  | 24.5376 | 28.59 |
| 40 | 20.03 | 22.17 | 74.7 C3ORF10_FlexIII | 99.0 RIEYIEAR                             | Label: 13C(6)15N(4)(R)@ 1; Label: 13C(6)15N(4)(R)@ 8                                                | missed R-I@ 1                 | 0.00137339  | 1068.58447 | 357.2021 | 1068.58313 | 357.20163  | 3 | 9  | 12.5457 | 28.59 |
| 40 | 20.03 | 22.17 | 74.7 C3ORF10_FlexIII | 99.0 RIEYIEAR                             | Label: 13C(6)15N(4)(R)@ 1; Label: 13C(6)15N(4)(R)@ 8                                                | missed R-I@ 1                 | -0.0159289  | 1068.56702 | 535.2908 | 1068.58313 | 535.298828 | 2 | 9  | 18.7549 | 28.59 |
| 40 | 20.03 | 22.17 | 74.7 C3ORF10_FlexIII | 99.0 SRLATLNEK                            | Label: 13C(6)15N(4)(R)@ 2; Label: 13C(6)15N(2)(K)@ 9                                                | missed R-L@ 2                 | 0.0015977   | 1048.60107 | 350.541  | 1048.59961 | 350.540466 | 3 | 11 | 11.6955 | 28.59 |
| 40 | 20.03 | 22.17 | 74.7 C3ORF10_FlexIII | 99.0 VTKGETLTYPTFLYK                      | Label: 13C(6)15N(2)(K)@ 3; Label: 13C(6)15N(2)(K)@ 15                                               | missed K-G@ 3                 | -0.00177838 | 1775.96631 | 888.9904 | 1775.96802 | 888.991272 | 2 | 23 | 15.1884 | 28.59 |
| 40 | 20.03 | 22.17 | 74.7 C3ORF10_FlexIII | 99.0 VTKGETLTYPTFLYK                      | Label: 13C(6)15N(2)(K)@ 3; Label: 13C(6)15N(2)(K)@ 15                                               | missed K-G@ 3                 | -0.00177838 | 1775.96631 | 888.9904 | 1775.96802 | 888.991272 | 2 | 20 | 15.7328 | 28.59 |
| 40 | 20.03 | 22.17 | 74.7 C3ORF10_FlexIII | 99.0 VTKGETLTYPTFLYK                      | Label: 13C(6)15N(2)(K)@ 3; Label: 13C(6)15N(2)(K)@ 15                                               | missed K-G@ 3                 | -0.00065042 | 1775.96741 | 592.9964 | 1775.96802 | 592.996643 | 3 | 14 | 15.2097 | 28.59 |
| 40 | 20.03 | 22.17 | 74.7 C3ORF10_FlexIII | 99.0 VTKGETLTYPTFLYK                      | Label: 13C(6)15N(2)(K)@ 3; Label: 13C(6)15N(2)(K)@ 15                                               | missed K-G@ 3                 | -0.00065042 | 1775.96741 | 592.9964 | 1775.96802 | 592.996643 | 3 | 14 | 15.7305 | 28.59 |
| 40 | 20.03 | 22.17 | 74.7 C3ORF10_FlexIII | 99.0 VTKGETLTYPTFLYK                      | Label: 13C(6)15N(2)(K)@ 3; Label: 13C(6)15N(2)(K)@ 15                                               | missed K-G@ 3                 | -0.00101663 | 1775.96704 | 592.9963 | 1775.96802 | 592.996643 | 3 | 13 | 15.4663 | 28.59 |
| 40 | 20.03 | 22.17 | 74.7 C3ORF10_FlexIII | 99.0 VTKGETLTYPTFLYK                      | Label: 13C(6)15N(2)(K)@ 3; Label: 13C(6)15N(2)(K)@ 15                                               | missed K-G@ 3                 | 0.0125332   | 1775.98059 | 593.0008 | 1775.96802 | 592.996643 | 3 | 13 | 15.9897 | 28.59 |
| 40 | 20.03 | 22.17 | 74.7 C3ORF10_FlexIII | 99.0 VTKGETLTYPTFLYK                      | Label: 13C(6)15N(2)(K)@ 3; Label: 13C(6)15N(2)(K)@ 15                                               | missed K-G@ 3                 | 0.00264548  | 1775.9707  | 592.9975 | 1775.96802 | 592.996643 | 3 | 13 | 24.5025 | 28.59 |
| 40 | 20.03 | 22.17 | 74.7 C3ORF10_FlexIII | 99.0 YPTFLYK                              | Label: 13C(6)15N(2)(K)@ 7                                                                           | cleaved T-Y@ N-term           | 0.00057017  | 938.49878  | 470.2572 | 938.499329 | 470.256928 | 2 | 9  | 15.0367 | 28.59 |
| 40 | 20.03 | 22.17 | 74.7 C3ORF10_FlexIII | 99.0 YPTFLYK                              | Label: 13C(6)15N(2)(K)@ 7                                                                           | cleaved T-Y@ N-term           | 0.00819955  | 938.507446 | 470.261  | 938.499329 | 470.256928 | 2 | 9  | 14.7754 | 28.59 |
| 40 | 20.03 | 22.17 | 74.7 C3ORF10_FlexIII | 99.0 YPTFLYK                              | Label: 13C(6)15N(2)(K)@ 7                                                                           | cleaved T-Y@ N-term           | 0.00073716  | 938.500061 | 470.2573 | 938.499329 | 470.256928 | 2 | 9  | 15.0782 | 28.59 |
| 40 | 20.03 | 22.17 | 74.7 C3ORF10_FlexIII | 99.0 YPTFLYK                              | Label: 13C(6)15N(2)(K)@ 7                                                                           | cleaved T-Y@ N-term           | 0.00092027  | 938.500244 | 470.2574 | 938.499329 | 470.256928 | 2 | 9  | 14.8156 | 28.59 |
| 43 | 19.36 | 21.5  | 48.2 RBM9_FlexIII    | 99.0 AVPPTAIPAYPGVVYQDGFYGADLYGGYAA YR    | Label: 13C(6)15N(4)(R)@ 32                                                                          |                               | -0.00967784 | 3391.63428 | 1131.552 | 3391.64282 | 1131.55493 | 3 | 23 | 17.6482 | 17.19 |
| 43 | 19.36 | 21.5  | 48.2 RBM9_FlexIII    | 99.0 EKLHGT VVEGR                         | Label: 13C(6)15N(2)(K)@ 2; Label: 13C(6)15N(4)(R)@ 11                                               | missed K-L@ 2                 | -0.0006786  | 1241.68408 | 621.8493 | 1241.68469 | 621.849609 | 2 | 16 | 10.9612 | 17.19 |
| 43 | 19.36 | 21.5  | 48.2 RBM9_FlexIII    | 99.0 LHGTVVEGR                            | Label: 13C(6)15N(4)(R)@ 9                                                                           |                               | 0.00260168  | 976.535461 | 326.5191 | 976.532959 | 326.51825  | 3 | 11 | 11.0373 | 17.19 |
| 43 | 19.36 | 21.5  | 48.2 RBM9_FlexIII    | 99.0 LHVSNIPFR                            | Label: 13C(6)15N(4)(R)@ 9                                                                           |                               | -0.00563695 | 1091.60584 | 546.8102 | 1091.61157 | 546.813049 | 2 | 12 | 14.0128 | 17.19 |
| 43 | 19.36 | 21.5  | 48.2 RBM9_FlexIII    | 99.0 LSPVGAIVGP ELYAASSFOADVSLGNDAAVPLSGR | Deamidated(Q)@ 20; Label: 13C(6)15N(4)(R)@ 36                                                       |                               | 0.0200943   | 3587.82227 | 1196.948 | 3587.80225 | 1196.94141 | 3 | 21 | 17.5729 | 17.19 |
| 43 | 19.36 | 21.5  | 48.2 RBM9_FlexIII    | 99.0 RLHVSNIFFR                           | Label: 13C(6)15N(4)(R)@ 1; Label: 13C(6)15N(4)(R)@ 10                                               | missed R-L@ 1                 | 0.00916379  | 1257.72998 | 420.2506 | 1257.72095 | 420.247589 | 3 | 13 | 15.0887 | 17.19 |
| 43 | 19.36 | 21.5  | 48.2 RBM9_FlexIII    | 99.0 VYTADPYHALAPAASYGVGAVASLYR           | Label: 13C(6)15N(4)(R)@ 26                                                                          |                               | -0.0116311  | 2692.34131 | 1347.178 | 2692.35254 | 1347.18347 | 2 | 21 | 16.7032 | 17.19 |
| 43 | 19.36 | 21.5  | 48.2 RBM9_FlexIII    | 99.0 YAQPATATAATAAAAAAAYSDGYGR            | Label: 13C(6)15N(4)(R)@ 26                                                                          |                               | -0.0238281  | 2469.15625 | 824.0593 | 2469.17993 | 824.067261 | 3 | 12 | 16.2463 | 17.19 |
| 43 | 19.36 | 21.5  | 48.2 RBM9_FlexIII    | 99.0 FRDPDLR                              | Label: 13C(6)15N(4)(R)@ 7; Label: 13C(6)15N(4)(R)@ 10                                               | missed R-D@ 2                 | 0.00281963  | 937.491333 | 313.5044 | 937.488464 | 313.503418 | 3 | 9  | 12.5319 | 17.19 |
| 43 | 19.36 | 21.5  | 48.2 RBM9_FlexIII    | 99.0 KIEVNNATAR                           | Label: 13C(6)15N(2)(K)@ 1; Deamidated(N)@ 5; Label: 13C(6)15N(4)(R)@ 10                             | missed K-I@ 1                 | -0.00055115 | 1133.61548 | 567.815  | 1133.61597 | 567.815247 | 2 | 13 | 11.3485 | 17.19 |
| 43 | 19.36 | 21.5  | 48.2 RBM9_FlexIII    | 99.0 AVPPTAIPAYPGVVYQDGFYGADLYGGYAA YR    | Label: 13C(6)15N(4)(R)@ 32                                                                          |                               | 0.00240708  | 3391.64624 | 1131.556 | 3391.64282 | 1131.55493 | 3 | 20 | 17.1158 | 17.19 |
| 43 | 19.36 | 21.5  | 48.2 RBM9_FlexIII    | 99.0 AVPPTAIPAYPGVVYQDGFYGADLYGGYAA YR    | Label: 13C(6)15N(4)(R)@ 32                                                                          |                               | -0.00162122 | 3391.64014 | 1131.554 | 3391.64282 | 1131.55493 | 3 | 24 | 17.3813 | 17.19 |
| 43 | 19.36 | 21.5  | 48.2 RBM9_FlexIII    | 99.0 AVPPTAIPAYPGVVYQDGFYGADLYGGYAA YR    | Deamidated(Q)@ 16; Label: 13C(6)15N(4)(R)@ 32                                                       |                               | 0.0209129   | 3392.64819 | 849.1693 | 3392.62695 | 849.164002 | 4 | 20 | 17.1968 | 17.19 |
| 43 | 19.36 | 21.5  | 48.2 RBM9_FlexIII    | 99.0 AVPPTAIPAYPGVVYQDGFYGADLYGGYAA YR    | Deamidated(Q)@ 16; Label: 13C(6)15N(4)(R)@ 32                                                       |                               | 0.0163131   | 3392.64209 | 1131.888 | 3392.62695 | 1131.88294 | 3 | 19 | 18.1751 | 17.19 |
| 43 | 19.36 | 21.5  | 48.2 RBM9_FlexIII    | 99.0 AVPPTAIPAYPGVVYQDGFYGADLYGGYAA YR    | Deamidated(Q)@ 16; Label: 13C(6)15N(4)(R)@ 32                                                       |                               | 0.0163131   | 3392.64209 | 1131.888 | 3392.62695 | 1131.88294 | 3 | 18 | 16.8528 | 17.19 |
| 43 | 19.36 | 21.5  | 48.2 RBM9_FlexIII    | 99.0 AVPPTAIPAYPGVVYQDGFYGADLYGGYAA YR    | Deamidated(Q)@ 16; Label: 13C(6)15N(4)(R)@ 32                                                       |                               | 0.0209129   | 3392.64819 | 849.1693 | 3392.62695 | 849.164002 | 4 | 18 | 17.4572 | 17.19 |
| 43 | 19.36 | 21.5  | 48.2 RBM9_FlexIII    | 99.0 AVPPTAIPAYPGVVYQDGFYGADLYGGYAA YR    | Deamidated(Q)@ 16; Label: 13C(6)15N(4)(R)@ 32                                                       |                               | 0.0163131   | 3392.64209 | 1131.888 | 3392.62695 | 1131.88294 | 3 | 15 | 24.6834 | 17.19 |
| 43 | 19.36 | 21.5  | 48.2 RBM9_FlexIII    | 99.0 AVPPTAIPAYPGVVYQDGFYGADLYGGYAA YR    | Deamidated(Q)@ 16; Label: 13C(6)15N(4)(R)@ 32                                                       |                               | 0.0163131   | 3392.64209 | 1131.888 | 3392.62695 | 1131.88294 | 3 | 12 | 18.8242 | 17.19 |
| 43 | 19.36 | 21.5  | 48.2 RBM9_FlexIII    | 99.0 AVPPTAIPAYPGVVYQDGFYGADLYGGYAA YR    | Deamidated(Q)@ 16; Label: 13C(6)15N(4)(R)@ 32                                                       |                               | 0.0209129   | 3392.64819 | 849.1693 | 3392.62695 | 849.164002 | 4 | 16 | 16.9346 | 17.19 |
| 43 | 19.36 | 21.5  | 48.2 RBM9_FlexIII    | 99.0 AVPPTAIPAYPGVVYQDGFYGADLYGGYAA YR    | Label: 13C(6)15N(4)(R)@ 32                                                                          |                               | 0.0049317   | 3391.64819 | 848.9193 | 3391.64282 | 848.91803  | 4 | 15 | 18.0444 | 17.19 |
| 43 | 19.36 | 21.5  | 48.2 RBM9_FlexIII    | 99.0 AVPPTAIPAYPGVVYQDGFYGADLYGGYAA YR    | Deamidated(Q)@ 16; Label: 13C(6)15N(4)(R)@ 32                                                       |                               | 0.0163131   | 3392.64209 | 1131.888 | 3392.62695 | 1131.88294 | 3 | 14 | 24.4292 | 17.19 |
| 43 | 19.36 | 21.5  | 48.2 RBM9_FlexIII    | 99.0 KIEVNNATAR                           | Label: 13C(6)15N(2)(K)@ 1; Label: 13C(6)15N(4)(R)@ 10                                               | missed K-I@ 1                 | -0.0061564  | 1132.62585 | 567.3202 | 1132.63196 | 567.323242 | 2 | 12 | 11.0835 | 17.19 |
| 43 | 19.36 | 21.5  | 48.2 RBM9_FlexIII    | 99.0 LSPVGAIVGP ELYAASSFOADVSLGNDAAVPLSGR | Deamidated(Q)@ 20; Label: 13C(6)15N(4)(R)@ 36                                                       |                               | 0.0200943   | 3587.82227 | 1196.948 | 3587.80225 | 1196.94141 | 3 | 24 | 17.8512 | 17.19 |
| 43 | 19.36 | 21.5  | 48.2 RBM9_FlexIII    | 99.0 RLHVSNIFFR                           | Label: 13C(6)15N(4)(R)@ 1; Label: 13C(6)15N(4)(R)@ 10                                               | missed R-L@ 1                 | 0.00193115  | 1257.72278 | 420.2482 |            |            |   |    |         |       |

|    |       |       |                     |                                           |                                                                                   |                               |             |            |          |            |            |   |    |         |       |
|----|-------|-------|---------------------|-------------------------------------------|-----------------------------------------------------------------------------------|-------------------------------|-------------|------------|----------|------------|------------|---|----|---------|-------|
| 43 | 19.36 | 21.5  | 48.2 RBM9_FlexII    | 99.0 RLHVSNIFFR                           | Label: 13C(6)15N(4)(R)@ 1; Label: 13C(6)15N(4)(R)@ 10                             | missed R-L@ 1                 | 0.00916379  | 1257.72998 | 420.2506 | 1257.72095 | 420.247589 | 3 | 12 | 15.3727 | 17.19 |
| 43 | 19.36 | 21.5  | 48.2 RBM9_FlexII    | 99.0 RLHVSNIFFR                           | Label: 13C(6)15N(4)(R)@ 1; Label: 13C(6)15N(4)(R)@ 10                             | missed R-L@ 1                 | 0.00165649  | 1257.72253 | 420.2481 | 1257.72095 | 420.247589 | 3 | 12 | 17.2324 | 17.19 |
| 43 | 19.36 | 21.5  | 48.2 RBM9_FlexII    | 99.0 VYTADPYHALAPAASYGVGAVASLYR           | Label: 13C(6)15N(4)(R)@ 26                                                        |                               | -0.00584942 | 2692.34644 | 674.0939 | 2692.35254 | 674.095398 | 4 | 20 | 16.6884 | 17.19 |
| 43 | 19.36 | 21.5  | 48.2 RBM9_FlexII    | 99.0 VYTADPYHALAPAASYGVGAVASLYR           | Label: 13C(6)15N(4)(R)@ 18                                                        |                               | -0.00538332 | 2692.34717 | 898.4563 | 2692.35254 | 898.45813  | 3 | 28 | 16.7316 | 17.19 |
| 43 | 19.36 | 21.5  | 48.2 RBM9_FlexII    | 99.0 VYTADPYHALAPAASYGVGAVASLYR           | Label: 13C(6)15N(4)(R)@ 26                                                        |                               | 0.00029293  | 2692.35278 | 898.4582 | 2692.35254 | 898.45813  | 3 | 27 | 17.2769 | 17.19 |
| 43 | 19.36 | 21.5  | 48.2 RBM9_FlexII    | 99.0 VYTADPYHALAPAASYGVGAVASLYR           | Label: 13C(6)15N(4)(R)@ 26                                                        |                               | 0.00611343  | 2692.35864 | 674.0969 | 2692.35254 | 674.095398 | 4 | 19 | 16.9561 | 17.19 |
| 43 | 19.36 | 21.5  | 48.2 RBM9_FlexII    | 99.0 VYTADPYHALAPAASYGVGAVASLYR           | Label: 13C(6)15N(4)(R)@ 26                                                        |                               | 0.0030395   | 2692.35547 | 898.4591 | 2692.35254 | 898.45813  | 3 | 19 | 24.4994 | 17.19 |
| 43 | 19.36 | 21.5  | 48.2 RBM9_FlexII    | 99.0 VYTADPYHALAPAASYGVGAVASLYR           | Label: 13C(6)15N(4)(R)@ 26                                                        |                               | 0.0030395   | 2692.35547 | 898.4591 | 2692.35254 | 898.45813  | 3 | 18 | 17.8027 | 17.19 |
| 43 | 19.36 | 21.5  | 48.2 RBM9_FlexII    | 99.0 VYTADPYHALAPAASYGVGAVASLYR           | Label: 13C(6)15N(4)(R)@ 26                                                        |                               | -0.0222068  | 2692.33008 | 674.0898 | 2692.35254 | 674.095398 | 4 | 14 | 17.4822 | 17.19 |
| 43 | 19.36 | 21.5  | 48.2 RBM9_FlexII    | 99.0 VYTADPYHALAPAASYGVGAVASLYR           | Label: 13C(6)15N(4)(R)@ 26                                                        |                               | 0.0030395   | 2692.35547 | 898.4591 | 2692.35254 | 898.45813  | 3 | 11 | 18.4781 | 17.19 |
| 43 | 19.36 | 21.5  | 48.2 RBM9_FlexII    | 99.0 YPTFLYK                              | Label: 13C(6)15N(2)(K)@ 7                                                         | cleaved Y-Y@ N-term           | 0.00057017  | 938.499878 | 470.2572 | 938.499329 | 470.256928 | 2 | 9  | 15.0367 | 17.19 |
| 43 | 19.36 | 21.5  | 48.2 RBM9_FlexII    | 99.0 YPTFLYK                              | Label: 13C(6)15N(2)(K)@ 7                                                         | cleaved Y-Y@ N-term           | 0.00619955  | 938.507446 | 470.261  | 938.499329 | 470.256928 | 2 | 9  | 14.7754 | 17.19 |
| 43 | 19.36 | 21.5  | 48.2 RBM9_FlexII    | 99.0 YPTFLYK                              | Label: 13C(6)15N(2)(K)@ 7                                                         | cleaved Y-Y@ N-term           | 0.00073716  | 938.500061 | 470.2573 | 938.499329 | 470.256928 | 2 | 9  | 15.0782 | 17.19 |
| 43 | 19.36 | 21.5  | 48.2 RBM9_FlexII    | 99.0 YPTFLYK                              | Label: 13C(6)15N(2)(K)@ 7                                                         | cleaved Y-Y@ N-term           | 0.00092027  | 938.500244 | 470.2574 | 938.499329 | 470.256928 | 2 | 9  | 14.8156 | 17.19 |
| 44 | 18.26 | 22.53 | 46.7 TAX1BP3_FlexII | 99.0 AVQQSMLSYPYTFLYK                     |                                                                                   |                               | 0.00172303  | 1774.89832 | 888.4564 | 1774.89636 | 888.455444 | 2 | 19 | 16.2818 | 19.85 |
| 44 | 18.26 | 22.53 | 46.7 TAX1BP3_FlexII | 99.0 IMQVNGWDMTMVTHDQAR                   | Deamidated(N)@ 5                                                                  |                               | 0.00306932  | 2132.94727 | 711.9897 | 2132.94409 | 711.988648 | 3 | 16 | 15.2485 | 19.85 |
| 44 | 18.26 | 22.53 | 46.7 TAX1BP3_FlexII | 99.0 LLVTRQSLKQAVQQSMLSYPYTFLYK           | Label: 13C(6)15N(4)(R)@ 5; Label: 13C(6)15N(2)(K)@ 10; Label: 13C(6)15N(2)(K)@ 25 | missed R-Q@ 5; missed K-A@ 10 | 0.00269518  | 2967.64941 | 742.9196 | 2967.64648 | 742.918945 | 4 | 14 | 17.324  | 19.85 |
| 44 | 18.26 | 22.53 | 46.7 TAX1BP3_FlexII | 99.0 QGENLLIGFSIGGIDQDPSONPFSEDKTKD       | Deamidated(N)@ 4; Label: 13C(6)15N(2)(K)@ 28; Label: 13C(6)15N(2)(K)@ 31          | missed K-T @ 28               | 0.0131032   | 3322.59497 | 1108.539 | 3322.5813  | 1108.5343  | 3 | 11 | 16.708  | 19.85 |
| 44 | 18.26 | 22.53 | 46.7 TAX1BP3_FlexII | 99.0 RSEEVVR                              | Label: 13C(6)15N(4)(R)@ 1; Label: 13C(6)15N(4)(R)@ 7                              | missed R-S@ 1                 | 0.00106893  | 893.484497 | 447.7495 | 893.483337 | 447.748962 | 2 | 10 | 8.7425  | 19.85 |
| 44 | 18.26 | 22.53 | 46.7 TAX1BP3_FlexII | 99.0 SEEVVR                               | Label: 13C(6)15N(4)(R)@ 6                                                         |                               | -0.00734762 | 727.366699 | 364.6906 | 727.373962 | 364.694275 | 2 | 7  | 9.5676  | 19.85 |
| 44 | 18.26 | 22.53 | 46.7 TAX1BP3_FlexII | 99.0 TDKGIYVTR                            | Label: 13C(6)15N(2)(K)@ 3; Label: 13C(6)15N(4)(R)@ 9                              | missed K-G@ 3                 | -0.00294962 | 1069.58569 | 535.8001 | 1069.58862 | 535.801636 | 2 | 14 | 11.841  | 19.85 |
| 44 | 18.26 | 22.53 | 46.7 TAX1BP3_FlexII | 99.0 VSEGGPAEIAIGLOIGDK                   |                                                                                   |                               | -0.00255041 | 1639.84424 | 820.9294 | 1639.84168 | 820.928162 | 2 | 22 | 14.9131 | 19.85 |
| 44 | 18.26 | 22.53 | 46.7 TAX1BP3_FlexII | 99.0 VSEGGPAEIAIGLOIGDKIMQVNGWDMTMVTHDQAR | Label: 13C(6)15N(2)(K)@ 17; Label: 13C(6)15N(4)(R)@ 35                            | missed K-I@ 17                | -0.00516844 | 3771.80859 | 943.9594 | 3771.81372 | 943.960693 | 4 | 17 | 17.391  | 19.85 |
| 44 | 18.26 | 22.53 | 46.7 TAX1BP3_FlexII | 99.0 AVQQSMLSYPYTFLYK                     | Label: 13C(6)15N(2)(K)@ 15                                                        |                               | -0.00243282 | 1782.9082  | 595.31   | 1782.91065 | 595.310791 | 3 | 13 | 15.5412 | 19.85 |
| 44 | 18.26 | 22.53 | 46.7 TAX1BP3_FlexII | 99.0 AVQQSMLSYPYTFLYK                     | Oxidation(M)@ 6; Label: 13C(6)15N(2)(K)@ 15                                       |                               | -0.0159311  | 1798.90393 | 900.4592 | 1798.90552 | 900.460022 | 2 | 17 | 15.7029 | 19.85 |
| 44 | 18.26 | 22.53 | 46.7 TAX1BP3_FlexII | 99.0 AVQQSMLSYPYTFLYK                     | Label: 13C(6)15N(2)(K)@ 15                                                        |                               | 0.00410495  | 1782.91467 | 892.4646 | 1782.91065 | 892.462585 | 2 | 20 | 16.1511 | 19.85 |
| 44 | 18.26 | 22.53 | 46.7 TAX1BP3_FlexII | 99.0 AVQQSMLSYPYTFLYK                     | Label: 13C(6)15N(2)(K)@ 15                                                        |                               | -0.00243282 | 1782.9082  | 595.31   | 1782.91065 | 595.310791 | 3 | 17 | 16.1646 | 19.85 |
| 44 | 18.26 | 22.53 | 46.7 TAX1BP3_FlexII | 99.0 AVQQSMLSYPYTFLYK                     |                                                                                   |                               | 0.00183808  | 1774.89819 | 592.64   | 1774.89636 | 592.639404 | 3 | 14 | 16.3476 | 19.85 |
| 44 | 18.26 | 22.53 | 46.7 TAX1BP3_FlexII | 99.0 AVQQSMLSYPYTFLYK                     | Label: 13C(6)15N(2)(K)@ 15                                                        |                               | -0.00053371 | 1782.91003 | 892.4623 | 1782.91065 | 892.462585 | 2 | 19 | 16.4173 | 19.85 |
| 44 | 18.26 | 22.53 | 46.7 TAX1BP3_FlexII | 99.0 AVQQSMLSYPYTFLYK                     | Label: 13C(6)15N(2)(K)@ 15                                                        |                               | 0.00232791  | 1782.91296 | 595.3116 | 1782.91065 | 595.310791 | 3 | 16 | 16.4418 | 19.85 |
| 44 | 18.26 | 22.53 | 46.7 TAX1BP3_FlexII | 99.0 AVQQSMLSYPYTFLYK                     | Label: 13C(6)15N(2)(K)@ 15                                                        |                               | -0.00663721 | 1782.90393 | 892.4592 | 1782.91065 | 892.462585 | 2 | 18 | 16.6921 | 19.85 |
| 44 | 18.26 | 22.53 | 46.7 TAX1BP3_FlexII | 99.0 AVQQSMLSYPYTFLYK                     | Label: 13C(6)15N(2)(K)@ 15                                                        |                               | -0.00663721 | 1782.90393 | 892.4592 | 1782.91065 | 892.462585 | 2 | 18 | 16.9611 | 19.85 |
| 44 | 18.26 | 22.53 | 46.7 TAX1BP3_FlexII | 99.0 AVQQSMLSYPYTFLYK                     | Deamidated(Q)@ 4; Label: 13C(6)15N(2)(K)@ 15                                      |                               | 0.00934463  | 1783.90393 | 892.9592 | 1783.89465 | 892.95459  | 2 | 13 | 17.2341 | 19.85 |
| 44 | 18.26 | 22.53 | 46.7 TAX1BP3_FlexII | 99.0 AVQQSMLSYPYTFLYK                     | Deamidated(Q)@ 4; Label: 13C(6)15N(2)(K)@ 15                                      |                               | 0.00934463  | 1783.90393 | 892.9592 | 1783.89465 | 892.95459  | 2 | 12 | 17.5053 | 19.85 |
| 44 | 18.26 | 22.53 | 46.7 TAX1BP3_FlexII | 99.0 AVQQSMLSYPYTFLYK                     | Deamidated(Q)@ 4; Label: 13C(6)15N(2)(K)@ 15                                      |                               | 0.00934463  | 1783.90393 | 892.9592 | 1783.89465 | 892.95459  | 2 | 11 | 18.1289 | 19.85 |
| 44 | 18.26 | 22.53 | 46.7 TAX1BP3_FlexII | 99.0 AVQQSMLSYPYTFLYK                     | Deamidated(Q)@ 4; Label: 13C(6)15N(2)(K)@ 15                                      |                               | 0.00934463  | 1783.90393 | 892.9592 | 1783.89465 | 892.95459  | 2 | 10 | 18.9037 | 19.85 |
| 44 | 18.26 | 22.53 | 46.7 TAX1BP3_FlexII | 99.0 AVQQSMLSYPYTFLYK                     | Label: 13C(6)15N(2)(K)@ 15                                                        |                               | -0.00663721 | 1782.90393 | 892.4592 | 1782.91065 | 892.462585 | 2 | 11 | 19.2023 | 19.85 |
| 44 | 18.26 | 22.53 | 46.7 TAX1BP3_FlexII | 99.0 IMQVNGWDMTMVTHDQAR                   | Deamidated(N)@ 5; Oxidation(M)@ 9; Label: 13C(6)15N(4)(R)@ 18                     |                               | 0.00976744  | 2158.95728 | 720.6597 | 2158.94727 | 720.656372 | 3 | 11 | 14.6491 | 19.85 |
| 44 | 18.26 | 22.53 | 46.7 TAX1BP3_FlexII | 99.0 IMQVNGWDMTMVTHDQAR                   | Deamidated(N)@ 5; Label: 13C(6)15N(4)(R)@ 18                                      |                               | 0.0148552   | 2142.96729 | 715.3297 | 2142.95239 | 715.324768 | 3 | 16 | 15.2025 | 19.85 |
| 44 | 18.26 | 22.53 | 46.7 TAX1BP3_FlexII | 99.0 IMQVNGWDMTMVTHDQAR                   | Deamidated(N)@ 5; Label: 13C(6)15N(4)(R)@ 18                                      |                               | 0.0105287   | 2142.96338 | 1072.489 | 2142.95239 | 1072.48352 | 2 | 19 | 15.2223 | 19.85 |
| 44 | 18.26 | 22.53 | 46.7 TAX1BP3_FlexII | 99.0 IMQVNGWDMTMVTHDQAR                   | Deamidated(N)@ 5; Label: 13C(6)15N(4)(R)@ 18                                      |                               | 0.0148552   | 2142.96729 | 715.3297 | 2142.95239 | 715.324768 | 3 | 16 | 15.4595 | 19.85 |
| 44 | 18.26 | 22.53 | 46.7 TAX1BP3_FlexII | 99.0 IMQVNGWDMTMVTHDQAR                   | Deamidated(N)@ 5; Label: 13C(6)15N(4)(R)@ 18                                      |                               | -0.00949078 | 2142.94336 | 1072.479 | 2142.95239 | 1072.48352 | 2 | 22 | 15.4826 | 19.85 |
| 44 | 18.26 | 22.53 | 46.7 TAX1BP3_FlexII | 99.0 IMQVNGWDMTMVTHDQAR                   | Deamidated(N)@ 5; Label: 13C(6)15N(4)(R)@ 18                                      |                               | 0.0148552   | 2142.96729 | 715.3297 | 2142.95239 | 715.324768 | 3 | 17 | 15.9862 | 19.85 |
| 44 | 18.26 | 22.53 | 46.7 TAX1BP3_FlexII | 99.0 IMQVNGWDMTMVTHDQAR                   | Deamidated(N)@ 5; Label: 13C(6)15N(4)(R)@ 18                                      |                               | 0.0148552   | 2142.96729 | 715.3297 | 2142.95239 | 715.324768 | 3 | 15 | 16.3739 | 19.85 |
| 44 | 18.26 | 22.53 | 46.7 TAX1BP3_FlexII | 99.0 IMQVNGWDMTMVTHDQAR                   | Deamidated(N)@ 5; Label: 13C(6)15N(4)(R)@ 18                                      |                               | 0.0148552   | 2142.96729 | 715.3297 | 2142.95239 | 715.324768 | 3 | 12 | 16.8664 | 19.85 |
| 44 | 18.26 | 22.53 | 46.7 TAX1BP3_FlexII | 99.0 IMQVNGWDMTMVTHDQAR                   | Deamidated(N)@ 5; Label: 13C(6)15N(4)(R)@ 18                                      |                               | 0.0148552   | 2142.96729 | 715.3297 | 2142.95239 | 715.324768 | 3 | 13 | 17.7823 | 19.85 |
| 44 | 18.26 | 22.53 | 46.7 TAX1BP3_FlexII | 99.0 IMQVNGWDMTMVTHDQAR                   | Deamidated(N)@ 5; Label: 13C(6)15N(4)(R)@ 18                                      |                               | 0.0148552   | 2142.96729 | 715.3297 | 2142.95239 | 715.324768 | 3 | 10 | 18.1966 | 19.85 |
| 44 | 18.26 | 22.53 | 46.7 TAX1BP3_FlexII | 99.0 IMQVNGWDMTMVTHDQAR                   | Deamidated(N)@ 5; Label: 13C(6)15N(4)(R)@ 18                                      |                               | 0.0148552   | 2142.96729 | 715.3297 | 2142.95239 | 715.324768 | 3 | 11 | 18.6014 | 19.85 |
| 44 | 18.26 | 22.53 | 46.7 TAX1BP3_FlexII | 99.0 IMQVNGWDMTMVTHDQAR                   | Deamidated(N)@ 5; Label: 13C(6)15N(4)(R)@ 18                                      |                               | 0.0148552   | 2142.96729 | 715.3297 | 2142.95239 | 715.324768 | 3 | 14 | 24.5249 | 19.85 |
| 44 | 18.26 | 22.53 | 46.7 TAX1BP3_FlexII | 99.0 IMQVNGWDMTMVTHDQAR                   | Label: 13C(6)15N(4)(R)@ 18                                                        |                               | 0.00882202  | 2141.9773  | 714.9997 | 2141.96851 | 714.996765 | 3 | 9  | 24.8115 | 19.85 |
| 44 | 18.26 | 22.53 | 46.7 TAX1BP3_FlexII | 99.0 IMQVNGWDMTMVTHDQAR                   | Deamidated(N)@ 5; Label: 13C(6)15N(4)(R)@ 18                                      |                               | 0.0148552   | 2142.96729 | 715.3297 | 2142.95239 | 715.324768 | 3 | 9  | 25.341  | 19.85 |
| 44 | 18.26 | 22.53 | 46.7 TAX1BP3_FlexII | 99.0 IMQVNGWDMTMVTHDQAR                   | Deamidated(N)@ 5; Label: 13C(6)15N(4)(R)@ 18                                      |                               | 0.0148552   | 2142.96729 | 715.3297 | 2142.95239 | 715.324768 | 3 | 7  | 26.1221 | 19.85 |
| 44 | 18.26 | 22.53 | 46.7 TAX1BP3_FlexII | 99.0 IMQVNGWDMTMVTHDQAR                   | Label: 13C(6)15N(4)(R)@ 18                                                        |                               | 0.00882202  | 2141.9773  | 714.9997 | 2141.96851 | 714.996765 | 3 | 6  | 26.4115 | 19.85 |
| 44 | 18.26 | 22.53 | 46.7 TAX1BP3_FlexII | 99.0 LSYPTFLYK                            | Label: 13C(6)15N(2)(K)@ 9                                                         | cleaved M-L@ N-term           | 0.00256272  | 1138.61804 | 570.3163 | 1138.61536 | 570.315002 | 2 | 9  | 16.404  | 19.85 |
| 44 | 18.26 | 22.53 | 46.7 TAX1BP3_FlexII | 99.0 RSEEVVR                              | Label: 13C(6)15N(4)(R)@ 1; Label: 13C(6)15N(4)(R)@ 7                              | missed R-S@ 1                 | 0.00283894  | 893.486267 | 447.7504 | 893.483337 | 447.748962 | 2 | 9  | 7.889   | 19.85 |
| 44 | 18.26 | 22.53 | 46.7 TAX1BP3_FlexII | 99.0 RSEEVVR                              | Label: 13C(6)15N(4)(R)@ 1; Label: 13C(6)15N(4)(R)@ 7                              | missed R-S@ 1                 | 0.00283894  | 893.486267 | 447.7504 | 893.483337 | 447.748962 | 2 | 11 | 8.1605  | 19.85 |
| 44 | 18.26 | 22.53 | 46.7 TAX1BP3_FlexII | 99.0 RSEEVVR                              | Label: 13C(6)15N(4)(R)@ 1; Label: 13C(6)15N(4)(R)@ 7                              | missed R-S@ 1                 | 0.00283894  | 893.486267 | 447.7504 | 893.483337 | 447.748962 | 2 | 11 | 8.4197  | 19.85 |
| 44 | 18.26 | 22.53 | 46.7 TAX1BP3_FlexII | 99.0 SEEVVR                               | Label: 13C(6)15N(4)(R)@ 6                                                         |                               | 0.00107521  | 727.375061 | 364.6948 | 727.373962 | 364.694275 | 2 | 7  | 9.3051  | 19.85 |
| 44 | 18.26 | 22.53 | 46.7 TAX1BP3_FlexII | 99.0 SEEVVR                               | Label: 13C(6)15N(4)(R)@ 6                                                         |                               | -0.00734762 | 72         |          |            |            |   |    |         |       |

|     |       |       |                      |                                          |                                                                                                                                |                                 |             |            |          |            |            |   |    |         |       |
|-----|-------|-------|----------------------|------------------------------------------|--------------------------------------------------------------------------------------------------------------------------------|---------------------------------|-------------|------------|----------|------------|------------|---|----|---------|-------|
| 44  | 18.26 | 22.53 | 46.7 TAX1BP3_FlexIII | 99.0 VSEGGPAEIAAGLOIGDK                  | Label: 13C(6)15N(2)(K) @ 17                                                                                                    |                                 | 0.00835028  | 1647.86426 | 824.9394 | 1647.85596 | 824.935242 | 2 | 16 | 15.682  | 19.85 |
| 44  | 18.26 | 22.53 | 46.7 TAX1BP3_FlexIII | 99.0 VSEGGPAEIAAGLOIGDK                  | Label: 13C(6)15N(2)(K) @ 17                                                                                                    |                                 | -0.0116692  | 1647.84424 | 824.9294 | 1647.85596 | 824.935242 | 2 | 12 | 18.7129 | 19.85 |
| 44  | 18.26 | 22.53 | 46.7 TAX1BP3_FlexIII | 99.0 VSEGGPAEIAAGLOIGDK                  | Label: 13C(6)15N(2)(K) @ 17                                                                                                    |                                 | 0.00090401  | 1647.85693 | 824.9357 | 1647.85596 | 824.935242 | 2 | 17 | 24.3967 | 19.85 |
| 44  | 18.26 | 22.53 | 46.7 TAX1BP3_FlexIII | 99.0 VSEGGPAEIAAGLOIGDK                  | Label: 13C(6)15N(2)(K) @ 17                                                                                                    |                                 | -0.0116692  | 1647.84424 | 824.9294 | 1647.85596 | 824.935242 | 2 | 10 | 25.0033 | 19.85 |
| 44  | 18.26 | 22.53 | 46.7 TAX1BP3_FlexIII | 99.0 VSEGGPAEIAAGLOIGDK                  | Label: 13C(6)15N(2)(K) @ 17                                                                                                    |                                 | 0.00835028  | 1647.86426 | 824.9394 | 1647.85596 | 824.935242 | 2 | 5  | 26.1494 | 19.85 |
| 44  | 18.26 | 22.53 | 46.7 TAX1BP3_FlexIII | 99.0 VSEGGPAEIAAGLOIGDKIMQVNGWDMTMTVDQAR | Deamidated(Q) @ 13; Label: 13C(6)15N(2)(K) @ 17; Label: 13C(6)15N(4)(R) @ 35                                                   | missed K-I @ 17                 | 0.0352344   | 3772.83228 | 1258.618 | 3772.79785 | 1258.60657 | 3 | 17 | 17.3372 | 19.85 |
| 44  | 18.26 | 22.53 | 46.7 TAX1BP3_FlexIII | 99.0 YPTFLYK                             | Label: 13C(6)15N(2)(K) @ 7                                                                                                     | cleaved S-Y @ N-term            | 0.00057017  | 938.499878 | 470.2572 | 938.499329 | 470.256928 | 2 | 9  | 15.0367 | 19.85 |
| 44  | 18.26 | 22.53 | 46.7 TAX1BP3_FlexIII | 99.0 YPTFLYK                             | Label: 13C(6)15N(2)(K) @ 7                                                                                                     | cleaved S-Y @ N-term            | 0.00819955  | 938.507446 | 470.261  | 938.499329 | 470.256928 | 2 | 9  | 14.7754 | 19.85 |
| 44  | 18.26 | 22.53 | 46.7 TAX1BP3_FlexIII | 99.0 YPTFLYK                             | Label: 13C(6)15N(2)(K) @ 7                                                                                                     | cleaved S-Y @ N-term            | 0.00073716  | 938.500061 | 470.2573 | 938.499329 | 470.256928 | 2 | 9  | 15.0782 | 19.85 |
| 44  | 18.26 | 22.53 | 46.7 TAX1BP3_FlexIII | 99.0 YPTFLYK                             | Label: 13C(6)15N(2)(K) @ 7                                                                                                     | cleaved S-Y @ N-term            | 0.00092027  | 938.500244 | 470.2574 | 938.499329 | 470.256928 | 2 | 9  | 14.8156 | 19.85 |
| 47  | 17.57 | 21.46 | 54.3 KLRC4_FlexIII   | 99.0 GTYSEVSLAQDPK                       | Label: 13C(6)15N(2)(K) @ 13                                                                                                    |                                 | -0.00099725 | 1401.68591 | 701.8502 | 1401.68677 | 701.850647 | 2 | 13 | 13.5293 | 15.01 |
| 47  | 17.57 | 21.46 | 54.3 KLRC4_FlexIII   | 99.0 GTYSEVSLAQDPKR                      | Label: 13C(6)15N(2)(K) @ 13; Label: 13C(6)15N(4)(R) @ 14                                                                       | missed K-R @ 13                 | -0.00232473 | 1567.79382 | 784.9042 | 1567.79614 | 784.905335 | 2 | 17 | 12.7411 | 15.01 |
| 47  | 17.57 | 21.46 | 54.3 KLRC4_FlexIII   | 99.0 HCGHCPPEEWITYSNSCYYGK               | Propionamide(C) @ 2; Propionamide(C) @ 5; Propionamide(C) @ 16; Label: 13C(6)15N(2)(K) @ 21                                    |                                 | -0.0208225  | 2710.12866 | 678.5394 | 2710.14941 | 678.544617 | 4 | 18 | 14.8915 | 15.01 |
| 47  | 17.57 | 21.46 | 54.3 KLRC4_FlexIII   | 99.0 ISISGTKQEIFOVELNLQNASSDHQGNDK       | Label: 13C(6)15N(2)(K) @ 7; Deamidated(N) @ 16; Label: 13C(6)15N(2)(K) @ 29                                                    | missed K-Q @ 7                  | 0.018703    | 3216.60523 | 1073.209 | 3216.58691 | 1073.20288 | 3 | 16 | 16.1899 | 15.01 |
| 47  | 17.57 | 21.46 | 54.3 KLRC4_FlexIII   | 99.0 QRGTYSEVSLAQDPK                     | Label: 13C(6)15N(2)(K) @ 2; Label: 13C(6)15N(2)(K) @ 15                                                                        | missed R-G @ 2                  | -0.00803217 | 1695.84668 | 566.2895 | 1695.85474 | 566.292175 | 3 | 14 | 12.7593 | 15.01 |
| 47  | 17.57 | 21.46 | 54.3 KLRC4_FlexIII   | 99.0 QRGTYSEVSLAQDPKR                    | Gln->pyro-Glu @ N-term; Label: 13C(6)15N(2)(K) @ 15; Label: 13C(6)15N(4)(R) @ 16                                               | missed R-G @ 2; missed K-R @ 15 | -0.0190412  | 1844.93555 | 615.9858 | 1844.9375  | 615.98645  | 3 | 16 | 12.9919 | 15.01 |
| 47  | 17.57 | 21.46 | 54.3 KLRC4_FlexIII   | 99.0 RTLCFLYPTFLYK                       | Label: 13C(6)15N(4)(R) @ 1; Propionamide(C) @ 5; Label: 13C(6)15N(2)(K) @ 14                                                   | missed R-T @ 1                  | 0.0134023   | 1866.03662 | 623.0195 | 1866.02332 | 623.015015 | 3 | 15 | 17.745  | 15.01 |
| 47  | 17.57 | 21.46 | 54.3 KLRC4_FlexIII   | 99.0 RTLCFLYPTFLYK                       | Propionamide(C) @ 2; Label: 13C(6)15N(2)(K) @ 13                                                                               |                                 | -0.00011371 | 1699.91382 | 850.9642 | 1699.91394 | 850.964233 | 2 | 11 | 18.0078 | 15.01 |
| 47  | 17.57 | 21.46 | 54.3 KLRC4_FlexIII   | 99.0 ISISGTKQEIFOVELNLQNASSDHQGNDKTYHCK  | Label: 13C(6)15N(2)(K) @ 7; Deamidated(N) @ 19; Label: 13C(6)15N(2)(K) @ 29; Propionamide(C) @ 33; Label: 13C(6)15N(2)(K) @ 34 | missed K-Q @ 7; missed K-T @ 29 | 0.00059822  | 3927.91284 | 655.6594 | 3927.91235 | 655.659363 | 6 | 11 | 16.3984 | 15.01 |
| 47  | 17.57 | 21.46 | 54.3 KLRC4_FlexIII   | 99.0 GTYSEVSLAQDPK                       | Label: 13C(6)15N(2)(K) @ 13                                                                                                    |                                 | -0.00063104 | 1401.68604 | 701.8503 | 1401.68677 | 701.850647 | 2 | 16 | 13.2581 | 15.01 |
| 47  | 17.57 | 21.46 | 54.3 KLRC4_FlexIII   | 99.0 GTYSEVSLAQDPK                       | Label: 13C(6)15N(2)(K) @ 13                                                                                                    |                                 | 0.0101423   | 1401.6969  | 468.2396 | 1401.68677 | 468.236176 | 3 | 12 | 13.3389 | 15.01 |
| 47  | 17.57 | 21.46 | 54.3 KLRC4_FlexIII   | 99.0 GTYSEVSLAQDPKR                      | Label: 13C(6)15N(2)(K) @ 13; Label: 13C(6)15N(4)(R) @ 14                                                                       | missed K-R @ 13                 | 0.0106458   | 1567.80664 | 523.6095 | 1567.79614 | 523.605957 | 3 | 12 | 12.7219 | 15.01 |
| 47  | 17.57 | 21.46 | 54.3 KLRC4_FlexIII   | 99.0 HCGHCPPEEWITYSNSCYYGK               | Propionamide(C) @ 2; Propionamide(C) @ 5; Propionamide(C) @ 16; Label: 13C(6)15N(2)(K) @ 21                                    |                                 | -0.00080294 | 2710.14844 | 678.5444 | 2710.14941 | 678.544617 | 4 | 19 | 14.6288 | 15.01 |
| 47  | 17.57 | 21.46 | 54.3 KLRC4_FlexIII   | 99.0 HCGHCPPEEWITYSNSCYYGK               | Label: 13C(6)15N(2)(K) @ 2; Propionamide(C) @ 5; Deamidated(N) @ 14; Propionamide(C) @ 16; Label: 13C(6)15N(2)(K) @ 21         |                                 | 0.00257652  | 2711.13599 | 904.7193 | 2711.13355 | 904.718445 | 3 | 15 | 14.6323 | 15.01 |
| 47  | 17.57 | 21.46 | 54.3 KLRC4_FlexIII   | 99.0 HCGHCPPEEWITYSNSCYYGK               | Propionamide(C) @ 2; Propionamide(C) @ 5; Deamidated(N) @ 14; Propionamide(C) @ 16; Label: 13C(6)15N(2)(K) @ 21                |                                 | 0.0300112   | 2711.16333 | 1356.589 | 2711.13355 | 1356.57398 | 2 | 20 | 14.6806 | 15.01 |
| 47  | 17.57 | 21.46 | 54.3 KLRC4_FlexIII   | 99.0 HCGHCPPEEWITYSNSCYYGK               | Propionamide(C) @ 2; Propionamide(C) @ 5; Deamidated(N) @ 14; Propionamide(C) @ 16; Label: 13C(6)15N(2)(K) @ 21                |                                 | 0.00257652  | 2711.13599 | 904.7193 | 2711.13355 | 904.718445 | 3 | 16 | 14.8937 | 15.01 |
| 47  | 17.57 | 21.46 | 54.3 KLRC4_FlexIII   | 99.0 HCGHCPPEEWITYSNSCYYGK               | Propionamide(C) @ 2; Propionamide(C) @ 5; Propionamide(C) @ 16; Label: 13C(6)15N(2)(K) @ 21                                    |                                 | -0.00470919 | 2710.14502 | 678.5435 | 2710.14941 | 678.544617 | 4 | 17 | 15.201  | 15.01 |
| 47  | 17.57 | 21.46 | 54.3 KLRC4_FlexIII   | 99.0 ISISGTKQEIFOVELNLQNASSDHQGNDK       | Label: 13C(6)15N(2)(K) @ 7; Deamidated(N) @ 16; Label: 13C(6)15N(2)(K) @ 29                                                    | missed K-Q @ 7                  | 0.0212976   | 3216.60864 | 805.1594 | 3216.58691 | 805.153992 | 4 | 13 | 15.9498 | 15.01 |
| 47  | 17.57 | 21.46 | 54.3 KLRC4_FlexIII   | 99.0 LYPTFLYK                            | Label: 13C(6)15N(2)(K) @ 8                                                                                                     | cleaved F-L @ N-term            | -0.00022118 | 1051.58313 | 526.7988 | 1051.58337 | 526.79895  | 2 | 9  | 15.3795 | 15.01 |
| 47  | 17.57 | 21.46 | 54.3 KLRC4_FlexIII   | 99.0 QRGTYSEVSLAQDPKR                    | Label: 13C(6)15N(4)(R) @ 2; Label: 13C(6)15N(2)(K) @ 15; Label: 13C(6)15N(4)(R) @ 16                                           | missed R-G @ 2; missed K-R @ 15 | 0.00513678  | 1861.96936 | 466.4996 | 1861.96411 | 466.498291 | 4 | 12 | 12.3265 | 15.01 |
| 47  | 17.57 | 21.46 | 54.3 KLRC4_FlexIII   | 99.0 TLCLFYPTFLYK                        | Propionamide(C) @ 4; Label: 13C(6)15N(2)(K) @ 13                                                                               |                                 | -0.00214701 | 1699.91162 | 850.9631 | 1699.91394 | 850.964233 | 2 | 13 | 18.1244 | 15.01 |
| 47  | 17.57 | 21.46 | 54.3 KLRC4_FlexIII   | 99.0 TLCLFYPTFLYK                        | Propionamide(C) @ 9; Label: 13C(6)15N(2)(K) @ 13                                                                               |                                 | -0.0171305  | 1699.89673 | 567.6395 | 1699.91394 | 567.645264 | 3 | 11 | 17.9243 | 15.01 |
| 47  | 17.57 | 21.46 | 54.3 KLRC4_FlexIII   | 99.0 YPTFLYK                             | Label: 13C(6)15N(2)(K) @ 7                                                                                                     | cleaved L-Y @ N-term            | 0.00057017  | 938.499878 | 470.2572 | 938.499329 | 470.256928 | 2 | 9  | 15.0367 | 15.01 |
| 47  | 17.57 | 21.46 | 54.3 KLRC4_FlexIII   | 99.0 YPTFLYK                             | Label: 13C(6)15N(2)(K) @ 7                                                                                                     | cleaved N-Y @ N-term            | 0.00819955  | 938.507446 | 470.261  | 938.499329 | 470.256928 | 2 | 9  | 14.7754 | 15.01 |
| 47  | 17.57 | 21.46 | 54.3 KLRC4_FlexIII   | 99.0 YPTFLYK                             | Label: 13C(6)15N(2)(K) @ 7                                                                                                     | cleaved L-Y @ N-term            | 0.00073716  | 938.500061 | 470.2573 | 938.499329 | 470.256928 | 2 | 9  | 15.0782 | 15.01 |
| 47  | 17.57 | 21.46 | 54.3 KLRC4_FlexIII   | 99.0 YPTFLYK                             | Label: 13C(6)15N(2)(K) @ 7                                                                                                     | cleaved L-Y @ N-term            | 0.00092027  | 938.500244 | 470.2574 | 938.499329 | 470.256928 | 2 | 9  | 14.8156 | 15.01 |
| 171 | 0.42  | 2.52  | 65.0 HIF1AN_FlexIII  | 99.0 YPTFLYK                             | Label: 13C(6)15N(2)(K) @ 7                                                                                                     | cleaved N-Y @ N-term            | 0.00057017  | 938.499878 | 470.2572 | 938.499329 | 470.256928 | 2 | 9  | 15.0367 | 25.53 |
| 171 | 0.42  | 2.52  | 65.0 HIF1AN_FlexIII  | 99.0 YPTFLYK                             | Label: 13C(6)15N(2)(K) @ 7                                                                                                     | cleaved N-Y @ N-term            | 0.00819955  | 938.507446 | 470.261  | 938.499329 | 470.256928 | 2 | 9  | 14.7754 | 25.53 |
| 171 | 0.42  | 2.52  | 65.0 HIF1AN_FlexIII  | 99.0 YPTFLYK                             | Label: 13C(6)15N(2)(K) @ 7                                                                                                     | cleaved N-Y @ N-term            | 0.00073716  | 938.500061 | 470.2573 | 938.499329 | 470.256928 | 2 | 9  | 15.0782 | 25.53 |
| 171 | 0.42  | 2.52  | 65.0 HIF1AN_FlexIII  | 99.0 YPTFLYK                             | Label: 13C(6)15N(2)(K) @ 7                                                                                                     | cleaved N-Y @ N-term            | 0.00092027  | 938.500244 | 470.2574 | 938.499329 | 470.256928 | 2 | 9  | 14.8156 | 25.53 |
| 231 | 0.05  | 2.09  | 56.1 CDC25C_FlexIII  | 99.0 YPTFLYK                             | Label: 13C(6)15N(2)(K) @ 7                                                                                                     | cleaved P-Y @ N-term            | 0.00057017  | 938.499878 | 470.2572 | 938.499329 | 470.256928 | 2 | 9  | 15.0367 | 33.74 |
| 231 | 0.05  | 2.09  | 56.1 CDC25C_FlexIII  | 99.0 YPTFLYK                             | Label: 13C(6)15N(2)(K) @ 7                                                                                                     | cleaved P-Y @ N-term            | 0.00819955  | 938.507446 | 470.261  | 938.499329 | 470.256928 | 2 | 9  | 14.7754 | 33.74 |
| 231 | 0.05  | 2.09  | 56.1 CDC25C_FlexIII  | 99.0 YPTFLYK                             | Label: 13C(6)15N(2)(K) @ 7                                                                                                     | cleaved P-Y @ N-term            | 0.00073716  | 938.500061 | 470.2573 | 938.499329 | 470.256928 | 2 | 9  | 15.0782 | 33.74 |
| 231 | 0.05  | 2.09  | 56.1 CDC25C_FlexIII  | 99.0 YPTFLYK                             | Label: 13C(6)15N(2)(K) @ 7                                                                                                     | cleaved P-Y @ N-term            | 0.00092027  | 938.500244 | 470.2574 | 938.499329 | 470.256928 | 2 | 9  | 14.8156 | 33.74 |
| 1   | 72.6  | 72.6  | 57.2 ZAP70_FlexIII   | 99.0 ALGADDSYYTAR                        | Label: 13C(6)15N(4)(R) @ 12                                                                                                    |                                 | -0.00040301 | 1311.5968  | 438.2062 | 1311.59705 | 438.206299 | 3 | 10 | 12.4872 | 34.38 |
| 6   | 55.92 | 58    | 59.7 MAPK10_FlexIII  | 99.0 HKILFPGR                            | Label: 13C(6)15N(2)(K) @ 2; Label: 13C(6)15N(4)(R) @ 8                                                                         | missed K-I @ 2                  | 0.00905585  | 984.607849 | 329.2099 | 984.598816 | 329.206879 | 3 | 9  | 12.5034 | 7.35  |
| 13  | 39.97 | 41.97 | 60.7 TREM1_FlexIII   | 99.0 ALCPLYTSPR                          | Propionamide(C) @ 3; Label: 13C(6)15N(4)(R) @ 10                                                                               |                                 | 0.00034635  | 1200.62048 | 401.2141 | 1200.62    | 401.213959 | 3 | 10 | 13.2191 | 38.93 |
| 17  | 34.24 | 36.26 | 47.8 SFRP4_FlexIII   | 99.0 GKPPAPKSPASK                        | Label: 13C(6)15N(2)(K) @ 2; Label: 13C(6)15N(2)(K) @ 7; Label: 13C(6)15N(2)(K) @ 12                                            |                                 | -0.00130814 | 1197.72815 | 400.25   | 1197.72991 | 400.250458 | 3 | 11 | 7.4143  | 3.71  |
| 43  | 19.36 | 21.5  | 48.2 RBM9_FlexIII    | 99.0 RLHVSNIPIR                          | Label: 13C(6)15N(4)(R) @ 1; Label: 13C(6)15N(4)(R) @ 10                                                                        | missed R-L @ 1                  | -0.0027602  | 1257.71802 | 629.8663 | 1257.72065 | 629.867737 | 2 | 11 | 13.4655 | 17.19 |
| 7   | 55.61 | 59.66 | 62.8 HCFC1_FlexIII   | 99.0 DLWYLETEKPPPPAR                     | Label: 13C(6)15N(2)(K) @ 9; Label: 13C(6)15N(4)(R) @ 15                                                                        |                                 | 0.0098025   | 1828.95789 | 610.6599 | 1828.94788 | 610.656555 | 3 | 8  | 24.5591 | 10.99 |
| 24  | 27.17 | 29.2  | 66.8 ICOSLG_FlexIII  | 99.0 TVVTYHIPONSSLENVDNR                 | Label: 13C(6)15N(4)(R) @ 19                                                                                                    |                                 | 0.00463522  | 2168.07837 | 723.7001 | 2168.07373 | 723.698547 | 3 | 8  | 24.6195 | 29.99 |
| 6   | 55.92 | 58    | 59.7 MAPK10_FlexIII  | 98.9 ILDFGLAR                            | Label: 13C(6)15N(4)(R) @ 8                                                                                                     |                                 | -0.00400051 | 913.525696 | 457.7701 | 913.526062 | 457.770325 | 2 | 9  | 15.9713 | 7.35  |
| 6   | 55.92 | 58    | 59.7 MAPK10_FlexIII  | 98.9 ILDFGLAR                            | Label: 13C(6)15N(4)(R) @ 8                                                                                                     |                                 | -0.00101086 | 913.525085 | 457.7698 | 913.526062 | 457.770325 | 2 | 9  | 17.8297 | 7.35  |
| 6   | 55.92 | 58    | 59.7 MAPK10_FlexIII  | 98.9 MLVIDPAKR                           | Label: 13C(6)15N(2)(K) @ 8; Label: 13C(6)15N(4)(R) @ 9                                                                         | missed K-R @ 8                  | 0.00141317  | 1059.62439 | 354.2154 | 1059.62293 | 354.214935 | 3 | 9  | 13.8857 | 7.35  |
| 1   | 72.6  | 72.6  | 57.2 ZAP70_FlexIII   | 98.9 WYAPECINFRK                         | Propionamide(C) @ 6; Label: 13C(6)15N(4)(R) @ 10; Label: 13C(6)15N(2)(K) @ 11                                                  | missed R-K @ 10                 | 0.00069191  | 1514.74658 | 505.9228 | 1514.74597 | 505.922577 | 3 | 10 | 16.2654 | 34.38 |
| 17  | 34.24 | 36.26 | 47.8 SFRP4_FlexIII   | 98.9 NYSYVIHAK                           |                                                                                                                                |                                 | 0.00026937  | 1093.55591 | 547.7852 | 1093.55566 | 547.785095 | 2 | 11 | 12.6456 | 3.71  |
| 16  | 34.39 | 36.39 | 70.4 HAVCR2_FlexIII  | 98.9 DFTAAPFR                            | Label: 13C(6)15N(4)(R) @ 8                                                                                                     |                                 | -0.00059247 | 933.457886 | 467.7362 | 933.458374 | 467.736481 | 2 | 8  | 15.2997 | 14.84 |
| 24  | 27.17 | 29.2  |                      |                                          |                                                                                                                                |                                 |             |            |          |            |            |   |    |         |       |

|    |       |       |                      |                                      |                                                                                                                 |                     |             |            |          |            |            |   |    |         |       |
|----|-------|-------|----------------------|--------------------------------------|-----------------------------------------------------------------------------------------------------------------|---------------------|-------------|------------|----------|------------|------------|---|----|---------|-------|
| 10 | 48.28 | 50.28 | 79.7 YWHAQ_FlexIII   | 98.8 DNLTLWTSDSAGEECDAAEGAENYPTFLYK  | Deamidated(N) @2; Propionamide(C) @15; Label:13C(6)15N(2)(K) @30                                                |                     | 0.0303103   | 3389.49512 | 1130.839 | 3389.46484 | 1130.82886 | 3 | 7  | 19.1747 | 54.97 |
| 3  | 59.71 | 61.81 | 49.8 VANGL1_FlexIII  | 98.8 LVSDEAVTNGLRDGI/VFLK            | Deamidated(N) @9; Label:13C(6)15N(4)(R) @12; Label:13C(6)15N(2)(K) @20                                          | missed R-D @12      | -0.00319653 | 2163.18774 | 722.0698 | 2163.19067 | 722.070801 | 3 | 11 | 16.2898 | 19.55 |
| 17 | 34.24 | 36.26 | 47.8 SFRP4_FlexIII   | 98.8 MYNHSWPESLACDELPLYDOR           | Deamidated(N) @3; Propionamide(C) @12                                                                           |                     | -0.00602272 | 2496.06665 | 833.0295 | 2496.07251 | 833.031494 | 3 | 12 | 17.7293 | 3.71  |
| 7  | 55.61 | 59.66 | 62.8 HCFC1_FlexIII   | 98.8 NGPPPCPR                        | Deamidated(N) @1; Propionamide(C) @6; Label:13C(6)15N(4)(R) @8                                                  |                     | -0.00107042 | 918.424683 | 460.2196 | 918.42572  | 460.220123 | 2 | 9  | 11.9311 | 10.99 |
| 7  | 55.61 | 59.66 | 62.8 HCFC1_FlexIII   | 98.8 VVGWSGPPVPRPR                   | Label:13C(6)15N(4)(R) @10; Label:13C(6)15N(4)(R) @12                                                            |                     | -0.0102287  | 1325.73694 | 442.9196 | 1325.74707 | 442.922974 | 3 | 9  | 14.1551 | 10.99 |
| 19 | 31.92 | 34.17 | 40.7 IL1RAP_FlexIII  | 98.8 VAFPLEVVQK                      |                                                                                                                 |                     | -0.00168985 | 1128.65271 | 565.3336 | 1128.6543  | 565.334412 | 2 | 11 | 15.5701 | 8.71  |
| 1  | 72.6  | 72.6  | 57.2 ZAP70_FlexIII   | 98.8 GPEVMFIEQGR                     | Label:13C(6)15N(2)(K) @12; Label:13C(6)15N(4)(R) @13                                                            | missed K-R @12      | -0.00123128 | 1478.76575 | 493.9292 | 1478.76709 | 493.929627 | 3 | 10 | 15.0879 | 34.38 |
| 1  | 72.6  | 72.6  | 57.2 ZAP70_FlexIII   | 98.8 ISDFGLSK                        | Label:13C(6)15N(2)(K) @5; Label:13C(6)15N(4)(R) @13                                                             |                     | -0.00177164 | 865.452698 | 433.7336 | 865.454529 | 433.734558 | 2 | 9  | 13.9048 | 34.38 |
| 1  | 72.6  | 72.6  | 57.2 ZAP70_FlexIII   | 98.8 QGTEKADTEEMMR                   | Label:13C(6)15N(4)(R) @8                                                                                        | missed K-A @5       | -0.00764564 | 1542.6698  | 515.2305 | 1542.67737 | 515.233032 | 3 | 10 | 11.0523 | 34.38 |
| 6  | 55.92 | 58    | 59.7 MAPK10_FlexIII  | 98.7 ILDFGLAR                        | Label:13C(6)15N(4)(R) @8                                                                                        |                     | -0.00101086 | 913.525085 | 457.7698 | 913.526062 | 457.770325 | 2 | 7  | 23.6204 | 7.35  |
| 13 | 39.97 | 41.97 | 60.7 TREM1_FlexIII   | 98.7 TVTQAPPK                        | Label:13C(6)15N(2)(K) @8                                                                                        |                     | -0.00039789 | 848.484497 | 425.2495 | 848.484741 | 425.249634 | 2 | 9  | 10.6094 | 38.93 |
| 15 | 38    | 42.06 | 61.3 CCDC132_FlexIII | 98.7 YELEKLPPVLNLQLEAYR              | Label:13C(6)15N(2)(K) @5; Deamidated(N) @11; Label:13C(6)15N(4)(R) @19                                          | missed K-L @5       | -0.0633886  | 2335.17969 | 779.4005 | 2335.24292 | 779.421631 | 3 | 11 | 16.6607 | 8.81  |
| 40 | 20.03 | 22.17 | 74.7 C3ORF10_FlexIII | 98.7 VTKGETLTYPTFLYK                 | Label:13C(6)15N(2)(K) @3; Label:13C(6)15N(2)(K) @15                                                             | missed K-G @3       | 0.0125332   | 1775.98059 | 593.0008 | 1775.96802 | 592.996643 | 3 | 9  | 18.82   | 28.59 |
| 1  | 72.6  | 72.6  | 57.2 ZAP70_FlexIII   | 98.7 GPEVMFIEQGR                     | Label:13C(6)15N(2)(K) @12; Label:13C(6)15N(4)(R) @13                                                            | missed K-R @12      | 0.00352946  | 1478.77051 | 493.9308 | 1478.76709 | 493.929627 | 3 | 10 | 16.3764 | 34.38 |
| 28 | 25.1  | 27.19 | 50.3 CIDEB_FlexIII   | 98.7 LHSYPTFLYK                      | Label:13C(6)15N(2)(K) @11                                                                                       |                     | -0.00055449 | 1438.73706 | 480.5863 | 1438.73767 | 480.586487 | 3 | 10 | 15.2007 | 5.63  |
| 31 | 24.39 | 28.22 | 36.2 ARPC5_FlexIII   | 98.7 ALAAGVGVSIVR                    | Label:13C(6)15N(4)(R) @12                                                                                       |                     | -0.00679108 | 1079.62585 | 540.8202 | 1079.63269 | 540.823608 | 2 | 7  | 21.8566 | 36.87 |
| 6  | 55.92 | 58    | 59.7 MAPK10_FlexIII  | 98.6 EHTIEEWK                        | Label:13C(6)15N(2)(K) @8                                                                                        |                     | 0.00095083  | 1078.51843 | 540.2665 | 1078.51746 | 540.265991 | 2 | 10 | 12.6176 | 7.35  |
| 17 | 34.24 | 36.26 | 47.8 SFRP4_FlexIII   | 98.6 ARDDCEPLMK                      | Label:13C(6)15N(4)(R) @2; Propionamide(C) @5; Label:13C(6)15N(2)(K) @10                                         | missed R-D @2       | 0.00186269  | 1265.58814 | 422.87   | 1265.5863  | 422.869385 | 3 | 10 | 12.3341 | 3.71  |
| 16 | 34.39 | 36.39 | 70.4 HAVCR2_FlexIII  | 98.6 QQPSOPLGCR                      | Propionamide(C) @9; Label:13C(6)15N(4)(R) @10                                                                   |                     | -0.00018442 | 1193.58484 | 597.7997 | 1193.58508 | 597.799805 | 2 | 9  | 12.8816 | 14.84 |
| 27 | 25.18 | 29.37 | 75.4 RBP5_FlexIII    | 98.6 CQITVITVEEHLVCVQKGEVPNR         | Propionamide(C) @1; Deamidated(Q) @2; Propionamide(C) @14; Label:13C(6)15N(2)(K) @17; Label:13C(6)15N(4)(R) @23 | missed K-G @17      | 0.0228462   | 2857.40845 | 715.3594 | 2857.38574 | 715.353699 | 4 | 11 | 15.9764 | 22.16 |
| 6  | 55.92 | 58    | 59.7 MAPK10_FlexIII  | 98.6 ILDFGLAR                        | Label:13C(6)15N(4)(R) @8                                                                                        |                     | -0.00101086 | 913.525085 | 457.7698 | 913.526062 | 457.770325 | 2 | 7  | 23.9288 | 7.35  |
| 43 | 19.36 | 21.5  | 48.2 RBM9_FlexIII    | 98.6 RLHVSNIFFR                      | Label:13C(6)15N(2)(K) @1; Label:13C(6)15N(4)(R) @10                                                             | missed R-L @1       | -0.0208654  | 1257.69995 | 420.2406 | 1257.72095 | 420.247589 | 3 | 9  | 18.1819 | 17.19 |
| 1  | 72.6  | 72.6  | 57.2 ZAP70_FlexIII   | 98.6 QIDVAIK                         | Label:13C(6)15N(2)(K) @7                                                                                        |                     | -0.00072951 | 793.478272 | 397.7464 | 793.478882 | 397.746735 | 2 | 8  | 13.2245 | 34.38 |
| 1  | 72.6  | 72.6  | 57.2 ZAP70_FlexIII   | 98.6 VEGPPGSTQK                      | Label:13C(6)15N(2)(K) @10                                                                                       |                     | 0.00897472  | 1006.52649 | 504.2705 | 1006.51746 | 504.266022 | 2 | 9  | 9.1973  | 34.38 |
| 3  | 59.71 | 61.81 | 49.8 VANGL1_FlexIII  | 98.6 FYSLGHLSIOR                     | Label:13C(6)15N(4)(R) @11                                                                                       |                     | 0.00303145  | 1329.70715 | 444.243  | 1329.70691 | 444.24292  | 3 | 10 | 14.4891 | 19.55 |
| 7  | 55.61 | 59.66 | 62.8 HCFC1_FlexIII   | 98.5 SLYPTFLYK                       | Label:13C(6)15N(2)(K) @9                                                                                        |                     | -0.00868153 | 1138.60669 | 570.3106 | 1138.61536 | 570.315002 | 2 | 9  | 15.6813 | 10.99 |
| 31 | 24.39 | 28.22 | 36.2 ARPC5_FlexIII   | 98.5 TVYPTFLYK                       | Label:13C(6)15N(2)(K) @9                                                                                        |                     | -0.00868153 | 1138.60669 | 570.3106 | 1138.61536 | 570.315002 | 2 | 9  | 15.6813 | 36.87 |
| 44 | 18.26 | 22.53 | 46.7 TAX1BP3_FlexIII | 98.5 LSYPTFLYK                       | Label:13C(6)15N(2)(K) @9                                                                                        | cleaved M-L @N-term | -0.00868153 | 1138.60669 | 570.3106 | 1138.61536 | 570.315002 | 2 | 9  | 15.6813 | 19.85 |
| 6  | 55.92 | 58    | 59.7 MAPK10_FlexIII  | 98.5 ILDFGLAR                        | Label:13C(6)15N(4)(R) @8                                                                                        |                     | -0.00101086 | 913.525085 | 457.7698 | 913.526062 | 457.770325 | 2 | 9  | 15.4425 | 7.35  |
| 13 | 39.97 | 41.97 | 60.7 TREM1_FlexIII   | 98.5 ALCPLYTSR                       | Propionamide(C) @3; Label:13C(6)15N(4)(R) @10                                                                   |                     | -0.00068184 | 1200.61951 | 601.317  | 1200.62    | 601.317322 | 2 | 9  | 19.0802 | 38.93 |
| 13 | 39.97 | 41.97 | 60.7 TREM1_FlexIII   | 98.5 ALCPLYTSR                       | Propionamide(C) @3; Label:13C(6)15N(4)(R) @10                                                                   |                     | 0.00468925  | 1200.62463 | 601.3196 | 1200.62    | 601.317322 | 2 | 8  | 20.8508 | 38.93 |
| 13 | 39.97 | 41.97 | 60.7 TREM1_FlexIII   | 98.5 MVNLQVEDSGLYQCIVYQPPKHEMLFDR    | Deamidated(Q) @13; Propionamide(C) @14; Label:13C(6)15N(2)(K) @21; Label:13C(6)15N(4)(R) @29                    | missed K-E @21      | 0.0222179   | 3538.7273  | 885.6891 | 3538.70532 | 885.683594 | 4 | 11 | 18.3666 | 38.93 |
| 15 | 38    | 42.06 | 61.3 CCDC132_FlexIII | 98.5 HLNIK                           | Label:13C(6)15N(2)(K) @6                                                                                        |                     | -8.80E-06   | 702.42688  | 352.2207 | 702.426819 | 352.220673 | 2 | 8  | 10.6293 | 8.81  |
| 3  | 59.71 | 61.81 | 49.8 VANGL1_FlexIII  | 98.5 DMNADSVGLDCKR                   | Propionamide(C) @10; Label:13C(6)15N(2)(K) @11; Label:13C(6)15N(4)(R) @12                                       | missed K-R @11      | -0.00793821 | 1455.63721 | 486.2197 | 1455.64526 | 486.222382 | 3 | 10 | 12.85   | 19.55 |
| 10 | 48.28 | 50.28 | 79.7 YWHAQ_FlexIII   | 98.5 NVVGGR                          | Label:13C(6)15N(4)(R) @6                                                                                        |                     | 0.00528814  | 610.3479   | 306.1812 | 610.342651 | 306.178589 | 2 | 6  | 8.1172  | 54.97 |
| 28 | 25.1  | 27.19 | 50.3 CIDEB_FlexIII   | 98.5 SGVLSYGLGR                      | Label:13C(6)15N(4)(R) @10                                                                                       |                     | -0.00160526 | 1017.54669 | 509.7806 | 1017.54828 | 509.781403 | 2 | 10 | 15.2873 | 5.63  |
| 15 | 38    | 42.06 | 61.3 CCDC132_FlexIII | 98.4 KVADILEK                        | Label:13C(6)15N(2)(K) @1; Label:13C(6)15N(2)(K) @9                                                              | missed K-V @1       | -0.00115652 | 1043.65503 | 348.8923 | 1043.65613 | 348.89267  | 3 | 8  | 13.7451 | 8.81  |
| 17 | 34.24 | 36.26 | 47.8 SFRP4_FlexIII   | 98.4 MMLLENCLVEK                     | Propionamide(C) @7; Label:13C(6)15N(2)(K) @11                                                                   |                     | 0.00894491  | 1400.70471 | 701.3596 | 1400.69568 | 701.355164 | 2 | 11 | 16.0865 | 3.71  |
| 19 | 31.92 | 34.17 | 40.7 IL1RAP_FlexIII  | 98.4 QIQVFEDEPAR                     | Label:13C(6)15N(4)(R) @11                                                                                       |                     | 0.00611395  | 1340.66602 | 671.3403 | 1340.66003 | 671.33728  | 2 | 11 | 14.5692 | 8.71  |
| 3  | 59.71 | 61.81 | 49.8 VANGL1_FlexIII  | 98.4 AALVLENYKYDFTIYNPNLLTASK        | Label:13C(6)15N(2)(K) @11; Deamidated(N) @17; Label:13C(6)15N(2)(K) @25                                         | missed K-D @11      | 0.0116428   | 2876.53003 | 720.1398 | 2876.51831 | 720.136841 | 4 | 11 | 17.2524 | 19.55 |
| 7  | 55.61 | 59.66 | 62.8 HCFC1_FlexIII   | 98.4 LYWISGR                         | Label:13C(6)15N(4)(R) @7                                                                                        |                     | -0.00082079 | 903.48346  | 452.749  | 903.484192 | 452.74939  | 2 | 7  | 15.2982 | 10.99 |
| 1  | 72.6  | 72.6  | 57.2 ZAP70_FlexIII   | 98.4 ISDFGLSK                        | Label:13C(6)15N(2)(K) @8                                                                                        |                     | -0.00235533 | 873.466492 | 437.7405 | 873.46875  | 437.741638 | 2 | 9  | 14.4634 | 34.38 |
| 1  | 72.6  | 72.6  | 57.2 ZAP70_FlexIII   | 98.4 NVLLVNR                         | Label:13C(6)15N(4)(R) @7                                                                                        |                     | -0.00075882 | 836.510071 | 419.2623 | 836.510742 | 419.262665 | 2 | 8  | 13.9241 | 34.38 |
| 1  | 72.6  | 72.6  | 57.2 ZAP70_FlexIII   | 98.4 REEIPVSNVALLHQVSMGMK            | Label:13C(6)15N(4)(R) @1; Label:13C(6)15N(2)(K) @21                                                             | missed R-E @1       | -0.0309446  | 2384.20044 | 795.7407 | 2384.2312  | 795.750977 | 3 | 10 | 18.3142 | 34.38 |
| 28 | 25.1  | 27.19 | 50.3 CIDEB_FlexIII   | 98.4 LHSYPTFLYK                      | Label:13C(6)15N(2)(K) @11                                                                                       |                     | 0.0123544   | 1438.75    | 480.5906 | 1438.73767 | 480.586487 | 3 | 9  | 17.1316 | 5.63  |
| 43 | 19.36 | 21.5  | 48.2 RBM9_FlexIII    | 98.3 KIEVNNTAR                       | Label:13C(6)15N(2)(K) @1; Label:13C(6)15N(4)(R) @10                                                             | missed K-I @1       | -0.00149556 | 1132.63062 | 378.5508 | 1132.63196 | 378.55127  | 3 | 10 | 11.3252 | 17.19 |
| 13 | 39.97 | 41.97 | 60.7 TREM1_FlexIII   | 98.3 ALCPLYTSR                       | Propionamide(C) @3; Label:13C(6)15N(4)(R) @10                                                                   |                     | 0.00346855  | 1200.62341 | 601.319  | 1200.62    | 601.317322 | 2 | 9  | 18.8264 | 38.93 |
| 13 | 39.97 | 41.97 | 60.7 TREM1_FlexIII   | 98.3 ILEDYHDHGLLR                    | Label:13C(6)15N(2)(K) @11                                                                                       |                     | -0.00161792 | 1592.82935 | 531.9504 | 1592.83106 | 531.950989 | 3 | 10 | 14.1605 | 38.93 |
| 13 | 39.97 | 41.97 | 60.7 TREM1_FlexIII   | 98.3 ILEDYHDHGLLR                    | Label:13C(6)15N(4)(R) @13                                                                                       |                     | 0.00052452  | 1602.84009 | 401.7173 | 1602.83936 | 401.717102 | 4 | 10 | 14.3054 | 38.93 |
| 3  | 59.71 | 61.81 | 49.8 VANGL1_FlexIII  | 98.3 TSVYPTFLYK                      | Label:13C(6)15N(2)(K) @10                                                                                       | cleaved E-T @N-term | -0.00132733 | 1225.64612 | 613.8303 | 1225.64746 | 613.830994 | 2 | 9  | 17.5655 | 19.55 |
| 39 | 20.26 | 24.3  | 50.4 MUC15_FlexIII   | 98.3 TSVYPTFLYK                      | Label:13C(6)15N(2)(K) @10                                                                                       |                     | -0.00132733 | 1225.64612 | 613.8303 | 1225.64746 | 613.830994 | 2 | 9  | 17.5655 | 14.27 |
| 6  | 55.92 | 58    | 59.7 MAPK10_FlexIII  | 98.1 ILDFGLAR                        | Label:13C(6)15N(4)(R) @8                                                                                        |                     | -0.00101086 | 913.525085 | 457.7698 | 913.526062 | 457.770325 | 2 | 7  | 23.1092 | 7.35  |
| 6  | 55.92 | 58    | 59.7 MAPK10_FlexIII  | 98.3 ISVDDALQHPYINVVYDPAEVEAPPPQIYDK | Label:13C(6)15N(2)(K) @31                                                                                       |                     | -0.00356085 | 3589.74512 | 1197.589 | 3589.74976 | 1197.59045 | 3 | 7  | 18.9347 | 7.35  |
| 43 | 19.36 | 21.5  | 48.2 RBM9_FlexIII    | 98.3 EKLHGTVVEGR                     | Glu->pyro-Glu @N-term; Label:13C(6)15N(2)(K) @2; Label:13C(6)15N(4)(R) @11                                      | missed K-L @2       | 0.00602962  | 1223.68051 | 408.9007 | 1223.67419 | 408.898651 | 3 | 11 | 11.9485 | 17.19 |
| 43 | 19.36 | 21.5  | 48.2 RBM9_FlexIII    | 98.3 FRDPDLR                         | Label:13C(6)15N(4)(R) @2; Label:13C(6)15N(4)(R) @7                                                              | missed R-D @2       | -0.00734269 | 937.481201 | 313.501  | 937.488464 | 313.503418 | 3 | 9  | 12.8015 | 17.19 |
| 43 | 19.36 | 21.5  | 48.2 RBM9_FlexIII    | 98.3 LHGTVEVGR                       | Label:13C(6)15N(4)(R) @9                                                                                        |                     | 0.00443273  | 976.537293 | 326.5197 | 976.532959 | 326.51825  | 3 | 9  | 11.3018 | 17.19 |
| 22 | 28.89 | 30.92 | 54.1 LYVE1_FlexIII   | 98.2 CGKNGVGVLIR                     | Propionamide(C) @1; Label:13C(6)15N(2)(K) @3; Label:13C(6)15N(4)(R) @11                                         | missed K-N @3       | 0.0100963   | 1203.69788 | 402.2399 | 1203.68762 | 402.236511 | 3 | 9  | 13.1747 | 16.47 |
| 6  | 55.92 | 58    | 59.7 MAPK10_FlexIII  | 98.2 ILDFGLAR                        | Label:13C(6)15N(4)(R) @8                                                                                        |                     | -0.00040051 | 913.525696 | 457.7701 | 913.526062 | 457.770325 | 2 | 9  | 16.9871 | 7.35  |
| 1  | 72.6  | 72.6  | 57.2 ZAP70_FlexIII   | 98.2 ADTEEMMR                        | Label:13C(6)15N(4)(R) @8                                                                                        |                     | 0.00860915  | 991.406494 | 496.7105 | 991.397827 | 496.706207 | 2 | 9  | 12.0407 | 34.38 |
| 40 | 20.03 | 22.17 | 74.7 C3ORF10_FlexIII | 98.2 GETLTYPTFLYK                    | Label:13C(6)15N(2)(K) @12                                                                                       |                     | 0.00394201  | 1439.7467  | 720.8806 | 1439.74428 | 720.878662 | 2 | 8  | 19.0351 |       |

|     |       |       |                     |                                       |                                                                                                           |               |            |            |            |            |            |   |    |         |       |
|-----|-------|-------|---------------------|---------------------------------------|-----------------------------------------------------------------------------------------------------------|---------------|------------|------------|------------|------------|------------|---|----|---------|-------|
| 27  | 25.18 | 29.37 | 75.4 RBP5_FlexII    | 98.1 IALLKPKDKEIEHOGNHMTVR            | Label:13C(6)15N(2)(K)@6; Label:13C(6)15N(2)(K)@9; Label:13C(6)15N(4)(R)@21                                | missed K-E@9  | 0.0117899  | 2467.36963 | 617.8497   | 2467.35791 | 617.846741 | 4 | 10 | 16.4284 | 22.16 |
| 27  | 25.18 | 29.37 | 75.4 RBP5_FlexII    | 98.1 KCQTIVTWEEHLVVCVQK               | Label:13C(6)15N(2)(K)@1; Propionamide(C)@2; Deamidated(Q)@3; Propionamide(C)@15; Label:13C(6)15N(2)(K)@18 | missed K-C@1  | 0.0128293  | 2331.17017 | 583.7998   | 2331.15747 | 583.796631 | 4 | 10 | 24.6421 | 22.16 |
| 6   | 55.92 | 58    | 59.7 MAPK10_FlexII  | 98.1 ILDFGLAR                         | Label:13C(6)15N(4)(R)@8                                                                                   | 2.67E-05      | 913.526062 | 457.7703   | 913.526062 | 457.770325 |            | 2 | 9  | 16.2495 | 7.35  |
| 19  | 31.92 | 34.17 | 40.7 IL1RAP_FlexII  | 98.0 DSCFNSPMKLVPVK                   | Propionamide(C)@3; Label:13C(6)15N(2)(K)@9; Label:13C(6)15N(2)(K)@14                                      | missed K-L@9  | 0.0151087  | 1688.8501  | 423.2198   | 1688.83496 | 423.216003 | 4 | 11 | 15.448  | 8.71  |
| 13  | 39.97 | 41.97 | 60.7 TREM1_FlexII   | 98.0 ALCPLYTSPPR                      | Propionamide(C)@3; Label:13C(6)15N(4)(R)@10                                                               | -0.00153633   | 1200.61853 | 601.3165   | 1200.62    | 601.317322 |            | 2 | 8  | 20.5799 | 38.93 |
| 13  | 39.97 | 41.97 | 60.7 TREM1_FlexII   | 98.0 ALCPLYTSPPR                      | Propionamide(C)@3; Label:13C(6)15N(4)(R)@10                                                               | -0.00468925   | 1200.62463 | 601.3196   | 1200.62    | 601.317322 |            | 2 | 8  | 24.7777 | 38.93 |
| 13  | 39.97 | 41.97 | 60.7 TREM1_FlexII   | 98.0 MVNLQVEDSGLYQCVIYQPPKEPHMLFDR    | Deamidated(Q)@13; Propionamide(C)@14; Label:13C(6)15N(2)(K)@21; Label:13C(6)15N(4)(R)@29                  | missed K-E@21 | 0.0387678  | 3538.74512 | 1180.589   | 3538.70532 | 1180.57568 | 3 | 11 | 17.0743 | 38.93 |
| 13  | 39.97 | 41.97 | 60.7 TREM1_FlexII   | 98.0 MVNLQVEDSGLYQCVIYQPPKEPHMLFDR    | Deamidated(Q)@13; Propionamide(C)@14; Label:13C(6)15N(2)(K)@21; Label:13C(6)15N(4)(R)@29                  | missed K-E@21 | 0.0222179  | 3538.7273  | 885.6891   | 3538.70532 | 885.683594 | 4 | 11 | 18.1116 | 38.93 |
| 13  | 39.97 | 41.97 | 60.7 TREM1_FlexII   | 98.0 NSHPVOVGR                        | Label:13C(6)15N(4)(R)@9                                                                                   | -0.00033754   | 1002.52307 | 502.2688   | 1002.52344 | 502.269013 |            | 2 | 8  | 9.7901  | 38.93 |
| 1   | 72.6  | 72.6  | 57.2 ZAP70_FlexII   | 98.0 YPTFLYK                          |                                                                                                           | -0.00103082   | 930.48407  | 466.2493   | 930.485107 | 466.249817 |            | 2 | 9  | 14.9156 | 34.38 |
| 3   | 59.71 | 61.81 | 49.8 VANGL1_FlexII  | 98.0 YPTFLYK                          |                                                                                                           | -0.00103082   | 930.48407  | 466.2493   | 930.485107 | 466.249817 |            | 2 | 9  | 14.9156 | 19.55 |
| 4   | 58.79 | 60.84 | 74.2 TCP10_FlexII   | 98.0 YPTFLYK                          |                                                                                                           | -0.00103082   | 930.48407  | 466.2493   | 930.485107 | 466.249817 |            | 2 | 9  | 14.9156 | 15.28 |
| 5   | 57.74 | 59.78 | 79.0 CCND1_FlexII   | 98.0 YPTFLYK                          |                                                                                                           | -0.00103082   | 930.48407  | 466.2493   | 930.485107 | 466.249817 |            | 2 | 9  | 14.9156 | 30.90 |
| 6   | 55.92 | 58    | 59.7 MAPK10_FlexII  | 98.0 YPTFLYK                          |                                                                                                           | -0.00103082   | 930.48407  | 466.2493   | 930.485107 | 466.249817 |            | 2 | 9  | 14.9156 | 7.35  |
| 7   | 55.61 | 59.66 | 62.8 HCFC1_FlexII   | 98.0 YPTFLYK                          |                                                                                                           | -0.00103082   | 930.48407  | 466.2493   | 930.485107 | 466.249817 |            | 2 | 9  | 14.9156 | 10.99 |
| 8   | 55.19 | 57.25 | 70.0 NET1_FlexII    | 98.0 YPTFLYK                          |                                                                                                           | -0.00103082   | 930.48407  | 466.2493   | 930.485107 | 466.249817 |            | 2 | 9  | 14.9156 | 4.38  |
| 9   | 52.97 | 54.97 | 76.9 CLIC2_FlexII   | 98.0 YPTFLYK                          |                                                                                                           | -0.00103082   | 930.48407  | 466.2493   | 930.485107 | 466.249817 |            | 2 | 9  | 14.9156 | 20.05 |
| 10  | 48.28 | 50.28 | 79.7 YWHAQ_FlexII   | 98.0 YPTFLYK                          |                                                                                                           | -0.00103082   | 930.48407  | 466.2493   | 930.485107 | 466.249817 |            | 2 | 9  | 14.9156 | 54.97 |
| 13  | 39.97 | 41.97 | 60.7 TREM1_FlexII   | 98.0 YPTFLYK                          |                                                                                                           | -0.00103082   | 930.48407  | 466.2493   | 930.485107 | 466.249817 |            | 2 | 9  | 14.9156 | 38.93 |
| 14  | 38.47 | 42.47 | 48.1 CCNE1_FlexII   | 98.0 YPTFLYK                          |                                                                                                           | -0.00103082   | 930.48407  | 466.2493   | 930.485107 | 466.249817 |            | 2 | 9  | 14.9156 | 11.02 |
| 15  | 38    | 42.06 | 61.3 CCDC132_FlexII | 98.0 YPTFLYK                          |                                                                                                           | -0.00103082   | 930.48407  | 466.2493   | 930.485107 | 466.249817 |            | 2 | 9  | 14.9156 | 8.81  |
| 16  | 34.39 | 36.39 | 70.4 HAVCR2_FlexII  | 98.0 YPTFLYK                          |                                                                                                           | -0.00103082   | 930.48407  | 466.2493   | 930.485107 | 466.249817 |            | 2 | 9  | 14.9156 | 14.84 |
| 17  | 34.24 | 36.26 | 47.8 SFRP4_FlexII   | 98.0 YPTFLYK                          |                                                                                                           | -0.00103082   | 930.48407  | 466.2493   | 930.485107 | 466.249817 |            | 2 | 9  | 14.9156 | 3.71  |
| 19  | 31.92 | 34.17 | 40.7 IL1RAP_FlexII  | 98.0 YPTFLYK                          |                                                                                                           | -0.00103082   | 930.48407  | 466.2493   | 930.485107 | 466.249817 |            | 2 | 9  | 14.9156 | 8.71  |
| 22  | 28.89 | 30.92 | 54.1 LVYE1_FlexII   | 98.0 YPTFLYK                          |                                                                                                           | -0.00103082   | 930.48407  | 466.2493   | 930.485107 | 466.249817 |            | 2 | 9  | 14.9156 | 16.47 |
| 24  | 27.17 | 29.2  | 66.8 ICOSLG_FlexII  | 98.0 YPTFLYK                          |                                                                                                           | -0.00103082   | 930.48407  | 466.2493   | 930.485107 | 466.249817 |            | 2 | 9  | 14.9156 | 29.99 |
| 26  | 25.25 | 27.61 | 59.3 HOXC9_FlexII   | 98.0 YPTFLYK                          |                                                                                                           | -0.00103082   | 930.48407  | 466.2493   | 930.485107 | 466.249817 |            | 2 | 9  | 14.9156 | 9.65  |
| 27  | 25.18 | 29.37 | 75.4 RBP5_FlexII    | 98.0 YPTFLYK                          |                                                                                                           | -0.00103082   | 930.48407  | 466.2493   | 930.485107 | 466.249817 |            | 2 | 9  | 14.9156 | 22.16 |
| 28  | 25.1  | 27.19 | 50.3 CIDEB_FlexII   | 98.0 YPTFLYK                          |                                                                                                           | -0.00103082   | 930.48407  | 466.2493   | 930.485107 | 466.249817 |            | 2 | 9  | 14.9156 | 5.63  |
| 31  | 24.39 | 28.22 | 36.2 ARPC5_FlexII   | 98.0 YPTFLYK                          |                                                                                                           | -0.00103082   | 930.48407  | 466.2493   | 930.485107 | 466.249817 |            | 2 | 9  | 14.9156 | 36.87 |
| 35  | 23.16 | 27.25 | 38.4 CASC4_FlexII   | 98.0 YPTFLYK                          |                                                                                                           | -0.00103082   | 930.48407  | 466.2493   | 930.485107 | 466.249817 |            | 2 | 9  | 14.9156 | 12.19 |
| 39  | 20.26 | 24.3  | 50.4 MUC15_FlexII   | 98.0 YPTFLYK                          |                                                                                                           | -0.00103082   | 930.48407  | 466.2493   | 930.485107 | 466.249817 |            | 2 | 9  | 14.9156 | 14.27 |
| 40  | 20.03 | 22.17 | 74.7 C3ORF10_FlexII | 98.0 YPTFLYK                          |                                                                                                           | -0.00103082   | 930.48407  | 466.2493   | 930.485107 | 466.249817 |            | 2 | 9  | 14.9156 | 28.59 |
| 43  | 19.36 | 21.5  | 48.2 RBM9_FlexII    | 98.0 YPTFLYK                          |                                                                                                           | -0.00103082   | 930.48407  | 466.2493   | 930.485107 | 466.249817 |            | 2 | 9  | 14.9156 | 17.19 |
| 44  | 18.26 | 22.53 | 46.7 TAX1BP3_FlexII | 98.0 YPTFLYK                          |                                                                                                           | -0.00103082   | 930.48407  | 466.2493   | 930.485107 | 466.249817 |            | 2 | 9  | 14.9156 | 19.85 |
| 47  | 17.57 | 21.46 | 54.3 KLRCA_FlexII   | 98.0 YPTFLYK                          |                                                                                                           | -0.00103082   | 930.48407  | 466.2493   | 930.485107 | 466.249817 |            | 2 | 9  | 14.9156 | 15.01 |
| 171 | 0.42  | 2.52  | 65.0 HIF1AN_FlexII  | 98.0 YPTFLYK                          |                                                                                                           | -0.00103082   | 930.48407  | 466.2493   | 930.485107 | 466.249817 |            | 2 | 9  | 14.9156 | 25.53 |
| 231 | 0.05  | 2.09  | 56.1 CDC25C_FlexII  | 98.0 YPTFLYK                          |                                                                                                           | -0.00103082   | 930.48407  | 466.2493   | 930.485107 | 466.249817 |            | 2 | 9  | 14.9156 | 33.74 |
| 19  | 31.92 | 34.17 | 40.7 IL1RAP_FlexII  | 98.0 DSCFNSPMKLVPVK                   | Propionamide(C)@3; Label:13C(6)15N(2)(K)@9; Label:13C(6)15N(2)(K)@14                                      | missed K-L@9  | 0.0151087  | 1688.8501  | 423.2198   | 1688.83496 | 423.216003 | 4 | 11 | 15.726  | 8.71  |
| 13  | 39.97 | 41.97 | 60.7 TREM1_FlexII   | 97.9 NSHPVOVGR                        | Label:13C(6)15N(4)(R)@9                                                                                   | -0.00059877   | 1002.52264 | 335.1815   | 1002.52344 | 335.181763 |            | 3 | 8  | 9.1035  | 38.93 |
| 28  | 25.1  | 27.19 | 50.3 CIDEB_FlexII   | 97.9 FTFDPVYQKNPR                     | Label:13C(6)15N(2)(K)@7; Label:13C(6)15N(4)(R)@11                                                         | missed K-Q@7  | 0.0016049  | 1431.72815 | 478.25     | 1431.72856 | 478.249451 | 3 | 10 | 14.1488 | 5.63  |
| 28  | 25.1  | 27.19 | 50.3 CIDEB_FlexII   | 97.9 LHSYYPFTFLYK                     | Label:13C(6)15N(2)(K)@11                                                                                  | 0.0123544     | 1438.75    | 480.5906   | 1438.73767 | 480.586487 |            | 3 | 9  | 17.3976 | 5.63  |
| 15  | 38    | 42.06 | 61.3 CCDC132_FlexII | 97.9 VADLILEK                         | Label:13C(6)15N(2)(K)@8                                                                                   | -0.00135514   | 907.545654 | 454.7801   | 907.546997 | 454.780762 |            | 2 | 9  | 14.2205 | 8.81  |
| 43  | 19.36 | 21.5  | 48.2 RBM9_FlexII    | 97.9 FRDPDLR                          | Label:13C(6)15N(4)(R)@2; Label:13C(6)15N(4)(R)@7                                                          | -0.00734269   | 937.481201 | 313.501    | 937.488464 | 313.503418 |            | 3 | 9  | 12.267  | 17.19 |
| 43  | 19.36 | 21.5  | 48.2 RBM9_FlexII    | 97.9 KIEVNNATAR                       | Label:13C(6)15N(2)(K)@1; Label:13C(6)15N(4)(R)@10                                                         | -0.00148556   | 1132.63062 | 378.5508   | 1132.63196 | 378.55127  |            | 3 | 10 | 11.067  | 17.19 |
| 43  | 19.36 | 21.5  | 48.2 RBM9_FlexII    | 97.9 LHGTVVVEGR                       | Label:13C(6)15N(4)(R)@9                                                                                   | -0.00669782   | 976.526245 | 489.2704   | 976.532959 | 489.273743 |            | 2 | 10 | 11.0557 | 17.19 |
| 9   | 52.97 | 54.97 | 76.9 CLIC2_FlexII   | 97.8 EEFTHTCPEDKEIENTYANVAK           | Propionamide(C)@7; Label:13C(6)15N(2)(K)@11; Deamidated(N)@15; Label:13C(6)15N(2)(K)@22                   | missed K-E@11 | 0.0131122  | 2655.21143 | 664.8101   | 2655.19824 | 664.806824 | 4 | 10 | 13.8429 | 20.05 |
| 17  | 34.24 | 36.26 | 47.8 SFRP4_FlexII   | 97.8 RVYPFTFLYK                       | Label:13C(6)15N(4)(R)@1; Label:13C(6)15N(2)(K)@9                                                          | missed R-V@1  | 0.00125512 | 1203.67835 | 402.2334   | 1203.67712 | 402.232971 | 3 | 9  | 14.7332 | 3.71  |
| 27  | 25.18 | 29.37 | 75.4 RBP5_FlexII    | 97.8 VRYPTFLYK                        | Label:13C(6)15N(4)(R)@2; Label:13C(6)15N(2)(K)@9                                                          | missed R-Y@2  | 0.00125512 | 1203.67835 | 402.2334   | 1203.67712 | 402.232971 | 3 | 9  | 14.7332 | 22.16 |
| 19  | 31.92 | 34.17 | 40.7 IL1RAP_FlexII  | 97.8 QIQVEFEDEPAR                     | Gln->pyro-Glu@N-term; Label:13C(6)15N(4)(R)@11                                                            | -0.00741177   | 1323.6261  | 662.8203   | 1323.63342 | 662.823975 |            | 2 | 11 | 15.7043 | 8.71  |
| 6   | 55.92 | 58    | 59.7 MAPK10_FlexII  | 97.8 ILDFGLAR                         | Label:13C(6)15N(4)(R)@8                                                                                   | -0.00101086   | 913.525085 | 457.7698   | 913.526062 | 457.770325 |            | 2 | 7  | 20.9712 | 7.35  |
| 13  | 39.97 | 41.97 | 60.7 TREM1_FlexII   | 97.8 ALCPLYTSPPR                      | Propionamide(C)@3; Label:13C(6)15N(4)(R)@10                                                               | 0.00066094    | 1200.62073 | 601.3176   | 1200.62    | 601.317322 |            | 2 | 9  | 18.5737 | 38.93 |
| 13  | 39.97 | 41.97 | 60.7 TREM1_FlexII   | 97.8 ALCPLYTSPPR                      | Propionamide(C)@3; Label:13C(6)15N(4)(R)@10                                                               | -0.00468925   | 1200.62463 | 601.3196   | 1200.62    | 601.317322 |            | 2 | 6  | 26.114  | 38.93 |
| 28  | 25.1  | 27.19 | 50.3 CIDEB_FlexII   | 97.8 LHSYYPFTFLYK                     | Label:13C(6)15N(2)(K)@11                                                                                  | 8.64E-05      | 1438.73767 | 480.5865   | 1438.73767 | 480.586487 |            | 3 | 10 | 14.9274 | 5.63  |
| 28  | 25.1  | 27.19 | 50.3 CIDEB_FlexII   | 97.8 LHSYYPFTFLYK                     | Label:13C(6)15N(2)(K)@11                                                                                  | 0.0123544     | 1438.75    | 480.5906   | 1438.73767 | 480.586487 |            | 3 | 10 | 15.4677 | 5.63  |
| 43  | 19.36 | 21.5  | 48.2 RBM9_FlexII    | 97.8 EKLHGTVVVEGR                     | Label:13C(6)15N(2)(K)@2; Label:13C(6)15N(4)(R)@11                                                         | -0.00459317   | 1241.67993 | 414.9006   | 1241.68469 | 414.902191 |            | 3 | 10 | 11.1666 | 17.19 |
| 17  | 34.24 | 36.26 | 47.8 SFRP4_FlexII   | 97.8 DDCEPLMK                         | Propionamide(C)@3; Label:13C(6)15N(2)(K)@8                                                                | 0.00534725    | 1028.44531 | 515.2299   | 1028.43982 | 515.227173 |            | 2 | 10 | 12.8767 | 3.71  |
| 13  | 39.97 | 41.97 | 60.7 TREM1_FlexII   | 97.7 NSHPVOVGR                        | Label:13C(6)15N(4)(R)@9                                                                                   | -0.00023256   | 1002.52325 | 335.1817   | 1002.52344 | 335.181763 |            | 3 | 8  | 8.8206  | 38.93 |
| 6   | 55.92 | 58    | 59.7 MAPK10_FlexII  | 97.6 YAGLTFPK                         | Label:13C(6)15N(2)(K)@8                                                                                   | -0.0002481    | 903.494263 | 452.7544   | 903.494568 | 452.754547 |            | 2 | 9  | 14.5713 | 7.35  |
| 26  | 25.25 | 27.61 | 59.3 HOXC9_FlexII   | 97.6 HYALKPDAPYGRR                    | Label:13C(6)15N(2)(K)@5; Label:13C(6)15N(4)(R)@12; Label:13C(6)15N(4)(R)@13                               | missed R-R@12 | 0.00056288 | 1570.83704 | 524.6196   | 1570.8363  | 524.619385 | 3 | 10 | 11.9752 | 9.65  |
| 26  | 25.25 | 27.61 | 59.3 HOXC9_FlexII   | 97.6 HYALKPDAPYGRR                    | Label:13C(6)15N(2)(K)@5; Label:13C(6)15N(4)(R)@12; Label:13C(6)15N(4)(R)@13                               | 0.0117564     | 1570.84815 | 393.7193   | 1570.8363  | 393.716339 |            | 4 | 10 | 17.9885 | 9.65  |
| 15  | 38    | 42.06 | 61.3 CCDC132_FlexII | 97.6 VADLILEK                         | Label:13C(6)15N(2)(K)@8                                                                                   | -0.00056168   | 907.546448 | 454.7805   | 907.546997 | 454.780762 |            | 2 | 9  | 14.4802 | 8.81  |
| 16  | 34.39 | 36.39 | 70.4 HAVCR2_FlexII  | 97.6 DFTAAPPR                         | Label:13C(6)15N(4)(R)@8                                                                                   | 1.79E-05      | 933.458496 | 467.7365   | 933.458374 | 467.736481 |            | 2 | 8  | 16.3128 | 14.84 |
| 8   | 55.19 | 57.25 | 70.0 NET1_FlexII    | 97.6 AAIAPFQSAGSPPELQGLPELHECEGNHPSAR | Propionamide(C)@25; Label:13C(6)15N(4)(R)@33                                                              | -0.00778579   | 3519.66431 | 704.       |            |            |            |   |    |         |       |

|    |       |       |                      |                                     |                                                                                                                      |             |            |          |            |            |   |    |         |       |
|----|-------|-------|----------------------|-------------------------------------|----------------------------------------------------------------------------------------------------------------------|-------------|------------|----------|------------|------------|---|----|---------|-------|
| 10 | 48.28 | 50.28 | 79.7 YWHAQ_FlexIII   | 97.5 YDDMATCMK                      | Propionamide(C)@7; Label: 13C(6)15N(2)(K)@9                                                                          | -0.00255774 | 1155.44653 | 578.7305 | 1155.44898 | 578.731751 | 2 | 9  | 24.4103 | 54.97 |
| 28 | 25.1  | 27.19 | 50.3 CIDEB_FlexIII   | 97.5 FTFDVKY                        | Label: 13C(6)15N(2)(K)@7                                                                                             | -0.00023227 | 926.462647 | 464.2386 | 926.462891 | 464.238739 | 2 | 8  | 15.2723 | 5.63  |
| 6  | 55.92 | 58    | 59.7 MAPK10_FlexIII  | 97.4 DLKPSNIVVK                     | Label: 13C(6)15N(2)(K)@3; Label: 13C(6)15N(2)(K)@10                                                                  | -0.00361061 | 1127.68481 | 564.8497 | 1127.68848 | 564.851502 | 2 | 9  | 24.5258 | 7.35  |
| 40 | 20.03 | 22.17 | 74.7 C3ORF10_FlexIII | 97.4 EIHODWANREYIEITSSIKK           | Label: 13C(6)15N(4)(R)@9; Label: 13C(6)15N(2)(K)@20; Label: 13C(6)15N(2)(K)@21                                       | 0.00847722  | 2598.37378 | 650.6007 | 2598.36523 | 650.598572 | 4 | 10 | 16.8838 | 28.59 |
| 6  | 55.92 | 58    | 59.7 MAPK10_FlexIII  | 97.4 ILFPGRDYIDQWNKVEIQLGTPCPEFMK   | Label: 13C(6)15N(4)(R)@6; Deamidated(N)@13; Label: 13C(6)15N(2)(K)@14; Propionamide(C)@23; Label: 13C(6)15N(2)(K)@28 | 0.00771457  | 3434.7334  | 859.6906 | 3434.72534 | 859.688599 | 4 | 12 | 17.6056 | 7.35  |
| 6  | 55.92 | 58    | 59.7 MAPK10_FlexIII  | 97.3 ILDFGLAR                       | Label: 13C(6)15N(4)(R)@8                                                                                             | -0.00241466 | 913.523682 | 457.7691 | 913.526062 | 457.770325 | 2 | 6  | 27.0591 | 7.35  |
| 17 | 34.24 | 36.26 | 47.8 SFRP4_FlexIII   | 97.3 WRDQLSKR                       | Label: 13C(6)15N(4)(R)@2; Label: 13C(6)15N(2)(K)@7; Label: 13C(6)15N(4)(R)@8                                         | 0.0056845   | 1115.62512 | 558.8198 | 1115.61939 | 558.816956 | 2 | 10 | 11.2686 | 3.71  |
| 19 | 31.92 | 34.17 | 40.7 IL1RAP_FlexIII  | 97.3 TQILSIKK                       | Label: 13C(6)15N(2)(K)@7; Label: 13C(6)15N(2)(K)@8                                                                   | 0.00587908  | 945.625244 | 473.8199 | 945.619385 | 473.816956 | 2 | 10 | 12.6781 | 8.71  |
| 13 | 39.97 | 41.97 | 60.7 TREM1_FlexIII   | 97.2 ALCLPYTSR                      | Propionamide(C)@3; Label: 13C(6)15N(4)(R)@10                                                                         | 0.00468925  | 1200.62463 | 601.3196 | 1200.62    | 601.317322 | 2 | 8  | 18.3191 | 38.93 |
| 13 | 39.97 | 41.97 | 60.7 TREM1_FlexIII   | 97.2 TLACTERPSK                     | Propionamide(C)@4; Label: 13C(6)15N(4)(R)@7; Label: 13C(6)15N(2)(K)@10                                               | 0.00086694  | 1193.62024 | 398.8807 | 1193.61939 | 398.880371 | 3 | 9  | 10.8632 | 38.93 |
| 22 | 28.89 | 30.92 | 54.1 LYVE1_FlexIII   | 97.2 ISPNPK                         | Label: 13C(6)15N(2)(K)@6                                                                                             | 0.00091587  | 662.385254 | 332.1999 | 662.384277 | 332.199402 | 2 | 6  | 8.1799  | 16.47 |
| 16 | 34.39 | 36.39 | 70.4 HAVCR2_FlexIII  | 97.2 FAMPYPTFLYK                    |                                                                                                                      | 0.00026407  | 1376.68433 | 689.3494 | 1376.68384 | 689.349243 | 2 | 9  | 17.3018 | 14.84 |
| 35 | 23.16 | 27.25 | 38.4 CASC4_FlexIII   | 97.1 LONNISYQMADIHHLKEQLAELR        | Label: 13C(6)15N(2)(K)@16; Label: 13C(6)15N(4)(R)@23                                                                 | 0.0251716   | 2781.46021 | 557.2993 | 2781.43506 | 557.294312 | 5 | 10 | 17.16   | 12.19 |
| 6  | 55.92 | 58    | 59.7 MAPK10_FlexIII  | 97.1 ILDFGLAR                       | Label: 13C(6)15N(4)(R)@8                                                                                             | -0.00101086 | 913.525085 | 457.7698 | 913.526062 | 457.770325 | 2 | 5  | 28.0814 | 7.35  |
| 6  | 55.92 | 58    | 59.7 MAPK10_FlexIII  | 97.1 MLVIDPAKR                      | Oxidation(M)@1; Label: 13C(6)15N(2)(K)@8; Label: 13C(6)15N(4)(R)@9                                                   | 0.0099063   | 1075.62781 | 359.5499 | 1075.61792 | 359.54657  | 3 | 9  | 12.8371 | 7.35  |
| 13 | 39.97 | 41.97 | 60.7 TREM1_FlexIII   | 97.1 ALCLPYTSR                      | Propionamide(C)@3; Label: 13C(6)15N(4)(R)@10                                                                         | -0.00092598 | 1200.61902 | 601.3168 | 1200.62    | 601.317322 | 2 | 9  | 14.209  | 38.93 |
| 6  | 55.92 | 58    | 59.7 MAPK10_FlexIII  | 97.0 ISVDDALQHPYINVVYDAEVEAPPPQIDYK | Deamidated(N)@13; Label: 13C(6)15N(2)(K)@31                                                                          | 0.00265732  | 3590.73511 | 1197.919 | 3590.73364 | 1197.91846 | 3 | 11 | 17.6978 | 7.35  |
| 6  | 55.92 | 58    | 59.7 MAPK10_FlexIII  | 97.0 ILDFGLAR                       | Label: 13C(6)15N(4)(R)@8                                                                                             | -0.00097855 | 913.525085 | 457.7698 | 913.526062 | 457.770325 | 2 | 9  | 15.6284 | 7.35  |
| 13 | 39.97 | 41.97 | 60.7 TREM1_FlexIII   | 97.0 IPPTTTK                        | Label: 13C(6)15N(2)(K)@7                                                                                             | -0.00030809 | 764.452087 | 383.2333 | 764.452332 | 383.23346  | 2 | 7  | 9.9555  | 38.93 |
| 17 | 34.24 | 36.26 | 47.8 SFRP4_FlexIII   | 97.0 NYSYVIHAK                      | Label: 13C(6)15N(2)(K)@9                                                                                             | 0.00241674  | 1101.57227 | 551.7934 | 1101.56982 | 551.792175 | 2 | 10 | 12.988  | 3.71  |
| 26 | 25.25 | 27.61 | 59.3 HOXC9_FlexIII   | 97.0 AKPTOLSPREADALAGSK             | Label: 13C(6)15N(2)(K)@17                                                                                            | -0.00893182 | 1659.84705 | 554.2896 | 1659.85596 | 554.292603 | 3 | 10 | 13.566  | 9.65  |
| 26 | 25.25 | 27.61 | 59.3 HOXC9_FlexIII   | 97.0 EKTDKEQSYPTFLYK                | Label: 13C(6)15N(2)(K)@2; Label: 13C(6)15N(2)(K)@5; Label: 13C(6)15N(2)(K)@15                                        | 0.00227757  | 1899.97009 | 475.9998 | 1899.96802 | 475.999298 | 4 | 10 | 17.7918 | 9.65  |
| 19 | 31.92 | 34.17 | 40.7 IL1RAP_FlexIII  | 96.9 DSCFNSPMK                      | Propionamide(C)@3; Label: 13C(6)15N(2)(K)@9                                                                          | -9.55E-05   | 1106.46143 | 554.238  | 1106.46167 | 554.238098 | 2 | 10 | 12.8998 | 8.71  |
| 6  | 55.92 | 58    | 59.7 MAPK10_FlexIII  | 96.9 LFPDSLFPADSEHNKJK              | Label: 13C(6)15N(2)(K)@15; Label: 13C(6)15N(2)(K)@17                                                                 | 0.00073472  | 1973.0238  | 494.2632 | 1973.02295 | 494.263001 | 4 | 10 | 24.5926 | 7.35  |
| 19 | 31.92 | 34.17 | 40.7 IL1RAP_FlexIII  | 96.8 KYTSEDLKR                      | Label: 13C(6)15N(2)(K)@1; Label: 13C(6)15N(2)(K)@8; Label: 13C(6)15N(4)(R)@9                                         | 0.0072316   | 1100.64734 | 367.8897 | 1100.64002 | 367.887268 | 3 | 9  | 8.9118  | 8.71  |
| 19 | 31.92 | 34.17 | 40.7 IL1RAP_FlexIII  | 96.8 TQILSIKK                       | Label: 13C(6)15N(2)(K)@7; Label: 13C(6)15N(2)(K)@8                                                                   | -0.00095687 | 945.618469 | 473.8165 | 945.619385 | 473.816956 | 2 | 9  | 12.5793 | 8.71  |
| 40 | 20.03 | 22.17 | 74.7 C3ORF10_FlexIII | 96.8 RIEYIEAR                       | Label: 13C(6)15N(4)(R)@2; Label: 13C(6)15N(4)(R)@8                                                                   | 0.00109873  | 1068.58411 | 357.202  | 1068.58313 | 357.20163  | 3 | 9  | 13.0666 | 28.59 |
| 5  | 57.74 | 59.78 | 79.0 CCND1_FlexIII   | 96.7 VIKCDPDCLR                     | Label: 13C(6)15N(2)(K)@3; Propionamide(C)@4; Propionamide(C)@8; Label: 13C(6)15N(4)(R)@10                            | 0.00148128  | 1320.66638 | 441.2294 | 1320.66492 | 441.228912 | 3 | 9  | 12.354  | 30.90 |
| 40 | 20.03 | 22.17 | 74.7 C3ORF10_FlexIII | 96.7 IEYIEAR                        | Label: 13C(6)15N(4)(R)@7                                                                                             | 0.0013206   | 902.475098 | 452.2448 | 902.473894 | 452.244141 | 2 | 8  | 13.0859 | 28.59 |
| 1  | 72.6  | 72.6  | 57.2 ZAP70_FlexIII   | 96.6 MKGPEVMAFIEQKG                 | Label: 13C(6)15N(2)(K)@2; Deamidated(Q)@12; Label: 13C(6)15N(2)(K)@14                                                | 0.0153998   | 1580.80664 | 791.4106 | 1580.79138 | 791.402954 | 2 | 10 | 16.6785 | 34.38 |
| 28 | 25.1  | 27.19 | 50.3 CIDEB_FlexIII   | 96.6 RVTWSAPPPQRPFR                 | Label: 13C(6)15N(4)(R)@1; Label: 13C(6)15N(4)(R)@11; Label: 13C(6)15N(4)(R)@14                                       | -0.00797523 | 1723.93335 | 431.9906 | 1723.94128 | 431.992615 | 4 | 10 | 13.0599 | 5.63  |
| 5  | 57.74 | 59.78 | 79.0 CCND1_FlexIII   | 96.5 AYPDANLLNDR                    | Label: 13C(6)15N(4)(R)@11                                                                                            | -0.0004237  | 1270.61768 | 636.3161 | 1270.61816 | 636.316345 | 2 | 9  | 14.4239 | 30.90 |
| 10 | 48.28 | 50.28 | 79.7 YWHAQ_FlexIII   | 96.5 NLLSVAKY                       |                                                                                                                      | 0.00269575  | 906.520264 | 454.2674 | 906.517456 | 454.266022 | 2 | 9  | 14.5081 | 54.97 |
| 19 | 31.92 | 34.17 | 40.7 IL1RAP_FlexIII  | 96.5 KYTSEDLKR                      | Label: 13C(6)15N(2)(K)@1; Label: 13C(6)15N(2)(K)@8; Label: 13C(6)15N(4)(R)@9                                         | 0.0072316   | 1100.64734 | 367.8897 | 1100.64002 | 367.887268 | 3 | 8  | 9.4441  | 8.71  |
| 24 | 27.17 | 29.2  | 66.8 ICOSLG_FlexIII  | 96.5 TVVTYHIPONSSLENVDNR            | Deamidated(N)@10; Label: 13C(6)15N(4)(R)@19                                                                          | 0.00983027  | 2169.06763 | 724.0298 | 2169.05786 | 724.02655  | 3 | 6  | 26.2509 | 29.99 |
| 6  | 55.92 | 58    | 59.7 MAPK10_FlexIII  | 96.5 MLVIDPAKR                      | Label: 13C(6)15N(2)(K)@8; Label: 13C(6)15N(4)(R)@9                                                                   | -0.00069254 | 1059.62219 | 354.2147 | 1059.62293 | 354.214935 | 3 | 9  | 13.3609 | 7.35  |
| 6  | 55.92 | 58    | 59.7 MAPK10_FlexIII  | 96.5 TAGTSMFMTPYVVTR                | Label: 13C(6)15N(4)(R)@15                                                                                            | 0.00097718  | 1670.80444 | 836.4095 | 1670.80359 | 836.409058 | 2 | 6  | 25.6919 | 7.35  |
| 6  | 55.92 | 58    | 59.7 MAPK10_FlexIII  | 96.5 YAGLTFPK                       |                                                                                                                      | -0.00044832 | 895.479858 | 448.7472 | 895.480347 | 448.747467 | 2 | 9  | 14.6181 | 7.35  |
| 17 | 34.24 | 36.26 | 47.8 SFRP4_FlexIII   | 96.5 RYVPTFLYK                      | Label: 13C(6)15N(4)(R)@1; Label: 13C(6)15N(2)(K)@9                                                                   | 0.00061426  | 1203.67773 | 402.2332 | 1203.67712 | 402.232971 | 3 | 9  | 15.2739 | 3.71  |
| 27 | 25.18 | 29.37 | 75.4 RBP5_FlexIII    | 96.5 VRYPTFLYK                      | Label: 13C(6)15N(4)(R)@2; Label: 13C(6)15N(2)(K)@9                                                                   | 0.00061426  | 1203.67773 | 402.2332 | 1203.67712 | 402.232971 | 3 | 9  | 15.2739 | 22.16 |
| 17 | 34.24 | 36.26 | 47.8 SFRP4_FlexIII   | 96.4 ARDDCEPLMK                     | Label: 13C(6)15N(4)(R)@2; Propionamide(C)@5; Label: 13C(6)15N(2)(K)@10                                               | -0.00079234 | 1265.58545 | 422.8691 | 1265.5863  | 422.869385 | 3 | 10 | 12.0592 | 3.71  |
| 17 | 34.24 | 36.26 | 47.8 SFRP4_FlexIII   | 96.4 ARDDCEPLMK                     | Label: 13C(6)15N(4)(R)@2; Propionamide(C)@5; Label: 13C(6)15N(2)(K)@10                                               | 0.00186269  | 1265.58814 | 422.87   | 1265.5863  | 422.869385 | 3 | 10 | 12.6183 | 3.71  |
| 6  | 55.92 | 58    | 59.7 MAPK10_FlexIII  | 96.3 ILDFGLAR                       | Label: 13C(6)15N(4)(R)@8                                                                                             | -0.00058361 | 913.525452 | 457.77   | 913.526062 | 457.770325 | 2 | 6  | 26.3974 | 7.35  |
| 19 | 31.92 | 34.17 | 40.7 IL1RAP_FlexIII  | 96.3 NEVVWTTIDGK                    | Label: 13C(6)15N(2)(K)@10                                                                                            | 0.00063895  | 1254.61304 | 628.3138 | 1254.61243 | 628.313477 | 2 | 10 | 16.435  | 8.71  |
| 5  | 57.74 | 59.78 | 79.0 CCND1_FlexIII   | 96.2 MKETIPLTAEK                    | Oxidation(M)@1; Label: 13C(6)15N(2)(K)@2; Label: 13C(6)15N(2)(K)@11                                                  | -0.0164757  | 1291.6864  | 431.5694 | 1291.70288 | 431.57489  | 3 | 9  | 13.0559 | 30.90 |
| 15 | 38    | 42.06 | 61.3 CCDC132_FlexIII | 96.2 VPGKEEFLR                      | Label: 13C(6)15N(2)(K)@4; Label: 13C(6)15N(4)(R)@8                                                                   | 0.00034161  | 978.525696 | 490.2701 | 978.52533  | 490.269959 | 2 | 9  | 11.3412 | 8.81  |
| 6  | 55.92 | 58    | 59.7 MAPK10_FlexIII  | 96.2 ILDFGLAR                       | Label: 13C(6)15N(4)(R)@8                                                                                             | -0.00076672 | 913.525269 | 457.7699 | 913.526062 | 457.770325 | 2 | 5  | 27.5677 | 7.35  |
| 17 | 34.24 | 36.26 | 47.8 SFRP4_FlexIII   | 96.1 MYNHSWPESLACDELVPYDR           | Oxidation(M)@1; Deamidated(N)@3; Propionamide(C)@12; Label: 13C(6)15N(4)(R)@20                                       | 0.00070653  | 2522.07666 | 841.6995 | 2522.07568 | 841.699219 | 3 | 11 | 17.5183 | 3.71  |
| 17 | 34.24 | 36.26 | 47.8 SFRP4_FlexIII   | 96.1 VKPTLATYLSK                    | Label: 13C(6)15N(2)(K)@2; Label: 13C(6)15N(2)(K)@11                                                                  | 0.00110105  | 1235.74731 | 618.8809 | 1235.74597 | 618.88031  | 2 | 10 | 16.7975 | 3.71  |
| 28 | 25.1  | 27.19 | 50.3 CIDEB_FlexIII   | 96.1 SGVLSYGLGR                     | Label: 13C(6)15N(4)(R)@10                                                                                            | 0.00180374  | 1017.54999 | 340.1906 | 1017.54828 | 340.190033 | 3 | 9  | 13.5898 | 5.63  |
| 1  | 72.6  | 72.6  | 57.2 ZAP70_FlexIII   | 96.1 ACYYSLASK                      | Propionamide(C)@2; Label: 13C(6)15N(2)(K)@9                                                                          | -0.00093001 | 1083.51404 | 542.7643 | 1083.51502 | 542.764771 | 2 | 9  | 13.2682 | 34.38 |
| 16 | 34.39 | 36.39 | 70.4 HAVCR2_FlexIII  | 96.0 YWLNGDFR                       | Label: 13C(6)15N(4)(R)@8                                                                                             | -0.00163445 | 1079.50464 | 540.7596 | 1079.50635 | 540.760498 | 2 | 8  | 15.8057 | 14.84 |
| 19 | 31.92 | 34.17 | 40.7 IL1RAP_FlexIII  | 95.8 QIQVFEDEPAR                    | Label: 13C(6)15N(4)(R)@11                                                                                            | -0.00059993 | 1340.65942 | 671.337  | 1340.66003 | 671.33728  | 2 | 10 | 14.2431 | 8.71  |
| 19 | 31.92 | 34.17 | 40.7 IL1RAP_FlexIII  | 95.8 QIQVFEDEPAR                    | Label: 13C(6)15N(4)(R)@11                                                                                            | 0.00049871  | 1340.66052 | 671.3375 | 1340.66003 | 671.33728  | 2 | 10 | 15.8123 | 8.71  |
| 10 | 48.28 | 50.28 | 79.7 YWHAQ_FlexIII   | 95.7 YDDMATCMK                      | Propionamide(C)@7; Oxidation(M)@8; Label: 13C(6)15N(2)(K)@9                                                          | 0.00248514  | 1171.44653 | 586.7305 | 1171.44397 | 586.729248 | 2 | 9  | 11.7466 | 54.97 |
| 16 | 34.39 | 36.39 | 70.4 HAVCR2_FlexIII  | 95.6 IOIIGIMDEKFNLK                 | Label: 13C(6)15N(2)(K)@11; Label: 13C(6)15N(2)(K)@15                                                                 | -0.00549169 | 1774.95667 | 592.6595 | 1774.96228 | 592.661377 | 3 | 9  | 18.3499 | 14.84 |
| 1  | 72.6  | 72.6  | 57.2 ZAP70_FlexIII   | 95.6 LIATTAAHR                      | Label: 13C(6)15N(4)(R)@9                                                                                             | 0.00108278  | 1020.56018 | 341.194  | 1020.55914 | 341.193665 | 3 | 8  | 10.7651 | 34.38 |
| 13 | 39.97 | 41.97 | 60.7 TREM1_FlexIII   | 95.5 EGOTLDVK                       | Label: 13C(6)15N(2)(K)@8                                                                                             | 0.0003759   | 896.469849 | 449.2422 | 896.469482 | 449.242004 | 2 | 8  | 11.996  | 38.93 |
| 28 | 25.1  | 27.19 | 50.3 CIDEB_FlexIII   | 95.5 SGVLSYGLGR                     | Label: 13C(6)15N(4)(R)@10                                                                                            | -0.00160526 | 1017.54669 | 509.7806 | 1017.54828 | 509.781403 | 2 | 8  | 17.753  | 5.63  |
| 39 | 20.26 | 24.3  | 50.4 MUC15_FlexIII   | 95.5 DGIPMDDIPPLR                   | Label: 13C(6)15N(4)(R)@12                                                                                            | -0.00724116 | 1347.68602 | 674.8403 | 1347.67322 | 674.843872 | 2 | 9  | 17.4154 | 14.27 |
| 19 | 31.92 | 34.17 | 40.7 IL1RAP_FlexIII  | 95.5 TQILSIK                        | Label: 13C(6)15N(2)(K)@7                                                                                             | -0.00523975 | 809.       |          |            |            |   |    |         |       |

|     |       |       |                      |                                     |                                                                                                                  |                              |             |             |          |            |            |   |    |         |       |
|-----|-------|-------|----------------------|-------------------------------------|------------------------------------------------------------------------------------------------------------------|------------------------------|-------------|-------------|----------|------------|------------|---|----|---------|-------|
| 19  | 31.92 | 34.17 | 40.7 IL1RAP_FlexIII  | 95.1 DSCFNSPMKLPVHK                 | Propionamide(C)@3; Label:13C(6)15N(2)(K)@9; Label:13C(6)15N(2)(K)@14                                             | missed K-L@9                 | 0.0151087   | 1688.8501   | 423.2198 | 1688.83496 | 423.216003 | 4 | 10 | 15.1838 | 8.71  |
| 19  | 31.92 | 34.17 | 40.7 IL1RAP_FlexIII  | 95.1 DSCFNSPMKLPVHK                 | Propionamide(C)@3; Label:13C(6)15N(2)(K)@9; Label:13C(6)15N(2)(K)@14                                             | missed K-L@9                 | 0.00029294  | 1688.83496  | 563.9523 | 1688.83496 | 563.952271 | 3 | 10 | 15.2153 | 8.71  |
| 19  | 31.92 | 34.17 | 40.7 IL1RAP_FlexIII  | 95.1 TOILSIK                        | Label:13C(6)15N(2)(K)@7                                                                                          |                              | -0.00163867 | 809.508667  | 405.7616 | 809.510193 | 405.76239  | 2 | 8  | 13.8015 | 8.71  |
| 1   | 72.6  | 72.6  | 57.2 ZAP70_FlexIII   | 95.1 MPWYHSSLTR                     | Label:13C(6)15N(4)(R)@10                                                                                         |                              | -0.00147819 | 1286.60925  | 429.877  | 1286.6106  | 429.877472 | 3 | 9  | 13.9276 | 34.38 |
| 1   | 72.6  | 72.6  | 57.2 ZAP70_FlexIII   | 95.1 MPWYHSSLTR                     | Label:13C(6)15N(4)(R)@10                                                                                         |                              | -0.00392577 | 1286.60669  | 644.3106 | 1286.6106  | 644.312561 | 2 | 9  | 14.2325 | 34.38 |
| 1   | 72.6  | 72.6  | 57.2 ZAP70_FlexIII   | 95.1 MPWYHSSLTR                     | Label:13C(6)15N(4)(R)@10                                                                                         |                              | -0.00148436 | 1286.60913  | 644.3118 | 1286.6106  | 644.312561 | 2 | 9  | 16.2181 | 34.38 |
| 17  | 34.24 | 36.26 | 47.8 SFRP4_FlexIII   | 95.1 WRDQLSKR                       | Label:13C(6)15N(4)(R)@2; Label:13C(6)15N(2)(K)@7; Label:13C(6)15N(4)(R)@8                                        | missed R-D@2; missed K-R@7   | -0.0010027  | 1115.61841  | 372.8801 | 1115.61939 | 372.880402 | 3 | 9  | 11.2191 | 3.71  |
| 24  | 27.17 | 29.2  | 66.8 ICOSLG_FlexIII  | 95.1 ALMSPAGMLR                     | Label:13C(6)15N(4)(R)@10                                                                                         |                              | -0.00349626 | 1055.54602  | 528.7803 | 1055.54966 | 528.782044 | 2 | 9  | 15.8899 | 29.99 |
| 13  | 39.97 | 41.97 | 60.7 TREM1_FlexIII   | 94.6 IPPTTTK                        | Label:13C(6)15N(2)(K)@7                                                                                          |                              | -0.00030809 | 764.452087  | 383.2333 | 764.452332 | 383.23346  | 2 | 7  | 10.21   | 38.93 |
| 16  | 34.39 | 36.39 | 70.4 HAVCR2_FlexIII  | 94.8 LANDLRDSGATIR                  | Label:13C(6)15N(4)(R)@6; Label:13C(6)15N(4)(R)@13                                                                | missed R-D@6                 | 0.00152663  | 1420.75501  | 474.5923 | 1420.75378 | 474.591858 | 3 | 9  | 12.6719 | 14.84 |
| 16  | 34.39 | 36.39 | 70.4 HAVCR2_FlexIII  | 94.8 TDERDVNYWTSR                   | Label:13C(6)15N(4)(R)@4; Label:13C(6)15N(4)(R)@12                                                                | missed R-D@4                 | -0.00997645 | 1560.69727  | 521.2397 | 1560.70715 | 521.242981 | 3 | 9  | 14.0041 | 14.84 |
| 10  | 48.28 | 50.28 | 79.7 YWHAQ_FlexIII   | 94.7 YDDMATCMK                      | Oxidation(M)@4; Propionamide(C)@7; Oxidation(M)@8; Label:13C(6)15N(2)(K)@9                                       |                              | 0.00752802  | 1187.44653  | 594.7305 | 1187.43884 | 594.726685 | 2 | 9  | 12.7916 | 54.97 |
| 15  | 38    | 42.06 | 61.3 CCDC132_FlexIII | 94.6 SPQESLSDLGAIESLRVPGKEEFR       | Label:13C(6)15N(4)(R)@16; Label:13C(6)15N(2)(K)@20; Label:13C(6)15N(4)(R)@24                                     | missed R-V@16; missed K-E@20 | 0.00872493  | 2671.38989  | 891.4706 | 2671.3811  | 891.467651 | 3 | 10 | 16.3352 | 8.81  |
| 13  | 39.97 | 41.97 | 60.7 TREM1_FlexIII   | 94.6 ALCPPLYTSPR                    | Propionamide(C)@3; Label:13C(6)15N(4)(R)@10                                                                      |                              | 0.00468925  | 1200.62463  | 601.3196 | 1200.62    | 601.317322 | 2 | 9  | 14.4778 | 38.93 |
| 13  | 39.97 | 41.97 | 60.7 TREM1_FlexIII   | 94.6 ILEDYHDHGLLR                   | Label:13C(6)15N(4)(R)@13                                                                                         |                              | 0.0113888   | 1602.85095  | 401.72   | 1602.83936 | 401.717102 | 4 | 6  | 26.1219 | 38.93 |
| 17  | 34.24 | 36.26 | 47.8 SFRP4_FlexIII   | 94.5 GKPPAPKPAASK                   | Label:13C(6)15N(2)(K)@2; Label:13C(6)15N(2)(K)@7; Label:13C(6)15N(2)(K)@12                                       |                              | -0.00130814 | 1197.727815 | 400.25   | 1197.72961 | 400.250458 | 3 | 9  | 10.4301 | 3.71  |
| 17  | 34.24 | 36.26 | 47.8 SFRP4_FlexIII   | 94.5 RVYPTFLYK                      | Label:13C(6)15N(4)(R)@1; Label:13C(6)15N(2)(K)@9                                                                 | missed R-V@1                 | 0.00061426  | 1203.67773  | 402.2332 | 1203.67712 | 402.232971 | 3 | 9  | 14.4716 | 3.71  |
| 19  | 31.92 | 34.17 | 40.7 IL1RAP_FlexIII  | 94.5 QIQVFEEDEPAR                   | Gln->pyro-Glu@N-term; Label:13C(6)15N(4)(R)@11                                                                   |                              | 3.45E-05    | 1323.63342  | 662.824  | 1323.63342 | 662.823975 | 2 | 10 | 15.9728 | 8.71  |
| 27  | 25.18 | 29.37 | 75.4 RBP5_FlexIII    | 94.5 DAVCEQVFR                      | Propionamide(C)@4; Label:13C(6)15N(4)(R)@9                                                                       |                              | -0.00013043 | 1146.53662  | 574.2756 | 1146.53674 | 574.275635 | 2 | 9  | 13.7562 | 22.16 |
| 27  | 25.18 | 29.37 | 75.4 RBP5_FlexIII    | 94.5 VRYPTFLYK                      | Label:13C(6)15N(4)(R)@2; Label:13C(6)15N(2)(K)@9                                                                 | missed R-Y@2                 | 0.00061426  | 1203.67773  | 402.2332 | 1203.67712 | 402.232971 | 3 | 9  | 14.4716 | 22.16 |
| 171 | 0.42  | 2.52  | 65.0 HIF1AN_FlexIII  | 94.8 GRYNPYTFLYK                    | Label:13C(6)15N(4)(R)@2; Label:13C(6)15N(2)(K)@11                                                                | missed R-Y@2                 | 0.00067868  | 1438.73706  | 480.5863 | 1438.73645 | 480.58609  | 3 | 9  | 15.2007 | 25.53 |
| 15  | 38    | 42.06 | 61.3 CCDC132_FlexIII | 94.4 VPGKEEFR                       | Label:13C(6)15N(2)(K)@4; Label:13C(6)15N(4)(R)@8                                                                 | missed K-E@4                 | 0.00034161  | 978.525696  | 490.2701 | 978.52533  | 490.269959 | 2 | 9  | 11.6115 | 8.81  |
| 39  | 20.26 | 24.3  | 50.4 MUC15_FlexIII   | 94.3 DGIPMDIPPLR                    | Label:13C(6)15N(4)(R)@12                                                                                         |                              | -0.00174801 | 1347.67151  | 674.843  | 1347.67322 | 674.843872 | 2 | 9  | 16.2342 | 14.27 |
| 39  | 20.26 | 24.3  | 50.4 MUC15_FlexIII   | 94.3 DGIPMDIPPLR                    | Label:13C(6)15N(4)(R)@12                                                                                         |                              | -0.00028317 | 1347.6731   | 674.8438 | 1347.67322 | 674.843872 | 2 | 9  | 16.9634 | 14.27 |
| 39  | 20.26 | 24.3  | 50.4 MUC15_FlexIII   | 94.3 TMENKPISESEANLNSDENITTSNLK     | Label:13C(6)15N(2)(K)@5; Deamidated(N)@14; Label:13C(6)15N(2)(K)@19; Label:13C(6)15N(2)(K)@28                    | missed K-E@19                | 0.0155071   | 3144.57129  | 787.1501 | 3144.55591 | 787.14624  | 4 | 10 | 18.3917 | 14.27 |
| 13  | 39.97 | 41.97 | 60.7 TREM1_FlexIII   | 94.2 ALCPLYTSPR                     | Propionamide(C)@3; Label:13C(6)15N(4)(R)@10                                                                      |                              | -0.00092598 | 1200.61902  | 601.3168 | 1200.62    | 601.317322 | 2 | 9  | 13.9398 | 38.93 |
| 13  | 39.97 | 41.97 | 60.7 TREM1_FlexIII   | 94.2 IPPTTTK                        | Label:13C(6)15N(2)(K)@7                                                                                          |                              | 5.81E-05    | 764.452454  | 383.2335 | 764.452332 | 383.23346  | 2 | 7  | 9.6984  | 38.93 |
| 13  | 39.97 | 41.97 | 60.7 TREM1_FlexIII   | 94.2 TLACTERPSK                     | Propionamide(C)@4; Label:13C(6)15N(4)(R)@7; Label:13C(6)15N(2)(K)@10                                             |                              | -0.00123877 | 1193.61816  | 398.88   | 1193.61939 | 398.880371 | 3 | 9  | 10.5841 | 38.93 |
| 13  | 39.97 | 41.97 | 60.7 TREM1_FlexIII   | 94.2 TLACTERPSK                     | Propionamide(C)@4; Label:13C(6)15N(4)(R)@7; Label:13C(6)15N(2)(K)@10                                             |                              | 0.00022607  | 1193.61963  | 398.8805 | 1193.61939 | 398.880371 | 3 | 9  | 11.2411 | 38.93 |
| 31  | 24.39 | 28.22 | 36.2 ARPC5_FlexIII   | 94.2 ALAAGVGGSIVR                   | Label:13C(6)15N(4)(R)@12                                                                                         |                              | -0.00679108 | 1079.62585  | 540.8202 | 1079.63269 | 540.823608 | 2 | 7  | 23.3266 | 36.87 |
| 19  | 31.92 | 34.17 | 40.7 IL1RAP_FlexIII  | 94.2 KVTSEDLKR                      | Label:13C(6)15N(2)(K)@1; Label:13C(6)15N(2)(K)@8; Label:13C(6)15N(4)(R)@9                                        | missed K-V@1; missed K-R@8   | 0.0072316   | 1100.64734  | 367.8897 | 1100.64002 | 367.887268 | 3 | 8  | 10.404  | 8.71  |
| 19  | 31.92 | 34.17 | 40.7 IL1RAP_FlexIII  | 94.2 TOILSIKK                       | Label:13C(6)15N(2)(K)@7; Label:13C(6)15N(2)(K)@8                                                                 | missed K-K@7                 | -0.0125389  | 945.606934  | 316.2096 | 945.619385 | 316.213745 | 3 | 8  | 12.5649 | 8.71  |
| 26  | 25.25 | 27.61 | 59.3 HOXC9_FlexIII   | 93.9 VLNALTER                       | Label:13C(6)15N(4)(R)@7                                                                                          |                              | -0.00131297 | 853.488464  | 427.7515 | 853.498685 | 427.752106 | 2 | 8  | 13.4683 | 9.65  |
| 13  | 39.97 | 41.97 | 60.7 TREM1_FlexIII   | 93.9 ALCPLYTSPR                     | Propionamide(C)@3; Label:13C(6)15N(4)(R)@10                                                                      |                              | 0.00060694  | 1200.62073  | 601.3176 | 1200.62    | 601.317322 | 2 | 9  | 24.408  | 38.93 |
| 40  | 20.03 | 22.17 | 74.7 C3ORF10_FlexIII | 93.8 LTALER                         | Label:13C(6)15N(4)(R)@6                                                                                          |                              | 0.00018058  | 711.415649  | 356.7151 | 711.415466 | 356.714996 | 2 | 7  | 12.278  | 28.59 |
| 28  | 25.1  | 27.19 | 50.3 CIDEB_FlexIII   | 93.7 FTFDVYK                        | Label:13C(6)15N(2)(K)@7                                                                                          |                              | -4.96E-05   | 926.462891  | 464.2387 | 926.462891 | 464.238739 | 2 | 8  | 14.9965 | 5.63  |
| 6   | 55.92 | 58    | 59.7 MAPK10_FlexIII  | 93.6 MLVIDPAKR                      | Label:13C(6)15N(2)(K)@6; Label:13C(6)15N(4)(R)@9                                                                 | missed K-R@8                 | -0.00171737 | 1059.62134  | 354.2144 | 1059.62293 | 354.214935 | 3 | 9  | 13.5001 | 7.35  |
| 9   | 52.97 | 54.97 | 76.9 CLIC2_FlexIII   | 93.6 IEEFLEQTAPPRYPHLSPK            | Deamidated(Q)@7; Label:13C(6)15N(4)(R)@13; Label:13C(6)15N(2)(K)@20                                              | missed R-Y@13                | -0.00233591 | 2383.2522   | 596.8203 | 2383.25415 | 596.820862 | 4 | 10 | 15.0803 | 20.05 |
| 13  | 39.97 | 41.97 | 60.7 TREM1_FlexIII   | 93.3 TLACTERPSKSNHPVQVGR            | Propionamide(C)@4; Label:13C(6)15N(4)(R)@7; Label:13C(6)15N(2)(K)@10; Deamidated(N)@11; Label:13C(6)15N(4)(R)@19 | missed K-N@10                | 0.0134971   | 2179.12964  | 545.7897 | 2179.11621 | 545.786316 | 4 | 10 | 11.6351 | 38.93 |
| 17  | 34.24 | 36.26 | 47.8 SFRP4_FlexIII   | 93.1 SSSPIPR                        | Label:13C(6)15N(4)(R)@7                                                                                          |                              | -5.39E-05   | 752.405701  | 377.2101 | 752.40564  | 377.210083 | 2 | 8  | 11.6967 | 3.71  |
| 19  | 31.92 | 34.17 | 40.7 IL1RAP_FlexIII  | 92.8 DSCFNSPMKLPVHK                 | Propionamide(C)@3; Deamidated(N)@5; Label:13C(6)15N(2)(K)@9; Label:13C(6)15N(2)(K)@14                            | missed K-L@9                 | 0.029402    | 1689.84815  | 564.29   | 1689.81897 | 564.280273 | 3 | 10 | 15.4819 | 8.71  |
| 24  | 27.17 | 29.2  | 66.8 ICOSLG_FlexIII  | 92.8 ADTOKEVFR                      | Label:13C(6)15N(2)(K)@6; Label:13C(6)15N(4)(R)@9                                                                 | missed K-E@6                 | -0.002826   | 1092.55029  | 365.1907 | 1092.55298 | 365.19162  | 3 | 6  | 7.5337  | 29.99 |
| 39  | 20.26 | 24.3  | 50.4 MUC15_FlexIII   | 92.7 DGIPMDIPPLR                    | Label:13C(6)15N(4)(R)@12                                                                                         |                              | -0.00724116 | 1347.66602  | 674.8403 | 1347.67322 | 674.843872 | 2 | 5  | 27.8941 | 14.27 |
| 39  | 20.26 | 24.3  | 50.4 MUC15_FlexIII   | 92.7 RLYDDRNEPVLR                   | Label:13C(6)15N(4)(R)@1; Label:13C(6)15N(4)(R)@6; Label:13C(6)15N(4)(R)@12                                       | missed R-L@1; missed R-N@6   | -0.0175569  | 1574.81335  | 394.7106 | 1574.83069 | 394.714966 | 4 | 9  | 12.4968 | 14.27 |
| 39  | 20.26 | 24.3  | 50.4 MUC15_FlexIII   | 92.7 RLYDDRNEPVLR                   | Label:13C(6)15N(4)(R)@1; Label:13C(6)15N(4)(R)@6; Label:13C(6)15N(4)(R)@12                                       | missed R-L@1; missed R-N@6   | -0.00128414 | 1574.82935  | 525.9504 | 1574.83069 | 525.950867 | 3 | 9  | 12.6774 | 14.27 |
| 1   | 72.6  | 72.6  | 57.2 ZAP70_FlexIII   | 92.5 ALGADDOSYITAR                  | Label:13C(6)15N(4)(R)@12                                                                                         |                              | 0.00957008  | 1311.60689  | 656.8106 | 1311.59705 | 656.805786 | 2 | 5  | 25.9272 | 34.38 |
| 31  | 24.39 | 28.22 | 36.2 ARPC5_FlexIII   | 92.5 KTVYPTFLYK                     | Label:13C(6)15N(2)(K)@1; Label:13C(6)15N(2)(K)@10                                                                | missed K-T@1                 | -0.0118441  | 1274.71265  | 425.9115 | 1274.72461 | 425.915466 | 3 | 9  | 15.1854 | 36.87 |
| 13  | 39.97 | 41.97 | 60.7 TREM1_FlexIII   | 92.4 IPPTTTK                        | Label:13C(6)15N(2)(K)@7                                                                                          |                              | -0.00012498 | 764.452271  | 383.2334 | 764.452332 | 383.23346  | 2 | 7  | 9.4441  | 38.93 |
| 35  | 23.16 | 27.25 | 38.4 CASC4_FlexIII   | 92.3 EQLAELR                        | Label:13C(6)15N(4)(R)@7                                                                                          |                              | -0.00017807 | 867.468872  | 434.7417 | 867.468933 | 434.74176  | 2 | 7  | 13.1471 | 12.19 |
| 19  | 31.92 | 34.17 | 40.7 IL1RAP_FlexIII  | 92.2 SYVCHAR                        | Propionamide(C)@4; Label:13C(6)15N(4)(R)@7                                                                       |                              | -0.00087094 | 915.425049  | 458.7198 | 915.426025 | 458.720306 | 2 | 7  | 8.492   | 8.71  |
| 1   | 72.6  | 72.6  | 57.2 ZAP70_FlexIII   | 92.1 QGTEKADTEEMMR                  | Label:13C(6)15N(2)(K)@5; Label:13C(6)15N(4)(R)@13                                                                | missed K-A@5                 | -0.00764564 | 1542.6698   | 515.2305 | 1542.67737 | 515.233032 | 3 | 9  | 11.7634 | 34.38 |
| 3   | 59.71 | 61.81 | 49.8 VANGL1_FlexIII  | 92.0 FYSLGHLSIQR                    | Label:13C(6)15N(2)(K)@1; Label:13C(6)15N(2)(K)@8                                                                 |                              | -0.00872229 | 1319.70728  | 440.9097 | 1319.69861 | 440.906683 | 3 | 9  | 14.5845 | 19.55 |
| 3   | 59.71 | 61.81 | 49.8 VANGL1_FlexIII  | 92.0 FYSLGHLSIQR                    | Label:13C(6)15N(4)(R)@11                                                                                         |                              | -0.00171271 | 1329.70508  | 444.2423 | 1329.70691 | 444.24292  | 3 | 9  | 14.755  | 19.55 |
| 28  | 25.1  | 27.19 | 50.3 CIDEB_FlexIII   | 91.9 SGVLVGLGR                      | Label:13C(6)15N(4)(R)@10                                                                                         |                              | 0.00217892  | 1017.55048  | 509.7825 | 1017.54828 | 509.781403 | 2 | 7  | 24.685  | 5.63  |
| 6   | 55.92 | 58    | 59.7 MAPK10_FlexIII  | 91.6 ILDFGLAR                       | Label:13C(6)15N(4)(R)@8                                                                                          |                              | 0.00020985  | 913.526245  | 457.7704 | 913.526062 | 457.770325 | 2 | 7  | 19.0132 | 7.35  |
| 6   | 55.92 | 58    | 59.7 MAPK10_FlexIII  | 91.6 ILDFGLAR                       | Label:13C(6)15N(4)(R)@8                                                                                          |                              | -0.0002174  | 913.525879  | 457.7702 | 913.526062 | 457.770325 | 2 | 7  | 19.3676 | 7.35  |
| 3   | 59.71 | 61.81 | 49.8 VANGL1_FlexIII  | 91.6 TEEVQDDNWGETTATITGSEHSIQSIEDAR | Deamidated(N)@8; Label:13C(6)15N(4)(R)@31                                                                        |                              | 0.0215424   | 3430.53833  | 1144.52  | 3430.51587 | 1144.51257 | 3 | 8  | 24.5494 | 19.55 |
| 17  | 34.24 | 36.26 | 47.8 SFRP4_FlexIII   | 91.5 WIDITPDMMVQERPLDVCKR           | Label:13C(6)15N(4)(R)@13; Propionamide(C)@19; Label:13C(6)15N(2)(K)@20; Label:13C(6)15N(4)(R)@21                 | missed K-R@20                | -0.00659354 | 2658.2898   | 665.5797 | 2658.29614 | 665.58136  | 4 | 10 | 17.9871 | 3.71  |
| 35  | 23.16 | 27.25 | 38.4 CASC4           |                                     |                                                                                                                  |                              |             |             |          |            |            |   |    |         |       |

|    |       |       |                      |                         |                                                                                                           |                              |             |            |          |            |            |   |    |         |       |
|----|-------|-------|----------------------|-------------------------|-----------------------------------------------------------------------------------------------------------|------------------------------|-------------|------------|----------|------------|------------|---|----|---------|-------|
| 17 | 34.24 | 36.26 | 47.8 SFRP4_FlexIII   | 89.5 SIQWEER            | Label:13C(6)15N(4)(R)@7                                                                                   |                              | 0.00616925  | 956.465271 | 479.2399 | 956.459106 | 479.236847 | 2 | 9  | 13.2755 | 3.71  |
| 27 | 25.18 | 29.37 | 75.4 RBP5_FlexIII    | 89.5 GEVPNR             | Label:13C(6)15N(4)(R)@6                                                                                   |                              | -0.00151971 | 680.34668  | 341.1806 | 680.348084 | 341.181335 | 2 | 6  | 8.1679  | 22.16 |
| 13 | 39.97 | 41.97 | 60.7 TREM1_FlexIII   | 89.4 IILEDYHDHGLLR      | Label:13C(6)15N(4)(R)@13                                                                                  |                              | 0.00174522  | 1602.84131 | 401.7176 | 1602.83936 | 401.717102 | 4 | 9  | 15.4919 | 38.93 |
| 13 | 39.97 | 41.97 | 60.7 TREM1_FlexIII   | 89.4 IPPTTTK            | Label:13C(6)15N(2)(K)@7                                                                                   |                              | -0.00030809 | 764.452087 | 383.2333 | 764.452332 | 383.23346  | 2 | 7  | 10.4744 | 38.93 |
| 19 | 31.92 | 34.17 | 40.7 IL1RAP_FlexIII  | 89.3 NAVPPVIHSPNDHVVYEK | Deamidated(N) @1; Label:13C(6)15N(2)(K)@18                                                                |                              | 0.0252526   | 2023.0509  | 506.77   | 2023.02539 | 506.763641 | 4 | 10 | 13.0602 | 8.71  |
| 27 | 25.18 | 29.37 | 75.4 RBP5_FlexIII    | 89.2 KCQTIVTWEEEHLCVCQK | Label:13C(6)15N(2)(K)@1; Propionamide(C)@2; Deamidated(Q)@3; Propionamide(C)@15; Label:13C(6)15N(2)(K)@18 | missed K-C@1                 | 0.0128293   | 2331.17017 | 583.7998 | 2331.15747 | 583.796631 | 4 | 10 | 15.265  | 22.16 |
| 19 | 31.92 | 34.17 | 40.7 IL1RAP_FlexIII  | 89.1 KVTSEDLKR          | Label:13C(6)15N(2)(K)@1; Label:13C(6)15N(2)(K)@8; Label:13C(6)15N(4)(R)@9                                 | missed K-V@1; missed K-R@8   | 0.0072316   | 1100.64734 | 367.8897 | 1100.64002 | 367.887268 | 3 | 8  | 9.181   | 8.71  |
| 15 | 38    | 42.06 | 61.3 CCDC132_FlexIII | 88.9 VADLILEKOPAYVK     | Label:13C(6)15N(2)(K)@8; Deamidated(Q)@9; Label:13C(6)15N(2)(K)@14                                        | missed K-Q@8                 | 0.0260367   | 1602.94653 | 802.4805 | 1602.92041 | 802.467468 | 2 | 10 | 14.1726 | 8.81  |
| 16 | 34.39 | 36.39 | 70.4 HAVCR2_FlexIII  | 88.7 DFTAFFPR           | Label:13C(6)15N(4)(R)@8                                                                                   |                              | 0.00660967  | 933.465088 | 467.7398 | 933.458374 | 467.736481 | 2 | 8  | 15.6213 | 14.84 |
| 24 | 27.17 | 29.2  | 66.8 ICOSLG_FlexIII  | 88.4 ALMSPAGMLR         | Label:13C(6)15N(4)(R)@10                                                                                  |                              | 0.00187482  | 1055.55151 | 528.783  | 1055.54956 | 528.782044 | 2 | 7  | 24.3654 | 29.99 |
| 24 | 27.17 | 29.2  | 66.8 ICOSLG_FlexIII  | 88.4 GLYDVVSVLR         | Label:13C(6)15N(4)(R)@10                                                                                  |                              | 0.0087409   | 1129.64587 | 565.8302 | 1129.63709 | 565.825806 | 2 | 8  | 18.4428 | 29.99 |
| 6  | 55.92 | 58    | 59.7 MAPK10_FlexIII  | 88.4 ILDFGLAR           | Label:13C(6)15N(4)(R)@8                                                                                   |                              | -0.00040051 | 913.525696 | 457.7701 | 913.526062 | 457.770325 | 2 | 5  | 28.853  | 7.35  |
| 7  | 55.61 | 59.66 | 62.8 HCFC1_FlexIII   | 88.3 ESHTAVVYTEKDNKK    | Label:13C(6)15N(2)(K)@11; Label:13C(6)15N(2)(K)@14; Label:13C(6)15N(2)(K)@15                              | missed K-D@11; missed K-K@14 | -0.00593582 | 1771.91065 | 355.3894 | 1771.91663 | 355.390625 | 5 | 9  | 10.0406 | 10.99 |
| 7  | 55.61 | 59.66 | 62.8 HCFC1_FlexIII   | 88.3 LLVFGGMVEYGK       | Label:13C(6)15N(2)(K)@12                                                                                  |                              | 0.00140947  | 1319.70532 | 660.8599 | 1319.70386 | 660.859253 | 2 | 9  | 17.4624 | 10.99 |
| 7  | 55.61 | 59.66 | 62.8 HCFC1_FlexIII   | 88.3 SLHSATTIGNK        | Label:13C(6)15N(2)(K)@11                                                                                  |                              | -0.00109195 | 1135.60645 | 568.8105 | 1135.60767 | 568.811096 | 2 | 9  | 11.8103 | 10.99 |
| 19 | 31.92 | 34.17 | 40.7 IL1RAP_FlexIII  | 88.2 NEVWWTIDGK         | Label:13C(6)15N(2)(K)@10                                                                                  |                              | -0.00656321 | 1254.60584 | 628.3102 | 1254.61243 | 628.313477 | 2 | 9  | 16.1683 | 8.71  |
| 22 | 28.89 | 30.92 | 54.1 LYVE1_FlexIII   | 88.1 KVPVSR             | Label:13C(6)15N(2)(K)@1; Label:13C(6)15N(4)(R)@6                                                          | missed K-V@1                 | -0.00552829 | 702.445252 | 352.2299 | 702.450745 | 352.232636 | 2 | 6  | 7.4861  | 16.47 |
