# Supplementary material
Source: PubMed Central journal article supplement (PMC4350037)
Supplement: supp_M114.044321_mcp.M114.044321-4.pdf [file supp_M114.044321_mcp.M114.044321-4.pdf]

**Supplementary Table 3. Evaluation of different machine learning approaches' prediction power on training dataset.**

|                        | Apparent error rate                   |                         |
|------------------------|---------------------------------------|-------------------------|
|                        | 10X cross validation on training data | Human whole cell lysate |
| Support Vector Machine | 0.28                                  | 0.4                     |
| Random Forest          | 0.23                                  | 0.33                    |
| Neural network         | 0.23                                  | 0.27                    |

**Supplementary Table 4. Neural network model training.** We started by training the model with all 544 physicochemical features and 20 amino acid counts. Then we remove highly redundant features and used 120 physicochemical features and 20 amino acid counts. Subsequently, backward feature selection was used to reduce the features in half in each step by feature importance. In addition, we also used forward selection to construct feature sets at each step by selecting from unused features that added most weight to the model. Finally, the features showing in both selection methods, were combined to form the 15 final features. In the feature selection step, we applied filtering using sequence coverage and abundance to remove very lowly expressed proteins. Lastly, protein abundance was introduced into the model and the filtering conditions were removed. For model evaluation, we divided the reported probability score into 10 equally spaced bins and computed the ratio of peptides detected [ratio], in terms of *in silico* peptides falling into this category [bin.pep] that are actually detected [detected] in each category. When performance statistics were reported, we used two methods. In the first method [2-Part], we use a cutoff score of 0.5 and treated every *in silico* peptide with a score less than that as not detected. In the second method[3-Part], the divide the peptides into three equal portions we removed the middle portion since this portion mainly contained ambiguous peptides in terms of being detected or not detected. (Var #: Number of features, cov: minimum sequence coverage [%], fmol: minimum absolute amount on column [fmol/column]).

|                                           | Var#   | # peptides |          |          | PPA score bins |      |      |      |      |      |      |      |      |      | Filter |      | Type   | Sensitivity | Specificity | Precision | Accuracy |
|-------------------------------------------|--------|------------|----------|----------|----------------|------|------|------|------|------|------|------|------|------|--------|------|--------|-------------|-------------|-----------|----------|
|                                           |        | Total      | Detected |          | 0.1            | 0.2  | 0.3  | 0.4  | 0.5  | 0.6  | 0.7  | 0.8  | 0.9  | 1    | cov    | fmol |        |             |             |           |          |
| All features                              | 564    | 2075       | 1129     | bin.pep  | 487            | 56   | 42   | 44   | 158  | 175  | 295  | 466  | 296  | 56   | 20     | 7    | 2-Part | 0.9         | 0.55        | 0.71      | 0.74     |
|                                           |        |            |          | detected | 59             | 21   | 14   | 15   | 95   | 111  | 199  | 338  | 233  | 44   |        |      | 3-Part | 0.83        | 0.76        | 0.76      | 0.79     |
|                                           |        |            |          | ratio    | 0.12           | 0.38 | 0.33 | 0.34 | 0.6  | 0.63 | 0.67 | 0.73 | 0.79 | 0.79 |        |      |        |             |             |           |          |
| Backward feature selection by elimination | 140    | 2075       | 1129     | bin.pep  | 296            | 104  | 135  | 175  | 340  | 42   | 48   | 533  | 402  | 0    | 20     | 7    | 2-Part | 0.84        | 0.56        | 0.7       | 0.71     |
|                                           |        |            |          | detected | 17             | 31   | 62   | 68   | 201  | 26   | 27   | 380  | 317  | 0    |        |      | 3-Part | 0.75        | 0.76        | 0.76      | 0.76     |
|                                           |        |            |          | ratio    | 0.06           | 0.3  | 0.46 | 0.39 | 0.59 | 0.62 | 0.56 | 0.71 | 0.79 | 0    |        |      |        |             |             |           |          |
|                                           | 70     | 2075       | 1129     | bin.pep  | 375            | 118  | 89   | 219  | 108  | 60   | 124  | 594  | 388  | 0    | 20     | 7    | 2-Part | 0.84        | 0.65        | 0.74      | 0.75     |
|                                           |        |            |          | detected | 15             | 30   | 43   | 97   | 53   | 39   | 81   | 441  | 330  | 0    |        |      | 3-Part | 0.8         | 0.8         | 0.8       | 0.8      |
|                                           |        |            |          | ratio    | 0.04           | 0.25 | 0.48 | 0.44 | 0.49 | 0.65 | 0.65 | 0.74 | 0.85 | 0    |        |      |        |             |             |           |          |
|                                           | 35     | 2075       | 1129     | bin.pep  | 350            | 130  | 111  | 81   | 101  | 198  | 328  | 472  | 268  | 36   | 20     | 7    | 2-Part | 0.9         | 0.59        | 0.72      | 0.76     |
|                                           |        |            |          | detected | 14             | 34   | 33   | 31   | 55   | 125  | 231  | 353  | 223  | 30   |        |      | 3-Part | 0.83        | 0.79        | 0.79      | 0.81     |
|                                           |        |            |          | ratio    | 0.04           | 0.26 | 0.3  | 0.38 | 0.54 | 0.63 | 0.7  | 0.75 | 0.83 | 0.83 |        |      |        |             |             |           |          |
|                                           | 18     | 2075       | 1129     | bin.pep  | 402            | 82   | 80   | 68   | 92   | 117  | 604  | 355  | 260  | 15   | 20     | 7    | 2-Part | 0.91        | 0.57        | 0.72      | 0.76     |
|                                           |        |            |          | detected | 18             | 19   | 33   | 27   | 48   | 82   | 406  | 259  | 225  | 12   |        |      | 3-Part | 0.85        | 0.75        | 0.75      | 0.8      |
|                                           |        |            |          | ratio    | 0.04           | 0.23 | 0.41 | 0.4  | 0.52 | 0.7  | 0.67 | 0.73 | 0.87 | 0.8  |        |      |        |             |             |           |          |
|                                           | 9      | 2075       | 1129     | bin.pep  | 329            | 129  | 109  | 110  | 110  | 183  | 288  | 556  | 261  | 0    | 20     | 7    | 2-Part | 0.9         | 0.59        | 0.72      | 0.76     |
|                                           |        |            |          | detected | 19             | 18   | 33   | 46   | 58   | 111  | 194  | 422  | 228  | 0    |        |      | 3-Part | 0.83        | 0.8         | 0.8       | 0.81     |
|                                           |        |            |          | ratio    | 0.06           | 0.14 | 0.3  | 0.42 | 0.53 | 0.61 | 0.67 | 0.76 | 0.87 | 0    |        |      |        |             |             |           |          |
|                                           | 4      | 2075       | 1129     | bin.pep  | 339            | 97   | 92   | 87   | 90   | 140  | 541  | 682  | 7    | 0    | 20     | 7    | 2-Part | 0.91        | 0.55        | 0.71      | 0.75     |
|                                           |        |            |          | detected | 19             | 16   | 24   | 39   | 46   | 75   | 378  | 526  | 6    | 0    |        |      | 3-Part | 0.85        | 0.73        | 0.74      | 0.79     |
|                                           |        |            |          | ratio    | 0.06           | 0.16 | 0.26 | 0.45 | 0.51 | 0.54 | 0.7  | 0.77 | 0.86 | 0    |        |      |        |             |             |           |          |
| Forward feature selection                 | 3      | 2075       | 1129     | bin.pep  | 294            | 140  | 115  | 109  | 161  | 172  | 274  | 639  | 170  | 1    | 20     | 7    | 2-Part | 0.9         | 0.58        | 0.72      | 0.75     |
|                                           |        |            |          | detected | 16             | 16   | 34   | 45   | 81   | 111  | 182  | 495  | 148  | 1    |        |      | 3-Part | 0.84        | 0.79        | 0.8       | 0.81     |
|                                           |        |            |          | ratio    | 0.05           | 0.11 | 0.3  | 0.41 | 0.5  | 0.65 | 0.66 | 0.77 | 0.87 | 1    |        |      |        |             |             |           |          |
|                                           | 5      | 2075       | 1129     | bin.pep  | 300            | 116  | 106  | 96   | 111  | 183  | 523  | 536  | 104  | 0    | 20     | 7    | 2-Part | 0.91        | 0.55        | 0.71      | 0.75     |
|                                           |        |            |          | detected | 16             | 16   | 27   | 37   | 62   | 112  | 363  | 405  | 91   | 0    |        |      | 3-Part | 0.86        | 0.74        | 0.76      | 0.8      |
|                                           |        |            |          | ratio    | 0.05           | 0.14 | 0.25 | 0.39 | 0.56 | 0.61 | 0.69 | 0.76 | 0.88 | 0    |        |      |        |             |             |           |          |
|                                           | 10     | 2075       | 1129     | bin.pep  | 361            | 99   | 108  | 118  | 122  | 146  | 271  | 500  | 344  | 6    | 20     | 7    | 2-Part | 0.91        | 0.61        | 0.74      | 0.77     |
|                                           |        |            |          | detected | 10             | 17   | 37   | 43   | 66   | 97   | 186  | 373  | 297  | 3    |        |      | 3-Part | 0.84        | 0.83        | 0.83      | 0.84     |
|                                           |        |            |          | ratio    | 0.03           | 0.17 | 0.34 | 0.36 | 0.54 | 0.66 | 0.69 | 0.75 | 0.86 | 0.5  |        |      |        |             |             |           |          |
|                                           | 15     | 2075       | 1129     | bin.pep  | 392            | 94   | 81   | 105  | 113  | 164  | 245  | 547  | 328  | 6    | 20     | 7    | 2-Part | 0.91        | 0.6         | 0.73      | 0.77     |
|                                           |        |            |          | detected | 17             | 18   | 22   | 44   | 60   | 110  | 159  | 418  | 277  | 4    |        |      | 3-Part | 0.85        | 0.82        | 0.82      | 0.83     |
|                                           |        |            |          | ratio    | 0.04           | 0.19 | 0.27 | 0.42 | 0.53 | 0.67 | 0.65 | 0.76 | 0.84 | 0.67 |        |      |        |             |             |           |          |
| Model with filter                         | 15     | 2075       | 1129     | bin.pep  | 377            | 115  | 99   | 94   | 134  | 143  | 232  | 483  | 388  | 10   | 20     | 7    | 2-Part | 0.908       | 0.614       | 0.737     | 0.774    |
|                                           |        |            |          | detected | 12             | 19   | 31   | 42   | 68   | 95   | 151  | 375  | 327  | 9    |        |      | 3-Part | 0.845       | 0.832       | 0.829     | 0.839    |
|                                           |        |            |          | ratio    | 0.03           | 0.17 | 0.31 | 0.45 | 0.51 | 0.66 | 0.65 | 0.78 | 0.84 | 0.9  |        |      |        |             |             |           |          |
| Model with filter and 3 hidden nnrals     | 15     | 2075       | 1129     | bin.pep  | 235            | 53   | 57   | 56   | 72   | 102  | 153  | 184  | 182  | 83   | 20     | 7    | 2-Part | 0.885       | 0.597       | 0.714     | 0.750    |
|                                           |        |            |          | detected | 17             | 13   | 20   | 22   | 41   | 67   | 105  | 134  | 139  | 68   |        |      | 3-Part | 0.819       | 0.782       | 0.769     | 0.799    |
|                                           |        |            |          | ratio    | 0.07           | 0.25 | 0.35 | 0.39 | 0.57 | 0.66 | 0.69 | 0.73 | 0.76 | 0.82 |        |      |        |             |             |           |          |
| Model with filter and 5 hidden nnrals     | 15     | 2075       | 1129     | bin.pep  | 308            | 61   | 37   | 58   | 56   | 63   | 70   | 109  | 131  | 257  | 20     | 7    | 2-Part | 0.816       | 0.633       | 0.717     | 0.731    |
|                                           |        |            |          | detected | 47             | 25   | 17   | 26   | 33   | 38   | 49   | 82   | 85   | 199  |        |      | 3-Part | 0.785       | 0.761       | 0.751     | 0.772    |
|                                           |        |            |          | ratio    | 0.15           | 0.41 | 0.46 | 0.45 | 0.59 | 0.60 | 0.70 | 0.75 | 0.85 | 0.77 |        |      |        |             |             |           |          |
| Full model W/O filter                     | 15     | 2842       | 1445     | bin.pep  | 492            | 117  | 128  | 135  | 165  | 239  | 616  | 761  | 189  | 0    | NA     | NA   | 2-Part | 0.913       | 0.535       | 0.67      | 0.727    |
|                                           |        |            |          | detected | 13             | 18   | 35   | 59   | 88   | 136  | 378  | 566  | 152  | 0    |        |      | 3-Part | 0.856       | 0.74        | 0.739     | 0.794    |
|                                           |        |            |          | ratio    | 0.03           | 0.15 | 0.27 | 0.44 | 0.53 | 0.57 | 0.61 | 0.74 | 0.8  | 0    |        |      |        |             |             |           |          |
| Full Model with abundance                 | 15 + 1 | 2842       | 1445     | bin.pep  | 565            | 155  | 137  | 144  | 173  | 227  | 320  | 488  | 626  | 7    | NA     | NA   | 2-Part | 0.905       | 0.618       | 0.71      | 0.764    |
|                                           |        |            |          | detected | 11             | 26   | 39   | 61   | 84   | 119  | 213  | 365  | 522  | 5    |        |      | 3-Part | 0.879       | 0.822       | 0.807     | 0.848    |
|                                           |        |            |          | ratio    | 0.02           | 0.17 | 0.28 | 0.42 | 0.49 | 0.52 | 0.67 | 0.75 | 0.83 | 0.71 |        |      |        |             |             |           |          |

**Supplementary Table 5. Physicochemical features of peptides used in PPA.**

| <b>Feature</b> | <b>Description</b>           | <b>Publication</b>         |
|----------------|------------------------------|----------------------------|
| BHAR880101     | Average flexibility indices  | Bhaskaran-Ponnuswamy, 1988 |
| DAWD720101     | Size                         | Dawson, 1972               |
| DAYM780101     | Amino acid composition       | Dayhoff et al., 1978a      |
| JUKT750101     | Amino acid distribution      | Jukes et al., 1975         |
| KLEP840101     | Net charge                   | Klein et al., 1984         |
| KYTJ820101     | Hydropathy index             | Kyte-Doolittle, 1982       |
| OLSK800101     | Average internal preferences | Olsen, 1980                |
| VENT840101     | Bitterness                   | Venanzi, 1984              |
| ZIMJ680103     | Polarity                     |                            |
| ZIMJ680104     | Isoelectric point            |                            |
| ZIMJ680105     | RF rank                      | Zimmerman et al., 1968     |
| FASG760101     | Molecular weight             | Fasman, 1976               |
| GRAR740102     | Polarity                     | Grantham, 1974             |
| ARGP820101     | Hydrophobicity index         | Argos et al., 1982         |
| HOPA770101     | Hydration number             | Hopfinger, 1971            |

**Supplementary Table 6. Area under the ROC for the seven validation datasets of PPA (Figures 2C, 4, Supplementary Figures 3, 5).** Datasets that haven't been generated in this study are cited. Results from ESP predictor (ESP, Fusaro *et al.*, 2009) were compared to PPA in three conditions. a) PPA-15 was based only on 15 physicochemical features without any protein abundance information, b) PPA-eSC used the 15 features and external protein coverage from other datasets/publications (referred to as external sequence coverage, eSC), c) PPA-iSC used 15 features and each dataset's own sequence coverage (referred to as internal sequence coverage), d) PPA-CID was trained on a CID-based dataset (Orbitrap Velos; Wisniewski, *et al.*, 2012), PPA-iBAQ used the 15 features and a normalized iBAQ value as protein abundance (referred to as intensity based absolute quantification, iBAQ; Schwanhäusser *et al.*, 2011). n.pos: Number of detected peptides per experiment. n. neg: Number of not detected peptides.

| Sample                                          | Platform           | ESP   | PPA-15 | PPA-eSC | PPA-iSC | PPA-CID | PPA-iBAQ | n.pos | n.neg |
|-------------------------------------------------|--------------------|-------|--------|---------|---------|---------|----------|-------|-------|
| Single digests                                  | Q-Exactive         | 0.726 | 0.791  | 0.831   | 0.841   |         |          | 1445  | 1397  |
| Pooled single digests                           | Q-Exactive         | 0.621 | 0.699  | 0.706   | 0.748   |         |          | 3755  | 8917  |
| Human lysate                                    | Q-Exactive         | 0.701 | 0.747  | 0.791   | 0.834   | 0.758   | 0.846    | 4392  | 14924 |
| Human lysate (Wisniewski, <i>et al.</i> , 2012) | LTQ-Orbitrap Velos | 0.765 | 0.787  | 0.815   | 0.835   |         |          | 9240  | 10076 |
| Yeast lysate                                    | Q-Exactive         | 0.78  | 0.783  | 0.815   | 0.861   |         |          | 3529  | 8581  |
| Yeast lysate                                    | TripleToF 5600     | 0.689 | 0.7    | 0.769   | 0.815   |         | 0.819    | 7402  | 4708  |
| Yeast lysate (Hebert <i>et al.</i> , 2013)      | Orbitrap-Fusion    | 0.755 | 0.761  | 0.805   | 0.83    | 0.762   |          | 21617 | 34361 |

**Supplementary Table 7. Statistical analysis of the area under the ROC for the validation datasets (Figures 2C, 4).** We applied a modified z-test to compute a p-value ([http://www.vassarstats.net/roc\\_comp.html](http://www.vassarstats.net/roc_comp.html)): a) PPA-15 was based only on 15 physicochemical features, b) PPA-eSC used the 15 features and external protein coverage from other datasets/publications (referred to as external sequence coverage, eSC), c) PPA-iSC used 15 features and each dataset's own sequence coverage (referred to as internal sequence coverage).

| Sample                                  | Platform           | PPA-15 vs ESP |         | PPA-eSC vs ESP |         | PPA-iSC vs ESP |         | PPA-eSC vs PPA-15 |         | PPA-iSC vs PPA-15 |         | PPA-iSC vs PPA-eSC |         |
|-----------------------------------------|--------------------|---------------|---------|----------------|---------|----------------|---------|-------------------|---------|-------------------|---------|--------------------|---------|
|                                         |                    | z value       | p-value | z value        | p-value | z value        | p-value | z value           | p-value | z value           | p-value | z value            | p-value |
| Single digests                          | Q-Exactive         | 5.2           | <1E-06  | 8.694          | <1E-06  | 9.661          | <1E-06  | 3.498             | <1E-04  | 4.469             | <1E-03  | 0.973              | 0.165   |
| Pooled single digests                   | Q-Exactive         | 10.158        | <1E-06  | 11.083         | <1E-06  | 16.894         | <1E-06  | 0.917             | 0.179   | 6.655             | <1E-06  | 5.484              | <1E-06  |
| Human lysate                            | Q-Exactive         | 6.926         | <1E-06  | 14.101         | <1E-06  | 21.385         | <1E-06  | 7.14              | <1E-06  | 14.364            | <1E-06  | 7.2                | <1E-06  |
| Human lysate (Wiśniewski, et al, 2012 ) | LTQ-Orbitrap Velos | 4.528         | <1E-03  | 10.646         | <1E-06  | 15.307         | <1E-06  | 6.119             | <1E-06  | 10.784            | <1E-06  | 4.67               | <2E-06  |
| Yeast lysate                            | Q-Exactive         | 0.426         | 0.335   | 5.114          | <1E-06  | 12.609         | <1E-06  | 4.687             | <1E-05  | 12.025            | <1E-06  | 7.336              | <1E-06  |
| Yeast lysate                            | TripleToF 5600     | 1.647         | 0.049   | 12.629         | <1E-06  | 20.783         | <1E-06  | 10.98             | <1E-06  | 19.133            | <1E-06  | 8.175              | <1E-06  |
| Yeast lysate (Hebert et al, 2013)       | Orbitrap-Fusion    | 1.943         | 0.026   | 16.802         | <1E-06  | 25.842         | <1E-06  | 14.857            | <2E-04  | 23.895            | <1E-06  | 9.034              | <1E-06  |

**Supplementary Table 8. Neural network classification feature weights in three neural network models.** Model 1: 15 physiochemical features (see **Table S1**). Model 2: PPA based on protein abundance as sequence coverage. Model 3 PPA based on protein abundance as average peak intensity of the three highest intense tryptic peptides (TOP-3, Silva *et al.*, 2006). Model 4 PPA based on protein abundance as iBAQ (Schwanhäusser *et al.*, 2011)

|                                |            | Model 1                              |                    | Model 2                              |                    | Model 3                              |                    | Model 4                              |                    |
|--------------------------------|------------|--------------------------------------|--------------------|--------------------------------------|--------------------|--------------------------------------|--------------------|--------------------------------------|--------------------|
|                                |            | To hidden neuron 1                   | To hidden neuron 2 | To hidden neuron 1                   | To hidden neuron 2 | To hidden neuron 1                   | To hidden neuron 2 | To hidden neuron 1                   | To hidden neuron 2 |
| <b>First layer input nodes</b> | Intercept  | 8.281                                | 1.992              | -9.251                               | -1.485             | -1.492                               | -9.483             | -8.265                               | 2.126              |
|                                | BHAR880101 | 1.844                                | -1.481             | -1.539                               | 0.854              | 0.868                                | -1.522             | -1.211                               | 0.366              |
|                                | DAWD720101 | 0.392                                | 1.478              | 0.384                                | -0.568             | -0.589                               | 0.411              | 0.428                                | -0.116             |
|                                | DAYM780101 | 7.566                                | 0.092              | -6.237                               | -0.409             | -0.481                               | -6.41              | -5.285                               | -0.221             |
|                                | JUKT750101 | -8.684                               | -0.99              | 3.896                                | 1.349              | 1.382                                | 4.038              | 3.626                                | 0.832              |
|                                | KLEP840101 | -1.267                               | -0.409             | -0.298                               | 0.194              | 0.164                                | -0.328             | -0.321                               | 0.126              |
|                                | KYTJ820101 | 2.001                                | 0.303              | -0.609                               | -0.433             | -0.442                               | -0.622             | -0.116                               | -0.244             |
|                                | OLSK800101 | -3.249                               | -1.279             | -0.025                               | 1.342              | 1.356                                | -0.026             | -0.889                               | 0.671              |
|                                | VENT840101 | 0.86                                 | 0.573              | -0.514                               | -0.298             | -0.303                               | -0.527             | -0.403                               | -0.139             |
|                                | ZIMJ680103 | -0.29                                | 0.332              | -0.398                               | -0.272             | -0.313                               | -0.42              | -0.174                               | -0.060             |
|                                | ZIMJ680104 | 0.21                                 | 0.038              | 9.001                                | -0.067             | 0.223                                | 9.305              | 6.533                                | -0.539             |
|                                | ZIMJ680105 | 4.761                                | -1.132             | -3.209                               | 0.125              | 0.111                                | -3.274             | -2.419                               | 0.016              |
|                                | FASG760101 | 7.447                                | -5.158             | -10.612                              | 3.283              | 3.309                                | -10.743            | -8.246                               | 1.443              |
|                                | GRAR740102 | -2.57                                | 8.498              | 1.637                                | -5.992             | -6.31                                | 1.432              | 2.611                                | -2.395             |
|                                | ARGP820101 | 0.44                                 | 0.663              | -0.779                               | -0.145             | -0.164                               | -0.795             | -0.449                               | 0.012              |
|                                | HOPA770101 | -0.35                                | -2.584             | 1.687                                | 1.469              | 1.585                                | 1.75               | 0.779                                | 0.462              |
| Abundance                      | NA         | NA                                   | -0.179             | -0.431                               | -0.452             | -0.185                               | 0.399              | -2.307                               |                    |
| <b>Hidden layer nodes</b>      | Intercept  | -13.854                              |                    | 2.998                                |                    | 2.908                                |                    | 10.883                               |                    |
|                                | Neuron 1   | 9.138                                |                    | -173.345                             |                    | -8.644                               |                    | -197.752                             |                    |
|                                | Neuron 2   | 6.641                                |                    | -9.078                               |                    | -208.71                              |                    | -17.944                              |                    |
|                                |            | <b>Hidden layer neuron to output</b> |                    | <b>Hidden layer neuron to output</b> |                    | <b>Hidden layer neuron to output</b> |                    | <b>Hidden layer neuron to output</b> |                    |
