# Supplementary material
Source: PubMed Central journal article supplement (PMC4350037)
Supplement: supp_M114.044321_mcp.M114.044321-5.pdf [file supp_M114.044321_mcp.M114.044321-5.pdf]

|      |       |       |       |                                                                                                                                                                                              |      |                  |                       |              |              |             |          |             |             |   |    |         |
|------|-------|-------|-------|----------------------------------------------------------------------------------------------------------------------------------------------------------------------------------------------|------|------------------|-----------------------|--------------|--------------|-------------|----------|-------------|-------------|---|----|---------|
| 379  | 2.09  | 2.11  | 1.121 | sp O43747 AP1G1_HUMAN; sp O43747-2 AP1G1_HUMAN                                                                                                                                               | 99.0 | VYALTSLSK        |                       |              | 0.000481178  | 1006.606873 | 504.3017 | 1006.606822 | 504.3104248 | 2 | 9  | 44.0718 |
| 379  | 11.73 | 11.73 | 23.18 | sp O43765 SGTA_HUMAN                                                                                                                                                                         | 99.0 | ACIDAPIA5K       | Carbamidomethyl(C)@3  |              | -0.000807586 | 1136.552856 | 569.2837 | 1136.553589 | 569.2840576 | 2 | 9  | 27.8362 |
| 379  | 11.73 | 11.73 | 23.18 | sp O43765 SGTA_HUMAN                                                                                                                                                                         | 99.0 | AIENPANAIVFYCNR  | Carbamidomethyl(C)@13 |              | -0.0023524   | 1750.834828 | 876.4291 | 1750.846069 | 876.4302979 | 2 | 10 | 41.6759 |
| 379  | 11.73 | 11.73 | 23.18 | sp O43765 SGTA_HUMAN                                                                                                                                                                         | 99.0 | HVEAIVAYYK       |                       |              | 0.000625132  | 1078.545532 | 540.28   | 1078.5448   | 540.2796631 | 2 | 13 | 16.8793 |
| 379  | 11.73 | 11.73 | 23.18 | sp O43765 SGTA_HUMAN                                                                                                                                                                         | 99.0 | LGNAYGAVDCCER    | Carbamidomethyl(C)@11 |              | -0.00194079  | 1451.644531 | 726.8295 | 1451.646362 | 726.8304443 | 2 | 8  | 22.2235 |
| 379  | 11.73 | 11.73 | 23.18 | sp O43765 SGTA_HUMAN                                                                                                                                                                         | 99.0 | LMGLALSLSLK      |                       |              | 0.0014487    | 1032.565308 | 517.2899 | 1032.563721 | 517.2891846 | 2 | 12 | 34.0345 |
| 379  | 11.73 | 11.73 | 23.18 | sp O43765 SGTA_HUMAN                                                                                                                                                                         | 99.9 | VENFEAAVHYGK     |                       |              | -0.00158254  | 1509.726633 | 504.2485 | 1509.72522  | 504.2490234 | 3 | 10 | 36.5785 |
| 2010 | 0.32  | 0.32  | 14.91 | sp O43768 ENSA_HUMAN; sp O43768-7 ENSA_HUMAN; sp O43768-6 ENSA_HUMAN; sp O43768-5 ENSA_HUMAN; sp O43768-4 ENSA_HUMAN; sp O43768-3 ENSA_HUMAN; sp O43768-2 ENSA_HUMAN; sp O43768-1 ENSA_HUMAN | 88.1 | NLVTGDHPPTDLPQKR |                       |              | -0.0026146   | 1899.977783 | 634.3327 | 1899.980225 | 634.3340454 | 3 | 8  | 33.7603 |
| 304  | 13.92 | 13.92 | 14.23 | sp O43776 SYNC_HUMAN                                                                                                                                                                         | 99.0 | FTLWILNR         |                       |              | 0.00157317   | 1061.603638 | 531.8091 | 1061.602173 | 531.8083496 | 2 | 8  | 48.464  |
| 304  | 13.92 | 13.92 | 14.23 | sp O43776 SYNC_HUMAN                                                                                                                                                                         | 99.0 | LEDLVCDVDR       | Carbamidomethyl(C)@6  |              | 0.00242638   | 1331.641724 | 666.8821 | 1331.63916  | 666.8268433 | 2 | 12 | 38.4507 |
| 304  | 13.92 | 13.92 | 14.23 | sp O43776 SYNC_HUMAN                                                                                                                                                                         | 99.0 | MNIYDAVWLK       |                       |              | -0.00033798  | 1338.663816 | 670.3392 | 1338.664185 | 670.3393555 | 2 | 12 | 47.9059 |
| 304  | 13.92 | 13.92 | 14.23 | sp O43776 SYNC_HUMAN                                                                                                                                                                         | 99.0 | NLMFLVLR         |                       |              | -0.000431045 | 1004.583679 | 503.2991 | 1004.584106 | 503.2993164 | 2 | 7  | 52.1029 |
| 304  | 13.92 | 13.92 | 14.23 | sp O43776 SYNC_HUMAN                                                                                                                                                                         | 99.0 | REGIDPTYYWYTDQR  |                       | missed R-E@1 | 0.00249416   | 2058.945801 | 687.3226 | 2058.943604 | 687.3217773 | 3 | 12 | 37.9072 |
| 304  | 13.92 | 13.92 | 14.23 | sp O43776 SYNC_HUMAN                                                                                                                                                                         | 96.1 | IGALEGYR         |                       |              | -0.000325748 | 877.4654541 | 439.74   | 877.4657593 | 439.7401733 | 2 | 8  | 23.3755 |
| 304  | 13.92 | 13.92 | 14.23 | sp O43776 SYNC_HUMAN                                                                                                                                                                         | 96.0 | NDPSLPFK         |                       |              | -0.000791765 | 995.4916992 | 498.7531 | 995.4923706 | 498.753479  | 2 | 7  | 18.7692 |
| 304  | 13.92 | 13.92 | 14.23 | sp O43776 SYNC_HUMAN                                                                                                                                                                         | 91.7 | EGIDPTYYWYTDQR   |                       |              | -0.00117569  | 1902.841309 | 952.4279 | 1902.842407 | 952.4285278 | 2 | 5  | 42.6616 |
| 304  | 13.92 | 13.92 | 14.23 | sp O43776 SYNC_HUMAN                                                                                                                                                                         | 84.6 | FVPVEIK          |                       |              | -0.000764534 | 731.4210815 | 366.7178 | 731.4217529 | 366.7181702 | 2 | 6  | 27.9397 |
| 774  | 5.84  | 5.84  | 19.91 | sp O43809 CPSF5_HUMAN                                                                                                                                                                        | 99.0 | LPQGLNPGDEVEGLK  |                       |              | -0.00181657  | 1751.855835 | 876.9352 | 1751.857788 | 876.9361572 | 2 | 7  | 34.7041 |
| 774  | 5.84  | 5.84  | 19.91 | sp O43809 CPSF5_HUMAN                                                                                                                                                                        | 99.0 | ALFAVPK          |                       |              | 0.000183305  | 744.4536743 | 373.2341 | 744.4534302 | 373.2339783 | 2 | 7  | 32.182  |
| 774  | 5.84  | 5.84  | 19.91 | sp O43809 CPSF5_HUMAN                                                                                                                                                                        | 98.0 | LTETLGR          |                       |              | 0.0015524    | 931.5177002 | 466.7661 | 931.5161133 | 466.7653198 | 2 | 8  | 32.6816 |
| 1987 | 0.35  | 0.35  | 2.036 | sp O43813 LANC1_HUMAN                                                                                                                                                                        | 94.1 | TVEGVLVHHR       |                       |              | -0.00788997  | 1387.74939  | 643.5904 | 1387.757202 | 643.5930176 | 3 |    |         |













[illegible]

|    |       |       |       |                     |      |                         |  |  |              |              |             |          |             |             |   |    |         |
|----|-------|-------|-------|---------------------|------|-------------------------|--|--|--------------|--------------|-------------|----------|-------------|-------------|---|----|---------|
| 32 | 40.45 | 40.45 | 42.97 | sp P02545 MNA_HUMAN | 99.0 | EAAALSTLSEK             |  |  |              | 0.00152865   | 118.583496  | 560.290  | 1118.581909 | 560.2982178 | 2 | 11 | 26.4485 |
| 32 | 40.45 | 40.45 | 42.97 | sp I0SLDAQSLQSL     | 99.0 | I0SLDAQSLQSL            |  |  |              | -0.000441038 | 1429.777222 | 715.8959 | 1428.77771  | 715.8981162 | 1 | 12 | 37.714  |
| 32 | 40.45 | 40.45 | 42.97 | sp P02545 MNA_HUMAN | 99.0 | TETSEEVYSR              |  |  |              | 0.000526737  | 1147.572632 | 574.7936 | 1147.572021 | 574.793335  | 2 | 11 | 15.9871 |
| 32 | 40.45 | 40.45 | 42.97 | sp P02545 MNA_HUMAN | 99.0 | KEGDLIAQAQR             |  |  | missed K-E@1 | -0.00180621  | 1170.63911  | 586.3242 | 1170.635742 | 586.3251343 | 2 | 14 | 15.5834 |
| 32 | 40.45 | 40.45 | 42.97 | sp P02545 MNA_HUMAN | 99.0 | NSNLVGAHEELQSR          |  |  |              | -0.10103871  | 1751.844727 | 876.9296 | 1751.855103 | 876.9348145 | 2 | 9  | 26.7472 |
| 32 | 40.45 | 40.45 | 42.97 | sp P02545 MNA_HUMAN | 99.0 | SGAQASSTPLSPTR          |  |  |              | -0.000243263 | 1358.678833 | 680.3467 | 1358.678955 | 680.3468018 | 2 | 7  | 14.9543 |
| 32 | 40.45 | 40.45 | 42.97 | sp P02545 MNA_HUMAN | 99.0 | SLETENAGLR              |  |  |              | 0.0014533    | 1088.547729 | 545.2811 | 1088.546143 | 545.2803955 | 2 | 10 | 18.639  |
| 32 | 40.45 | 40.45 | 42.97 | sp P02545 MNA_HUMAN | 99.0 | SNEQDSGMGNQIK           |  |  |              | -0.00251322  | 1535.664917 | 768.8397 | 1535.66748  | 768.8410034 | 2 | 9  | 30.5061 |
| 32 | 40.45 | 40.45 | 42.97 | sp P02545 MNA_HUMAN | 99.0 | SVGSGSGGSGFDNLVTR       |  |  |              | 0.000200786  | 1565.734652 | 783.8791 | 1565.734308 | 783.8789673 | 2 | 14 | 29.0627 |
| 32 | 40.45 | 40.45 | 42.97 | sp P02545 MNA_HUMAN | 99.0 | TALNSTGEEVAMR           |  |  |              | -0.000483523 | 1490.739502 | 746.377  | 1490.739868 | 746.3771973 | 2 | 14 | 30.0564 |
| 32 | 40.45 | 40.45 | 42.97 | sp P02545 MNA_HUMAN | 99.0 | VAVEEVEDEGK             |  |  |              | -0.00256018  | 1202.564087 | 602.2893 | 1202.56665  | 602.2905884 | 2 | 12 | 16.9519 |
| 32 | 40.45 | 40.45 | 42.97 | sp P02545 MNA_HUMAN | 98.5 | AGQIVTWAAAGATHSPPTDLVWK |  |  |              | 0.00193824   | 2532.314453 | 845.1121 | 2532.3125   | 845.1114502 | 3 | 7  | 47.2571 |
| 32 | 40.45 | 40.45 | 42.97 | sp P02545 MNA_HUMAN | 98.0 | DLEDSLAR                |  |  |              | -0.00119813  | 917.4442749 | 459.7294 | 917.4454346 | 459.7299805 | 2 | 8  | 24.6557 |
| 32 | 40.45 | 40.45 | 42.97 | sp P02545 MNA_HUMAN | 96.9 | LEAALGEAK               |  |  |              | -3.71E-05    | 900.4916992 | 451.2531 | 900.4916382 | 451.2531128 | 2 | 8  | 17.7707 |
| 32 | 40.45 | 40.45 | 42.97 | sp P02545 MNA_HUMAN | 96.7 | QNGDDPLLYTR             |  |  |              | -0.00177139  | 1290.618652 | 646.3166 | 1290.620483 | 646.3175049 | 2 | 9  | 31.2698 |
| 32 | 40.45 | 40.45 | 42.97 | sp P02545 MNA_HUMAN | 95.9 | LQLESLK                 |  |  |              | -0.00151318  | 829.489502  | 415.752  | 829.4890058 | 415.7527466 | 2 | 8  | 27.7999 |
| 32 | 40.45 | 40.45 | 42.97 | sp P02545 MNA_HUMAN | 95.2 | NIYSSELR                |  |  |              | 0.00103996   | 1022.504517 | 512.2595 | 1022.503296 | 512.2589111 | 2 | 8  | 24.9603 |
| 32 | 40.45 | 40.45 | 42.97 | sp P02545 MNA_HUMAN | 91.6 | SGAQASSTPLSPTR          |  |  |              | 0.000824271  | 1358.679932 | 680.3472 | 1358.678955 | 680.3468018 | 2 | 6  | 15.4598 |
| 32 | 40.45 | 40.45 | 42.97 | sp P02545 MNA_HUMAN | 87.5 | VAVEEVEDEGK             |  |  |              | -0.00152821  | 1202.565308 | 602.2899 | 1202.56665  | 602.2905884 | 2 | 5  | 17.4655 |
| 32 | 40.45 | 40.45 | 42.97 | sp P02545 MNA_HUMAN | 87.1 | EDLQDLNR                |  |  |              | -0.000594346 | 1130.519897 | 566.2672 | 1130.520386 | 566.2674651 | 2 | 8  | 20.9273 |
| 32 | 40.45 | 40.45 | 42.97 | sp P02545 MNA_HUMAN | 84.2 | LAVYIDR                 |  |  |              | -0.000560776 | 848.4750977 | 425.2448 | 848.4755859 | 425.2450867 | 2 | 6  | 26.3314 |
| 32 | 40.45 | 40.45 | 42.97 | sp P02545 MNA_HUMAN | 79.8 | LSPSPTSQR               |  |  |              | 0.00172938   |             |          |             |             |   |    |         |





[illegible]













[illegible]

[illegible]









[illegible]

|     |       |       |       |                      |             |                           |          |                      |              |             |             |          |             |              |   |    |         |
|-----|-------|-------|-------|----------------------|-------------|---------------------------|----------|----------------------|--------------|-------------|-------------|----------|-------------|--------------|---|----|---------|
| 197 | 19.24 | 19.24 | 28.75 | sp P1268J MDH2_HUMAN | 99.0        | REDLVVAPAGITLK            |          |                      | missed R-E@1 | -0.002459   | 1480.858887 | 741.4367 | 1480.861328 | 741.43739272 | 2 | 7  | 35.7305 |
| 197 | 19.24 | 19.24 | 28.75 | sp P1268J MDH2_HUMAN | 98.9        | EEEDHCFLEIMTK             |          | Carbamidomethyl(C)@6 |              | -0.00056827 | 1808.759155 | 603.927  | 1808.759644 | 603.9271851  | 3 | 8  | 44.3007 |
| 197 | 19.24 | 19.24 | 28.75 | sp P1268J MDH2_HUMAN | 95.9        | VAOGVGFQVQK               |          |                      |              | 0.00030681  | 1157.604248 | 579.8094 | 1157.604004 | 579.8093262  | 2 | 6  | 10.4276 |
| 197 | 19.24 | 19.24 | 28.75 | sp P1268J MDH2_HUMAN | 95.6        | LGVIIISR                  |          |                      |              | -0.00112335 | 843.5166626 | 422.7656 | 843.5178223 | 422.7661743  | 2 | 8  | 25.7348 |
| 197 | 19.24 | 19.24 | 28.75 | sp P1268J MDH2_HUMAN | 88.7        | VRDVFQAK                  |          |                      | missed R-D@2 | 5.92E-05    | 962.5186768 | 482.2666 | 962.5185547 | 482.2665405  | 2 | 7  | 16.3262 |
| 197 | 19.24 | 19.24 | 28.75 | sp P1268J MDH2_HUMAN | 29.01200236 | 1429.677368               | 477.5664 | 1429.677246          | 477.5663452  | 0.000212036 | 1429.677368 | 477.5664 | 1429.677246 | 477.5663452  | 3 | 8  | 30.0012 |
| 22  | 43.98 | 43.98 | 13.34 | sp P12270 TPR_HUMAN  | 99.0        | AIQDHLEVEQSK              |          | Carbamidomethyl(C)@4 |              | -0.00437016 | 1508.779297 | 755.3960 | 1508.783447 | 755.3989868  | 2 | 8  | 29.224  |
| 22  | 43.98 | 43.98 | 13.34 | sp P12270 TPR_HUMAN  | 99.0        | EGVGGLNVLSEEGK            |          |                      |              | 2.16E-05    | 1641.821045 | 821.9178 | 1641.820923 | 821.9177856  | 2 | 9  | 33.8332 |
| 22  | 43.98 | 43.98 | 13.34 | sp P12270 TPR_HUMAN  | 99.0        | ELOEQLDSNAR               |          |                      |              | 0.00423122  | 1543.752075 | 772.8833 | 1543.747803 | 772.8811466  | 2 | 12 | 32.3946 |
| 22  | 43.98 | 43.98 | 13.34 | sp P12270 TPR_HUMAN  | 99.0        | FLADQSGEIDGL              |          |                      |              | 0.000428185 | 1462.730835 | 732.3727 | 1462.730347 | 732.3724365  | 2 | 9  | 32.75   |
| 22  | 43.98 | 43.98 | 13.34 | sp P12270 TPR_HUMAN  | 99.0        | GLQLTFGIGGMQHQHFFDDER     |          |                      |              | -0.00122446 | 2360.084229 | 787.702  | 2360.085449 | 787.7024536  | 3 | 8  | 44.7918 |
| 22  | 43.98 | 43.98 | 13.34 | sp P12270 TPR_HUMAN  | 99.0        | IISTDLFAFK                |          |                      |              | -0.00182404 | 1108.574707 | 555.2946 | 1108.576416 | 555.2954712  | 2 | 9  | 29.305  |
| 22  | 43.98 | 43.98 | 13.34 | sp P12270 TPR_HUMAN  | 99.0        | LDELQASDVSK               |          |                      |              | 0.000918252 | 1302.667725 | 652.3411 | 1302.666748 | 652.3406372  | 2 | 9  | 27.1208 |
| 22  | 43.98 | 43.98 | 13.34 | sp P12270 TPR_HUMAN  | 99.0        | LDELILDLQEAANELESEK       |          |                      |              | 0.00167406  | 2024.069458 | 1013.042 | 2024.067749 | 1013.041138  | 2 | 8  | 54.504  |
| 22  | 43.98 | 43.98 | 13.34 | sp P12270 TPR_HUMAN  | 99.0        | LSQELEYTEDVK              |          |                      |              | 0.00537249  | 1565.787842 | 783.9012 | 1565.782471 | 783.8984985  | 2 | 10 | 41.9645 |
| 22  | 43.98 | 43.98 | 13.34 | sp P12270 TPR_HUMAN  | 99.0        | QHLNSMVEQVQSSORR          |          |                      |              | -0.00153879 | 1927.915649 | 643.6458 | 1927.916992 | 643.6463013  | 3 | 9  | 22.678  |
| 22  | 43.98 | 43.98 | 13.34 | sp P12270 TPR_HUMAN  | 99.0        | RPSTSQTVSTPAPVPIESTEAIEAK |          |                      |              | 0.00576604  | 2694.41333  | 899.1451 | 2694.407471 | 899.1431274  | 3 | 9  | 37.808  |
| 22  | 43.98 | 43.98 | 13.34 | sp P12270 TPR_HUMAN  | 99.0        | TETMNVMTNK                |          |                      |              | -0.00184076 | 1395.63562  | 698.8251 | 1395.637451 | 698.8259888  | 2 | 8  | 25.9338 |
| 22  | 43.98 | 43.98 | 13.34 | sp P12270 TPR_HUMAN  | 99.0        | TLSVONEQVEALOR            |          | Deamidated(Q)@6      |              | 0.0113047   | 1701.864624 | 851.9396 | 1701.853394 | 851.933396   | 2 | 11 | 42.8692 |
| 22  | 43.98 | 43.98 | 13.34 | sp P12270 TPR_HUMAN  | 99.0        | VESEQDQVEIK               |          |                      |              | -0.00189833 | 1527.70752  | 764.861  | 1527.709351 | 764.8619385  | 2 | 10 | 32.1592 |
| 22  | 43.98 | 43.98 | 13.34 | sp P12270 TPR_HUMAN  | 99.0        | VLLMELEEAR                |          |                      |              | 0.000261766 | 1201.637817 | 601.8262 | 1201.637695 | 601.8261108  |   |    |         |































|      |       |       |       |                       |      |                   |                        |              |             |          |             |             |   |    |         |
|------|-------|-------|-------|-----------------------|------|-------------------|------------------------|--------------|-------------|----------|-------------|-------------|---|----|---------|
| 359  | 12.34 | 12.34 | 33.47 | sp P28066 PSA4_HUMAN  | 99.0 | TSPLMSPSIEK       |                        | 0.000258274  | 1430.73291  | 716.377  | 1430.732666 | 716.3735962 | 2 | 12 | 33.5992 |
| 359  | 12.34 | 12.34 | 33.47 | sp P28066 PSA4_HUMAN  | 99.0 | LQVEYAEAEK        |                        | -0.000195189 | 1422.775635 | 712.351  | 1422.775879 | 712.3552006 | 2 | 9  | 50.0458 |
| 359  | 12.34 | 12.34 | 33.47 | sp P28066 PSA4_HUMAN  | 99.0 | SSLILK            |                        | -0.000653196 | 772.505249  | 387.2599 | 772.505894  | 387.2601929 | 2 | 9  | 32.2129 |
| 1271 | 2.32  | 2.32  | 9.583 | sp P28070 PSB4_HUMAN  | 99.0 | TQNPMTVGTSLGVK    |                        | -0.00283127  | 1530.804932 | 766.4097 | 1530.807617 | 766.4107718 | 2 | 13 | 35.9076 |
| 1271 | 2.32  | 2.32  | 9.583 | sp P28070 PSB4_HUMAN  | 80.1 | AHSWLTR           |                        | -1.92E-05    | 982.5348511 | 492.2747 | 982.5348511 | 492.2746887 | 2 | 6  | 25.4352 |
| 880  | 4.82  | 4.82  | 13.04 | sp P28072 PSB6_HUMAN  | 99.0 | LAIAESGVER        |                        | -0.00090761  | 1114.59729  | 558.3059 | 1114.598267 | 558.3063965 | 2 | 10 | 22.3426 |
| 880  | 4.82  | 4.82  | 13.04 | sp P28072 PSB6_HUMAN  | 99.0 | TTGTGSYANR        |                        | 0.00103687   | 1082.536621 | 542.2756 | 1082.536645 | 542.2750854 | 2 | 8  | 13.9072 |
| 880  | 4.82  | 4.82  | 13.04 | sp P28072 PSB6_HUMAN  | 98.4 | QVLLGDQIPK        |                        | 3.30E-05     | 1109.644531 | 555.8295 | 1109.644409 | 555.8295288 | 2 | 9  | 31.1739 |
| 562  | 8.03  | 8.03  | 20.23 | sp P28074 PSB5_HUMAN  | 99.0 | ATAGAYIASGTVK     |                        | -0.000532374 | 1279.676836 | 640.8456 | 1279.677246 | 640.8458862 | 2 | 11 | 23.7841 |
| 562  | 8.03  | 8.03  | 20.23 | sp P28074 PSB5_HUMAN  | 99.0 | GMGLSMGTMCIGDWK   | Carbamidomethyl(C) @11 | 0.000843551  | 1642.698486 | 822.3565 | 1642.697632 | 822.3560791 | 2 | 10 | 48.8679 |
| 562  | 8.03  | 8.03  | 20.23 | sp P28074 PSB5_HUMAN  | 99.0 | HGVIVAAISR        |                        | -0.000798242 | 1023.545532 | 512.78   | 1023.546143 | 512.7803345 | 2 | 11 | 9.6622  |
| 562  | 8.03  | 8.03  | 20.23 | sp P28074 PSB5_HUMAN  | 99.0 | RGPGLYYVDSGNR     | missed R-G @1          | 0.00210267   | 1581.755859 | 528.2592 | 1581.75354  | 528.2584389 | 3 | 11 | 25.1966 |
| 1242 | 2.47  | 2.47  | 3.933 | sp P28331 NDUS1_HUMAN | 99.0 | QLTYSYWEALSR      |                        | -0.00130843  | 1610.792725 | 806.4036 | 1610.794067 | 806.4042969 | 2 | 10 | 50.6586 |
| 1242 | 2.47  | 2.47  | 3.933 | sp P28331 NDUS1_HUMAN | 85.2 | VFLFLAGAGCICTR    | Carbamidomethyl(C) @11 | -0.046846061 | 1490.744629 | 746.3796 | 1490.791504 | 746.4030151 | 2 | 7  | 47.1878 |
| 1368 | 2.02  | 2.26  | 1.548 | sp P28340 DPOD1_HUMAN | 99.0 | IDISQSLVTK        |                        | -0.00207802  | 1128.67749  | 565.346  | 1128.675415 | 565.3449707 | 2 | 8  | 42.2162 |
| 1368 | 2.02  | 2.26  | 1.548 | sp P28340 DPOD1_HUMAN | 80.3 | LAVYLCK           | Carbamidomethyl(C) @5  | -0.036534902 | 865.4366455 | 433.7256 | 865.4731445 | 433.743866  | 2 | 6  | 28.5328 |
| 405  | 10.92 | 10.92 | 23.96 | sp P28482 MK01_HUMAN  | 99.0 | FRHENIGDIIIR      | missed R-H @2          | 0.0037143    | 1708.94104  | 570.6543 | 1708.937256 | 570.6530151 | 3 | 10 | 37.9545 |
| 405  | 10.92 | 10.92 | 23.96 | sp P28482 MK01_HUMAN  | 99.0 | VADPDHDTGFLTEYVTR |                        | -0.00236218  | 2142.994873 | 715.3389 | 2142.997077 | 715.3395996 | 3 | 9  | 33.9658 |
| 405  | 10.92 | 10.92 | 23.96 | sp P28482 MK01_HUMAN  | 98.3 | GQVFDVGPR         |                        | -8.43E-05    | 973.4980469 | 487.7563 | 973.4981079 | 487.7563477 | 2 | 9  | 26.1826 |
| 405  | 10.92 | 10.92 | 23.96 | sp P28482 MK01_HUMAN  | 98.0 | NYLLSLPHK         |                        | 0.0014035    | 1083.609131 | 542.8118 | 1083.607666 | 542.8110962 | 2 | 9  | 32.0867 |
| 405  | 10.92 | 10.92 | 23.96 | sp P28482 MK01_HUMAN  | 97.4 | FDMELDLPLK        |                        | 0.00262075   | 1221.561523 | 611.788  | 1221.558716 | 611.7866211 | 2 | 10 | 41.6731 |
| 405  | 10.92 | 10.92 | 23.96 | sp P28482 MK01_HUMAN  | 92.9 | GQVFDVGPR         |                        | 0.04636398   | 973.5444946 | 487.7795 | 973.4981079 | 487.7563477 | 2 | 8  | 26.1501 |
| 4    |       |       |       |                       |      |                   |                        |              |             |          |             |             |   |    |         |



[illegible]





















































[illegible]





















|      |        |        |       |                                                |                      |              |             |          |              |             |   |    |         |
|------|--------|--------|-------|------------------------------------------------|----------------------|--------------|-------------|----------|--------------|-------------|---|----|---------|
| 1    | 136.04 | 136.04 | 19.81 | sp P78527 PRKDC_HUMAN                          | 98.0 NNWVEISLSR      | -0.00309095  | 1174.570068 | 589.2923 | 1174.57312   | 558.203832  | 2 | 10 | 32.0853 |
| 1    | 136.04 | 136.04 | 19.81 | sp P78527 PRKDC_HUMAN                          | 97.5 VTVMASLR        | 0.000458507  | 875.4902954 | 438.7524 | 875.488862   | 438.7522278 | 2 | 8  | 26.5013 |
| 1    | 136.04 | 136.04 | 19.81 | sp P78527 PRKDC_HUMAN                          | 97.5 LSFVAFPR        | 5.67E-05     | 935.5228882 | 468.7687 | 935.5228882  | 468.7687073 | 2 | 8  | 43.3507 |
| 1    | 136.04 | 136.04 | 19.81 | sp P78527 PRKDC_HUMAN                          | 97.2 QNLSSSQVLPK     | 0.00155891   | 1169.641846 | 585.8282 | 1169.640381  | 585.8275146 | 2 | 9  | 23.595  |
| 1    | 136.04 | 136.04 | 19.81 | sp P78527 PRKDC_HUMAN                          | 96.4 TFPVLLR         | 0.00222485   | 844.5192871 | 423.2669 | 844.5170896  | 423.2658081 | 2 | 6  | 38.7895 |
| 1    | 136.04 | 136.04 | 19.81 | sp P78527 PRKDC_HUMAN                          | 95.5 SNSIEFR         | 0.000507909  | 964.498291  | 483.2564 | 964.4978027  | 483.2561646 | 2 | 7  | 29.7009 |
| 1    | 136.04 | 136.04 | 19.81 | sp P78527 PRKDC_HUMAN                          | 95.4 GIFTSEIGTK      | 0.00071353   | 1051.555664 | 526.7851 | 1051.5554932 | 526.78479   | 2 | 9  | 31.4036 |
| 1    | 136.04 | 136.04 | 19.81 | sp P78527 PRKDC_HUMAN                          | 96.0 MLVCCR          | 0.000363986  | 965.4248657 | 483.7197 | 965.4244995  | 483.7195435 | 2 | 7  | 20.4102 |
| 1    | 136.04 | 136.04 | 19.81 | sp P78527 PRKDC_HUMAN                          | 93.3 HVMQPYWK        | 0.00144599   | 1064.509888 | 533.2622 | 1064.511353  | 533.2629395 | 2 | 6  | 15.3577 |
| 1    | 136.04 | 136.04 | 19.81 | sp P78527 PRKDC_HUMAN                          | 93.0 LATTLLQHWK      | -0.000975253 | 1209.686157 | 404.236  | 1209.687012  | 404.2362671 | 3 | 7  | 33.9524 |
| 1    | 136.04 | 136.04 | 19.81 | sp P78527 PRKDC_HUMAN                          | 92.9 ADEPESGLSEETQVK | -0.00523884  | 1630.763428 | 816.389  | 1630.768555  | 816.3916016 | 2 | 6  | 22.2221 |
| 1    | 136.04 | 136.04 | 19.81 | sp P78527 PRKDC_HUMAN                          | 96.3 FNNYVDCMK       | 0.00232349   | 1189.491821 | 595.7532 | 1189.498624  | 595.7520752 | 2 | 8  | 25.8332 |
| 1    | 136.04 | 136.04 | 19.81 | sp P78527 PRKDC_HUMAN                          | 86.6 VPADLLK         | -0.000544808 | 754.4584961 | 378.2365 | 754.4588623  | 378.2367249 | 2 | 7  | 24.3784 |
| 1    | 136.04 | 136.04 | 19.81 | sp P78527 PRKDC_HUMAN                          | 94.9 VLEQLVHFFMQSR   | 0.00212853   | 1766.952393 | 589.9914 | 1766.950195  | 589.9906616 | 3 | 7  | 45.4975 |
| 1    | 136.04 | 136.04 | 19.81 | sp P78527 PRKDC_HUMAN                          | 82.6 YFEGVSPK        | 0.000433221  | 925.4550781 | 463.7348 | 925.4545288  | 463.7345581 | 2 | 7  | 21.5698 |
| 1    | 136.04 | 136.04 | 19.81 | sp P78527 PRKDC_HUMAN                          | 79.0 LLQDFNR         | 0.000915754  | 904.4776611 | 453.2461 | 904.4766846  | 453.2456055 | 2 | 7  | 24.0772 |
| 1    | 136.04 | 136.04 | 19.81 | sp P78527 PRKDC_HUMAN                          | 76.2 FYGELALK        | 0.000561293  | 939.5070801 | 470.7608 | 939.5065918  | 470.7605591 | 2 | 7  | 33.9497 |
| 1    | 136.04 | 136.04 | 19.81 | sp P78527 PRKDC_HUMAN                          | 75.0 LESFLK          | -0.000321294 | 735.4165039 | 368.7155 | 735.416687   | 368.7156372 | 2 | 6  | 25.7388 |
| 2042 | 0.27   | 0.27   | 2.651 | sp P80303 NUCB2_HUMAN; sp P80303-2 NUCB2_HUMAN | 85.2 F2STDLMLIK      | 0.0008494    | 1310.643677 | 656.3291 | 1310.642822  | 656.3286743 | 2 | 5  | 44.7006 |
| 1416 | 2      | 2      | 11.11 | sp P82909 RT36_HUMAN                           | 19.0 LVSGEEMEFIR     | 0.0030202    | 1507.737305 | 754.8759 | 1507.734131  | 754.8743286 | 2 | 10 | 36.1563 |
| 1710 | 1.02   | 1.03   | 3.883 | sp P82930 RT34_HUMAN                           | 82.8 LPLFLGLR        | 0.000851058  | 871.5286865 | 436.7716 | 871.5279541  | 436.7712708 | 2 | 6  | 42.9936 |
| 2137 | 0.2    | 0.2    | 4.124 | sp P82933 RT09_HUMAN                           | 78.0 LTLSCCGAAEEFVQR | -0.0111586   | 1836.856445 | 919.4355 | 1836.867554  | 919.4411011 | 2 | 5  | 32.7919 |
| 1604 | 1.42   | 1.42   | 3.636 | sp P82970 HMGNS_HUMAN                          | 99.0 EENIEDATEK      | -0.000411666 | 1176.514282 | 589.2644 | 1176.514648  | 589.2645874 | 2 | 6  | 13.1583 |
| 849  | 5.13   | 5.14   | 21.61 | sp P82979 SARNP_HUMAN                          |                      |              |             |          |              |             |   |    |         |













[illegible]

[illegible]























|      |       |       |        |                                                                                                                           |      |                      |              |             |          |              |             |   |    |         |
|------|-------|-------|--------|---------------------------------------------------------------------------------------------------------------------------|------|----------------------|--------------|-------------|----------|--------------|-------------|---|----|---------|
| 442  | 10.25 | 10.25 | 16.9   | sp Q2TAV7 TSMU1_HUMAN                                                                                                     | 99.0 | AJAAQALAGEVSPVPSR    | 0.00189247   | 1734.964722 | 868.4896 | 1734.962891  | 868.4887085 | 2 | 11 | 41.6773 |
| 442  | 10.25 | 10.25 | 16.9   | sp Q2TAV7 TSMU1_HUMAN                                                                                                     | 99.0 | DVEEEKPFTQLSR        | 0.00220153   | 1576.775513 | 788.395  | 1576.773315  | 789.3932009 | 2 | 9  | 27.9669 |
| 442  | 10.25 | 10.25 | 16.9   | sp Q2TAV7 TSMU1_HUMAN                                                                                                     | 99.0 | DVIGIAHPHQNATYSDGLLK | -0.00329035  | 2640.363037 | 661.098  | 2640.365967  | 661.0987549 | 4 | 11 | 38.9136 |
| 442  | 10.25 | 10.25 | 16.9   | sp Q2TAV7 TSMU1_HUMAN                                                                                                     | 99.0 | YHLENLRLR            | 0.000507041  | 1240.693237 | 414.5717 | 1240.692749  | 414.5715332 | 3 | 8  | 39.9551 |
| 442  | 10.25 | 10.25 | 16.9   | sp Q2TAV7 TSMU1_HUMAN                                                                                                     | 97.5 | SNTVYVMNMGGQIVR      | -0.0056456   | 1688.864624 | 845.4396 | 1688.870239  | 845.4423828 | 2 | 7  | 38.5682 |
| 442  | 10.25 | 10.25 | 16.9   | sp Q2TAV7 TSMU1_HUMAN                                                                                                     | 96.3 | LIMQYLYK             | 0.00333467   | 907.5214844 | 454.768  | 907.5200806  | 454.767334  | 2 | 7  | 35.3652 |
| 2256 | 0.13  | 0.16  | 0.765  | sp Q2TB90J KDC1_HUMAN                                                                                                     | 71.8 | IKQETVK              | -0.00151318  | 1289.489502 | 415.752  | 1289.4909058 | 415.7527466 | 2 | 7  | 27.7999 |
| 773  | 5.84  | 5.84  | 5.611  | sp Q3ZM24 JLRRF1_HUMAN; sp Q3ZM24-2 JLRRF1_HUMAN                                                                          | 99.0 | AMVSNALQDNEK         | -0.00315366  | 1318.615723 | 660.3151 | 1318.618774  | 660.3166504 | 2 | 8  | 18.1067 |
| 773  | 5.84  | 5.84  | 5.611  | sp Q3ZM24 JLRRF1_HUMAN; sp Q3ZM24-2 JLRRF1_HUMAN                                                                          | 99.0 | TNFMVYVDTLK          | -0.0013061   | 1358.65271  | 680.3336 | 1358.654053  | 680.3342896 | 2 | 9  | 38.4751 |
| 773  | 5.84  | 5.84  | 5.611  | sp Q3ZM24 JLRRF1_HUMAN; sp Q3ZM24-2 JLRRF1_HUMAN                                                                          | 96.7 | IEVFNANVG            | -0.00790649  | 942.504932  | 472.26   | 942.5134277  | 472.2640076 | 2 | 8  | 16.9896 |
| 773  | 5.84  | 5.84  | 5.611  | sp Q3ZM24 JLRRF1_HUMAN; sp Q3ZM24-2 JLRRF1_HUMAN                                                                          | 82.8 | IGDQTQSSPAEPK        | 0.00031125   | 1299.631104 | 650.8228 | 1299.630615  | 650.8226318 | 2 | 4  | 9.5699  |
| 1976 | 0.36  | 0.36  | 0.8946 | sp Q38SD2 LRRK1_HUMAN                                                                                                     | 77.7 | LOELDISDNK           | 0.00306191   | 1173.59082  | 587.8027 | 1173.587769  | 587.8011475 | 2 | 7  | 31.6351 |
| 1976 | 0.36  | 0.36  | 0.8946 | sp Q38SD2 LRRK1_HUMAN                                                                                                     | 77.1 | GRVIAVLK             | -0.00950683  | 854.5606689 | 428.2878 | 854.5701904  | 428.2923584 | 2 | 6  | 36.5164 |
| 1499 | 1.9   | 1.9   | 14.29  | sp Q3MH2D2 LSM12_HUMAN; sp Q3MH2D2-2 LSM12_HUMAN                                                                          | 99.0 | LQGEVAFDYQSK         | -3.59E-06    | 1482.735474 | 742.375  | 1482.735474  | 742.375     | 2 | 11 | 33.3617 |
| 1499 | 1.9   | 1.9   | 14.29  | sp Q3MH2D2 LSM12_HUMAN; sp Q3MH2D2-2 LSM12_HUMAN                                                                          | 83.1 | TETPPPLASNVSK        | 0.0030621    | 1452.785522 | 727.4    | 1452.782349  | 727.3984985 | 2 | 6  | 34.2674 |
| 1332 | 2.09  | 2.09  | 2.364  | sp Q3YEC7 PARF_HUMAN; sp Q3YEC7-2 PARF_HUMAN                                                                              | 99.0 | TAADELEAFGLGGAPGGR   | -0.0121856   | 1687.804443 | 844.9095 | 1687.816528  | 844.9155884 | 2 | 8  | 51.0071 |
| 653  | 7.03  | 7.03  | 14.51  | sp Q3ZC08-2 TIM50_HUMAN                                                                                                   | 99.0 | IPDFDNDPLVLQGLR      | -0.00120351  | 1910.972656 | 956.4936 | 1910.973755  | 956.4942017 | 2 | 9  | 46.239  |
| 653  | 7.03  | 7.03  | 14.51  | sp Q3ZC08-2 TIM50_HUMAN                                                                                                   | 99.0 | QNLFLGSLTSR          | -0.000515302 | 1234.666504 | 618.3405 | 1234.666992  | 618.3407593 | 2 | 11 | 41.0544 |
| 653  | 7.03  | 7.03  | 14.51  | sp Q3ZC08-2 TIM50_HUMAN                                                                                                   | 99.0 | TVLHYLEADPLPAAFK     | -0.0101853   | 1930.95752  | 644.6598 | 1930.967651  | 644.663147  | 3 | 14 | 47.5048 |
| 653  | 7.03  | 7.03  | 14.51  | sp Q3ZC08-2 TIM50_HUMAN                                                                                                   | 97.5 | RAPOQAEISGR          | 0.03164599   | 1270.658203 | 424.56   | 1270.626587  | 424.549469  | 2 | 7  | 9.9103  |
| 206  | 0.3   | 0.3   | 14.51  | sp Q3ZC08-2 TIM50_HUMAN                                                                                                   | 95.0 | VLLDSLAFK            | -0.025626199 | 1171.649048 | 595.8318 | 1117.674863  | 599.8448045 | 2 | 6  | 57.3807 |
| 1499 | 1.9   | 1.9   | 3.097  | sp Q49A26 GLYR1_HUMAN; sp Q49A26-5 GLYR1_HUMAN; sp Q49A26-4 GLYR1_HUMAN; sp Q49A26-3 GLYR1_HUMAN; sp Q49A26-2 GLYR1_HUMAN | 85.9 | DVLVGLPSGVGLQIRGPBK  | -0.00377062  | 1704.984863 | 853.49   |              |             |   |    |         |













[illegible]



















[illegible]









|      |      |      |        |                         |                        |              |                   |              |             |             |             |             |    |         |         |
|------|------|------|--------|-------------------------|------------------------|--------------|-------------------|--------------|-------------|-------------|-------------|-------------|----|---------|---------|
| 1503 | 1.58 | 1.89 | 0.9103 | sp Q9NYL2 JUGG1_HUMAN   | sp Q9NYL2 JUGG1_HUMAN  | 99.0         | WWGLQSLFSDMAK     | 0.00627024   | 1661.85887  | 831.9367    | 1661.852539 | 831.935337  | 2  | 6       | 47.7011 |
| 1503 | 1.89 | 1.89 | 1.879  | sp Q9NY8Y FAKD2_HUMAN   | sp Q9NY8-2 FAKD2_HUMAN | 99.0         | DI0ISELLS2DMK     | 0.00115523   | 1478.718628 | 740.3666    | 1478.717407 | 740.365968  | 6  | 6       | 56.317  |
| 1354 | 2.04 | 2.05 | 12.5   | sp Q9NZ45 CISD1_HUMAN   |                        | 99.0         | NHAFDMEDGGK       | -0.00125199  | 1488.690674 | 497.2375    | 1488.691895 | 497.237915  | 3  | 11      | 34.1972 |
| 1185 | 2.84 | 2.84 | 8.897  | sp Q9NZ63 C1078_HUMAN   |                        | 99.0         | NAECDLLEYLPENIR   | -0.00137532  | 1734.787109 | 868.4008    | 1734.78833  | 868.4014282 | 2  | 11      | 41.034  |
| 1185 | 2.84 | 2.84 | 8.897  | sp Q9NZ63 C1078_HUMAN   |                        | 94.7         | FYHLEENAPIR       | -0.00221479  | 1387.686401 | 463.5694    | 1387.688477 | 463.5700989 | 3  | 8       | 27.5156 |
| 104  | 26.4 | 26.4 | 30.26  | sp Q9NZ18 F2B1_HUMAN    |                        | -0.00014206  | 1499.710327       | 750.8624     | 1499.710327 | 750.8624878 |             | 2           | 7  | 20.6629 |         |
| 104  | 26.4 | 26.4 | 30.26  | sp Q9NZ18 F2B1_HUMAN    |                        | 99.0         | ISYSGQFLVK        | -0.00152824  | 1140.616455 | 571.3155    | 1140.61792  | 571.3162231 | 2  | 11      | 34.3867 |
| 104  | 26.4 | 26.4 | 30.26  | sp Q9NZ18 F2B1_HUMAN    |                        | 0.0013124    | 1861.979858       | 931.9972     | 1861.978516 | 931.996521  |             | 2           | 14 | 50.0431 |         |
| 104  | 26.4 | 26.4 | 30.26  | sp Q9NZ18 F2B1_HUMAN    |                        | 99.0         | LVPTQVYQGAIGK     | 0.000519647  | 1470.881714 | 736.4481    | 1470.880981 | 736.4477539 | 2  | 13      | 51.154  |
| 104  | 26.4 | 26.4 | 30.26  | sp Q9NZ18 F2B1_HUMAN    |                        | -0.000913299 | 1874.96167        | 938.4881     | 1874.962524 | 938.4885254 |             | 2           | 10 | 42.4384 |         |
| 104  | 26.4 | 26.4 | 30.26  | sp Q9NZ18 F2B1_HUMAN    |                        | 99.0         | MVITGPPEAQFK      | -0.00192427  | 1429.762085 | 715.8883    | 1429.763916 | 715.8892212 | 2  | 8       | 38.7916 |
| 104  | 26.4 | 26.4 | 30.26  | sp Q9NZ18 F2B1_HUMAN    |                        | 99.0         | QGSPVAAGAPAK      | -0.0011554   | 1052.561003 | 527.2874    | 1052.561401 | 527.2880249 | 2  | 8       | 9.0137  |
| 104  | 26.4 | 26.4 | 30.26  | sp Q9NZ18 F2B1_HUMAN    |                        | 99.0         | RLEIEHSPVK        | 0.000767527  | 1206.672974 | 403.2316    | 1206.672119 | 403.2312927 | 3  | 11      | 16.9626 |
| 104  | 26.4 | 26.4 | 30.26  | sp Q9NZ18 F2B1_HUMAN    |                        | 99.0         | TNVELQNLTAEEVWPR  | 0.0016489    | 1852.00708  | 927.0108    | 1852.005371 | 927.0100098 | 2  | 14      | 44.5011 |
| 104  | 26.4 | 26.4 | 30.26  | sp Q9NZ18 F2B1_HUMAN    |                        | 99.0         | VSYPDEIQAGQGPENGR | -0.00367827  | 1871.897705 | 936.9561    | 1871.901367 | 936.9578468 | 2  | 10      | 32.0475 |
| 104  | 26.4 | 26.4 | 30.26  | sp Q9NZ18 F2B1_HUMAN    |                        | 98.5         | IAPPETPSDK        | -0.000281722 | 1053.53813  | 527.774     | 1053.53418  | 527.7744141 | 2  | 8       | 15.5593 |
| 104  | 26.4 | 26.4 | 30.26  | sp Q9NZ18 F2B1_HUMAN    |                        | 98.4         | MILEMHK           | -0.000898174 | 1013.539246 | 507.7769    | 1013.540222 | 507.7773743 | 2  | 9       | 31.9006 |
| 104  | 26.4 | 26.4 | 30.26  | sp Q9NZ18 F2B1_HUMAN    |                        | 97.1         | QQQVDIPLR         | -0.00118383  | 1095.602417 | 548.8085    | 1095.603638 | 548.809082  | 2  | 9       | 27.5828 |
| 104  | 26.4 | 26.4 | 30.26  | sp Q9NZ18 F2B1_HUMAN    |                        | 91.7         | EENFFQPK          | -0.00279333  | 966.4418945 | 484.2282    | 966.4447021 | 484.2296143 | 2  | 8       | 27.4711 |
| 1378 | 2.02 | 2.02 | 9.655  | sp Q9NZL9-2 NJDT4_HUMAN |                        | 99.0         | SEQEDSVLLVSSSR    | 0.0225197    | 1577.764648 | 789.8896    | 1577.742065 | 789.8782959 | 2  | 11      | 32.15   |
| 527  | 8.67 | 8.67 | 14.16  | sp Q9NZL4 HPBP1_HUMAN   |                        | 99.0         | ALFASCLVR         | 0.00123425   | 1148.638916 | 575.3267    | 1148.637573 | 575.3260498 | 2  | 8       | 48.4871 |
| 527  | 8.67 | 8.67 | 14.16  | sp Q9NZL4 HPBP1_HUMAN   |                        | 99.0         | LQTCFSPADDSMDR    | -0.0017334   | 1841.790649 | 921.9026    | 1841.792358 | 921.9035034 | 2  | 8       | 33.3751 |
| 527  | 8.67 | 8.67 | 14.16  | sp Q9NZL4 HPBP1_HUMAN   |                        | 99.0         | SAPLQNLVGHPEHK    |              |             |             |             |             |    |         |         |





|      |       |       |        |                                                                         |                        |                         |             |  |                       |              |             |          |             |             |   |    |         |
|------|-------|-------|--------|-------------------------------------------------------------------------|------------------------|-------------------------|-------------|--|-----------------------|--------------|-------------|----------|-------------|-------------|---|----|---------|
| 464  | 9.78  | 9.78  | 5.472  | sp Q9UKV3 ACINJ1_HUMAN                                                  | 87.6                   | IEELALAK                |             |  |                       | 0.0113497    | 885.5285034 | 443.7715 | 885.517509  | 443.7658386 | 2 | 8  | 28.7352 |
| 464  | 9.78  | 9.78  | 5.472  | sp Q9UKV3 ACINJ1_HUMAN                                                  | 86.5                   | SOQEQLYR                |             |  |                       | -0.00264089  | 1116.538452 | 569.2765 | 1116.541138 | 559.277832  | 2 | 8  | 16.3855 |
| 2268 | 0.13  | 0.13  | 0.13   | 5.472                                                                   | sp Q9UKV3 ACINJ1_HUMAN | 82.1                    | KPSQITETSLK |  |                       | -0.0194827   | 1302.737427 | 652.376  | 1302.739502 | 652.3770142 | 2 | 6  | 26.2473 |
| 1043 | 3.83  | 3.86  | 6.882  | sp Q9UKX7 NJUP50_HUMAN; sp Q9UKX7-2 NJUP50_HUMAN                        | 77.8                   | EFGIMVK                 |             |  | Oxidation(M)@5        | 0.032396901  | 838.458252  | 420.2364 | 838.4259033 | 420.2202148 | 2 | 5  | 39.7272 |
| 1043 | 3.83  | 3.86  | 6.882  | sp Q9UKX7 NJUP50_HUMAN; sp Q9UKX7-2 NJUP50_HUMAN                        | 99.0                   | VAFGSLAANGPTLLVDK       |             |  |                       | -6.74E-05    | 1659.883301 | 830.9489 | 1659.883179 | 830.9488525 | 2 | 8  | 40.2331 |
| 1043 | 3.83  | 3.86  | 6.882  | sp Q9UKX7 NJUP50_HUMAN; sp Q9UKX7-2 NJUP50_HUMAN                        | 99.0                   | VAETGSPSLFGSTK          |             |  |                       | -0.00062463  | 1521.766846 | 761.8907 | 1521.767456 | 761.8909912 | 2 | 7  | 28.7901 |
| 1043 | 3.83  | 3.86  | 6.882  | sp Q9UKX7 NJUP50_HUMAN; sp Q9UKX7-2 NJUP50_HUMAN                        | 96.7                   | VAQSLDYLFGVSTK          |             |  | Deamidated(Q)@6       | -0.044919301 | 1522.704712 | 762.3596 | 1522.751465 | 762.3830566 | 2 | 7  | 28.9209 |
| 1577 | 1.54  | 1.54  | 14.34  | sp Q9UKY7 CDV3_HUMAN                                                    | 98.4                   | LQDLNDGYALVENK          |             |  |                       | -0.00426589  | 1674.861816 | 838.4382 | 1674.857666 | 838.4360962 | 2 | 7  | 35.175  |
| 1577 | 1.54  | 1.54  | 14.34  | sp Q9UKY7 CDV3_HUMAN                                                    | 87.9                   | KTPQGPPPEIYSDTQFSLQSTAK |             |  |                       | 0.00151026   | 2519.255859 | 840.7592 | 2519.254395 | 840.758728  | 3 | 7  | 37.5402 |
| 1125 | 3.23  | 3.23  | 10.82  | sp Q9UL46 PSME2_HUMAN                                                   | 99.0                   | VFATQVITTSK             |             |  | missed K-T@1          | -0.0069351   | 1122.585327 | 562.2999 | 1122.592041 | 562.3033447 | 2 | 10 | 24.727  |
| 1125 | 3.23  | 3.23  | 10.82  | sp Q9UL46 PSME2_HUMAN                                                   | 94.9                   | ETHMDIYR                |             |  |                       | 0.00526222   | 1049.465332 | 525.7399 | 1049.460083 | 525.7373047 | 2 | 6  | 13.3171 |
| 1125 | 3.23  | 3.23  | 10.82  | sp Q9UL46 PSME2_HUMAN                                                   | 88.0                   | AMVLDL                  |             |  |                       | -0.00722375  | 816.4454956 | 409.23   | 816.4527588 | 409.2336426 | 2 | 6  | 32.8352 |
| 1371 | 2.02  | 2.02  | 10.67  | sp Q9ULC4 MCTS1_HUMAN; sp Q9ULC4-3 MCTS1_HUMAN; sp Q9ULC4-2 MCTS1_HUMAN | 99.0                   | FVLSGAINCMGLTSPGAK      |             |  | Carbamidomethyl(C)@10 | 0.01878171   | 1918.966431 | 960.4905 | 1918.964478 | 960.489502  | 2 | 8  | 44.7142 |
| 2209 | 0.15  | 0.45  | 1.005  | sp Q9ULD4 BRPF3_HUMAN                                                   | 84.1                   | LIEIR                   |             |  |                       | -0.00184462  | 755.4902954 | 378.7524 | 755.4905396 | 378.752533  | 2 | 5  | 35.933  |
| 2209 | 0.15  | 0.45  | 1.005  | sp Q9ULD4 BRPF3_HUMAN                                                   | 76.3                   | IYDPLK                  |             |  |                       | -8.86E-05    | 747.416687  | 374.7156 | 747.416687  | 374.7156372 | 2 | 6  | 26.4040 |
| 2691 | 0.05  | 0.05  | 0.5091 | sp Q9ULL1 PKHG1_HUMAN                                                   | 85.1                   | KANQLK                  |             |  | Carbamyl(K)@1         | 0.00330212   | 856.5126964 | 429.2654 | 856.5130615 | 429.2637939 | 2 | 7  | 34.8228 |
| 408  | 10.89 | 10.89 | 16.56  | sp Q9ULV4 COR1C_HUMAN                                                   | 99.0                   | AIFLADGNVFTTGFSR        |             |  |                       | 0.00337179   | 1714.871216 | 858.4429 | 1714.86792  | 858.4412231 | 2 | 11 | 50.6916 |
| 408  | 10.89 | 10.89 | 16.56  | sp Q9ULV4 COR1C_HUMAN                                                   | 99.0                   | NILDSKPTAK              |             |  |                       | -0.000569376 | 1199.650513 | 600.8325 | 1199.651001 | 600.8327637 | 2 | 9  | 15.2186 |
| 408  | 10.89 | 10.89 | 16.56  | sp Q9ULV4 COR1C_HUMAN                                                   | 99.0                   | VTVDSFSFCVAPNR          |             |  | Carbamidomethyl(C)@8  | -0.01610737  | 137.968699  | 769.8557 | 137.968364  | 769.8564453 | 2 | 13 | 37.0534 |
| 408  | 10.89 | 10.89 | 16.56  | sp Q9ULV4 COR1C_HUMAN                                                   | 99.0                   | NDQCDDYR                |             |  | Carbamidomethyl(C)@4  | 0.00146206   | 1197.473511 | 599.744  | 1197.472046 | 599.7432861 | 2 | 7  | 17.6481 |
| 408  | 10.89 | 10.89 | 16.56  | sp Q9ULV4 COR1C_HUMAN                                                   | 97.7                   | NGSLCTASK               |             |  | Carbamidomethyl(C)@6  | 0.00705899   | 1           |          |             |             |   |    |         |









[illegible]
