# Supplementary material
Source: PubMed Central journal article supplement (PMC4350037)
Supplement: supp_M114.044321_mcp.M114.044321-6.pdf [file supp_M114.044321_mcp.M114.044321-6.pdf]

Supplementary Table 10. Overview of peptide identification results for yeast cell lysate (tryptic digest, Promega) acquired on Q-Exactive mass spectrometer (Thermo Scientific).

| N   | Sequence |       |          | Accessions | Conf | Sequence                   | Modifications         | Cleavages          | dMass        | Prec.MW     | Prec.m.z | Theor.MW    | Theor.m.z   | Theor.z | Sc | Time    |
|-----|----------|-------|----------|------------|------|----------------------------|-----------------------|--------------------|--------------|-------------|----------|-------------|-------------|---------|----|---------|
|     | Unused   | Total | Coverage |            |      |                            |                       |                    |              |             |          |             |             |         |    |         |
| 241 | 11.4     | 11.4  |          | 40 YAL003W | 99.0 | AFQSAYPEFSR                |                       |                    | 0.000866572  | 1301.605103 | 651.8098 | 1301.604004 | 651.8093262 | 2       | 11 | 31.9519 |
| 241 | 11.4     | 11.4  |          | 40 YAL003W | 99.0 | LQINCIVVEDDK               | Carbamidomethyl(C)@5  |                    | -0.00262269  | 1331.636475 | 666.8255 | 1331.63916  | 666.8268433 | 2       | 10 | 28.8055 |
| 241 | 11.4     | 11.4  |          | 40 YAL003W | 99.0 | SYIEGTAVSQADVTVFK          |                       |                    | -0.00549955  | 1813.904297 | 907.9594 | 1813.90979  | 907.9621582 | 2       | 10 | 39.5323 |
| 241 | 11.4     | 11.4  |          | 40 YAL003W | 99.0 | VSLDDLQQSIEEDHVVQSTDIAAMQK | Deamidated(Q)@8       |                    | 0.029582599  | 3044.405273 | 1015.809 | 3044.376709 | 1015.799561 | 3       | 11 | 49.5161 |
| 241 | 11.4     | 11.4  |          | 40 YAL003W | 99.0 | WFNHIASK                   |                       |                    | 0.00100485   | 1001.509277 | 501.7619 | 1001.508301 | 501.7614136 | 2       | 10 | 22.3888 |
| 241 | 11.4     | 11.4  |          | 40 YAL003W | 99.0 | AFQSAYPEFSR                |                       |                    | 0.00180406   | 1301.605835 | 651.8102 | 1301.604004 | 651.8093262 | 2       | 9  | 31.4351 |
| 241 | 11.4     | 11.4  |          | 40 YAL003W | 99.0 | LQINCIVVEDDK               | Carbamidomethyl(C)@5  |                    | 0.000306995  | 1331.639526 | 666.827  | 1331.63916  | 666.8268433 | 2       | 10 | 29.3241 |
| 241 | 11.4     | 11.4  |          | 40 YAL003W | 99.0 | SYIEGTAVSQADVTVFK          |                       |                    | 0.000229916  | 1813.910034 | 907.9623 | 1813.90979  | 907.9621582 | 2       | 7  | 40.2277 |
| 241 | 11.4     | 11.4  |          | 40 YAL003W | 99.0 | SYIEGTAVSQADVTVFK          | Deamidated(Q)@10      |                    | 0.010598     | 1814.904419 | 908.4595 | 1814.893799 | 908.4541626 | 2       | 8  | 40.0544 |
| 241 | 11.4     | 11.4  |          | 40 YAL003W | 98.1 | QLNASLADK                  |                       |                    | 0.00018789   | 958.5084839 | 480.2615 | 958.5083618 | 480.2614441 | 2       | 8  | 17.2285 |
| 12  | 48.82    | 48.82 | 51.49    | YAL005C    | 99.0 | AETISWLDSNTTASK            |                       |                    | 0.000778723  | 1751.822021 | 876.9183 | 1751.821411 | 876.9179688 | 2       | 17 | 36.9958 |
| 12  | 48.82    | 48.82 | 51.49    | YAL005C    | 99.0 | ARFEELCADLFR               | Carbamidomethyl(C)@7  | missed R-F@2       | -0.000923371 | 1525.733887 | 763.8742 | 1525.734741 | 763.8746338 | 2       | 17 | 42.5755 |
| 12  | 48.82    | 48.82 | 51.49    | YAL005C    | 99.0 | ATAGDTHLGGEDFDNR           |                       |                    | -4.44E-05    | 1674.723389 | 559.2484 | 1674.723389 | 559.2484131 | 3       | 11 | 20.6898 |
| 12  | 48.82    | 48.82 | 51.49    | YAL005C    | 99.0 | AVGIDLGTTYSCVAHFANDR       | Carbamidomethyl(C)@12 |                    | 0.00363254   | 2166.02002  | 723.014  | 2166.016357 | 723.0127563 | 3       | 13 | 45.2561 |
| 12  | 48.82    | 48.82 | 51.49    | YAL005C    | 99.0 | DAGTIAGLNVLR               |                       |                    | -0.00145518  | 1198.665527 | 600.34   | 1198.666992 | 600.3407593 | 2       | 15 | 39.6278 |
| 12  | 48.82    | 48.82 | 51.49    | YAL005C    | 99.0 | DAVVTVPAYFNDSQR            |                       | cleaved N-D@N-term | 0.000634888  | 1680.811523 | 841.413  | 1680.810791 | 841.4126587 | 2       | 9  | 38.4789 |
| 12  | 48.82    | 48.82 | 51.49    | YAL005C    | 99.0 | EEFDDKLK                   |                       | missed K-L@6       | 0.00136375   | 1022.49353  | 512.254  | 1022.492065 | 512.2532959 | 2       | 7  | 17.2204 |
| 12  | 48.82    | 48.82 | 51.49    | YAL005C    | 99.0 | ELQDIANPIMSK               |                       |                    | -0.00170014  | 1357.689453 | 679.852  | 1357.691162 | 679.8528442 | 2       | 10 | 34.4493 |
| 12  | 48.82    | 48.82 | 51.49    | YAL005C    | 99.0 | ETAESYLGAKE                |                       |                    | -0.00131146  | 1067.512329 | 534.7634 | 1067.51355  | 534.7640381 | 2       | 10 | 22.5586 |
| 12  | 48.82    | 48.82 | 51.49    | YAL005C    | 99.0 | FEELCADLFR                 | Carbamidomethyl(C)@5  |                    | -0.000146864 | 1298.596436 | 650.3055 | 1298.596558 | 650.305542  | 2       | 12 | 44.5773 |
| 12  | 48.82    | 48.82 | 51.49    | YAL005C    | 99.0 | FELSGIPPAPR                |                       |                    | -0.00121403  | 1182.638428 | 592.3265 | 1182.639648 | 592.3271484 | 2       | 13 | 36.6688 |
| 12  | 48.82    | 48.82 | 51.49    | YAL005C    | 99.0 | IINEPTAAAIAYGLDK           |                       |                    | 0.00362917   | 1658.891724 | 830.4531 | 1658.887939 | 830.4512329 | 2       | 17 | 42.7626 |
| 12  | 48.82    | 48.82 | 51.49    | YAL005C    | 99.0 | LIDVDGKPKIQVEFK            |                       |                    | 0.00053159   | 1727.946289 | 864.9804 | 1727.945801 | 864.9801636 | 2       | 9  | 36.9375 |
| 12  | 48.82    | 48.82 | 51.49    | YAL005C    | 99.0 | LVNHFIQEFK                 |                       |                    | 0.00409522   | 1273.686035 | 637.8503 | 1273.681885 | 637.8482056 | 2       | 17 | 33.4867 |
| 12  | 48.82    | 48.82 | 51.49    | YAL005C    | 99.0 | NFNDPEVQADMK               | Deamidated(N)@1       |                    | -5.81E-05    | 1407.597656 | 704.8061 | 1407.597656 | 704.8060913 | 2       | 11 | 29.5361 |
| 12  | 48.82    | 48.82 | 51.49    | YAL005C    | 99.0 | NFTPEQISSMVLGK             |                       |                    | 0.00524995   | 1549.786255 | 775.9004 | 1549.781006 | 775.8977661 | 2       | 14 | 50.1681 |
| 12  | 48.82    | 48.82 | 51.49    | YAL005C    | 99.0 | NQAAMNPSNTVFDAK            |                       |                    | -0.00100113  | 1606.740112 | 804.3773 | 1606.740967 | 804.3777466 | 2       | 16 | 28.9727 |
| 12  | 48.82    | 48.82 | 51.49    | YAL005C    | 99.0 | SINPDEAVAYGAAVQAAILTGEDESK |                       |                    | 0.0012853    | 2576.26123  | 1289.138 | 2576.260498 | 1289.137573 | 2       | 16 | 56.9292 |
| 12  | 48.82    | 48.82 | 51.49    | YAL005C    | 99.0 | SQVDEIVLVGGSTR             |                       |                    | -0.00304101  | 1458.764648 | 730.3896 | 1458.767822 | 730.3911743 | 2       | 19 | 34.6106 |
| 12  | 48.82    | 48.82 | 51.49    | YAL005C    | 99.0 | TTPSFVAFDTTER              |                       |                    | 0.00490327   | 1470.704102 | 736.3593 | 1470.699097 | 736.3568115 | 2       | 10 | 37.9725 |
| 12  | 48.82    | 48.82 | 51.49    | YAL005C    | 99.0 | VDIANDQGNR                 |                       |                    | -0.00138204  | 1213.603638 | 607.8091 | 1213.605103 | 607.8098145 | 2       | 14 | 19.5512 |
| 12  | 48.82    | 48.82 | 51.49    | YAL005C    | 99.0 | VNDVVTVPAYFNDSQR           |                       |                    | 0.00103047   | 1893.923096 | 947.9688 | 1893.922119 | 947.9683228 | 2       | 10 | 39.147  |
| 12  | 48.82    | 48.82 | 51.49    | YAL005C    | 99.0 | LVTDYFNGK                  | Deamidated(N)@7       |                    | -0.000365715 | 1056.512451 | 529.2635 | 1056.512817 | 529.2636719 | 2       | 10 | 30.8506 |
| 12  | 48.82    | 48.82 | 51.49    | YAL005C    | 99.0 | AETISWLDSNTTASK            |                       |                    | -0.00711027  | 1751.814331 | 876.9144 | 1751.821411 | 876.9179688 | 2       | 7  | 36.4829 |
| 12  | 48.82    | 48.82 | 51.49    | YAL005C    | 99.0 | ARFEELCADLFR               | Carbamidomethyl(C)@7  | missed R-F@2       | 0.00212105   | 1525.736816 | 509.5862 | 1525.734741 | 509.5855408 | 3       | 13 | 42.6407 |
| 12  | 48.82    | 48.82 | 51.49    | YAL005C    | 99.0 | ATAGDTHLGGEDFDNR           |                       |                    | -0.00150921  | 1674.721924 | 559.2479 | 1674.723389 | 559.2484131 | 3       | 11 | 21.2058 |
| 12  | 48.82    | 48.82 | 51.49    | YAL005C    | 99.0 | DAGTIAGLNVLR               | Carbamyl@N-term       |                    | -0.00775793  | 1241.665039 | 621.8398 | 1241.672852 | 621.843689  | 2       | 9  | 45.8486 |
| 12  | 48.82    | 48.82 | 51.49    | YAL005C    | 99.0 | EEFDDKLK                   |                       | missed K-L@6       | -0.00022316  | 1022.491821 | 512.2532 | 1022.492065 | 512.2532959 | 2       | 7  | 17.7368 |
| 12  | 48.82    | 48.82 | 51.49    | YAL005C    | 99.0 | ETAESYLGAKE                |                       |                    | -0.000456967 | 1067.513062 | 534.7638 | 1067.51355  | 534.7640381 | 2       | 9  | 21.9976 |
| 12  | 48.82    | 48.82 | 51.49    | YAL005C    | 99.0 | FEELCADLFR                 | Carbamidomethyl(C)@5  |                    | 0.000789876  | 1298.59729  | 650.3059 | 1298.596558 | 650.305542  | 2       | 10 | 45.0945 |
| 12  | 48.82    | 48.82 | 51.49    | YAL005C    | 99.0 | FEELCADLFR                 | Carbamidomethyl(C)@5  |                    | 0.00313268   | 1298.599731 | 650.3071 | 1298.596558 | 650.305542  | 2       | 9  | 45.6111 |
| 12  | 48.82    | 48.82 | 51.49    | YAL005C    | 99.0 | FEELCADLFR                 | Carbamidomethyl(C)@5  |                    | -0.00567985  | 1298.59082  | 650.3027 | 1298.596558 | 650.305542  | 2       | 7  | 46.1311 |
| 12  | 48.82    | 48.82 | 51.49    | YAL005C    | 99.0 | FELSGIPPAPR                |                       |                    | 0.000688573  | 1182.640503 | 592.3275 | 1182.639648 | 592.3271484 | 2       | 12 | 36.157  |
| 12  | 48.82    | 48.82 | 51.49    | YAL005C    | 99.0 | FELSGIPPAPR                |                       |                    | -0.000550269 | 1182.639038 | 592.3268 | 1182.639648 | 592.3271484 | 2       | 13 | 37.1847 |
| 12  | 48.82    | 48.82 | 51.49    | YAL005C    | 99.0 | FELSGIPPAPR                |                       |                    | 0.00537776   | 1182.64502  | 592.3298 | 1182.639648 | 592.3271484 | 2       | 11 | 38.373  |
| 12  | 48.82    | 48.82 | 51.49    | YAL005C    | 99.0 | FELSGIPPAPR                |                       |                    | -0.00123364  | 1182.638428 | 592.3265 | 1182.639648 | 592.3271484 | 2       | 12 | 37.6951 |
| 12  | 48.82    | 48.82 | 51.49    | YAL005C    | 99.0 | FELSGIPPAPR                |                       |                    | 0.0092644    | 1182.649048 | 592.3318 | 1182.639648 | 592.3271484 | 2       | 11 | 38.8828 |
| 12  | 48.82    | 48.82 | 51.49    | YAL005C    | 99.0 | FELSGIPPAPR                |                       |                    | 0.0053091    | 1182.64502  | 592.3298 | 1182.639648 | 592.3271484 | 2       | 10 | 39.4323 |
| 12  | 48.82    | 48.82 | 51.49    | YAL005C    | 99.0 | IINEPTAAAIAYGLDK           |                       |                    | -0.00338484  | 1658.884521 | 830.4495 | 1658.887939 | 830.4512329 | 2       | 8  | 43.2816 |
| 12  | 48.82    | 48.82 | 51.49    | YAL005C    | 99.0 | LIDVDGKPKIQVEFK            |                       |                    | -0.000934369 | 1727.944824 | 576.9889 | 1727.945801 | 576.9891968 | 3       | 12 | 36.8617 |



[illegible]

























|     |       |       |       |         |      |                   |  |  |                       |              |             |          |             |             |   |    |         |
|-----|-------|-------|-------|---------|------|-------------------|--|--|-----------------------|--------------|-------------|----------|-------------|-------------|---|----|---------|
| 146 | 16.66 | 18.8  | 25.26 | YBR263W | 99.0 | HSITLIPSENFTSK    |  |  |                       | 0.00112818   | 1572.815674 | 525.2792 | 1572.814819 | 525.2788696 | 3 | 9  | 34.3092 |
| 146 | 16.66 | 18.8  | 25.26 | YBR263W | 98.1 | SALFPSGLR         |  |  |                       | -0.00193032  | 946.5216675 | 474.2681 | 946.5236206 | 474.2690735 | 2 | 7  | 34.5569 |
| 146 | 16.66 | 18.8  | 25.26 | YBR263W | 93.4 | YGGNEIIDK         |  |  |                       | 0.0321244    | 1170.587891 | 586.3012 | 1170.555664 | 586.2851563 | 2 | 8  | 24.4415 |
| 146 | 16.66 | 18.8  | 25.26 | YBR263W | 85.1 | EEFSQVAK          |  |  |                       | 0.00149476   | 936.4568481 | 469.2357 | 936.4552612 | 469.2348938 | 2 | 7  | 15.7936 |
| 146 | 16.66 | 18.8  | 25.26 | YBR263W | 82.3 | GAMIFFR           |  |  | Oxidation(M)@3        | -0.000729807 | 856.4259033 | 429.2202 | 856.4265747 | 429.2205505 | 2 | 6  | 32.2491 |
| 783 | 2     | 2     | 8.955 | YBR269C | 99.0 | NDIGSFSPFEFSK     |  |  |                       | 7.96E-05     | 1326.609253 | 664.3119 | 1326.609253 | 664.3118896 | 2 | 9  | 33.809  |
| 926 | 1.12  | 1.12  | 4.009 | YBR283C | 96.3 | GTNNVYPIK         |  |  |                       | 0.000315184  | 1004.52948  | 503.272  | 1004.529114 | 503.2718201 | 2 | 7  | 19.8103 |
| 926 | 1.12  | 1.12  | 4.009 | YBR283C | 89.7 | NEPTHICK          |  |  | Carbamidomethyl(C)@8  | -0.000520961 | 1110.548706 | 556.2816 | 1110.549194 | 556.2818604 | 2 | 6  | 10.9193 |
| 278 | 10.07 | 10.07 | 8.618 | YBR286W | 99.0 | DYASVVPPR         |  |  |                       | 0.00470916   | 1002.51825  | 502.2664 | 1002.513428 | 502.2640076 | 2 | 9  | 23.5018 |
| 278 | 10.07 | 10.07 | 8.618 | YBR286W | 99.0 | HTVATVGVYK        |  |  |                       | -0.000224416 | 1170.639526 | 586.327  | 1170.639648 | 586.3271484 | 2 | 7  | 20.5104 |
| 278 | 10.07 | 10.07 | 8.618 | YBR286W | 99.0 | LVEIPNLGCEEK      |  |  | Carbamidomethyl(C)@9  | -0.000957966 | 1399.700928 | 700.8577 | 1399.70166  | 700.8581543 | 2 | 7  | 36.6499 |
| 278 | 10.07 | 10.07 | 8.618 | YBR286W | 99.0 | TQNIADTK          |  |  |                       | -0.00482354  | 1002.529846 | 502.2722 | 1002.534546 | 502.2745667 | 2 | 9  | 16.281  |
| 278 | 10.07 | 10.07 | 8.618 | YBR286W | 99.0 | QIALIER           |  |  |                       | -0.000281298 | 841.5018921 | 421.7582 | 841.5021362 | 421.7583618 | 2 | 7  | 26.3286 |
| 278 | 10.07 | 10.07 | 8.618 | YBR286W | 99.0 | LVEIPNLGCEEK      |  |  | Carbamidomethyl(C)@9  | 0.00222738   | 1399.704102 | 700.8593 | 1399.70166  | 700.8581543 | 2 | 7  | 36.138  |
| 278 | 10.07 | 10.07 | 8.618 | YBR286W | 76.5 | DYASVVPPR         |  |  |                       | -0.00820253  | 1002.505249 | 502.2599 | 1002.513428 | 502.2640076 | 2 | 7  | 24.934  |
| 681 | 2.42  | 2.42  | 6.534 | YBR287W | 99.0 | MNSSFLSSSIGDK     |  |  |                       | -0.00454942  | 1458.661499 | 730.338  | 1458.666016 | 730.340332  | 2 | 7  | 31.88   |
| 681 | 2.42  | 2.42  | 6.534 | YBR287W | 89.2 | LLIGSIIGR         |  |  |                       | -0.000237611 | 940.6066895 | 471.3106 | 940.6069336 | 471.3107605 | 2 | 5  | 42.3929 |
| 283 | 10    | 10    | 26.69 | YCL009C | 99.0 | GFNIDSLVVCNTEVK   |  |  | Carbamidomethyl(C)@10 | -0.00157812  | 1693.83313  | 847.9238 | 1693.834473 | 847.9245605 | 2 | 6  | 46.1283 |
| 283 | 10    | 10    | 26.69 | YCL009C | 99.0 | HEHLNDITNLNNFGGR  |  |  |                       | -0.00071029  | 1950.928833 | 651.3169 | 1950.929688 | 651.3171387 | 3 | 14 | 32.67   |
| 283 | 10    | 10    | 26.69 | YCL009C | 99.0 | MTIVLQGDGVVEQAR   |  |  |                       | 0.00603874   | 1742.904419 | 872.4595 | 1742.89856  | 872.456543  | 2 | 6  | 34.7037 |
| 283 | 10    | 10    | 26.69 | YCL009C | 99.0 | QFHPANLPASEVLR    |  |  |                       | 0.000298873  | 1577.831665 | 526.9512 | 1577.831421 | 526.9511108 | 3 | 10 | 32.7308 |
| 283 | 10    | 10    | 26.69 | YCL009C | 99.0 | QHVNLCLVQNEPGVLSR |  |  | Carbamidomethyl(C)@6  | 0.00710372   | 1962.0177   | 655.0132 | 1962.010498 | 655.0108032 | 3 | 13 | 34.4855 |
| 283 | 10    | 10    | 26.   |         |      |                   |  |  |                       |              |             |          |             |             |   |    |         |









[illegible]





[illegible]







|     |       |       |       |         |      |                          |                 |              |             |          |             |             |   |    |         |
|-----|-------|-------|-------|---------|------|--------------------------|-----------------|--------------|-------------|----------|-------------|-------------|---|----|---------|
| 126 | 18.26 | 18.26 | 44.94 | YDR050C | 99.0 | TLDVVER                  | Carbamyl@N-term | 0.000862562  | 830.4506836 | 416.2326 | 830.4497681 | 416.2321777 | 2 | 8  | 18.8916 |
| 126 | 18.26 | 18.26 | 44.94 | YDR050C | 99.0 | WVILGHSER                | Carbamyl@N-term | 0.00104884   | 1138.589478 | 570.302  | 1138.588379 | 570.3014526 | 2 | 10 | 42.6001 |
| 126 | 18.26 | 18.26 | 44.94 | YDR050C | 99.0 | ASGAFTGENSVQIK           | Carbamyl@N-term | -0.000411347 | 1522.72583  | 762.3702 | 1522.726318 | 762.3704224 | 2 | 15 | 26.5321 |
| 126 | 18.26 | 18.26 | 44.94 | YDR050C | 99.0 | ASGAFTGENSVQIK           | Carbamyl@N-term | -0.0016628   | 1522.724731 | 762.3696 | 1522.726318 | 762.3704224 | 2 | 6  | 27.5701 |
| 126 | 18.26 | 18.26 | 44.94 | YDR050C | 99.0 | ILYGGSANGSNAVTFK         | Carbamyl@N-term | 0.000419597  | 1597.810425 | 799.9125 | 1597.810059 | 799.9122925 | 2 | 13 | 30.9423 |
| 126 | 18.26 | 18.26 | 44.94 | YDR050C | 99.0 | ILYGGSANGSNAVTFK         | Carbamyl@N-term | -0.00104525  | 1597.808838 | 799.9117 | 1597.810059 | 799.9122925 | 2 | 15 | 31.4499 |
| 126 | 18.26 | 18.26 | 44.94 | YDR050C | 99.0 | KPQVTVGAAQAYLK           | Carbamyl@N-term | 0.0048846    | 1515.845825 | 506.2892 | 1515.840942 | 506.2875977 | 3 | 17 | 23.6564 |
| 126 | 18.26 | 18.26 | 44.94 | YDR050C | 99.0 | QLNAVLEEVK               | Carbamyl@N-term | -0.00124286  | 1141.633057 | 571.8238 | 1141.634277 | 571.8244019 | 2 | 11 | 33.2456 |
| 126 | 18.26 | 18.26 | 44.94 | YDR050C | 99.0 | TFVGGNFK                 | Carbamyl@N-term | -0.00748802  | 1015.505249 | 508.7599 | 1015.512695 | 508.7636414 | 2 | 10 | 36.491  |
| 126 | 18.26 | 18.26 | 44.94 | YDR050C | 99.0 | TLDVVER                  | Carbamyl@N-term | -0.00112475  | 830.4486694 | 416.2316 | 830.4497681 | 416.2321777 | 2 | 8  | 18.3768 |
| 126 | 18.26 | 18.26 | 44.94 | YDR050C | 99.0 | WVILGHSER                | Carbamyl@N-term | 0.000932036  | 1095.583496 | 548.799  | 1095.58252  | 548.7985229 | 2 | 11 | 29.3135 |
| 126 | 18.26 | 18.26 | 44.94 | YDR050C | 98.1 | ADVDFGLVGGASLKPEFVDIINSR | Carbamyl@N-term | 0.00127385   | 2518.308105 | 840.4433 | 2518.306641 | 840.4428711 | 3 | 8  | 57.6997 |
| 126 | 18.26 | 18.26 | 44.94 | YDR050C | 90.3 | WVILGHSER                | Deamidated(N)@7 | -0.000879827 | 1095.581787 | 366.2012 | 1095.58252  | 366.2014465 | 3 | 6  | 30.2498 |
| 126 | 18.26 | 18.26 | 44.94 | YDR050C | 72.8 | TFVGGNFK                 | Deamidated(N)@7 | 0.000975335  | 1016.497681 | 509.2561 | 1016.496704 | 509.2556458 | 2 | 6  | 38.5223 |
| 910 | 1.27  | 1.27  | 1.444 | YDR062W | 99.0 | WDIEEVIR                 | Deamidated(N)@7 | 0.000738793  | 1058.540527 | 530.2775 | 1058.539673 | 530.2770996 | 2 | 7  | 45.382  |
| 910 | 1.27  | 1.27  | 1.444 | YDR062W | 94.8 | WDIEEVIR                 | Deamidated(N)@7 | 0.054756701  | 1058.594482 | 530.3045 | 1058.539673 | 530.2770996 | 2 | 6  | 45.5072 |
| 885 | 1.49  | 1.49  | 7.692 | YDR063W | 99.0 | FVLTAYPPTTK              | Deamidated(N)@7 | 0.000630002  | 1240.671021 | 621.3428 | 1240.670288 | 621.3424683 | 2 | 7  | 33.5568 |
| 229 | 11.95 | 11.95 | 53.57 | YDR064W | 99.0 | GLTPSQIGVLLR             | Deamidated(N)@7 | -0.000992663 | 1252.749512 | 627.382  | 1252.750366 | 627.3824463 | 2 | 12 | 44.9079 |
| 229 | 11.95 | 11.95 | 53.57 | YDR064W | 99.0 | LILIESR                  | Deamidated(N)@7 | -0.000114393 | 842.5224609 | 422.2685 | 842.522583  | 422.2685547 | 2 | 8  | 29.7669 |
| 229 | 11.95 | 11.95 | 53.57 | YDR064W | 99.0 | LSESVEIQIVK              | Deamidated(N)@7 | -0.000758208 | 1330.733643 | 666.3741 | 1330.734375 | 666.3744507 | 2 | 15 | 43.7984 |
| 229 | 11.95 | 11.95 | 53.57 | YDR064W | 99.0 | SNGLAPEIPEDLYYLIK        | Deamidated(N)@7 | 0.00104373   | 1934.004639 | 968.0096 | 1934.003662 | 968.0090942 | 2 | 12 | 58.259  |
| 229 | 11.95 | 11.95 | 53.57 | YDR064W | 99.0 | TVAVLPNNWK               | Deamidated(N)@7 | 0.000853795  | 1123.639893 | 562.8272 | 1123.639038 | 562.8267822 | 2 | 11 | 36.2084 |
| 229 | 11.95 | 11.95 |       |         |      |                          |                 |              |             |          |             |             |   |    |         |





















|     |      |       |       |         |      |                      |                       |              |  |              |             |          |             |             |   |    |         |
|-----|------|-------|-------|---------|------|----------------------|-----------------------|--------------|--|--------------|-------------|----------|-------------|-------------|---|----|---------|
| 344 | 8.29 | 23.75 | 25.37 | YER103W | 99.0 | TTPSYVAFTDTER        |                       |              |  | -0.000526782 | 1486.693481 | 744.354  | 1486.69397  | 744.354248  | 2 | 11 | 31.9152 |
| 344 | 8.29 | 23.75 | 25.37 | YER103W | 99.0 | ARFEELCADLFR         | Carbamidomethyl(C)@7  | missed R-F@2 |  | -0.000923371 | 1525.733887 | 763.8742 | 1525.734741 | 763.8746338 | 2 | 17 | 42.5755 |
| 344 | 8.29 | 23.75 | 25.37 | YER103W | 99.0 | ARFEELCADLFR         | Carbamidomethyl(C)@7  | missed R-F@2 |  | 0.00212105   | 1525.736816 | 509.5862 | 1525.734741 | 509.5855408 | 3 | 13 | 42.6407 |
| 344 | 8.29 | 23.75 | 25.37 | YER103W | 99.0 | AVGIDLGTTYSCVAHFANDR | Carbamidomethyl(C)@12 |              |  | 0.00363254   | 2166.02002  | 723.014  | 2166.016357 | 723.0127563 | 3 | 13 | 45.2561 |
| 344 | 8.29 | 23.75 | 25.37 | YER103W | 99.0 | DAGTIAGLNVLR         |                       |              |  | -0.00145518  | 1198.665527 | 600.34   | 1198.666992 | 600.3407593 | 2 | 15 | 39.6278 |
| 344 | 8.29 | 23.75 | 25.37 | YER103W | 99.0 | DAGTIAGLNVLR         | Carbamyl@N-term       |              |  | -0.00775793  | 1241.665039 | 621.8398 | 1241.672852 | 621.843689  | 2 | 9  | 45.8486 |
| 344 | 8.29 | 23.75 | 25.37 | YER103W | 99.0 | DAVVTPPAYFNDSQR      |                       |              |  | 0.000634888  | 1680.811523 | 841.413  | 1680.810791 | 841.4126587 | 2 | 9  | 38.4789 |
| 344 | 8.29 | 23.75 | 25.37 | YER103W | 99.0 | FEELCADLFR           | Carbamidomethyl(C)@5  |              |  | -0.000146864 | 1298.596436 | 650.3055 | 1298.596558 | 650.305542  | 2 | 12 | 44.5773 |
| 344 | 8.29 | 23.75 | 25.37 | YER103W | 99.0 | FEELCADLFR           | Carbamidomethyl(C)@5  |              |  | 0.000789876  | 1298.59729  | 650.3059 | 1298.596558 | 650.305542  | 2 | 10 | 45.0945 |
| 344 | 8.29 | 23.75 | 25.37 | YER103W | 99.0 | FEELCADLFR           | Carbamidomethyl(C)@5  |              |  | 0.00313268   | 1298.599731 | 650.3071 | 1298.596558 | 650.305542  | 2 | 9  | 45.6111 |
| 344 | 8.29 | 23.75 | 25.37 | YER103W | 99.0 | FEELCADLFR           | Carbamidomethyl(C)@5  |              |  | -0.00567985  | 1298.59082  | 650.3027 | 1298.596558 | 650.305542  | 2 | 7  | 46.1311 |
| 344 | 8.29 | 23.75 | 25.37 | YER103W | 99.0 | FELSGIPPAPR          |                       |              |  | 0.000688573  | 1182.640503 | 592.3275 | 1182.639648 | 592.3271484 | 2 | 12 | 36.157  |
| 344 | 8.29 | 23.75 | 25.37 | YER103W | 99.0 | FELSGIPPAPR          |                       |              |  | -0.00121403  | 1182.638428 | 592.3265 | 1182.639648 | 592.3271484 | 2 | 13 | 36.6688 |
| 344 | 8.29 | 23.75 | 25.37 | YER103W | 99.0 | FELSGIPPAPR          |                       |              |  | -0.000550269 | 1182.639038 | 592.3268 | 1182.639648 | 592.3271484 | 2 | 13 | 37.1847 |
| 344 | 8.29 | 23.75 | 25.37 | YER103W | 99.0 | FELSGIPPAPR          |                       |              |  | 0.00537776   | 1182.64502  | 592.3298 | 1182.639648 | 592.3271484 | 2 | 11 | 38.373  |
| 344 | 8.29 | 23.75 | 25.37 | YER103W | 99.0 | FELSGIPPAPR          |                       |              |  | -0.00123364  | 1182.638428 | 592.3265 | 1182.639648 | 592.3271484 | 2 | 12 | 37.6951 |
| 344 | 8.29 | 23.75 | 25.37 | YER103W | 99.0 | FELSGIPPAPR          |                       |              |  | 0.0092644    | 1182.649048 | 592.3318 | 1182.639648 | 592.3271484 | 2 | 11 | 38.8828 |
| 344 | 8.29 | 23.75 | 25.37 | YER103W | 99.0 | FELSGIPPAPR          |                       |              |  | 0.0053091    | 1182.64502  | 592.3298 | 1182.639648 | 592.3271484 | 2 | 10 | 39.4323 |
| 344 | 8.29 | 23.75 | 25.37 | YER103W | 99.0 | IINEPTAAAIAYGLDK     |                       |              |  | 0.00362917   | 1658.891724 | 830.4531 | 1658.887939 | 830.4512329 | 2 | 17 | 42.7626 |
| 344 | 8.29 | 23.75 | 25.37 | YER103W | 99.0 | IINEPTAAAIAYGLDK     |                       |              |  | -0.00338484  | 1658.884521 | 830.4495 | 1658.887939 | 830.4512329 | 2 | 8  | 43.2816 |
| 344 | 8.29 | 23.75 | 25.37 | YER103W | 98.7 | LVSDFFNGK            |                       |              |  | -0.00244152  | 1025.515625 | 513.7651 | 1025.518188 | 513.7663574 | 2 | 7  | 34.8015 |
| 344 | 8.29 | 23.75 | 25.37 | YER103W | 93.2 | VEIIANDQGNR          |                       |              |  | 0.0042355    | 1227.625122 | 614.8198 | 1227.620728 |             |   |    |         |



















|     |       |         |       |         |      |                    |                 |  |  |              |             |          |             |             |   |    |         |
|-----|-------|---------|-------|---------|------|--------------------|-----------------|--|--|--------------|-------------|----------|-------------|-------------|---|----|---------|
| 47  | 28.64 | 28.64   | 25.63 | YGL234W | 99.0 | LLGLAHITGGGLVENIPR |                 |  |  | 0.00025456   | 1942.136841 | 648.3862 | 1942.136353 | 648.3860474 | 3 | 11 | 49.2161 |
| 47  | 28.64 | 28.64   | 25.63 | YGL234W | 99.0 | MLNILVLNGGAR       | Deamidated(N)@9 |  |  | -0.00083863  | 1270.705933 | 636.3602 | 1270.706787 | 636.3606567 | 2 | 8  | 46.8603 |
| 47  | 28.64 | 28.64   | 25.63 | YGL234W | 99.0 | SAVTVVVAAGGYPESYAK |                 |  |  | -0.000100129 | 1767.904297 | 884.9594 | 1767.904297 | 884.9594116 | 2 | 14 | 36.8266 |
| 47  | 28.64 | 28.64   | 25.63 | YGL234W | 99.0 | TNQLVPEVLEYNVR     |                 |  |  | -0.00311587  | 1672.875244 | 837.4449 | 1672.878418 | 837.4464722 | 2 | 11 | 44.0299 |
| 47  | 28.64 | 28.64   | 25.63 | YGL234W | 99.0 | VDMSTWEVPR         |                 |  |  | -0.00857279  | 1218.561646 | 610.2881 | 1218.570313 | 610.2924194 | 2 | 10 | 35.897  |
| 47  | 28.64 | 28.64   | 25.63 | YGL234W | 99.0 | VINWDITPDVANFAR    |                 |  |  | -0.0018565   | 1729.876831 | 865.9457 | 1729.878784 | 865.9466553 | 2 | 11 | 50.4773 |
| 47  | 28.64 | 28.64   | 25.63 | YGL234W | 99.0 | VLSVTSTAQDLR       |                 |  |  | 0.00315556   | 1288.701904 | 645.3582 | 1288.69873  | 645.3566284 | 2 | 11 | 29.9973 |
| 47  | 28.64 | 28.64   | 25.63 | YGL234W | 99.0 | WFGQAGNVPHDDILR    |                 |  |  | 0.00104137   | 1723.843872 | 575.6219 | 1723.843018 | 575.6216431 | 3 | 10 | 37.4032 |
| 47  | 28.64 | 28.64   | 25.63 | YGL234W | 99.0 | YDSATDSLLTNGGR     |                 |  |  | -0.000823909 | 1468.678711 | 735.3466 | 1468.679443 | 735.3469849 | 2 | 11 | 27.758  |
| 47  | 28.64 | 28.64   | 25.63 | YGL234W | 98.7 | LAQSPTVGK          |                 |  |  | -0.00225219  | 899.5054932 | 450.76   | 899.5076294 | 450.7610779 | 2 | 6  | 9.1019  |
| 47  | 28.64 | 28.64   | 25.63 | YGL234W | 74.0 | TIDSQIVKPTIDGMR    | Deamidated(Q)@5 |  |  | 0.021306699  | 1673.887329 | 558.9697 | 1673.865845 | 558.9625244 | 3 | 7  | 32.1967 |
| 584 | 4     | 4       | 15.13 | YGL242C | 99.0 | NLIEVGADPR         |                 |  |  | -7.00E-05    | 1082.572021 | 542.2933 | 1082.572021 | 542.2932739 | 2 | 9  | 27.3964 |
| 584 | 4     | 4       | 15.13 | YGL242C | 99.0 | YGSWEVLDK          |                 |  |  | -0.000587048 | 1095.523071 | 548.7688 | 1095.523682 | 548.769104  | 2 | 9  | 34.1998 |
| 18  | 43.21 | 43.21   | 33.05 | YGL245W | 99.0 | ANFEIDLPAK         |                 |  |  | 0.000639883  | 1231.609131 | 616.8118 | 1231.608521 | 616.8115234 | 2 | 11 | 38.5618 |
| 18  | 43.21 | 43.21   | 33.05 | YGL245W | 99.0 | APIVAYAELIAAR      |                 |  |  | -6.23E-05    | 1356.776489 | 679.3955 | 1356.776489 | 679.3955688 | 2 | 12 | 49.076  |
| 18  | 43.21 | 43.21   | 33.05 | YGL245W | 99.0 | DGKPYVFFTIPDGK     |                 |  |  | -0.00233507  | 1582.800903 | 792.4077 | 1582.803101 | 792.4088745 | 2 | 11 | 43.8012 |
| 18  | 43.21 | 43.21   | 33.05 | YGL245W | 99.0 | HTAIVNPVK          |                 |  |  | -0.000642776 | 977.5652466 | 489.7899 | 977.5657959 | 489.7901917 | 2 | 8  | 13.7213 |
| 18  | 43.21 | 43.21   | 33.05 | YGL245W | 99.0 | IGDIIQFER          |                 |  |  | -0.00210149  | 1089.579834 | 545.7972 | 1089.581909 | 545.7982178 | 2 | 11 | 36.7485 |
| 18  | 43.21 | 43.21   | 33.05 | YGL245W | 99.0 | IHLEGSEAPQEPK      |                 |  |  | 5.49E-05     | 1433.715088 | 717.8648 | 1433.715088 | 717.8648071 | 2 | 9  | 18.7385 |
| 18  | 43.21 | 43.21   | 33.05 | YGL245W | 99.0 | IVNALAPNSIAIK      |                 |  |  | -0.000778619 | 1322.791504 | 662.403  | 1322.792236 | 662.4033813 | 2 | 10 | 35.1302 |
| 18  | 43.21 | 43.21   | 33.05 | YGL245W | 99.0 | LDDATEDVFNK        |                 |  |  | -0.00341446  | 1265.574219 | 633.7944 | 1265.577515 | 633.7960815 | 2 | 12 | 27.5954 |
| 18  | 43.21 | 43.21   | 33.05 | YGL245W | 99.0 | LNLEGDFK           |                 |  |  | 0.000535675  | 934.4765015 | 468.2455 | 934.4760132 | 468.2452698 | 2 | 9  | 31.2924 |
| 18  | 43.21 | 43.21</ |       |         |      |                    |                 |  |  |              |             |          |             |             |   |    |         |



|      |      |      |       |         |      |                          |    |                  |              |              |             |          |             |             |   |    |         |
|------|------|------|-------|---------|------|--------------------------|----|------------------|--------------|--------------|-------------|----------|-------------|-------------|---|----|---------|
| 73   | 24.7 | 24.7 | 15.91 | YGR094W | 99.0 | DINLDILR                 |    |                  |              | -0.00104119  | 970.5437012 | 486.2791 | 970.5447388 | 486.2796631 | 2 | 8  | 43.2142 |
| 73   | 24.7 | 24.7 | 15.91 | YGR094W | 99.0 | DSIVSLIK                 |    |                  |              | -0.0011952   | 873.5160522 | 437.7653 | 873.5171509 | 437.7658386 | 2 | 7  | 37.6831 |
| 73   | 24.7 | 24.7 | 15.91 | YGR094W | 99.0 | GHVDIDAEIAK              |    |                  |              | -0.000733473 | 1166.592529 | 584.3035 | 1166.59314  | 584.303833  | 2 | 16 | 22.3712 |
| 73   | 24.7 | 24.7 | 15.91 | YGR094W | 99.0 | LIATTRPETIFGDTAVAVHPDDDR |    |                  |              | 0.00410998   | 2722.396484 | 681.6064 | 2722.392578 | 681.6054077 | 4 | 9  | 41.832  |
| 73   | 24.7 | 24.7 | 15.91 | YGR094W | 99.0 | LNTAISNLEVENK            |    |                  |              | 0.00140463   | 1443.758301 | 722.8864 | 1443.756958 | 722.8857422 | 2 | 14 | 30.7345 |
| 73   | 24.7 | 24.7 | 15.91 | YGR094W | 99.0 | SLLSEYNILK               |    |                  |              | 0.00253813   | 1178.657227 | 590.3359 | 1178.654663 | 590.3345947 | 2 | 10 | 45.0454 |
| 73   | 24.7 | 24.7 | 15.91 | YGR094W | 99.0 | TGVFEPEFTADGK            |    |                  |              | 0.00097924   | 1396.6521   | 699.3333 | 1396.651001 | 699.3328247 | 2 | 14 | 34.768  |
| 73   | 24.7 | 24.7 | 15.91 | YGR094W | 99.0 | MILLGLK                  |    |                  |              | 0.000122134  | 786.5038452 | 394.2592 | 786.5037231 | 394.2591553 | 2 | 6  | 40.2183 |
| 73   | 24.7 | 24.7 | 15.91 | YGR094W | 98.7 | EAFTLSPELTK              |    |                  |              | -0.00595909  | 1234.638428 | 618.3265 | 1234.644531 | 618.3295288 | 2 | 9  | 36.8026 |
| 73   | 24.7 | 24.7 | 15.91 | YGR094W | 97.3 | KEVEPIPEFIDK             |    |                  | missed K-E@1 | 0.00254676   | 1442.768188 | 481.93   | 1442.765747 | 481.9291687 | 3 | 7  | 34.2713 |
| 73   | 24.7 | 24.7 | 15.91 | YGR094W | 96.0 | KEVEPIPEFIDK             |    |                  | missed K-E@1 | -0.00396237  | 1442.761719 | 722.3881 | 1442.765747 | 722.3901367 | 2 | 6  | 34.1971 |
| 73   | 24.7 | 24.7 | 15.91 | YGR094W | 94.4 | SVEEAFVR                 |    |                  |              | -0.00597141  | 935.465271  | 468.7399 | 935.4712524 | 468.7428894 | 2 | 7  | 25.0371 |
| 73   | 24.7 | 24.7 | 15.91 | YGR094W | 86.6 | SLGNVIDPLDVITGIK         |    |                  |              | 0.00106925   | 1652.936035 | 827.4753 | 1652.934937 | 827.4747314 | 2 | 5  | 58.3286 |
| 73   | 24.7 | 24.7 | 15.91 | YGR094W | 84.7 | NGIEQTINSK               |    | Deamidated(N)@1  |              | 0.028481901  | 1103.574219 | 552.7944 | 1103.545898 | 552.7802124 | 2 | 7  | 22.1313 |
| 73   | 24.7 | 24.7 | 15.91 | YGR094W | 74.4 | LLQGNLDPR                |    |                  |              | 0.000223384  | 1024.56665  | 513.2906 | 1024.566528 | 513.2905273 | 2 | 6  | 24.0053 |
| 1076 | 0.25 | 0.25 | 1.538 | YGR103W | 85.4 | LQVSLADFR                |    |                  |              | 0.000917101  | 1047.572266 | 524.7934 | 1047.571289 | 524.7929077 | 2 | 6  | 41.0235 |
| 1098 | 0.21 | 0.21 | 1.66  | YGR123C | 79.6 | MVNDLFLK                 |    |                  |              | 0.00406015   | 978.5249023 | 490.2697 | 978.520813  | 490.2677002 | 2 | 5  | 37.2635 |
| 436  | 6.06 | 20.1 | 19.79 | YGR124W | 99.0 | HEDIHNFKPK               |    |                  |              | 1.07E-05     | 1263.636108 | 422.2193 | 1263.635986 | 422.2192688 | 3 | 7  | 8.8232  |
| 436  | 6.06 | 20.1 | 19.79 | YGR124W | 99.0 | FDAWFPQK                 |    |                  |              | -4.00E-05    | 1037.49707  | 519.7558 | 1037.49707  | 519.7557983 | 2 | 9  | 37.6265 |
| 436  | 6.06 | 20.1 | 19.79 | YGR124W | 99.0 | IPSTPVDYHAIR             |    |                  |              | -0.00485258  | 1367.714722 | 456.9122 | 1367.719727 | 456.9138489 | 3 | 8  | 26.841  |
| 436  | 6.06 | 20.1 | 19.79 | YGR124W | 99.0 | ASTPMFLLSR               |    |                  |              | 2.76E-05     | 1121.590332 | 561.8024 | 1121.590332 | 561.8024292 | 2 | 8  | 41.2219 |
| 436  | 6.06 | 20.1 | 19.79 | YGR124W | 99.0 | LHSFAIGLPNAPDLQAAR       |    | Deamidated(N)@10 |              | 0.032181099  | 1891.027222 | 631.3497 | 1890.995239 | 631.3389893 | 3 | 8  | 42.3957 |
| 436  | 6.06 | 20.1 | 19.79 | YGR124W | 99.0 | NLHLADCLR                | </ |                  |              |              |             |          |             |             |   |    |         |



[illegible]

|    |       |       |       |         |      |                        |  |                       |              |              |             |          |             |             |   |    |         |
|----|-------|-------|-------|---------|------|------------------------|--|-----------------------|--------------|--------------|-------------|----------|-------------|-------------|---|----|---------|
| 34 | 33.54 | 33.54 | 61.63 | YGR192C | 97.7 | TASGNIIIPSTGAAK        |  |                       |              | 0.00976202   | 1373.724854 | 687.8697 | 1373.715088 | 687.8648071 | 2 | 7  | 23.2369 |
| 34 | 33.54 | 33.54 | 61.63 | YGR192C | 97.6 | LVSWYDNEYGYSTR         |  |                       |              | -0.00526309  | 1751.773926 | 876.8942 | 1751.779175 | 876.8968506 | 2 | 6  | 40.6421 |
| 34 | 33.54 | 33.54 | 61.63 | YGR192C | 97.5 | VVDLVEHVAK             |  |                       |              | -0.00221359  | 1107.626709 | 370.2162 | 1107.628784 | 370.2168884 | 3 | 8  | 24.8496 |
| 34 | 33.54 | 33.54 | 61.63 | YGR192C | 97.2 | VAINGFGR               |  | Deamidated(N)@4       |              | 0.000440087  | 833.4400635 | 417.7273 | 833.4395752 | 417.7270508 | 2 | 9  | 24.4482 |
| 34 | 33.54 | 33.54 | 61.63 | YGR192C | 97.0 | LTGMAFR                |  |                       |              | 0.000147311  | 794.4110718 | 398.2128 | 794.4108887 | 398.212738  | 2 | 8  | 26.1196 |
| 34 | 33.54 | 33.54 | 61.63 | YGR192C | 96.8 | ETTYDEIK               |  |                       |              | 6.65E-05     | 997.4604492 | 499.7375 | 997.4603882 | 499.7374878 | 2 | 7  | 17.7246 |
| 34 | 33.54 | 33.54 | 61.63 | YGR192C | 96.4 | LTGMAFR                |  |                       |              | 0.000574556  | 794.411499  | 398.213  | 794.4108887 | 398.212738  | 2 | 7  | 26.6416 |
| 34 | 33.54 | 33.54 | 61.63 | YGR192C | 96.3 | VVDLVEHVAK             |  |                       |              | 0.00285678   | 1107.631592 | 370.2178 | 1107.628784 | 370.2168884 | 3 | 8  | 23.8195 |
| 34 | 33.54 | 33.54 | 61.63 | YGR192C | 95.5 | VAINGFGR               |  | Deamidated(N)@4       |              | 0.00590164   | 833.4454956 | 417.73   | 833.4395752 | 417.7270508 | 2 | 7  | 26.7967 |
| 34 | 33.54 | 33.54 | 61.63 | YGR192C | 93.0 | VVDLVEHVAK             |  |                       |              | 0.000751068  | 1107.629517 | 370.2171 | 1107.628784 | 370.2168884 | 3 | 8  | 24.3332 |
| 34 | 33.54 | 33.54 | 61.63 | YGR192C | 87.3 | VAINGFGR               |  | Deamidated(N)@4       |              | -0.00193911  | 833.4376831 | 417.7261 | 833.4395752 | 417.7270508 | 2 | 8  | 27.6077 |
| 34 | 33.54 | 33.54 | 61.63 | YGR192C | 82.8 | ETTYDEIK               |  |                       |              | -0.000177666 | 997.4602661 | 499.7374 | 997.4603882 | 499.7374878 | 2 | 6  | 18.2336 |
| 34 | 33.54 | 33.54 | 61.63 | YGR192C | 81.7 | ETTYDEIKK              |  | Glu->pyro-Glu@N-term  | missed K-K@8 | -0.00134341  | 1107.543457 | 554.779  | 1107.5448   | 554.7796631 | 2 | 6  | 18.2147 |
| 34 | 33.54 | 33.54 | 61.63 | YGR192C | 80.9 | LTGMAFR                |  | Oxidation(M)@4        |              | -0.00291102  | 810.4028931 | 406.2087 | 810.4058228 | 406.2101746 | 2 | 7  | 25.8622 |
| 34 | 33.54 | 33.54 | 61.63 | YGR192C | 76.1 | ETTYDEIK               |  |                       |              | 0.000317962  | 997.4606934 | 499.7376 | 997.4603882 | 499.7374878 | 2 | 6  | 16.6983 |
| 34 | 33.54 | 33.54 | 61.63 | YGR192C | 75.6 | ETTYDEIK               |  |                       |              | 0.000432685  | 997.4608765 | 499.7377 | 997.4603882 | 499.7374878 | 2 | 7  | 17.2154 |
| 34 | 33.54 | 33.54 | 61.63 | YGR192C | 74.0 | LTGMAFR                |  |                       |              | 0.00158165   | 794.4124756 | 398.2135 | 794.4108887 | 398.212738  | 2 | 5  | 30.1893 |
| 34 | 33.54 | 33.54 | 61.63 | YGR192C | 73.5 | VLPELGK                |  |                       |              | -0.000290335 | 882.5172729 | 442.2659 | 882.5174561 | 442.2660217 | 2 | 6  | 26.2424 |
| 27 | 35.89 | 35.89 | 28.54 | YGR204W | 99.0 | AALEAGAFEAVTSNHWAEAGGK |  |                       |              | 0.000323669  | 2115.002441 | 706.0081 | 2115.002197 | 706.0079956 | 3 | 14 | 41.2312 |
| 27 | 35.89 | 35.89 | 28.54 | YGR204W | 99.0 | CVGDVEFNIAIK           |  | Carbamidomethyl(C)@1  |              | 0.00551754   | 1379.644653 | 690.8296 | 1379.63916  | 690.8268433 | 2 | 9  | 32.2156 |
| 27 | 35.89 | 35.89 | 28.54 | YGR204W | 99.0 | EQGFGNLPICIAK          |  | Carbamidomethyl(C)@10 |              | -0.008929    | 1445.724731 | 723.8696 | 1445.733643 | 723.8741455 | 2 | 10 | 42.3943 |
| 27 | 35.89 | 35.89 | 28.54 | YGR204W | 99.0 | FETDTEGEIAAIR          |  |                       |              | -0.000827755 | 1450.693237 | 726.3539 | 1450.69397  | 726.354248  | 2 | 14 | 32.8445 |











|      |      |      |       |         |      |                      |  |                                        |              |              |             |          |             |             |   |    |         |
|------|------|------|-------|---------|------|----------------------|--|----------------------------------------|--------------|--------------|-------------|----------|-------------|-------------|---|----|---------|
| 133  | 18   | 18   | 18.57 | YHR064C | 99.0 | GDFLIGVYEGDHHIEEK    |  |                                        |              | -0.001625    | 1956.920288 | 653.314  | 1956.921753 | 653.3145142 | 3 | 11 | 35.8726 |
| 133  | 18   | 18   | 18.57 | YHR064C | 99.0 | KPIGLIGAK            |  |                                        |              | 0.000251291  | 895.5856934 | 448.8001 | 895.5855103 | 448.8000183 | 2 | 12 | 18.6506 |
| 133  | 18   | 18   | 18.57 | YHR064C | 99.0 | LAAEDYIGSAVK         |  |                                        |              | -0.00037278  | 1235.639526 | 618.827  | 1235.639771 | 618.8271484 | 2 | 11 | 32.3953 |
| 133  | 18   | 18   | 18.57 | YHR064C | 99.0 | NDVDVIANPDGER        |  |                                        |              | -0.000182896 | 1412.653076 | 707.3338 | 1412.653198 | 707.3338623 | 2 | 11 | 24.1435 |
| 133  | 18   | 18   | 18.57 | YHR064C | 99.0 | SDAAVIAVR            |  |                                        |              | 0.000300481  | 900.5032959 | 451.2589 | 900.5028687 | 451.258728  | 2 | 9  | 20.5722 |
| 133  | 18   | 18   | 18.57 | YHR064C | 99.0 | YELVANK              |  |                                        |              | 5.13E-05     | 835.4440918 | 418.7293 | 835.4439697 | 418.729248  | 2 | 8  | 17.421  |
| 133  | 18   | 18   | 18.57 | YHR064C | 99.0 | LYTLGTK              |  |                                        |              | -0.00135101  | 794.4524536 | 398.2335 | 794.4537964 | 398.2341919 | 2 | 7  | 21.1012 |
| 137  | 17.7 | 17.7 | 32.64 | YHR068W | 99.0 | ATDLIEAMK            |  |                                        |              | 0.00238893   | 990.5080566 | 496.2613 | 990.5055542 | 496.2600708 | 2 | 10 | 30.9505 |
| 137  | 17.7 | 17.7 | 32.64 | YHR068W | 99.0 | GCFDEEGYQK           |  | Carbamidomethyl(C)@2                   |              | 0.0034461    | 1231.485107 | 616.7498 | 1231.481567 | 616.7480469 | 2 | 9  | 18.8567 |
| 137  | 17.7 | 17.7 | 32.64 | YHR068W | 99.0 | HGADCLEANQDVSPIWTPSK |  | Carbamidomethyl(C)@5; Deamidated(Q)@10 |              | 0.034248099  | 2340.067383 | 781.0297 | 2340.032959 | 781.0182495 | 3 | 15 | 34.0495 |
| 137  | 17.7 | 17.7 | 32.64 | YHR068W | 99.0 | IGNLLVPNDNYCK        |  | Carbamidomethyl(C)@12                  |              | -0.000927148 | 1518.749023 | 760.3818 | 1518.750122 | 760.3823242 | 2 | 9  | 33.8186 |
| 137  | 17.7 | 17.7 | 32.64 | YHR068W | 99.0 | LPELLQDAVLK          |  |                                        |              | -0.000209928 | 1237.728027 | 619.8713 | 1237.728149 | 619.8713989 | 2 | 14 | 46.2006 |
| 137  | 17.7 | 17.7 | 32.64 | YHR068W | 99.0 | VQGIDYSKPEATNMR      |  |                                        |              | -0.00822847  | 1707.81665  | 570.2795 | 1707.825073 | 570.2822876 | 3 | 11 | 23.2276 |
| 137  | 17.7 | 17.7 | 32.64 | YHR068W | 99.0 | AGMILGGGLIK          |  |                                        |              | -1.75E-06    | 1141.689331 | 571.8519 | 1141.689331 | 571.8519287 | 2 | 7  | 46.5871 |
| 137  | 17.7 | 17.7 | 32.64 | YHR068W | 99.0 | LPELLQDAVLK          |  |                                        |              | -0.00224822  | 1237.72583  | 619.8702 | 1237.728149 | 619.8713989 | 2 | 7  | 45.6898 |
| 137  | 17.7 | 17.7 | 32.64 | YHR068W | 98.4 | MLEEQDEYVK           |  | Deamidated(Q)@5                        |              | 0.0255176    | 1283.584717 | 642.7996 | 1283.559082 | 642.7868652 | 2 | 7  | 23.167  |
| 137  | 17.7 | 17.7 | 32.64 | YHR068W | 97.8 | EINDESSVLYWAHK       |  |                                        |              | -0.00318207  | 1689.796631 | 564.2728 | 1689.799805 | 564.2738647 | 3 | 8  | 36.6393 |
| 137  | 17.7 | 17.7 | 32.64 | YHR068W | 96.5 | HIIANACLMR           |  | Carbamidomethyl(C)@7                   |              | -0.00170845  | 1221.584106 | 408.202  | 1221.585938 | 408.2025757 | 3 | 7  | 12.0864 |
| 137  | 17.7 | 17.7 | 32.64 | YHR068W | 83.5 | HIIANACLMR           |  | Deamidated(N)@5; Carbamidomethyl(C)@7  |              | -0.034125701 | 1222.535767 | 408.5192 | 1222.569946 | 408.5305786 | 3 | 6  | 12.3794 |
| 1206 | 0.1  | 0.1  | 1.278 | YHR074W | 75.9 | LDLILNATK            |  | Deamidated(N)@6                        |              | 0.00473864   | 1000.585266 | 501.2999 | 1000.580444 | 501.2975159 | 2 | 6  | 36.4529 |
| 690  | 2.31 | 2.31 | 5.108 | YHR076W | 99.0 | FVDNVVLSLK           |  |                                        |              | 0.00795491   | 1106.605103 | 554.3098 | 1106.597168 | 554.3058472 | 2 | 7  | 30.8451 |
| 690  | 2.31 | 2.31 | 5.108 | YHR076W | 88.3 | DRDDLIYQK            |  |                                        | missed R-D@2 | -0.00285094  | 1164.574707 | 583.2946 | 1164.577515 | 583.2960205 | 2 | 5  | 18.6858 |
| 583  | 4    |      |       |         |      |                      |  |                                        |              |              |             |          |             |             |   |    |         |











































|     |      |      |       |         |      |                       |                  |               |  |              |             |          |             |             |   |    |         |
|-----|------|------|-------|---------|------|-----------------------|------------------|---------------|--|--------------|-------------|----------|-------------|-------------|---|----|---------|
| 308 | 9.26 | 9.26 | 14.01 | YKL212W | 99.0 | GSVPYIYWAEINNLK       |                  |               |  | 0.00484185   | 1602.845459 | 802.43   | 1602.840576 | 802.4275513 | 2 | 8  | 49.3848 |
| 308 | 9.26 | 9.26 | 14.01 | YKL212W | 99.0 | LGAFNDFLNSASR         |                  |               |  | -0.0019944   | 1410.687256 | 706.3509 | 1410.689209 | 706.3518677 | 2 | 11 | 43.2332 |
| 308 | 9.26 | 9.26 | 14.01 | YKL212W | 99.0 | YKPNLVLGENSELDATK     |                  |               |  | 0.00073817   | 1760.931641 | 587.9845 | 1760.930908 | 587.9842529 | 3 | 9  | 32.4155 |
| 308 | 9.26 | 9.26 | 14.01 | YKL212W | 99.0 | GTNDAVIHLANQDQGV      | Deamidated(N)@3  |               |  | 0.016267801  | 1807.897461 | 603.6398 | 1807.881348 | 603.6343994 | 3 | 9  | 26.1628 |
| 308 | 9.26 | 9.26 | 14.01 | YKL212W | 98.6 | VIDSNGNTVEIVNEQHSVVR  | Deamidated(N)@7  |               |  | 0.0196303    | 2209.116943 | 737.3796 | 2209.097412 | 737.3731079 | 3 | 8  | 28.5153 |
| 308 | 9.26 | 9.26 | 14.01 | YKL212W | 95.4 | LLELHLK               |                  |               |  | 0.000491155  | 864.5438843 | 433.2792 | 864.5432739 | 433.2789307 | 2 | 6  | 30.6391 |
| 672 | 2.5  | 2.5  | 9.091 | YKL216W | 99.0 | GYTSIDQFR             |                  |               |  | 0.000525087  | 1085.514648 | 543.7646 | 1085.51416  | 543.7643433 | 2 | 8  | 29.0827 |
| 672 | 2.5  | 2.5  | 9.091 | YKL216W | 98.5 | NGFGGIGGEYVKPTALANVR  | Deamidated(N)@1  |               |  | 0.000245499  | 2020.037964 | 674.3533 | 2020.037842 | 674.3532104 | 3 | 9  | 41.8785 |
| 153 | 16.1 | 16.1 | 16.98 | YKR001C | 99.0 | EAISNQFIQFLK          |                  |               |  | -0.000439777 | 1436.766113 | 719.3903 | 1436.766357 | 719.3904419 | 2 | 10 | 50.439  |
| 153 | 16.1 | 16.1 | 16.98 | YKR001C | 99.0 | ELSSQELSSGGAR         |                  |               |  | -0.00106715  | 1232.598633 | 617.3066 | 1232.599731 | 617.3071289 | 2 | 10 | 18.7169 |
| 153 | 16.1 | 16.1 | 16.98 | YKR001C | 99.0 | ENDITIQR              |                  |               |  | -0.000375996 | 987.4980469 | 494.7563 | 987.4985352 | 494.7565308 | 2 | 7  | 16.7968 |
| 153 | 16.1 | 16.1 | 16.98 | YKR001C | 99.0 | HQNEGQSEDNKEEWGEFLHLP | Deamidated(N)@10 | missed K-E@11 |  | 0.039473101  | 2708.249756 | 678.0697 | 2708.210205 | 678.0598755 | 4 | 8  | 39.1187 |
| 153 | 16.1 | 16.1 | 16.98 | YKR001C | 99.0 | SGFFGGFFSTK           |                  |               |  | -0.000309515 | 1180.555054 | 591.2848 | 1180.555298 | 591.2849121 | 2 | 7  | 49.8454 |
| 153 | 16.1 | 16.1 | 16.98 | YKR001C | 99.0 | VPVGQDPPDIER          |                  |               |  | 0.0172181    | 1320.684448 | 661.3495 | 1320.667358 | 661.3409424 | 2 | 8  | 23.6793 |
| 153 | 16.1 | 16.1 | 16.98 | YKR001C | 96.7 | VTGANSIGSSVPINLR      | Deamidated(N)@5  |               |  | 0.0175159    | 1584.864624 | 793.4396 | 1584.847168 | 793.4308472 | 2 | 6  | 34.8084 |
| 153 | 16.1 | 16.1 | 16.98 | YKR001C | 91.1 | ENDITIQR              |                  |               |  | -0.0328766   | 987.4656982 | 494.7401 | 987.4985352 | 494.7565308 | 2 | 6  | 17.0145 |
| 153 | 16.1 | 16.1 | 16.98 | YKR001C | 89.9 | MVEILR                |                  |               |  | -0.00198755  | 759.4292603 | 380.7219 | 759.4312744 | 380.7229309 | 2 | 6  | 27.5245 |
| 153 | 16.1 | 16.1 | 16.98 | YKR001C | 86.7 | QDIEELTK              |                  |               |  | -0.0470949   | 974.4448853 | 488.2297 | 974.4920654 | 488.2532959 | 2 | 7  | 21.4637 |
| 153 | 16.1 | 16.1 | 16.98 | YKR001C | 86.4 | LVTLVFDELVR           |                  |               |  | 0.00370401   | 1302.758423 | 652.3865 | 1302.754761 | 652.3846436 | 2 | 5  | 53.077  |
| 628 | 3.36 | 3.36 | 10.63 | YKR014C | 99.0 | FEIWDTAGQER           |                  |               |  | -0.00384883  | 1350.616699 | 676.3156 | 1350.620483 | 676.3175049 | 2 | 8  | 37.2514 |
| 628 | 3.36 | 3.36 | 10.63 | YKR014C | 99.0 | QYAEQEGLLFR           |                  |               |  | -0.00363017  | 1351.684814 | 676.8497 | 1351.688477 | 676.8515015 | 2 | 8  | 35.6761 |
| 993 | 0.65 | 0.65 | 2.045 | YKR016W | 96.1 | LLSNLLSTFNK           |                  |               |  | 0.0043334    | 1248.712036 | 625.3633 | 1248.707764 | 625.361145  | 2 | 5  | 47.4815 |
| 69  |      |      |       |         |      |                       |                  |               |  |              |             |          |             |             |   |    |         |



|     |      |       |       |         |      |                             |                 |  |  |              |             |          |             |             |   |    |         |
|-----|------|-------|-------|---------|------|-----------------------------|-----------------|--|--|--------------|-------------|----------|-------------|-------------|---|----|---------|
| 240 | 11.4 | 48.38 | 51.49 | YLL024C | 99.0 | FELSGIPPAPR                 |                 |  |  | -0.00121403  | 1182.638428 | 592.3265 | 1182.639648 | 592.3271484 | 2 | 13 | 36.6688 |
| 240 | 11.4 | 48.38 | 51.49 | YLL024C | 99.0 | FELSGIPPAPR                 |                 |  |  | -0.000550269 | 1182.639038 | 592.3268 | 1182.639648 | 592.3271484 | 2 | 13 | 37.1847 |
| 240 | 11.4 | 48.38 | 51.49 | YLL024C | 99.0 | FELSGIPPAPR                 |                 |  |  | 0.00537776   | 1182.64502  | 592.3298 | 1182.639648 | 592.3271484 | 2 | 11 | 38.373  |
| 240 | 11.4 | 48.38 | 51.49 | YLL024C | 99.0 | FELSGIPPAPR                 |                 |  |  | -0.00123364  | 1182.638428 | 592.3265 | 1182.639648 | 592.3271484 | 2 | 12 | 37.6951 |
| 240 | 11.4 | 48.38 | 51.49 | YLL024C | 99.0 | FELSGIPPAPR                 |                 |  |  | 0.0092644    | 1182.649048 | 592.3318 | 1182.639648 | 592.3271484 | 2 | 11 | 38.8828 |
| 240 | 11.4 | 48.38 | 51.49 | YLL024C | 99.0 | FELSGIPPAPR                 |                 |  |  | 0.0053091    | 1182.64502  | 592.3298 | 1182.639648 | 592.3271484 | 2 | 10 | 39.4323 |
| 240 | 11.4 | 48.38 | 51.49 | YLL024C | 99.0 | IINEPTAAAIYGLDK             |                 |  |  | 0.00362917   | 1658.891724 | 830.4531 | 1658.887939 | 830.4512329 | 2 | 17 | 42.7626 |
| 240 | 11.4 | 48.38 | 51.49 | YLL024C | 99.0 | IINEPTAAAIYGLDK             |                 |  |  | -0.00338484  | 1658.884521 | 830.4495 | 1658.887939 | 830.4512329 | 2 | 8  | 43.2816 |
| 240 | 11.4 | 48.38 | 51.49 | YLL024C | 99.0 | LIDVDGKPKIQVEFK             |                 |  |  | 0.00053159   | 1727.946289 | 864.9804 | 1727.945801 | 864.9801636 | 2 | 9  | 36.9375 |
| 240 | 11.4 | 48.38 | 51.49 | YLL024C | 99.0 | LIDVDGKPKIQVEFK             |                 |  |  | -0.000934369 | 1727.944824 | 576.9889 | 1727.945801 | 576.9891968 | 3 | 12 | 36.8617 |
| 240 | 11.4 | 48.38 | 51.49 | YLL024C | 99.0 | LIDVDGKPKIQVEFK             |                 |  |  | 0.00168105   | 1727.94751  | 864.981  | 1727.945801 | 864.9801636 | 2 | 9  | 36.427  |
| 240 | 11.4 | 48.38 | 51.49 | YLL024C | 99.0 | LVNHFIQEFK                  |                 |  |  | 0.00409522   | 1273.686035 | 637.8503 | 1273.681885 | 637.8482056 | 2 | 17 | 33.4867 |
| 240 | 11.4 | 48.38 | 51.49 | YLL024C | 99.0 | LVNHFIQEFK                  |                 |  |  | 0.00516935   | 1273.687134 | 637.8508 | 1273.681885 | 637.8482056 | 2 | 10 | 33.9911 |
| 240 | 11.4 | 48.38 | 51.49 | YLL024C | 99.0 | LVTDYFNGK                   | Deamidated(N)@7 |  |  | -0.000365715 | 1056.512451 | 529.2635 | 1056.512817 | 529.2636719 | 2 | 10 | 30.8506 |
| 240 | 11.4 | 48.38 | 51.49 | YLL024C | 99.0 | NFTPEQISSMVLGK              |                 |  |  | 0.00524995   | 1549.786255 | 775.9004 | 1549.781006 | 775.8977661 | 2 | 14 | 50.1681 |
| 240 | 11.4 | 48.38 | 51.49 | YLL024C | 99.0 | NFTPEQISSMVLGK              | Deamidated(N)@1 |  |  | 0.0196786    | 1550.784912 | 776.3997 | 1550.765015 | 776.3897705 | 2 | 12 | 49.5962 |
| 240 | 11.4 | 48.38 | 51.49 | YLL024C | 99.0 | NQAAMNPANTVFDAK             |                 |  |  | -0.0014309   | 1590.744629 | 796.3796 | 1590.746094 | 796.3803101 | 2 | 12 | 32.3631 |
| 240 | 11.4 | 48.38 | 51.49 | YLL024C | 99.0 | NQAAMNPANTVFDAK             | Oxidation(M)@5  |  |  | -0.00312002  | 1606.737915 | 804.3762 | 1606.740967 | 804.3777466 | 2 | 7  | 27.6142 |
| 240 | 11.4 | 48.38 | 51.49 | YLL024C | 99.0 | SINPDEAVAYGAAVQAAILTGEDESSK |                 |  |  | -0.00089773  | 2576.259277 | 1289.137 | 2576.260498 | 1289.137573 | 2 | 23 | 56.4183 |
| 240 | 11.4 | 48.38 | 51.49 | YLL024C | 99.0 | SINPDEAVAYGAAVQAAILTGEDESSK |                 |  |  | 0.0012853    | 2576.26123  | 1289.138 | 2576.260498 | 1289.137573 | 2 | 16 | 56.9292 |
| 240 | 11.4 | 48.38 | 51.49 | YLL024C | 99.0 | SQVDEIVLVGGSTR              |                 |  |  | -0.00304101  | 1458.764648 | 730.3896 | 1458.767822 | 730.3911743 | 2 | 19 | 34.6106 |
| 240 | 11.4 | 48.38 | 51.49 | YLL024C | 99.0 | SQVDEIVLVGGSTR              |                 |  |  | 0.000499029  | 1458.768311 | 730.3914 | 1458.767822 | 730.3911743 | 2 | 10 |         |











[illegible]













|     |       |       |       |         |      |                      |                      |  |  |              |             |          |             |             |   |    |         |
|-----|-------|-------|-------|---------|------|----------------------|----------------------|--|--|--------------|-------------|----------|-------------|-------------|---|----|---------|
| 557 | 4.07  | 14.57 | 47.43 | YLR448W | 98.9 | HLEDNTLLVTGPFK       |                      |  |  | 0.000432325  | 1582.836182 | 528.6193 | 1582.835449 | 528.6191406 | 3 | 13 | 40.0452 |
| 557 | 4.07  | 14.57 | 47.43 | YLR448W | 98.6 | ALLAEIK              |                      |  |  | 0.00059888   | 756.4750977 | 379.2448 | 756.4745483 | 379.2445374 | 2 | 7  | 27.4288 |
| 557 | 4.07  | 14.57 | 47.43 | YLR448W | 97.5 | ASLVPGTVLILLAGR      |                      |  |  | -0.000503364 | 1478.917847 | 740.4662 | 1478.918457 | 740.4664917 | 2 | 6  | 61.9798 |
| 557 | 4.07  | 14.57 | 47.43 | YLR448W | 94.1 | VNGVPLR              |                      |  |  | -0.000998394 | 753.4486694 | 377.7316 | 753.449707  | 377.7321472 | 2 | 7  | 16.8719 |
| 557 | 4.07  | 14.57 | 47.43 | YLR448W | 82.5 | ASLVPGTVLILLAGR      |                      |  |  | 0.000484471  | 1478.918823 | 740.4667 | 1478.918457 | 740.4664917 | 2 | 5  | 64.5127 |
| 683 | 2.41  | 2.41  | 13.64 | YML001W | 99.0 | VATMQVWDTAGQER       |                      |  |  | -0.001967    | 1590.744019 | 796.3793 | 1590.746094 | 796.3803101 | 2 | 11 | 32.8716 |
| 683 | 2.41  | 2.41  | 13.64 | YML001W | 87.7 | SLGDIPLFLTSAK        |                      |  |  | -0.000700947 | 1360.759521 | 681.387  | 1360.760254 | 681.3873901 | 2 | 5  | 51.4177 |
| 799 | 2     | 2     | 3.548 | YML004C | 99.0 | TCEELESQGVK          | Carbamidomethyl(C)@2 |  |  | 0.0087249    | 1278.584839 | 640.2997 | 1278.576172 | 640.2953491 | 2 | 7  | 15.5912 |
| 159 | 15.77 | 15.77 | 26.23 | YML008C | 99.0 | IAYEIELGDGIPK        |                      |  |  | 0.000731503  | 1416.750854 | 709.3827 | 1416.75     | 709.3823242 | 2 | 13 | 41.6817 |
| 159 | 15.77 | 15.77 | 26.23 | YML008C | 99.0 | LEGVYSEIYK           |                      |  |  | 0.000431075  | 1199.60791  | 600.8112 | 1199.607422 | 600.8109741 | 2 | 12 | 32.4979 |
| 159 | 15.77 | 15.77 | 26.23 | YML008C | 99.0 | LGLAPEGSK            |                      |  |  | -0.00284984  | 870.4782715 | 436.2464 | 870.4810791 | 436.2478027 | 2 | 10 | 17.4949 |
| 159 | 15.77 | 15.77 | 26.23 | YML008C | 99.0 | QFTTAMVTMEK          |                      |  |  | -0.00817271  | 1384.664917 | 693.3397 | 1384.673096 | 693.343811  | 2 | 10 | 39.1335 |
| 159 | 15.77 | 15.77 | 26.23 | YML008C | 99.0 | TGLSALMSK            |                      |  |  | 0.00253953   | 906.4870605 | 454.2508 | 906.484436  | 454.2495117 | 2 | 11 | 30.5694 |
| 159 | 15.77 | 15.77 | 26.23 | YML008C | 99.0 | VYAIEATCHAPK         | Carbamidomethyl(C)@8 |  |  | -0.00244679  | 1358.662842 | 680.3387 | 1358.665283 | 680.3399048 | 2 | 7  | 20.4498 |
| 159 | 15.77 | 15.77 | 26.23 | YML008C | 99.0 | YVQNLANLATFFR        |                      |  |  | 0.00269721   | 1555.817505 | 778.916  | 1555.814697 | 778.9146118 | 2 | 12 | 55.0746 |
| 159 | 15.77 | 15.77 | 26.23 | YML008C | 98.8 | EVTAALENAAVLVAGGK    |                      |  |  | 0.00145908   | 1668.90332  | 835.4589 | 1668.904663 | 835.4595947 | 2 | 7  | 47.5781 |
| 427 | 6.3   | 6.3   | 4.377 | YML010W | 99.0 | APPQLFNPTMALR        |                      |  |  | -0.00622999  | 1454.764038 | 728.3893 | 1454.770386 | 728.3924561 | 2 | 7  | 44.8283 |
| 427 | 6.3   | 6.3   | 4.377 | YML010W | 99.0 | EGFITHGDDDEDEASAPGAR |                      |  |  | -0.00750377  | 2087.859375 | 696.9604 | 2087.866699 | 696.9628906 | 3 | 6  | 22.2571 |
| 427 | 6.3   | 6.3   | 4.377 | YML010W | 99.0 | SDDVALEEGSYVR        |                      |  |  | -0.0127951   | 1438.644897 | 720.3297 | 1438.657593 | 720.3360596 | 2 | 9  | 28.5046 |
| 637 | 3.21  | 3.21  | 9.406 | YML012W | 99.0 | AIELDIESGAEAR        |                      |  |  | 0.00137281   | 1372.684814 | 687.3497 | 1372.683472 | 687.348999  | 2 | 12 | 33.3511 |
| 637 | 3.21  | 3.21  | 9.406 | YML012W | 98.6 | LNLFVR               |                      |  |  | -0.000281334 | 760.4592896 | 381.2369 | 760.4595337 | 381.2370605 | 2 | 6  | 35.0308 |
| 637 | 3.21  | 3.21  | 9.406 | YML012W | 92.8 | LNLFVR               |                      |  |  | 0.023295799  | 760.4828491 | 381.2487 | 760.4595337 | 381.2370605 | 2 | 6  | 35.3932 |
| 623 | 3.43  | 3.43  | 12.64 |         |      |                      |                      |  |  |              |             |          |             |             |   |    |         |

[illegible]



























































[illegible]



|     |       |       |                   |                             |                                                                    |              |             |          |             |             |   |    |         |
|-----|-------|-------|-------------------|-----------------------------|--------------------------------------------------------------------|--------------|-------------|----------|-------------|-------------|---|----|---------|
| 615 | 3.49  | 3.49  | 9.249 YPR028W     | 99.0 IVAPLTDR               |                                                                    | -0.00115563  | 883.5116577 | 442.7631 | 883.5126953 | 442.7636414 | 2 | 8  | 22.264  |
| 615 | 3.49  | 3.49  | 9.249 YPR028W     | 99.0 ILQQLLENK              |                                                                    | -0.000844139 | 984.5594482 | 493.287  | 984.5604248 | 493.2874756 | 2 | 8  | 20.7237 |
| 208 | 12.88 | 12.88 | 16.45 YPR033C     | 99.0 EAFSTLSGLFK            |                                                                    | 9.83E-05     | 1311.70752  | 656.861  | 1311.707397 | 656.8610229 | 2 | 8  | 57.2862 |
| 208 | 12.88 | 12.88 | 16.45 YPR033C     | 99.0 HGGVTIDTPVFELR         |                                                                    | 0.00296333   | 1539.807495 | 514.2764 | 1539.804565 | 514.2754517 | 3 | 14 | 40.5281 |
| 208 | 12.88 | 12.88 | 16.45 YPR033C     | 99.0 LIYNLEDQGGELCSLR       | Carbamidomethyl(C)@13                                              | -0.0102238   | 1878.904419 | 940.4595 | 1878.914551 | 940.4645386 | 2 | 11 | 42.1224 |
| 208 | 12.88 | 12.88 | 16.45 YPR033C     | 99.0 YDNLVNMFSEASGK         |                                                                    | 0.000358912  | 1573.708618 | 787.8616 | 1573.708252 | 787.8613892 | 2 | 10 | 45.6722 |
| 208 | 12.88 | 12.88 | 16.45 YPR033C     | 99.0 YVAMNNIQSIK            |                                                                    | -0.00118812  | 1279.658325 | 640.8364 | 1279.659424 | 640.8369751 | 2 | 9  | 29.5741 |
| 208 | 12.88 | 12.88 | 16.45 YPR033C     | 98.2 LSQIHEDGLNEVTR         |                                                                    | -0.00225396  | 1609.803711 | 537.6085 | 1609.80603  | 537.6092529 | 3 | 10 | 24.8335 |
| 208 | 12.88 | 12.88 | 16.45 YPR033C     | 97.8 DWTGYLPER              |                                                                    | 0.000424703  | 1135.530273 | 568.7724 | 1135.529785 | 568.7722168 | 2 | 7  | 37.6643 |
| 185 | 14.31 | 14.31 | 22.87 YPR035W     | 99.0 DMIEAHYR               |                                                                    | -0.000636313 | 1033.464478 | 517.7395 | 1033.465088 | 517.7398071 | 2 | 9  | 19.0047 |
| 185 | 14.31 | 14.31 | 22.87 YPR035W     | 99.0 GDNIVVLAACYNNDGTPNK    | Carbamidomethyl(C)@10                                              | -0.000880919 | 2033.94751  | 1017.981 | 2033.947632 | 1017.981079 | 2 | 6  | 36.8848 |
| 185 | 14.31 | 14.31 | 22.87 YPR035W     | 99.0 GGYPAPQGPYYCGVGAGK     | Carbamidomethyl(C)@12                                              | -0.000153284 | 1797.814331 | 899.9144 | 1797.814453 | 899.9144897 | 2 | 14 | 29.8613 |
| 185 | 14.31 | 14.31 | 22.87 YPR035W     | 99.0 LYGSDNDMR              |                                                                    | -0.000473047 | 1069.449463 | 535.732  | 1069.449829 | 535.7321777 | 2 | 9  | 14.9799 |
| 185 | 14.31 | 14.31 | 22.87 YPR035W     | 99.0 VAEFEGIK               |                                                                    | -0.000207373 | 891.4700928 | 446.7423 | 891.4701538 | 446.7423706 | 2 | 9  | 25.4634 |
| 185 | 14.31 | 14.31 | 22.87 YPR035W     | 98.8 YIEQAIK                |                                                                    | -0.000359421 | 992.5174561 | 497.266  | 992.5178833 | 497.2662048 | 2 | 9  | 19.0853 |
| 185 | 14.31 | 14.31 | 22.87 YPR035W     | 97.7 YLELDQR                |                                                                    | 0.000280732  | 935.4714966 | 468.743  | 935.4712524 | 468.7428894 | 2 | 8  | 23.4    |
| 185 | 14.31 | 14.31 | 22.87 YPR035W     | 92.5 ISFHPK                 | cleaved K-P@C-term                                                 | -0.000205895 | 727.4014893 | 364.708  | 727.4017334 | 364.7081299 | 2 | 6  | 12.6444 |
| 472 | 5.49  | 5.49  | 10.28 YPR036W     | 99.0 NIGDGLSSSSNNAHSGFK     |                                                                    | 0.0113358    | 1703.797607 | 568.9398 | 1703.786377 | 568.9360352 | 3 | 9  | 21.771  |
| 472 | 5.49  | 5.49  | 10.28 YPR036W     | 99.0 SEELSEIDASTAK          |                                                                    | -0.00173508  | 1378.644653 | 690.3296 | 1378.646362 | 690.3304443 | 2 | 8  | 24.2093 |
| 472 | 5.49  | 5.49  | 10.28 YPR036W     | 95.3 YSDEELR                |                                                                    | 0.00173236   | 910.4048462 | 456.2097 | 910.4031982 | 456.2088928 | 2 | 6  | 13.7971 |
| 472 | 5.49  | 5.49  | 10.28 YPR036W     | 87.8 QLEQLFDVSLK            |                                                                    | -0.00840831  | 1318.704834 | 660.3597 | 1318.713257 | 660.3638916 | 2 | 6  | 46.6268 |
| 210 | 12.66 | 12.66 | 20.1 YPR041W      | 99.0 AAASTLEDIEVK           |                                                                    | 0.00264708   | 1245.647827 | 623.8312 | 1245.645264 | 623.829895  | 2 | 13 | 30.3206 |
| 210 | 12.66 | 12.66 | 20.1 YPR041W      | 99.0 DDEWAVDMSEAIR          |                                                                    | -0.00143215  | 1664.69751  | 833.356  | 1664.698853 | 833.3566895 | 2 | 9  | 44.1367 |
| 210 | 12.66 | 12.66 | 20.1 YPR041W      | 99.0 GGGLSISDIAQGK          |                                                                    | 0.00076151   | 1201.631104 | 601.8228 | 1201.630249 | 601.8223877 | 2 | 12 | 33.736  |
| 210 | 12.66 | 12.66 | 20.1 YPR041W      | 99.0 YLVNGVHEPAK            |                                                                    | -0.000765029 | 1225.644897 | 613.8297 | 1225.645508 | 613.8300171 | 2 | 7  | 19.6848 |
| 210 | 12.66 | 12.66 | 20.1 YPR041W      | 98.4 NPETEIITK              |                                                                    | 0.0111398    | 1156.64502  | 579.3298 | 1156.633911 | 579.3242798 | 2 | 9  | 27.8118 |
| 210 | 12.66 | 12.66 | 20.1 YPR041W      | 98.3 NFMGGIER               |                                                                    | -0.00179456  | 922.4312744 | 462.2229 | 922.4331055 | 462.2238159 | 2 | 8  | 27.1764 |
| 210 | 12.66 | 12.66 | 20.1 YPR041W      | 98.1 ILVPEYEK               |                                                                    | -0.0019477   | 1090.589111 | 546.3018 | 1090.591064 | 546.3027954 | 2 | 8  | 25.9078 |
| 447 | 6     | 6     | 46.25 YPR043W; Y. | 99.0 GAAGIWTCSCK            | Carbamidomethyl(C)@8; Carbamidomethyl(C)@10; Carbamidomethyl(C)@11 | -0.0014659   | 1369.556274 | 685.7854 | 1369.557739 | 685.7861328 | 2 | 11 | 25.5362 |
| 447 | 6     | 6     | 46.25 YPR043W; Y. | 99.0 TVAGGAYTVSTAAATVR      |                                                                    | -0.000649338 | 1665.86792  | 833.9412 | 1665.868652 | 833.9415894 | 2 | 15 | 31.3504 |
| 447 | 6     | 6     | 46.25 YPR043W; Y. | 99.0 YDCSFCKG               | Carbamidomethyl(C)@3; Carbamidomethyl(C)@6                         | 0.000269895  | 1035.379272 | 518.6969 | 1035.379028 | 518.6967773 | 2 | 9  | 16.7266 |
| 447 | 6     | 6     | 46.25 YPR043W; Y. | 98.9 YDCSFCKG               | Carbamidomethyl(C)@3; Carbamidomethyl(C)@6                         | 0.028427601  | 1035.407471 | 518.711  | 1035.379028 | 518.6967773 | 2 | 8  | 17.0131 |
| 630 | 3.34  | 3.34  | 30.59 YPR052C     | 99.0 ALSAYMFFANENR          |                                                                    | 0.000245935  | 1532.708496 | 767.3615 | 1532.708252 | 767.3613892 | 2 | 8  | 47.2115 |
| 630 | 3.34  | 3.34  | 30.59 YPR052C     | 99.0 SENPDITFGQVGK          |                                                                    | -0.00797952  | 1390.664917 | 696.3397 | 1390.672852 | 696.343689  | 2 | 9  | 30.18   |
| 454 | 5.89  | 5.89  | 24.65 YPR062W     | 99.0 GHEVVVVDDER            |                                                                    | 0.000173931  | 1252.605103 | 627.3098 | 1252.604736 | 627.3096924 | 2 | 9  | 15.291  |
| 454 | 5.89  | 5.89  | 24.65 YPR062W     | 99.0 GMDIAYEEAALGYK         |                                                                    | -0.00115886  | 1529.706055 | 765.8603 | 1529.707153 | 765.8609009 | 2 | 7  | 40.8738 |
| 454 | 5.89  | 5.89  | 24.65 YPR062W     | 99.0 CVVGENVNFK             | Carbamidomethyl(C)@1                                               | 0.000694413  | 1164.560425 | 583.2875 | 1164.559692 | 583.2871704 | 2 | 8  | 26.3975 |
| 454 | 5.89  | 5.89  | 24.65 YPR062W     | 99.0 GHEVVVVDDER            |                                                                    | -0.0068417   | 1252.597778 | 418.5399 | 1252.604736 | 418.5422058 | 3 | 8  | 15.4419 |
| 350 | 8.2   | 8.2   | 20 YPR069C        | 99.0 THIGDGFQFLR            |                                                                    | -0.00352163  | 1289.648193 | 430.89   | 1289.651611 | 430.8911743 | 3 | 8  | 37.8169 |
| 350 | 8.2   | 8.2   | 20 YPR069C        | 99.0 VLVIGGGDGGVLR          |                                                                    | 0.000400177  | 1210.703857 | 606.3592 | 1210.703369 | 606.3589478 | 2 | 9  | 35.5038 |
| 350 | 8.2   | 8.2   | 20 YPR069C        | 99.0 EYFQLLSALTEK           |                                                                    | 0.00123434   | 1554.794312 | 778.4044 | 1554.792969 | 778.4037476 | 2 | 7  | 47.9628 |
| 350 | 8.2   | 8.2   | 20 YPR069C        | 99.0 THIGDGFQFLR            |                                                                    | -0.00230574  | 1289.649414 | 645.832  | 1289.651611 | 645.8331299 | 2 | 8  | 37.9008 |
| 350 | 8.2   | 8.2   | 20 YPR069C        | 98.1 IHEASFLPTWAAK          |                                                                    | 0.0022101    | 1568.837524 | 523.9531 | 1568.835083 | 523.9523315 | 3 | 7  | 42.1293 |
| 350 | 8.2   | 8.2   | 20 YPR069C        | 96.9 YQDVLIFK               |                                                                    | -0.000230015 | 1024.559082 | 513.2868 | 1024.559326 | 513.2869263 | 2 | 7  | 38.6755 |
| 731 | 2.03  | 2.03  | 12.99 YPR073C     | 99.0 HFDEYDYIIGMDESINNLIK   |                                                                    | 0.0040688    | 2429.088623 | 810.7035 | 2429.084473 | 810.7021484 | 3 | 8  | 46.8357 |
| 54  | 27.52 | 27.52 | 28.51 YPR074C     | 99.0 ANSGHPGAPLGMAPAHLWSQMR |                                                                    | 0.00274222   | 2455.202881 | 614.808  | 2455.200195 | 614.807312  | 4 | 10 | 42.0464 |
| 54  | 27.52 | 27.52 | 28.51 YPR074C     | 99.0 EALDFQPPSSSGSNYSGR     |                                                                    | -9.64E-05    | 1867.833618 | 934.9241 | 1867.833618 | 934.9241333 | 2 | 9  | 31.6348 |
| 54  | 27.52 | 27.52 | 28.51 YPR074C     | 99.0 FFGFTPEGVAER           |                                                                    | -0.00610332  | 1355.644897 | 678.8297 | 1355.651001 | 678.8327637 | 2 | 8  | 43.704  |
| 54  | 27.52 | 27.52 | 28.51 YPR074C     | 99.0 ILAVDTVSK              |                                                                    | 0.000277326  | 944.5544434 | 473.2845 | 944.5542603 | 473.2843933 | 2 | 9  | 22.867  |
| 54  | 27.52 | 27.52 | 28.51 YPR074C     | 99.0 KFPELGAELAR            | missed K-F@1                                                       | 0.000816188  | 1229.677612 | 410.8998 | 1229.67688  | 410.8995361 | 3 | 8  | 33.5608 |
| 54  | 27.52 | 27.52 | 28.51 YPR074C     | 99.0 LGNLIAIYDDNK           |                                                                    | -0.00212769  | 1347.701294 | 674.8579 | 1347.703491 | 674.8590088 | 2 | 13 | 40.3658 |
| 54  | 27.52 | 27.52 | 28.51 YPR074C     | 99.0 LPTYTAK                |                                                                    | -0.000268776 | 792.4378662 | 397.2262 | 792.4381714 | 397.2263489 | 2 | 7  | 16.0438 |
| 54  | 27.52 | 27.52 | 28.51 YPR074C     | 99.0 MNPTNPDWINR            |                                                                    | -0.00410901  | 1356.620239 | 679.3174 | 1356.624512 | 679.319519  | 2 | 9  | 29.9071 |

|    |       |       |       |             |      |                            |                                      |  |  |              |  |              |             |          |             |             |   |    |         |
|----|-------|-------|-------|-------------|------|----------------------------|--------------------------------------|--|--|--------------|--|--------------|-------------|----------|-------------|-------------|---|----|---------|
| 54 | 27.52 | 27.52 | 28.51 | YPR074C     | 99.0 | SFVVPQEVYDHYQK             |                                      |  |  |              |  | -0.00161408  | 1737.834717 | 580.2855 | 1737.836182 | 580.2860107 | 3 | 12 | 35.8578 |
| 54 | 27.52 | 27.52 | 28.51 | YPR074C     | 99.0 | VVSLPDFFTFDK               |                                      |  |  |              |  | 0.000318465  | 1413.718506 | 707.8665 | 1413.718018 | 707.866272  | 2 | 10 | 56.3747 |
| 54 | 27.52 | 27.52 | 28.51 | YPR074C     | 99.0 | YAHQSFIDR                  |                                      |  |  |              |  | -0.00151427  | 1192.560913 | 398.5276 | 1192.5625   | 398.5281067 | 3 | 9  | 19.7237 |
| 54 | 27.52 | 27.52 | 28.51 | YPR074C     | 99.0 | FFGFTPEGVAER               |                                      |  |  |              |  | -0.000991113 | 1355.650024 | 678.8323 | 1355.651001 | 678.8327637 | 2 | 8  | 43.1911 |
| 54 | 27.52 | 27.52 | 28.51 | YPR074C     | 99.0 | KFPELGAEIAR                |                                      |  |  | missed K-F@1 |  | 0.0029459    | 1229.679932 | 615.8472 | 1229.67688  | 615.8457031 | 2 | 8  | 33.5351 |
| 54 | 27.52 | 27.52 | 28.51 | YPR074C     | 98.7 | QNLPLQEGSSIESASK           |                                      |  |  |              |  | -0.00149992  | 1686.84082  | 844.4277 | 1686.842407 | 844.4285278 | 2 | 6  | 30.717  |
| 54 | 27.52 | 27.52 | 28.51 | YPR074C     | 97.7 | FGFNPDK                    |                                      |  |  |              |  | 0.000387326  | 823.3869019 | 412.7007 | 823.3864746 | 412.7005005 | 2 | 7  | 24.4131 |
| 54 | 27.52 | 27.52 | 28.51 | YPR074C     | 93.3 | MTTTIGYGS LHAGSHSVHGAPLK   |                                      |  |  |              |  | -0.00177068  | 2321.156982 | 581.2965 | 2321.158691 | 581.296936  | 4 | 10 | 26.071  |
| 54 | 27.52 | 27.52 | 28.51 | YPR074C     | 85.4 | SFVVPQEVYDHYQK             |                                      |  |  |              |  | -0.00413142  | 1737.832031 | 869.9233 | 1737.836182 | 869.925415  | 2 | 6  | 35.8698 |
| 54 | 27.52 | 27.52 | 28.51 | YPR074C     | 78.9 | LAVSTIR                    |                                      |  |  |              |  | -0.00112277  | 758.4638672 | 380.2392 | 758.4650269 | 380.2398071 | 2 | 7  | 20.1474 |
| 33 | 33.59 | 33.59 | 53.32 | YPR080W; YI | 99.0 | EHALLAFTLGVR               |                                      |  |  |              |  | 0.000866374  | 1325.746582 | 442.9228 | 1325.745605 | 442.9224548 | 3 | 12 | 43.488  |
| 33 | 33.59 | 33.59 | 53.32 | YPR080W; YI | 99.0 | FDELLEK                    |                                      |  |  |              |  | -0.000658573 | 892.4534912 | 447.234  | 892.4542236 | 447.234375  | 2 | 9  | 27.2236 |
| 33 | 33.59 | 33.59 | 53.32 | YPR080W; YI | 99.0 | FQEIVK                     |                                      |  |  |              |  | -0.000238005 | 762.4272461 | 382.2209 | 762.4276123 | 382.2210693 | 2 | 8  | 19.5433 |
| 33 | 33.59 | 33.59 | 53.32 | YPR080W; YI | 99.0 | FVPSKPMCVEAFSEYPPLGR       | Carbamidomethyl(C)@8                 |  |  |              |  | -0.00485112  | 2310.113037 | 771.0449 | 2310.117676 | 771.0465088 | 3 | 15 | 43.3315 |
| 33 | 33.59 | 33.59 | 53.32 | YPR080W; YI | 99.0 | IGGIGTVPVGR                |                                      |  |  |              |  | 0.00094721   | 1024.603882 | 513.3092 | 1024.602905 | 513.3087158 | 2 | 10 | 27.3375 |
| 33 | 33.59 | 33.59 | 53.32 | YPR080W; YI | 99.0 | LPLQDVYK                   |                                      |  |  |              |  | 0.00256965   | 974.5462646 | 488.2804 | 974.5437012 | 488.2791138 | 2 | 10 | 30.2255 |
| 33 | 33.59 | 33.59 | 53.32 | YPR080W; YI | 99.0 | QTVAVGVK                   |                                      |  |  |              |  | -0.00108575  | 913.5586548 | 457.7866 | 913.5596924 | 457.7871094 | 2 | 10 | 23.1777 |
| 33 | 33.59 | 33.59 | 53.32 | YPR080W; YI | 99.0 | SHINVVIGHVDSGK             |                                      |  |  |              |  | -0.00237785  | 1559.8396   | 520.9538 | 1559.842041 | 520.9545898 | 3 | 15 | 26.5118 |
| 33 | 33.59 | 33.59 | 53.32 | YPR080W; YI | 99.0 | STTTGHLIYK                 |                                      |  |  |              |  | 0.000463398  | 1119.592896 | 560.8037 | 1119.592407 | 560.8034668 | 2 | 10 | 15.5325 |
| 33 | 33.59 | 33.59 | 53.32 | YPR080W; YI | 99.0 | SVMHHHEQLEQGVPGDNVGFNVK    |                                      |  |  |              |  | 0.00540606   | 2549.202637 | 638.3079 | 2549.196777 | 638.3065186 | 4 | 16 | 30.5868 |
| 33 | 33.59 | 33.59 | 53.32 | YPR080W; YI | 99.0 | TVPFVPISGWNGDNMIEATTNAPWYK |                                      |  |  |              |  | -0.000622893 | 2907.389404 | 1454.702 | 2907.390137 | 1454.702393 | 2 | 10 | 59.9028 |
| 33 | 33.59 | 33.59 | 53.32 | YPR080W; YI | 99.0 | VETGVKPGMVVTFAPAGVTTVEK    |                                      |  |  |              |  | -0.0011171   | 2429.322998 | 810.7816 | 2429.323975 | 810.7819214 | 3 | 14 | 43.5379 |
| 33 | 33.59 | 33.59 | 53.32 | YPR080W; YI | 99.0 | YAWVLDK                    |                                      |  |  |              |  | -0.000901631 | 893.4638672 | 447.7392 | 893.4647217 | 447.739624  | 2 | 9  | 34.8149 |
| 33 | 33.59 | 33.59 | 53.32 | YPR080W; YI | 99.0 | YQVTVIDAPGHR               | Carbamyl@N-term                      |  |  |              |  | -0.00258582  | 1397.702637 | 699.8586 | 1397.7052   | 699.8598633 | 2 | 11 | 31.5283 |
| 33 | 33.59 | 33.59 | 53.32 | YPR080W; YI | 99.0 | EHALLAFTLGVR               |                                      |  |  |              |  | -0.000924044 | 1325.744629 | 663.8796 | 1325.745605 | 663.8800659 | 2 | 10 | 43.4258 |
| 33 | 33.59 | 33.59 | 53.32 | YPR080W; YI | 99.0 | FDELLEK                    |                                      |  |  |              |  | -0.000475468 | 892.4536743 | 447.2341 | 892.4542236 | 447.234375  | 2 | 8  | 27.7566 |
| 33 | 33.59 | 33.59 | 53.32 | YPR080W; YI | 99.0 | FVPSKPMCVEAFSEYPPLGR       | Carbamidomethyl(C)@8                 |  |  |              |  | -0.000228796 | 2310.117432 | 771.0464 | 2310.117676 | 771.0465088 | 3 | 14 | 42.8237 |
| 33 | 33.59 | 33.59 | 53.32 | YPR080W; YI | 99.0 | FVPSKPMCVEAFSEYPPLGR       | Oxidation(M)@7; Carbamidomethyl(C)@8 |  |  |              |  | -0.000196054 | 2326.112549 | 776.3781 | 2326.112549 | 776.3781738 | 3 | 13 | 39.1729 |
| 33 | 33.59 | 33.59 | 53.32 | YPR080W; YI | 99.0 | FVPSKPMCVEAFSEYPPLGR       | Carbamidomethyl(C)@8                 |  |  |              |  | 0.00652303   | 2310.123291 | 1156.069 | 2310.117676 | 1156.066162 | 2 | 8  | 43.4203 |
| 33 | 33.59 | 33.59 | 53.32 | YPR080W; YI | 99.0 | IGGIGTVPVGR                |                                      |  |  |              |  | -0.000259393 | 1024.602661 | 513.3086 | 1024.602905 | 513.3087158 | 2 | 10 | 29.7358 |
| 33 | 33.59 | 33.59 | 53.32 | YPR080W; YI | 99.0 | IGGIGTVPVGR                |                                      |  |  |              |  | -0.000297547 | 1024.602661 | 513.3086 | 1024.602905 | 513.3087158 | 2 | 11 | 28.4451 |
| 33 | 33.59 | 33.59 | 53.32 | YPR080W; YI | 99.0 | IGGIGTVPVGR                |                                      |  |  |              |  | 0.00104523   | 1024.604126 | 513.3093 | 1024.602905 | 513.3087158 | 2 | 12 | 27.8484 |
| 33 | 33.59 | 33.59 | 53.32 | YPR080W; YI | 99.0 | IGGIGTVPVGR                | Carbamyl@N-term                      |  |  |              |  | 0.0014116    | 1067.610229 | 534.8124 | 1067.608765 | 534.8116455 | 2 | 8  | 38.8358 |
| 33 | 33.59 | 33.59 | 53.32 | YPR080W; YI | 99.0 | LPLQDVYK                   |                                      |  |  |              |  | -0.000176928 | 974.543457  | 488.279  | 974.5437012 | 488.2791138 | 2 | 8  | 29.7143 |
| 33 | 33.59 | 33.59 | 53.32 | YPR080W; YI | 99.0 | LPLQDVYK                   |                                      |  |  |              |  | 0.000616528  | 974.5442505 | 488.2794 | 974.5437012 | 488.2791138 | 2 | 9  | 30.7331 |
| 33 | 33.59 | 33.59 | 53.32 | YPR080W; YI | 99.0 | LPLQDVYK                   |                                      |  |  |              |  | 0.000591065  | 974.5442505 | 488.2794 | 974.5437012 | 488.2791138 | 2 | 8  | 31.2398 |
| 33 | 33.59 | 33.59 | 53.32 | YPR080W; YI | 99.0 | QTVAVGVK                   |                                      |  |  |              |  | 0.00190497   | 913.5616455 | 457.7881 | 913.5596924 | 457.7871094 | 2 | 10 | 23.6899 |
| 33 | 33.59 | 33.59 | 53.32 | YPR080W; YI | 99.0 | SHINVVIGHVDSGK             |                                      |  |  |              |  | -0.000913012 | 1559.841064 | 520.9543 | 1559.842041 | 520.9545898 | 3 | 18 | 25.3351 |
| 33 | 33.59 | 33.59 | 53.32 | YPR080W; YI | 99.0 | SHINVVIGHVDSGK             |                                      |  |  |              |  | -0.00258023  | 1559.839233 | 520.9537 | 1559.842041 | 520.9545898 | 3 | 16 | 25.842  |
| 33 | 33.59 | 33.59 | 53.32 | YPR080W; YI | 99.0 | STTTGHLIYK                 |                                      |  |  |              |  | -0.000757303 | 1119.591675 | 560.8031 | 1119.592407 | 560.8034668 | 2 | 11 | 15.029  |
| 33 | 33.59 | 33.59 | 53.32 | YPR080W; YI | 99.0 | SVMHHHEQLEQGVPGDNVGFNVK    |                                      |  |  |              |  | -0.000583458 | 2549.196289 | 850.7394 | 2549.196777 | 850.739563  | 3 | 19 | 31.1074 |
| 33 | 33.59 | 33.59 | 53.32 | YPR080W; YI | 99.0 | SVMHHHEQLEQGVPGDNVGFNVK    |                                      |  |  |              |  | 0.00124124   | 2549.198242 | 638.3068 | 2549.196777 | 638.3065186 | 4 | 18 | 31.1087 |
| 33 | 33.59 | 33.59 | 53.32 | YPR080W; YI | 99.0 | SVMHHHEQLEQGVPGDNVGFNVK    | Oxidation(M)@4                       |  |  |              |  | -0.000522135 | 2565.191406 | 642.3051 | 2565.191895 | 642.3052368 | 4 | 13 | 29.3417 |
| 33 | 33.59 | 33.59 | 53.32 | YPR080W; YI | 99.0 | SVMHHHEQLEQGVPGDNVGFNVK    |                                      |  |  |              |  | -0.00339743  | 2549.193848 | 638.3057 | 2549.196777 | 638.3065186 | 4 | 13 | 31.62   |
| 33 | 33.59 | 33.59 | 53.32 | YPR080W; YI | 99.0 | SVMHHHEQLEQGVPGDNVGFNVK    |                                      |  |  |              |  | 0.00219283   | 2549.198975 | 850.7403 | 2549.196777 | 850.739563  | 3 | 10 | 30.5855 |
| 33 | 33.59 | 33.59 | 53.32 | YPR080W; YI | 99.0 | TVPFVPISGWNGDNMIEATTNAPWYK |                                      |  |  |              |  | 0.00108609   | 2907.391357 | 1454.703 | 2907.390137 | 1454.702393 | 2 | 9  | 59.3975 |
| 33 | 33.59 | 33.59 | 53.32 | YPR080W; YI | 99.0 | VETGVKPGMVVTFAPAGVTTVEK    |                                      |  |  |              |  | 0.00168711   | 2429.325684 | 810.7825 | 2429.323975 | 810.7819214 | 3 | 21 | 44.0583 |
| 33 | 33.59 | 33.59 | 53.32 | YPR080W; YI | 99.0 | YAWVLDK                    |                                      |  |  |              |  | -0.00113836  | 893.463501  | 447.739  | 893.4647217 | 447.739624  | 2 | 7  | 36.4071 |
| 33 | 33.59 | 33.59 | 53.32 | YPR080W; YI | 99.0 | YQVTVIDAPGHR               |                                      |  |  |              |  | -0.00117166  | 1354.69812  | 452.5733 | 1354.699341 | 452.5737305 | 3 | 13 | 24.9501 |
| 33 | 33.59 | 33.59 | 53.32 | YPR080W; YI | 99.0 | YQVTVIDAPGHR               |                                      |  |  |              |  | 0.00524155   | 1354.704712 | 678.3596 | 1354.699341 | 678.3569336 | 2 | 8  | 26.5173 |
| 33 | 33.59 | 33.59 | 53.32 | YPR080W; YI | 99.0 | YQVTVIDAPGHR               |                                      |  |  |              |  | -0.0011061   | 1354.698242 | 678.3564 | 1354.699341 | 678.3569336 | 2 | 12 | 25.4418 |
| 33 | 33.59 | 33.59 | 53.32 | YPR080W; YI | 99.0 | YQVTVIDAPGHR               |                                      |  |  |              |  | -0.000129537 | 1354.699219 | 678.3569 | 1354.699341 | 678.3569336 | 2 | 10 | 25.9804 |
| 33 | 33.59 | 33.59 | 53.32 | YPR080W; YI | 99.0 | YQVTVIDAPGHR               |                                      |  |  |              |  | -0.00331678  | 1354.696045 | 678.3553 | 1354.699341 | 678.3569336 | 2 | 9  | 24.9179 |

|      |       |       |                   |                               |                                      |               |             |          |             |             |   |    |         |
|------|-------|-------|-------------------|-------------------------------|--------------------------------------|---------------|-------------|----------|-------------|-------------|---|----|---------|
| 33   | 33.59 | 33.59 | 53.32 YPR080W; YI | 99.0 YQVTVIDAPGHR             | Carbamyl@N-term                      | -0.000897004  | 1354.698364 | 452.5734 | 1354.699341 | 452.5737305 | 3 | 11 | 25.47   |
| 33   | 33.59 | 33.59 | 53.32 YPR080W; YI | 99.0 YQVTVIDAPGHR             |                                      | -0.000388554  | 1397.704834 | 699.8597 | 1397.7052   | 699.8598633 | 2 | 8  | 32.0436 |
| 33   | 33.59 | 33.59 | 53.32 YPR080W; YI | 99.0 SGDAALVK                 |                                      | 0.000272835   | 759.4129028 | 380.7137 | 759.4126587 | 380.713623  | 2 | 6  | 9.978   |
| 33   | 33.59 | 33.59 | 53.32 YPR080W; YI | 99.0 FDELLEK                  |                                      | -0.0088095    | 892.4454956 | 447.23   | 892.4542236 | 447.234375  | 2 | 7  | 29.5889 |
| 33   | 33.59 | 33.59 | 53.32 YPR080W; YI | 98.8 FQEIVK                   |                                      | -0.000675173  | 762.4268799 | 382.2207 | 762.4276123 | 382.2210693 | 2 | 7  | 20.61   |
| 33   | 33.59 | 33.59 | 53.32 YPR080W; YI | 98.8 QLIVAVNK                 |                                      | -0.000765001  | 883.5482788 | 442.7814 | 883.5490723 | 442.7818298 | 2 | 8  | 23.2647 |
| 33   | 33.59 | 33.59 | 53.32 YPR080W; YI | 98.4 YAWVLDK                  |                                      | -0.000178434  | 893.4644775 | 447.7395 | 893.4647217 | 447.739624  | 2 | 7  | 34.2957 |
| 33   | 33.59 | 33.59 | 53.32 YPR080W; YI | 98.4 FDELLEK                  |                                      | 0.00214904    | 892.4562988 | 447.2354 | 892.4542236 | 447.234375  | 2 | 8  | 26.7044 |
| 33   | 33.59 | 33.59 | 53.32 YPR080W; YI | 98.2 LPLQDVYK                 |                                      | -0.000531072  | 974.5430908 | 488.2788 | 974.5437012 | 488.2791138 | 2 | 6  | 32.8539 |
| 33   | 33.59 | 33.59 | 53.32 YPR080W; YI | 97.1 VETGVIKPGMVVTFAPAGVTTVEK | Oxidation(M)@10                      | -0.0120942    | 2445.307129 | 816.1096 | 2445.318848 | 816.1135864 | 3 | 6  | 40.2846 |
| 33   | 33.59 | 33.59 | 53.32 YPR080W; YI | 97.1 FVPSKPMCVEAFSEYPPPLGR    | Oxidation(M)@7; Carbamidomethyl(C)@8 | -0.00157886   | 2326.111084 | 776.3776 | 2326.112549 | 776.3781738 | 3 | 10 | 39.6949 |
| 33   | 33.59 | 33.59 | 53.32 YPR080W; YI | 96.1 FQEIVK                   |                                      | -0.000492068  | 762.427063  | 382.2208 | 762.4276123 | 382.2210693 | 2 | 7  | 20.0596 |
| 33   | 33.59 | 33.59 | 53.32 YPR080W; YI | 95.2 LPLQDVYK                 |                                      | 0.00123895    | 974.5448608 | 488.2797 | 974.5437012 | 488.2791138 | 2 | 7  | 32.2717 |
| 33   | 33.59 | 33.59 | 53.32 YPR080W; YI | 94.9 YAWVLDK                  |                                      | -0.00253106   | 893.4622803 | 447.7384 | 893.4647217 | 447.739624  | 2 | 6  | 37.9239 |
| 33   | 33.59 | 33.59 | 53.32 YPR080W; YI | 91.2 TLLEAIDAIEQPSRPTDKPLR    |                                      | 0.000400817   | 2362.286133 | 591.5788 | 2362.285645 | 591.5786743 | 4 | 9  | 43.6108 |
| 33   | 33.59 | 33.59 | 53.32 YPR080W; YI | 90.9 SHINVVIGHVDSGK           |                                      | -0.0141781    | 1559.827881 | 520.9499 | 1559.842041 | 520.9545898 | 3 | 6  | 29.5606 |
| 33   | 33.59 | 33.59 | 53.32 YPR080W; YI | 90.3 YAWVLDK                  |                                      | -0.019343499  | 893.4452515 | 447.7299 | 893.4647217 | 447.739624  | 2 | 6  | 38.7671 |
| 33   | 33.59 | 33.59 | 53.32 YPR080W; YI | 88.1 ETSNFIK                  |                                      | 0.00033619    | 837.423645  | 419.7191 | 837.4232178 | 419.7189026 | 2 | 7  | 16.3845 |
| 33   | 33.59 | 33.59 | 53.32 YPR080W; YI | 87.5 IGGIGTVPVGR              |                                      | 0.00228998    | 1024.605225 | 513.3099 | 1024.602905 | 513.3087158 | 2 | 6  | 33.4345 |
| 33   | 33.59 | 33.59 | 53.32 YPR080W; YI | 80.4 YAWVLDK                  |                                      | 0.000265449   | 893.4648438 | 447.7397 | 893.4647217 | 447.739624  | 2 | 5  | 39.5834 |
| 33   | 33.59 | 33.59 | 53.32 YPR080W; YI | 78.1 YAWVLDK                  |                                      | -0.00229803   | 893.4624634 | 447.7385 | 893.4647217 | 447.739624  | 2 | 5  | 38.4408 |
| 33   | 33.59 | 33.59 | 53.32 YPR080W; YI | 76.3 TLLEAIDAIEQPSRPTDKPLR    |                                      | -0.00241162   | 2362.283203 | 788.435  | 2362.285645 | 788.435791  | 3 | 9  | 43.5906 |
| 33   | 33.59 | 33.59 | 53.32 YPR080W; YI | 74.8 LPLQDVYK                 |                                      | -0.000775212  | 974.5428467 | 488.2787 | 974.5437012 | 488.2791138 | 2 | 5  | 33.8103 |
| 33   | 33.59 | 33.59 | 53.32 YPR080W; YI | 72.0 QTVAVGVIK                |                                      | -0.0347161    | 913.5249023 | 457.7697 | 913.5596924 | 457.7871094 | 2 | 7  | 24.2268 |
| 933  | 1.1   | 1.1   | 1.493 YPR088C     | 98.7 MFIEEPTR                 |                                      | -0.000669361  | 1021.489685 | 511.7521 | 1021.490295 | 511.7524109 | 2 | 7  | 27.3065 |
| 853  | 1.79  | 1.79  | 5.732 YPR098C     | 99.0 DQFSALQNK                |                                      | -0.00905902   | 1049.505127 | 525.7598 | 1049.51416  | 525.7643433 | 2 | 8  | 22.4271 |
| 266  | 10.41 | 10.41 | 30.12 YPR102C; YC | 99.0 AEEILER                  |                                      | 0.000336072   | 858.4450684 | 430.2298 | 858.4447021 | 430.2296143 | 2 | 8  | 17.8146 |
| 266  | 10.41 | 10.41 | 30.12 YPR102C; YC | 99.0 LVLNISVGESGDR            |                                      | 0.000557888   | 1357.720703 | 679.8676 | 1357.720093 | 679.8673706 | 2 | 11 | 36.6945 |
| 266  | 10.41 | 10.41 | 30.12 YPR102C; YC | 99.0 VLEQLSGQTPVQSK           |                                      | -0.00108631   | 1512.813721 | 757.4141 | 1512.814819 | 757.4146729 | 2 | 14 | 25.3121 |
| 266  | 10.41 | 10.41 | 30.12 YPR102C; YC | 99.0 EDTVSWFK                 |                                      | 0.000238944   | 1010.471252 | 506.2429 | 1010.470886 | 506.2427368 | 2 | 8  | 35.886  |
| 266  | 10.41 | 10.41 | 30.12 YPR102C; YC | 99.0 LVLNISVGESGDR            |                                      | 0.00128983    | 1357.721436 | 679.868  | 1357.720093 | 679.8673706 | 2 | 11 | 37.2037 |
| 266  | 10.41 | 10.41 | 30.12 YPR102C; YC | 98.9 YDADVLDK                 |                                      | -0.000188739  | 937.4390869 | 469.7268 | 937.43927   | 469.7269287 | 2 | 9  | 22.1611 |
| 266  | 10.41 | 10.41 | 30.12 YPR102C; YC | 98.2 YDADVLDK                 |                                      | -0.000162232  | 937.4390869 | 469.7268 | 937.43927   | 469.7269287 | 2 | 7  | 22.8683 |
| 266  | 10.41 | 10.41 | 30.12 YPR102C; YC | 98.1 EDTVSWFK                 |                                      | -0.00229853   | 1010.468689 | 506.2416 | 1010.470886 | 506.2427368 | 2 | 7  | 35.3757 |
| 266  | 10.41 | 10.41 | 30.12 YPR102C; YC | 98.0 VLEQLSGQTPVQSK           |                                      | -0.0056946    | 1512.809082 | 757.4118 | 1512.814819 | 757.4146729 | 2 | 6  | 24.8028 |
| 266  | 10.41 | 10.41 | 30.12 YPR102C; YC | 95.6 IAVHVTVR                 |                                      | -0.00104939   | 893.5437012 | 447.7791 | 893.5446777 | 447.7796326 | 2 | 8  | 19.542  |
| 526  | 4.43  | 4.43  | 12.68 YPR103W     | 99.0 EGPTIYYVDSGTR            |                                      | -0.0057671    | 1571.704712 | 786.8596 | 1571.710327 | 786.8624878 | 2 | 8  | 30.2742 |
| 526  | 4.43  | 4.43  | 12.68 YPR103W     | 99.0 ATAGNWWASQTVK            |                                      | 0.00122489    | 1331.684448 | 666.8495 | 1331.68335  | 666.848938  | 2 | 7  | 25.9064 |
| 526  | 4.43  | 4.43  | 12.68 YPR103W     | 96.9 SILAAHR                  |                                      | 0.00318724    | 837.4852905 | 419.7499 | 837.4820557 | 419.7483215 | 2 | 6  | 13.6873 |
| 567  | 4.03  | 4.03  | 5.14 YPR108W      | 99.0 SQEVEYYDPTVNR            |                                      | -0.00188581   | 1534.724487 | 768.3695 | 1534.726318 | 768.3704224 | 2 | 7  | 25.4352 |
| 567  | 4.03  | 4.03  | 5.14 YPR108W      | 99.0 VPNEYVSEK                |                                      | -0.00142625   | 1063.517334 | 532.7659 | 1063.518555 | 532.7666016 | 2 | 9  | 17.1948 |
| 786  | 2     | 2     | 4.739 YPR113W     | 99.0 AALILADNDAK              | Carbamidomethyl(C)@10                | -0.0014064    | 1113.60144  | 557.808  | 1113.603027 | 557.8087769 | 2 | 11 | 25.7173 |
| 566  | 4.03  | 4.03  | 6.266 YPR118W     | 99.0 IGTQLAVICK               |                                      | 0.000284903   | 1214.705933 | 608.3602 | 1214.705688 | 608.3601074 | 2 | 8  | 39.1321 |
| 566  | 4.03  | 4.03  | 6.266 YPR118W     | 99.0 IPSTLITDSSIAVR           |                                      | 0.00510084    | 1535.824707 | 768.9196 | 1535.81958  | 768.9170532 | 2 | 9  | 38.7699 |
| 631  | 3.32  | 3.32  | 7.038 YPR127W     | 99.0 LDTGYGLMSLTWR            |                                      | -0.000509312  | 1511.743896 | 756.8792 | 1511.744263 | 756.8793945 | 2 | 8  | 50.8227 |
| 631  | 3.32  | 3.32  | 7.038 YPR127W     | 98.8 LTDQEFNAINK              |                                      | 0.000336315   | 1291.641235 | 646.8279 | 1291.640869 | 646.8276978 | 2 | 7  | 26.6645 |
| 647  | 2.97  | 2.97  | 22.63 YPR132W; YI | 99.0 VSGVSLALWK               |                                      | 0.00114399    | 1171.697632 | 586.8561 | 1171.696533 | 586.8555298 | 2 | 9  | 53.3618 |
| 647  | 2.97  | 2.97  | 22.63 YPR132W; YI | 99.0 VSGVSLALWK               |                                      | 0.00121538    | 1171.697632 | 586.8561 | 1171.696533 | 586.8555298 | 2 | 7  | 53.8687 |
| 647  | 2.97  | 2.97  | 22.63 YPR132W; YI | 89.7 WAENNYK                  |                                      | 0.000347735   | 923.4140625 | 462.7143 | 923.4137573 | 462.7141418 | 2 | 7  | 14.4451 |
| 647  | 2.97  | 2.97  | 22.63 YPR132W; YI | 85.0 LLGTAFK                  |                                      | -0.000431148  | 748.447876  | 375.2312 | 748.4483032 | 375.2314453 | 2 | 6  | 27.8607 |
| 647  | 2.97  | 2.97  | 22.63 YPR132W; YI | 71.4 GDIPGVR                  |                                      | -4.26E-05     | 712.3869019 | 357.2007 | 712.3867798 | 357.2006836 | 2 | 6  | 17.9653 |
| 722  | 2.04  | 2.04  | 3.008 YPR133C     | 99.0 SLFAALNDLPVK             |                                      | 0.00122611    | 1286.724731 | 644.3696 | 1286.723389 | 644.3690186 | 2 | 8  | 51.0292 |
| 1020 | 0.5   | 0.5   | 2.174 YPR133W-A   | 94.0 MFLGPQQEVSEEEKR          |                                      | -0.00462256   | 1805.8573   | 602.9597 | 1805.861816 | 602.9611816 | 3 | 7  | 32.7604 |
|      |       |       |                   |                               |                                      | missed K-R@14 |             |          |             |             |   |    |         |

|     |       |       |               |                            |                      |                    |              |             |          |             |             |   |    |         |
|-----|-------|-------|---------------|----------------------------|----------------------|--------------------|--------------|-------------|----------|-------------|-------------|---|----|---------|
| 70  | 25.19 | 25.19 | 26.89 YPR145W | 99.0 AEWGSDIPTTK           |                      |                    | 0.00120076   | 1203.578247 | 602.7964 | 1203.577148 | 602.7958374 | 2 | 9  | 27.676  |
| 70  | 25.19 | 25.19 | 26.89 YPR145W | 99.0 AFDTTGEPDAKPYLPEEILWR |                      |                    | -0.000662424 | 2447.200439 | 816.7407 | 2447.200928 | 816.7409058 | 3 | 11 | 48.7007 |
| 70  | 25.19 | 25.19 | 26.89 YPR145W | 99.0 ASTPMFLLSR            |                      |                    | 2.76E-05     | 1121.590332 | 561.8024 | 1121.590332 | 561.8024292 | 2 | 8  | 41.2219 |
| 70  | 25.19 | 25.19 | 26.89 YPR145W | 99.0 DPIGITTLYMR           |                      |                    | -0.0010865   | 1335.684448 | 668.8495 | 1335.685669 | 668.8500977 | 2 | 9  | 44.0785 |
| 70  | 25.19 | 25.19 | 26.89 YPR145W | 99.0 EQFSDGVGYSWIDGLK      |                      |                    | 0.00773408   | 1799.844238 | 900.9294 | 1799.83667  | 900.9255981 | 2 | 13 | 48.837  |
| 70  | 25.19 | 25.19 | 26.89 YPR145W | 99.0 FDALFPQK              |                      |                    | 0.000657431  | 964.5025024 | 483.2585 | 964.5018311 | 483.2581787 | 2 | 10 | 33.7698 |
| 70  | 25.19 | 25.19 | 26.89 YPR145W | 99.0 HLAGIDDDGK            |                      |                    | -0.003317    | 1039.490112 | 520.7523 | 1039.493408 | 520.7539673 | 2 | 9  | 10.6821 |
| 70  | 25.19 | 25.19 | 26.89 YPR145W | 99.0 LHSFAIGLPNAPDLQAAR    | Deamidated(N)@10     | cleaved S-L@N-term | 0.032181099  | 1891.027222 | 631.3497 | 1890.995239 | 631.3389893 | 3 | 8  | 42.3957 |
| 70  | 25.19 | 25.19 | 26.89 YPR145W | 99.0 NLHLADCLR             | Carbamidomethyl(C)@7 |                    | -0.00578839  | 1110.554688 | 556.2846 | 1110.560425 | 556.2874756 | 2 | 11 | 26.8958 |
| 70  | 25.19 | 25.19 | 26.89 YPR145W | 99.0 NSTIFVHER             |                      |                    | -0.000717748 | 1101.55603  | 551.7853 | 1101.556763 | 551.7856445 | 2 | 9  | 17.3954 |
| 70  | 25.19 | 25.19 | 26.89 YPR145W | 99.0 STMAWGLEAR            |                      |                    | -0.00111425  | 1120.532471 | 561.2735 | 1120.533569 | 561.2740479 | 2 | 11 | 33.8009 |
| 70  | 25.19 | 25.19 | 26.89 YPR145W | 99.0 YFTPDWLDEK            |                      |                    | 0.00330867   | 1312.60083  | 657.3077 | 1312.597534 | 657.3060303 | 2 | 10 | 43.4812 |
| 70  | 25.19 | 25.19 | 26.89 YPR145W | 98.6 NSTIFVHER             |                      |                    | 0.045010202  | 1101.601685 | 551.8081 | 1101.556763 | 551.7856445 | 2 | 8  | 17.6737 |
| 70  | 25.19 | 25.19 | 26.89 YPR145W | 92.2 TVYFASELK             |                      |                    | -0.00424505  | 1056.544922 | 529.2797 | 1056.549194 | 529.2818604 | 2 | 7  | 32.8907 |
| 946 | 0.96  | 0.96  | 2.336 YPR148C | 97.4 LETLNQDFK             |                      |                    | -0.0026336   | 1219.642334 | 610.8284 | 1219.644897 | 610.8297119 | 2 | 8  | 35.4366 |
| 935 | 1.07  | 1.07  | 15.03 YPR154W | 97.5 GSNVISNDVYDQINK       | Deamidated(N)@7      |                    | 0.019722     | 1665.804321 | 833.9094 | 1665.784546 | 833.8995972 | 2 | 6  | 33.9438 |
| 935 | 1.07  | 1.07  | 15.03 YPR154W | 94.3 VQLLEK                |                      |                    | -0.000329461 | 728.4428711 | 365.2287 | 728.4432373 | 365.2288818 | 2 | 6  | 19.3556 |
| 935 | 1.07  | 1.07  | 15.03 YPR154W | 73.1 WDPANAPR              |                      |                    | -0.00124444  | 925.4394531 | 463.727  | 925.4406128 | 463.7275696 | 2 | 5  | 19.7451 |
| 36  | 33.15 | 33.15 | 21.22 YPR160W | 99.0 DNLVIDWNK             |                      |                    | -0.000262825 | 1115.560913 | 558.7877 | 1115.561157 | 558.7878418 | 2 | 9  | 37.3625 |
| 36  | 33.15 | 33.15 | 21.22 YPR160W | 99.0 ENDGVDIINR            |                      |                    | 0.000400006  | 1143.55249  | 572.7835 | 1143.552002 | 572.7832642 | 2 | 8  | 24.3003 |
| 36  | 33.15 | 33.15 | 21.22 YPR160W | 99.0 FIDHVETTLAR           |                      |                    | 0.0105213    | 1300.688232 | 434.57   | 1300.67749  | 434.5664673 | 3 | 10 | 26.7245 |
| 36  | 33.15 | 33.15 | 21.22 YPR160W | 99.0 FVNVTNGITPR           |                      |                    | 0.00175147   | 1216.658325 | 609.3364 | 1216.656372 | 609.3355103 | 2 | 11 | 29.8669 |
| 36  | 33.15 | 33.15 | 21.22 YPR160W | 99.0 GALDDLGFK             |                      |                    | 0.00191289   | 934.4778442 | 468.2462 | 934.4760132 | 468.2452698 | 2 | 9  | 36.5476 |
| 36  | 33.15 | 33.15 | 21.22 YPR160W | 99.0 IEDPEDPAASK           |                      |                    | -0.00217999  | 1170.53833  | 586.2764 | 1170.540405 | 586.2775269 | 2 | 8  | 14.7117 |
| 36  | 33.15 | 33.15 | 21.22 YPR160W | 99.0 ISIIENSPER            |                      |                    | -0.0028978   | 1285.648438 | 643.8315 | 1285.651367 | 643.8329468 | 2 | 11 | 26.6042 |
| 36  | 33.15 | 33.15 | 21.22 YPR160W | 99.0 NEVQIPVTFYGYVDRPEGGK  |                      |                    | 0.00700052   | 2267.12915  | 756.717  | 2267.122314 | 756.7147217 | 3 | 9  | 43.2857 |
| 36  | 33.15 | 33.15 | 21.22 YPR160W | 99.0 NGASIEEVAK            |                      |                    | -0.008587    | 1016.505249 | 509.2599 | 1016.513855 | 509.2641907 | 2 | 10 | 17.1048 |
| 36  | 33.15 | 33.15 | 21.22 YPR160W | 99.0 QQLNVFGIYR            |                      |                    | 0.000283383  | 1349.74585  | 675.8802 | 1349.745605 | 675.8800659 | 2 | 8  | 49.889  |
| 36  | 33.15 | 33.15 | 21.22 YPR160W | 99.0 SVLSVANVGFFSSDR       |                      |                    | 0.000294906  | 1583.794678 | 792.9046 | 1583.794312 | 792.90448   | 2 | 11 | 47.7694 |
| 36  | 33.15 | 33.15 | 21.22 YPR160W | 99.0 VLAVAYDFVPVPGFK       |                      |                    | -0.000196365 | 1521.82312  | 761.9188 | 1521.82312  | 761.9188232 | 2 | 10 | 51.8114 |
| 36  | 33.15 | 33.15 | 21.22 YPR160W | 99.0 VVAVADYNVSK           |                      |                    | 0.00235518   | 1239.652222 | 620.8334 | 1239.649902 | 620.8322754 | 2 | 9  | 32.6525 |
| 36  | 33.15 | 33.15 | 21.22 YPR160W | 99.0 YEYGIFAQK             |                      |                    | 0.000807563  | 1117.545288 | 559.7799 | 1117.544434 | 559.77948   | 2 | 9  | 33.5365 |
| 36  | 33.15 | 33.15 | 21.22 YPR160W | 99.0 TTLSASQWIGGER         |                      |                    | -0.000807679 | 1404.699097 | 703.3568 | 1404.699707 | 703.3571777 | 2 | 10 | 35.1669 |
| 36  | 33.15 | 33.15 | 21.22 YPR160W | 97.5 DVDLLSR               |                      |                    | -0.00365141  | 816.430481  | 409.2225 | 816.4341431 | 409.2243347 | 2 | 6  | 26.96   |
| 36  | 33.15 | 33.15 | 21.22 YPR160W | 95.6 ISIIENSPER            |                      |                    | 0.034944002  | 1285.686523 | 643.8505 | 1285.651367 | 643.8329468 | 2 | 9  | 26.6659 |
| 36  | 33.15 | 33.15 | 21.22 YPR160W | 88.7 VLVDEK                |                      |                    | -0.000578933 | 814.4794922 | 408.247  | 814.4800415 | 408.2472839 | 2 | 7  | 26.052  |
| 211 | 12.65 | 12.65 | 19.54 YPR163C | 99.0 ADLVAVLK              |                      |                    | -0.00204625  | 827.5096436 | 414.7621 | 827.5116577 | 414.763092  | 2 | 9  | 33.2362 |
| 211 | 12.65 | 12.65 | 19.54 YPR163C | 99.0 EEVDIDWTAAR           |                      |                    | -0.00296344  | 1303.60144  | 652.808  | 1303.604492 | 652.8095093 | 2 | 8  | 35.2296 |
| 211 | 12.65 | 12.65 | 19.54 YPR163C | 99.0 GGGADVDWSSAR          |                      |                    | -0.00234135  | 1176.513672 | 589.2641 | 1176.515991 | 589.2652588 | 2 | 9  | 22.2599 |
| 211 | 12.65 | 12.65 | 19.54 YPR163C | 99.0 SGGFGGSGFGR           |                      |                    | -0.000799314 | 984.4404907 | 493.2275 | 984.4413452 | 493.2279358 | 2 | 10 | 23.1629 |
| 211 | 12.65 | 12.65 | 19.54 YPR163C | 98.8 EREEPDIDWSAAR         |                      | missed R-E@2       | 0.00157414   | 1572.718628 | 525.2468 | 1572.716797 | 525.2462158 | 3 | 9  | 28.4437 |
| 211 | 12.65 | 12.65 | 19.54 YPR163C | 97.9 EDAPDLWDGAAR          |                      |                    | 0.00230493   | 1314.586426 | 658.3005 | 1314.583984 | 658.2993164 | 2 | 8  | 33.3269 |
| 211 | 12.65 | 12.65 | 19.54 YPR163C | 91.2 EREEVDIDWTAAR         |                      | missed R-E@2       | 0.00114082   | 1588.74939  | 530.5904 | 1588.748169 | 530.5899658 | 3 | 8  | 31.824  |
| 211 | 12.65 | 12.65 | 19.54 YPR163C | 85.5 TAQLTVEDGDNWEVVGK     |                      |                    | -0.00165393  | 1859.888428 | 930.9515 | 1859.890137 | 930.9523315 | 2 | 5  | 36.9987 |
| 398 | 6.98  | 6.98  | 28.88 YPR165W | 99.0 NDPQTIEQLR            |                      |                    | -0.000272855 | 1212.609619 | 607.3121 | 1212.609863 | 607.3121948 | 2 | 10 | 23.5514 |
| 398 | 6.98  | 6.98  | 28.88 YPR165W | 99.0 VELALWDTAGQEDYDR      |                      |                    | -0.00540473  | 1879.853516 | 940.934  | 1879.858765 | 940.9367065 | 2 | 12 | 43.9883 |
| 398 | 6.98  | 6.98  | 28.88 YPR165W | 99.0 TCLLVFSK              | Carbamidomethyl(C)@2 |                    | 0.000542583  | 1079.605469 | 540.81   | 1079.604858 | 540.8097534 | 2 | 6  | 45.1943 |
| 398 | 6.98  | 6.98  | 28.88 YPR165W | 94.3 LVIVGDGACGK           | Carbamidomethyl(C)@9 |                    | 0.00261157   | 1087.572266 | 544.7934 | 1087.56958  | 544.7920532 | 2 | 8  | 23.4373 |
| 398 | 6.98  | 6.98  | 28.88 YPR165W | 89.9 EVFEAAATR             |                      |                    | -0.000414492 | 921.4552612 | 461.7349 | 921.4555664 | 461.7350769 | 2 | 7  | 17.3981 |
| 199 | 13.49 | 13.49 | 15.16 YPR181C | 99.0 AETDDGADVIR           |                      |                    | -0.00212069  | 1160.528931 | 581.2717 | 1160.531006 | 581.2727661 | 2 | 6  | 16.7832 |
| 199 | 13.49 | 13.49 | 15.16 YPR181C | 99.0 AGYQDDPQYADFK         |                      |                    | -0.001593    | 1516.645508 | 759.33   | 1516.647095 | 759.3308105 | 2 | 9  | 27.8187 |
| 199 | 13.49 | 13.49 | 15.16 YPR181C | 99.0 LEAAELLVDR            |                      |                    | 0.00275951   | 1127.62146  | 564.818  | 1127.618652 | 564.8165894 | 2 | 9  | 37.5876 |
| 199 | 13.49 | 13.49 | 15.16 YPR181C | 99.0 LNPSDNYQDMAR          |                      |                    | 0.0050191    | 1422.624878 | 712.3197 | 1422.619751 | 712.3171387 | 2 | 11 | 23.6118 |

|     |       |       |       |         |      |                       |                                                               |              |             |          |             |             |   |    |         |
|-----|-------|-------|-------|---------|------|-----------------------|---------------------------------------------------------------|--------------|-------------|----------|-------------|-------------|---|----|---------|
| 199 | 13.49 | 13.49 | 15.16 | YPR181C | 99.0 | EYDELNVAPYNPVVCSGPHCK | Deamidated(N)@6; Carbamidomethyl(C)@15; Carbamidomethyl(C)@20 | 0.0241723    | 2448.096924 | 817.0396 | 2448.07251  | 817.0314941 | 3 | 9  | 35.9064 |
| 199 | 13.49 | 13.49 | 15.16 | YPR181C | 98.4 | NSSWSCPICNSR          | Carbamidomethyl(C)@6; Carbamidomethyl(C)@9                    | -0.00236973  | 1466.600708 | 734.3076 | 1466.603027 | 734.3088379 | 2 | 6  | 25.2799 |
| 199 | 13.49 | 13.49 | 15.16 | YPR181C | 95.0 | FTWNVFPSTR            |                                                               | 0.00163621   | 1253.62085  | 627.8177 | 1253.619263 | 627.8169556 | 2 | 7  | 45.6356 |
| 199 | 13.49 | 13.49 | 15.16 | YPR181C | 92.1 | VQGLIGHASAVK          |                                                               | -1.32E-05    | 1178.677124 | 590.3458 | 1178.677124 | 590.3458252 | 2 | 6  | 19.1162 |
| 199 | 13.49 | 13.49 | 15.16 | YPR181C | 73.2 | FIDTEAGGSQAR          |                                                               | 0.000462968  | 1250.589722 | 626.3021 | 1250.589111 | 626.3018188 | 2 | 5  | 15.8962 |
| 243 | 11.31 | 11.31 | 30.25 | YPR183W | 99.0 | IALELLAK              |                                                               | 0.00036789   | 869.559082  | 435.7868 | 869.5585938 | 435.7865906 | 2 | 11 | 38.8855 |
| 243 | 11.31 | 11.31 | 30.25 | YPR183W | 99.0 | LFAGMSPEMAK           |                                                               | 0.00057007   | 1180.562622 | 591.2886 | 1180.562012 | 591.2883301 | 2 | 11 | 33.5244 |
| 243 | 11.31 | 11.31 | 30.25 | YPR183W | 99.0 | LFESLHDHAFTLGTR       |                                                               | -0.00122778  | 1742.872559 | 581.9648 | 1742.874023 | 581.965271  | 3 | 9  | 36.1408 |
| 243 | 11.31 | 11.31 | 30.25 | YPR183W | 99.0 | VAIGEVPFTFGVR         |                                                               | -0.00129397  | 1390.759644 | 696.3871 | 1390.760864 | 696.3876953 | 2 | 14 | 49.0381 |
| 243 | 11.31 | 11.31 | 30.25 | YPR183W | 99.0 | YLENCNPR              | Carbamidomethyl(C)@5                                          | 0.00097031   | 1064.471924 | 533.2432 | 1064.470947 | 533.2427368 | 2 | 8  | 11.1799 |
| 243 | 11.31 | 11.31 | 30.25 | YPR183W | 92.5 | LNKPLTTR              |                                                               | -0.000770776 | 1054.649048 | 528.3318 | 1054.649902 | 528.3322144 | 2 | 6  | 24.4672 |
| 243 | 11.31 | 11.31 | 30.25 | YPR183W | 77.2 | DINSQGFK              |                                                               | -0.000215327 | 907.4396973 | 454.7271 | 907.4399414 | 454.7272644 | 2 | 5  | 16.1772 |
| 725 | 2.04  | 2.04  | 13.97 | YPR187W | 99.0 | TIVTGGNGPEDFQQHEQIR   | Deamidated(N)@7                                               | 0.0142973    | 2126.017334 | 709.6797 | 2126.00293  | 709.6749268 | 3 | 13 | 27.4705 |
| 80  | 22.96 | 22.96 | 40.57 | YPR191W | 99.0 | DGVAHLLNR             |                                                               | -0.0106908   | 993.5249023 | 497.7697 | 993.5355835 | 497.7750549 | 2 | 10 | 23.0783 |
| 80  | 22.96 | 22.96 | 40.57 | YPR191W | 99.0 | DLSAINYTK             |                                                               | 0.00131006   | 1120.577637 | 561.2961 | 1120.576416 | 561.2954712 | 2 | 10 | 26.7231 |
| 80  | 22.96 | 22.96 | 40.57 | YPR191W | 99.0 | ENLEVSGENVVEADLK      |                                                               | -0.00348985  | 1743.849243 | 872.9319 | 1743.852661 | 872.9335938 | 2 | 9  | 38.6889 |
| 80  | 22.96 | 22.96 | 40.57 | YPR191W | 99.0 | FFLGEENR              |                                                               | 0.00306961   | 1010.485291 | 506.2499 | 1010.482117 | 506.2483521 | 2 | 8  | 30.0969 |
| 80  | 22.96 | 22.96 | 40.57 | YPR191W | 99.0 | FIGDSVAAIGIPVVK       |                                                               | -0.0014395   | 1499.833496 | 750.924  | 1499.834839 | 750.9246826 | 2 | 8  | 42.3306 |
| 80  | 22.96 | 22.96 | 40.57 | YPR191W | 99.0 | FNQNTNTR              |                                                               | -0.000181444 | 1140.531128 | 571.2728 | 1140.53125  | 571.2728882 | 2 | 8  | 22.3739 |
| 80  | 22.96 | 22.96 | 40.57 | YPR191W | 99.0 | FVDESLLSTLPAGK        |                                                               | -0.000880322 | 1475.786255 | 738.9004 | 1475.787109 | 738.9008789 | 2 | 16 | 43.0774 |
| 80  | 22.96 | 22.96 | 40.57 | YPR191W | 99.0 | GLGNPLLYDGVER         |                                                               | 0.00053744   | 1401.72583  | 701.8702 | 1401.72522  | 701.869873  | 2 | 12 | 38.502  |
| 80  | 22.96 | 22.96 | 40.57 | YPR191W | 99.0 | SAEDQLYAITFR          |                                                               | 0.00359827   | 1412.697266 | 707.3559 | 1412.693604 | 707.3540649 | 2 | 14 | 42.8251 |
| 80  | 22.96 | 22.96 | 40.57 | YPR191W | 99.0 | TAFKPHELTESVLPAAAR    |                                                               | 0.00201719   | 1866.001831 | 623.0079 | 1866        | 623.0072632 | 3 | 10 | 31.0792 |
| 80  | 22.96 | 22.96 | 40.57 | YPR191W | 99.0 | YDYAVAEQCPVK          | Carbamidomethyl(C)@9                                          | -0.00214909  | 1441.65271  | 721.8336 | 1441.654785 | 721.8346558 | 2 | 12 | 25.7159 |
| 80  | 22.96 | 22.96 | 40.57 | YPR191W | 87.8 | ISTLAVK               |                                                               | 0.000228324  | 730.4590454 | 366.2368 | 730.4588623 | 366.2367249 | 2 | 6  | 17.478  |
